# Supplementary material
Source: HighWire-hosted journal article supplement (doi:10.1101/rna.079569.122)
Supplement: Supplemental_Note.docx [file Supplemental_Note.docx]

SUPPLEMENTAL NOTE

SAFB/2 loss does not cause major disruptions to steady-state levels of H3K27me3 or *Xist*-induced accumulation of H3K27me3

Because of the many links between SAFB and transcriptional repression, including but not limited to PRC2-mediated silencing ([Townson et al. 2004](#b81); [Mukhopadhyay et al. 2014](#b57); [Huo et al. 2020](#b36); [McCarthy et al. 2021](#b54)), because SAFB has previously been shown to associate with the lncRNA *Xist* ([Chu et al. 2015](#b15); [Bousard et al. 2019](#b7)), and because our own RNA-seq data show that many of the genes whose expression changes upon SAFB/2 DKO are regulated by PRC2 in ESCs, we asked whether loss of SAFB/2 in ESCs affected H3K27me3 levels. We performed H3K27me3 ChIP-seq in our three WT and two DKO ESC lines, as well as two additional replicate ChIPs for our “Parent WT” and “DKO13” lines. We also performed total H3 ChIP-seq in two replicates each of the Parent WT and DKO13 ESCs as a control to monitor overall H3 density. Using MACS2 ([Zhang et al. 2008](#b90)), we identified a total of 57,909 peaks of H3K27me3 in ESCs: 10,898 Peaks were specific to WT ESCs, 18,837 were specific to DKO ESCs, and 28,174 were detected in both genotypes (Supplemental Fig. S1A). The highest levels of H3K27me3 were found under the peaks that were detected in both WT and DKO cells, and at these peaks, SAFB/2 DKO appeared to result in a slight increase in overall levels of H3K27me3 (Supplemental Fig. S1A,B; Supplemental Table S8). The WT- and DKO-specific peaks each harbored lower overall levels of H3K27me3 than the set of shared peaks, and likewise exhibited minor differences between genotypes (Supplemental Fig. S1B). In parallel, we examined the levels of H3K27me3 at the promoters of genes whose expression changed upon SAFB/2 DKO and found no major differences between gene classes (Supplemental Fig. S1C). Lastly, our WT and DKO cells are F1-hybrids that express doxycycline-inducible *Xist* from the *Rosa26* locus on the B6-derived copy of chromosome 6 ([Trotman et al. 2020](#b82)). We observed no major differences in the accumulation of H3K27me3 on the *Xist*-expressing allele in WT versus DKO cells, nor did we observe any defect in gene silencing (Supplemental Fig. S1D,E; Supplemental Table S9). Together, our data suggest that in mouse ESCs, SAFB is not required for the overall maintenance of H3K27me3, nor is it required for the deposition of H3K27me3 or gene silencing triggered by the expression of *Xist*. However, SAFB/2 loss may moderately affect local levels of H3K27me3 in select genomic regions.
