# Supplementary material
Source: HighWire-hosted journal article supplement (doi:10.1101/rna.079569.122)
Supplement: Supplemental_Table_S1.xlsx [file Supplemental_Table_S1.xlsx]

## Sheet: Sheet1
	Chr	Start	End	Strand	Length	rmce_saf_Aligned_filteredsq30.out.sam	wt20_saf_Aligned_filteredsq30.out.sam	wt44_saf_Aligned_filteredsq30.out.sam	igg_Aligned_filteredsq30.out.sam	dko4_saf_Aligned_filteredsq30.out.sam	dko13_saf_Aligned_filteredsq30.out.sam	flag3xfeGFP_Aligned_filteredsq30.out.sam	flag3xfSAFB_Aligned_filteredsq30.out.sam	five_reads	rpmRMCEsafb1	rpmWT20safb1	rpmWT44safb1	rpmIGG	rpmDKO4safb1	rpmDKO13safb1	rpmEGFP	rpmSAFB	Rescue	IgGfilt	averagewt	averagedko	DKOfilt	baseMean	log2FoldChange	lfcSE	stat	pvalue	padj	codingClass	exonClass	counts-DNA	counts-LINE	counts-Low_complexity	counts-LTR	counts-Other	counts-RC	counts-RNA	counts-rRNA	counts-Satellite	counts-scRNA	counts-Simple_repeat	counts-SINE	counts-snRNA	counts-srpRNA
wt_saf_neg_peak_4	chr1	3220599	3221198	-	600	13	8	4	0	0	0	0	4	Yes	0.349938	0.236929	0.1202	0	0	0	0	0.264436	N/A	Yes	0.235689	0	Yes	4.31889	-5.11687	1.82068	-2.81042	0.00494774	0.0530624	protein_coding	intronic	0	0	0	0	0	0	0	0	0	0	0	0	0	0
wt_saf_neg_peak_8	chr1	3263909	3264928	-	1020	37	26	18	14	6	0	0	4	Yes	0.995978	0.770019	0.540901	0.190003	0.182129	0	0	0.264436	N/A	Yes	0.768966	0.0910646	Yes	15.4125	-2.81225	0.867827	-3.24056	0.00119294	0.0183933	protein_coding	intronic	0	1	0	1	0	0	0	0	0	0	0	0	0	0
wt_saf_neg_peak_10	chr1	3286889	3287299	-	411	21	12	20	0	1	0	0	3	Yes	0.565285	0.355393	0.601001	0	0.0303549	0	0	0.198327	N/A	Yes	0.507227	0.0151774	Yes	9.56631	-4.78622	1.60845	-2.97567	0.00292352	0.0362884	protein_coding	intronic	0	1	0	0	0	0	0	0	0	0	1	0	0	0
wt_saf_neg_peak_27	chr1	3370241	3370875	-	635	15	17	7	3	0	0	0	4	Yes	0.403775	0.503474	0.21035	0.0407149	0	0	0	0.264436	N/A	Yes	0.372533	0	Yes	6.79471	-5.76877	1.69289	-3.40765	0.000655246	0.0115557	protein_coding	intronic	0	0	0	0	0	0	0	0	0	0	0	0	0	0
wt_saf_neg_peak_29	chr1	3375437	3375824	-	388	8	15	7	6	0	0	0	4	Yes	0.215347	0.444242	0.21035	0.0814298	0	0	0	0.264436	N/A	Yes	0.28998	0	Yes	5.27761	-5.40209	1.75408	-3.07972	0.00207194	0.0280126	protein_coding	exonic	0	1	0	0	0	0	0	0	0	0	0	0	0	0
wt_saf_neg_peak_30	chr1	3376130	3376709	-	580	40	6	10	0	2	0	0	4	Yes	1.07673	0.177697	0.300501	0	0.0607097	0	0	0.264436	N/A	Yes	0.51831	0.0303549	Yes	10.0242	-3.83842	1.33827	-2.86819	0.00412828	0.0466021	protein_coding	exonic	0	1	0	0	0	0	0	0	0	0	0	0	0	0
wt_saf_neg_peak_33	chr1	3391605	3391888	-	284	11	7	2	19	0	0	0	0	Yes	0.296102	0.207313	0.0601001	0.257861	0	0	0	0	N/A	No	0.187838	0	Yes	3.43597	-4.78801	1.9231	-2.48974	0.0127837	0.101508	protein_coding	intronic	0	1	0	0	0	0	0	0	0	0	0	0	0	0
wt_saf_neg_peak_35	chr1	3399716	3400541	-	826	12	5	13	15	0	0	0	0	Yes	0.32302	0.148081	0.390651	0.203575	0	0	0	0	N/A	No	0.28725	0	Yes	5.30885	-5.40907	1.75947	-3.07426	0.00211027	0.0283986	protein_coding	intronic	0	0	0	0	0	0	0	0	0	0	0	0	0	0
wt_saf_neg_peak_41	chr1	3413408	3414234	-	827	9	17	10	26	2	0	0	3	Yes	0.242265	0.503474	0.300501	0.352863	0.0607097	0	0	0.198327	N/A	No	0.348747	0.0303549	Yes	6.79514	-3.24044	1.34772	-2.40439	0.0161994	0.118552	protein_coding	intronic	0	0	0	1	0	0	0	0	0	0	0	1	0	0
wt_saf_neg_peak_44	chr1	3420185	3420478	-	294	5	9	4	0	0	0	0	2	Yes	0.134592	0.266545	0.1202	0	0	0	0	0.132218	N/A	Yes	0.173779	0	Yes	3.16246	-4.66356	1.9251	-2.4225	0.015414	0.114712	protein_coding	intronic	0	1	0	0	0	0	0	0	0	0	0	0	0	0
wt_saf_neg_peak_47	chr1	3451502	3451845	-	344	9	14	11	0	0	0	0	0	Yes	0.242265	0.414626	0.330551	0	0	0	0	0	N/A	Yes	0.329147	0	Yes	6.0167	-5.58974	1.71101	-3.26693	0.00108722	0.0171105	protein_coding	intronic	0	0	0	0	0	0	0	0	0	0	0	0	0	0
wt_saf_neg_peak_51	chr1	3484061	3484380	-	320	13	6	4	9	0	0	0	0	Yes	0.349938	0.177697	0.1202	0.122145	0	0	0	0	N/A	No	0.215945	0	Yes	3.96743	-4.9947	1.85188	-2.69711	0.00699451	0.0675916	protein_coding	intronic	0	0	0	0	0	0	0	0	0	0	0	0	0	0
wt_saf_neg_peak_52	chr1	3488582	3488747	-	166	9	8	2	0	0	0	0	1	Yes	0.242265	0.236929	0.0601001	0	0	0	0	0.0661091	N/A	Yes	0.179765	0	Yes	3.27866	-4.71954	1.93528	-2.43869	0.0147405	0.111482	protein_coding	intronic	0	0	0	1	0	0	0	0	0	0	0	0	0	0
wt_saf_neg_peak_58	chr1	3498760	3499049	-	290	7	2	5	0	0	0	0	1	Yes	0.188428	0.0592322	0.15025	0	0	0	0	0.0661091	N/A	Yes	0.132637	0	Yes	2.45247	-4.29718	2.05295	-2.09317	0.0363337	NA	protein_coding	intronic	0	0	0	0	0	0	0	0	0	0	0	0	0	0
wt_saf_neg_peak_59	chr1	3503459	3503977	-	519	10	8	1	0	0	0	0	0	Yes	0.269183	0.236929	0.0300501	0	0	0	0	0	N/A	Yes	0.178721	0	Yes	3.2581	-4.71145	1.97485	-2.38573	0.0170453	0.122604	protein_coding	intronic	0	0	0	0	0	0	0	0	0	0	1	1	0	0
wt_saf_neg_peak_63	chr1	3524121	3524252	-	132	5	6	5	3	0	0	0	0	Yes	0.134592	0.177697	0.15025	0.0407149	0	0	0	0	N/A	Yes	0.15418	0	Yes	2.82234	-4.49838	1.95966	-2.29549	0.0217051	NA	protein_coding	intronic	0	0	0	0	0	0	0	0	0	0	0	0	0	0
wt_saf_neg_peak_73	chr1	3560218	3561073	-	856	48	25	29	44	7	2	0	0	Yes	1.29208	0.740403	0.871452	0.597152	0.212484	0.0620941	0	0	N/A	No	0.967978	0.137289	Yes	19.8125	-2.55648	0.724158	-3.53028	0.000415113	0.00801183	protein_coding	intronic	0	2	0	0	0	0	0	0	0	0	1	0	0	0
wt_saf_neg_peak_74	chr1	3565676	3565960	-	285	6	7	3	10	0	0	0	3	Yes	0.16151	0.207313	0.0901502	0.135716	0	0	0	0.198327	N/A	No	0.152991	0	Yes	2.79044	-4.48471	1.97648	-2.26904	0.0232661	NA	protein_coding	intronic	0	1	0	0	0	0	0	0	0	0	0	0	0	0
wt_saf_neg_peak_78	chr1	3574527	3576390	-	1864	30	40	43	21	15	3	0	0	Yes	0.80755	1.18464	1.29215	0.285004	0.455323	0.0931411	0	0	N/A	Yes	1.09478	0.274232	Yes	24.0569	-1.73153	0.623633	-2.77652	0.00549443	0.0570817	protein_coding	intronic	0	3	0	0	0	0	0	0	2	0	4	0	0	0
wt_saf_neg_peak_79	chr1	3581445	3581787	-	343	10	16	7	33	3	0	0	0	Yes	0.269183	0.473858	0.21035	0.447864	0.0910646	0	0	0	N/A	No	0.317797	0.0455323	Yes	6.44386	-2.52656	1.24312	-2.03244	0.0421096	0.222273	protein_coding	intronic	0	0	0	0	0	0	0	0	0	0	0	0	0	0
wt_saf_neg_peak_80	chr1	3583820	3584839	-	1020	24	25	15	81	0	3	0	0	Yes	0.64604	0.740403	0.450751	1.0993	0	0.0931411	0	0	N/A	No	0.612398	0.0465706	Yes	11.8963	-3.44882	1.06854	-3.2276	0.00124833	0.0190439	protein_coding	intronic	0	1	0	1	0	0	0	0	0	0	0	0	0	0
wt_saf_neg_peak_82	chr1	3589380	3589491	-	112	5	11	3	0	0	0	0	0	Yes	0.134592	0.325777	0.0901502	0	0	0	0	0	N/A	Yes	0.183506	0	Yes	3.32684	-4.73745	1.92462	-2.4615	0.0138356	0.106956	protein_coding	intronic	0	1	0	0	0	0	0	0	0	0	0	0	0	0
wt_saf_neg_peak_83	chr1	3591864	3592078	-	215	2	17	6	0	0	0	0	0	Yes	0.0538367	0.503474	0.1803	0	0	0	0	0	N/A	Yes	0.24587	0	Yes	4.44288	-5.1518	1.87248	-2.75133	0.00593544	0.0603118	protein_coding	intronic	0	0	0	0	0	0	0	0	0	0	0	0	0	0
wt_saf_neg_peak_87	chr1	3601465	3601820	-	356	5	14	8	26	0	0	0	0	Yes	0.134592	0.414626	0.240401	0.352863	0	0	0	0	N/A	No	0.263206	0	Yes	4.7894	-5.2602	1.79072	-2.93747	0.003309	0.0398079	protein_coding	intronic	0	1	0	0	0	0	0	0	0	0	0	1	0	0
wt_saf_neg_peak_90	chr1	3609763	3610149	-	387	3	7	5	2	0	0	0	0	Yes	0.080755	0.207313	0.15025	0.0271433	0	0	0	0	N/A	Yes	0.146106	0	Yes	2.66503	-4.41403	2.00111	-2.20579	0.0273989	NA	protein_coding	intronic	0	0	0	0	0	0	0	0	0	0	1	0	0	0
wt_saf_neg_peak_99	chr1	3622221	3622464	-	244	11	2	9	14	0	0	0	4	Yes	0.296102	0.0592322	0.270451	0.190003	0	0	0	0.264436	N/A	No	0.208595	0	Yes	3.86684	-4.95328	1.88716	-2.62473	0.00867176	0.0784077	protein_coding	intronic	0	1	0	0	0	0	0	0	0	0	0	0	0	0
wt_saf_neg_peak_102	chr1	3626471	3626935	-	465	28	14	13	16	0	0	0	0	Yes	0.753713	0.414626	0.390651	0.217146	0	0	0	0	N/A	No	0.519663	0	Yes	9.55472	-6.26106	1.628	-3.84586	0.000120132	0.00289302	protein_coding	intronic	0	1	0	0	0	0	0	0	0	0	0	0	0	0
wt_saf_neg_peak_104	chr1	3629754	3630111	-	358	7	23	9	16	4	0	0	0	Yes	0.188428	0.681171	0.270451	0.217146	0.121419	0	0	0	N/A	No	0.380017	0.0607097	Yes	7.76772	-2.36472	1.15764	-2.04271	0.0410812	0.218609	protein_coding	intronic	0	1	0	0	0	0	0	0	0	0	0	0	0	0
wt_saf_neg_peak_105	chr1	3631969	3632214	-	246	17	11	3	16	0	0	0	0	Yes	0.457612	0.325777	0.0901502	0.217146	0	0	0	0	N/A	No	0.29118	0	Yes	5.32508	-5.41986	1.78459	-3.03703	0.00238918	0.0311375	protein_coding	intronic	0	0	0	1	0	0	0	0	0	0	0	0	0	0
wt_saf_neg_peak_106	chr1	3633096	3633350	-	255	15	7	5	14	0	0	0	0	Yes	0.403775	0.207313	0.15025	0.190003	0	0	0	0	N/A	No	0.253779	0	Yes	4.66327	-5.22755	1.79764	-2.90801	0.0036374	0.0426149	protein_coding	intronic	0	0	0	0	0	0	0	0	0	0	0	0	0	0
wt_saf_neg_peak_108	chr1	3638680	3639083	-	404	22	18	15	57	5	2	0	0	Yes	0.592203	0.53309	0.450751	0.773583	0.151774	0.0620941	0	0	N/A	No	0.525348	0.106934	Yes	11.1955	-2.03013	0.860825	-2.35835	0.0183564	0.128345	protein_coding	intronic	0	0	0	1	0	0	0	0	0	0	1	0	0	0
wt_saf_neg_peak_109	chr1	3641673	3642472	-	800	37	33	34	25	7	5	0	0	Yes	0.995978	0.977332	1.0217	0.339291	0.212484	0.155235	0	0	N/A	Yes	0.998337	0.18386	Yes	21.0224	-2.17287	0.639164	-3.39954	0.000674985	0.0118311	protein_coding	intronic	0	0	0	2	0	0	0	0	0	0	1	0	0	0
wt_saf_neg_peak_110	chr1	3643739	3644179	-	441	14	16	16	9	0	4	0	0	Yes	0.376857	0.473858	0.480801	0.122145	0	0.124188	0	0	N/A	Yes	0.443839	0.0620941	Yes	9.07012	-2.5647	1.05688	-2.42668	0.0152376	0.113891	protein_coding	intronic	1	0	0	0	0	0	0	0	0	0	0	0	0	0
wt_saf_neg_peak_112	chr1	3645672	3645943	-	272	17	11	20	27	0	0	0	0	Yes	0.457612	0.325777	0.601001	0.366434	0	0	0	0	N/A	No	0.461463	0	Yes	8.50534	-6.08875	1.64345	-3.70487	0.000211502	0.0046165	protein_coding	intronic	0	0	0	0	0	0	0	0	0	0	0	0	0	0
wt_saf_neg_peak_113	chr1	3646403	3646663	-	261	7	5	22	5	0	2	0	0	Yes	0.188428	0.148081	0.661101	0.0678582	0	0.0620941	0	0	N/A	Yes	0.332537	0.031047	Yes	6.62691	-3.16082	1.40857	-2.24399	0.0248333	0.156857	protein_coding	intronic	0	0	0	0	0	0	0	0	0	0	0	0	0	0
wt_saf_neg_peak_116	chr1	3652289	3652919	-	631	23	10	6	5	0	0	0	1	Yes	0.619122	0.296161	0.1803	0.0678582	0	0	0	0.0661091	N/A	Yes	0.365194	0	Yes	6.70969	-5.753	1.71519	-3.35414	0.000796119	0.0134563	protein_coding	intronic	0	1	0	0	0	0	0	0	0	0	0	2	0	0
wt_saf_neg_peak_117	chr1	3653835	3654533	-	699	24	25	27	33	1	6	0	0	Yes	0.64604	0.740403	0.811352	0.447864	0.0303549	0.186282	0	0	N/A	No	0.732598	0.108319	Yes	15.0609	-2.48625	0.811071	-3.06539	0.00217383	0.0290277	protein_coding	intronic	0	2	0	1	0	0	0	0	0	0	0	0	0	0
wt_saf_neg_peak_120	chr1	3660630	3661069	-	440	23	7	24	28	1	5	0	0	Yes	0.619122	0.207313	0.721202	0.380006	0.0303549	0.155235	0	0	N/A	No	0.515879	0.092795	Yes	10.9365	-2.21392	0.961519	-2.30252	0.0213059	0.14128	protein_coding	intronic	0	0	0	1	0	0	0	0	0	0	1	0	0	0
wt_saf_neg_peak_122	chr1	3665229	3665800	-	572	15	21	22	34	4	4	0	1	Yes	0.403775	0.621938	0.661101	0.461436	0.121419	0.124188	0	0.0661091	N/A	No	0.562272	0.122804	Yes	12.1144	-1.9219	0.818161	-2.34905	0.0188214	0.130377	protein_coding	intronic	0	0	0	0	0	0	0	0	0	0	0	0	0	0
wt_saf_neg_peak_126	chr1	3670278	3671371	-	1094	50	65	39	34	21	7	0	2	Yes	1.34592	1.92505	1.17195	0.461436	0.637452	0.217329	0	0.132218	N/A	Yes	1.48097	0.427391	Yes	33.2811	-1.52325	0.520321	-2.92752	0.00341679	0.0407281	protein_coding	UTR5	0	0	0	0	0	0	0	0	0	0	1	0	0	0
wt_saf_neg_peak_134	chr1	4614301	4614991	-	691	19	10	12	4	3	0	0	2	Yes	0.511448	0.296161	0.360601	0.0542865	0.0910646	0	0	0.132218	N/A	Yes	0.389403	0.0455323	Yes	7.82354	-2.83351	1.17677	-2.40787	0.016046	0.11778	other	intronic	0	0	1	0	0	0	0	0	0	0	1	1	0	0
wt_saf_neg_peak_139	chr1	4668017	4668356	-	340	9	8	5	4	0	0	0	0	Yes	0.242265	0.236929	0.15025	0.0542865	0	0	0	0	N/A	Yes	0.209815	0	Yes	3.83988	-4.94506	1.84212	-2.68444	0.00726517	0.0693967	other	intronic	0	0	0	1	0	0	0	0	0	0	0	0	0	0
wt_saf_neg_peak_148	chr1	4702627	4704040	-	1414	31	13	22	21	6	3	0	0	Yes	0.834468	0.38501	0.661101	0.285004	0.182129	0.0931411	0	0	N/A	Yes	0.62686	0.137635	Yes	13.5777	-1.92932	0.796942	-2.4209	0.015482	0.11502	other	intronic	2	1	0	2	0	0	0	0	0	0	0	0	0	0
wt_saf_neg_peak_158	chr1	4724919	4725045	-	127	5	13	3	0	0	0	0	0	Yes	0.134592	0.38501	0.0901502	0	0	0	0	0	N/A	Yes	0.20325	0	Yes	3.6783	-4.88224	1.89798	-2.57234	0.0101015	0.0869097	other	intronic	0	0	0	0	0	0	0	0	0	0	0	0	0	0
wt_saf_neg_peak_188	chr1	4817306	4817629	-	324	17	10	5	0	0	0	0	4	Yes	0.457612	0.296161	0.15025	0	0	0	0	0.264436	N/A	Yes	0.301341	0	Yes	5.5235	-5.47188	1.75232	-3.12266	0.00179227	0.0250485	other	intronic	0	0	0	1	0	0	0	0	0	0	0	0	0	0
wt_saf_neg_peak_203	chr1	4933435	4933584	-	150	4	5	5	1	0	0	0	1	Yes	0.107673	0.148081	0.15025	0.0135716	0	0	0	0.0661091	N/A	Yes	0.135335	0	Yes	2.4801	-4.31084	2.02139	-2.13262	0.0329562	NA	protein_coding	intronic	0	0	0	2	0	0	0	0	0	0	0	0	0	0
wt_saf_neg_peak_217	chr1	4998555	4998898	-	344	15	7	12	9	0	0	0	0	Yes	0.403775	0.207313	0.360601	0.122145	0	0	0	0	N/A	Yes	0.323896	0	Yes	5.97279	-5.58075	1.71917	-3.24618	0.00116965	0.0181121	protein_coding	intronic	0	0	0	1	0	0	0	0	0	0	0	0	0	0
wt_saf_neg_peak_340	chr1	10076185	10076269	-	85	5	6	4	1	0	0	0	1	Yes	0.134592	0.177697	0.1202	0.0135716	0	0	0	0.0661091	N/A	Yes	0.144163	0	Yes	2.63527	-4.40042	1.99245	-2.20855	0.0272058	NA	other	intronic	0	0	0	0	0	0	0	0	0	0	0	1	0	0
wt_saf_neg_peak_342	chr1	10092109	10092407	-	299	47	57	46	6	10	15	0	0	Yes	1.26516	1.68812	1.3823	0.0814298	0.303549	0.465706	0	0	N/A	Yes	1.44519	0.384627	Yes	32.1425	-1.63529	0.499689	-3.27262	0.00106555	0.0168404	other	intronic	0	0	1	1	0	0	0	0	0	0	2	0	0	0
wt_saf_neg_peak_348	chr1	10134524	10134650	-	127	6	16	23	3	0	1	0	3	Yes	0.16151	0.473858	0.691151	0.0407149	0	0.031047	0	0.198327	N/A	Yes	0.442173	0.0155235	Yes	8.34699	-4.57086	1.66162	-2.75085	0.00594406	0.0603799	other	intronic	0	0	0	0	0	0	0	0	0	0	0	0	0	0
wt_saf_neg_peak_355	chr1	10148102	10148176	-	75	8	1	7	0	0	0	0	0	Yes	0.215347	0.0296161	0.21035	0	0	0	0	0	N/A	Yes	0.151771	0	Yes	2.81741	-4.49609	2.03172	-2.21294	0.0269015	NA	protein_coding	intronic	0	0	0	0	0	0	0	0	0	0	0	0	0	0
wt_saf_neg_peak_422	chr1	12773871	12774292	-	422	11	15	12	3	0	1	0	4	Yes	0.296102	0.444242	0.360601	0.0407149	0	0.031047	0	0.264436	N/A	Yes	0.366981	0.0155235	Yes	6.94604	-4.30163	1.6588	-2.59322	0.00950816	0.0834612	other	intronic	0	1	1	0	0	0	0	0	0	0	0	0	0	0
wt_saf_neg_peak_431	chr1	12874102	12874176	-	75	6	5	3	4	0	0	0	0	Yes	0.16151	0.148081	0.0901502	0.0542865	0	0	0	0	N/A	Yes	0.133247	0	Yes	2.43899	-4.29073	2.03435	-2.10914	0.0349324	NA	protein_coding	intronic	0	0	0	0	0	0	0	0	0	0	0	0	0	0
wt_saf_neg_peak_436	chr1	12937937	12939110	-	1174	23	16	25	5	6	2	0	1	Yes	0.619122	0.473858	0.751252	0.0678582	0.182129	0.0620941	0	0.0661091	N/A	Yes	0.614744	0.122112	Yes	13.1004	-2.06917	0.814174	-2.54143	0.01104	0.0922208	protein_coding	intronic	1	1	0	0	0	0	0	0	0	0	0	0	0	0
wt_saf_neg_peak_498	chr1	13202866	13202975	-	110	4	10	9	15	0	0	0	1	Yes	0.107673	0.296161	0.270451	0.203575	0	0	0	0.0661091	N/A	No	0.224762	0	Yes	4.10704	-5.03688	1.83615	-2.74317	0.00608486	0.0613033	protein_coding	intronic	0	0	0	0	0	0	0	0	0	0	0	0	0	0
wt_saf_neg_peak_632	chr1	14194518	14195659	-	1142	19	17	33	21	10	2	0	0	Yes	0.511448	0.503474	0.991652	0.285004	0.303549	0.0620941	0	0	N/A	No	0.668858	0.182821	Yes	14.9833	-1.61175	0.77107	-2.09028	0.0365925	0.203081	protein_coding	intronic	0	1	0	0	0	0	0	0	0	1	2	1	0	0
wt_saf_neg_peak_634	chr1	14197802	14198807	-	1006	20	34	43	20	9	5	0	3	Yes	0.538367	1.00695	1.29215	0.271433	0.273194	0.155235	0	0.198327	N/A	Yes	0.945822	0.214214	Yes	20.4893	-1.87179	0.664789	-2.81562	0.00486835	0.0524492	protein_coding	intronic	0	0	0	0	0	0	0	0	0	0	0	0	0	0
wt_saf_neg_peak_635	chr1	14202377	14203387	-	1011	52	66	58	76	25	13	0	2	Yes	1.39975	1.95466	1.7429	1.03144	0.758871	0.403612	0	0.132218	N/A	No	1.69911	0.581241	Yes	39.622	-1.278	0.449436	-2.84355	0.00446136	0.0492472	protein_coding	intronic	0	2	0	0	0	0	0	0	0	0	0	0	0	0
wt_saf_neg_peak_645	chr1	14227721	14228307	-	587	16	9	15	0	1	1	0	3	Yes	0.430693	0.266545	0.450751	0	0.0303549	0.031047	0	0.198327	N/A	Yes	0.382663	0.0307009	Yes	7.50465	-3.37718	1.30138	-2.59509	0.00945671	0.0831216	protein_coding	intronic	0	0	1	0	0	0	0	0	0	0	1	0	0	0
wt_saf_neg_peak_656	chr1	14254888	14254966	-	79	6	3	5	0	0	0	0	0	Yes	0.16151	0.0888483	0.15025	0	0	0	0	0	N/A	Yes	0.133536	0	Yes	2.46168	-4.30178	2.032	-2.11701	0.0342586	NA	protein_coding	intronic	0	0	0	0	0	0	0	0	0	0	0	1	0	0
wt_saf_neg_peak_663	chr1	14266037	14266172	-	136	3	12	12	21	1	1	0	0	Yes	0.080755	0.355393	0.360601	0.285004	0.0303549	0.031047	0	0	N/A	No	0.265583	0.0307009	Yes	5.30586	-2.83345	1.43347	-1.97664	0.0480825	0.241783	protein_coding	intronic	0	0	0	0	0	0	0	0	0	0	0	0	0	0
wt_saf_neg_peak_664	chr1	14266965	14267355	-	391	15	17	14	9	3	1	0	0	Yes	0.403775	0.503474	0.420701	0.122145	0.0910646	0.031047	0	0	N/A	Yes	0.44265	0.0610558	Yes	8.99521	-2.58624	1.03088	-2.50877	0.0121153	0.0981751	protein_coding	intronic	0	0	0	0	0	0	0	0	0	0	0	0	0	0
wt_saf_neg_peak_673	chr1	14287550	14287624	-	75	2	5	6	0	0	0	0	0	Yes	0.0538367	0.148081	0.1803	0	0	0	0	0	N/A	Yes	0.127406	0	Yes	2.33413	-4.22034	2.07803	-2.03093	0.0422621	NA	protein_coding	intronic	0	0	0	0	0	0	0	0	0	0	0	0	0	0
wt_saf_neg_peak_674	chr1	14288090	14289910	-	1821	95	82	64	37	26	11	0	3	Yes	2.55724	2.42852	1.9232	0.50215	0.789226	0.341517	0	0.198327	N/A	Yes	2.30299	0.565372	Yes	50.4686	-1.76049	0.427818	-4.11504	3.87115e-05	0.00111531	protein_coding	intronic	0	0	0	1	0	0	0	0	0	0	0	0	0	0
wt_saf_neg_peak_843	chr1	16962405	16962678	-	274	7	10	6	0	0	1	0	0	Yes	0.188428	0.296161	0.1803	0	0	0.031047	0	0	N/A	Yes	0.22163	0.0155235	Yes	4.27887	-3.57008	1.78188	-2.00354	0.0451192	0.232157	other	intronic	0	0	0	1	0	0	0	0	0	0	0	1	0	0
wt_saf_neg_peak_844	chr1	16963647	16963893	-	247	8	12	5	0	0	1	0	0	Yes	0.215347	0.355393	0.15025	0	0	0.031047	0	0	N/A	Yes	0.24033	0.0155235	Yes	4.60978	-3.68494	1.76848	-2.08368	0.0371896	0.205212	other	intronic	0	0	0	0	0	0	0	0	0	0	0	0	0	0
wt_saf_neg_peak_850	chr1	16974958	16975151	-	194	5	6	6	0	0	0	0	3	Yes	0.134592	0.177697	0.1803	0	0	0	0	0.198327	N/A	Yes	0.164196	0	Yes	3.00942	-4.5901	1.93268	-2.375	0.0175492	0.124878	other	intronic	0	0	0	0	0	0	0	0	0	0	0	0	0	0
wt_saf_neg_peak_852	chr1	16980351	16980594	-	244	4	7	11	0	0	0	0	1	Yes	0.107673	0.207313	0.330551	0	0	0	0	0.0661091	N/A	Yes	0.215179	0	Yes	3.954	-4.9806	1.85264	-2.68838	0.00717994	0.0688089	other	intronic	0	0	0	0	0	0	0	0	0	0	0	0	0	0
wt_saf_neg_peak_900	chr1	17713053	17713644	-	592	11	10	14	5	0	0	0	3	Yes	0.296102	0.296161	0.420701	0.0678582	0	0	0	0.198327	N/A	Yes	0.337655	0	Yes	6.20805	-5.63427	1.70253	-3.30935	0.000935139	0.0152276	lncRNA	intronic	0	0	1	0	0	0	0	0	0	0	1	0	0	0
wt_saf_neg_peak_937	chr1	20161986	20162585	-	600	12	21	10	1	1	0	0	4	Yes	0.32302	0.621938	0.300501	0.0135716	0.0303549	0	0	0.264436	N/A	Yes	0.415153	0.0151774	Yes	7.77845	-4.48138	1.64845	-2.71853	0.00655719	0.0646189	protein_coding	intronic	0	1	0	0	0	0	0	0	0	0	0	0	0	0
wt_saf_neg_peak_1000	chr1	20393618	20393724	-	107	9	6	5	1	0	0	0	0	Yes	0.242265	0.177697	0.15025	0.0135716	0	0	0	0	N/A	Yes	0.190071	0	Yes	3.48842	-4.8067	1.8771	-2.5607	0.0104462	0.0888488	protein_coding	intronic	0	0	0	1	0	0	0	0	0	0	0	0	0	0
wt_saf_neg_peak_1087	chr1	21721638	21721795	-	158	10	4	8	0	0	0	0	4	Yes	0.269183	0.118464	0.240401	0	0	0	0	0.264436	N/A	Yes	0.209349	0	Yes	3.86471	-4.95269	1.85142	-2.67507	0.00747137	0.0707559	protein_coding	intronic	0	0	0	0	0	0	0	0	0	0	0	0	0	0
wt_saf_neg_peak_1098	chr1	21795544	21795753	-	210	12	17	8	5	0	2	0	3	Yes	0.32302	0.503474	0.240401	0.0678582	0	0.0620941	0	0.198327	N/A	Yes	0.355631	0.031047	Yes	6.94922	-3.24419	1.3359	-2.42846	0.0151629	0.1136	protein_coding	intronic	0	0	0	0	0	0	0	0	0	0	0	0	0	0
wt_saf_neg_peak_1118	chr1	21855708	21856053	-	346	14	16	13	2	4	2	0	0	Yes	0.376857	0.473858	0.390651	0.0271433	0.121419	0.0620941	0	0	N/A	Yes	0.413788	0.0917567	Yes	8.91855	-1.9024	0.940864	-2.02197	0.0431796	0.225979	protein_coding	intronic	0	0	0	0	0	0	0	0	0	0	0	1	0	0
wt_saf_neg_peak_1123	chr1	21867279	21867512	-	234	5	2	7	7	0	0	0	0	Yes	0.134592	0.0592322	0.21035	0.0950014	0	0	0	0	N/A	No	0.134725	0	Yes	2.49358	-4.31737	2.04868	-2.10739	0.035084	NA	protein_coding	intronic	0	0	0	0	0	0	0	0	0	0	0	0	0	0
wt_saf_neg_peak_1128	chr1	21880181	21880356	-	176	6	3	8	0	0	0	0	3	Yes	0.16151	0.0888483	0.240401	0	0	0	0	0.198327	N/A	Yes	0.163586	0	Yes	3.0229	-4.59546	1.95046	-2.35609	0.0184686	0.128769	protein_coding	intronic	0	1	0	0	0	0	0	0	0	0	0	0	0	0
wt_saf_neg_peak_1137	chr1	21909458	21909878	-	421	8	5	14	19	0	0	0	0	Yes	0.215347	0.148081	0.420701	0.257861	0	0	0	0	N/A	No	0.261376	0	Yes	4.82984	-5.27028	1.79036	-2.9437	0.00324312	0.0392097	protein_coding	intronic	0	1	1	1	0	0	0	0	0	0	0	0	0	0
wt_saf_neg_peak_1408	chr1	25733483	25734106	-	624	4	17	7	1	0	2	0	1	Yes	0.107673	0.503474	0.21035	0.0135716	0	0.0620941	0	0.0661091	N/A	Yes	0.273833	0.031047	Yes	5.42999	-2.85256	1.44957	-1.96787	0.0490834	0.245045	protein_coding	intronic	0	0	1	0	0	0	0	0	0	0	0	1	0	0
wt_saf_neg_peak_1415	chr1	25771104	25771553	-	450	6	10	10	8	0	1	0	0	Yes	0.16151	0.296161	0.300501	0.108573	0	0.031047	0	0	N/A	Yes	0.252724	0.0155235	Yes	4.86065	-3.76146	1.74914	-2.15046	0.0315192	0.183976	protein_coding	intronic	0	0	0	0	0	0	0	0	0	0	0	0	0	0
wt_saf_neg_peak_1533	chr1	33524316	33524467	-	152	7	6	5	5	0	0	0	0	Yes	0.188428	0.177697	0.15025	0.0678582	0	0	0	0	N/A	Yes	0.172125	0	Yes	3.15538	-4.66077	1.91204	-2.4376	0.0147853	0.111704	protein_coding	intronic	0	0	0	1	0	0	0	0	0	0	0	0	0	0
wt_saf_neg_peak_1590	chr1	33633692	33634079	-	388	13	12	7	12	1	2	0	2	Yes	0.349938	0.355393	0.21035	0.16286	0.0303549	0.0620941	0	0.132218	N/A	Yes	0.305227	0.0462245	Yes	6.26918	-2.45225	1.20803	-2.02996	0.0423603	0.223121	protein_coding	intronic	0	1	0	1	0	0	0	0	0	0	0	0	0	0
wt_saf_neg_peak_1616	chr1	33768245	33768319	-	75	8	14	6	2	0	2	0	0	Yes	0.215347	0.414626	0.1803	0.0271433	0	0.0620941	0	0	N/A	Yes	0.270091	0.031047	Yes	5.38181	-2.8418	1.41612	-2.00676	0.0447757	0.230975	protein_coding	intronic	0	0	0	0	0	0	0	0	0	0	0	1	0	0
wt_saf_neg_peak_1640	chr1	33868417	33868732	-	316	9	6	1	7	0	0	0	2	Yes	0.242265	0.177697	0.0300501	0.0950014	0	0	0	0.132218	N/A	No	0.150004	0	Yes	2.74013	-4.4621	2.04133	-2.18588	0.0288244	NA	protein_coding	intronic	0	0	0	1	0	0	0	0	0	0	0	1	0	0
wt_saf_neg_peak_1644	chr1	33875004	33875092	-	89	7	2	5	0	0	0	0	4	Yes	0.188428	0.0592322	0.15025	0	0	0	0	0.264436	N/A	Yes	0.132637	0	Yes	2.45247	-4.29718	2.05295	-2.09317	0.0363337	NA	protein_coding	intronic	0	1	0	0	0	0	0	0	0	0	0	0	0	0
wt_saf_neg_peak_1645	chr1	33878222	33878402	-	181	8	5	7	4	0	0	0	1	Yes	0.215347	0.148081	0.21035	0.0542865	0	0	0	0.0661091	N/A	Yes	0.191259	0	Yes	3.52032	-4.81763	1.87272	-2.57253	0.0100958	0.086872	protein_coding	UTR5	0	0	0	0	0	0	0	0	0	0	0	0	0	0
wt_saf_neg_peak_1647	chr1	33885589	33885881	-	293	13	14	3	3	0	1	0	4	Yes	0.349938	0.414626	0.0901502	0.0407149	0	0.031047	0	0.264436	N/A	Yes	0.284905	0.0155235	Yes	5.41968	-3.93282	1.75267	-2.2439	0.0248387	0.156879	protein_coding	intronic	1	2	0	0	0	0	0	0	0	0	0	0	0	0
wt_saf_neg_peak_1649	chr1	33897736	33897882	-	147	8	8	7	5	1	0	0	3	Yes	0.215347	0.236929	0.21035	0.0678582	0.0303549	0	0	0.198327	N/A	Yes	0.220875	0.0151774	Yes	4.26667	-3.58123	1.77884	-2.01324	0.0440899	0.22885	protein_coding	intronic	0	0	0	1	0	0	0	0	0	0	0	0	0	0
wt_saf_neg_peak_1654	chr1	33904758	33904998	-	241	6	12	14	11	1	2	0	2	Yes	0.16151	0.355393	0.420701	0.149288	0.0303549	0.0620941	0	0.132218	N/A	Yes	0.312535	0.0462245	Yes	6.41306	-2.48207	1.21823	-2.03744	0.0416056	0.220426	protein_coding	intronic	0	0	0	0	0	0	0	0	0	0	0	0	0	0
wt_saf_neg_peak_1656	chr1	33907095	33907265	-	171	3	11	6	8	0	0	0	3	Yes	0.080755	0.325777	0.1803	0.108573	0	0	0	0.198327	N/A	No	0.195611	0	Yes	3.55502	-4.8298	1.90029	-2.5416	0.0110345	0.0921863	protein_coding	intronic	0	0	0	0	0	0	0	0	0	0	0	0	0	0
wt_saf_neg_peak_1862	chr1	36466382	36466705	-	324	17	10	10	0	0	3	0	3	Yes	0.457612	0.296161	0.300501	0	0	0.0931411	0	0.198327	N/A	Yes	0.351424	0.0465706	Yes	7.15936	-2.65069	1.19701	-2.21442	0.0267998	0.165161	other	intronic	0	0	1	0	0	0	0	0	0	0	1	1	0	0
wt_saf_neg_peak_1868	chr1	36537203	36537279	-	77	10	11	6	2	0	2	0	1	Yes	0.269183	0.325777	0.1803	0.0271433	0	0.0620941	0	0.0661091	N/A	Yes	0.25842	0.031047	Yes	5.18766	-2.78463	1.41718	-1.96491	0.0494246	0.246065	protein_coding	intronic	0	0	0	0	0	0	0	0	0	0	0	1	0	0
wt_saf_neg_peak_1885	chr1	36573776	36574066	-	291	11	3	6	6	0	0	0	0	Yes	0.296102	0.0888483	0.1803	0.0814298	0	0	0	0	N/A	Yes	0.188417	0	Yes	3.48135	-4.80401	1.90307	-2.52435	0.0115912	0.0953277	protein_coding	intronic	0	0	0	0	0	0	0	0	0	0	0	0	0	0
wt_saf_neg_peak_1928	chr1	36679802	36679943	-	142	18	11	18	17	1	3	0	3	Yes	0.48453	0.325777	0.540901	0.230718	0.0303549	0.0931411	0	0.198327	N/A	Yes	0.450403	0.061748	Yes	9.21737	-2.60292	1.0333	-2.51902	0.0117681	0.0963292	protein_coding	intronic	0	1	0	0	0	0	0	0	0	0	0	0	0	0
wt_saf_neg_peak_2060	chr1	37508697	37508793	-	97	9	5	7	3	0	0	0	0	Yes	0.242265	0.148081	0.21035	0.0407149	0	0	0	0	N/A	Yes	0.200232	0	Yes	3.68684	-4.88491	1.85759	-2.6297	0.00854592	0.0776483	protein_coding	intronic	0	0	0	0	0	0	0	0	0	0	0	0	0	0
wt_saf_neg_peak_2098	chr1	37884371	37884445	-	75	8	5	3	4	0	0	0	0	Yes	0.215347	0.148081	0.0901502	0.0542865	0	0	0	0	N/A	Yes	0.151192	0	Yes	2.77203	-4.47662	1.98214	-2.25848	0.0239155	NA	protein_coding	intronic	0	0	0	0	0	0	0	0	0	0	0	0	0	0
wt_saf_neg_peak_2177	chr1	38195573	38195835	-	263	14	6	10	2	0	0	0	0	Yes	0.376857	0.177697	0.300501	0.0271433	0	0	0	0	N/A	Yes	0.285018	0	Yes	5.25639	-5.39701	1.75375	-3.07741	0.00208808	0.0281625	protein_coding	intronic	0	1	0	0	0	0	0	0	0	0	0	0	0	0
wt_saf_neg_peak_2181	chr1	38203809	38203906	-	98	7	13	4	13	0	1	0	2	Yes	0.188428	0.38501	0.1202	0.176431	0	0.031047	0	0.132218	N/A	No	0.231213	0.0155235	Yes	4.43191	-3.62483	1.79201	-2.02277	0.043097	0.225712	protein_coding	exonic	0	0	0	0	0	0	0	0	0	0	0	0	0	0
wt_saf_neg_peak_2210	chr1	38278061	38278372	-	312	13	10	10	3	0	3	0	3	Yes	0.349938	0.296161	0.300501	0.0407149	0	0.0931411	0	0.198327	N/A	Yes	0.315533	0.0465706	Yes	6.49329	-2.49156	1.22005	-2.04218	0.0411333	0.218788	protein_coding	intronic	0	0	0	1	0	0	0	0	0	0	0	0	0	0
wt_saf_neg_peak_2214	chr1	38284755	38285478	-	724	27	24	25	22	5	5	0	2	Yes	0.726795	0.710787	0.751252	0.298576	0.151774	0.155235	0	0.132218	N/A	Yes	0.729611	0.153505	Yes	15.6537	-1.98028	0.71836	-2.75667	0.0058393	0.0596366	protein_coding	intronic	0	0	0	0	0	0	0	0	0	0	0	0	0	0
wt_saf_neg_peak_2215	chr1	38290350	38290672	-	323	13	6	5	1	0	1	0	0	Yes	0.349938	0.177697	0.15025	0.0135716	0	0.031047	0	0	N/A	Yes	0.225962	0.0155235	Yes	4.388	-3.61222	1.78728	-2.02107	0.0432723	0.226273	protein_coding	intronic	0	0	0	0	0	0	0	0	0	0	0	0	0	0
wt_saf_neg_peak_2227	chr1	38317145	38317657	-	513	29	19	15	19	2	3	0	0	Yes	0.780632	0.562706	0.450751	0.257861	0.0607097	0.0931411	0	0	N/A	Yes	0.59803	0.0769254	Yes	12.1129	-2.69301	0.913188	-2.94902	0.00318781	0.0386877	protein_coding	intronic	0	0	0	2	0	0	0	0	0	0	0	0	0	0
wt_saf_neg_peak_2230	chr1	38327092	38327190	-	99	3	6	10	0	0	0	0	1	Yes	0.080755	0.177697	0.300501	0	0	0	0	0.0661091	N/A	Yes	0.186317	0	Yes	3.42467	-4.77266	1.91281	-2.4951	0.0125921	0.100583	protein_coding	intronic	0	0	0	0	0	0	0	0	0	0	0	1	0	0
wt_saf_neg_peak_2233	chr1	38330523	38330637	-	115	8	12	12	6	0	2	0	0	Yes	0.215347	0.355393	0.360601	0.0814298	0	0.0620941	0	0	N/A	Yes	0.310447	0.031047	Yes	6.15279	-3.05056	1.36457	-2.23555	0.025381	0.159186	protein_coding	intronic	0	0	0	1	0	0	0	0	0	0	0	1	0	0
wt_saf_neg_peak_2236	chr1	38335497	38335676	-	180	4	5	7	1	0	0	0	1	Yes	0.107673	0.148081	0.21035	0.0135716	0	0	0	0.0661091	N/A	Yes	0.155368	0	Yes	2.85424	-4.51191	1.9634	-2.29801	0.0215614	NA	protein_coding	intronic	0	0	0	0	0	0	0	0	0	0	0	1	0	0
wt_saf_neg_peak_2239	chr1	38342243	38342853	-	611	6	8	19	1	2	1	0	1	Yes	0.16151	0.236929	0.570951	0.0135716	0.0607097	0.031047	0	0.0661091	N/A	Yes	0.32313	0.0458784	Yes	6.63118	-2.54946	1.23427	-2.06556	0.0388699	0.211117	protein_coding	intronic	0	0	0	0	0	0	0	0	0	0	0	0	0	0
wt_saf_neg_peak_2241	chr1	38344058	38344725	-	668	15	12	16	23	4	2	0	3	Yes	0.403775	0.355393	0.480801	0.312148	0.121419	0.0620941	0	0.198327	N/A	No	0.413323	0.0917567	Yes	8.94337	-1.90615	0.94312	-2.02111	0.0432685	0.226271	protein_coding	intronic	0	0	0	0	0	0	0	0	0	0	0	0	0	0
wt_saf_neg_peak_2254	chr1	38383953	38384029	-	77	10	1	5	7	0	0	0	0	Yes	0.269183	0.0296161	0.15025	0.0950014	0	0	0	0	N/A	No	0.149683	0	Yes	2.7763	-4.47796	2.04483	-2.18989	0.0285319	NA	protein_coding	intronic	0	0	0	1	0	0	0	0	0	0	0	0	0	0
wt_saf_neg_peak_2263	chr1	38409733	38409809	-	77	7	5	5	0	0	0	0	0	Yes	0.188428	0.148081	0.15025	0	0	0	0	0	N/A	Yes	0.162253	0	Yes	2.97965	-4.57811	1.93687	-2.36366	0.0180953	0.127234	protein_coding	intronic	0	0	0	0	0	0	0	0	0	0	0	0	0	0
wt_saf_neg_peak_2268	chr1	38440222	38440501	-	280	9	16	12	14	0	3	0	0	Yes	0.242265	0.473858	0.360601	0.190003	0	0.0931411	0	0	N/A	No	0.358908	0.0465706	Yes	7.25573	-2.66853	1.19627	-2.23071	0.0257006	0.160458	protein_coding	intronic	0	0	0	0	0	0	0	0	0	0	0	0	0	0
wt_saf_neg_peak_2281	chr1	38460501	38461217	-	717	52	27	42	66	8	14	0	2	Yes	1.39975	0.799635	1.2621	0.895728	0.242839	0.434659	0	0.132218	N/A	No	1.15383	0.338749	Yes	26.2831	-1.50317	0.564551	-2.6626	0.00775395	0.0725652	protein_coding	intronic	0	0	0	0	0	0	0	0	0	0	0	0	0	0
wt_saf_neg_peak_2326	chr1	38560948	38561087	-	140	12	6	18	3	0	0	0	0	Yes	0.32302	0.177697	0.540901	0.0407149	0	0	0	0	N/A	Yes	0.347206	0	Yes	6.41995	-5.68161	1.71839	-3.30637	0.000945148	0.0153457	protein_coding	intronic	0	0	0	0	0	0	0	0	0	0	0	0	0	0
wt_saf_neg_peak_2365	chr1	38829117	38830297	-	1181	12	22	16	6	1	0	0	4	Yes	0.32302	0.651555	0.480801	0.0814298	0.0303549	0	0	0.264436	N/A	Yes	0.485125	0.0151774	Yes	9.07662	-4.7078	1.61822	-2.90925	0.00362295	0.042491	protein_coding	intronic	0	1	0	0	0	0	0	0	0	0	0	1	0	0
wt_saf_neg_peak_2384	chr1	39373367	39373698	-	332	12	17	14	5	1	4	0	2	Yes	0.32302	0.503474	0.420701	0.0678582	0.0303549	0.124188	0	0.132218	N/A	Yes	0.415732	0.0772715	Yes	8.75783	-2.15121	0.996969	-2.15775	0.0309475	0.181883	protein_coding	UTR3	0	0	0	0	0	0	0	0	0	0	0	0	0	0
wt_saf_neg_peak_2502	chr1	43064000	43064103	-	104	8	15	14	9	0	1	0	1	Yes	0.215347	0.444242	0.420701	0.122145	0	0.031047	0	0.0661091	N/A	Yes	0.360096	0.0155235	Yes	6.82063	-4.27234	1.67158	-2.55587	0.0105924	0.0897125	protein_coding	intronic	0	0	0	0	0	0	0	0	0	0	0	0	0	0
wt_saf_neg_peak_2527	chr1	43150363	43151285	-	923	19	12	22	15	1	1	0	3	Yes	0.511448	0.355393	0.661101	0.203575	0.0303549	0.031047	0	0.198327	N/A	Yes	0.509314	0.0307009	Yes	9.84092	-3.78893	1.24757	-3.03704	0.00238915	0.0311375	protein_coding	intronic	0	0	0	1	0	0	0	0	0	0	0	1	0	0
wt_saf_neg_peak_2536	chr1	43162372	43163165	-	794	8	13	19	3	1	2	0	2	Yes	0.215347	0.38501	0.570951	0.0407149	0.0303549	0.0620941	0	0.132218	N/A	Yes	0.390436	0.0462245	Yes	7.8572	-2.80688	1.16519	-2.40894	0.0159988	0.117585	protein_coding	intronic	0	0	0	0	0	0	0	0	0	0	0	1	0	0
wt_saf_neg_peak_2540	chr1	43739404	43739606	-	203	6	2	12	2	0	0	0	0	Yes	0.16151	0.0592322	0.360601	0.0271433	0	0	0	0	N/A	Yes	0.193781	0	Yes	3.59547	-4.84362	1.9223	-2.5197	0.0117454	0.0961894	other	intronic	0	0	0	0	0	0	0	0	0	0	0	0	0	0
wt_saf_neg_peak_2541	chr1	43740191	43740323	-	133	9	6	5	0	0	0	0	0	Yes	0.242265	0.177697	0.15025	0	0	0	0	0	N/A	Yes	0.190071	0	Yes	3.48842	-4.8067	1.8771	-2.5607	0.0104462	0.0888488	other	intronic	0	0	0	0	0	0	0	0	0	0	0	0	0	0
wt_saf_neg_peak_2580	chr1	43922965	43923268	-	304	7	5	10	7	0	0	0	3	Yes	0.188428	0.148081	0.300501	0.0950014	0	0	0	0.198327	N/A	No	0.212337	0	Yes	3.91503	-4.96838	1.8429	-2.69596	0.00701867	0.0677482	other	intronic	0	2	0	0	0	0	0	0	0	0	0	0	0	0
wt_saf_neg_peak_2581	chr1	43933358	43933739	-	382	9	7	8	2	0	0	0	2	Yes	0.242265	0.207313	0.240401	0.0271433	0	0	0	0.132218	N/A	Yes	0.229993	0	Yes	4.22537	-5.08097	1.80559	-2.81402	0.00489267	0.0526281	other	intronic	0	0	0	0	0	0	0	0	0	0	0	0	0	0
wt_saf_neg_peak_2616	chr1	44511629	44511737	-	109	33	16	22	7	6	2	0	1	Yes	0.888305	0.473858	0.661101	0.0950014	0.182129	0.0620941	0	0.0661091	N/A	Yes	0.674421	0.122112	Yes	14.2044	-2.20597	0.80459	-2.74173	0.0061117	0.0614965	other	intronic	0	0	1	0	0	0	0	0	0	0	1	0	0	0
wt_saf_neg_peak_2654	chr1	45441227	45441464	-	238	16	1	6	5	0	0	0	1	Yes	0.430693	0.0296161	0.1803	0.0678582	0	0	0	0.0661091	N/A	Yes	0.213537	0	Yes	3.96249	-4.99226	1.93184	-2.58419	0.00976067	0.0849989	protein_coding	intronic	0	0	0	0	0	0	0	0	0	0	0	1	0	0
wt_saf_neg_peak_2882	chr1	52844007	52844475	-	469	11	23	9	3	1	0	0	1	Yes	0.296102	0.681171	0.270451	0.0407149	0.0303549	0	0	0.0661091	N/A	Yes	0.415908	0.0151774	Yes	7.77631	-4.48116	1.65721	-2.70404	0.0068502	0.066628	other	intronic	0	1	0	0	0	0	0	0	0	0	0	0	0	0
wt_saf_neg_peak_2891	chr1	52905689	52905946	-	258	19	46	35	19	3	4	0	2	Yes	0.511448	1.36234	1.05175	0.257861	0.0910646	0.124188	0	0.132218	N/A	Yes	0.975181	0.107626	Yes	19.3865	-2.90081	0.779631	-3.72075	0.000198632	0.004384	other	intronic	0	0	0	1	0	0	0	0	0	0	0	0	0	0
wt_saf_neg_peak_2895	chr1	52913272	52913544	-	273	22	8	22	12	3	1	0	3	Yes	0.592203	0.236929	0.661101	0.16286	0.0910646	0.031047	0	0.198327	N/A	Yes	0.496745	0.0610558	Yes	10.0759	-2.76637	1.04079	-2.65794	0.00786196	0.0732968	other	intronic	0	1	0	0	0	0	0	0	0	0	0	0	0	0
wt_saf_neg_peak_2964	chr1	53260734	53260810	-	77	22	15	16	13	4	5	0	0	Yes	0.592203	0.444242	0.480801	0.176431	0.121419	0.155235	0	0	N/A	Yes	0.505749	0.138327	Yes	11.3367	-1.60401	0.811115	-1.97754	0.0479806	0.241455	protein_coding	intronic	0	0	0	1	0	0	0	0	0	0	0	0	0	0
wt_saf_neg_peak_2982	chr1	53310830	53311175	-	346	5	5	4	0	0	0	0	3	Yes	0.134592	0.148081	0.1202	0	0	0	0	0.198327	N/A	Yes	0.134291	0	Yes	2.45954	-4.30084	2.02343	-2.12552	0.0335435	NA	other	intronic	0	0	0	0	0	0	0	0	0	0	0	0	0	0
wt_saf_neg_peak_3001	chr1	53594281	53594483	-	203	16	8	5	1	1	1	0	0	Yes	0.430693	0.236929	0.15025	0.0135716	0.0303549	0.031047	0	0	N/A	Yes	0.272624	0.0307009	Yes	5.45818	-2.88807	1.40169	-2.06042	0.039358	0.212925	protein_coding	intronic	1	0	0	1	0	0	0	0	0	0	0	0	0	0
wt_saf_neg_peak_3024	chr1	53704339	53704501	-	163	6	7	2	0	0	0	0	0	Yes	0.16151	0.207313	0.0601001	0	0	0	0	0	N/A	Yes	0.142974	0	Yes	2.60337	-4.38568	2.02374	-2.16711	0.0302263	NA	protein_coding	intronic	0	0	0	0	0	0	0	0	0	0	0	2	0	0
wt_saf_neg_peak_3035	chr1	53735465	53735916	-	452	14	18	15	4	4	2	1	0	Yes	0.376857	0.53309	0.450751	0.0542865	0.121419	0.0620941	0.0696843	0	N/A	Yes	0.453566	0.0917567	Yes	9.64415	-2.03345	0.922193	-2.20501	0.0274531	0.167928	other	intronic	0	0	0	2	0	0	0	0	0	0	0	0	0	0
wt_saf_neg_peak_3064	chr1	53814042	53814283	-	242	7	8	2	10	0	0	0	1	Yes	0.188428	0.236929	0.0601001	0.135716	0	0	0	0.0661091	N/A	No	0.161819	0	Yes	2.94562	-4.56418	1.9744	-2.31168	0.0207956	0.139052	protein_coding	intronic	0	0	0	0	0	0	0	0	0	0	0	0	0	0
wt_saf_neg_peak_3080	chr1	53846287	53846368	-	82	6	8	3	0	0	0	0	0	Yes	0.16151	0.236929	0.0901502	0	0	0	0	0	N/A	Yes	0.162863	0	Yes	2.96617	-4.57271	1.95393	-2.34026	0.0192701	0.132319	protein_coding	intronic	0	0	0	0	0	0	0	0	0	0	0	0	0	0
wt_saf_neg_peak_3081	chr1	53848892	53849456	-	565	11	7	17	13	0	3	0	4	Yes	0.296102	0.207313	0.510851	0.176431	0	0.0931411	0	0.264436	N/A	No	0.338089	0.0465706	Yes	6.94258	-2.59523	1.22498	-2.11859	0.0341251	0.194028	protein_coding	intronic	0	1	0	0	0	0	0	0	0	0	1	1	0	0
wt_saf_neg_peak_3090	chr1	53937052	53937131	-	80	5	11	1	7	0	0	2	0	Yes	0.134592	0.325777	0.0300501	0.0950014	0	0	0.139369	0	N/A	No	0.163473	0	Yes	2.95269	-4.56692	2.0238	-2.2566	0.0240329	0.153406	protein_coding	exonic	0	0	0	0	0	0	0	0	0	0	0	0	0	0
wt_saf_neg_peak_3137	chr1	54373065	54373192	-	128	3	12	6	2	0	0	0	2	Yes	0.080755	0.355393	0.1803	0.0271433	0	0	0	0.132218	N/A	Yes	0.205483	0	Yes	3.73075	-4.89956	1.88752	-2.59577	0.00943791	0.0830076	other	intronic	0	0	0	0	0	0	0	0	0	0	0	0	0	0
wt_saf_neg_peak_3143	chr1	54394866	54395352	-	487	12	18	20	19	3	5	0	2	Yes	0.32302	0.53309	0.601001	0.257861	0.0910646	0.155235	0	0.132218	N/A	Yes	0.485704	0.12315	Yes	10.7278	-1.70468	0.85634	-1.99065	0.0465189	0.23662	other	intronic	0	0	0	0	0	0	0	0	0	0	0	1	0	0
wt_saf_neg_peak_3165	chr1	54464695	54465236	-	542	9	10	18	8	4	0	0	1	Yes	0.242265	0.296161	0.540901	0.108573	0.121419	0	0	0.0661091	N/A	Yes	0.359776	0.0607097	Yes	7.49995	-2.30356	1.13915	-2.02218	0.0431576	0.22591	other	intronic	0	1	0	1	0	0	0	0	0	0	0	0	0	0
wt_saf_neg_peak_3173	chr1	54486839	54486916	-	78	19	18	19	9	1	5	0	2	Yes	0.511448	0.53309	0.570951	0.122145	0.0303549	0.155235	0	0.132218	N/A	Yes	0.538497	0.092795	Yes	11.2681	-2.26559	0.897607	-2.52404	0.0116016	0.095382	protein_coding	intronic	0	0	0	0	0	0	0	0	0	0	0	1	0	0
wt_saf_neg_peak_3269	chr1	55235206	55235415	-	210	7	5	3	0	0	0	0	0	Yes	0.188428	0.148081	0.0901502	0	0	0	0	0	N/A	Yes	0.14222	0	Yes	2.60551	-4.38668	2.0062	-2.18656	0.0287745	NA	other	intronic	0	0	0	1	0	0	0	0	0	0	0	0	0	0
wt_saf_neg_peak_3274	chr1	55276605	55277069	-	465	16	10	14	5	0	3	0	0	Yes	0.430693	0.296161	0.420701	0.0678582	0	0.0931411	0	0	N/A	Yes	0.382518	0.0465706	Yes	7.74114	-2.77396	1.17178	-2.3673	0.0179185	0.126434	other	intronic	0	0	1	0	0	0	0	0	0	0	0	0	0	0
wt_saf_neg_peak_3277	chr1	55296045	55296245	-	201	5	5	4	0	0	0	0	0	Yes	0.134592	0.148081	0.1202	0	0	0	0	0	N/A	Yes	0.134291	0	Yes	2.45954	-4.30084	2.02343	-2.12552	0.0335435	NA	other	intronic	0	0	0	1	0	0	0	0	0	0	0	1	0	0
wt_saf_neg_peak_3284	chr1	55354170	55354271	-	102	15	5	2	0	0	0	0	3	Yes	0.403775	0.148081	0.0601001	0	0	0	0	0.198327	N/A	Yes	0.203985	0	Yes	3.75059	-4.91562	1.91483	-2.56713	0.0102544	0.0877601	protein_coding	intronic	0	0	0	1	0	0	0	0	0	0	0	0	0	0
wt_saf_neg_peak_3285	chr1	55354988	55355133	-	146	11	10	7	0	0	2	0	0	Yes	0.296102	0.296161	0.21035	0	0	0.0620941	0	0	N/A	Yes	0.267538	0.031047	Yes	5.36552	-2.8383	1.40176	-2.02482	0.0428861	0.224966	protein_coding	intronic	0	0	0	1	0	0	0	0	0	0	0	0	0	0
wt_saf_neg_peak_3291	chr1	56479963	56480380	-	418	9	11	4	6	0	0	0	2	Yes	0.242265	0.325777	0.1202	0.0814298	0	0	0	0.132218	N/A	Yes	0.229414	0	Yes	4.17999	-5.06798	1.82684	-2.77417	0.00553424	0.0573816	other	intronic	0	0	0	0	0	0	0	0	0	0	0	0	0	0
wt_saf_neg_peak_3398	chr1	57398267	57398692	-	426	13	6	4	0	1	0	0	0	Yes	0.349938	0.177697	0.1202	0	0.0303549	0	0	0	N/A	Yes	0.215945	0.0151774	Yes	4.18659	-3.5576	1.80957	-1.966	0.0492991	0.245732	protein_coding	intronic	0	0	0	0	0	0	0	0	0	0	0	0	0	0
wt_saf_neg_peak_3417	chr1	57985533	57986004	-	472	12	5	11	0	0	2	0	2	Yes	0.32302	0.148081	0.330551	0	0	0.0620941	0	0.132218	N/A	Yes	0.267217	0.031047	Yes	5.4017	-2.84637	1.41709	-2.0086	0.0445793	0.230396	other	intronic	0	0	0	2	0	0	0	0	0	0	0	0	0	0
wt_saf_neg_peak_3488	chr1	58518419	58518695	-	277	5	6	2	0	0	0	0	3	Yes	0.134592	0.177697	0.0601001	0	0	0	0	0.198327	N/A	Yes	0.124129	0	Yes	2.26112	-4.18188	2.08705	-2.00373	0.0450988	NA	other	intronic	0	0	0	1	0	0	0	0	0	0	0	0	0	0
wt_saf_neg_peak_3505	chr1	58560064	58560283	-	220	7	3	5	5	0	0	0	0	Yes	0.188428	0.0888483	0.15025	0.0678582	0	0	0	0	N/A	Yes	0.142509	0	Yes	2.6282	-4.39704	2.00421	-2.1939	0.0282424	NA	protein_coding	intronic	0	0	0	1	0	0	0	0	0	0	0	0	0	0
wt_saf_neg_peak_3516	chr1	58585274	58585654	-	381	11	19	16	13	1	3	0	3	Yes	0.296102	0.562706	0.480801	0.176431	0.0303549	0.0931411	0	0.198327	N/A	Yes	0.446536	0.061748	Yes	9.08341	-2.5781	1.03893	-2.48149	0.0130834	0.103056	protein_coding	intronic	0	0	0	0	0	0	0	0	0	0	0	0	0	0
wt_saf_neg_peak_3521	chr1	58739074	58739217	-	144	15	11	7	1	2	0	0	1	Yes	0.403775	0.325777	0.21035	0.0135716	0.0607097	0	0	0.0661091	N/A	Yes	0.313301	0.0303549	Yes	6.17866	-3.09765	1.37124	-2.25901	0.0238828	0.152744	other	intronic	0	0	1	0	0	0	0	0	0	0	0	1	0	0
wt_saf_neg_peak_3736	chr1	60543317	60543394	-	78	16	11	4	4	0	0	0	0	Yes	0.430693	0.325777	0.1202	0.0542865	0	0	0	0	N/A	Yes	0.292224	0	Yes	5.34563	-5.42483	1.76748	-3.06924	0.00214602	0.0287541	protein_coding	intronic	0	0	0	0	0	0	0	0	0	0	0	0	0	0
wt_saf_neg_peak_3761	chr1	61456300	61456789	-	490	8	10	7	3	0	0	0	2	Yes	0.215347	0.296161	0.21035	0.0407149	0	0	0	0.132218	N/A	Yes	0.240619	0	Yes	4.39897	-5.13926	1.7942	-2.86438	0.00417823	0.0469763	other	intronic	0	0	0	0	0	0	0	0	0	0	0	0	0	0
wt_saf_neg_peak_3776	chr1	62723028	62723373	-	346	8	4	7	0	0	0	0	0	Yes	0.215347	0.118464	0.21035	0	0	0	0	0	N/A	Yes	0.181387	0	Yes	3.34459	-4.7437	1.89815	-2.49912	0.0124502	0.0997604	other	intronic	0	0	0	0	0	0	0	0	0	0	0	0	0	0
wt_saf_neg_peak_3847	chr1	63183634	63183873	-	240	10	13	5	0	2	0	0	2	Yes	0.269183	0.38501	0.15025	0	0.0607097	0	0	0.132218	N/A	Yes	0.268148	0.0303549	Yes	5.32337	-2.86584	1.42562	-2.01025	0.044405	0.229826	protein_coding	exonic	0	0	0	0	0	0	0	0	0	0	0	0	0	0
wt_saf_neg_peak_3880	chr1	63991050	63991337	-	288	5	1	11	0	0	0	0	4	Yes	0.134592	0.0296161	0.330551	0	0	0	0	0.264436	N/A	Yes	0.164919	0	Yes	3.06614	-4.61338	2.01593	-2.28847	0.0221104	0.144828	other	intronic	0	0	0	0	0	0	0	0	0	0	0	0	0	0
wt_saf_neg_peak_3916	chr1	64075987	64076061	-	75	27	9	6	13	1	1	0	0	Yes	0.726795	0.266545	0.1803	0.176431	0.0303549	0.031047	0	0	N/A	No	0.391213	0.0307009	Yes	7.6527	-3.41338	1.34262	-2.54233	0.0110115	0.0920762	protein_coding	intronic	0	0	0	0	0	0	0	0	0	0	0	1	0	0
wt_saf_neg_peak_3958	chr1	64662418	64662545	-	128	5	5	6	2	0	0	0	1	Yes	0.134592	0.148081	0.1803	0.0271433	0	0	0	0.0661091	N/A	Yes	0.154324	0	Yes	2.83369	-4.50316	1.95887	-2.29885	0.0215134	NA	other	intronic	0	0	0	0	1	0	0	0	0	0	0	0	0	0
wt_saf_neg_peak_3963	chr1	64678864	64679246	-	383	13	8	9	13	0	0	0	2	Yes	0.349938	0.236929	0.270451	0.176431	0	0	0	0.132218	N/A	No	0.285773	0	Yes	5.25426	-5.3966	1.74432	-3.09382	0.00197597	0.02703	other	intronic	0	0	0	1	0	0	0	0	0	0	0	0	0	0
wt_saf_neg_peak_3965	chr1	64681437	64682733	-	1297	42	26	27	72	7	14	0	0	Yes	1.13057	0.770019	0.811352	0.977158	0.212484	0.434659	0	0	N/A	No	0.90398	0.323571	Yes	21.4169	-1.21389	0.599012	-2.02648	0.0427155	0.224408	lncRNA	intronic	0	0	0	1	0	0	0	0	0	0	2	3	0	0
wt_saf_neg_peak_3966	chr1	64687302	64687593	-	292	19	7	9	0	0	1	0	2	Yes	0.511448	0.207313	0.270451	0	0	0.031047	0	0.132218	N/A	Yes	0.329737	0.0155235	Yes	6.31115	-4.16159	1.69667	-2.4528	0.0141749	0.108773	lncRNA	intronic	0	0	0	0	0	0	0	0	0	0	0	0	0	0
wt_saf_neg_peak_3997	chr1	64841901	64842028	-	128	6	13	4	14	0	0	0	0	Yes	0.16151	0.38501	0.1202	0.190003	0	0	0	0	N/A	No	0.22224	0	Yes	4.03189	-5.01449	1.8504	-2.70994	0.00672952	0.0658096	protein_coding	intronic	0	0	0	0	0	0	0	0	0	0	0	1	0	0
wt_saf_neg_peak_4001	chr1	64848645	64848884	-	240	7	4	13	3	0	1	0	0	Yes	0.188428	0.118464	0.390651	0.0407149	0	0.031047	0	0	N/A	Yes	0.232515	0.0155235	Yes	4.53402	-3.65349	1.791	-2.03991	0.0413588	0.219555	protein_coding	intronic	0	0	0	0	0	0	0	0	0	0	0	1	0	0
wt_saf_neg_peak_4027	chr1	64905645	64905761	-	117	9	5	2	0	0	0	0	0	Yes	0.242265	0.148081	0.0601001	0	0	0	0	0	N/A	Yes	0.150149	0	Yes	2.75147	-4.46744	2.00628	-2.22673	0.0259655	NA	protein_coding	intronic	0	0	0	0	0	0	0	0	0	0	0	0	0	0
wt_saf_neg_peak_4034	chr1	64916418	64916646	-	229	11	12	5	7	1	0	0	1	Yes	0.296102	0.355393	0.15025	0.0950014	0.0303549	0	0	0.0661091	N/A	Yes	0.267248	0.0151774	Yes	5.095	-3.85217	1.74282	-2.21031	0.0270837	0.166348	protein_coding	intronic	0	0	0	0	0	0	0	0	0	0	0	0	0	0
wt_saf_neg_peak_4050	chr1	65157138	65157512	-	375	45	47	36	15	10	7	0	3	Yes	1.21133	1.39196	1.0818	0.203575	0.303549	0.217329	0	0.198327	N/A	Yes	1.22836	0.260439	Yes	26.3134	-1.96722	0.562028	-3.50021	0.000464896	0.00876974	other	intronic	0	0	1	0	0	0	0	0	0	0	1	1	0	0
wt_saf_neg_peak_4160	chr1	69044485	69044790	-	306	3	10	6	8	0	0	0	0	Yes	0.080755	0.296161	0.1803	0.108573	0	0	0	0	N/A	No	0.185739	0	Yes	3.37929	-4.75648	1.91475	-2.48412	0.0129871	0.102552	protein_coding	intronic	0	1	0	0	0	0	0	0	0	0	0	0	0	0
wt_saf_neg_peak_4164	chr1	69055470	69056611	-	1142	32	27	16	4	3	6	0	0	Yes	0.861387	0.799635	0.480801	0.0542865	0.0910646	0.186282	0	0	N/A	Yes	0.713941	0.138673	Yes	15.125	-2.09296	0.762753	-2.74395	0.00607048	0.0612285	protein_coding	intronic	0	0	0	0	0	0	0	0	0	0	0	1	0	0
wt_saf_neg_peak_4167	chr1	69075694	69075997	-	304	9	6	1	0	0	0	0	0	Yes	0.242265	0.177697	0.0300501	0	0	0	0	0	N/A	Yes	0.150004	0	Yes	2.74013	-4.4621	2.04133	-2.18588	0.0288244	NA	protein_coding	intronic	0	0	0	2	0	0	0	0	0	0	1	0	0	0
wt_saf_neg_peak_4179	chr1	69508479	69508827	-	349	8	9	2	1	0	0	0	1	Yes	0.215347	0.266545	0.0601001	0.0135716	0	0	0	0.0661091	N/A	Yes	0.180664	0	Yes	3.28787	-4.72299	1.93483	-2.44104	0.0146451	0.111075	other	intronic	0	0	1	0	0	0	0	0	0	0	0	0	0	0
wt_saf_neg_peak_4182	chr1	69523942	69524635	-	694	7	23	9	0	1	1	0	2	Yes	0.188428	0.681171	0.270451	0	0.0303549	0.031047	0	0.132218	N/A	Yes	0.380017	0.0307009	Yes	7.34373	-3.3436	1.34019	-2.49487	0.0126005	0.100621	other	intronic	0	1	0	0	0	0	0	0	0	0	1	0	0	0
wt_saf_neg_peak_4196	chr1	69611122	69611355	-	234	3	6	5	2	0	0	0	0	Yes	0.080755	0.177697	0.15025	0.0271433	0	0	0	0	N/A	Yes	0.136234	0	Yes	2.4893	-4.31539	2.02926	-2.12659	0.0334543	NA	protein_coding	intronic	0	0	0	0	0	0	0	0	0	0	0	0	0	0
wt_saf_neg_peak_4198	chr1	69614121	69614291	-	171	7	3	5	0	0	0	0	0	Yes	0.188428	0.0888483	0.15025	0	0	0	0	0	N/A	Yes	0.142509	0	Yes	2.6282	-4.39704	2.00421	-2.1939	0.0282424	NA	protein_coding	intronic	0	0	0	0	0	0	0	0	0	0	0	0	0	0
wt_saf_neg_peak_4227	chr1	71018961	71019231	-	271	4	12	11	11	0	0	0	0	Yes	0.107673	0.355393	0.330551	0.149288	0	0	0	0	N/A	Yes	0.264539	0	Yes	4.83264	-5.27119	1.79426	-2.93781	0.00330534	0.0397817	other	intronic	0	0	0	1	0	0	0	0	0	0	0	0	0	0
wt_saf_neg_peak_4316	chr1	71675700	71675947	-	248	6	5	4	5	0	0	0	0	Yes	0.16151	0.148081	0.1202	0.0678582	0	0	0	0	N/A	Yes	0.143264	0	Yes	2.62606	-4.39617	1.99322	-2.20557	0.0274143	NA	other	intronic	0	0	0	0	0	0	0	0	0	0	0	1	0	0
wt_saf_neg_peak_4354	chr1	72255968	72256227	-	260	5	13	2	17	0	0	0	1	Yes	0.134592	0.38501	0.0601001	0.230718	0	0	0	0.0661091	N/A	No	0.193234	0	Yes	3.49122	-4.80763	1.93544	-2.484	0.0129914	0.102575	other	intronic	0	0	0	0	0	0	0	0	0	0	0	1	0	0
wt_saf_neg_peak_4369	chr1	72343355	72343860	-	506	8	24	3	1	0	3	0	4	Yes	0.215347	0.710787	0.0901502	0.0135716	0	0.0931411	0	0.264436	N/A	Yes	0.338761	0.0465706	Yes	6.81137	-2.5667	1.30828	-1.96189	0.0497758	0.247106	other	intronic	0	1	0	0	0	0	0	0	0	0	0	0	0	0
wt_saf_neg_peak_4505	chr1	74367742	74368030	-	289	4	11	5	6	0	0	0	2	Yes	0.107673	0.325777	0.15025	0.0814298	0	0	0	0.132218	N/A	No	0.194567	0	Yes	3.53447	-4.8227	1.89309	-2.54753	0.010849	0.091148	other	intronic	0	0	0	0	0	0	0	0	0	0	0	0	0	0
wt_saf_neg_peak_4578	chr1	74588456	74588601	-	146	14	15	6	8	0	2	0	3	Yes	0.376857	0.444242	0.1803	0.108573	0	0.0620941	0	0.198327	N/A	Yes	0.3338	0.031047	Yes	6.55665	-3.15492	1.35828	-2.32273	0.0201937	0.136307	other	intronic	0	0	0	0	0	0	0	0	0	0	0	0	0	0
wt_saf_neg_peak_4596	chr1	74783747	74783982	-	236	12	4	7	1	0	0	0	1	Yes	0.32302	0.118464	0.21035	0.0135716	0	0	0	0.0661091	N/A	Yes	0.217278	0	Yes	4.01067	-5.00785	1.84429	-2.71532	0.00662115	0.0650601	other	intronic	0	0	0	0	0	0	0	0	0	0	0	0	0	0
wt_saf_neg_peak_4606	chr1	74966045	74966556	-	512	21	24	16	12	7	4	0	2	Yes	0.565285	0.710787	0.480801	0.16286	0.212484	0.124188	0	0.132218	N/A	Yes	0.585624	0.168336	Yes	13.1757	-1.52774	0.752424	-2.03042	0.0423141	0.222949	other	intronic	0	0	0	0	0	0	0	0	0	0	0	1	0	0
wt_saf_neg_peak_4701	chr1	75714709	75714790	-	82	5	6	3	0	0	0	0	4	Yes	0.134592	0.177697	0.0901502	0	0	0	0	0.264436	N/A	Yes	0.134146	0	Yes	2.4482	-4.29531	2.0334	-2.11237	0.0346543	NA	other	intronic	0	1	0	0	0	0	0	0	0	0	0	0	0	0
wt_saf_neg_peak_4773	chr1	78395826	78396043	-	218	5	4	6	0	0	0	0	0	Yes	0.134592	0.118464	0.1803	0	0	0	0	0	N/A	Yes	0.144452	0	Yes	2.65796	-4.41065	1.99055	-2.2158	0.0267055	NA	other	intronic	0	0	0	0	0	0	0	0	0	0	0	0	0	0
wt_saf_neg_peak_4777	chr1	78407681	78407864	-	184	8	9	8	9	0	0	0	4	Yes	0.215347	0.266545	0.240401	0.122145	0	0	0	0.264436	N/A	No	0.240764	0	Yes	4.41031	-5.14233	1.79152	-2.87038	0.00409983	0.0463866	other	intronic	0	1	0	0	0	0	0	0	0	0	0	0	0	0
wt_saf_neg_peak_4822	chr1	78500710	78501154	-	445	17	9	8	5	1	0	0	4	Yes	0.457612	0.266545	0.240401	0.0678582	0.0303549	0	0	0.264436	N/A	Yes	0.321519	0.0151774	Yes	6.12815	-4.12926	1.69549	-2.43543	0.0148739	0.112122	protein_coding	intronic	0	0	0	1	0	0	0	0	0	0	0	0	0	0
wt_saf_neg_peak_4829	chr1	78568486	78568760	-	275	15	12	5	18	2	0	0	4	Yes	0.403775	0.355393	0.15025	0.244289	0.0607097	0	0	0.264436	N/A	No	0.30314	0.0303549	Yes	5.98024	-3.04864	1.39482	-2.18568	0.0288387	0.173509	other	intronic	0	0	0	0	0	0	0	0	0	0	0	0	0	0
wt_saf_neg_peak_4842	chr1	78602307	78602577	-	271	24	28	23	24	2	1	0	2	Yes	0.64604	0.829251	0.691151	0.325719	0.0607097	0.031047	0	0.132218	N/A	Yes	0.722148	0.0458784	Yes	13.8914	-3.70237	1.0245	-3.61382	0.000301714	0.00618375	lncRNA	intronic	0	0	0	1	0	0	0	0	0	0	0	1	0	0
wt_saf_neg_peak_4914	chr1	79790599	79790799	-	201	11	8	10	3	2	0	0	1	Yes	0.296102	0.236929	0.300501	0.0407149	0.0607097	0	0	0.0661091	N/A	Yes	0.277844	0.0303549	Yes	5.54661	-2.92685	1.39538	-2.09753	0.0359464	0.200772	other	intronic	0	0	0	0	0	0	0	0	0	0	0	1	0	0
wt_saf_neg_peak_5018	chr1	82278563	82278640	-	78	1	6	8	11	0	0	0	0	Yes	0.0269183	0.177697	0.240401	0.149288	0	0	0	0	N/A	No	0.148339	0	Yes	2.71749	-4.43829	2.05224	-2.16265	0.030568	NA	protein_coding	intronic	0	0	0	0	0	0	0	0	0	0	0	0	0	0
wt_saf_neg_peak_5051	chr1	84074602	84075049	-	448	12	11	10	15	1	0	0	0	Yes	0.32302	0.325777	0.300501	0.203575	0.0303549	0	0	0	N/A	No	0.316433	0.0151774	Yes	6.02116	-4.10002	1.68807	-2.42882	0.0151479	0.113516	protein_coding	intronic	0	0	0	1	0	0	0	0	0	0	0	0	0	0
wt_saf_neg_peak_5055	chr1	84081086	84081424	-	339	15	25	21	28	5	3	0	4	Yes	0.403775	0.740403	0.631051	0.380006	0.151774	0.0931411	0	0.264436	N/A	No	0.591743	0.122458	Yes	12.6159	-1.99818	0.815325	-2.45078	0.0142548	0.109169	protein_coding	intronic	0	1	0	0	0	0	0	0	0	0	0	0	0	0
wt_saf_neg_peak_5058	chr1	84087524	84087684	-	161	9	12	3	12	0	0	0	1	Yes	0.242265	0.355393	0.0901502	0.16286	0	0	0	0.0661091	N/A	No	0.22927	0	Yes	4.16865	-5.06459	1.8428	-2.74831	0.0059903	0.0607004	protein_coding	intronic	0	0	0	0	0	0	0	0	0	0	0	0	0	0
wt_saf_neg_peak_5059	chr1	84091025	84091196	-	172	7	16	4	1	0	0	0	0	Yes	0.188428	0.473858	0.1202	0.0135716	0	0	0	0	N/A	Yes	0.260829	0	Yes	4.7256	-5.24384	1.80994	-2.89724	0.0037646	0.043661	protein_coding	intronic	0	0	0	1	0	0	0	0	0	0	0	1	0	0
wt_saf_neg_peak_5062	chr1	84093715	84093862	-	148	7	15	10	11	0	1	0	2	Yes	0.188428	0.444242	0.300501	0.149288	0	0.031047	0	0.132218	N/A	Yes	0.311057	0.0155235	Yes	5.90581	-4.05713	1.70486	-2.37974	0.0173248	0.123942	protein_coding	intronic	1	0	0	1	0	0	0	0	0	0	0	0	0	0
wt_saf_neg_peak_5069	chr1	84120510	84121230	-	721	27	16	7	11	2	0	0	0	Yes	0.726795	0.473858	0.21035	0.149288	0.0607097	0	0	0	N/A	Yes	0.470334	0.0303549	Yes	9.05554	-3.68326	1.30313	-2.82646	0.0047065	0.0512138	protein_coding	intronic	0	0	0	0	0	0	0	0	0	0	0	1	0	0
wt_saf_neg_peak_5081	chr1	84157110	84157734	-	625	61	40	33	45	20	12	0	4	Yes	1.64202	1.18464	0.991652	0.610724	0.607097	0.372564	0	0.264436	N/A	No	1.27277	0.489831	Yes	30.5455	-1.11471	0.504362	-2.21015	0.0270951	0.166395	protein_coding	UTR3	0	0	1	0	0	0	0	0	0	0	1	1	0	0
wt_saf_neg_peak_5082	chr1	84159201	84159380	-	180	20	17	13	23	2	3	0	1	Yes	0.538367	0.503474	0.390651	0.312148	0.0607097	0.0931411	0	0.0661091	N/A	No	0.477497	0.0769254	Yes	9.88857	-2.36481	0.950091	-2.48903	0.0128092	0.101651	protein_coding	UTR5	0	0	0	0	0	0	0	0	0	0	0	0	0	0
wt_saf_neg_peak_5094	chr1	84188542	84188634	-	93	16	6	9	13	0	1	0	0	Yes	0.430693	0.177697	0.270451	0.176431	0	0.031047	0	0	N/A	No	0.292947	0.0155235	Yes	5.63586	-3.99048	1.71996	-2.3201	0.0203354	0.136985	protein_coding	intronic	0	0	0	0	0	0	0	0	0	0	0	0	0	0
wt_saf_neg_peak_5102	chr1	84203259	84203721	-	463	18	17	11	31	0	4	0	0	Yes	0.48453	0.503474	0.330551	0.420721	0	0.124188	0	0	N/A	No	0.439518	0.0620941	Yes	8.97656	-2.55055	1.06374	-2.39771	0.0164978	0.119983	protein_coding	intronic	0	0	2	0	0	0	0	0	0	0	0	1	0	0
wt_saf_neg_peak_5115	chr1	84226468	84226843	-	376	18	18	21	22	3	2	0	0	Yes	0.48453	0.53309	0.631051	0.298576	0.0910646	0.0620941	0	0	N/A	No	0.549557	0.0765793	Yes	11.2135	-2.57408	0.920961	-2.79499	0.00519013	0.0548692	protein_coding	intronic	0	0	0	1	0	0	0	0	0	0	0	0	0	0
wt_saf_neg_peak_5136	chr1	84270800	84270994	-	195	16	5	7	10	1	0	0	1	Yes	0.430693	0.148081	0.21035	0.135716	0.0303549	0	0	0.0661091	N/A	No	0.263041	0.0151774	Yes	5.07164	-3.84627	1.75718	-2.18889	0.0286052	0.172644	protein_coding	intronic	0	0	0	0	0	0	0	0	0	0	0	1	0	0
wt_saf_neg_peak_5138	chr1	84274961	84275251	-	291	36	39	31	12	10	10	0	0	Yes	0.96906	1.15503	0.931552	0.16286	0.303549	0.31047	0	0	N/A	Yes	1.01855	0.307009	Yes	23.174	-1.45843	0.564165	-2.58511	0.00973474	0.0848361	protein_coding	intronic	0	0	0	1	0	0	0	0	0	0	0	0	0	0
wt_saf_neg_peak_5229	chr1	84869443	84869555	-	113	2	6	6	5	0	0	0	0	Yes	0.0538367	0.177697	0.1803	0.0678582	0	0	0	0	N/A	Yes	0.137278	0	Yes	2.50986	-4.32547	2.04465	-2.11551	0.0343869	NA	other	intronic	0	0	0	0	0	0	0	0	0	0	0	0	0	0
wt_saf_neg_peak_5253	chr1	86284399	86284818	-	420	16	2	7	2	0	0	0	1	Yes	0.430693	0.0592322	0.21035	0.0271433	0	0	0	0.0661091	N/A	Yes	0.233425	0	Yes	4.32529	-5.11809	1.86714	-2.74114	0.00612255	0.061567	lncRNA	intronic	0	0	0	0	0	0	0	0	0	0	0	0	0	0
wt_saf_neg_peak_5254	chr1	86285606	86285899	-	294	4	8	8	0	0	0	0	1	Yes	0.107673	0.236929	0.240401	0	0	0	0	0.0661091	N/A	Yes	0.195001	0	Yes	3.5685	-4.83419	1.87862	-2.57326	0.0100746	0.086745	lncRNA	intronic	0	0	0	0	0	0	0	0	0	0	1	0	0	0
wt_saf_neg_peak_5261	chr1	86303049	86303251	-	203	11	8	3	0	0	0	0	0	Yes	0.296102	0.236929	0.0901502	0	0	0	0	0	N/A	Yes	0.207727	0	Yes	3.79877	-4.93186	1.86856	-2.63939	0.00830556	0.0761573	lncRNA	intronic	0	0	0	0	0	0	0	0	0	0	0	0	0	0
wt_saf_neg_peak_5262	chr1	86303682	86303928	-	247	8	2	8	0	0	0	0	2	Yes	0.215347	0.0592322	0.240401	0	0	0	0	0.132218	N/A	Yes	0.17166	0	Yes	3.18021	-4.67013	1.94962	-2.3954	0.0166021	0.120509	lncRNA	intronic	0	0	0	0	0	0	0	0	0	0	0	0	0	0
wt_saf_neg_peak_5275	chr1	86436032	86436403	-	372	6	11	4	0	0	0	0	0	Yes	0.16151	0.325777	0.1202	0	0	0	0	0	N/A	Yes	0.202496	0	Yes	3.68043	-4.88296	1.87301	-2.60701	0.00913363	0.0811913	other	intronic	0	0	0	0	0	0	0	0	0	0	0	3	0	0
wt_saf_neg_peak_5353	chr1	87652464	87652639	-	176	6	5	2	0	0	0	0	0	Yes	0.16151	0.148081	0.0601001	0	0	0	0	0	N/A	Yes	0.12323	0	Yes	2.25191	-4.17691	2.08823	-2.00022	0.0454764	NA	other	intronic	0	0	0	1	0	0	0	0	0	0	0	0	0	0
wt_saf_neg_peak_5368	chr1	87786647	87787074	-	428	5	12	4	0	0	0	0	0	Yes	0.134592	0.355393	0.1202	0	0	0	0	0	N/A	Yes	0.203395	0	Yes	3.68964	-4.88601	1.881	-2.59756	0.009389	0.082689	other	intronic	0	0	0	0	0	0	0	0	0	0	0	0	0	0
wt_saf_neg_peak_5488	chr1	91500814	91501412	-	599	163	306	191	168	63	96	0	3	Yes	4.38769	9.06253	5.73956	2.28003	1.91236	2.98052	0	0.198327	N/A	Yes	6.39659	2.44644	Yes	152.87	-1.10407	0.309436	-3.56803	0.00035968	0.00714677	other	intronic	0	0	0	0	0	0	0	0	0	0	2	0	0	0
wt_saf_neg_peak_5494	chr1	91920589	91920665	-	77	7	5	2	1	0	0	0	0	Yes	0.188428	0.148081	0.0601001	0.0135716	0	0	0	0	N/A	Yes	0.132203	0	Yes	2.41843	-4.28042	2.05664	-2.08127	0.0374089	NA	other	intronic	0	0	0	0	0	0	0	0	0	0	0	0	0	0
wt_saf_neg_peak_5495	chr1	91924358	91924577	-	220	19	13	10	6	0	0	0	0	Yes	0.511448	0.38501	0.300501	0.0814298	0	0	0	0	N/A	Yes	0.398986	0	Yes	7.31909	-5.87596	1.66878	-3.52111	0.00042975	0.00824069	other	intronic	0	1	0	1	0	0	0	0	0	0	0	0	0	0
wt_saf_neg_peak_5496	chr1	91927226	91927494	-	269	25	15	16	8	2	2	0	0	Yes	0.672958	0.444242	0.480801	0.108573	0.0607097	0.0620941	0	0	N/A	Yes	0.532667	0.0614019	Yes	10.6974	-2.85286	0.990266	-2.8809	0.00396543	0.0453266	other	intronic	0	0	0	0	0	0	0	0	0	0	0	0	0	0
wt_saf_neg_peak_5625	chr1	92347655	92347729	-	75	3	6	6	0	0	0	0	1	Yes	0.080755	0.177697	0.1803	0	0	0	0	0.0661091	N/A	Yes	0.146251	0	Yes	2.67638	-4.41912	1.99771	-2.21209	0.0269606	NA	other	intronic	1	0	0	0	0	0	0	0	0	0	0	0	0	0
wt_saf_neg_peak_5630	chr1	92438324	92438399	-	76	11	18	10	8	1	2	0	0	Yes	0.296102	0.53309	0.300501	0.108573	0.0303549	0.0620941	0	0	N/A	Yes	0.376564	0.0462245	Yes	7.55174	-2.74878	1.16036	-2.3689	0.0178411	0.126104	other	intronic	0	0	0	0	0	0	0	0	0	0	0	0	0	0
wt_saf_neg_peak_5668	chr1	93032715	93032789	-	75	3	7	5	1	0	0	0	0	Yes	0.080755	0.207313	0.15025	0.0135716	0	0	0	0	N/A	Yes	0.146106	0	Yes	2.66503	-4.41403	2.00111	-2.20579	0.0273989	NA	protein_coding	intronic	0	0	1	0	0	0	0	0	0	0	0	0	0	0
wt_saf_neg_peak_5677	chr1	93046732	93047946	-	1215	86	54	44	48	24	25	0	1	Yes	2.31498	1.59927	1.3222	0.651438	0.728517	0.776176	0	0.0661091	N/A	Yes	1.74548	0.752346	Yes	43.1387	-0.948398	0.429948	-2.20584	0.027395	0.167686	protein_coding	intronic	0	0	0	0	0	0	0	0	0	0	0	0	0	0
wt_saf_neg_peak_5695	chr1	93071044	93072381	-	1338	86	75	88	84	27	29	0	2	Yes	2.31498	2.22121	2.64441	1.14002	0.819581	0.900364	0	0.132218	N/A	Yes	2.39353	0.859973	Yes	56.6517	-1.2082	0.368054	-3.28267	0.00102829	0.0163835	protein_coding	intronic	0	0	0	2	0	0	0	0	0	0	0	0	0	0
wt_saf_neg_peak_5701	chr1	93078180	93078842	-	663	25	22	21	53	3	9	0	2	Yes	0.672958	0.651555	0.631051	0.719297	0.0910646	0.279423	0	0.132218	N/A	No	0.651855	0.185244	Yes	14.7166	-1.54223	0.729423	-2.11432	0.0344883	0.195425	protein_coding	intronic	0	0	0	0	0	0	0	0	0	0	0	0	0	0
wt_saf_neg_peak_5764	chr1	93455413	93455487	-	75	12	6	3	9	0	0	0	0	Yes	0.32302	0.177697	0.0901502	0.122145	0	0	0	0	N/A	No	0.196956	0	Yes	3.61383	-4.86054	1.89141	-2.5698	0.0101758	0.0873826	protein_coding	intronic	0	0	0	0	0	0	0	0	0	0	0	1	0	0
wt_saf_neg_peak_5832	chr1	94212673	94212802	-	130	6	2	6	0	0	0	0	0	Yes	0.16151	0.0592322	0.1803	0	0	0	0	0	N/A	Yes	0.133681	0	Yes	2.47302	-4.3073	2.04837	-2.1028	0.0354833	NA	other	intronic	0	0	0	0	0	0	0	0	0	0	0	0	0	0
wt_saf_neg_peak_5833	chr1	94214272	94214579	-	308	11	5	3	0	0	0	0	0	Yes	0.296102	0.148081	0.0901502	0	0	0	0	0	N/A	Yes	0.178111	0	Yes	3.27159	-4.7169	1.92719	-2.44755	0.014383	0.109822	other	intronic	0	1	0	0	0	0	0	0	0	0	0	0	0	0
wt_saf_neg_peak_5849	chr1	96836372	96836612	-	241	7	1	5	5	0	0	0	0	Yes	0.188428	0.0296161	0.15025	0.0678582	0	0	0	0	N/A	Yes	0.122765	0	Yes	2.27674	-4.18988	2.12368	-1.97294	0.0485028	NA	protein_coding	intronic	0	0	0	0	0	0	0	0	0	0	0	0	0	0
wt_saf_neg_peak_5866	chr1	97422649	97422840	-	192	22	13	26	8	4	3	0	2	Yes	0.592203	0.38501	0.781302	0.108573	0.121419	0.0931411	0	0.132218	N/A	Yes	0.586172	0.10728	Yes	12.389	-2.18755	0.847972	-2.57974	0.00988751	0.0857203	other	intronic	0	1	0	0	0	0	0	0	0	0	0	0	0	0
wt_saf_neg_peak_5943	chr1	98022517	98023048	-	532	24	7	11	0	0	0	0	4	Yes	0.64604	0.207313	0.330551	0	0	0	0	0.264436	N/A	Yes	0.394635	0	Yes	7.28439	-5.86981	1.69415	-3.46475	0.00053073	0.00976183	protein_coding	intronic	0	1	0	0	0	0	0	0	0	0	0	0	0	0
wt_saf_neg_peak_5966	chr1	98066661	98066763	-	103	7	2	11	1	0	0	0	0	Yes	0.188428	0.0592322	0.330551	0.0135716	0	0	0	0	N/A	Yes	0.192737	0	Yes	3.57491	-4.83648	1.91734	-2.5225	0.0116525	0.0956562	protein_coding	intronic	0	0	0	0	0	0	0	0	0	0	0	0	0	0
wt_saf_neg_peak_5967	chr1	98069375	98069501	-	127	8	4	7	4	0	0	0	0	Yes	0.215347	0.118464	0.21035	0.0542865	0	0	0	0	N/A	Yes	0.181387	0	Yes	3.34459	-4.7437	1.89815	-2.49912	0.0124502	0.0997604	protein_coding	intronic	0	0	0	0	0	0	0	0	0	0	0	0	0	0
wt_saf_neg_peak_6014	chr1	105482144	105482980	-	837	6	16	19	7	0	2	0	4	Yes	0.16151	0.473858	0.570951	0.0950014	0	0.0620941	0	0.264436	N/A	Yes	0.402106	0.031047	Yes	7.83219	-3.42278	1.3333	-2.56715	0.0102539	0.0877601	lncRNA	intronic	0	0	0	1	0	0	0	0	0	0	0	0	0	0
wt_saf_neg_peak_6094	chr1	105971984	105972543	-	560	16	15	12	0	0	4	0	4	Yes	0.430693	0.444242	0.360601	0	0	0.124188	0	0.264436	N/A	Yes	0.411845	0.0620941	Yes	8.47914	-2.45715	1.0753	-2.28508	0.0223084	0.145734	other	intronic	0	1	0	0	0	0	0	0	0	0	0	0	0	0
wt_saf_neg_peak_6106	chr1	106542554	106542936	-	383	8	3	8	2	0	0	0	0	Yes	0.215347	0.0888483	0.240401	0.0271433	0	0	0	0	N/A	Yes	0.181532	0	Yes	3.35594	-4.74778	1.9101	-2.48563	0.0129324	0.102318	protein_coding	UTR3	0	0	0	0	0	0	0	0	0	0	0	0	0	0
wt_saf_neg_peak_6117	chr1	106662802	106662896	-	95	5	9	3	0	0	0	0	0	Yes	0.134592	0.266545	0.0901502	0	0	0	0	0	N/A	Yes	0.163762	0	Yes	2.97538	-4.57648	1.95903	-2.33609	0.0194865	0.133251	protein_coding	intronic	0	0	0	0	0	0	0	0	0	0	0	0	0	0
wt_saf_neg_peak_6128	chr1	106697831	106698030	-	200	5	6	2	0	0	0	0	0	Yes	0.134592	0.177697	0.0601001	0	0	0	0	0	N/A	Yes	0.124129	0	Yes	2.26112	-4.18188	2.08705	-2.00373	0.0450988	NA	protein_coding	intronic	0	0	0	0	0	0	0	0	0	0	0	0	0	0
wt_saf_neg_peak_6190	chr1	111793469	111793868	-	400	5	20	4	5	0	0	0	0	Yes	0.134592	0.592322	0.1202	0.0678582	0	0	0	0	N/A	No	0.282371	0	Yes	5.09548	-5.35173	1.81634	-2.94644	0.00321454	0.0389443	other	intronic	0	0	0	1	0	0	0	0	0	0	0	0	0	0
wt_saf_neg_peak_6193	chr1	111806818	111807112	-	295	10	14	1	4	0	1	0	0	Yes	0.269183	0.414626	0.0300501	0.0542865	0	0.031047	0	0	N/A	Yes	0.237953	0.0155235	Yes	4.54598	-3.66521	1.8456	-1.98591	0.0470432	0.23832	other	exonic	0	0	0	0	0	0	0	0	0	0	0	0	0	0
wt_saf_neg_peak_6194	chr1	111827905	111828398	-	494	20	22	9	0	0	0	0	4	Yes	0.538367	0.651555	0.270451	0	0	0	0	0.264436	N/A	Yes	0.486791	0	Yes	8.8801	-6.15501	1.64205	-3.74837	0.00017799	0.00400424	other	intronic	0	1	0	2	0	0	0	0	0	0	0	0	0	0
wt_saf_neg_peak_6216	chr1	113899767	113900080	-	314	14	7	5	6	0	0	0	0	Yes	0.376857	0.207313	0.15025	0.0814298	0	0	0	0	N/A	Yes	0.244807	0	Yes	4.49675	-5.17483	1.80511	-2.86677	0.00414689	0.0467349	lncRNA	intronic	0	1	0	0	0	0	0	0	0	0	0	0	0	0
wt_saf_neg_peak_6223	chr1	113908946	113909624	-	679	11	11	4	0	1	0	0	0	Yes	0.296102	0.325777	0.1202	0	0.0303549	0	0	0	N/A	Yes	0.24736	0.0151774	Yes	4.73219	-3.74165	1.76854	-2.11567	0.0343728	0.194993	lncRNA	intronic	0	3	0	0	0	0	0	0	0	0	1	0	0	0
wt_saf_neg_peak_6226	chr1	113914711	113915217	-	507	18	9	10	6	1	1	0	1	Yes	0.48453	0.266545	0.300501	0.0814298	0.0303549	0.031047	0	0.0661091	N/A	Yes	0.350525	0.0307009	Yes	6.90232	-3.2513	1.32357	-2.45646	0.0140312	0.10802	lncRNA	intronic	0	1	0	0	0	0	0	0	0	0	1	0	0	0
wt_saf_neg_peak_6228	chr1	113917130	113917813	-	684	16	23	12	3	5	0	0	3	Yes	0.430693	0.681171	0.360601	0.0407149	0.151774	0	0	0.198327	N/A	Yes	0.490822	0.0758871	Yes	10.0468	-2.42025	1.00186	-2.41575	0.0157028	0.116105	lncRNA	intronic	0	0	1	0	0	0	0	0	0	0	0	1	0	0
wt_saf_neg_peak_6230	chr1	113919296	113919733	-	438	21	21	6	14	0	5	0	4	Yes	0.565285	0.621938	0.1803	0.190003	0	0.155235	0	0.264436	N/A	Yes	0.455841	0.0776176	Yes	9.47716	-2.27339	1.05562	-2.15361	0.0312704	0.183087	lncRNA	intronic	0	0	0	1	0	0	0	0	0	0	0	0	0	0
wt_saf_neg_peak_6233	chr1	113923598	113924655	-	1058	53	32	44	38	14	5	0	2	Yes	1.42667	0.947716	1.3222	0.515722	0.424968	0.155235	0	0.132218	N/A	Yes	1.2322	0.290102	Yes	26.9159	-1.82635	0.575512	-3.17343	0.00150647	0.0219812	lncRNA	intronic	0	0	0	1	0	0	0	0	0	0	0	1	0	0
wt_saf_neg_peak_6287	chr1	118382606	118382770	-	165	6	7	3	4	0	0	0	0	Yes	0.16151	0.207313	0.0901502	0.0542865	0	0	0	0	N/A	Yes	0.152991	0	Yes	2.79044	-4.48471	1.97648	-2.26904	0.0232661	NA	other	intronic	0	0	0	1	0	0	0	0	0	0	0	0	0	0
wt_saf_neg_peak_6301	chr1	118665316	118665646	-	331	65	73	35	7	3	4	0	1	Yes	1.74969	2.16198	1.05175	0.0950014	0.0910646	0.124188	0	0.0661091	N/A	Yes	1.65447	0.107626	Yes	31.7911	-3.66879	0.699227	-5.24691	1.54669e-07	8.65009e-06	other	intronic	0	0	0	2	0	0	0	0	0	0	1	1	0	0
wt_saf_neg_peak_6436	chr1	119070932	119071324	-	393	6	4	10	0	0	0	0	0	Yes	0.16151	0.118464	0.300501	0	0	0	0	0	N/A	Yes	0.193492	0	Yes	3.57278	-4.83556	1.88413	-2.56646	0.0102743	0.0878667	other	intronic	0	0	0	0	0	0	0	0	0	0	0	0	0	0
wt_saf_neg_peak_6503	chr1	119604458	119604675	-	218	19	9	5	0	0	2	0	1	Yes	0.511448	0.266545	0.15025	0	0	0.0620941	0	0.0661091	N/A	Yes	0.309415	0.031047	Yes	6.14781	-3.05566	1.39524	-2.19007	0.0285193	0.17229	protein_coding	intronic	0	0	0	0	0	0	0	0	0	0	0	1	0	0
wt_saf_neg_peak_6524	chr1	119640697	119641096	-	400	25	36	18	15	12	3	0	4	Yes	0.672958	1.06618	0.540901	0.203575	0.364258	0.0931411	0	0.264436	N/A	Yes	0.760013	0.2287	Yes	17.187	-1.4618	0.702526	-2.08078	0.0374542	0.206123	protein_coding	intronic	0	2	0	0	0	0	0	0	0	0	0	1	0	0
wt_saf_neg_peak_6655	chr1	121326704	121327563	-	860	35	45	19	14	9	10	0	1	Yes	0.942142	1.33273	0.570951	0.190003	0.273194	0.31047	0	0.0661091	N/A	Yes	0.948606	0.291832	Yes	21.5978	-1.42389	0.612401	-2.3251	0.0200668	0.135722	protein_coding	UTR5	0	0	0	0	0	0	0	0	0	0	1	0	0	0
wt_saf_neg_peak_6659	chr1	121546818	121547106	-	289	14	11	7	0	0	0	0	3	Yes	0.376857	0.325777	0.21035	0	0	0	0	0.198327	N/A	Yes	0.304328	0	Yes	5.57382	-5.48311	1.7319	-3.16594	0.00154581	0.0224137	other	intronic	0	0	0	0	0	0	0	0	0	0	0	1	0	0
wt_saf_neg_peak_6676	chr1	123679028	123679104	-	77	8	5	4	0	0	0	0	2	Yes	0.215347	0.148081	0.1202	0	0	0	0	0.132218	N/A	Yes	0.161209	0	Yes	2.9591	-4.56976	1.94587	-2.34845	0.0188519	0.130489	protein_coding	intronic	0	1	0	0	0	0	0	0	0	0	0	0	0	0
wt_saf_neg_peak_6717	chr1	125498423	125498601	-	179	8	4	8	0	0	0	0	0	Yes	0.215347	0.118464	0.240401	0	0	0	0	0	N/A	Yes	0.191404	0	Yes	3.53167	-4.82148	1.87986	-2.56481	0.0103231	0.0881526	other	intronic	0	0	0	1	0	0	0	0	0	0	0	0	0	0
wt_saf_neg_peak_6735	chr1	125543738	125544076	-	339	32	8	11	12	2	3	0	1	Yes	0.861387	0.236929	0.330551	0.16286	0.0607097	0.0931411	0	0.0661091	N/A	Yes	0.476289	0.0769254	Yes	9.9311	-2.37417	1.01088	-2.34862	0.018843	0.130479	other	intronic	0	0	0	0	0	0	0	0	0	0	1	2	0	0
wt_saf_neg_peak_6891	chr1	128363263	128363399	-	137	14	19	14	3	4	2	0	3	Yes	0.376857	0.562706	0.420701	0.0407149	0.121419	0.0620941	0	0.198327	N/A	Yes	0.453421	0.0917567	Yes	9.63281	-2.03191	0.924224	-2.1985	0.0279134	0.169864	other	intronic	0	0	0	1	0	0	0	0	0	0	0	0	0	0
wt_saf_neg_peak_6970	chr1	131072159	131072233	-	75	7	11	14	6	0	1	0	3	Yes	0.188428	0.325777	0.420701	0.0814298	0	0.031047	0	0.198327	N/A	Yes	0.311636	0.0155235	Yes	5.95119	-4.06664	1.70275	-2.38828	0.0169276	0.122055	protein_coding	intronic	0	0	0	1	0	0	0	0	0	0	0	0	0	0
wt_saf_neg_peak_6998	chr1	131267461	131267667	-	207	1	10	5	0	0	0	0	0	Yes	0.0269183	0.296161	0.15025	0	0	0	0	0	N/A	Yes	0.157777	0	Yes	2.85918	-4.51465	2.03801	-2.21522	0.0267446	NA	protein_coding	intronic	0	1	0	0	0	0	0	0	0	0	1	1	0	0
wt_saf_neg_peak_7059	chr1	131426835	131427021	-	187	11	30	7	28	3	2	0	3	Yes	0.296102	0.888483	0.21035	0.380006	0.0910646	0.0620941	0	0.198327	N/A	No	0.464979	0.0765793	Yes	9.53759	-2.31541	1.02703	-2.25447	0.0241667	0.153997	protein_coding	intronic	0	0	0	0	0	0	0	0	0	0	0	0	0	0
wt_saf_neg_peak_7132	chr1	132120704	132120778	-	75	1	12	5	0	0	0	0	2	Yes	0.0269183	0.355393	0.15025	0	0	0	0	0.132218	N/A	Yes	0.177521	0	Yes	3.21064	-4.6824	2.00065	-2.34044	0.0192609	0.132312	protein_coding	intronic	0	0	0	0	0	0	0	0	0	0	0	0	0	0
wt_saf_neg_peak_7144	chr1	132189841	132190154	-	314	10	10	11	0	0	0	0	1	Yes	0.269183	0.296161	0.330551	0	0	0	0	0.0661091	N/A	Yes	0.298632	0	Yes	5.4803	-5.45518	1.7298	-3.15365	0.00161244	0.0231582	other	intronic	0	0	0	0	0	0	0	0	0	0	0	0	0	0
wt_saf_neg_peak_7158	chr1	132324865	132325171	-	307	5	3	8	0	0	0	0	0	Yes	0.134592	0.0888483	0.240401	0	0	0	0	0	N/A	Yes	0.154614	0	Yes	2.85638	-4.51281	1.97602	-2.28379	0.0223841	NA	other	intronic	0	0	0	0	0	0	0	0	0	0	0	0	0	0
wt_saf_neg_peak_7204	chr1	132576242	132576711	-	470	22	23	19	33	2	5	0	3	Yes	0.592203	0.681171	0.570951	0.447864	0.0607097	0.155235	0	0.198327	N/A	No	0.614775	0.107972	Yes	12.8654	-2.23711	0.827041	-2.70495	0.00683141	0.0665033	protein_coding	intronic	0	0	0	0	0	0	0	0	0	0	1	0	0	0
wt_saf_neg_peak_7207	chr1	132584090	132584555	-	466	13	13	21	10	1	4	0	1	Yes	0.349938	0.38501	0.631051	0.135716	0.0303549	0.124188	0	0.0661091	N/A	Yes	0.455333	0.0772715	Yes	9.53095	-2.28913	0.984959	-2.32409	0.0201208	0.135983	protein_coding	intronic	0	0	0	0	0	0	0	0	0	0	0	0	0	0
wt_saf_neg_peak_7210	chr1	132590636	132590903	-	268	22	30	15	40	4	0	0	0	Yes	0.592203	0.888483	0.450751	0.542865	0.121419	0	0	0	N/A	No	0.643813	0.0607097	Yes	12.6181	-3.12909	0.989699	-3.16166	0.00156872	0.0226748	protein_coding	intronic	0	0	0	0	0	0	0	0	0	0	0	0	0	0
wt_saf_neg_peak_7256	chr1	132696578	132696809	-	232	12	14	7	3	0	0	0	3	Yes	0.32302	0.414626	0.21035	0.0407149	0	0	0	0.198327	N/A	Yes	0.315999	0	Yes	5.76796	-5.53173	1.72458	-3.20757	0.0013386	0.020091	protein_coding	intronic	0	0	0	0	0	0	0	0	0	0	0	0	0	0
wt_saf_neg_peak_7325	chr1	133315544	133315665	-	122	9	6	4	17	0	0	0	3	Yes	0.242265	0.177697	0.1202	0.230718	0	0	0	0.198327	N/A	No	0.180054	0	Yes	3.30135	-4.72807	1.90327	-2.48418	0.012985	0.102552	other	intronic	0	0	0	0	0	0	0	0	0	0	0	1	0	0
wt_saf_neg_peak_7328	chr1	133323708	133323847	-	140	6	6	1	5	0	0	0	0	Yes	0.16151	0.177697	0.0300501	0.0678582	0	0	0	0	N/A	Yes	0.123086	0	Yes	2.24057	-4.17059	2.12625	-1.96148	0.0498234	NA	other	intronic	0	0	0	0	0	0	0	0	0	0	0	0	0	0
wt_saf_neg_peak_7370	chr1	133615173	133615416	-	244	43	27	25	16	12	9	0	4	Yes	1.15749	0.799635	0.751252	0.217146	0.364258	0.279423	0	0.264436	N/A	Yes	0.902792	0.321841	Yes	21.3133	-1.22454	0.588596	-2.08045	0.0374846	0.20622	other	intronic	0	0	0	0	0	0	0	0	0	0	0	2	0	0
wt_saf_neg_peak_7397	chr1	133702184	133702410	-	227	9	5	15	0	0	2	0	0	Yes	0.242265	0.148081	0.450751	0	0	0.0620941	0	0	N/A	Yes	0.280366	0.031047	Yes	5.65043	-2.914	1.41594	-2.058	0.0395901	0.213739	protein_coding	UTR3	0	0	0	0	0	0	0	0	0	0	0	0	0	0
wt_saf_neg_peak_7465	chr1	134454951	134455280	-	330	11	7	4	0	0	0	0	3	Yes	0.296102	0.207313	0.1202	0	0	0	0	0.198327	N/A	Yes	0.207872	0	Yes	3.81012	-4.93556	1.85632	-2.65878	0.00784231	0.0731712	other	exonic	0	0	0	0	0	0	0	0	0	0	0	0	0	0
wt_saf_neg_peak_7527	chr1	134840900	134841602	-	703	24	22	9	16	4	4	0	4	Yes	0.64604	0.651555	0.270451	0.217146	0.121419	0.124188	0	0.264436	N/A	Yes	0.522682	0.122804	Yes	11.3568	-1.81799	0.853789	-2.12932	0.0332278	0.190558	protein_coding	intronic	0	1	0	0	0	0	0	0	0	0	0	0	0	0
wt_saf_neg_peak_7545	chr1	134872804	134872940	-	137	16	21	11	28	4	3	0	1	Yes	0.430693	0.621938	0.330551	0.380006	0.121419	0.0931411	0	0.0661091	N/A	No	0.461061	0.10728	Yes	9.98958	-1.82891	0.89039	-2.05406	0.03997	0.215024	protein_coding	exonic	0	0	0	0	0	0	0	0	0	0	0	0	0	0
wt_saf_neg_peak_7668	chr1	135423474	135423583	-	110	16	9	17	25	0	4	0	0	Yes	0.430693	0.266545	0.510851	0.339291	0	0.124188	0	0	N/A	No	0.402696	0.0620941	Yes	8.36013	-2.43151	1.09507	-2.22041	0.0263911	0.163396	protein_coding	intronic	0	0	0	0	0	0	0	0	0	0	0	1	0	0
wt_saf_neg_peak_7769	chr1	135641378	135641618	-	241	9	6	14	4	2	0	0	1	Yes	0.242265	0.177697	0.420701	0.0542865	0.0607097	0	0	0.0661091	N/A	Yes	0.280221	0.0303549	Yes	5.61041	-2.94222	1.41157	-2.08436	0.0371278	0.205003	protein_coding	intronic	0	1	0	0	0	0	0	0	0	0	0	1	0	0
wt_saf_neg_peak_7802	chr1	136191878	136192448	-	571	15	9	13	0	0	2	0	1	Yes	0.403775	0.266545	0.390651	0	0	0.0620941	0	0.0661091	N/A	Yes	0.353657	0.031047	Yes	6.97832	-3.24969	1.32833	-2.44646	0.0144267	0.110022	protein_coding	intronic	0	0	0	0	0	0	0	0	0	0	0	0	0	0
wt_saf_neg_peak_7837	chr1	136328003	136328672	-	670	24	28	22	8	5	4	0	4	Yes	0.64604	0.829251	0.661101	0.108573	0.151774	0.124188	0	0.264436	N/A	Yes	0.712131	0.137981	Yes	15.0623	-2.09559	0.744515	-2.81471	0.00488211	0.0525531	protein_coding	intronic	1	2	0	0	0	0	0	0	0	0	0	1	0	0
wt_saf_neg_peak_7891	chr1	136838675	136838787	-	113	11	5	7	0	0	1	0	0	Yes	0.296102	0.148081	0.21035	0	0	0.031047	0	0	N/A	Yes	0.218178	0.0155235	Yes	4.25338	-3.56229	1.78925	-1.99094	0.0464871	0.236513	other	intronic	0	0	0	0	0	0	0	0	0	0	0	0	0	0
wt_saf_neg_peak_8041	chr1	140432562	140432731	-	170	10	8	2	5	0	0	0	2	Yes	0.269183	0.236929	0.0601001	0.0678582	0	0	0	0.132218	N/A	Yes	0.188737	0	Yes	3.44518	-4.79134	1.91933	-2.49636	0.0125474	0.100344	other	intronic	0	1	0	0	0	0	0	0	0	0	0	0	0	0
wt_saf_neg_peak_8109	chr1	143762242	143762453	-	212	12	15	17	8	0	4	0	1	Yes	0.32302	0.444242	0.510851	0.108573	0	0.124188	0	0.0661091	N/A	Yes	0.426038	0.0620941	Yes	8.74843	-2.50491	1.07241	-2.33578	0.0195028	0.133343	protein_coding	intronic	0	0	0	0	0	0	0	0	0	0	0	2	0	0
wt_saf_neg_peak_8190	chr1	150583700	150584106	-	407	5	9	4	0	0	0	0	0	Yes	0.134592	0.266545	0.1202	0	0	0	0	0	N/A	Yes	0.173779	0	Yes	3.16246	-4.66356	1.9251	-2.4225	0.015414	0.114712	protein_coding	intronic	0	0	0	0	0	0	0	0	0	0	0	0	0	0
wt_saf_neg_peak_8191	chr1	150613214	150613793	-	580	26	14	8	0	2	1	0	2	Yes	0.699877	0.414626	0.240401	0	0.0607097	0.031047	0	0.132218	N/A	Yes	0.451634	0.0458784	Yes	8.95814	-3.03492	1.14118	-2.65946	0.00782664	0.0730765	protein_coding	intronic	0	1	0	0	0	0	0	0	0	0	0	0	0	0
wt_saf_neg_peak_8195	chr1	150681750	150682020	-	271	6	8	1	0	0	0	0	0	Yes	0.16151	0.236929	0.0300501	0	0	0	0	0	N/A	Yes	0.14283	0	Yes	2.59203	-4.38015	2.06376	-2.12241	0.0338035	NA	protein_coding	intronic	0	0	0	0	0	0	0	0	0	0	0	0	0	0
wt_saf_neg_peak_8209	chr1	150933076	150933680	-	605	17	9	15	5	2	2	0	0	Yes	0.457612	0.266545	0.450751	0.0678582	0.0607097	0.0620941	0	0	N/A	Yes	0.391636	0.0614019	Yes	8.12383	-2.41101	1.06004	-2.27444	0.0229393	0.148575	protein_coding	intronic	0	1	0	0	0	0	0	0	0	0	0	0	0	0
wt_saf_neg_peak_8266	chr1	151447646	151447870	-	225	48	50	19	7	12	14	0	0	Yes	1.29208	1.48081	0.570951	0.0950014	0.364258	0.434659	0	0	N/A	Yes	1.11461	0.399458	Yes	26.2327	-1.20543	0.567692	-2.1234	0.0337206	0.192547	other	intronic	0	0	0	0	0	0	0	0	0	0	1	2	0	0
wt_saf_neg_peak_8301	chr1	151882687	151882790	-	104	8	4	7	0	0	0	0	3	Yes	0.215347	0.118464	0.21035	0	0	0	0	0.198327	N/A	Yes	0.181387	0	Yes	3.34459	-4.7437	1.89815	-2.49912	0.0124502	0.0997604	other	intronic	0	0	0	0	0	0	0	0	0	0	0	0	0	0
wt_saf_neg_peak_8342	chr1	151983973	151984228	-	256	7	12	6	0	0	1	0	4	Yes	0.188428	0.355393	0.1803	0	0	0.031047	0	0.264436	N/A	Yes	0.241374	0.0155235	Yes	4.63033	-3.69059	1.76461	-2.09145	0.0364878	0.20271	protein_coding	intronic	0	0	0	0	0	0	0	0	0	0	0	0	0	0
wt_saf_neg_peak_8492	chr1	153140928	153141116	-	189	14	9	7	23	0	0	0	3	Yes	0.376857	0.266545	0.21035	0.312148	0	0	0	0.198327	N/A	No	0.284584	0	Yes	5.22236	-5.38926	1.74972	-3.08007	0.00206955	0.0279883	protein_coding	intronic	0	0	0	0	0	0	0	0	0	0	0	0	0	0
wt_saf_neg_peak_8494	chr1	153144208	153144463	-	256	16	22	8	14	3	1	0	2	Yes	0.430693	0.651555	0.240401	0.190003	0.0910646	0.031047	0	0.132218	N/A	Yes	0.440883	0.0610558	Yes	8.91793	-2.57546	1.05943	-2.43098	0.0150578	0.113068	protein_coding	intronic	0	0	0	0	0	0	0	0	0	0	0	0	0	0
wt_saf_neg_peak_8502	chr1	153164600	153164688	-	89	6	6	3	3	0	0	0	0	Yes	0.16151	0.177697	0.0901502	0.0407149	0	0	0	0	N/A	Yes	0.143119	0	Yes	2.61472	-4.39098	2.00292	-2.19229	0.0283588	NA	protein_coding	intronic	0	0	0	0	0	0	0	0	0	0	0	0	0	0
wt_saf_neg_peak_8649	chr1	155180137	155180291	-	155	8	1	6	1	0	0	0	0	Yes	0.215347	0.0296161	0.1803	0.0135716	0	0	0	0	N/A	Yes	0.141754	0	Yes	2.63033	-4.39785	2.05998	-2.1349	0.0327693	NA	other	intronic	0	0	0	0	0	0	0	0	0	0	0	0	0	0
wt_saf_neg_peak_8652	chr1	155211773	155212182	-	410	10	9	8	1	0	1	0	0	Yes	0.269183	0.266545	0.240401	0.0135716	0	0.031047	0	0	N/A	Yes	0.25871	0.0155235	Yes	4.97685	-3.80076	1.73389	-2.19205	0.0283761	0.171699	other	intronic	0	0	0	0	0	0	0	0	0	0	0	0	0	0
wt_saf_neg_peak_8724	chr1	155635365	155635445	-	81	8	6	10	0	0	0	0	1	Yes	0.215347	0.177697	0.300501	0	0	0	0	0.0661091	N/A	Yes	0.231181	0	Yes	4.25727	-5.09002	1.80946	-2.81301	0.00490797	0.052749	other	intronic	0	0	0	0	0	0	0	0	0	0	1	1	0	0
wt_saf_neg_peak_8825	chr1	156195078	156195168	-	91	10	12	17	4	2	2	0	2	Yes	0.269183	0.355393	0.510851	0.0542865	0.0607097	0.0620941	0	0.132218	N/A	Yes	0.378476	0.0614019	Yes	7.85953	-2.3538	1.06971	-2.20042	0.0277769	0.169279	protein_coding	intronic	0	0	0	0	0	0	0	0	0	0	1	0	0	0
wt_saf_neg_peak_8889	chr1	156560222	156560715	-	494	40	50	24	10	10	7	0	3	Yes	1.07673	1.48081	0.721202	0.135716	0.303549	0.217329	0	0.198327	N/A	Yes	1.09291	0.260439	Yes	23.7631	-1.79506	0.60016	-2.99097	0.00278091	0.0349105	other	intronic	0	0	0	0	0	0	0	0	0	0	1	0	0	0
wt_saf_neg_peak_8998	chr1	157099934	157100136	-	203	6	2	6	0	0	0	0	0	Yes	0.16151	0.0592322	0.1803	0	0	0	0	0	N/A	Yes	0.133681	0	Yes	2.47302	-4.3073	2.04837	-2.1028	0.0354833	NA	protein_coding	intronic	0	0	0	0	0	0	0	0	0	0	0	0	0	0
wt_saf_neg_peak_9019	chr1	157146169	157146261	-	93	5	7	4	0	0	0	0	4	Yes	0.134592	0.207313	0.1202	0	0	0	0	0.264436	N/A	Yes	0.154035	0	Yes	2.811	-4.49357	1.9664	-2.28517	0.0223027	NA	protein_coding	exonic	0	0	0	0	0	0	0	0	0	0	0	0	0	0
wt_saf_neg_peak_9052	chr1	157218150	157218252	-	103	11	15	8	11	0	3	0	0	Yes	0.296102	0.444242	0.240401	0.149288	0	0.0931411	0	0	N/A	No	0.326915	0.0465706	Yes	6.66474	-2.53384	1.22056	-2.07597	0.0378965	0.2077	protein_coding	intronic	0	0	0	0	0	0	0	0	0	0	0	0	0	0
wt_saf_neg_peak_9159	chr1	160226463	160226714	-	252	11	27	16	20	3	4	0	1	Yes	0.296102	0.799635	0.480801	0.271433	0.0910646	0.124188	0	0.0661091	N/A	No	0.525513	0.107626	Yes	11.1611	-2.00573	0.883711	-2.26966	0.0232281	0.149886	protein_coding	exonic	0	0	0	0	0	0	0	0	0	0	0	0	0	0
wt_saf_neg_peak_9180	chr1	160274267	160275460	-	1194	20	19	7	11	4	2	0	0	Yes	0.538367	0.562706	0.21035	0.149288	0.121419	0.0620941	0	0	N/A	Yes	0.437141	0.0917567	Yes	9.32241	-1.98168	0.961064	-2.06197	0.039211	0.212365	protein_coding	intronic	0	0	0	2	0	0	0	0	0	0	0	3	0	0
wt_saf_neg_peak_9205	chr1	160326194	160326323	-	130	3	9	6	8	0	0	0	0	Yes	0.080755	0.266545	0.1803	0.108573	0	0	0	0	N/A	No	0.175867	0	Yes	3.20357	-4.67924	1.93131	-2.42284	0.0153999	0.114672	protein_coding	intronic	0	0	0	0	0	0	0	0	0	0	0	0	0	0
wt_saf_neg_peak_9356	chr1	160931160	160931753	-	594	47	56	39	6	8	9	0	3	Yes	1.26516	1.6585	1.17195	0.0814298	0.242839	0.279423	0	0.198327	N/A	Yes	1.36521	0.261131	Yes	28.8179	-2.1128	0.550535	-3.83773	0.000124179	0.00297469	other	intronic	0	0	1	0	0	0	0	0	0	0	0	2	0	0
wt_saf_neg_peak_9391	chr1	161096154	161096638	-	485	35	27	36	17	11	11	0	3	Yes	0.942142	0.799635	1.0818	0.230718	0.333903	0.341517	0	0.198327	N/A	Yes	0.941193	0.33771	Yes	22.2868	-1.21207	0.567992	-2.13396	0.0328463	0.189039	protein_coding	intronic	0	1	0	0	0	0	0	0	0	0	0	2	0	0
wt_saf_neg_peak_9467	chr1	162556639	162556877	-	239	6	4	5	2	0	0	0	1	Yes	0.16151	0.118464	0.15025	0.0271433	0	0	0	0.0661091	N/A	Yes	0.143408	0	Yes	2.63741	-4.40131	1.99225	-2.20921	0.02716	NA	other	intronic	0	0	0	0	0	0	0	0	0	0	0	0	0	0
wt_saf_neg_peak_9604	chr1	165169448	165169541	-	94	5	10	5	9	0	0	0	3	Yes	0.134592	0.296161	0.15025	0.122145	0	0	0	0.198327	N/A	No	0.193668	0	Yes	3.52526	-4.81949	1.88262	-2.55999	0.0104676	0.0889653	other	intronic	0	1	0	0	0	0	0	0	0	0	0	0	0	0
wt_saf_neg_peak_9631	chr1	165322839	165323350	-	512	13	5	5	4	0	0	0	0	Yes	0.349938	0.148081	0.15025	0.0542865	0	0	0	0	N/A	Yes	0.21609	0	Yes	3.97877	-4.99817	1.84846	-2.70396	0.00685176	0.0666304	other	intronic	0	0	0	0	0	0	0	0	0	0	0	0	0	0
wt_saf_neg_peak_9659	chr1	165387286	165387500	-	215	11	18	5	3	2	0	0	0	Yes	0.296102	0.53309	0.15025	0.0407149	0.0607097	0	0	0	N/A	Yes	0.326481	0.0303549	Yes	6.36853	-3.14445	1.38805	-2.26537	0.0234903	0.150995	protein_coding	intronic	0	0	0	0	0	0	0	0	0	0	0	1	0	0
wt_saf_neg_peak_9679	chr1	165434732	165435032	-	301	8	5	17	4	0	2	0	0	Yes	0.215347	0.148081	0.510851	0.0542865	0	0.0620941	0	0	N/A	Yes	0.291426	0.031047	Yes	5.85806	-2.96953	1.41634	-2.09663	0.0360266	0.201035	protein_coding	intronic	0	0	0	1	0	0	0	0	0	0	0	0	0	0
wt_saf_neg_peak_9695	chr1	165552571	165552796	-	226	9	5	4	0	0	0	0	2	Yes	0.242265	0.148081	0.1202	0	0	0	0	0.132218	N/A	Yes	0.170182	0	Yes	3.12562	-4.64928	1.92697	-2.41273	0.0158333	0.116751	other	intronic	0	0	0	1	0	0	0	0	0	0	0	0	0	0
wt_saf_neg_peak_9705	chr1	165587840	165588158	-	319	18	11	13	7	2	1	0	4	Yes	0.48453	0.325777	0.390651	0.0950014	0.0607097	0.031047	0	0.264436	N/A	Yes	0.400319	0.0458784	Yes	8.03416	-2.86072	1.13957	-2.51035	0.012061	0.0978811	other	intronic	0	0	0	0	0	0	0	0	0	0	0	0	0	0
wt_saf_neg_peak_9811	chr1	166112758	166112845	-	88	9	13	20	16	2	3	0	1	Yes	0.242265	0.38501	0.601001	0.217146	0.0607097	0.0931411	0	0.0661091	N/A	No	0.409425	0.0769254	Yes	8.66346	-2.14039	1.00749	-2.12448	0.0336301	0.192167	protein_coding	intronic	0	0	0	0	0	0	0	0	0	0	0	0	0	0
wt_saf_neg_peak_9892	chr1	168144561	168144885	-	325	1	7	10	4	0	0	0	0	Yes	0.0269183	0.207313	0.300501	0.0542865	0	0	0	0	N/A	Yes	0.178244	0	Yes	3.26736	-4.704	1.98456	-2.3703	0.0177739	0.125863	protein_coding	intronic	0	0	1	0	0	0	0	0	0	0	0	0	0	0
wt_saf_neg_peak_9897	chr1	168161303	168161377	-	75	8	2	5	0	0	0	0	0	Yes	0.215347	0.0592322	0.15025	0	0	0	0	0	N/A	Yes	0.14161	0	Yes	2.61899	-4.39269	2.02652	-2.1676	0.0301891	NA	protein_coding	intronic	0	0	0	0	0	0	0	0	0	0	0	0	0	0
wt_saf_neg_peak_9903	chr1	168179363	168179784	-	422	7	14	26	15	1	2	0	3	Yes	0.188428	0.414626	0.781302	0.203575	0.0303549	0.0620941	0	0.198327	N/A	Yes	0.461452	0.0462245	Yes	9.17593	-3.04938	1.15712	-2.63532	0.00840575	0.0767891	protein_coding	intronic	0	0	0	0	0	0	0	0	0	0	0	0	0	0
wt_saf_neg_peak_9919	chr1	168230233	168230506	-	274	11	5	6	1	0	0	0	0	Yes	0.296102	0.148081	0.1803	0.0135716	0	0	0	0	N/A	Yes	0.208161	0	Yes	3.83281	-4.94271	1.85015	-2.67151	0.007551	0.0712826	protein_coding	intronic	0	0	0	0	0	0	0	0	0	0	0	0	0	0
wt_saf_neg_peak_9934	chr1	168268075	168268223	-	149	11	10	8	14	0	2	0	1	Yes	0.296102	0.296161	0.240401	0.190003	0	0.0620941	0	0.0661091	N/A	No	0.277554	0.031047	Yes	5.5526	-2.89216	1.38862	-2.08276	0.0372729	0.205481	protein_coding	intronic	0	0	0	0	0	0	0	0	0	0	0	0	0	0
wt_saf_neg_peak_9944	chr1	168287774	168287880	-	107	18	11	16	20	4	2	0	3	Yes	0.48453	0.325777	0.480801	0.271433	0.121419	0.0620941	0	0.198327	N/A	No	0.430369	0.0917567	Yes	9.2672	-1.96733	0.937786	-2.09785	0.0359188	0.200658	protein_coding	intronic	0	0	0	0	0	0	0	0	0	0	0	0	0	0
wt_saf_neg_peak_9956	chr1	168319761	168319892	-	132	13	24	13	10	0	0	0	0	Yes	0.349938	0.710787	0.390651	0.135716	0	0	0	0	N/A	Yes	0.483792	0	Yes	8.81422	-6.14156	1.63993	-3.74501	0.000180387	0.00404814	protein_coding	intronic	0	0	0	0	0	0	0	0	0	0	0	0	0	0
wt_saf_neg_peak_10162	chr1	170541933	170542116	-	184	1	5	8	18	0	0	0	0	Yes	0.0269183	0.148081	0.240401	0.244289	0	0	0	0	N/A	No	0.138466	0	Yes	2.54176	-4.34132	2.08277	-2.0844	0.0371239	NA	protein_coding	intronic	0	0	0	0	0	0	0	0	0	0	0	0	0	0
wt_saf_neg_peak_10182	chr1	170696486	170696575	-	90	9	2	5	3	0	0	0	2	Yes	0.242265	0.0592322	0.15025	0.0407149	0	0	0	0.132218	N/A	Yes	0.150583	0	Yes	2.78551	-4.48224	2.00357	-2.23713	0.0252778	NA	other	intronic	0	0	0	1	0	0	0	0	0	0	0	0	0	0
wt_saf_neg_peak_10244	chr1	170804670	170804751	-	82	3	9	6	6	0	0	0	0	Yes	0.080755	0.266545	0.1803	0.0814298	0	0	0	0	N/A	Yes	0.175867	0	Yes	3.20357	-4.67924	1.93131	-2.42284	0.0153999	0.114672	protein_coding	intronic	0	0	0	0	0	0	0	0	0	0	0	1	0	0
wt_saf_neg_peak_10286	chr1	171029569	171029873	-	305	5	6	3	0	0	0	0	0	Yes	0.134592	0.177697	0.0901502	0	0	0	0	0	N/A	Yes	0.134146	0	Yes	2.4482	-4.29531	2.0334	-2.11237	0.0346543	NA	other	intronic	0	0	0	0	0	0	0	0	0	0	0	0	0	0
wt_saf_neg_peak_10322	chr1	171271165	171271503	-	339	20	11	5	0	2	0	0	2	Yes	0.538367	0.325777	0.15025	0	0.0607097	0	0	0.132218	N/A	Yes	0.338131	0.0303549	Yes	6.63711	-3.21088	1.37958	-2.32743	0.0199421	0.135225	other	intronic	0	0	0	0	0	0	0	0	0	0	0	0	0	0
wt_saf_neg_peak_10401	chr1	172190022	172190138	-	117	5	2	6	0	0	0	0	2	Yes	0.134592	0.0592322	0.1803	0	0	0	0	0.132218	N/A	Yes	0.124708	0	Yes	2.3065	-4.20572	2.08134	-2.02068	0.043313	NA	other	intronic	0	0	0	0	0	0	0	0	0	0	0	0	0	0
wt_saf_neg_peak_10406	chr1	172204114	172204562	-	449	16	13	11	7	1	2	0	3	Yes	0.430693	0.38501	0.330551	0.0950014	0.0303549	0.0620941	0	0.198327	N/A	Yes	0.382085	0.0462245	Yes	7.69277	-2.77958	1.14545	-2.42663	0.0152399	0.113901	protein_coding	intronic	0	0	0	0	0	0	0	0	0	0	0	0	0	0
wt_saf_neg_peak_10441	chr1	172386248	172386423	-	176	8	8	7	0	0	0	0	2	Yes	0.215347	0.236929	0.21035	0	0	0	0	0.132218	N/A	Yes	0.220875	0	Yes	4.04751	-5.01907	1.81876	-2.75962	0.00578693	0.0593001	other	intronic	0	0	0	1	0	0	0	0	0	0	1	2	0	0
wt_saf_neg_peak_10459	chr1	174484292	174484707	-	416	8	5	4	0	0	0	0	4	Yes	0.215347	0.148081	0.1202	0	0	0	0	0.264436	N/A	Yes	0.161209	0	Yes	2.9591	-4.56976	1.94587	-2.34845	0.0188519	0.130489	other	intronic	0	0	0	0	0	0	0	0	0	0	0	0	0	0
wt_saf_neg_peak_10491	chr1	175673860	175674694	-	835	16	9	4	0	0	0	0	0	Yes	0.430693	0.266545	0.1202	0	0	0	0	0	N/A	Yes	0.27248	0	Yes	4.99417	-5.327	1.78637	-2.98202	0.00286351	0.0357042	protein_coding	intronic	0	0	0	0	0	0	0	0	0	0	0	0	0	0
wt_saf_neg_peak_10492	chr1	175681197	175681271	-	75	6	6	1	0	0	0	0	0	Yes	0.16151	0.177697	0.0300501	0	0	0	0	0	N/A	Yes	0.123086	0	Yes	2.24057	-4.17059	2.12625	-1.96148	0.0498234	NA	protein_coding	intronic	0	0	0	0	0	0	0	0	0	0	0	0	0	0
wt_saf_neg_peak_10496	chr1	175875956	175876695	-	740	11	12	12	9	0	3	0	3	Yes	0.296102	0.355393	0.360601	0.122145	0	0.0931411	0	0.198327	N/A	Yes	0.337365	0.0465706	Yes	6.88585	-2.58512	1.20126	-2.15201	0.0313962	0.183559	other	intronic	0	0	1	0	0	0	0	0	0	0	0	0	0	0
wt_saf_neg_peak_10537	chr1	176795231	176795305	-	75	9	5	1	8	0	0	0	0	Yes	0.242265	0.148081	0.0300501	0.108573	0	0	0	0	N/A	No	0.140132	0	Yes	2.5644	-4.36687	2.07198	-2.10758	0.0350671	NA	protein_coding	intronic	0	0	0	1	0	0	0	0	0	0	0	0	0	0
wt_saf_neg_peak_10551	chr1	177014118	177014234	-	117	1	7	5	0	0	0	0	1	Yes	0.0269183	0.207313	0.15025	0	0	0	0	0.0661091	N/A	Yes	0.12816	0	Yes	2.33199	-4.21958	2.11654	-1.99362	0.0461932	NA	other	intronic	0	0	0	0	0	0	0	0	0	0	0	0	0	0
wt_saf_neg_peak_10552	chr1	177015478	177015553	-	76	3	7	5	0	0	0	0	0	Yes	0.080755	0.207313	0.15025	0	0	0	0	0	N/A	Yes	0.146106	0	Yes	2.66503	-4.41403	2.00111	-2.20579	0.0273989	NA	other	intronic	0	0	0	0	0	0	0	0	0	0	0	0	0	0
wt_saf_neg_peak_10759	chr1	179025971	179026101	-	131	10	7	7	20	0	1	0	1	Yes	0.269183	0.207313	0.21035	0.271433	0	0.031047	0	0.0661091	N/A	No	0.228949	0.0155235	Yes	4.43832	-3.62701	1.76787	-2.05162	0.0402066	0.215795	protein_coding	intronic	0	0	0	0	0	0	0	0	0	0	0	0	0	0
wt_saf_neg_peak_10768	chr1	179046062	179046136	-	75	9	9	6	1	0	1	0	2	Yes	0.242265	0.266545	0.1803	0.0135716	0	0.031047	0	0.132218	N/A	Yes	0.229703	0.0155235	Yes	4.43618	-3.62645	1.76849	-2.05059	0.0403066	0.216076	protein_coding	intronic	0	0	0	0	0	0	0	0	0	0	0	0	0	0
wt_saf_neg_peak_10798	chr1	179118262	179118502	-	241	13	15	10	8	3	0	0	0	Yes	0.349938	0.444242	0.300501	0.108573	0.0910646	0	0	0	N/A	Yes	0.364894	0.0455323	Yes	7.32892	-2.72972	1.1879	-2.29794	0.0215649	0.142419	protein_coding	intronic	0	1	0	0	0	0	0	0	0	0	0	1	0	0
wt_saf_neg_peak_11070	chr1	180040734	180040922	-	189	9	7	4	6	0	0	0	2	Yes	0.242265	0.207313	0.1202	0.0814298	0	0	0	0.132218	N/A	Yes	0.189926	0	Yes	3.47708	-4.80278	1.88325	-2.55027	0.0107641	0.0906461	other	intronic	0	0	0	0	0	0	0	0	0	0	0	0	0	0
wt_saf_neg_peak_11081	chr1	180225680	180226089	-	410	10	20	11	3	0	0	0	4	Yes	0.269183	0.592322	0.330551	0.0407149	0	0	0	0.264436	N/A	Yes	0.397352	0	Yes	7.23759	-5.85693	1.67861	-3.48915	0.00048456	0.00906161	other	intronic	0	0	0	0	0	0	0	0	0	0	1	0	0	0
wt_saf_neg_peak_11116	chr1	180640047	180640718	-	672	32	31	20	47	8	9	0	0	Yes	0.861387	0.9181	0.601001	0.637867	0.242839	0.279423	0	0	N/A	No	0.793496	0.261131	Yes	18.3725	-1.3319	0.630712	-2.11174	0.0347087	0.196209	other	intronic	0	0	0	0	0	0	0	0	0	0	0	0	0	0
wt_saf_neg_peak_11120	chr1	180763718	180764180	-	463	20	11	14	6	3	3	0	4	Yes	0.538367	0.325777	0.420701	0.0814298	0.0910646	0.0931411	0	0.264436	N/A	Yes	0.428282	0.0921028	Yes	9.24043	-1.95435	0.935059	-2.09008	0.0366104	0.203153	lncRNA	intronic	0	0	0	0	0	0	0	0	0	0	0	0	0	0
wt_saf_neg_peak_11121	chr1	180764713	180764964	-	252	15	11	5	0	0	0	0	1	Yes	0.403775	0.325777	0.15025	0	0	0	0	0.0661091	N/A	Yes	0.293268	0	Yes	5.36619	-5.42966	1.75475	-3.09427	0.00197299	0.0270014	lncRNA	intronic	0	0	0	1	0	0	0	0	0	0	1	2	0	0
wt_saf_neg_peak_11231	chr1	181741839	181742078	-	240	7	5	4	7	0	0	0	2	Yes	0.188428	0.148081	0.1202	0.0950014	0	0	0	0.132218	N/A	No	0.152236	0	Yes	2.79258	-4.48558	1.9677	-2.2796	0.0226311	NA	other	intronic	0	1	0	0	0	0	0	0	0	0	0	0	0	0
wt_saf_neg_peak_11363	chr1	182448898	182449159	-	262	5	7	1	6	0	0	0	0	Yes	0.134592	0.207313	0.0300501	0.0814298	0	0	0	0	N/A	No	0.123985	0	Yes	2.24978	-4.17562	2.12736	-1.96282	0.0496676	NA	other	intronic	0	0	0	0	0	0	0	0	0	0	0	0	0	0
wt_saf_neg_peak_11381	chr1	182500234	182500661	-	428	8	11	9	10	2	0	0	0	Yes	0.215347	0.325777	0.270451	0.135716	0.0607097	0	0	0	N/A	No	0.270525	0.0303549	Yes	5.38717	-2.88062	1.40579	-2.04911	0.0404514	0.216589	protein_coding	intronic	0	0	0	0	0	0	0	0	0	0	0	0	0	0
wt_saf_neg_peak_11491	chr1	184524725	184524875	-	151	3	8	5	0	0	0	0	1	Yes	0.080755	0.236929	0.15025	0	0	0	0	0.0661091	N/A	Yes	0.155978	0	Yes	2.84076	-4.50636	1.97715	-2.27922	0.022654	NA	other	intronic	0	1	0	0	0	0	0	0	0	0	0	0	0	0
wt_saf_neg_peak_11492	chr1	184810527	184810609	-	83	5	4	5	4	0	0	0	0	Yes	0.134592	0.118464	0.15025	0.0542865	0	0	0	0	N/A	Yes	0.134435	0	Yes	2.47089	-4.30632	2.02229	-2.12943	0.033219	NA	protein_coding	intronic	0	0	0	0	0	0	0	0	0	0	0	0	0	0
wt_saf_neg_peak_11567	chr1	185292475	185292816	-	342	27	26	13	45	8	4	0	1	Yes	0.726795	0.770019	0.390651	0.610724	0.242839	0.124188	0	0.0661091	N/A	No	0.629155	0.183513	Yes	14.1842	-1.50863	0.742934	-2.03064	0.0422917	0.222876	protein_coding	intronic	0	0	0	1	0	0	0	0	0	0	0	1	0	0
wt_saf_neg_peak_11614	chr1	185993644	185993729	-	86	10	8	7	3	0	0	0	4	Yes	0.269183	0.236929	0.21035	0.0407149	0	0	0	0.264436	N/A	Yes	0.238821	0	Yes	4.38055	-5.13416	1.7944	-2.86122	0.00422016	0.0473026	other	intronic	0	1	0	0	0	0	0	0	0	0	0	0	0	0
wt_saf_neg_peak_11617	chr1	186039809	186040106	-	298	12	8	2	0	0	0	0	0	Yes	0.32302	0.236929	0.0601001	0	0	0	0	0	N/A	Yes	0.206683	0	Yes	3.77822	-4.92499	1.89268	-2.60213	0.00926477	0.0819487	other	intronic	0	1	0	0	0	0	0	0	0	0	0	0	0	0
wt_saf_neg_peak_11618	chr1	186050090	186050661	-	572	22	14	5	0	0	2	0	0	Yes	0.592203	0.414626	0.15025	0	0	0.0620941	0	0	N/A	Yes	0.385693	0.031047	Yes	7.52601	-3.37035	1.34649	-2.50306	0.0123125	0.0992102	other	intronic	0	1	0	0	0	0	0	0	0	0	0	0	0	0
wt_saf_neg_peak_11620	chr1	186054227	186054552	-	326	12	1	8	0	0	0	0	3	Yes	0.32302	0.0296161	0.240401	0	0	0	0	0.198327	N/A	Yes	0.197679	0	Yes	3.67056	-4.87918	1.94118	-2.51352	0.0119533	0.0973366	other	intronic	0	0	0	0	0	0	0	0	0	0	0	0	0	0
wt_saf_neg_peak_11628	chr1	186074476	186075071	-	596	11	13	9	22	2	0	0	0	Yes	0.296102	0.38501	0.270451	0.298576	0.0607097	0	0	0	N/A	No	0.317187	0.0303549	Yes	6.23818	-3.10962	1.36011	-2.2863	0.0222365	0.145435	other	intronic	0	0	0	2	0	0	0	0	0	0	0	0	0	0
wt_saf_neg_peak_11630	chr1	186084745	186085265	-	521	18	11	3	5	1	1	0	1	Yes	0.48453	0.325777	0.0901502	0.0678582	0.0303549	0.031047	0	0.0661091	N/A	Yes	0.300152	0.0307009	Yes	5.94426	-3.02271	1.40625	-2.14949	0.0315959	0.184261	other	intronic	0	0	0	4	0	0	0	0	0	0	1	0	0	0
wt_saf_neg_peak_11661	chr1	186696957	186697341	-	385	6	6	2	0	0	0	0	0	Yes	0.16151	0.177697	0.0601001	0	0	0	0	0	N/A	Yes	0.133102	0	Yes	2.42764	-4.28507	2.0532	-2.08703	0.0368858	NA	protein_coding	intronic	0	1	0	0	0	0	0	0	0	0	0	1	0	0
wt_saf_neg_peak_11689	chr1	187225572	187226201	-	630	46	66	36	44	21	17	0	4	Yes	1.23824	1.95466	1.0818	0.597152	0.637452	0.5278	0	0.264436	N/A	Yes	1.4249	0.582626	Yes	34.5646	-1.01493	0.47292	-2.14609	0.0318658	0.185371	other	intronic	0	0	0	0	0	0	0	0	0	0	0	0	0	0
wt_saf_neg_peak_11848	chr1	190952245	190952413	-	169	17	15	11	6	1	0	0	3	Yes	0.457612	0.444242	0.330551	0.0814298	0.0303549	0	0	0.198327	N/A	Yes	0.410801	0.0151774	Yes	7.74375	-4.47569	1.63853	-2.73153	0.00630411	0.062784	protein_coding	intronic	0	0	0	0	0	0	0	0	0	0	0	1	0	0
wt_saf_neg_peak_11968	chr1	191821056	191821686	-	631	23	6	15	36	1	4	0	4	Yes	0.619122	0.177697	0.450751	0.488579	0.0303549	0.124188	0	0.264436	N/A	No	0.415856	0.0772715	Yes	8.8436	-2.16906	1.0386	-2.08845	0.0367571	0.203656	lncRNA	exonic	0	0	0	0	0	0	0	0	0	0	0	0	0	0
wt_saf_neg_peak_12038	chr1	192877631	192877912	-	282	20	7	9	5	2	2	0	1	Yes	0.538367	0.207313	0.270451	0.0678582	0.0607097	0.0620941	0	0.0661091	N/A	Yes	0.33871	0.0614019	Yes	7.14949	-2.20567	1.11461	-1.97888	0.0478298	0.240949	other	intronic	0	0	0	0	0	0	0	0	0	0	0	1	0	0
wt_saf_neg_peak_12074	chr1	192953059	192953292	-	234	8	2	5	13	0	0	0	0	Yes	0.215347	0.0592322	0.15025	0.176431	0	0	0	0	N/A	No	0.14161	0	Yes	2.61899	-4.39269	2.02652	-2.1676	0.0301891	NA	protein_coding	intronic	0	1	0	0	0	0	0	0	0	0	0	0	0	0
wt_saf_neg_peak_12149	chr1	195087775	195087930	-	156	5	5	7	0	0	0	0	0	Yes	0.134592	0.148081	0.21035	0	0	0	0	0	N/A	Yes	0.164341	0	Yes	3.02076	-4.5946	1.93449	-2.3751	0.0175444	0.124878	protein_coding	intronic	0	2	0	0	0	0	0	0	0	0	0	0	0	0
wt_saf_neg_peak_12150	chr1	195088558	195088658	-	101	11	5	2	0	0	0	0	2	Yes	0.296102	0.148081	0.0601001	0	0	0	0	0.132218	N/A	Yes	0.168094	0	Yes	3.08451	-4.63288	1.9682	-2.35387	0.0185791	0.129283	protein_coding	intronic	0	0	0	1	0	0	0	0	0	0	0	0	0	0
wt_saf_neg_peak_12171	chr10	3118026	3118295	-	270	6	13	7	5	0	0	0	3	Yes	0.16151	0.38501	0.21035	0.0678582	0	0	0	0.198327	N/A	Yes	0.25229	0	Yes	4.59312	-5.20072	1.79479	-2.89767	0.00375941	0.0436176	other	exonic	0	0	0	0	0	0	0	0	0	0	0	0	0	0
wt_saf_neg_peak_12202	chr10	4044127	4044727	-	601	13	23	2	2	0	3	0	4	Yes	0.349938	0.681171	0.0601001	0.0271433	0	0.0931411	0	0.264436	N/A	Yes	0.363736	0.0465706	Yes	7.28117	-2.67528	1.29705	-2.06259	0.0391519	0.21216	other	intronic	0	1	0	0	0	0	0	0	0	0	0	1	0	0
wt_saf_neg_peak_12208	chr10	4221872	4221995	-	124	6	9	3	0	0	0	0	0	Yes	0.16151	0.266545	0.0901502	0	0	0	0	0	N/A	Yes	0.172735	0	Yes	3.1419	-4.65565	1.93449	-2.40666	0.0160991	0.118033	other	intronic	0	0	0	0	0	0	0	0	0	0	0	2	0	0
wt_saf_neg_peak_12212	chr10	4234333	4234534	-	202	7	13	9	3	1	0	0	2	Yes	0.188428	0.38501	0.270451	0.0407149	0.0303549	0	0	0.132218	N/A	Yes	0.281296	0.0151774	Yes	5.35294	-3.92226	1.72562	-2.27296	0.0230286	0.148994	other	intronic	0	0	1	0	0	0	0	0	0	0	0	1	0	0
wt_saf_neg_peak_12245	chr10	4398896	4399173	-	278	4	11	7	10	0	0	0	0	Yes	0.107673	0.325777	0.21035	0.135716	0	0	0	0	N/A	No	0.2146	0	Yes	3.90862	-4.96662	1.85375	-2.67923	0.00737922	0.0701144	other	intronic	0	0	0	1	0	0	0	0	0	0	0	0	0	0
wt_saf_neg_peak_12392	chr10	5904910	5905472	-	563	15	3	17	0	0	3	0	2	Yes	0.403775	0.0888483	0.510851	0	0	0.0931411	0	0.132218	N/A	Yes	0.334491	0.0465706	Yes	6.90574	-2.58641	1.27685	-2.02562	0.0428038	0.224689	protein_coding	intronic	0	0	0	0	0	0	0	0	0	0	1	0	0	0
wt_saf_neg_peak_12465	chr10	7474127	7474201	-	75	7	6	6	3	0	0	0	4	Yes	0.188428	0.177697	0.1803	0.0407149	0	0	0	0.264436	N/A	Yes	0.182142	0	Yes	3.34246	-4.74301	1.88818	-2.51194	0.012007	0.0976167	other	intronic	0	0	0	0	0	0	0	0	0	0	0	1	0	0
wt_saf_neg_peak_12509	chr10	7776326	7776741	-	416	10	13	12	40	1	1	0	0	Yes	0.269183	0.38501	0.360601	0.542865	0.0303549	0.031047	0	0	N/A	No	0.338265	0.0307009	Yes	6.64722	-3.18918	1.32387	-2.40898	0.0159972	0.117577	protein_coding	intronic	0	0	0	0	0	0	0	0	0	0	0	1	0	0
wt_saf_neg_peak_12558	chr10	8284128	8284454	-	327	8	2	5	0	0	0	0	4	Yes	0.215347	0.0592322	0.15025	0	0	0	0	0.264436	N/A	Yes	0.14161	0	Yes	2.61899	-4.39269	2.02652	-2.1676	0.0301891	NA	protein_coding	intronic	0	0	0	1	0	0	0	0	0	0	0	0	0	0
wt_saf_neg_peak_12586	chr10	8464395	8464660	-	266	6	6	3	0	0	0	0	0	Yes	0.16151	0.177697	0.0901502	0	0	0	0	0	N/A	Yes	0.143119	0	Yes	2.61472	-4.39098	2.00292	-2.19229	0.0283588	NA	protein_coding	intronic	0	1	0	2	0	0	0	0	0	0	0	0	0	0
wt_saf_neg_peak_12618	chr10	8743951	8744078	-	128	25	16	18	18	2	5	0	4	Yes	0.672958	0.473858	0.540901	0.244289	0.0607097	0.155235	0	0.264436	N/A	Yes	0.562572	0.107972	Yes	11.9478	-2.1149	0.849442	-2.48975	0.0127831	0.101508	protein_coding	intronic	0	0	0	2	0	0	0	0	0	0	0	0	0	0
wt_saf_neg_peak_12677	chr10	8856089	8856236	-	148	8	10	17	23	1	3	0	2	Yes	0.215347	0.296161	0.510851	0.312148	0.0303549	0.0931411	0	0.132218	N/A	No	0.340786	0.061748	Yes	7.18937	-2.19326	1.11473	-1.96753	0.0491222	0.245156	protein_coding	intronic	0	0	0	0	0	0	0	0	0	0	0	0	0	0
wt_saf_neg_peak_12699	chr10	9409083	9410001	-	919	7	11	13	0	0	0	0	3	Yes	0.188428	0.325777	0.390651	0	0	0	0	0.198327	N/A	Yes	0.301619	0	Yes	5.53062	-5.46632	1.73834	-3.14457	0.00166334	0.0236847	other	intronic	1	0	0	0	0	0	0	0	0	0	0	0	0	0
wt_saf_neg_peak_12702	chr10	9552061	9552180	-	120	8	3	5	0	0	0	0	4	Yes	0.215347	0.0888483	0.15025	0	0	0	0	0.264436	N/A	Yes	0.151482	0	Yes	2.79472	-4.48637	1.98044	-2.26535	0.0234914	NA	other	intronic	0	1	0	0	0	0	0	0	0	0	0	0	0	0
wt_saf_neg_peak_12713	chr10	9770999	9771271	-	273	9	4	10	4	1	0	0	0	Yes	0.242265	0.118464	0.300501	0.0542865	0.0303549	0	0	0	N/A	Yes	0.22041	0.0151774	Yes	4.2915	-3.58859	1.79589	-1.99822	0.0456926	0.233946	protein_coding	intronic	0	0	1	0	0	0	0	0	0	0	0	0	0	0
wt_saf_neg_peak_12770	chr10	9889822	9890303	-	482	15	6	11	0	1	2	0	0	Yes	0.403775	0.177697	0.330551	0	0.0303549	0.0620941	0	0	N/A	Yes	0.304007	0.0462245	Yes	6.29615	-2.45756	1.21894	-2.01615	0.0437843	0.227898	protein_coding	intronic	0	0	0	0	0	0	0	0	0	0	0	1	0	0
wt_saf_neg_peak_12796	chr10	12349224	12349621	-	398	7	12	10	3	0	0	0	4	Yes	0.188428	0.355393	0.300501	0.0407149	0	0	0	0.264436	N/A	Yes	0.281441	0	Yes	5.14513	-5.36338	1.75394	-3.0579	0.00222892	0.0295627	other	intronic	0	0	1	0	0	0	0	0	0	0	0	2	0	0
wt_saf_neg_peak_12881	chr10	12561111	12561748	-	638	23	38	30	68	12	7	0	4	Yes	0.619122	1.12541	0.901502	0.922871	0.364258	0.217329	0	0.264436	N/A	No	0.882012	0.290794	Yes	20.3843	-1.32723	0.613335	-2.16396	0.0304674	0.180016	protein_coding	intronic	0	0	0	0	0	0	0	0	0	0	1	2	0	0
wt_saf_neg_peak_12926	chr10	12644074	12644161	-	88	16	10	8	15	0	3	0	2	Yes	0.430693	0.296161	0.240401	0.203575	0	0.0931411	0	0.132218	N/A	No	0.322418	0.0465706	Yes	6.6187	-2.52437	1.22384	-2.06266	0.0391445	0.212144	protein_coding	intronic	0	0	0	0	0	0	0	0	0	0	0	1	0	0
wt_saf_neg_peak_13033	chr10	12918855	12919179	-	325	8	11	1	1	0	0	0	1	Yes	0.215347	0.325777	0.0300501	0.0135716	0	0	0	0.0661091	N/A	Yes	0.190391	0	Yes	3.45225	-4.79359	1.95746	-2.44888	0.0143301	0.109582	lncRNA	intronic	0	0	1	0	0	0	0	0	0	0	0	2	0	0
wt_saf_neg_peak_13041	chr10	12961050	12961176	-	127	7	8	1	11	0	0	0	0	Yes	0.188428	0.236929	0.0300501	0.149288	0	0	0	0	N/A	No	0.151802	0	Yes	2.75854	-4.47041	2.03664	-2.19499	0.0281643	NA	protein_coding	intronic	0	0	0	0	0	0	0	0	0	0	0	0	0	0
wt_saf_neg_peak_13047	chr10	13128805	13129007	-	203	43	53	30	112	7	8	0	2	Yes	1.15749	1.56965	0.901502	1.52002	0.212484	0.248376	0	0.132218	N/A	No	1.20955	0.23043	Yes	25.4883	-2.11726	0.59209	-3.57591	0.000349006	0.00697741	other	intronic	0	0	1	0	0	0	0	0	0	0	0	0	0	0
wt_saf_neg_peak_13060	chr10	13215713	13215977	-	265	15	13	5	2	0	0	0	0	Yes	0.403775	0.38501	0.15025	0.0271433	0	0	0	0	N/A	Yes	0.313012	0	Yes	5.71764	-5.52096	1.7401	-3.17279	0.0015098	0.0220213	protein_coding	intronic	0	0	0	0	0	0	0	0	0	0	0	0	0	0
wt_saf_neg_peak_13074	chr10	13270678	13270840	-	163	9	7	2	0	0	0	0	0	Yes	0.242265	0.207313	0.0601001	0	0	0	0	0	N/A	Yes	0.169893	0	Yes	3.10293	-4.64032	1.95536	-2.37313	0.0176381	0.125312	protein_coding	intronic	0	0	0	0	0	0	0	0	0	0	0	0	0	0
wt_saf_neg_peak_13080	chr10	13289972	13290345	-	374	24	12	2	7	0	0	0	0	Yes	0.64604	0.355393	0.0601001	0.0950014	0	0	0	0	N/A	Yes	0.353845	0	Yes	6.47937	-5.70353	1.77391	-3.21523	0.00130338	0.0196594	protein_coding	intronic	0	0	1	0	0	0	0	0	0	0	0	0	0	0
wt_saf_neg_peak_13097	chr10	13423984	13424851	-	868	11	14	16	8	0	0	0	0	Yes	0.296102	0.414626	0.480801	0.108573	0	0	0	0	N/A	Yes	0.397176	0	Yes	7.28511	-5.86472	1.66854	-3.51488	0.000439955	0.00839153	protein_coding	intronic	0	0	0	0	0	0	0	0	0	0	0	1	0	0
wt_saf_neg_peak_13111	chr10	13525647	13526233	-	587	18	20	20	39	0	5	0	4	Yes	0.48453	0.592322	0.601001	0.529294	0	0.155235	0	0.264436	N/A	No	0.559285	0.0776176	Yes	11.4209	-2.57619	0.954187	-2.69989	0.00693633	0.0671651	protein_coding	intronic	0	1	0	0	0	0	0	0	0	0	0	1	0	0
wt_saf_neg_peak_13128	chr10	13655443	13655671	-	229	6	11	6	5	0	0	0	2	Yes	0.16151	0.325777	0.1803	0.0678582	0	0	0	0.132218	N/A	Yes	0.222529	0	Yes	4.05458	-5.02126	1.8297	-2.74431	0.00606377	0.0611856	protein_coding	intronic	0	0	0	1	0	0	0	0	0	0	0	0	0	0
wt_saf_neg_peak_13139	chr10	13687082	13687528	-	447	11	4	9	5	0	0	0	0	Yes	0.296102	0.118464	0.270451	0.0678582	0	0	0	0	N/A	Yes	0.228339	0	Yes	4.2183	-5.07886	1.82614	-2.7812	0.0054158	0.0564951	protein_coding	intronic	0	0	0	0	0	0	0	0	0	0	0	0	0	0
wt_saf_neg_peak_13183	chr10	13792314	13793080	-	767	16	45	27	29	11	8	0	2	Yes	0.430693	1.33273	0.811352	0.393577	0.333903	0.248376	0	0.132218	N/A	Yes	0.858257	0.29114	Yes	19.9019	-1.2793	0.652538	-1.9605	0.0499373	0.247599	protein_coding	intronic	0	0	0	0	0	0	0	0	0	0	0	0	0	0
wt_saf_neg_peak_13186	chr10	13797619	13797736	-	118	10	9	8	4	0	2	0	3	Yes	0.269183	0.266545	0.240401	0.0542865	0	0.0620941	0	0.198327	N/A	Yes	0.25871	0.031047	Yes	5.21035	-2.79057	1.40824	-1.98161	0.0475233	0.239939	protein_coding	intronic	0	0	0	0	0	0	0	0	0	0	0	1	0	0
wt_saf_neg_peak_13252	chr10	14479929	14480254	-	326	6	2	9	13	0	0	0	4	Yes	0.16151	0.0592322	0.270451	0.176431	0	0	0	0.264436	N/A	No	0.163731	0	Yes	3.03424	-4.60012	1.97175	-2.33302	0.0196473	0.133968	protein_coding	intronic	0	0	0	0	0	0	0	0	0	0	0	0	0	0
wt_saf_neg_peak_13255	chr10	14496104	14496313	-	210	10	5	7	0	0	0	0	1	Yes	0.269183	0.148081	0.21035	0	0	0	0	0.0661091	N/A	Yes	0.209205	0	Yes	3.85336	-4.94918	1.84435	-2.68343	0.00728715	0.0695376	protein_coding	intronic	0	0	0	0	0	0	0	0	0	0	0	0	0	0
wt_saf_neg_peak_13258	chr10	14498491	14498866	-	376	25	8	23	2	3	0	0	2	Yes	0.672958	0.236929	0.691151	0.0271433	0.0910646	0	0	0.132218	N/A	Yes	0.53368	0.0455323	Yes	10.529	-3.2921	1.13378	-2.90364	0.00368851	0.0430269	protein_coding	intronic	0	0	0	0	0	0	0	0	0	0	0	0	0	0
wt_saf_neg_peak_13299	chr10	14687598	14688481	-	884	14	28	26	17	3	8	1	3	Yes	0.376857	0.829251	0.781302	0.230718	0.0910646	0.248376	0.0696843	0.198327	N/A	Yes	0.66247	0.16972	Yes	14.6411	-1.68449	0.764024	-2.20477	0.0274706	0.167995	protein_coding	intronic	0	1	0	0	0	0	0	0	0	0	0	0	0	0
wt_saf_neg_peak_13311	chr10	15259257	15260159	-	903	15	29	16	6	6	4	0	1	Yes	0.403775	0.858867	0.480801	0.0814298	0.182129	0.124188	0	0.0661091	N/A	Yes	0.581148	0.153159	Yes	12.8361	-1.64578	0.787465	-2.08998	0.03662	0.203198	other	intronic	0	1	0	0	0	0	0	0	0	0	0	0	0	0
wt_saf_neg_peak_13387	chr10	18227985	18228116	-	132	7	6	3	1	0	0	0	1	Yes	0.188428	0.177697	0.0901502	0.0135716	0	0	0	0.0661091	N/A	Yes	0.152092	0	Yes	2.78124	-4.48069	1.97715	-2.26623	0.0234373	NA	protein_coding	intronic	0	0	0	0	0	0	0	0	0	0	0	1	0	0
wt_saf_neg_peak_13397	chr10	18406903	18407207	-	305	13	2	5	0	0	0	0	1	Yes	0.349938	0.0592322	0.15025	0	0	0	0	0.0661091	N/A	Yes	0.186474	0	Yes	3.45159	-4.79326	1.93689	-2.47472	0.0133342	0.104423	other	intronic	0	0	0	0	0	0	0	0	0	0	0	1	0	0
wt_saf_neg_peak_13414	chr10	18598272	18598495	-	224	6	7	1	6	0	0	0	0	Yes	0.16151	0.207313	0.0300501	0.0814298	0	0	0	0	N/A	No	0.132958	0	Yes	2.4163	-4.27917	2.09252	-2.04498	0.0408565	NA	protein_coding	intronic	0	0	0	1	0	0	0	0	0	0	0	0	0	0
wt_saf_neg_peak_13450	chr10	19011478	19011770	-	293	10	9	5	0	1	0	0	0	Yes	0.269183	0.266545	0.15025	0	0.0303549	0	0	0	N/A	Yes	0.22866	0.0151774	Yes	4.40129	-3.63098	1.77724	-2.04304	0.0410484	0.21848	protein_coding	exonic	0	0	0	0	0	0	0	0	0	0	0	0	0	0
wt_saf_neg_peak_13522	chr10	21128308	21128408	-	101	4	9	6	0	0	0	0	0	Yes	0.107673	0.266545	0.1803	0	0	0	0	0	N/A	Yes	0.18484	0	Yes	3.37009	-4.75307	1.90037	-2.50112	0.0123801	0.0994701	protein_coding	intronic	0	0	0	0	0	0	0	0	0	0	0	0	0	0
wt_saf_neg_peak_13560	chr10	21847352	21847539	-	188	6	7	1	0	0	0	0	2	Yes	0.16151	0.207313	0.0300501	0	0	0	0	0.132218	N/A	Yes	0.132958	0	Yes	2.4163	-4.27917	2.09252	-2.04498	0.0408565	NA	other	intronic	0	0	0	0	0	0	0	0	0	0	0	0	0	0
wt_saf_neg_peak_13562	chr10	21992845	21993549	-	705	6	23	2	9	0	2	0	3	Yes	0.16151	0.681171	0.0601001	0.122145	0	0.0620941	0	0.198327	N/A	No	0.300927	0.031047	Yes	5.88203	-2.98001	1.4919	-1.99746	0.0457749	0.234231	other	intronic	0	0	0	0	0	0	0	0	0	0	1	0	0	0
wt_saf_neg_peak_13612	chr10	23540021	23540108	-	88	7	23	13	2	2	1	0	0	Yes	0.188428	0.681171	0.390651	0.0271433	0.0607097	0.031047	0	0	N/A	Yes	0.420083	0.0458784	Yes	8.31119	-2.91126	1.16753	-2.49352	0.0126485	0.100895	other	intronic	0	0	1	0	0	0	0	0	0	0	0	0	0	0
wt_saf_neg_peak_13758	chr10	26074581	26074917	-	337	5	7	4	5	0	0	0	0	Yes	0.134592	0.207313	0.1202	0.0678582	0	0	0	0	N/A	No	0.154035	0	Yes	2.811	-4.49357	1.9664	-2.28517	0.0223027	NA	protein_coding	intronic	0	0	0	1	0	0	0	0	0	0	0	0	0	0
wt_saf_neg_peak_13759	chr10	26075600	26076149	-	550	14	15	4	2	0	0	0	3	Yes	0.376857	0.444242	0.1202	0.0271433	0	0	0	0.198327	N/A	Yes	0.313766	0	Yes	5.71551	-5.52041	1.75165	-3.15155	0.00162405	0.0232767	protein_coding	intronic	0	0	0	0	0	0	0	0	0	0	0	1	0	0
wt_saf_neg_peak_13780	chr10	26330174	26330311	-	138	6	10	5	23	0	0	0	1	Yes	0.16151	0.296161	0.15025	0.312148	0	0	0	0.0661091	N/A	No	0.20264	0	Yes	3.69178	-4.88667	1.86186	-2.62462	0.00867452	0.0784145	protein_coding	exonic	0	0	0	0	0	0	0	0	0	0	0	0	0	0
wt_saf_neg_peak_13787	chr10	26340865	26341082	-	218	16	26	25	41	5	2	0	0	Yes	0.430693	0.770019	0.751252	0.556437	0.151774	0.0620941	0	0	N/A	No	0.650655	0.106934	Yes	13.4729	-2.33196	0.831184	-2.80558	0.00502254	0.053611	protein_coding	exonic	0	0	0	0	0	0	0	0	0	0	0	0	0	0
wt_saf_neg_peak_13794	chr10	26355618	26356227	-	610	18	9	11	16	0	3	0	4	Yes	0.48453	0.266545	0.330551	0.217146	0	0.0931411	0	0.264436	N/A	No	0.360542	0.0465706	Yes	7.33723	-2.6898	1.19393	-2.25289	0.0242663	0.154405	protein_coding	intronic	0	0	0	1	0	0	0	0	0	0	0	0	0	0
wt_saf_neg_peak_13795	chr10	26356610	26357255	-	646	10	15	10	10	3	1	0	4	Yes	0.269183	0.444242	0.300501	0.135716	0.0910646	0.031047	0	0.264436	N/A	Yes	0.337975	0.0610558	Yes	7.06286	-2.19433	1.10304	-1.98935	0.0466622	0.237116	protein_coding	intronic	0	0	0	0	0	0	0	0	0	0	4	1	0	0
wt_saf_neg_peak_13796	chr10	26358974	26359280	-	307	10	7	6	16	0	1	0	0	Yes	0.269183	0.207313	0.1803	0.217146	0	0.031047	0	0	N/A	No	0.218932	0.0155235	Yes	4.25124	-3.56189	1.78216	-1.99864	0.0456472	0.233815	protein_coding	intronic	0	0	0	0	0	0	0	0	0	0	0	0	0	0
wt_saf_neg_peak_13800	chr10	26363704	26364396	-	693	24	7	14	29	4	0	0	1	Yes	0.64604	0.207313	0.420701	0.393577	0.121419	0	0	0.0661091	N/A	No	0.424685	0.0607097	Yes	8.72226	-2.55299	1.11102	-2.29787	0.0215689	0.142439	protein_coding	intronic	0	0	0	0	0	0	0	0	0	0	0	0	0	0
wt_saf_neg_peak_13809	chr10	26456887	26457361	-	475	5	9	6	3	0	0	0	1	Yes	0.134592	0.266545	0.1803	0.0407149	0	0	0	0.0661091	N/A	Yes	0.193812	0	Yes	3.53661	-4.82333	1.87545	-2.57182	0.0101165	0.0869922	other	intronic	0	0	0	3	0	0	0	0	0	0	0	0	0	0
wt_saf_neg_peak_13811	chr10	26466987	26467379	-	393	5	5	3	0	0	0	0	0	Yes	0.134592	0.148081	0.0901502	0	0	0	0	0	N/A	Yes	0.124274	0	Yes	2.27247	-4.18793	2.06773	-2.02537	0.0428294	NA	other	intronic	0	1	0	0	0	0	0	0	0	0	1	0	0	0
wt_saf_neg_peak_13816	chr10	26930843	26931238	-	396	11	10	7	6	1	0	0	0	Yes	0.296102	0.296161	0.21035	0.0814298	0.0303549	0	0	0	N/A	Yes	0.267538	0.0151774	Yes	5.11769	-3.85757	1.73036	-2.22934	0.0257912	0.160836	other	intronic	0	0	0	1	0	0	0	0	0	0	0	0	0	0
wt_saf_neg_peak_13832	chr10	28269597	28269901	-	305	14	19	2	2	1	0	0	3	Yes	0.376857	0.562706	0.0601001	0.0271433	0.0303549	0	0	0.198327	N/A	Yes	0.333221	0.0151774	Yes	6.26344	-4.16341	1.7511	-2.3776	0.0174257	0.124392	other	intronic	0	1	0	0	0	0	0	0	0	0	2	0	0	0
wt_saf_neg_peak_13840	chr10	29300038	29300384	-	347	8	5	14	0	0	2	0	1	Yes	0.215347	0.148081	0.420701	0	0	0.0620941	0	0.0661091	N/A	Yes	0.261376	0.031047	Yes	5.29684	-2.81129	1.43388	-1.96062	0.0499232	0.247554	lncRNA	intronic	0	0	0	1	0	0	0	0	0	0	0	0	0	0
wt_saf_neg_peak_13867	chr10	30130153	30130241	-	89	6	7	1	0	0	0	0	2	Yes	0.16151	0.207313	0.0300501	0	0	0	0	0.132218	N/A	Yes	0.132958	0	Yes	2.4163	-4.27917	2.09252	-2.04498	0.0408565	NA	other	intronic	0	0	0	0	1	0	0	0	0	0	0	0	0	0
wt_saf_neg_peak_13884	chr10	30512158	30512438	-	281	8	1	6	0	0	0	0	3	Yes	0.215347	0.0296161	0.1803	0	0	0	0	0.198327	N/A	Yes	0.141754	0	Yes	2.63033	-4.39785	2.05998	-2.1349	0.0327693	NA	other	exonic	0	1	0	0	0	0	0	0	0	0	0	0	0	0
wt_saf_neg_peak_13891	chr10	30533915	30534449	-	535	19	10	26	4	4	0	0	0	Yes	0.511448	0.296161	0.781302	0.0542865	0.121419	0	0	0	N/A	Yes	0.529637	0.0607097	Yes	10.6617	-2.86508	1.0487	-2.73202	0.00629479	0.0627301	protein_coding	UTR3	0	0	0	0	0	0	0	0	0	0	1	1	0	0
wt_saf_neg_peak_13941	chr10	30676539	30676691	-	153	17	3	12	6	0	0	0	0	Yes	0.457612	0.0888483	0.360601	0.0814298	0	0	0	0	N/A	Yes	0.302354	0	Yes	5.60291	-5.48907	1.77586	-3.09093	0.00199528	0.0272177	protein_coding	intronic	0	0	0	0	0	0	0	0	0	0	0	0	0	0
wt_saf_neg_peak_13960	chr10	30741265	30741522	-	258	9	10	5	3	0	0	0	0	Yes	0.242265	0.296161	0.15025	0.0407149	0	0	0	0	N/A	Yes	0.229559	0	Yes	4.19134	-5.07129	1.81598	-2.7926	0.00522871	0.055146	protein_coding	exonic	0	0	0	0	0	0	0	0	0	0	0	0	0	0
wt_saf_neg_peak_13962	chr10	30751556	30752643	-	1088	47	36	47	43	12	7	4	0	Yes	1.26516	1.06618	1.41235	0.58358	0.364258	0.217329	0.278737	0	N/A	Yes	1.2479	0.290794	Yes	27.2096	-1.83669	0.552412	-3.32485	0.00088466	0.0146079	protein_coding	intronic	0	1	0	0	0	0	0	0	0	0	0	1	0	0
wt_saf_neg_peak_13995	chr10	31355564	31355640	-	77	6	7	1	0	0	0	0	0	Yes	0.16151	0.207313	0.0300501	0	0	0	0	0	N/A	Yes	0.132958	0	Yes	2.4163	-4.27917	2.09252	-2.04498	0.0408565	NA	protein_coding	intronic	0	0	0	0	0	0	0	0	0	0	0	0	0	0
wt_saf_neg_peak_13999	chr10	31378627	31378701	-	75	10	5	2	3	0	0	0	1	Yes	0.269183	0.148081	0.0601001	0.0407149	0	0	0	0.0661091	N/A	Yes	0.159121	0	Yes	2.91799	-4.55254	1.986	-2.29231	0.0218875	NA	protein_coding	intronic	0	0	0	0	0	0	0	0	0	0	0	0	0	0
wt_saf_neg_peak_14040	chr10	31536830	31537206	-	377	2	12	5	15	0	0	0	1	Yes	0.0538367	0.355393	0.15025	0.203575	0	0	0	0.0661091	N/A	No	0.186493	0	Yes	3.37716	-4.75591	1.94619	-2.4437	0.0145373	0.110561	protein_coding	intronic	0	1	0	0	0	0	0	0	0	0	0	0	0	0
wt_saf_neg_peak_14041	chr10	31537855	31538021	-	167	4	7	5	6	0	0	0	0	Yes	0.107673	0.207313	0.15025	0.0814298	0	0	0	0	N/A	No	0.155079	0	Yes	2.83155	-4.50235	1.96497	-2.29131	0.0219455	NA	protein_coding	intronic	0	0	0	0	0	0	0	0	0	0	0	0	0	0
wt_saf_neg_peak_14047	chr10	31552831	31552955	-	125	12	1	7	1	0	0	0	3	Yes	0.32302	0.0296161	0.21035	0.0135716	0	0	0	0.198327	N/A	Yes	0.187662	0	Yes	3.48349	-4.80443	1.95989	-2.45138	0.0142311	0.109048	protein_coding	intronic	0	0	0	0	0	0	0	0	0	0	0	0	0	0
wt_saf_neg_peak_14067	chr10	31597256	31597420	-	165	11	15	6	9	0	2	0	0	Yes	0.296102	0.444242	0.1803	0.122145	0	0.0620941	0	0	N/A	Yes	0.306881	0.031047	Yes	6.0571	-3.02983	1.37946	-2.19639	0.0280643	0.170472	protein_coding	intronic	0	0	0	1	0	0	0	0	0	0	0	0	0	0
wt_saf_neg_peak_14081	chr10	32526834	32527152	-	319	8	8	4	0	0	0	0	2	Yes	0.215347	0.236929	0.1202	0	0	0	0	0.132218	N/A	Yes	0.190825	0	Yes	3.48629	-4.80601	1.88149	-2.55437	0.0106381	0.0899407	protein_coding	intronic	0	1	0	0	0	0	0	0	0	0	0	0	0	0
wt_saf_neg_peak_14083	chr10	32662943	32663517	-	575	9	13	9	0	2	0	0	3	Yes	0.242265	0.38501	0.270451	0	0.0607097	0	0	0.198327	N/A	Yes	0.299242	0.0303549	Yes	5.90514	-3.02404	1.37884	-2.19318	0.0282944	0.171366	protein_coding	intronic	0	1	0	0	0	0	0	0	0	0	0	0	0	0
wt_saf_neg_peak_14085	chr10	32685303	32685733	-	431	2	6	11	1	0	0	0	0	Yes	0.0538367	0.177697	0.330551	0.0135716	0	0	0	0	N/A	Yes	0.187361	0	Yes	3.44523	-4.78032	1.93504	-2.4704	0.0134962	0.105238	protein_coding	intronic	0	1	0	0	0	0	0	0	0	0	0	0	0	0
wt_saf_neg_peak_14087	chr10	32693486	32693703	-	218	4	6	5	4	0	0	0	0	Yes	0.107673	0.177697	0.15025	0.0542865	0	0	0	0	N/A	Yes	0.145207	0	Yes	2.65582	-4.40977	1.99074	-2.21514	0.0267503	NA	protein_coding	intronic	0	1	0	0	0	0	0	0	0	0	0	0	0	0
wt_saf_neg_peak_14098	chr10	32794515	32794834	-	320	14	12	11	11	0	2	0	3	Yes	0.376857	0.355393	0.330551	0.149288	0	0.0620941	0	0.198327	N/A	Yes	0.354267	0.031047	Yes	6.96484	-3.24751	1.32248	-2.45562	0.0140641	0.108173	protein_coding	intronic	0	0	0	1	0	0	0	0	0	0	0	0	0	0
wt_saf_neg_peak_14145	chr10	33569021	33569181	-	161	9	5	2	4	0	0	0	0	Yes	0.242265	0.148081	0.0601001	0.0542865	0	0	0	0	N/A	Yes	0.150149	0	Yes	2.75147	-4.46744	2.00628	-2.22673	0.0259655	NA	protein_coding	intronic	0	1	0	0	0	0	0	0	0	0	0	0	0	0
wt_saf_neg_peak_14159	chr10	33871483	33872082	-	600	12	1	6	4	0	0	0	3	Yes	0.32302	0.0296161	0.1803	0.0542865	0	0	0	0.198327	N/A	Yes	0.177646	0	Yes	3.29641	-4.7256	1.98155	-2.3848	0.0170883	0.122787	other	intronic	0	0	0	1	0	0	0	0	0	0	0	0	0	0
wt_saf_neg_peak_14288	chr10	36020145	36020261	-	117	6	7	1	0	0	0	0	4	Yes	0.16151	0.207313	0.0300501	0	0	0	0	0.264436	N/A	Yes	0.132958	0	Yes	2.4163	-4.27917	2.09252	-2.04498	0.0408565	NA	other	intronic	0	0	0	0	0	0	0	0	0	0	0	0	0	0
wt_saf_neg_peak_14312	chr10	39622305	39622670	-	366	11	5	7	8	0	1	0	0	Yes	0.296102	0.148081	0.21035	0.108573	0	0.031047	0	0	N/A	No	0.218178	0.0155235	Yes	4.25338	-3.56229	1.78925	-1.99094	0.0464871	0.236513	lncRNA	exonic	0	0	0	0	0	0	0	0	0	0	0	0	0	0
wt_saf_neg_peak_14366	chr10	39809901	39810218	-	318	7	6	5	0	0	0	0	0	Yes	0.188428	0.177697	0.15025	0	0	0	0	0	N/A	Yes	0.172125	0	Yes	3.15538	-4.66077	1.91204	-2.4376	0.0147853	0.111704	other	intronic	0	0	0	2	0	0	0	0	0	0	0	0	0	0
wt_saf_neg_peak_14491	chr10	41209109	41209275	-	167	6	9	3	0	0	0	0	0	Yes	0.16151	0.266545	0.0901502	0	0	0	0	0	N/A	Yes	0.172735	0	Yes	3.1419	-4.65565	1.93449	-2.40666	0.0160991	0.118033	protein_coding	intronic	0	1	0	0	0	0	0	0	0	0	0	0	0	0
wt_saf_neg_peak_14492	chr10	41209723	41209797	-	75	3	5	5	0	0	0	0	2	Yes	0.080755	0.148081	0.15025	0	0	0	0	0.132218	N/A	Yes	0.126362	0	Yes	2.31358	-4.20951	2.06276	-2.04072	0.0412791	NA	protein_coding	intronic	0	0	0	0	0	0	0	0	0	0	0	0	0	0
wt_saf_neg_peak_14747	chr10	42541353	42541461	-	109	11	7	2	2	0	0	0	0	Yes	0.296102	0.207313	0.0601001	0.0271433	0	0	0	0	N/A	Yes	0.187838	0	Yes	3.43597	-4.78801	1.9231	-2.48974	0.0127837	0.101508	other	intronic	0	0	0	0	0	0	0	0	0	0	1	1	0	0
wt_saf_neg_peak_14760	chr10	43017212	43017623	-	412	15	4	7	4	0	0	0	2	Yes	0.403775	0.118464	0.21035	0.0542865	0	0	0	0.132218	N/A	Yes	0.244197	0	Yes	4.51023	-5.17827	1.81764	-2.84889	0.00438717	0.0486389	protein_coding	intronic	0	0	0	0	0	0	0	0	0	0	0	0	0	0
wt_saf_neg_peak_14802	chr10	43153381	43153873	-	493	14	9	6	16	1	0	0	0	Yes	0.376857	0.266545	0.1803	0.217146	0.0303549	0	0	0	N/A	No	0.274567	0.0151774	Yes	5.25444	-3.89914	1.73216	-2.25103	0.0243834	0.154908	protein_coding	intronic	0	0	0	0	0	0	0	0	0	0	0	0	0	0
wt_saf_neg_peak_14805	chr10	43173981	43174160	-	180	3	13	9	14	1	0	0	0	Yes	0.080755	0.38501	0.270451	0.190003	0.0303549	0	0	0	N/A	No	0.245405	0.0151774	Yes	4.68687	-3.72046	1.79321	-2.07475	0.03801	0.208054	protein_coding	UTR5	0	0	0	0	0	0	0	0	0	0	1	0	0	0
wt_saf_neg_peak_14812	chr10	43451365	43451663	-	299	14	16	5	0	0	0	0	0	Yes	0.376857	0.473858	0.15025	0	0	0	0	0	N/A	Yes	0.333655	0	Yes	6.07831	-5.60868	1.72881	-3.24425	0.00117761	0.0182101	other	intronic	0	0	1	0	0	0	0	0	0	0	1	1	0	0
wt_saf_neg_peak_14815	chr10	43473929	43474426	-	498	19	7	13	5	0	3	0	1	Yes	0.511448	0.207313	0.390651	0.0678582	0	0.0931411	0	0.0661091	N/A	Yes	0.369804	0.0465706	Yes	7.52644	-2.72949	1.19981	-2.27493	0.0229099	0.148458	other	intronic	0	0	0	0	0	0	0	0	0	0	0	1	0	0
wt_saf_neg_peak_14869	chr10	44264327	44265326	-	1000	16	23	21	23	2	4	0	1	Yes	0.430693	0.681171	0.631051	0.312148	0.0607097	0.124188	0	0.0661091	N/A	Yes	0.580972	0.0924489	Yes	12.007	-2.37728	0.874526	-2.71837	0.00656043	0.0646341	other	intronic	0	0	0	3	0	0	0	0	0	0	0	0	0	0
wt_saf_neg_peak_14936	chr10	45387956	45388118	-	163	2	13	8	5	0	1	0	1	Yes	0.0538367	0.38501	0.240401	0.0678582	0	0.031047	0	0.0661091	N/A	Yes	0.226416	0.0155235	Yes	4.34761	-3.58977	1.83122	-1.96032	0.0499586	0.247644	protein_coding	intronic	0	0	0	0	0	0	0	0	0	0	0	0	0	0
wt_saf_neg_peak_14946	chr10	45401173	45401468	-	296	10	18	11	3	2	2	0	3	Yes	0.269183	0.53309	0.330551	0.0407149	0.0607097	0.0620941	0	0.198327	N/A	Yes	0.377608	0.0614019	Yes	7.79146	-2.34238	1.07222	-2.18461	0.0289177	0.173796	protein_coding	intronic	0	2	0	0	0	0	0	0	0	0	0	0	0	0
wt_saf_neg_peak_15037	chr10	48705691	48705770	-	80	6	3	10	4	0	0	0	2	Yes	0.16151	0.0888483	0.300501	0.0542865	0	0	0	0.132218	N/A	Yes	0.18362	0	Yes	3.39705	-4.76265	1.91395	-2.48838	0.0128326	0.101751	other	intronic	0	1	0	0	0	0	0	0	0	0	0	0	0	0
wt_saf_neg_peak_15041	chr10	49495891	49496027	-	137	6	6	1	0	0	0	0	0	Yes	0.16151	0.177697	0.0300501	0	0	0	0	0	N/A	Yes	0.123086	0	Yes	2.24057	-4.17059	2.12625	-1.96148	0.0498234	NA	protein_coding	UTR3	0	1	0	0	0	0	0	0	0	0	0	0	0	0
wt_saf_neg_peak_15048	chr10	49751428	49751925	-	498	15	2	7	0	0	0	0	2	Yes	0.403775	0.0592322	0.21035	0	0	0	0	0.132218	N/A	Yes	0.224453	0	Yes	4.15877	-5.06118	1.8756	-2.69844	0.00696652	0.0673759	protein_coding	intronic	0	0	0	0	0	0	0	0	0	0	1	0	0	0
wt_saf_neg_peak_15070	chr10	52333687	52333942	-	256	21	5	7	0	0	0	0	4	Yes	0.565285	0.148081	0.21035	0	0	0	0	0.264436	N/A	Yes	0.307905	0	Yes	5.68508	-5.5135	1.76541	-3.12307	0.00178977	0.0250238	other	intronic	0	1	0	0	0	0	0	0	0	0	0	0	0	0
wt_saf_neg_peak_15100	chr10	52801474	52801805	-	332	37	38	20	5	8	4	0	0	Yes	0.995978	1.12541	0.601001	0.0678582	0.242839	0.124188	0	0	N/A	Yes	0.907464	0.183513	Yes	19.2677	-2.03522	0.67717	-3.00547	0.00265168	0.0336918	other	intronic	0	0	1	1	0	0	0	0	0	0	1	0	0	0
wt_saf_neg_peak_15111	chr10	53289595	53289708	-	114	14	8	6	2	0	0	0	4	Yes	0.376857	0.236929	0.1803	0.0271433	0	0	0	0.264436	N/A	Yes	0.264695	0	Yes	4.85955	-5.28604	1.77485	-2.97831	0.00289847	0.0360314	protein_coding	intronic	0	1	0	0	0	0	0	0	0	0	0	0	0	0
wt_saf_neg_peak_15235	chr10	54054501	54054817	-	317	8	7	5	1	0	0	0	0	Yes	0.215347	0.207313	0.15025	0.0135716	0	0	0	0	N/A	Yes	0.19097	0	Yes	3.49763	-4.80992	1.87351	-2.56733	0.0102485	0.0877486	protein_coding	intronic	0	1	0	0	0	0	0	0	0	0	0	0	0	0
wt_saf_neg_peak_15287	chr10	56208784	56209903	-	1120	17	30	8	7	5	3	0	1	Yes	0.457612	0.888483	0.240401	0.0950014	0.151774	0.0931411	0	0.0661091	N/A	Yes	0.528832	0.122458	Yes	11.3956	-1.83037	0.880883	-2.07788	0.0377201	0.207088	protein_coding	intronic	0	1	0	0	0	0	0	0	0	0	0	0	0	0
wt_saf_neg_peak_15288	chr10	56210274	56210473	-	200	7	7	6	0	0	0	0	0	Yes	0.188428	0.207313	0.1803	0	0	0	0	0	N/A	Yes	0.192014	0	Yes	3.51819	-4.81696	1.86854	-2.57792	0.00993961	0.0859971	protein_coding	intronic	0	0	0	0	0	0	0	0	0	0	0	0	0	0
wt_saf_neg_peak_15304	chr10	57333087	57333620	-	534	7	11	6	1	1	0	0	1	Yes	0.188428	0.325777	0.1803	0.0135716	0.0303549	0	0	0.0661091	N/A	Yes	0.231502	0.0151774	Yes	4.44026	-3.64201	1.77507	-2.05176	0.0401929	0.215747	other	intronic	0	1	0	0	0	0	0	0	0	0	0	0	0	0
wt_saf_neg_peak_15305	chr10	57485337	57486137	-	801	23	8	16	7	0	3	0	4	Yes	0.619122	0.236929	0.480801	0.0950014	0	0.0931411	0	0.264436	N/A	Yes	0.445617	0.0465706	Yes	8.92947	-3.00055	1.1575	-2.59227	0.00953456	0.0836092	lncRNA	intronic	0	0	0	0	0	0	0	0	0	0	1	1	0	0
wt_saf_neg_peak_15307	chr10	57507754	57508041	-	288	14	10	9	11	1	2	0	4	Yes	0.376857	0.296161	0.270451	0.149288	0.0303549	0.0620941	0	0.264436	N/A	No	0.314489	0.0462245	Yes	6.45839	-2.49976	1.1948	-2.0922	0.0364204	0.202467	other	intronic	0	0	0	0	0	0	0	0	0	0	0	0	0	0
wt_saf_neg_peak_15393	chr10	59506169	59506243	-	75	4	8	9	0	0	0	0	1	Yes	0.107673	0.236929	0.270451	0	0	0	0	0.0661091	N/A	Yes	0.205018	0	Yes	3.75558	-4.90739	1.86308	-2.63402	0.00843797	0.0769829	protein_coding	intronic	0	0	0	0	0	0	0	0	0	0	0	1	0	0
wt_saf_neg_peak_15453	chr10	59669786	59670046	-	261	1	8	5	0	0	0	0	0	Yes	0.0269183	0.236929	0.15025	0	0	0	0	0	N/A	Yes	0.138033	0	Yes	2.50772	-4.32479	2.08639	-2.07286	0.0381855	NA	other	intronic	0	0	0	0	0	0	0	0	0	0	0	0	0	0
wt_saf_neg_peak_15484	chr10	60066285	60066519	-	235	14	12	4	2	0	1	0	0	Yes	0.376857	0.355393	0.1202	0.0271433	0	0.031047	0	0	N/A	Yes	0.28415	0.0155235	Yes	5.42182	-3.93373	1.73828	-2.263	0.0236354	0.151601	other	intronic	0	0	1	0	0	0	0	0	0	0	0	1	0	0
wt_saf_neg_peak_15495	chr10	60209360	60209785	-	426	10	4	9	11	0	0	0	3	Yes	0.269183	0.118464	0.270451	0.149288	0	0	0	0.198327	N/A	No	0.219366	0	Yes	4.05178	-5.02023	1.83723	-2.7325	0.00628549	0.0626603	protein_coding	intronic	0	0	0	0	0	0	0	0	0	0	0	1	0	0
wt_saf_neg_peak_15572	chr10	61092192	61092619	-	428	25	17	18	6	7	3	0	2	Yes	0.672958	0.503474	0.540901	0.0814298	0.212484	0.0931411	0	0.132218	N/A	Yes	0.572444	0.152813	Yes	12.7523	-1.64256	0.778101	-2.11098	0.0347738	0.196439	other	intronic	0	0	0	0	0	0	0	0	0	0	0	0	0	0
wt_saf_neg_peak_15839	chr10	62549349	62549659	-	311	5	2	13	0	0	0	0	0	Yes	0.134592	0.0592322	0.390651	0	0	0	0	0	N/A	Yes	0.194825	0	Yes	3.61602	-4.85079	1.93014	-2.51319	0.0119646	0.0974025	protein_coding	intronic	0	0	0	1	0	0	0	0	0	0	0	0	0	0
wt_saf_neg_peak_15840	chr10	62551305	62551686	-	382	9	2	5	0	0	0	0	4	Yes	0.242265	0.0592322	0.15025	0	0	0	0	0.264436	N/A	Yes	0.150583	0	Yes	2.78551	-4.48224	2.00357	-2.23713	0.0252778	NA	protein_coding	intronic	0	2	0	0	0	0	0	0	0	0	0	1	0	0
wt_saf_neg_peak_16028	chr10	64912391	64912593	-	203	8	6	4	3	0	0	0	4	Yes	0.215347	0.177697	0.1202	0.0407149	0	0	0	0.264436	N/A	Yes	0.171081	0	Yes	3.13483	-4.65289	1.92078	-2.42239	0.0154186	0.114712	other	intronic	0	0	0	0	0	0	0	0	0	0	0	0	0	0
wt_saf_neg_peak_16040	chr10	66777885	66778790	-	906	16	16	8	4	0	0	0	1	Yes	0.430693	0.473858	0.240401	0.0542865	0	0	0	0.0661091	N/A	Yes	0.381651	0	Yes	6.97257	-5.80595	1.68225	-3.45131	0.000557882	0.0101714	other	intronic	0	0	0	2	0	0	0	0	0	0	0	0	0	0
wt_saf_neg_peak_16045	chr10	66833932	66834149	-	218	8	10	3	1	0	0	0	0	Yes	0.215347	0.296161	0.0901502	0.0135716	0	0	0	0	N/A	Yes	0.200553	0	Yes	3.65067	-4.87305	1.88088	-2.59083	0.00957444	0.0838484	other	intronic	0	0	1	0	0	0	0	0	1	0	0	0	0	0
wt_saf_neg_peak_16063	chr10	66918509	66918846	-	338	7	7	4	0	0	0	0	0	Yes	0.188428	0.207313	0.1202	0	0	0	0	0	N/A	Yes	0.17198	0	Yes	3.14404	-4.65646	1.91847	-2.42718	0.0152169	0.113789	lncRNA	exonic	0	0	0	1	0	0	0	0	0	0	0	0	0	0
wt_saf_neg_peak_16074	chr10	67023317	67023624	-	308	25	22	20	10	10	2	0	4	Yes	0.672958	0.651555	0.601001	0.135716	0.303549	0.0620941	0	0.264436	N/A	Yes	0.641838	0.182821	Yes	14.4291	-1.54868	0.749535	-2.06618	0.0388113	0.210895	protein_coding	intronic	0	0	0	0	0	0	0	0	0	0	0	1	0	0
wt_saf_neg_peak_16101	chr10	67087837	67088187	-	351	27	21	15	14	1	8	0	0	Yes	0.726795	0.621938	0.450751	0.190003	0.0303549	0.248376	0	0	N/A	Yes	0.599828	0.139366	Yes	13.0796	-1.83127	0.827348	-2.21343	0.0268682	0.165422	protein_coding	intronic	0	0	0	1	0	0	0	0	0	0	0	0	0	0
wt_saf_neg_peak_16140	chr10	67890087	67890310	-	224	12	12	11	12	3	1	0	1	Yes	0.32302	0.355393	0.330551	0.16286	0.0910646	0.031047	0	0.0661091	N/A	Yes	0.336321	0.0610558	Yes	7.05578	-2.19279	1.09588	-2.00094	0.0453986	0.232983	protein_coding	intronic	0	0	0	0	0	0	0	0	0	0	0	1	0	0
wt_saf_neg_peak_16170	chr10	68154513	68154649	-	137	8	2	5	2	0	0	0	2	Yes	0.215347	0.0592322	0.15025	0.0271433	0	0	0	0.132218	N/A	Yes	0.14161	0	Yes	2.61899	-4.39269	2.02652	-2.1676	0.0301891	NA	protein_coding	intronic	0	0	0	0	0	0	0	0	0	0	0	0	0	0
wt_saf_neg_peak_16171	chr10	68155110	68155280	-	171	6	7	2	4	0	0	0	3	Yes	0.16151	0.207313	0.0601001	0.0542865	0	0	0	0.198327	N/A	Yes	0.142974	0	Yes	2.60337	-4.38568	2.02374	-2.16711	0.0302263	NA	protein_coding	intronic	0	0	0	0	0	0	0	0	0	0	0	1	0	0
wt_saf_neg_peak_16174	chr10	68160760	68161523	-	764	11	18	13	4	0	0	0	2	Yes	0.296102	0.53309	0.390651	0.0542865	0	0	0	0.132218	N/A	Yes	0.406614	0	Yes	7.4268	-5.89371	1.66605	-3.53754	0.000403877	0.00784605	protein_coding	intronic	1	0	0	0	0	0	0	0	0	0	0	0	0	0
wt_saf_neg_peak_16181	chr10	68175090	68175497	-	408	7	15	9	5	0	1	0	4	Yes	0.188428	0.444242	0.270451	0.0678582	0	0.031047	0	0.264436	N/A	Yes	0.30104	0.0155235	Yes	5.71874	-4.00906	1.71289	-2.34052	0.0192569	0.132293	protein_coding	intronic	0	0	0	0	0	0	0	0	0	0	0	1	0	0
wt_saf_neg_peak_16183	chr10	68177032	68177106	-	75	6	2	5	5	0	0	0	3	Yes	0.16151	0.0592322	0.15025	0.0678582	0	0	0	0.198327	N/A	Yes	0.123664	0	Yes	2.28595	-4.19488	2.08388	-2.01301	0.0441134	NA	protein_coding	intronic	0	0	0	0	0	0	0	0	0	0	0	0	0	0
wt_saf_neg_peak_16185	chr10	68178346	68178782	-	437	16	8	8	15	0	0	0	2	Yes	0.430693	0.236929	0.240401	0.203575	0	0	0	0.132218	N/A	No	0.302674	0	Yes	5.56674	-5.48147	1.73685	-3.15599	0.00159952	0.0230224	protein_coding	intronic	0	0	0	0	0	0	0	0	0	0	0	1	0	0
wt_saf_neg_peak_16190	chr10	68188299	68188494	-	196	5	4	6	1	0	0	0	3	Yes	0.134592	0.118464	0.1803	0.0135716	0	0	0	0.198327	N/A	Yes	0.144452	0	Yes	2.65796	-4.41065	1.99055	-2.2158	0.0267055	NA	protein_coding	intronic	0	0	0	0	0	0	0	0	0	0	0	0	0	0
wt_saf_neg_peak_16194	chr10	68201339	68202013	-	675	13	13	14	2	3	1	0	1	Yes	0.349938	0.38501	0.420701	0.0271433	0.0910646	0.031047	0	0.0661091	N/A	Yes	0.385216	0.0610558	Yes	7.95925	-2.38864	1.06285	-2.2474	0.0246144	0.155896	protein_coding	intronic	0	0	0	0	0	0	0	0	0	0	0	0	0	0
wt_saf_neg_peak_16202	chr10	68222258	68222460	-	203	8	3	6	12	0	0	0	0	Yes	0.215347	0.0888483	0.1803	0.16286	0	0	0	0	N/A	No	0.161498	0	Yes	2.98179	-4.57887	1.95294	-2.34461	0.0190472	0.1314	protein_coding	intronic	0	0	0	0	0	0	0	0	0	0	0	0	0	0
wt_saf_neg_peak_16249	chr10	69925324	69925520	-	197	15	9	5	3	0	1	0	0	Yes	0.403775	0.266545	0.15025	0.0407149	0	0.031047	0	0	N/A	Yes	0.273523	0.0155235	Yes	5.24823	-3.88472	1.73918	-2.23366	0.0255057	0.159709	other	intronic	0	0	0	0	0	0	0	0	0	0	1	0	0	0
wt_saf_neg_peak_16264	chr10	70359525	70359750	-	226	8	7	4	0	0	0	0	1	Yes	0.215347	0.207313	0.1202	0	0	0	0	0.0661091	N/A	Yes	0.180953	0	Yes	3.31056	-4.73148	1.89961	-2.49077	0.0127467	0.101315	other	intronic	1	0	0	1	0	0	0	0	0	0	0	0	0	0
wt_saf_neg_peak_16285	chr10	70974896	70975390	-	495	11	10	11	2	0	1	0	2	Yes	0.296102	0.296161	0.330551	0.0271433	0	0.031047	0	0.132218	N/A	Yes	0.307605	0.0155235	Yes	5.88032	-4.05183	1.69262	-2.39382	0.0166739	0.120857	protein_coding	intronic	0	0	0	0	0	0	0	0	0	0	0	0	0	0
wt_saf_neg_peak_16298	chr10	71137742	71138146	-	405	8	3	7	0	0	0	0	0	Yes	0.215347	0.0888483	0.21035	0	0	0	0	0	N/A	Yes	0.171515	0	Yes	3.16886	-4.66579	1.92981	-2.41774	0.0156171	0.115709	protein_coding	intronic	0	0	0	0	0	0	0	0	0	0	1	1	0	0
wt_saf_neg_peak_16325	chr10	71266890	71267530	-	641	23	20	23	29	6	7	0	3	Yes	0.619122	0.592322	0.691151	0.393577	0.182129	0.217329	0	0.198327	N/A	No	0.634198	0.199729	Yes	14.5967	-1.39807	0.701424	-1.99319	0.0462406	0.235735	protein_coding	intronic	0	0	0	0	0	0	0	0	0	0	1	1	0	0
wt_saf_neg_peak_16597	chr10	76600499	76601035	-	537	13	7	9	6	0	1	0	0	Yes	0.349938	0.207313	0.270451	0.0814298	0	0.031047	0	0	N/A	Yes	0.275901	0.0155235	Yes	5.31203	-3.90016	1.72347	-2.26296	0.0236381	0.15161	protein_coding	intronic	1	0	1	0	0	0	0	0	0	0	1	0	0	0
wt_saf_neg_peak_16604	chr10	76753910	76754267	-	358	10	8	11	4	0	2	0	4	Yes	0.269183	0.236929	0.330551	0.0542865	0	0.0620941	0	0.264436	N/A	Yes	0.278888	0.031047	Yes	5.59584	-2.90213	1.38886	-2.08958	0.0366558	0.20331	other	intronic	0	0	0	0	0	0	0	0	0	0	0	0	0	0
wt_saf_neg_peak_16641	chr10	76832824	76832900	-	77	6	11	1	0	0	0	0	0	Yes	0.16151	0.325777	0.0300501	0	0	0	0	0	N/A	Yes	0.172446	0	Yes	3.11921	-4.64651	1.99824	-2.32531	0.0200555	0.135695	protein_coding	intronic	0	0	0	0	0	0	0	0	0	0	0	0	0	0
wt_saf_neg_peak_16646	chr10	76848714	76848874	-	161	20	12	16	12	4	3	0	1	Yes	0.538367	0.355393	0.480801	0.16286	0.121419	0.0931411	0	0.0661091	N/A	Yes	0.458187	0.10728	Yes	10.0095	-1.83149	0.885357	-2.06865	0.038579	0.210086	protein_coding	intronic	0	1	0	0	0	0	0	0	0	0	0	0	0	0
wt_saf_neg_peak_16942	chr10	78311789	78311986	-	198	6	7	6	3	0	0	0	0	Yes	0.16151	0.207313	0.1803	0.0407149	0	0	0	0	N/A	Yes	0.183041	0	Yes	3.35167	-4.74635	1.88782	-2.51419	0.0119305	0.0972181	protein_coding	intronic	0	0	0	0	0	0	0	0	0	0	0	0	0	0
wt_saf_neg_peak_16990	chr10	78587599	78587875	-	277	13	12	5	8	1	0	0	2	Yes	0.349938	0.355393	0.15025	0.108573	0.0303549	0	0	0.132218	N/A	Yes	0.285194	0.0151774	Yes	5.42804	-3.948	1.72913	-2.28324	0.0224165	0.146218	protein_coding	intronic	0	0	0	0	0	0	0	0	0	0	0	2	0	0
wt_saf_neg_peak_16997	chr10	78716311	78716656	-	346	6	6	2	1	0	0	0	3	Yes	0.16151	0.177697	0.0601001	0.0135716	0	0	0	0.198327	N/A	Yes	0.133102	0	Yes	2.42764	-4.28507	2.0532	-2.08703	0.0368858	NA	protein_coding	intronic	0	0	0	0	0	0	0	0	0	0	0	0	0	0
wt_saf_neg_peak_17130	chr10	80051596	80051930	-	335	8	8	1	4	0	0	0	0	Yes	0.215347	0.236929	0.0300501	0.0542865	0	0	0	0	N/A	Yes	0.160775	0	Yes	2.92506	-4.55533	2.01324	-2.26269	0.0236549	0.15167	other	intronic	0	0	0	0	0	0	0	0	0	0	0	0	0	0
wt_saf_neg_peak_17176	chr10	80266278	80266739	-	462	17	14	5	17	2	2	0	0	Yes	0.457612	0.414626	0.15025	0.230718	0.0607097	0.0620941	0	0	N/A	No	0.340829	0.0614019	Yes	7.13173	-2.20243	1.11799	-1.96999	0.0488398	0.244175	other	intronic	0	0	0	0	0	0	0	0	0	0	1	1	0	0
wt_saf_neg_peak_17192	chr10	80338772	80338982	-	211	15	9	6	1	0	2	0	2	Yes	0.403775	0.266545	0.1803	0.0135716	0	0.0620941	0	0.132218	N/A	Yes	0.28354	0.031047	Yes	5.6688	-2.92715	1.39808	-2.09369	0.0362878	0.201967	other	intronic	0	0	0	0	0	0	0	0	0	0	1	1	0	0
wt_saf_neg_peak_17271	chr10	80694627	80694844	-	218	18	16	15	14	5	3	0	3	Yes	0.48453	0.473858	0.450751	0.190003	0.151774	0.0931411	0	0.198327	N/A	Yes	0.469713	0.122458	Yes	10.4114	-1.67211	0.848173	-1.97143	0.0486751	0.243659	protein_coding	intronic	0	0	0	0	0	0	0	0	0	0	0	1	0	0
wt_saf_neg_peak_17310	chr10	80842871	80843320	-	450	18	6	9	5	0	2	0	0	Yes	0.48453	0.177697	0.270451	0.0678582	0	0.0620941	0	0	N/A	Yes	0.310892	0.031047	Yes	6.2024	-3.06767	1.38301	-2.21811	0.0265474	0.164054	protein_coding	intronic	0	0	0	0	0	0	0	0	0	0	0	0	0	0
wt_saf_neg_peak_17335	chr10	80955039	80955202	-	164	10	9	4	3	0	0	0	0	Yes	0.269183	0.266545	0.1202	0.0407149	0	0	0	0	N/A	Yes	0.218643	0	Yes	3.99506	-5.00331	1.83845	-2.72148	0.006499	0.0642091	protein_coding	intronic	0	0	0	0	0	0	0	0	0	0	1	0	0	0
wt_saf_neg_peak_17349	chr10	81004583	81004922	-	340	13	9	11	0	0	0	0	1	Yes	0.349938	0.266545	0.330551	0	0	0	0	0.0661091	N/A	Yes	0.315678	0	Yes	5.80413	-5.5392	1.71669	-3.22668	0.00125236	0.0190873	protein_coding	intronic	0	0	0	0	0	0	0	0	0	0	0	0	0	0
wt_saf_neg_peak_17429	chr10	81358002	81358161	-	160	6	5	5	0	0	0	0	0	Yes	0.16151	0.148081	0.15025	0	0	0	0	0	N/A	Yes	0.15328	0	Yes	2.81313	-4.49441	1.96029	-2.29272	0.0218639	NA	other	intronic	0	0	0	0	0	0	0	0	0	0	0	0	0	0
wt_saf_neg_peak_17508	chr10	82060721	82060922	-	202	5	5	5	1	0	0	0	3	Yes	0.134592	0.148081	0.15025	0.0135716	0	0	0	0.198327	N/A	Yes	0.144308	0	Yes	2.64661	-4.40554	1.988	-2.21607	0.0266867	NA	other	intronic	0	0	0	0	0	0	0	0	0	0	0	0	0	0
wt_saf_neg_peak_17542	chr10	82758153	82758229	-	77	16	20	9	7	1	3	0	0	Yes	0.430693	0.592322	0.270451	0.0950014	0.0303549	0.0931411	0	0	N/A	Yes	0.431155	0.061748	Yes	8.78222	-2.52763	1.05185	-2.40302	0.0162601	0.118856	protein_coding	intronic	0	0	0	0	0	0	0	0	0	0	0	0	0	0
wt_saf_neg_peak_17546	chr10	82771848	82772350	-	503	9	6	5	0	0	0	0	2	Yes	0.242265	0.177697	0.15025	0	0	0	0	0.132218	N/A	Yes	0.190071	0	Yes	3.48842	-4.8067	1.8771	-2.5607	0.0104462	0.0888488	other	intronic	0	0	0	0	0	0	0	0	0	0	1	0	0	0
wt_saf_neg_peak_17607	chr10	83566905	83567041	-	137	9	2	5	1	0	0	0	3	Yes	0.242265	0.0592322	0.15025	0.0135716	0	0	0	0.198327	N/A	Yes	0.150583	0	Yes	2.78551	-4.48224	2.00357	-2.23713	0.0252778	NA	other	intronic	0	1	0	0	0	0	0	0	0	0	0	0	0	0
wt_saf_neg_peak_17702	chr10	85109122	85109565	-	444	4	7	13	11	1	0	0	3	Yes	0.107673	0.207313	0.390651	0.149288	0.0303549	0	0	0.198327	N/A	No	0.235212	0.0151774	Yes	4.54731	-3.67228	1.79318	-2.04792	0.0405681	0.216975	other	intronic	0	1	0	0	0	0	0	0	0	0	0	1	0	0
wt_saf_neg_peak_17706	chr10	85124272	85124381	-	110	8	15	12	12	0	1	0	4	Yes	0.215347	0.444242	0.360601	0.16286	0	0.031047	0	0.264436	N/A	Yes	0.340063	0.0155235	Yes	6.44648	-4.1885	1.6817	-2.49063	0.0127517	0.101345	protein_coding	intronic	0	0	1	0	0	0	0	0	0	0	0	0	0	0
wt_saf_neg_peak_17709	chr10	85130570	85130644	-	75	2	7	9	4	0	0	0	0	Yes	0.0538367	0.207313	0.270451	0.0542865	0	0	0	0	N/A	Yes	0.1772	0	Yes	3.24681	-4.69574	1.94751	-2.41114	0.0159026	0.117065	other	intronic	0	0	0	0	0	0	0	0	0	0	0	0	0	0
wt_saf_neg_peak_17714	chr10	85141088	85141162	-	75	8	6	3	0	0	0	0	0	Yes	0.215347	0.177697	0.0901502	0	0	0	0	0	N/A	Yes	0.161065	0	Yes	2.94775	-4.56512	1.95507	-2.33501	0.0195427	0.133485	protein_coding	intronic	0	0	0	0	0	0	0	0	0	0	0	0	0	0
wt_saf_neg_peak_17740	chr10	85653237	85653447	-	211	12	6	5	0	0	1	0	1	Yes	0.32302	0.177697	0.15025	0	0	0.031047	0	0.0661091	N/A	Yes	0.216989	0.0155235	Yes	4.22148	-3.55273	1.79529	-1.97892	0.0478251	0.240935	other	intronic	0	0	0	0	0	0	0	0	0	0	1	0	0	0
wt_saf_neg_peak_17790	chr10	86188007	86188389	-	383	14	7	6	5	0	0	0	0	Yes	0.376857	0.207313	0.1803	0.0678582	0	0	0	0	N/A	Yes	0.254823	0	Yes	4.68383	-5.23297	1.78775	-2.92712	0.00342111	0.04076	protein_coding	intronic	0	0	0	0	0	0	0	0	0	0	0	0	0	0
wt_saf_neg_peak_17796	chr10	86208849	86209195	-	347	8	5	1	0	0	0	0	1	Yes	0.215347	0.148081	0.0300501	0	0	0	0	0.0661091	N/A	Yes	0.131159	0	Yes	2.39788	-4.26971	2.0988	-2.03436	0.0419155	NA	protein_coding	intronic	0	0	0	0	0	0	0	0	0	0	0	0	0	0
wt_saf_neg_peak_17803	chr10	86283305	86283832	-	528	19	7	1	0	0	0	0	0	Yes	0.511448	0.207313	0.0300501	0	0	0	0	0	N/A	Yes	0.249604	0	Yes	4.58105	-5.20429	1.89067	-2.75262	0.00591205	0.0601376	protein_coding	intronic	1	0	0	0	0	0	0	0	0	0	0	1	0	0
wt_saf_neg_peak_17810	chr10	86305274	86305409	-	136	2	5	8	0	0	0	0	0	Yes	0.0538367	0.148081	0.240401	0	0	0	0	0	N/A	Yes	0.147439	0	Yes	2.70828	-4.4337	2.01866	-2.19636	0.028066	NA	protein_coding	intronic	0	0	0	0	0	0	0	0	0	0	0	0	0	0
wt_saf_neg_peak_17816	chr10	86323160	86323515	-	356	10	15	6	5	0	2	0	3	Yes	0.269183	0.444242	0.1803	0.0678582	0	0.0620941	0	0.198327	N/A	Yes	0.297908	0.031047	Yes	5.89058	-2.98556	1.38832	-2.15048	0.0315175	0.183976	protein_coding	intronic	0	0	0	0	0	0	0	0	0	0	0	0	0	0
wt_saf_neg_peak_17823	chr10	86335159	86335497	-	339	20	14	10	10	2	0	0	4	Yes	0.538367	0.414626	0.300501	0.135716	0.0607097	0	0	0.264436	N/A	Yes	0.417831	0.0303549	Yes	8.09967	-3.51147	1.29877	-2.70369	0.00685736	0.066656	protein_coding	intronic	0	0	0	0	0	0	0	0	0	0	0	1	0	0
wt_saf_neg_peak_17824	chr10	86335923	86336044	-	122	5	7	2	3	0	0	0	0	Yes	0.134592	0.207313	0.0601001	0.0407149	0	0	0	0	N/A	Yes	0.134002	0	Yes	2.43685	-4.28968	2.05465	-2.08779	0.0368168	NA	protein_coding	intronic	0	0	0	0	0	0	0	0	0	0	0	0	0	0
wt_saf_neg_peak_17845	chr10	86414860	86415052	-	193	10	1	5	0	0	0	0	0	Yes	0.269183	0.0296161	0.15025	0	0	0	0	0	N/A	Yes	0.149683	0	Yes	2.7763	-4.47796	2.04483	-2.18989	0.0285319	NA	protein_coding	intronic	0	0	0	1	0	0	0	0	0	0	0	0	0	0
wt_saf_neg_peak_17943	chr10	88663572	88663881	-	310	9	10	8	4	2	0	0	2	Yes	0.242265	0.296161	0.240401	0.0542865	0.0607097	0	0	0.132218	N/A	Yes	0.259609	0.0303549	Yes	5.19088	-2.82354	1.41511	-1.99528	0.0460119	0.235012	other	intronic	0	0	0	2	0	0	0	0	0	0	0	0	0	0
wt_saf_neg_peak_18198	chr10	93158362	93158802	-	441	7	5	9	1	0	0	0	2	Yes	0.188428	0.148081	0.270451	0.0135716	0	0	0	0.132218	N/A	Yes	0.20232	0	Yes	3.72795	-4.89829	1.85643	-2.63855	0.00832608	0.0762689	other	intronic	0	0	2	0	0	0	0	0	0	0	0	1	0	0
wt_saf_neg_peak_18218	chr10	93297365	93297507	-	143	7	5	4	2	0	0	0	1	Yes	0.188428	0.148081	0.1202	0.0271433	0	0	0	0.0661091	N/A	Yes	0.152236	0	Yes	2.79258	-4.48558	1.9677	-2.2796	0.0226311	NA	protein_coding	intronic	0	0	0	0	0	0	0	0	0	0	0	0	0	0
wt_saf_neg_peak_18224	chr10	93360176	93360307	-	132	12	11	23	3	2	2	0	0	Yes	0.32302	0.325777	0.691151	0.0407149	0.0607097	0.0620941	0	0	N/A	Yes	0.44665	0.0614019	Yes	9.13928	-2.59678	1.04621	-2.48207	0.0130621	0.102966	other	intronic	0	0	0	1	0	0	0	0	0	0	0	1	0	0
wt_saf_neg_peak_18240	chr10	93855588	93855935	-	348	16	12	12	0	3	2	0	3	Yes	0.430693	0.355393	0.360601	0	0.0910646	0.0620941	0	0.198327	N/A	Yes	0.382229	0.0765793	Yes	8.14244	-2.05338	0.998815	-2.05581	0.0398007	0.214439	other	intronic	0	0	0	0	0	0	0	0	0	0	0	1	0	0
wt_saf_neg_peak_18303	chr10	94833363	94833673	-	311	7	6	2	19	0	0	0	0	Yes	0.188428	0.177697	0.0601001	0.257861	0	0	0	0	N/A	No	0.142075	0	Yes	2.59416	-4.38135	2.02458	-2.16408	0.0304584	NA	protein_coding	intronic	0	0	0	0	0	0	0	0	0	0	0	0	0	0
wt_saf_neg_peak_18309	chr10	94882242	94882688	-	447	7	12	4	9	0	1	2	2	Yes	0.188428	0.355393	0.1202	0.122145	0	0.031047	0.139369	0.132218	N/A	No	0.221341	0.0155235	Yes	4.25618	-3.56308	1.80009	-1.97938	0.0477728	0.24076	protein_coding	exonic	0	0	0	0	0	0	0	0	0	0	0	0	0	0
wt_saf_neg_peak_18337	chr10	95225150	95225258	-	109	26	24	9	10	6	4	0	1	Yes	0.699877	0.710787	0.270451	0.135716	0.182129	0.124188	0	0.0661091	N/A	Yes	0.560371	0.153159	Yes	12.4796	-1.60106	0.808309	-1.98075	0.0476196	0.24026	protein_coding	intronic	0	0	0	0	0	0	0	0	0	0	0	0	0	0
wt_saf_neg_peak_18474	chr10	97270068	97270327	-	260	11	5	1	0	0	0	0	2	Yes	0.296102	0.148081	0.0300501	0	0	0	0	0.132218	N/A	Yes	0.158077	0	Yes	2.89744	-4.54343	2.02815	-2.24018	0.0250792	NA	other	intronic	0	1	0	0	0	0	0	0	0	0	0	0	0	0
wt_saf_neg_peak_18476	chr10	97307860	97308630	-	771	19	24	21	5	1	1	0	3	Yes	0.511448	0.710787	0.631051	0.0678582	0.0303549	0.031047	0	0.198327	N/A	Yes	0.617762	0.0307009	Yes	11.7626	-4.0583	1.20717	-3.36183	0.000774281	0.0131729	other	intronic	0	1	0	0	0	0	0	0	0	0	0	0	0	0
wt_saf_neg_peak_18500	chr10	99456012	99456736	-	725	7	17	9	3	0	2	0	3	Yes	0.188428	0.503474	0.270451	0.0407149	0	0.0620941	0	0.198327	N/A	Yes	0.320784	0.031047	Yes	6.3037	-3.08929	1.37393	-2.2485	0.024544	0.15562	lncRNA	intronic	0	0	0	0	0	0	0	0	0	0	0	0	0	0
wt_saf_neg_peak_18592	chr10	105783239	105784163	-	925	33	38	26	7	4	16	0	1	Yes	0.888305	1.12541	0.781302	0.0950014	0.121419	0.496753	0	0.0661091	N/A	Yes	0.931673	0.309086	Yes	21.6494	-1.31167	0.627931	-2.08888	0.0367185	0.203529	protein_coding	intronic	0	1	0	0	0	0	0	0	0	0	0	0	0	0
wt_saf_neg_peak_18608	chr10	105827221	105827295	-	75	9	11	4	0	0	0	0	0	Yes	0.242265	0.325777	0.1202	0	0	0	0	0	N/A	Yes	0.229414	0	Yes	4.17999	-5.06798	1.82684	-2.77417	0.00553424	0.0573816	protein_coding	intronic	0	0	0	0	0	0	0	0	0	0	0	0	0	0
wt_saf_neg_peak_18613	chr10	105962654	105962738	-	85	9	9	8	6	0	0	0	1	Yes	0.242265	0.266545	0.240401	0.0814298	0	0	0	0.0661091	N/A	Yes	0.249737	0	Yes	4.57683	-5.19631	1.77946	-2.92016	0.00349851	0.0414593	other	intronic	0	0	0	0	0	0	0	0	0	0	1	0	0	0
wt_saf_neg_peak_18626	chr10	107669929	107670029	-	101	11	11	11	0	0	0	0	0	Yes	0.296102	0.325777	0.330551	0	0	0	0	0	N/A	Yes	0.317477	0	Yes	5.82255	-5.54305	1.71363	-3.23469	0.00121777	0.0186864	protein_coding	intronic	0	0	0	0	0	0	0	0	0	0	1	0	0	0
wt_saf_neg_peak_18649	chr10	108298586	108298891	-	306	21	19	3	2	3	0	0	2	Yes	0.565285	0.562706	0.0901502	0.0271433	0.0910646	0	0	0.132218	N/A	Yes	0.406047	0.0455323	Yes	8.05447	-2.88457	1.24333	-2.32003	0.0203393	0.137009	other	intronic	0	0	0	0	0	0	0	0	0	0	0	1	0	0
wt_saf_neg_peak_18685	chr10	110777506	110777911	-	406	9	5	2	3	0	0	0	0	Yes	0.242265	0.148081	0.0601001	0.0407149	0	0	0	0	N/A	Yes	0.150149	0	Yes	2.75147	-4.46744	2.00628	-2.22673	0.0259655	NA	other	intronic	0	0	0	1	0	0	0	0	0	0	0	0	0	0
wt_saf_neg_peak_18691	chr10	110934021	110934775	-	755	30	13	16	10	2	0	0	2	Yes	0.80755	0.38501	0.480801	0.135716	0.0607097	0	0	0.132218	N/A	Yes	0.557787	0.0303549	Yes	10.7116	-3.93279	1.2499	-3.14648	0.00165246	0.0235606	other	intronic	0	0	0	0	0	0	0	0	0	0	2	0	0	0
wt_saf_neg_peak_18716	chr10	110988695	110989636	-	942	31	40	26	54	4	7	0	0	Yes	0.834468	1.18464	0.781302	0.732868	0.121419	0.217329	0	0	N/A	No	0.933472	0.169374	Yes	19.5663	-2.18697	0.675031	-3.23981	0.00119609	0.0184315	protein_coding	intronic	0	0	0	3	0	0	0	0	0	0	0	1	0	0
wt_saf_neg_peak_18719	chr10	110995970	110996131	-	162	9	7	5	6	0	0	0	4	Yes	0.242265	0.207313	0.15025	0.0814298	0	0	0	0.264436	N/A	Yes	0.199943	0	Yes	3.66415	-4.87754	1.85826	-2.62479	0.00867013	0.0784035	protein_coding	intronic	0	0	0	0	0	0	0	0	0	0	0	0	0	0
wt_saf_neg_peak_18737	chr10	111501142	111501360	-	219	14	24	15	5	1	2	0	2	Yes	0.376857	0.710787	0.450751	0.0678582	0.0303549	0.0620941	0	0.132218	N/A	Yes	0.512798	0.0462245	Yes	10.041	-3.19536	1.09398	-2.92086	0.00349063	0.0413983	other	intronic	0	0	0	0	0	0	0	0	0	0	0	0	0	0
wt_saf_neg_peak_18746	chr10	112821715	112821800	-	86	16	23	13	5	3	5	0	2	Yes	0.430693	0.681171	0.390651	0.0678582	0.0910646	0.155235	0	0.132218	N/A	Yes	0.500838	0.12315	Yes	10.963	-1.74612	0.84769	-2.05985	0.0394127	0.213136	other	intronic	0	0	0	0	0	0	0	0	0	0	1	0	0	0
wt_saf_neg_peak_18822	chr10	115375082	115375395	-	314	11	18	7	0	2	2	0	0	Yes	0.296102	0.53309	0.21035	0	0.0607097	0.0620941	0	0	N/A	Yes	0.346514	0.0614019	Yes	7.20968	-2.21725	1.10395	-2.00847	0.0445939	0.230451	protein_coding	intronic	0	0	0	0	0	0	0	0	0	0	0	0	0	0
wt_saf_neg_peak_18844	chr10	116470867	116470941	-	75	6	10	3	0	0	0	0	0	Yes	0.16151	0.296161	0.0901502	0	0	0	0	0	N/A	Yes	0.182607	0	Yes	3.31763	-4.73408	1.91748	-2.4689	0.0135528	0.105529	protein_coding	intronic	0	0	0	0	0	0	0	0	0	0	0	0	0	0
wt_saf_neg_peak_18915	chr10	116589962	116590147	-	186	7	4	5	2	0	0	0	1	Yes	0.188428	0.118464	0.15025	0.0271433	0	0	0	0.0661091	N/A	Yes	0.152381	0	Yes	2.80393	-4.49042	1.96689	-2.28301	0.0224299	NA	other	intronic	0	0	0	0	0	0	0	0	0	0	1	1	0	0
wt_saf_neg_peak_18923	chr10	116915301	116915490	-	190	31	26	22	13	4	6	0	2	Yes	0.834468	0.770019	0.661101	0.176431	0.121419	0.186282	0	0.132218	N/A	Yes	0.755196	0.153851	Yes	16.1243	-2.026	0.717125	-2.82517	0.0047255	0.0513729	protein_coding	intronic	0	0	0	1	0	0	0	0	0	0	0	0	0	0
wt_saf_neg_peak_19011	chr10	117337588	117337662	-	75	13	7	12	1	0	2	0	2	Yes	0.349938	0.207313	0.360601	0.0135716	0	0.0620941	0	0.132218	N/A	Yes	0.305951	0.031047	Yes	6.10675	-3.04058	1.36972	-2.21985	0.0264286	0.163532	other	intronic	0	0	0	1	0	0	0	0	0	0	0	0	0	0
wt_saf_neg_peak_19151	chr10	119413347	119413868	-	522	8	5	12	6	0	1	0	4	Yes	0.215347	0.148081	0.360601	0.0814298	0	0.031047	0	0.264436	N/A	Yes	0.241343	0.0155235	Yes	4.68919	-3.70623	1.76796	-2.09633	0.0360527	0.201122	other	intronic	0	0	0	2	0	0	0	0	0	0	0	0	0	0
wt_saf_neg_peak_19196	chr10	119710610	119710685	-	76	3	10	6	0	0	0	0	0	Yes	0.080755	0.296161	0.1803	0	0	0	0	0	N/A	Yes	0.185739	0	Yes	3.37929	-4.75648	1.91475	-2.48412	0.0129871	0.102552	other	intronic	0	0	0	2	0	0	0	0	0	0	1	0	0	0
wt_saf_neg_peak_19197	chr10	119737716	119738169	-	454	7	14	6	0	0	1	0	1	Yes	0.188428	0.414626	0.1803	0	0	0.031047	0	0.0661091	N/A	Yes	0.261118	0.0155235	Yes	4.98179	-3.80179	1.75103	-2.17117	0.0299182	0.177801	other	intronic	0	0	0	0	0	0	0	0	0	0	0	0	0	0
wt_saf_neg_peak_19201	chr10	119996569	119996776	-	208	14	9	6	1	0	1	0	0	Yes	0.376857	0.266545	0.1803	0.0135716	0	0.031047	0	0	N/A	Yes	0.274567	0.0155235	Yes	5.26878	-3.88987	1.73009	-2.24837	0.0245526	0.155635	other	intronic	0	0	0	0	0	0	0	0	2	0	1	0	0	0
wt_saf_neg_peak_19244	chr10	120175284	120176344	-	1061	19	12	15	26	2	3	0	0	Yes	0.511448	0.355393	0.450751	0.352863	0.0607097	0.0931411	0	0	N/A	No	0.439198	0.0769254	Yes	9.21756	-2.24846	0.96982	-2.31843	0.0204261	0.137407	protein_coding	intronic	0	0	0	1	0	0	0	0	0	0	0	1	0	0
wt_saf_neg_peak_19249	chr10	120190923	120191326	-	404	7	8	5	0	0	0	0	0	Yes	0.188428	0.236929	0.15025	0	0	0	0	0	N/A	Yes	0.191869	0	Yes	3.50684	-4.81311	1.8732	-2.56946	0.0101857	0.0874216	protein_coding	intronic	0	0	0	1	0	0	0	0	0	0	0	0	0	0
wt_saf_neg_peak_19259	chr10	120369000	120369907	-	908	25	15	22	4	6	5	0	4	Yes	0.672958	0.444242	0.661101	0.0542865	0.182129	0.155235	0	0.264436	N/A	Yes	0.592767	0.168682	Yes	13.397	-1.55007	0.749724	-2.06752	0.0386853	0.210462	protein_coding	intronic	0	0	0	0	0	0	0	0	0	0	0	0	0	0
wt_saf_neg_peak_19270	chr10	120388501	120388575	-	75	7	2	9	0	0	0	0	0	Yes	0.188428	0.0592322	0.270451	0	0	0	0	0	N/A	Yes	0.172704	0	Yes	3.20076	-4.67802	1.94989	-2.39911	0.0164348	0.119674	protein_coding	intronic	0	0	0	0	0	0	0	0	0	0	0	0	0	0
wt_saf_neg_peak_19480	chr10	121851869	121852178	-	310	2	5	6	2	0	0	0	0	Yes	0.0538367	0.148081	0.1803	0.0271433	0	0	0	0	N/A	Yes	0.127406	0	Yes	2.33413	-4.22034	2.07803	-2.03093	0.0422621	NA	protein_coding	intronic	0	0	0	1	0	0	0	0	0	0	0	1	0	0
wt_saf_neg_peak_19489	chr10	121878476	121878923	-	448	11	9	7	10	0	2	0	1	Yes	0.296102	0.266545	0.21035	0.135716	0	0.0620941	0	0.0661091	N/A	No	0.257666	0.031047	Yes	5.1898	-2.7853	1.41223	-1.97227	0.0485785	0.243381	protein_coding	intronic	0	0	0	1	0	0	0	0	0	0	0	1	0	0
wt_saf_neg_peak_19513	chr10	121947844	121947920	-	77	8	9	2	2	0	0	0	0	Yes	0.215347	0.266545	0.0601001	0.0271433	0	0	0	0	N/A	Yes	0.180664	0	Yes	3.28787	-4.72299	1.93483	-2.44104	0.0146451	0.111075	protein_coding	intronic	0	0	0	0	0	0	0	0	0	0	0	0	0	0
wt_saf_neg_peak_19562	chr10	122056846	122057170	-	325	20	10	20	22	0	4	0	2	Yes	0.538367	0.296161	0.601001	0.298576	0	0.124188	0	0.132218	N/A	No	0.47851	0.0620941	Yes	9.76316	-2.68297	1.05567	-2.54148	0.0110384	0.0922105	other	intronic	0	0	0	1	0	0	0	0	0	0	1	1	0	0
wt_saf_neg_peak_19705	chr10	126865397	126865632	-	236	5	5	4	11	0	0	0	0	Yes	0.134592	0.148081	0.1202	0.149288	0	0	0	0	N/A	No	0.134291	0	Yes	2.45954	-4.30084	2.02343	-2.12552	0.0335435	NA	other	intronic	0	0	0	1	0	0	0	0	0	0	0	1	0	0
wt_saf_neg_peak_19706	chr10	126869937	126870212	-	276	6	13	4	0	1	0	0	1	Yes	0.16151	0.38501	0.1202	0	0.0303549	0	0	0.0661091	N/A	Yes	0.22224	0.0151774	Yes	4.25105	-3.57705	1.80872	-1.97767	0.0479661	0.241412	protein_coding	intronic	0	0	0	0	0	0	0	0	0	0	0	0	0	0
wt_saf_neg_peak_19766	chr10	127171282	127171698	-	417	4	15	11	3	0	0	0	3	Yes	0.107673	0.444242	0.330551	0.0407149	0	0	0	0.198327	N/A	Yes	0.294155	0	Yes	5.35983	-5.4211	1.77273	-3.05804	0.0022279	0.0295586	protein_coding	UTR3	0	0	0	0	0	0	0	0	0	0	0	0	0	0
wt_saf_neg_peak_20064	chr10	128707575	128707706	-	132	24	21	18	7	1	8	0	3	Yes	0.64604	0.621938	0.540901	0.0950014	0.0303549	0.248376	0	0.198327	N/A	Yes	0.60296	0.139366	Yes	13.1413	-1.83837	0.817862	-2.24777	0.0245907	0.155792	other	intronic	0	1	0	0	0	0	0	0	0	0	1	0	0	0
wt_saf_neg_peak_20079	chr10	128745324	128745577	-	254	6	11	6	4	0	0	0	4	Yes	0.16151	0.325777	0.1803	0.0542865	0	0	0	0.264436	N/A	Yes	0.222529	0	Yes	4.05458	-5.02126	1.8297	-2.74431	0.00606377	0.0611856	other	intronic	0	0	0	0	0	0	0	0	0	0	0	0	0	0
wt_saf_neg_peak_20095	chr10	128881114	128881188	-	75	5	6	14	11	0	0	0	1	Yes	0.134592	0.177697	0.420701	0.149288	0	0	0	0.0661091	N/A	No	0.24433	0	Yes	4.50601	-5.1686	1.81797	-2.84307	0.00446813	0.049296	other	intronic	0	0	0	0	0	0	0	0	0	0	0	1	0	0
wt_saf_neg_peak_20523	chr11	4839128	4839335	-	208	16	11	22	10	2	1	0	0	Yes	0.430693	0.325777	0.661101	0.135716	0.0607097	0.031047	0	0	N/A	Yes	0.472524	0.0458784	Yes	9.38479	-3.09981	1.11532	-2.7793	0.00544767	0.0567385	protein_coding	intronic	0	0	0	0	0	0	0	0	0	0	0	1	0	0
wt_saf_neg_peak_20626	chr11	5270484	5270849	-	366	5	4	6	2	0	0	0	3	Yes	0.134592	0.118464	0.1803	0.0271433	0	0	0	0.198327	N/A	Yes	0.144452	0	Yes	2.65796	-4.41065	1.99055	-2.2158	0.0267055	NA	other	intronic	0	0	0	0	0	0	0	0	0	0	0	2	0	0
wt_saf_neg_peak_20657	chr11	5337491	5337565	-	75	14	5	7	2	1	0	0	0	Yes	0.376857	0.148081	0.21035	0.0271433	0.0303549	0	0	0	N/A	Yes	0.245096	0.0151774	Yes	4.7386	-3.74318	1.76868	-2.11637	0.0343136	0.194804	protein_coding	intronic	0	0	0	0	0	0	0	0	0	0	0	0	0	0
wt_saf_neg_peak_20723	chr11	5453819	5454051	-	233	7	9	7	0	1	0	0	3	Yes	0.188428	0.266545	0.21035	0	0.0303549	0	0	0.198327	N/A	Yes	0.221775	0.0151774	Yes	4.27588	-3.58396	1.7801	-2.01335	0.0440777	0.228818	other	intronic	0	0	0	1	0	0	0	0	0	0	0	0	0	0
wt_saf_neg_peak_20824	chr11	6033275	6033760	-	486	16	22	12	8	3	4	0	4	Yes	0.430693	0.651555	0.360601	0.108573	0.0910646	0.124188	0	0.264436	N/A	Yes	0.48095	0.107626	Yes	10.3667	-1.88327	0.880537	-2.13877	0.0324544	0.18766	protein_coding	intronic	0	0	0	1	0	0	0	0	0	0	0	0	0	0
wt_saf_neg_peak_21102	chr11	8989866	8990056	-	191	2	12	11	5	0	1	0	3	Yes	0.0538367	0.355393	0.330551	0.0678582	0	0.031047	0	0.198327	N/A	Yes	0.246594	0.0155235	Yes	4.7331	-3.71805	1.8083	-2.0561	0.039773	0.214353	other	intronic	0	1	0	0	0	0	0	0	0	0	0	0	0	0
wt_saf_neg_peak_21126	chr11	11303387	11303739	-	353	5	15	9	0	0	1	0	1	Yes	0.134592	0.444242	0.270451	0	0	0.031047	0	0.0661091	N/A	Yes	0.283095	0.0155235	Yes	5.3857	-3.91733	1.73915	-2.25244	0.0242947	0.15452	protein_coding	intronic	0	1	0	0	0	0	0	0	0	0	0	0	0	0
wt_saf_neg_peak_21173	chr11	11959831	11960345	-	515	84	71	48	75	31	17	0	4	Yes	2.26114	2.10274	1.4424	1.01787	0.941	0.5278	0	0.264436	N/A	Yes	1.93543	0.7344	Yes	46.2075	-1.1321	0.423964	-2.67026	0.00757923	0.0714894	protein_coding	intronic	0	0	0	0	0	0	0	0	0	0	0	0	0	0
wt_saf_neg_peak_21176	chr11	11965456	11965881	-	426	50	54	28	70	21	8	1	0	Yes	1.34592	1.59927	0.841402	0.950014	0.637452	0.248376	0.0696843	0	N/A	No	1.2622	0.442914	Yes	29.5238	-1.24285	0.539091	-2.30545	0.0211415	0.140589	protein_coding	intronic	0	0	0	0	0	0	0	0	0	0	0	0	0	0
wt_saf_neg_peak_21179	chr11	11969311	11969621	-	311	39	25	19	40	13	4	0	0	Yes	1.04982	0.740403	0.570951	0.542865	0.394613	0.124188	0	0	N/A	No	0.787056	0.259401	Yes	18.225	-1.34122	0.670574	-2.0001	0.0454892	0.233286	protein_coding	intronic	0	0	0	0	0	0	0	0	0	0	0	0	0	0
wt_saf_neg_peak_21183	chr11	11975348	11975422	-	75	5	5	5	4	0	0	0	0	Yes	0.134592	0.148081	0.15025	0.0542865	0	0	0	0	N/A	Yes	0.144308	0	Yes	2.64661	-4.40554	1.988	-2.21607	0.0266867	NA	protein_coding	intronic	0	0	0	0	0	0	0	0	0	0	0	0	0	0
wt_saf_neg_peak_21189	chr11	11986414	11986488	-	75	7	7	6	8	0	0	0	0	Yes	0.188428	0.207313	0.1803	0.108573	0	0	0	0	N/A	No	0.192014	0	Yes	3.51819	-4.81696	1.86854	-2.57792	0.00993961	0.0859971	protein_coding	intronic	0	0	0	0	0	0	0	0	0	0	0	0	0	0
wt_saf_neg_peak_21194	chr11	11992767	11992841	-	75	14	13	6	1	2	0	0	0	Yes	0.376857	0.38501	0.1803	0.0135716	0.0607097	0	0	0	N/A	Yes	0.314056	0.0303549	Yes	6.17652	-3.09737	1.37654	-2.25011	0.024442	0.155171	protein_coding	intronic	0	0	0	0	0	0	0	0	0	0	0	0	0	0
wt_saf_neg_peak_21206	chr11	12012631	12012908	-	278	23	18	16	31	3	7	0	0	Yes	0.619122	0.53309	0.480801	0.420721	0.0910646	0.217329	0	0	N/A	No	0.544338	0.154197	Yes	12.2782	-1.54909	0.787295	-1.96761	0.0491131	0.245119	protein_coding	intronic	0	0	0	0	0	0	0	0	0	0	0	0	0	0
wt_saf_neg_peak_21225	chr11	12241782	12241900	-	119	11	9	11	1	2	1	0	3	Yes	0.296102	0.266545	0.330551	0.0135716	0.0607097	0.031047	0	0.198327	N/A	Yes	0.297732	0.0458784	Yes	6.14292	-2.43129	1.20874	-2.01143	0.0442802	0.229441	protein_coding	intronic	0	1	0	1	0	0	0	0	0	0	0	0	0	0
wt_saf_neg_peak_21231	chr11	12259316	12259428	-	113	21	10	9	1	3	1	0	4	Yes	0.565285	0.296161	0.270451	0.0135716	0.0910646	0.031047	0	0.264436	N/A	Yes	0.377299	0.0610558	Yes	7.82886	-2.3671	1.08934	-2.17297	0.0297823	0.177248	protein_coding	intronic	0	0	0	0	0	0	0	0	0	0	0	0	0	0
wt_saf_neg_peak_21245	chr11	12285326	12285437	-	112	10	11	10	0	0	0	0	1	Yes	0.269183	0.325777	0.300501	0	0	0	0	0.0661091	N/A	Yes	0.298487	0	Yes	5.46896	-5.45271	1.72979	-3.15224	0.00162023	0.023237	protein_coding	intronic	0	0	0	0	0	0	0	0	0	0	0	0	0	0
wt_saf_neg_peak_21298	chr11	12403673	12403747	-	75	2	7	6	2	0	0	0	2	Yes	0.0538367	0.207313	0.1803	0.0271433	0	0	0	0.132218	N/A	Yes	0.14715	0	Yes	2.68559	-4.42346	2.01652	-2.19361	0.0282633	NA	protein_coding	intronic	0	0	0	0	0	0	0	0	0	0	0	0	0	0
wt_saf_neg_peak_21304	chr11	12415581	12415691	-	111	15	5	5	0	0	0	0	3	Yes	0.403775	0.148081	0.15025	0	0	0	0	0.198327	N/A	Yes	0.234035	0	Yes	4.31181	-5.11469	1.83055	-2.79407	0.00520496	0.0549791	protein_coding	intronic	0	0	0	0	0	0	0	0	0	0	0	0	0	0
wt_saf_neg_peak_21336	chr11	12977183	12977270	-	88	11	15	7	13	0	0	0	3	Yes	0.296102	0.444242	0.21035	0.176431	0	0	0	0.198327	N/A	No	0.316898	0	Yes	5.77717	-5.53367	1.72632	-3.20548	0.00134839	0.0202075	other	intronic	0	1	0	0	0	0	0	0	0	0	0	0	0	0
wt_saf_neg_peak_21367	chr11	16937547	16937963	-	417	11	5	4	8	0	0	0	0	Yes	0.296102	0.148081	0.1202	0.108573	0	0	0	0	N/A	No	0.188128	0	Yes	3.45866	-4.79621	1.89592	-2.52975	0.0114143	0.0944045	lncRNA	intronic	0	0	0	0	0	0	0	0	0	0	0	1	0	0
wt_saf_neg_peak_21396	chr11	17930529	17930952	-	424	7	10	8	18	0	1	0	0	Yes	0.188428	0.296161	0.240401	0.244289	0	0.031047	0	0	N/A	No	0.241663	0.0155235	Yes	4.65302	-3.6968	1.75561	-2.10571	0.03523	0.198133	other	intronic	0	1	0	0	0	0	0	0	0	0	0	0	0	0
wt_saf_neg_peak_21436	chr11	18982268	18982562	-	295	10	11	2	6	0	0	0	0	Yes	0.269183	0.325777	0.0601001	0.0814298	0	0	0	0	N/A	Yes	0.218354	0	Yes	3.97237	-4.9961	1.87572	-2.66357	0.00773168	0.0724468	protein_coding	intronic	0	0	0	0	0	0	0	0	0	0	0	0	0	0
wt_saf_neg_peak_21455	chr11	19669468	19669557	-	90	21	13	5	4	1	0	0	0	Yes	0.565285	0.38501	0.15025	0.0542865	0.0303549	0	0	0	N/A	Yes	0.366848	0.0151774	Yes	6.93592	-4.31588	1.69039	-2.55319	0.0106741	0.0901343	other	intronic	0	0	0	0	0	0	0	0	0	0	1	0	0	0
wt_saf_neg_peak_21481	chr11	20035248	20035803	-	556	14	10	5	9	0	1	0	0	Yes	0.376857	0.296161	0.15025	0.122145	0	0.031047	0	0	N/A	Yes	0.274423	0.0155235	Yes	5.25744	-3.88703	1.73599	-2.23909	0.0251501	0.158252	other	intronic	0	0	0	0	0	0	0	0	0	0	0	0	0	0
wt_saf_neg_peak_21528	chr11	20188700	20189137	-	438	8	8	5	3	0	0	0	0	Yes	0.215347	0.236929	0.15025	0.0407149	0	0	0	0	N/A	Yes	0.200842	0	Yes	3.67336	-4.8806	1.85656	-2.62884	0.00856769	0.0777557	other	intronic	0	0	0	1	0	0	0	0	0	0	1	2	0	0
wt_saf_neg_peak_21560	chr11	20502289	20502745	-	457	6	14	6	3	0	0	0	3	Yes	0.16151	0.414626	0.1803	0.0407149	0	0	0	0.198327	N/A	Yes	0.252145	0	Yes	4.58177	-5.19774	1.80191	-2.88457	0.00391947	0.0449671	other	intronic	0	0	0	1	0	0	0	0	0	0	2	0	0	0
wt_saf_neg_peak_21571	chr11	20601412	20601612	-	201	10	15	7	4	1	1	0	1	Yes	0.269183	0.444242	0.21035	0.0542865	0.0303549	0.031047	0	0.0661091	N/A	Yes	0.307925	0.0307009	Yes	6.06331	-3.04888	1.35782	-2.24541	0.0247416	0.156473	other	intronic	0	1	0	0	0	0	0	0	0	0	0	0	0	0
wt_saf_neg_peak_21573	chr11	20610181	20610346	-	166	28	32	16	10	3	8	0	2	Yes	0.753713	0.947716	0.480801	0.135716	0.0910646	0.248376	0	0.132218	N/A	Yes	0.72741	0.16972	Yes	15.8045	-1.82228	0.736471	-2.47435	0.0133481	0.104501	other	intronic	0	0	0	0	0	0	0	0	0	0	1	1	0	0
wt_saf_neg_peak_21612	chr11	21144129	21144390	-	262	5	5	3	4	0	0	0	3	Yes	0.134592	0.148081	0.0901502	0.0542865	0	0	0	0.198327	N/A	Yes	0.124274	0	Yes	2.27247	-4.18793	2.06773	-2.02537	0.0428294	NA	other	intronic	0	0	0	1	0	0	0	0	0	0	0	0	0	0
wt_saf_neg_peak_21614	chr11	21237141	21237314	-	174	4	5	6	0	0	0	0	0	Yes	0.107673	0.148081	0.1803	0	0	0	0	0	N/A	Yes	0.145351	0	Yes	2.66717	-4.41486	1.9898	-2.21874	0.0265041	NA	other	intronic	0	0	0	1	0	0	0	0	0	0	0	0	0	0
wt_saf_neg_peak_21803	chr11	22778385	22778609	-	225	6	8	3	6	0	0	0	0	Yes	0.16151	0.236929	0.0901502	0.0814298	0	0	0	0	N/A	No	0.162863	0	Yes	2.96617	-4.57271	1.95393	-2.34026	0.0192701	0.132319	other	intronic	0	0	1	0	0	0	0	0	0	0	0	0	0	0
wt_saf_neg_peak_21805	chr11	22785657	22785733	-	77	8	7	0	0	0	0	0	0	Yes	0.215347	0.207313	0	0	0	0	0	0	N/A	Yes	0.140886	0	Yes	2.56226	-4.36494	2.17454	-2.00729	0.0447189	NA	other	intronic	0	0	0	0	0	0	0	0	0	0	0	0	0	0
wt_saf_neg_peak_21809	chr11	22793234	22793310	-	77	6	8	4	0	0	0	0	0	Yes	0.16151	0.236929	0.1202	0	0	0	0	0	N/A	Yes	0.17288	0	Yes	3.15325	-4.66001	1.91986	-2.42727	0.015213	0.113789	other	intronic	0	0	1	0	0	0	0	0	0	0	0	1	0	0
wt_saf_neg_peak_21810	chr11	22798106	22798352	-	247	10	14	2	39	0	1	0	1	Yes	0.269183	0.414626	0.0601001	0.529294	0	0.031047	0	0.0661091	N/A	No	0.24797	0.0155235	Yes	4.73305	-3.72678	1.80381	-2.06606	0.038823	0.210928	other	intronic	0	0	0	0	0	0	0	0	0	0	0	0	0	0
wt_saf_neg_peak_21811	chr11	22799201	22799451	-	251	8	14	14	16	4	0	0	3	Yes	0.215347	0.414626	0.420701	0.217146	0.121419	0	0	0.198327	N/A	No	0.350224	0.0607097	Yes	7.28805	-2.25782	1.13934	-1.9817	0.047513	0.239903	other	intronic	0	0	0	2	0	0	0	0	0	0	0	0	0	0
wt_saf_neg_peak_21820	chr11	22819511	22819585	-	75	16	15	8	14	2	3	0	0	Yes	0.430693	0.444242	0.240401	0.190003	0.0607097	0.0931411	0	0	N/A	Yes	0.371779	0.0769254	Yes	7.93566	-2.00103	1.01668	-1.9682	0.0490447	0.24492	other	intronic	0	0	0	0	0	0	0	0	0	0	1	1	0	0
wt_saf_neg_peak_21937	chr11	23597013	23597229	-	217	14	7	10	7	1	0	0	4	Yes	0.376857	0.207313	0.300501	0.0950014	0.0303549	0	0	0.264436	N/A	Yes	0.29489	0.0151774	Yes	5.65128	-4.006	1.71143	-2.34074	0.0192456	0.132248	protein_coding	intronic	0	0	0	1	0	0	0	0	0	0	0	1	0	0
wt_saf_neg_peak_22005	chr11	25678577	25678767	-	191	4	8	5	0	0	0	0	0	Yes	0.107673	0.236929	0.15025	0	0	0	0	0	N/A	Yes	0.164951	0	Yes	3.00728	-4.58935	1.943	-2.36199	0.018177	0.127516	protein_coding	intronic	0	1	0	0	0	0	0	0	0	0	0	0	0	0
wt_saf_neg_peak_22044	chr11	25937385	25937742	-	358	5	10	3	0	0	0	0	3	Yes	0.134592	0.296161	0.0901502	0	0	0	0	0.198327	N/A	Yes	0.173634	0	Yes	3.15111	-4.65921	1.94064	-2.40087	0.0163564	0.119305	protein_coding	intronic	0	0	0	0	0	0	0	0	0	0	0	0	0	0
wt_saf_neg_peak_22075	chr11	26148817	26148982	-	166	6	11	10	7	0	0	0	0	Yes	0.16151	0.325777	0.300501	0.0950014	0	0	0	0	N/A	Yes	0.262596	0	Yes	4.80288	-5.26347	1.77633	-2.96311	0.00304545	0.0374287	protein_coding	intronic	0	0	0	0	0	0	0	0	0	0	0	0	0	0
wt_saf_neg_peak_22120	chr11	26536120	26536559	-	440	11	10	17	14	2	1	0	0	Yes	0.296102	0.296161	0.510851	0.190003	0.0607097	0.031047	0	0	N/A	No	0.367705	0.0458784	Yes	7.44109	-2.73563	1.16689	-2.34439	0.0190585	0.131452	protein_coding	intronic	0	0	0	0	0	0	0	0	0	0	0	0	0	0
wt_saf_neg_peak_22153	chr11	28142997	28143164	-	168	103	69	40	91	32	28	0	3	Yes	2.77259	2.04351	1.202	1.23502	0.971355	0.869317	0	0.198327	N/A	No	2.00603	0.920336	Yes	50.3109	-0.8577	0.424297	-2.02146	0.0432322	0.22614	other	intronic	0	0	0	1	0	0	0	0	0	0	0	0	0	0
wt_saf_neg_peak_22160	chr11	28360662	28360884	-	223	5	2	6	5	0	0	0	0	Yes	0.134592	0.0592322	0.1803	0.0678582	0	0	0	0	N/A	No	0.124708	0	Yes	2.3065	-4.20572	2.08134	-2.02068	0.043313	NA	other	intronic	0	0	0	1	0	0	0	0	0	0	0	0	0	0
wt_saf_neg_peak_22171	chr11	28401199	28401639	-	441	7	10	5	0	0	0	0	0	Yes	0.188428	0.296161	0.15025	0	0	0	0	0	N/A	Yes	0.211613	0	Yes	3.8583	-4.95088	1.84426	-2.68448	0.00726423	0.0693967	protein_coding	intronic	0	0	0	0	0	0	0	0	0	0	0	0	0	0
wt_saf_neg_peak_22202	chr11	28481686	28482187	-	502	27	35	29	10	10	10	0	3	Yes	0.726795	1.03656	0.871452	0.135716	0.303549	0.31047	0	0.198327	N/A	Yes	0.87827	0.307009	Yes	20.5983	-1.24278	0.589469	-2.1083	0.0350053	0.197296	protein_coding	intronic	0	1	0	0	0	0	0	0	1	0	0	0	0	0
wt_saf_neg_peak_22272	chr11	29409339	29409431	-	93	6	10	7	2	1	0	0	0	Yes	0.16151	0.296161	0.21035	0.0271433	0.0303549	0	0	0	N/A	Yes	0.222674	0.0151774	Yes	4.28509	-3.58673	1.7841	-2.01038	0.0443905	0.229793	other	intronic	0	0	0	0	0	0	0	0	0	0	2	0	0	0
wt_saf_neg_peak_22289	chr11	29703784	29703920	-	137	2	6	6	7	0	0	0	0	Yes	0.0538367	0.177697	0.1803	0.0950014	0	0	0	0	N/A	No	0.137278	0	Yes	2.50986	-4.32547	2.04465	-2.11551	0.0343869	NA	other	intronic	0	0	0	0	0	0	0	0	0	0	0	1	0	0
wt_saf_neg_peak_22296	chr11	29955952	29956450	-	499	9	5	11	0	0	1	0	2	Yes	0.242265	0.148081	0.330551	0	0	0.031047	0	0.132218	N/A	Yes	0.240299	0.0155235	Yes	4.66864	-3.70072	1.76543	-2.09621	0.0360633	0.201161	protein_coding	intronic	0	1	0	0	0	0	0	0	0	0	0	0	0	0
wt_saf_neg_peak_22370	chr11	30234432	30234562	-	131	4	6	6	8	0	0	0	2	Yes	0.107673	0.177697	0.1803	0.108573	0	0	0	0.132218	N/A	No	0.155223	0	Yes	2.8429	-4.50712	1.96171	-2.29755	0.0215875	NA	protein_coding	intronic	0	0	0	0	0	0	0	0	0	0	0	1	0	0
wt_saf_neg_peak_22413	chr11	30592266	30592682	-	417	3	11	8	11	0	0	0	0	Yes	0.080755	0.325777	0.240401	0.149288	0	0	0	0	N/A	No	0.215644	0	Yes	3.92917	-4.97311	1.86502	-2.66652	0.00766418	0.0720303	protein_coding	intronic	0	0	0	0	0	0	0	0	0	0	0	0	0	0
wt_saf_neg_peak_22472	chr11	30771421	30771500	-	80	3	9	5	0	0	0	0	0	Yes	0.080755	0.266545	0.15025	0	0	0	0	0	N/A	Yes	0.16585	0	Yes	3.01649	-4.59313	1.95651	-2.34761	0.0188942	0.130696	other	intronic	0	0	0	0	0	0	0	0	0	0	0	0	0	0
wt_saf_neg_peak_22863	chr11	37840604	37840682	-	79	10	12	7	0	0	1	0	0	Yes	0.269183	0.355393	0.21035	0	0	0.031047	0	0	N/A	Yes	0.278309	0.0155235	Yes	5.31696	-3.90148	1.72127	-2.26662	0.0234132	0.150649	other	intronic	0	0	0	0	0	0	0	0	0	0	1	0	0	0
wt_saf_neg_peak_22868	chr11	40415185	40415272	-	88	2	6	5	8	0	0	1	1	Yes	0.0538367	0.177697	0.15025	0.108573	0	0	0.0696843	0.0661091	N/A	No	0.127261	0	Yes	2.32278	-4.21446	2.0794	-2.02677	0.0426857	NA	other	intronic	0	1	0	0	0	0	0	0	0	0	0	0	0	0
wt_saf_neg_peak_22940	chr11	44445246	44445428	-	183	8	1	7	0	0	0	0	3	Yes	0.215347	0.0296161	0.21035	0	0	0	0	0.198327	N/A	Yes	0.151771	0	Yes	2.81741	-4.49609	2.03172	-2.21294	0.0269015	NA	other	intronic	0	0	0	1	0	0	0	0	0	0	0	1	0	0
wt_saf_neg_peak_23056	chr11	47154737	47155123	-	387	7	7	4	0	0	0	0	0	Yes	0.188428	0.207313	0.1202	0	0	0	0	0	N/A	Yes	0.17198	0	Yes	3.14404	-4.65646	1.91847	-2.42718	0.0152169	0.113789	protein_coding	intronic	0	0	0	0	0	0	0	0	0	0	0	1	0	0
wt_saf_neg_peak_23060	chr11	47249980	47250514	-	535	9	4	8	0	0	0	0	4	Yes	0.242265	0.118464	0.240401	0	0	0	0	0.264436	N/A	Yes	0.200377	0	Yes	3.69819	-4.88858	1.8647	-2.62164	0.00875075	0.0789049	protein_coding	intronic	0	0	0	0	0	0	0	0	0	0	0	1	0	0
wt_saf_neg_peak_23082	chr11	47926249	47926608	-	360	3	9	5	3	0	0	0	0	Yes	0.080755	0.266545	0.15025	0.0407149	0	0	0	0	N/A	Yes	0.16585	0	Yes	3.01649	-4.59313	1.95651	-2.34761	0.0188942	0.130696	other	intronic	0	1	0	0	0	0	0	0	0	0	0	0	0	0
wt_saf_neg_peak_23117	chr11	48864588	48864858	-	271	11	5	8	0	0	0	0	3	Yes	0.296102	0.148081	0.240401	0	0	0	0	0.198327	N/A	Yes	0.228194	0	Yes	4.20696	-5.07563	1.81777	-2.79223	0.00523456	0.0551806	other	intronic	0	0	0	0	0	0	0	0	0	0	0	1	0	0
wt_saf_neg_peak_23166	chr11	49826955	49827116	-	162	6	6	1	3	0	0	0	0	Yes	0.16151	0.177697	0.0300501	0.0407149	0	0	0	0	N/A	Yes	0.123086	0	Yes	2.24057	-4.17059	2.12625	-1.96148	0.0498234	NA	other	intronic	0	0	1	0	0	0	0	0	0	0	0	0	0	0
wt_saf_neg_peak_23167	chr11	49838389	49838479	-	91	5	7	1	0	0	0	0	3	Yes	0.134592	0.207313	0.0300501	0	0	0	0	0.198327	N/A	Yes	0.123985	0	Yes	2.24978	-4.17562	2.12736	-1.96282	0.0496676	NA	other	intronic	0	0	0	0	0	0	0	0	0	0	0	0	0	0
wt_saf_neg_peak_23284	chr11	50882518	50882754	-	237	10	6	3	0	0	0	0	0	Yes	0.269183	0.177697	0.0901502	0	0	0	0	0	N/A	Yes	0.17901	0	Yes	3.28079	-4.72042	1.91924	-2.45952	0.0139121	0.107376	protein_coding	intronic	0	0	0	0	0	0	0	0	0	0	0	1	0	0
wt_saf_neg_peak_23482	chr11	53152756	53153078	-	323	1	6	6	0	0	0	0	0	Yes	0.0269183	0.177697	0.1803	0	0	0	0	0	N/A	Yes	0.128305	0	Yes	2.34334	-4.22549	2.11276	-1.99999	0.0455017	NA	other	intronic	0	0	0	1	0	0	0	0	0	0	0	0	0	0
wt_saf_neg_peak_23661	chr11	54378341	54378485	-	145	6	2	6	6	0	0	0	0	Yes	0.16151	0.0592322	0.1803	0.0814298	0	0	0	0	N/A	No	0.133681	0	Yes	2.47302	-4.3073	2.04837	-2.1028	0.0354833	NA	other	intronic	0	0	0	0	0	0	0	0	0	0	0	0	0	0
wt_saf_neg_peak_23793	chr11	55258649	55259267	-	619	37	54	19	3	6	9	0	0	Yes	0.995978	1.59927	0.570951	0.0407149	0.182129	0.279423	0	0	N/A	Yes	1.0554	0.230776	Yes	22.6215	-1.91285	0.64675	-2.95764	0.00310006	0.0379256	protein_coding	intronic	0	1	0	0	0	0	0	0	0	0	0	1	0	0
wt_saf_neg_peak_23965	chr11	59078009	59078365	-	357	5	10	2	5	0	0	0	0	Yes	0.134592	0.296161	0.0601001	0.0678582	0	0	0	0	N/A	No	0.163618	0	Yes	2.96404	-4.57179	1.9829	-2.30561	0.0211324	0.140549	protein_coding	exonic	0	0	0	0	0	0	0	0	0	0	0	0	0	0
wt_saf_neg_peak_24003	chr11	59410914	59411068	-	155	15	5	14	18	1	2	0	0	Yes	0.403775	0.148081	0.420701	0.244289	0.0303549	0.0620941	0	0	N/A	No	0.324185	0.0462245	Yes	6.68164	-2.5519	1.21595	-2.09869	0.0358441	0.20036	protein_coding	intronic	0	0	0	0	0	0	0	0	0	0	0	0	0	0
wt_saf_neg_peak_24156	chr11	60306454	60306641	-	188	6	2	5	0	0	0	0	0	Yes	0.16151	0.0592322	0.15025	0	0	0	0	0	N/A	Yes	0.123664	0	Yes	2.28595	-4.19488	2.08388	-2.01301	0.0441134	NA	protein_coding	intronic	0	0	0	0	0	0	0	0	0	0	0	1	0	0
wt_saf_neg_peak_24217	chr11	60762834	60762910	-	77	6	10	2	0	0	0	0	1	Yes	0.16151	0.296161	0.0601001	0	0	0	0	0.0661091	N/A	Yes	0.17259	0	Yes	3.13056	-4.65118	1.95805	-2.37541	0.0175294	0.124871	protein_coding	intronic	0	0	0	0	0	0	0	0	0	0	0	1	0	0
wt_saf_neg_peak_24240	chr11	60851653	60851940	-	288	1	7	5	0	0	0	0	0	Yes	0.0269183	0.207313	0.15025	0	0	0	0	0	N/A	Yes	0.12816	0	Yes	2.33199	-4.21958	2.11654	-1.99362	0.0461932	NA	other	intronic	0	0	0	0	0	0	0	0	0	0	0	0	0	0
wt_saf_neg_peak_24611	chr11	62706909	62707212	-	304	7	6	7	0	0	0	0	1	Yes	0.188428	0.177697	0.21035	0	0	0	0	0.0661091	N/A	Yes	0.192158	0	Yes	3.52953	-4.8208	1.86816	-2.58051	0.00986559	0.0855956	protein_coding	intronic	0	0	0	0	0	0	0	0	0	0	0	0	0	0
wt_saf_neg_peak_24826	chr11	66213475	66214358	-	884	10	19	11	35	0	2	0	1	Yes	0.269183	0.562706	0.330551	0.475007	0	0.0620941	0	0.0661091	N/A	No	0.38748	0.031047	Yes	7.52886	-3.36655	1.31688	-2.55646	0.0105745	0.0896152	other	intronic	0	0	0	0	0	0	0	0	0	0	0	0	0	0
wt_saf_neg_peak_24832	chr11	66225933	66226269	-	337	17	4	8	5	0	0	0	4	Yes	0.457612	0.118464	0.240401	0.0678582	0	0	0	0.264436	N/A	Yes	0.272159	0	Yes	5.03035	-5.33565	1.7912	-2.97882	0.00289365	0.0359913	protein_coding	intronic	0	0	0	0	0	0	0	0	0	0	0	0	0	0
wt_saf_neg_peak_24833	chr11	66229429	66229844	-	416	9	3	14	8	0	1	0	0	Yes	0.242265	0.0888483	0.420701	0.108573	0	0.031047	0	0	N/A	Yes	0.250605	0.0155235	Yes	4.8784	-3.76558	1.7837	-2.11111	0.0347626	0.196392	protein_coding	intronic	0	1	0	0	0	0	0	0	0	0	0	0	0	0
wt_saf_neg_peak_24835	chr11	66232920	66233086	-	167	5	7	5	0	0	0	0	0	Yes	0.134592	0.207313	0.15025	0	0	0	0	0	N/A	Yes	0.164052	0	Yes	2.99807	-4.5856	1.93581	-2.36883	0.0178444	0.126104	protein_coding	intronic	0	0	0	0	0	0	0	0	0	0	0	0	0	0
wt_saf_neg_peak_24839	chr11	66248732	66249780	-	1049	11	12	21	6	1	0	0	0	Yes	0.296102	0.355393	0.631051	0.0814298	0.0303549	0	0	0	N/A	Yes	0.427515	0.0151774	Yes	8.08818	-4.5351	1.64353	-2.75937	0.00579131	0.0593317	protein_coding	intronic	0	1	0	0	0	0	0	0	0	0	0	0	0	0
wt_saf_neg_peak_24842	chr11	66254010	66254458	-	449	10	8	8	7	1	0	0	0	Yes	0.269183	0.236929	0.240401	0.0950014	0.0303549	0	0	0	N/A	Yes	0.248838	0.0151774	Yes	4.78678	-3.75573	1.74619	-2.15081	0.0314911	0.183866	protein_coding	intronic	0	0	0	0	0	0	0	0	0	0	0	0	0	0
wt_saf_neg_peak_24848	chr11	66263230	66263805	-	576	31	10	23	14	2	2	0	2	Yes	0.834468	0.296161	0.691151	0.190003	0.0607097	0.0620941	0	0.132218	N/A	Yes	0.60726	0.0614019	Yes	12.1274	-3.04856	0.994961	-3.064	0.00218398	0.0291112	protein_coding	intronic	0	0	0	0	0	0	0	0	0	0	0	1	0	0
wt_saf_neg_peak_24849	chr11	66266115	66266817	-	703	2	21	23	1	0	3	0	4	Yes	0.0538367	0.621938	0.691151	0.0135716	0	0.0931411	0	0.264436	N/A	Yes	0.455642	0.0465706	Yes	9.02655	-3.00809	1.25825	-2.39069	0.0168167	0.121589	protein_coding	intronic	0	0	0	0	0	0	0	0	0	0	0	1	0	0
wt_saf_neg_peak_24857	chr11	66298825	66299511	-	687	17	18	21	9	5	0	0	1	Yes	0.457612	0.53309	0.631051	0.122145	0.151774	0	0	0.0661091	N/A	Yes	0.540584	0.0758871	Yes	11.0183	-2.5652	0.966361	-2.65449	0.00794278	0.0738031	protein_coding	intronic	0	2	0	1	0	0	0	0	0	0	0	0	0	0
wt_saf_neg_peak_24860	chr11	66303282	66303387	-	106	7	19	8	5	0	0	0	2	Yes	0.188428	0.562706	0.240401	0.0678582	0	0	0	0.132218	N/A	Yes	0.330512	0	Yes	6.00108	-5.58673	1.73463	-3.2207	0.00127877	0.0193793	protein_coding	intronic	0	1	0	0	0	0	0	0	0	0	0	0	0	0
wt_saf_neg_peak_24867	chr11	66330040	66330422	-	383	12	7	3	3	0	0	0	0	Yes	0.32302	0.207313	0.0901502	0.0407149	0	0	0	0	N/A	Yes	0.206828	0	Yes	3.78956	-4.92884	1.873	-2.63153	0.00850022	0.0773646	protein_coding	intronic	0	0	0	0	0	0	0	0	0	0	0	0	0	0
wt_saf_neg_peak_24868	chr11	66331267	66331444	-	178	14	1	7	9	0	0	0	0	Yes	0.376857	0.0296161	0.21035	0.122145	0	0	0	0	N/A	No	0.205608	0	Yes	3.81653	-4.93688	1.93459	-2.5519	0.0107138	0.0903787	protein_coding	intronic	0	0	0	0	0	0	0	0	0	0	0	0	0	0
wt_saf_neg_peak_24871	chr11	66343305	66343852	-	548	13	12	23	0	6	0	0	2	Yes	0.349938	0.355393	0.691151	0	0.182129	0	0	0.132218	N/A	Yes	0.465494	0.0910646	Yes	9.89118	-2.09448	0.994691	-2.10566	0.0352336	0.198133	protein_coding	intronic	0	0	0	3	0	0	0	0	0	0	0	0	0	0
wt_saf_neg_peak_24873	chr11	66345173	66346036	-	864	33	26	26	46	5	3	0	4	Yes	0.888305	0.770019	0.781302	0.624295	0.151774	0.0931411	0	0.264436	N/A	No	0.813209	0.122458	Yes	16.7243	-2.46439	0.745498	-3.30569	0.000947419	0.0153679	protein_coding	intronic	0	0	2	1	0	0	0	0	0	0	0	0	0	0
wt_saf_neg_peak_24874	chr11	66347675	66347903	-	229	13	13	12	16	3	0	0	3	Yes	0.349938	0.38501	0.360601	0.217146	0.0910646	0	0	0.198327	N/A	No	0.365183	0.0455323	Yes	7.35161	-2.73355	1.18325	-2.31021	0.0208766	0.139385	protein_coding	intronic	0	1	0	0	0	0	0	0	0	0	0	0	0	0
wt_saf_neg_peak_24883	chr11	66362255	66362798	-	544	21	11	22	2	7	1	0	0	Yes	0.565285	0.325777	0.661101	0.0271433	0.212484	0.031047	0	0	N/A	Yes	0.517388	0.121766	Yes	11.3132	-1.83099	0.884219	-2.07074	0.038383	0.209393	protein_coding	intronic	0	0	0	0	0	0	0	0	0	0	2	0	0	0
wt_saf_neg_peak_24886	chr11	66371892	66372118	-	227	4	11	17	9	1	2	0	0	Yes	0.107673	0.325777	0.510851	0.122145	0.0303549	0.0620941	0	0	N/A	Yes	0.314767	0.0462245	Yes	6.46552	-2.49302	1.24793	-1.99773	0.0457464	0.234134	protein_coding	intronic	0	0	0	0	0	0	0	0	0	0	0	0	0	0
wt_saf_neg_peak_24888	chr11	66374530	66374799	-	270	3	12	8	2	1	0	0	3	Yes	0.080755	0.355393	0.240401	0.0271433	0.0303549	0	0	0.198327	N/A	Yes	0.225516	0.0151774	Yes	4.32406	-3.59868	1.81241	-1.98558	0.0470805	0.238437	protein_coding	intronic	0	0	0	0	0	0	0	0	0	0	0	0	0	0
wt_saf_neg_peak_24890	chr11	66385885	66386415	-	531	5	14	6	7	0	0	0	0	Yes	0.134592	0.414626	0.1803	0.0950014	0	0	0	0	N/A	No	0.243173	0	Yes	4.41525	-5.14386	1.81927	-2.82744	0.00469223	0.0511192	protein_coding	intronic	0	0	0	0	0	0	0	0	0	0	0	0	0	0
wt_saf_neg_peak_24893	chr11	66400822	66402082	-	1261	38	26	26	14	7	4	0	0	Yes	1.0229	0.770019	0.781302	0.190003	0.212484	0.124188	0	0	N/A	Yes	0.858072	0.168336	Yes	18.2288	-2.08512	0.684981	-3.04406	0.00233405	0.0305818	protein_coding	intronic	1	2	0	0	0	0	0	0	0	0	0	0	0	0
wt_saf_neg_peak_24895	chr11	66405982	66406919	-	938	16	33	27	6	0	2	0	0	Yes	0.430693	0.977332	0.811352	0.0814298	0	0.0620941	0	0	N/A	Yes	0.739792	0.031047	Yes	13.9814	-4.30577	1.20096	-3.58529	0.000336707	0.0067712	protein_coding	intronic	0	0	0	0	0	0	0	0	0	0	1	1	0	0
wt_saf_neg_peak_24901	chr11	66418683	66419023	-	341	16	16	6	14	1	0	0	0	Yes	0.430693	0.473858	0.1803	0.190003	0.0303549	0	0	0	N/A	Yes	0.361617	0.0151774	Yes	6.81759	-4.28849	1.68024	-2.55231	0.010701	0.0903045	protein_coding	intronic	0	0	0	0	0	0	0	0	0	0	0	0	0	0
wt_saf_neg_peak_24902	chr11	66420377	66420525	-	149	5	5	7	0	0	0	0	0	Yes	0.134592	0.148081	0.21035	0	0	0	0	0	N/A	Yes	0.164341	0	Yes	3.02076	-4.5946	1.93449	-2.3751	0.0175444	0.124878	protein_coding	intronic	0	0	0	0	0	0	0	0	0	0	0	0	0	0
wt_saf_neg_peak_24904	chr11	66422233	66422309	-	77	4	8	7	0	0	0	0	2	Yes	0.107673	0.236929	0.21035	0	0	0	0	0.132218	N/A	Yes	0.184984	0	Yes	3.38143	-4.75709	1.89666	-2.50813	0.0121371	0.0982789	protein_coding	intronic	0	0	0	0	0	0	0	0	0	0	0	0	0	0
wt_saf_neg_peak_24911	chr11	66445080	66446175	-	1096	42	26	27	30	10	3	0	0	Yes	1.13057	0.770019	0.811352	0.407149	0.303549	0.0931411	0	0	N/A	No	0.90398	0.198345	Yes	19.5059	-1.92706	0.671836	-2.86835	0.00412624	0.046594	protein_coding	intronic	0	1	0	0	0	0	0	0	0	0	0	0	0	0
wt_saf_neg_peak_24914	chr11	66457216	66457543	-	328	12	7	13	0	0	2	0	0	Yes	0.32302	0.207313	0.390651	0	0	0.0620941	0	0	N/A	Yes	0.306995	0.031047	Yes	6.1273	-3.04492	1.3699	-2.22274	0.0262334	0.162693	protein_coding	intronic	0	0	0	1	0	0	0	0	0	0	0	0	0	0
wt_saf_neg_peak_24915	chr11	66458052	66458632	-	581	17	10	29	31	4	3	4	0	Yes	0.457612	0.296161	0.871452	0.420721	0.121419	0.0931411	0.278737	0	N/A	No	0.541742	0.10728	Yes	11.5904	-2.07503	0.888584	-2.33521	0.0195325	0.133475	protein_coding	intronic	0	0	0	0	0	0	0	0	0	0	0	0	0	0
wt_saf_neg_peak_24916	chr11	66459523	66460577	-	1055	39	24	55	35	22	5	0	1	Yes	1.04982	0.710787	1.65275	0.475007	0.667807	0.155235	0	0.0661091	N/A	Yes	1.13779	0.411521	Yes	26.9899	-1.21393	0.609094	-1.99301	0.0462603	0.235786	protein_coding	intronic	0	0	1	0	0	0	0	0	0	0	0	0	0	0
wt_saf_neg_peak_24917	chr11	66467211	66467469	-	259	7	3	10	6	0	0	0	0	Yes	0.188428	0.0888483	0.300501	0.0814298	0	0	0	0	N/A	Yes	0.192592	0	Yes	3.56357	-4.83245	1.89478	-2.5504	0.0107601	0.0906459	protein_coding	intronic	0	0	0	1	0	0	0	0	0	0	0	0	0	0
wt_saf_neg_peak_24924	chr11	66482350	66483031	-	682	17	5	15	12	3	0	0	0	Yes	0.457612	0.148081	0.450751	0.16286	0.0910646	0	0	0	N/A	Yes	0.352148	0.0455323	Yes	7.17308	-2.69632	1.23437	-2.18437	0.028935	0.173873	protein_coding	intronic	0	0	0	0	0	0	0	0	0	0	0	0	0	0
wt_saf_neg_peak_24927	chr11	66492541	66493467	-	927	38	39	53	22	12	10	0	1	Yes	1.0229	1.15503	1.59265	0.298576	0.364258	0.31047	0	0.0661091	N/A	Yes	1.25686	0.337364	Yes	28.061	-1.62912	0.536797	-3.03489	0.00240621	0.0313165	protein_coding	intronic	0	0	0	0	0	0	0	0	0	0	0	0	0	0
wt_saf_neg_peak_24928	chr11	66497395	66497469	-	75	7	5	7	0	0	0	0	0	Yes	0.188428	0.148081	0.21035	0	0	0	0	0	N/A	Yes	0.182286	0	Yes	3.3538	-4.74705	1.89016	-2.51145	0.0120237	0.0977059	protein_coding	intronic	0	0	0	0	0	0	0	0	0	0	0	0	0	0
wt_saf_neg_peak_24938	chr11	66517069	66517454	-	386	16	17	22	8	0	3	0	1	Yes	0.430693	0.503474	0.661101	0.108573	0	0.0931411	0	0.0661091	N/A	Yes	0.531756	0.0465706	Yes	10.4678	-3.24712	1.09563	-2.9637	0.00303967	0.0373813	protein_coding	intronic	0	0	0	0	0	0	0	0	0	0	0	0	0	0
wt_saf_neg_peak_24942	chr11	66523325	66523714	-	390	15	31	26	48	2	3	0	0	Yes	0.403775	0.9181	0.781302	0.651438	0.0607097	0.0931411	0	0	N/A	No	0.701059	0.0769254	Yes	13.9481	-2.9111	0.897698	-3.24285	0.00118342	0.0182734	protein_coding	intronic	0	0	1	0	0	0	0	0	0	0	0	0	0	0
wt_saf_neg_peak_24984	chr11	68197140	68197467	-	328	10	14	9	4	0	2	0	0	Yes	0.269183	0.414626	0.270451	0.0542865	0	0.0620941	0	0	N/A	Yes	0.318087	0.031047	Yes	6.27607	-3.08416	1.35631	-2.27393	0.0229701	0.148704	other	intronic	0	0	0	0	0	0	0	0	0	0	0	0	0	0
wt_saf_neg_peak_24985	chr11	68200979	68201517	-	539	20	11	10	1	1	1	0	0	Yes	0.538367	0.325777	0.300501	0.0135716	0.0303549	0.031047	0	0	N/A	Yes	0.388215	0.0307009	Yes	7.58682	-3.39729	1.30116	-2.61097	0.00902847	0.0805061	other	intronic	0	0	0	0	0	0	0	0	0	0	1	0	0	0
wt_saf_neg_peak_24988	chr11	68221351	68221676	-	326	18	15	5	12	4	0	0	0	Yes	0.48453	0.444242	0.15025	0.16286	0.121419	0	0	0	N/A	Yes	0.359674	0.0607097	Yes	7.44531	-2.3004	1.1586	-1.9855	0.0470885	0.238465	protein_coding	intronic	0	0	0	0	0	0	0	0	0	0	0	0	0	0
wt_saf_neg_peak_24989	chr11	68223322	68224521	-	1200	54	36	34	43	9	3	0	2	Yes	1.45359	1.06618	1.0217	0.58358	0.273194	0.0931411	0	0.132218	N/A	No	1.18049	0.183167	Yes	24.3518	-2.42397	0.636939	-3.80565	0.00014143	0.00331214	protein_coding	intronic	0	0	0	0	0	0	0	0	0	0	0	0	0	0
wt_saf_neg_peak_24992	chr11	68227864	68228086	-	223	14	14	8	13	1	0	0	0	Yes	0.376857	0.414626	0.240401	0.176431	0.0303549	0	0	0	N/A	Yes	0.343961	0.0151774	Yes	6.50724	-4.21763	1.6767	-2.51543	0.0118888	0.0969735	protein_coding	intronic	0	0	0	0	0	0	0	0	0	0	0	0	0	0
wt_saf_neg_peak_24999	chr11	68240696	68240872	-	177	19	10	7	18	0	2	0	2	Yes	0.511448	0.296161	0.21035	0.244289	0	0.0620941	0	0.132218	N/A	No	0.33932	0.031047	Yes	6.69768	-3.18919	1.35513	-2.35342	0.0186015	0.129399	protein_coding	intronic	0	0	0	0	0	0	0	0	0	0	0	0	0	0
wt_saf_neg_peak_25000	chr11	68241379	68241472	-	94	10	13	2	11	0	0	0	0	Yes	0.269183	0.38501	0.0601001	0.149288	0	0	0	0	N/A	No	0.238098	0	Yes	4.32382	-5.11804	1.85435	-2.76003	0.00577967	0.0592551	protein_coding	intronic	0	0	0	0	0	0	0	0	0	0	0	1	0	0
wt_saf_neg_peak_25001	chr11	68242388	68242654	-	267	14	9	6	2	0	1	0	0	Yes	0.376857	0.266545	0.1803	0.0271433	0	0.031047	0	0	N/A	Yes	0.274567	0.0155235	Yes	5.26878	-3.88987	1.73009	-2.24837	0.0245526	0.155635	protein_coding	intronic	0	0	0	0	0	0	0	0	0	0	0	0	0	0
wt_saf_neg_peak_25002	chr11	68243008	68243426	-	419	25	13	13	36	2	4	0	2	Yes	0.672958	0.38501	0.390651	0.488579	0.0607097	0.124188	0	0.132218	N/A	No	0.482873	0.0924489	Yes	10.2518	-2.12096	0.92084	-2.30329	0.0212626	0.141094	protein_coding	intronic	1	0	0	0	0	0	0	0	0	0	0	1	0	0
wt_saf_neg_peak_25003	chr11	68243929	68244549	-	621	22	22	15	35	3	5	0	0	Yes	0.592203	0.651555	0.450751	0.475007	0.0910646	0.155235	0	0	N/A	No	0.564836	0.12315	Yes	12.1606	-1.92501	0.815112	-2.36166	0.0181935	0.127593	protein_coding	intronic	0	0	0	0	0	0	0	0	0	0	0	0	0	0
wt_saf_neg_peak_25005	chr11	68245772	68246161	-	390	43	22	10	27	6	2	0	1	Yes	1.15749	0.651555	0.300501	0.366434	0.182129	0.0620941	0	0.0661091	N/A	No	0.703181	0.122112	Yes	14.6791	-2.26444	0.845593	-2.67793	0.00740785	0.0703105	protein_coding	intronic	1	0	0	2	0	0	0	0	0	0	0	0	0	0
wt_saf_neg_peak_25006	chr11	68246973	68247186	-	214	25	8	7	11	1	0	0	0	Yes	0.672958	0.236929	0.21035	0.149288	0.0303549	0	0	0	N/A	No	0.373413	0.0151774	Yes	7.09751	-4.35032	1.69165	-2.57164	0.0101219	0.087025	protein_coding	intronic	0	0	0	1	0	0	0	0	0	0	0	1	0	0
wt_saf_neg_peak_25008	chr11	68252187	68252712	-	526	40	29	21	57	6	0	0	3	Yes	1.07673	0.858867	0.631051	0.773583	0.182129	0	0	0.198327	N/A	No	0.855551	0.0910646	Yes	17.0005	-2.9648	0.843361	-3.51546	0.000438988	0.0083772	protein_coding	intronic	0	1	0	0	0	0	0	0	0	1	0	1	0	0
wt_saf_neg_peak_25010	chr11	68253956	68254157	-	202	11	14	12	27	2	2	0	3	Yes	0.296102	0.414626	0.360601	0.366434	0.0607097	0.0620941	0	0.198327	N/A	No	0.357109	0.0614019	Yes	7.44213	-2.26702	1.07357	-2.11166	0.0347157	0.196237	protein_coding	intronic	0	0	0	0	0	0	0	0	0	0	0	0	0	0
wt_saf_neg_peak_25021	chr11	68280775	68280874	-	100	15	12	8	12	3	1	0	1	Yes	0.403775	0.355393	0.240401	0.16286	0.0910646	0.031047	0	0.0661091	N/A	Yes	0.33319	0.0610558	Yes	6.99412	-2.18126	1.1066	-1.97113	0.0487086	0.243738	protein_coding	intronic	0	0	0	0	0	0	0	0	0	0	0	0	0	0
wt_saf_neg_peak_25023	chr11	68286373	68286816	-	444	24	35	23	64	5	9	0	4	Yes	0.64604	1.03656	0.691151	0.868585	0.151774	0.279423	0	0.264436	N/A	No	0.791252	0.215599	Yes	17.647	-1.59777	0.669229	-2.38748	0.0169643	0.122248	protein_coding	intronic	0	0	0	0	0	0	0	0	0	0	0	0	0	0
wt_saf_neg_peak_25024	chr11	68288323	68288404	-	82	14	13	11	4	0	1	0	0	Yes	0.376857	0.38501	0.330551	0.0542865	0	0.031047	0	0	N/A	Yes	0.364139	0.0155235	Yes	6.90707	-4.29469	1.6575	-2.59107	0.00956773	0.0838153	protein_coding	intronic	0	0	0	0	0	0	0	0	0	0	0	0	0	0
wt_saf_neg_peak_25027	chr11	68299666	68299937	-	272	48	30	26	63	9	12	0	1	Yes	1.29208	0.888483	0.781302	0.855013	0.273194	0.372564	0	0.0661091	N/A	No	0.987288	0.322879	Yes	22.9032	-1.34601	0.580048	-2.32052	0.0203129	0.13689	protein_coding	intronic	0	0	0	1	0	0	0	0	0	0	0	0	0	0
wt_saf_neg_peak_25028	chr11	68300386	68300784	-	399	33	41	29	90	15	10	0	3	Yes	0.888305	1.21426	0.871452	1.22145	0.455323	0.31047	0	0.198327	N/A	No	0.991339	0.382897	Yes	23.7476	-1.10075	0.549478	-2.00326	0.0451491	0.232249	protein_coding	intronic	0	0	0	0	0	0	0	0	0	0	0	1	0	0
wt_saf_neg_peak_25032	chr11	68310483	68310639	-	157	24	7	27	19	0	0	0	0	Yes	0.64604	0.207313	0.811352	0.257861	0	0	0	0	N/A	Yes	0.554902	0	Yes	10.2776	-6.36199	1.6432	-3.87171	0.000108075	0.00264754	protein_coding	intronic	0	0	0	0	0	0	0	0	0	0	0	0	0	0
wt_saf_neg_peak_25033	chr11	68312473	68313706	-	1234	121	76	84	69	30	23	0	0	Yes	3.25712	2.25082	2.52421	0.936443	0.910646	0.714082	0	0	N/A	Yes	2.67738	0.812364	Yes	61.1638	-1.45707	0.374929	-3.88626	0.000101802	0.00251876	protein_coding	intronic	0	0	0	0	0	0	0	0	0	0	0	0	0	0
wt_saf_neg_peak_25034	chr11	68315416	68315629	-	214	21	30	16	22	9	3	0	1	Yes	0.565285	0.888483	0.480801	0.298576	0.273194	0.0931411	0	0.0661091	N/A	No	0.644857	0.183167	Yes	14.4349	-1.54364	0.746369	-2.0682	0.0386208	0.21025	protein_coding	intronic	0	0	0	0	0	0	0	0	0	0	0	1	0	0
wt_saf_neg_peak_25036	chr11	68317886	68318259	-	374	32	37	39	44	7	8	0	2	Yes	0.861387	1.0958	1.17195	0.597152	0.212484	0.248376	0	0.132218	N/A	No	1.04305	0.23043	Yes	22.5286	-1.90685	0.603193	-3.16127	0.00157085	0.0227008	protein_coding	intronic	0	0	0	2	0	0	0	0	0	0	0	0	0	0
wt_saf_neg_peak_25038	chr11	68321132	68321271	-	140	28	14	23	15	1	3	0	2	Yes	0.753713	0.414626	0.691151	0.203575	0.0303549	0.0931411	0	0.132218	N/A	Yes	0.61983	0.061748	Yes	12.3451	-3.06679	0.973821	-3.14924	0.00163697	0.0234107	protein_coding	intronic	0	0	0	0	0	0	0	0	0	0	0	0	0	0
wt_saf_neg_peak_25039	chr11	68321746	68321940	-	195	20	30	23	9	4	3	0	0	Yes	0.538367	0.888483	0.691151	0.122145	0.121419	0.0931411	0	0	N/A	Yes	0.706001	0.10728	Yes	14.4821	-2.44342	0.802789	-3.04367	0.00233713	0.0306088	protein_coding	intronic	0	0	0	0	0	0	0	0	0	0	0	0	0	0
wt_saf_neg_peak_25043	chr11	68324432	68324568	-	137	20	15	18	24	5	4	0	0	Yes	0.538367	0.444242	0.540901	0.325719	0.151774	0.124188	0	0	N/A	No	0.507837	0.137981	Yes	11.3635	-1.61416	0.808496	-1.9965	0.0458792	0.234581	protein_coding	intronic	0	0	0	1	0	0	0	0	0	0	0	0	0	0
wt_saf_neg_peak_25055	chr11	68344195	68344416	-	222	27	36	28	73	6	5	0	2	Yes	0.726795	1.06618	0.841402	0.990729	0.182129	0.155235	0	0.132218	N/A	No	0.878126	0.168682	Yes	18.5428	-2.10653	0.677768	-3.10805	0.00188328	0.0260574	protein_coding	intronic	0	0	0	0	0	0	0	0	0	0	0	1	0	0
wt_saf_neg_peak_25059	chr11	68354008	68354301	-	294	73	52	67	85	31	20	0	2	Yes	1.96504	1.54004	2.01335	1.15359	0.941	0.620941	0	0.132218	N/A	No	1.83948	0.780971	Yes	45.2918	-0.972752	0.410895	-2.3674	0.0179136	0.12641	protein_coding	intronic	0	0	0	0	0	0	0	0	0	0	0	0	0	0
wt_saf_neg_peak_25060	chr11	68354771	68354929	-	159	86	41	60	49	16	10	0	3	Yes	2.31498	1.21426	1.803	0.66501	0.485678	0.31047	0	0.198327	N/A	Yes	1.77741	0.398074	Yes	38.5916	-1.89895	0.497235	-3.81901	0.000133989	0.00317183	protein_coding	intronic	0	0	0	0	0	0	0	0	0	0	0	0	0	0
wt_saf_neg_peak_25100	chr11	68806598	68806672	-	75	5	15	9	0	0	0	0	4	Yes	0.134592	0.444242	0.270451	0	0	0	0	0.264436	N/A	Yes	0.283095	0	Yes	5.1522	-5.36523	1.77272	-3.02656	0.00247355	0.0319581	other	intronic	0	0	0	0	0	0	0	0	0	0	0	0	0	0
wt_saf_neg_peak_25122	chr11	68900408	68900631	-	224	1	6	12	0	0	0	0	1	Yes	0.0269183	0.177697	0.360601	0	0	0	0	0.0661091	N/A	Yes	0.188405	0	Yes	3.46578	-4.78827	1.97273	-2.42723	0.0152145	0.113789	other	intronic	0	0	0	0	0	0	0	0	0	0	1	1	0	0
wt_saf_neg_peak_25168	chr11	69298786	69299074	-	289	16	18	19	6	6	3	0	3	Yes	0.430693	0.53309	0.570951	0.0814298	0.182129	0.0931411	0	0.198327	N/A	Yes	0.511578	0.137635	Yes	11.3973	-1.62529	0.814424	-1.99564	0.0459736	0.234922	other	intronic	0	0	0	0	0	0	0	0	0	0	1	2	0	0
wt_saf_neg_peak_25186	chr11	69347762	69347864	-	103	24	15	14	42	0	5	0	0	Yes	0.64604	0.444242	0.420701	0.570009	0	0.155235	0	0	N/A	No	0.503661	0.0776176	Yes	10.4189	-2.42936	0.986757	-2.46196	0.0138179	0.106858	protein_coding	exonic	0	0	0	0	0	0	0	0	0	0	0	0	0	0
wt_saf_neg_peak_25319	chr11	69789396	69789476	-	81	5	7	4	5	0	0	0	0	Yes	0.134592	0.207313	0.1202	0.0678582	0	0	0	0	N/A	No	0.154035	0	Yes	2.811	-4.49357	1.9664	-2.28517	0.0223027	NA	protein_coding	intronic	0	0	0	0	0	0	0	0	0	0	0	1	0	0
wt_saf_neg_peak_25338	chr11	69876385	69876516	-	132	4	10	6	5	0	0	0	2	Yes	0.107673	0.296161	0.1803	0.0678582	0	0	0	0.132218	N/A	Yes	0.194712	0	Yes	3.54581	-4.82654	1.88517	-2.56026	0.0104593	0.0889248	protein_coding	UTR3	0	0	0	0	0	0	0	0	0	0	0	0	0	0
wt_saf_neg_peak_25359	chr11	69947365	69947462	-	98	8	5	2	0	0	0	0	0	Yes	0.215347	0.148081	0.0601001	0	0	0	0	0	N/A	Yes	0.141176	0	Yes	2.58495	-4.37697	2.02967	-2.15649	0.0310452	NA	protein_coding	intronic	0	0	0	0	0	0	0	0	0	0	0	0	0	0
wt_saf_neg_peak_25447	chr11	70887005	70887150	-	146	12	10	6	7	0	2	0	0	Yes	0.32302	0.296161	0.1803	0.0950014	0	0.0620941	0	0	N/A	Yes	0.266494	0.031047	Yes	5.34497	-2.83305	1.40862	-2.01123	0.044301	0.229483	other	intronic	0	0	0	0	0	0	0	0	0	0	0	0	0	0
wt_saf_neg_peak_25610	chr11	73188823	73188948	-	126	20	24	16	15	6	3	0	4	Yes	0.538367	0.710787	0.480801	0.203575	0.182129	0.0931411	0	0.264436	N/A	Yes	0.576651	0.137635	Yes	12.5565	-1.7953	0.792821	-2.26445	0.0235464	0.151249	protein_coding	intronic	0	0	0	0	0	0	0	0	0	0	0	0	0	0
wt_saf_neg_peak_25849	chr11	75616730	75617058	-	329	13	1	6	0	0	0	0	0	Yes	0.349938	0.0296161	0.1803	0	0	0	0	0	N/A	Yes	0.186618	0	Yes	3.46293	-4.79705	1.96712	-2.43862	0.0147434	0.111492	other	intronic	0	0	0	1	0	0	0	0	0	0	0	0	0	0
wt_saf_neg_peak_25932	chr11	76111189	76111355	-	167	4	6	11	2	0	0	0	4	Yes	0.107673	0.177697	0.330551	0.0271433	0	0	0	0.264436	N/A	Yes	0.205307	0	Yes	3.77827	-4.91476	1.87007	-2.62812	0.00858592	0.0778613	protein_coding	intronic	0	0	0	1	0	0	0	0	0	0	0	1	0	0
wt_saf_neg_peak_26037	chr11	76348203	76348374	-	172	28	31	28	34	12	6	0	1	Yes	0.753713	0.9181	0.841402	0.461436	0.364258	0.186282	0	0.0661091	N/A	No	0.837738	0.27527	Yes	19.3792	-1.33713	0.617038	-2.16701	0.0302344	0.179022	protein_coding	intronic	0	0	0	1	0	0	0	0	0	0	0	1	0	0
wt_saf_neg_peak_26220	chr11	76994136	76994431	-	296	14	23	11	8	6	0	0	1	Yes	0.376857	0.681171	0.330551	0.108573	0.182129	0	0	0.0661091	N/A	Yes	0.462859	0.0910646	Yes	9.74583	-2.07368	0.993257	-2.08776	0.0368199	0.203906	other	intronic	0	0	1	0	0	0	0	0	0	0	2	0	0	0
wt_saf_neg_peak_26305	chr11	77666133	77666653	-	521	12	3	6	0	0	0	0	3	Yes	0.32302	0.0888483	0.1803	0	0	0	0	0.198327	N/A	Yes	0.19739	0	Yes	3.64787	-4.87184	1.89021	-2.5774	0.00995454	0.0860335	other	intronic	0	0	0	1	0	0	0	0	0	0	0	0	0	0
wt_saf_neg_peak_26415	chr11	78500625	78500954	-	330	5	1	8	2	0	0	0	0	Yes	0.134592	0.0296161	0.240401	0.0271433	0	0	0	0	N/A	Yes	0.134869	0	Yes	2.50492	-4.32311	2.08665	-2.07179	0.0382846	NA	other	intronic	0	0	0	0	0	0	0	0	0	0	0	0	0	0
wt_saf_neg_peak_26432	chr11	78554347	78554734	-	388	6	3	6	6	0	0	0	0	Yes	0.16151	0.0888483	0.1803	0.0814298	0	0	0	0	N/A	No	0.143553	0	Yes	2.64875	-4.40644	1.99999	-2.20323	0.0275785	NA	other	intronic	0	0	0	0	0	0	0	0	0	0	0	3	0	0
wt_saf_neg_peak_26647	chr11	80034130	80034449	-	320	11	4	7	4	0	0	0	1	Yes	0.296102	0.118464	0.21035	0.0542865	0	0	0	0.0661091	N/A	Yes	0.208306	0	Yes	3.84415	-4.94622	1.85541	-2.66584	0.00767968	0.0721351	other	intronic	0	0	0	0	0	0	0	0	0	0	0	0	0	0
wt_saf_neg_peak_26732	chr11	80565078	80565452	-	375	15	10	16	0	0	0	0	2	Yes	0.403775	0.296161	0.480801	0	0	0	0	0.132218	N/A	Yes	0.393579	0	Yes	7.24827	-5.85853	1.67054	-3.50697	0.000453234	0.00859118	protein_coding	intronic	0	0	0	0	0	0	0	0	0	0	0	0	0	0
wt_saf_neg_peak_26797	chr11	81016756	81017242	-	487	10	7	7	16	0	0	0	1	Yes	0.269183	0.207313	0.21035	0.217146	0	0	0	0.0661091	N/A	No	0.228949	0	Yes	4.20482	-5.0751	1.80846	-2.80631	0.00501117	0.0535375	protein_coding	intronic	0	1	0	0	0	0	0	0	0	0	0	0	0	0
wt_saf_neg_peak_26815	chr11	81086135	81086603	-	469	11	15	2	12	0	0	0	1	Yes	0.296102	0.444242	0.0601001	0.16286	0	0	0	0.0661091	N/A	No	0.266815	0	Yes	4.8418	-5.2812	1.82691	-2.89078	0.00384285	0.0443281	protein_coding	intronic	0	0	0	1	0	0	0	0	0	0	0	1	0	0
wt_saf_neg_peak_26818	chr11	81100385	81100927	-	543	10	8	5	3	0	0	0	0	Yes	0.269183	0.236929	0.15025	0.0407149	0	0	0	0	N/A	Yes	0.218788	0	Yes	4.0064	-5.00676	1.82949	-2.7367	0.0062058	0.0621265	protein_coding	intronic	0	0	0	0	0	0	0	0	0	0	0	0	0	0
wt_saf_neg_peak_26918	chr11	82982467	82982542	-	76	6	10	6	3	0	0	0	4	Yes	0.16151	0.296161	0.1803	0.0407149	0	0	0	0.264436	N/A	Yes	0.212657	0	Yes	3.87885	-4.95729	1.84141	-2.69211	0.0071001	0.0682733	protein_coding	exonic	0	0	0	0	0	0	0	0	0	0	0	0	0	0
wt_saf_neg_peak_26959	chr11	83941649	83941993	-	345	13	9	10	2	2	0	0	0	Yes	0.349938	0.266545	0.300501	0.0271433	0.0607097	0	0	0	N/A	Yes	0.305661	0.0303549	Yes	6.05538	-3.06393	1.36871	-2.23856	0.0251849	0.158384	other	intronic	0	0	1	0	0	0	0	0	0	0	0	0	0	0
wt_saf_neg_peak_26996	chr11	84238070	84238308	-	239	32	57	22	31	4	5	0	2	Yes	0.861387	1.68812	0.661101	0.420721	0.121419	0.155235	0	0.132218	N/A	Yes	1.0702	0.138327	Yes	21.505	-2.67088	0.719631	-3.71146	0.000206069	0.00451728	other	intronic	0	0	1	0	0	0	0	0	0	0	0	1	0	0
wt_saf_neg_peak_27072	chr11	84879529	84879770	-	242	12	11	10	13	2	1	0	0	Yes	0.32302	0.325777	0.300501	0.176431	0.0607097	0.031047	0	0	N/A	No	0.316433	0.0458784	Yes	6.47382	-2.51693	1.19152	-2.11237	0.0346545	0.196019	protein_coding	UTR5	0	0	0	0	0	0	0	0	0	0	0	0	0	0
wt_saf_neg_peak_27190	chr11	85292070	85292156	-	87	10	8	12	20	0	1	0	1	Yes	0.269183	0.236929	0.360601	0.271433	0	0.031047	0	0.0661091	N/A	No	0.288904	0.0155235	Yes	5.54942	-3.96332	1.71071	-2.31677	0.0205162	0.137798	other	intronic	0	0	0	1	0	0	0	0	0	0	0	0	0	0
wt_saf_neg_peak_27530	chr11	87224356	87224501	-	146	3	6	6	6	0	0	0	3	Yes	0.080755	0.177697	0.1803	0.0814298	0	0	0	0.198327	N/A	Yes	0.146251	0	Yes	2.67638	-4.41912	1.99771	-2.21209	0.0269606	NA	other	intronic	0	0	0	0	0	0	0	0	0	0	0	0	0	0
wt_saf_neg_peak_27542	chr11	87269822	87270117	-	296	5	15	3	0	0	0	0	1	Yes	0.134592	0.444242	0.0901502	0	0	0	0	0.0661091	N/A	Yes	0.222995	0	Yes	4.02976	-5.01382	1.87682	-2.67144	0.00755258	0.0712897	protein_coding	intronic	0	0	0	0	0	0	0	0	0	0	0	2	0	0
wt_saf_neg_peak_27544	chr11	87272961	87273680	-	720	29	17	28	30	7	6	0	0	Yes	0.780632	0.503474	0.841402	0.407149	0.212484	0.186282	0	0	N/A	No	0.708502	0.199383	Yes	15.9897	-1.56645	0.695026	-2.2538	0.0242091	0.154188	protein_coding	intronic	0	2	0	0	0	0	0	0	0	0	0	0	0	0
wt_saf_neg_peak_27546	chr11	87275035	87275535	-	501	21	4	16	1	3	0	0	0	Yes	0.565285	0.118464	0.480801	0.0135716	0.0910646	0	0	0	N/A	Yes	0.388184	0.0455323	Yes	7.8505	-2.83983	1.23362	-2.30204	0.021333	0.141404	protein_coding	intronic	1	0	0	0	0	0	0	0	0	0	0	1	0	0
wt_saf_neg_peak_27548	chr11	87283673	87284013	-	341	5	10	2	0	0	0	0	3	Yes	0.134592	0.296161	0.0601001	0	0	0	0	0.198327	N/A	Yes	0.163618	0	Yes	2.96404	-4.57179	1.9829	-2.30561	0.0211324	0.140549	protein_coding	intronic	0	0	0	0	0	0	0	0	0	0	0	0	0	0
wt_saf_neg_peak_27575	chr11	87346695	87346788	-	94	6	4	5	4	0	0	0	0	Yes	0.16151	0.118464	0.15025	0.0542865	0	0	0	0	N/A	Yes	0.143408	0	Yes	2.63741	-4.40131	1.99225	-2.20921	0.02716	NA	protein_coding	intronic	0	0	0	0	0	0	0	0	0	0	0	1	0	0
wt_saf_neg_peak_27657	chr11	88037014	88037125	-	112	6	5	3	8	0	0	0	1	Yes	0.16151	0.148081	0.0901502	0.108573	0	0	0	0.0661091	N/A	No	0.133247	0	Yes	2.43899	-4.29073	2.03435	-2.10914	0.0349324	NA	lncRNA	intronic	0	0	0	0	0	0	0	0	0	0	0	0	0	0
wt_saf_neg_peak_27669	chr11	88185255	88185548	-	294	13	17	8	3	0	1	0	3	Yes	0.349938	0.503474	0.240401	0.0407149	0	0.031047	0	0.198327	N/A	Yes	0.364604	0.0155235	Yes	6.88224	-4.29008	1.66788	-2.57218	0.0101062	0.0869363	other	intronic	0	0	2	0	0	0	0	0	0	0	0	2	0	0
wt_saf_neg_peak_27679	chr11	88288872	88289292	-	421	14	7	7	7	1	1	0	4	Yes	0.376857	0.207313	0.21035	0.0950014	0.0303549	0.031047	0	0.264436	N/A	Yes	0.26484	0.0307009	Yes	5.32356	-2.84684	1.39465	-2.04126	0.0412251	0.219097	other	intronic	0	0	0	0	0	0	0	0	0	0	0	0	0	0
wt_saf_neg_peak_27780	chr11	88484099	88484207	-	109	19	15	21	11	1	4	0	4	Yes	0.511448	0.444242	0.631051	0.149288	0.0303549	0.124188	0	0.264436	N/A	Yes	0.528914	0.0772715	Yes	10.8815	-2.50784	0.941684	-2.66314	0.00774148	0.0724838	protein_coding	intronic	0	0	0	1	0	0	0	0	0	0	0	0	0	0
wt_saf_neg_peak_27978	chr11	89067272	89067725	-	454	15	11	7	1	0	1	0	2	Yes	0.403775	0.325777	0.21035	0.0135716	0	0.031047	0	0.132218	N/A	Yes	0.313301	0.0155235	Yes	5.97383	-4.07904	1.69717	-2.40344	0.0162416	0.11877	other	intronic	0	0	0	0	0	0	0	0	0	0	0	0	0	0
wt_saf_neg_peak_27994	chr11	90476707	90476982	-	276	14	14	11	7	1	4	0	2	Yes	0.376857	0.414626	0.330551	0.0950014	0.0303549	0.124188	0	0.132218	N/A	Yes	0.374011	0.0772715	Yes	8.00246	-2.00166	1.018	-1.96626	0.0492689	0.245631	protein_coding	UTR3	0	0	0	0	0	0	0	0	0	0	0	0	0	0
wt_saf_neg_peak_28030	chr11	90589338	90589456	-	119	6	3	8	3	0	0	0	0	Yes	0.16151	0.0888483	0.240401	0.0407149	0	0	0	0	N/A	Yes	0.163586	0	Yes	3.0229	-4.59546	1.95046	-2.35609	0.0184686	0.128769	protein_coding	intronic	0	0	0	1	0	0	0	0	0	0	0	0	0	0
wt_saf_neg_peak_28050	chr11	90626268	90626356	-	89	6	5	4	4	0	0	0	0	Yes	0.16151	0.148081	0.1202	0.0542865	0	0	0	0	N/A	Yes	0.143264	0	Yes	2.62606	-4.39617	1.99322	-2.20557	0.0274143	NA	protein_coding	intronic	0	0	0	1	0	0	0	0	0	0	0	0	0	0
wt_saf_neg_peak_28201	chr11	94459731	94459840	-	110	11	8	1	24	0	0	0	0	Yes	0.296102	0.236929	0.0300501	0.325719	0	0	0	0	N/A	No	0.187694	0	Yes	3.42462	-4.78358	1.95878	-2.44212	0.0146012	0.110896	protein_coding	exonic	0	0	0	0	0	0	0	0	0	0	0	0	0	0
wt_saf_neg_peak_28293	chr11	95222304	95223030	-	727	11	14	16	12	1	2	0	4	Yes	0.296102	0.414626	0.480801	0.16286	0.0303549	0.0620941	0	0.264436	N/A	Yes	0.397176	0.0462245	Yes	7.97127	-2.83206	1.1417	-2.48055	0.0131179	0.103248	other	intronic	0	0	0	0	0	0	0	0	0	0	0	1	0	0
wt_saf_neg_peak_28461	chr11	96943012	96943086	-	75	2	6	5	1	0	0	0	0	Yes	0.0538367	0.177697	0.15025	0.0135716	0	0	0	0	N/A	Yes	0.127261	0	Yes	2.32278	-4.21446	2.0794	-2.02677	0.0426857	NA	protein_coding	intronic	0	0	0	0	0	0	0	0	0	0	0	1	0	0
wt_saf_neg_peak_28849	chr11	98801998	98802344	-	347	7	5	6	3	0	0	0	4	Yes	0.188428	0.148081	0.1803	0.0407149	0	0	0	0.264436	N/A	Yes	0.17227	0	Yes	3.16673	-4.66505	1.91148	-2.44055	0.014665	0.11116	lncRNA	intronic	0	0	0	0	0	0	0	0	0	0	0	0	0	0
wt_saf_neg_peak_28923	chr11	100276744	100277689	-	946	23	25	8	3	2	6	0	3	Yes	0.619122	0.740403	0.240401	0.0407149	0.0607097	0.186282	0	0.198327	N/A	Yes	0.533308	0.123496	Yes	11.5591	-1.83168	0.878098	-2.08597	0.0369816	0.204452	other	intronic	0	0	0	2	0	0	0	0	0	0	1	0	0	0
wt_saf_neg_peak_29337	chr11	102420887	102421177	-	291	3	11	6	0	0	0	0	2	Yes	0.080755	0.325777	0.1803	0	0	0	0	0.132218	N/A	Yes	0.195611	0	Yes	3.55502	-4.8298	1.90029	-2.5416	0.0110345	0.0921863	other	intronic	0	0	0	1	0	0	0	0	0	0	0	0	0	0
wt_saf_neg_peak_29406	chr11	102783937	102784661	-	725	21	15	14	26	7	0	0	4	Yes	0.565285	0.444242	0.420701	0.352863	0.212484	0	0	0.264436	N/A	No	0.476743	0.106242	Yes	10.286	-1.90684	0.946015	-2.01565	0.0438362	0.228085	other	intronic	0	0	0	0	0	0	0	0	0	0	2	2	0	0
wt_saf_neg_peak_29407	chr11	102785414	102785586	-	173	6	6	2	0	0	0	0	0	Yes	0.16151	0.177697	0.0601001	0	0	0	0	0	N/A	Yes	0.133102	0	Yes	2.42764	-4.28507	2.0532	-2.08703	0.0368858	NA	other	intronic	0	0	0	0	0	0	0	0	0	0	0	0	0	0
wt_saf_neg_peak_29476	chr11	102960947	102961259	-	313	9	7	6	3	0	0	0	4	Yes	0.242265	0.207313	0.1803	0.0407149	0	0	0	0.264436	N/A	Yes	0.209959	0	Yes	3.85123	-4.9486	1.83766	-2.69288	0.00708371	0.0681762	lncRNA	intronic	0	0	0	0	0	0	0	0	0	0	0	2	0	0
wt_saf_neg_peak_29514	chr11	103109356	103109661	-	306	7	2	5	10	0	0	0	0	Yes	0.188428	0.0592322	0.15025	0.135716	0	0	0	0	N/A	No	0.132637	0	Yes	2.45247	-4.29718	2.05295	-2.09317	0.0363337	NA	other	intronic	0	0	0	0	0	0	0	0	0	0	0	3	0	0
wt_saf_neg_peak_29531	chr11	103221891	103222022	-	132	8	3	6	1	0	0	0	2	Yes	0.215347	0.0888483	0.1803	0.0135716	0	0	0	0.132218	N/A	Yes	0.161498	0	Yes	2.98179	-4.57887	1.95294	-2.34461	0.0190472	0.1314	protein_coding	intronic	0	0	0	0	0	0	0	0	0	0	0	1	0	0
wt_saf_neg_peak_29532	chr11	103222893	103222986	-	94	9	6	5	1	0	0	0	3	Yes	0.242265	0.177697	0.15025	0.0135716	0	0	0	0.198327	N/A	Yes	0.190071	0	Yes	3.48842	-4.8067	1.8771	-2.5607	0.0104462	0.0888488	protein_coding	intronic	0	0	0	0	0	0	0	0	0	0	0	1	0	0
wt_saf_neg_peak_29545	chr11	103256968	103257055	-	88	7	1	6	0	0	0	0	0	Yes	0.188428	0.0296161	0.1803	0	0	0	0	0	N/A	Yes	0.132782	0	Yes	2.46381	-4.30274	2.08707	-2.06162	0.0392441	NA	protein_coding	intronic	0	0	0	0	0	0	0	0	0	0	0	0	0	0
wt_saf_neg_peak_29552	chr11	103265731	103265877	-	147	8	5	1	4	0	0	0	2	Yes	0.215347	0.148081	0.0300501	0.0542865	0	0	0	0.132218	N/A	Yes	0.131159	0	Yes	2.39788	-4.26971	2.0988	-2.03436	0.0419155	NA	protein_coding	intronic	0	0	0	0	0	0	0	0	0	0	0	1	0	0
wt_saf_neg_peak_29554	chr11	103329064	103329429	-	366	9	12	12	13	0	0	0	1	Yes	0.242265	0.355393	0.360601	0.176431	0	0	0	0.0661091	N/A	Yes	0.31942	0	Yes	5.85232	-5.54923	1.71624	-3.23337	0.00122339	0.0187484	other	intronic	0	1	0	0	0	0	0	0	0	0	0	0	0	0
wt_saf_neg_peak_29804	chr11	105169247	105169355	-	109	7	8	14	2	0	0	0	0	Yes	0.188428	0.236929	0.420701	0.0271433	0	0	0	0	N/A	Yes	0.282019	0	Yes	5.19051	-5.37402	1.76008	-3.05328	0.00226357	0.0298966	other	intronic	0	0	0	1	0	0	0	0	0	0	0	1	0	0
wt_saf_neg_peak_29814	chr11	105462634	105462987	-	354	6	5	2	0	0	0	0	2	Yes	0.16151	0.148081	0.0601001	0	0	0	0	0.132218	N/A	Yes	0.12323	0	Yes	2.25191	-4.17691	2.08823	-2.00022	0.0454764	NA	other	intronic	0	0	0	0	0	0	0	0	0	0	0	0	0	0
wt_saf_neg_peak_29882	chr11	106388147	106388426	-	280	11	11	4	0	0	0	0	0	Yes	0.296102	0.325777	0.1202	0	0	0	0	0	N/A	Yes	0.24736	0	Yes	4.51303	-5.1793	1.80488	-2.86961	0.00410977	0.0464644	other	intronic	0	1	0	0	0	0	0	0	0	0	0	1	0	0
wt_saf_neg_peak_29884	chr11	106393860	106393944	-	85	19	2	8	9	0	0	0	0	Yes	0.511448	0.0592322	0.240401	0.122145	0	0	0	0	N/A	No	0.27036	0	Yes	5.01193	-5.3307	1.83249	-2.909	0.00362591	0.04251	other	intronic	0	0	0	0	0	0	0	0	0	0	0	0	0	0
wt_saf_neg_peak_29896	chr11	106415849	106416653	-	805	18	28	20	12	1	8	0	4	Yes	0.48453	0.829251	0.601001	0.16286	0.0303549	0.248376	0	0.264436	N/A	Yes	0.638261	0.139366	Yes	13.7464	-1.91371	0.816322	-2.34431	0.0190622	0.131467	protein_coding	intronic	0	0	0	1	0	0	0	0	0	0	0	2	0	0
wt_saf_neg_peak_30343	chr11	108027693	108028166	-	474	15	6	3	0	0	0	0	0	Yes	0.403775	0.177697	0.0901502	0	0	0	0	0	N/A	Yes	0.223874	0	Yes	4.11339	-5.04798	1.86004	-2.71391	0.00664934	0.065283	protein_coding	intronic	0	1	0	0	0	0	0	0	0	0	0	0	0	0
wt_saf_neg_peak_30347	chr11	108079656	108079920	-	265	5	5	4	0	0	0	0	0	Yes	0.134592	0.148081	0.1202	0	0	0	0	0	N/A	Yes	0.134291	0	Yes	2.45954	-4.30084	2.02343	-2.12552	0.0335435	NA	protein_coding	intronic	0	0	0	0	0	0	0	0	0	0	0	0	0	0
wt_saf_neg_peak_30370	chr11	108190472	108190712	-	241	9	3	9	6	0	0	0	0	Yes	0.242265	0.0888483	0.270451	0.0814298	0	0	0	0	N/A	Yes	0.200521	0	Yes	3.70953	-4.89229	1.87777	-2.60537	0.00917741	0.0814409	protein_coding	intronic	0	2	0	0	0	0	0	0	0	0	0	0	0	0
wt_saf_neg_peak_30377	chr11	108232596	108232887	-	292	7	16	5	1	0	0	0	3	Yes	0.188428	0.473858	0.15025	0.0135716	0	0	0	0.198327	N/A	Yes	0.270846	0	Yes	4.91267	-5.29933	1.79026	-2.96009	0.00307549	0.0376994	protein_coding	intronic	0	0	0	0	0	0	0	0	0	0	0	0	0	0
wt_saf_neg_peak_30412	chr11	108335251	108335461	-	211	5	13	6	0	1	0	0	0	Yes	0.134592	0.38501	0.1803	0	0.0303549	0	0	0	N/A	Yes	0.233301	0.0151774	Yes	4.45868	-3.64742	1.78905	-2.03875	0.0414749	0.219936	protein_coding	intronic	0	0	0	0	0	0	0	0	0	0	0	0	0	0
wt_saf_neg_peak_30431	chr11	109242418	109242557	-	140	6	6	5	0	0	0	0	0	Yes	0.16151	0.177697	0.15025	0	0	0	0	0	N/A	Yes	0.163152	0	Yes	2.98886	-4.58186	1.93386	-2.36928	0.0178227	0.126016	protein_coding	intronic	0	0	0	1	0	0	0	0	0	0	0	0	0	0
wt_saf_neg_peak_30453	chr11	109353275	109353409	-	135	10	6	3	0	0	0	0	1	Yes	0.269183	0.177697	0.0901502	0	0	0	0	0.0661091	N/A	Yes	0.17901	0	Yes	3.28079	-4.72042	1.91924	-2.45952	0.0139121	0.107376	lncRNA	exonic	0	0	0	0	0	0	0	0	0	0	0	0	0	0
wt_saf_neg_peak_30470	chr11	109571002	109571079	-	78	6	7	2	0	0	0	0	0	Yes	0.16151	0.207313	0.0601001	0	0	0	0	0	N/A	Yes	0.142974	0	Yes	2.60337	-4.38568	2.02374	-2.16711	0.0302263	NA	other	intronic	0	0	0	0	0	0	0	0	0	0	0	0	0	0
wt_saf_neg_peak_30870	chr11	115629316	115629495	-	180	10	9	16	15	1	2	0	3	Yes	0.269183	0.266545	0.480801	0.203575	0.0303549	0.0620941	0	0.198327	N/A	No	0.338843	0.0462245	Yes	6.9261	-2.60711	1.18668	-2.19698	0.0280222	0.170313	other	intronic	0	0	0	0	0	0	0	0	0	0	0	2	0	0
wt_saf_neg_peak_31071	chr11	116422826	116423128	-	303	5	15	7	0	0	0	0	1	Yes	0.134592	0.444242	0.21035	0	0	0	0	0.0661091	N/A	Yes	0.263061	0	Yes	4.77805	-5.25735	1.79656	-2.92635	0.00342965	0.0408382	other	intronic	0	0	0	1	0	0	0	0	0	0	0	0	0	0
wt_saf_neg_peak_31072	chr11	116423551	116424467	-	917	24	29	12	0	1	7	0	1	Yes	0.64604	0.858867	0.360601	0	0.0303549	0.217329	0	0.0661091	N/A	Yes	0.621836	0.123842	Yes	13.1912	-2.04728	0.851486	-2.40436	0.0162007	0.118559	other	intronic	0	0	0	1	0	0	0	0	0	0	0	2	0	0
wt_saf_neg_peak_31190	chr11	117585177	117585377	-	201	12	1	6	17	0	0	0	0	Yes	0.32302	0.0296161	0.1803	0.230718	0	0	0	0	N/A	No	0.177646	0	Yes	3.29641	-4.7256	1.98155	-2.3848	0.0170883	0.122787	other	intronic	0	0	0	1	0	0	0	0	0	0	0	1	0	0
wt_saf_neg_peak_31334	chr11	118448213	118448629	-	417	9	11	8	0	0	0	0	1	Yes	0.242265	0.325777	0.240401	0	0	0	0	0.0661091	N/A	Yes	0.269481	0	Yes	4.92829	-5.30311	1.75974	-3.01358	0.00258182	0.0330083	lncRNA	exonic	0	0	0	0	0	0	0	0	0	0	0	0	0	0
wt_saf_neg_peak_31349	chr11	119010696	119010963	-	268	13	6	7	0	0	0	0	4	Yes	0.349938	0.177697	0.21035	0	0	0	0	0.264436	N/A	Yes	0.245995	0	Yes	4.52865	-5.18343	1.79542	-2.88702	0.00388907	0.0447078	other	intronic	0	0	0	0	0	0	0	0	0	0	1	1	0	0
wt_saf_neg_peak_31350	chr11	119012404	119013089	-	686	23	17	19	25	1	1	0	4	Yes	0.619122	0.503474	0.570951	0.339291	0.0303549	0.031047	0	0.264436	N/A	No	0.564516	0.0307009	Yes	10.8244	-3.93462	1.22027	-3.22438	0.00126245	0.0192056	other	intronic	0	2	0	0	0	0	0	0	0	0	1	1	0	0
wt_saf_neg_peak_31351	chr11	119020941	119021029	-	89	6	6	1	0	0	0	0	0	Yes	0.16151	0.177697	0.0300501	0	0	0	0	0	N/A	Yes	0.123086	0	Yes	2.24057	-4.17059	2.12625	-1.96148	0.0498234	NA	other	intronic	0	0	0	0	0	0	0	0	0	0	0	0	0	0
wt_saf_neg_peak_31370	chr11	119169743	119169873	-	131	8	12	3	4	0	1	0	0	Yes	0.215347	0.355393	0.0901502	0.0542865	0	0.031047	0	0	N/A	Yes	0.220297	0.0155235	Yes	4.23563	-3.55669	1.81126	-1.96365	0.0495704	0.246517	protein_coding	intronic	0	0	0	0	0	0	0	0	0	0	0	0	0	0
wt_saf_neg_peak_31415	chr11	119437284	119437521	-	238	5	3	7	0	0	0	0	4	Yes	0.134592	0.0888483	0.21035	0	0	0	0	0.264436	N/A	Yes	0.144597	0	Yes	2.66931	-4.4158	2.00073	-2.20709	0.0273078	NA	other	intronic	0	0	0	0	0	0	0	0	0	0	0	0	0	0
wt_saf_neg_peak_31429	chr11	119474434	119474508	-	75	20	5	8	1	3	0	0	1	Yes	0.538367	0.148081	0.240401	0.0135716	0.0910646	0	0	0.0661091	N/A	Yes	0.308949	0.0455323	Yes	6.36312	-2.51039	1.28059	-1.96034	0.0499556	0.247642	lncRNA	intronic	0	0	0	0	0	0	0	0	0	0	0	1	0	0
wt_saf_neg_peak_31456	chr11	119933706	119934101	-	396	12	23	12	10	4	3	0	2	Yes	0.32302	0.681171	0.360601	0.135716	0.121419	0.0931411	0	0.132218	N/A	Yes	0.45493	0.10728	Yes	9.86204	-1.80535	0.903307	-1.9986	0.0456513	0.233827	other	intronic	0	0	0	0	0	0	0	0	0	0	1	2	0	0
wt_saf_neg_peak_31511	chr11	120187334	120187588	-	255	5	12	5	5	0	0	0	0	Yes	0.134592	0.355393	0.15025	0.0678582	0	0	0	0	N/A	Yes	0.213412	0	Yes	3.87672	-4.95669	1.85733	-2.66871	0.00761422	0.0716908	lncRNA	exonic	0	0	0	0	0	0	0	0	0	0	0	0	0	0
wt_saf_neg_peak_31610	chr11	120722718	120723163	-	446	15	22	20	24	1	7	0	2	Yes	0.403775	0.651555	0.601001	0.325719	0.0303549	0.217329	0	0.132218	N/A	No	0.55211	0.123842	Yes	11.959	-1.87726	0.858552	-2.18654	0.0287759	0.173299	other	intronic	0	0	0	0	0	0	0	0	0	0	0	0	0	0
wt_saf_neg_peak_31792	chr12	3228434	3228582	-	149	7	0	7	8	0	0	0	0	Yes	0.188428	0	0.21035	0.108573	0	0	0	0	N/A	No	0.132926	0	Yes	2.47516	-4.3085	2.19641	-1.96161	0.0498078	NA	lncRNA	intronic	0	0	0	0	0	0	0	0	0	0	0	1	0	0
wt_saf_neg_peak_31884	chr12	4006487	4007428	-	942	28	35	15	9	0	8	0	1	Yes	0.753713	1.03656	0.450751	0.122145	0	0.248376	0	0.0661091	N/A	Yes	0.747009	0.124188	Yes	15.4872	-2.30558	0.847589	-2.72016	0.00652495	0.0644002	protein_coding	intronic	0	0	0	0	0	0	0	0	0	0	0	0	0	0
wt_saf_neg_peak_31885	chr12	4011929	4012179	-	251	4	5	6	0	0	0	0	2	Yes	0.107673	0.148081	0.1803	0	0	0	0	0.132218	N/A	Yes	0.145351	0	Yes	2.66717	-4.41486	1.9898	-2.21874	0.0265041	NA	protein_coding	intronic	0	0	0	0	0	0	0	0	0	0	0	0	0	0
wt_saf_neg_peak_32087	chr12	5160516	5160812	-	297	12	6	3	0	0	0	0	2	Yes	0.32302	0.177697	0.0901502	0	0	0	0	0.132218	N/A	Yes	0.196956	0	Yes	3.61383	-4.86054	1.89141	-2.5698	0.0101758	0.0873826	protein_coding	intronic	0	0	0	0	0	0	0	0	0	0	0	0	0	0
wt_saf_neg_peak_32230	chr12	12887512	12887733	-	222	11	20	5	9	0	1	0	2	Yes	0.296102	0.592322	0.15025	0.122145	0	0.031047	0	0.132218	N/A	Yes	0.346225	0.0155235	Yes	6.51517	-4.20805	1.70365	-2.47002	0.0135107	0.105315	other	intronic	0	0	0	2	0	0	0	0	0	0	0	0	0	0
wt_saf_neg_peak_32266	chr12	13433918	13434009	-	92	12	3	6	4	0	0	0	0	Yes	0.32302	0.0888483	0.1803	0.0542865	0	0	0	0	N/A	Yes	0.19739	0	Yes	3.64787	-4.87184	1.89021	-2.5774	0.00995454	0.0860335	other	intronic	0	0	0	1	0	0	0	0	0	0	0	0	0	0
wt_saf_neg_peak_32271	chr12	13984859	13985368	-	510	12	8	6	9	0	0	0	0	Yes	0.32302	0.236929	0.1803	0.122145	0	0	0	0	N/A	No	0.24675	0	Yes	4.52651	-5.18295	1.79058	-2.89457	0.00379684	0.0439194	other	intronic	0	1	0	0	0	0	0	0	0	0	1	0	0	0
wt_saf_neg_peak_32279	chr12	15377255	15377330	-	76	3	14	9	1	0	0	0	0	Yes	0.080755	0.414626	0.270451	0.0135716	0	0	0	0	N/A	Yes	0.255277	0	Yes	4.64343	-5.21424	1.82268	-2.86075	0.00422634	0.0473452	other	intronic	0	1	0	0	0	0	0	0	0	0	0	0	0	0
wt_saf_neg_peak_32290	chr12	15957005	15957422	-	418	10	15	1	7	0	0	0	2	Yes	0.269183	0.444242	0.0300501	0.0950014	0	0	0	0.132218	N/A	Yes	0.247825	0	Yes	4.48821	-5.1719	1.88198	-2.74812	0.00599374	0.0607149	other	intronic	0	1	0	0	0	0	0	0	0	0	0	0	0	0
wt_saf_neg_peak_32292	chr12	15971898	15972622	-	725	20	5	2	15	0	0	0	4	Yes	0.538367	0.148081	0.0601001	0.203575	0	0	0	0.264436	N/A	No	0.248849	0	Yes	4.58319	-5.20512	1.87225	-2.78015	0.00543346	0.0566357	other	intronic	0	0	0	1	0	0	0	0	0	0	0	0	0	0
wt_saf_neg_peak_32345	chr12	16682288	16682839	-	552	22	7	8	0	0	1	0	2	Yes	0.592203	0.207313	0.240401	0	0	0.031047	0	0.132218	N/A	Yes	0.346639	0.0155235	Yes	6.62363	-4.235	1.69663	-2.49613	0.0125557	0.100387	protein_coding	intronic	0	0	0	1	0	0	0	0	0	0	0	0	0	0
wt_saf_neg_peak_32361	chr12	16713284	16713700	-	417	6	16	9	11	0	0	0	1	Yes	0.16151	0.473858	0.270451	0.149288	0	0	0	0.0661091	N/A	No	0.301939	0	Yes	5.49445	-5.45852	1.75133	-3.11678	0.00182838	0.0254593	protein_coding	intronic	1	0	0	0	0	0	0	0	0	0	0	2	0	0
wt_saf_neg_peak_32362	chr12	16714528	16714938	-	411	7	8	9	4	0	0	0	0	Yes	0.188428	0.236929	0.270451	0.0542865	0	0	0	0	N/A	Yes	0.231936	0	Yes	4.25514	-5.08945	1.80518	-2.81937	0.00481187	0.0520319	protein_coding	intronic	0	0	0	0	0	0	0	0	0	0	0	0	0	0
wt_saf_neg_peak_32431	chr12	18522156	18522585	-	430	33	32	12	0	5	1	0	0	Yes	0.888305	0.947716	0.360601	0	0.151774	0.031047	0	0	N/A	Yes	0.732207	0.0914107	Yes	14.6927	-2.73005	0.874594	-3.1215	0.00179931	0.0251328	other	intronic	0	1	1	0	0	0	0	0	0	0	1	0	0	0
wt_saf_neg_peak_32434	chr12	19046907	19047559	-	653	34	25	17	0	3	3	0	2	Yes	0.915223	0.740403	0.510851	0	0.0910646	0.0931411	0	0.132218	N/A	Yes	0.722159	0.0921028	Yes	14.5931	-2.70357	0.835974	-3.23404	0.00122054	0.0187183	other	intronic	0	0	1	4	0	0	0	0	0	0	0	0	0	0
wt_saf_neg_peak_32450	chr12	19812606	19812752	-	147	10	5	5	7	0	0	0	0	Yes	0.269183	0.148081	0.15025	0.0950014	0	0	0	0	N/A	No	0.189171	0	Yes	3.47921	-4.80345	1.88425	-2.54927	0.010795	0.0908278	other	intronic	0	0	0	2	0	0	0	0	0	0	0	0	0	0
wt_saf_neg_peak_32554	chr12	21264491	21264565	-	75	6	10	2	8	0	0	0	0	Yes	0.16151	0.296161	0.0601001	0.108573	0	0	0	0	N/A	No	0.17259	0	Yes	3.13056	-4.65118	1.95805	-2.37541	0.0175294	0.124871	other	intronic	0	0	0	0	0	0	0	0	0	0	0	0	0	0
wt_saf_neg_peak_32555	chr12	21265632	21265789	-	158	10	6	20	1	0	2	0	3	Yes	0.269183	0.177697	0.601001	0.0135716	0	0.0620941	0	0.198327	N/A	Yes	0.349294	0.031047	Yes	6.92805	-3.23268	1.3675	-2.36394	0.0180817	0.127216	other	intronic	0	0	0	0	0	0	0	0	0	0	0	0	0	0
wt_saf_neg_peak_32556	chr12	21266887	21266963	-	77	9	12	2	11	0	0	0	0	Yes	0.242265	0.355393	0.0601001	0.149288	0	0	0	0	N/A	No	0.219253	0	Yes	3.98157	-4.99895	1.87711	-2.66312	0.00774207	0.0724838	other	intronic	0	0	0	0	0	0	0	0	0	0	0	0	0	0
wt_saf_neg_peak_32567	chr12	21314624	21314753	-	130	8	15	2	15	0	1	0	2	Yes	0.215347	0.444242	0.0601001	0.203575	0	0.031047	0	0.132218	N/A	No	0.239896	0.0155235	Yes	4.57574	-3.67441	1.81776	-2.02139	0.0432396	0.226163	other	intronic	0	0	0	0	0	0	0	0	0	0	0	0	0	0
wt_saf_neg_peak_32659	chr12	21839723	21840139	-	417	6	6	22	4	2	1	0	2	Yes	0.16151	0.177697	0.661101	0.0542865	0.0607097	0.031047	0	0.132218	N/A	Yes	0.333436	0.0458784	Yes	6.84095	-2.59892	1.25101	-2.07745	0.0377597	0.207203	other	intronic	0	0	0	0	0	0	0	0	0	0	0	2	0	0
wt_saf_neg_peak_32890	chr12	22951790	22952290	-	501	35	6	11	28	3	4	0	2	Yes	0.942142	0.177697	0.330551	0.380006	0.0910646	0.124188	0	0.132218	N/A	No	0.483463	0.107626	Yes	10.5319	-1.9136	0.963088	-1.98694	0.0469288	0.237944	other	intronic	0	0	0	0	0	0	0	0	0	0	0	0	0	0
wt_saf_neg_peak_32937	chr12	23131439	23131677	-	239	6	5	4	0	0	0	0	2	Yes	0.16151	0.148081	0.1202	0	0	0	0	0.132218	N/A	Yes	0.143264	0	Yes	2.62606	-4.39617	1.99322	-2.20557	0.0274143	NA	other	intronic	0	1	0	0	0	0	0	0	0	0	0	0	0	0
wt_saf_neg_peak_32971	chr12	23258648	23258746	-	99	1	8	5	15	0	0	0	0	Yes	0.0269183	0.236929	0.15025	0.203575	0	0	0	0	N/A	No	0.138033	0	Yes	2.50772	-4.32479	2.08639	-2.07286	0.0381855	NA	other	intronic	0	0	0	1	0	0	0	0	0	0	0	0	0	0
wt_saf_neg_peak_33084	chr12	24038785	24039018	-	234	13	15	3	4	1	1	0	2	Yes	0.349938	0.444242	0.0901502	0.0542865	0.0303549	0.031047	0	0.132218	N/A	Yes	0.294777	0.0307009	Yes	5.81457	-2.98656	1.40663	-2.1232	0.0337372	0.192601	other	intronic	0	0	0	0	0	0	0	0	0	0	0	0	0	0
wt_saf_neg_peak_33103	chr12	24073953	24074039	-	87	5	10	9	0	1	0	0	3	Yes	0.134592	0.296161	0.270451	0	0.0303549	0	0	0.198327	N/A	Yes	0.233734	0.0151774	Yes	4.49272	-3.6567	1.77649	-2.05839	0.0395531	0.213595	protein_coding	intronic	0	0	0	0	0	0	0	0	0	0	0	0	0	0
wt_saf_neg_peak_33135	chr12	24212365	24212639	-	275	16	10	7	0	2	0	0	4	Yes	0.430693	0.296161	0.21035	0	0.0607097	0	0	0.264436	N/A	Yes	0.312402	0.0303549	Yes	6.16945	-3.09579	1.37449	-2.25232	0.0243023	0.154547	other	intronic	0	0	0	0	0	0	0	0	0	0	0	1	0	0
wt_saf_neg_peak_33170	chr12	24702899	24703353	-	455	10	4	5	4	0	0	0	3	Yes	0.269183	0.118464	0.15025	0.0542865	0	0	0	0.198327	N/A	Yes	0.179299	0	Yes	3.30348	-4.72874	1.90997	-2.47581	0.0132933	0.104174	other	intronic	0	0	0	0	0	0	0	0	0	0	0	0	0	0
wt_saf_neg_peak_33232	chr12	27404457	27404542	-	86	3	5	7	1	0	0	0	3	Yes	0.080755	0.148081	0.21035	0.0135716	0	0	0	0.198327	N/A	Yes	0.146395	0	Yes	2.68772	-4.42422	1.99923	-2.21296	0.0269004	NA	other	intronic	0	1	0	0	0	0	0	0	0	0	0	0	0	0
wt_saf_neg_peak_33248	chr12	28689688	28689835	-	148	11	11	11	5	0	3	0	2	Yes	0.296102	0.325777	0.330551	0.0678582	0	0.0931411	0	0.132218	N/A	Yes	0.317477	0.0465706	Yes	6.52305	-2.49775	1.2175	-2.05155	0.0402139	0.2158	other	intronic	0	0	0	0	0	0	0	0	0	0	0	1	0	0
wt_saf_neg_peak_33281	chr12	30888278	30888650	-	373	15	8	17	0	0	0	0	1	Yes	0.403775	0.236929	0.510851	0	0	0	0	0.0661091	N/A	Yes	0.383852	0	Yes	7.08389	-5.82505	1.68347	-3.46015	0.000539873	0.00990462	other	intronic	0	0	0	0	0	0	0	0	0	0	0	0	0	0
wt_saf_neg_peak_33294	chr12	31111028	31111343	-	316	6	2	10	1	0	0	0	3	Yes	0.16151	0.0592322	0.300501	0.0135716	0	0	0	0.198327	N/A	Yes	0.173748	0	Yes	3.22132	-4.68591	1.95302	-2.39931	0.0164259	0.119664	other	intronic	0	1	0	0	0	0	0	0	0	0	0	0	0	0
wt_saf_neg_peak_33385	chr12	31980469	31980900	-	432	12	2	5	3	0	0	0	0	Yes	0.32302	0.0592322	0.15025	0.0407149	0	0	0	0	N/A	Yes	0.177501	0	Yes	3.28507	-4.72159	1.95068	-2.42049	0.0154996	0.115076	protein_coding	intronic	0	1	0	0	0	0	0	0	0	0	0	0	0	0
wt_saf_neg_peak_33483	chr12	34675008	34675082	-	75	8	8	3	2	0	0	0	0	Yes	0.215347	0.236929	0.0901502	0.0271433	0	0	0	0	N/A	Yes	0.180809	0	Yes	3.29921	-4.7273	1.91263	-2.47162	0.0134501	0.104996	protein_coding	intronic	0	0	0	0	0	0	0	0	0	0	0	0	0	0
wt_saf_neg_peak_33513	chr12	34746815	34746904	-	90	7	9	7	5	0	0	0	0	Yes	0.188428	0.266545	0.21035	0.0678582	0	0	0	0	N/A	Yes	0.221775	0	Yes	4.05672	-5.02183	1.82002	-2.75922	0.00579395	0.0593317	protein_coding	intronic	0	0	0	0	0	0	0	0	0	0	1	0	0	0
wt_saf_neg_peak_33540	chr12	34803162	34803289	-	128	6	6	6	2	0	0	0	0	Yes	0.16151	0.177697	0.1803	0.0271433	0	0	0	0	N/A	Yes	0.173169	0	Yes	3.17594	-4.66858	1.90858	-2.4461	0.014441	0.110087	protein_coding	intronic	0	0	0	0	0	0	0	0	0	0	0	0	0	0
wt_saf_neg_peak_33565	chr12	35498162	35498941	-	780	10	21	17	24	0	6	0	0	Yes	0.269183	0.621938	0.510851	0.325719	0	0.186282	0	0	N/A	No	0.467324	0.0931411	Yes	9.93676	-2.04234	0.993133	-2.05647	0.0397377	0.214239	protein_coding	UTR3	1	0	0	0	0	0	0	0	0	0	0	0	0	0
wt_saf_neg_peak_33572	chr12	35510862	35510994	-	133	11	4	7	3	0	0	0	0	Yes	0.296102	0.118464	0.21035	0.0407149	0	0	0	0	N/A	Yes	0.208306	0	Yes	3.84415	-4.94622	1.85541	-2.66584	0.00767968	0.0721351	protein_coding	intronic	0	0	0	0	0	0	0	0	0	0	0	0	0	0
wt_saf_neg_peak_33573	chr12	35512321	35512395	-	75	7	6	1	0	0	0	0	0	Yes	0.188428	0.177697	0.0300501	0	0	0	0	0	N/A	Yes	0.132058	0	Yes	2.40709	-4.27447	2.09359	-2.04169	0.0411823	NA	protein_coding	intronic	0	0	0	0	0	0	0	0	0	0	0	0	0	0
wt_saf_neg_peak_33639	chr12	36342337	36342631	-	295	11	3	10	4	1	0	0	4	Yes	0.296102	0.0888483	0.300501	0.0542865	0.0303549	0	0	0.264436	N/A	Yes	0.228484	0.0151774	Yes	4.44881	-3.64447	1.79999	-2.02472	0.0428963	0.224997	other	intronic	0	1	0	0	0	0	0	0	0	0	0	0	0	0
wt_saf_neg_peak_33691	chr12	40331333	40331407	-	75	4	7	6	2	0	0	0	0	Yes	0.107673	0.207313	0.1803	0.0271433	0	0	0	0	N/A	Yes	0.165096	0	Yes	3.01863	-4.59384	1.93804	-2.37035	0.0177712	0.125857	protein_coding	intronic	0	0	0	0	0	0	0	0	0	0	0	0	0	0
wt_saf_neg_peak_33712	chr12	40384862	40384936	-	75	6	2	5	2	0	0	0	0	Yes	0.16151	0.0592322	0.15025	0.0271433	0	0	0	0	N/A	Yes	0.123664	0	Yes	2.28595	-4.19488	2.08388	-2.01301	0.0441134	NA	protein_coding	intronic	0	1	0	0	0	0	0	0	0	0	0	0	0	0
wt_saf_neg_peak_33789	chr12	44874208	44874944	-	737	21	6	13	19	1	2	0	4	Yes	0.565285	0.177697	0.390651	0.257861	0.0303549	0.0620941	0	0.264436	N/A	No	0.377878	0.0462245	Yes	7.66941	-2.77478	1.18225	-2.34703	0.0189237	0.130834	protein_coding	intronic	0	1	0	0	0	0	0	0	0	0	0	0	0	0
wt_saf_neg_peak_33799	chr12	44958666	44959109	-	444	2	20	8	4	0	1	0	0	Yes	0.0538367	0.592322	0.240401	0.0542865	0	0.031047	0	0	N/A	Yes	0.29552	0.0155235	Yes	5.57771	-3.96909	1.78951	-2.21798	0.0265561	0.164094	protein_coding	intronic	0	0	0	0	0	0	0	0	0	0	0	1	0	0
wt_saf_neg_peak_33835	chr12	46724101	46724295	-	195	6	9	4	0	0	0	0	0	Yes	0.16151	0.266545	0.1202	0	0	0	0	0	N/A	Yes	0.182752	0	Yes	3.32898	-4.73822	1.9021	-2.49105	0.0127365	0.101299	protein_coding	intronic	0	0	0	2	0	0	0	0	0	0	0	0	0	0
wt_saf_neg_peak_33841	chr12	46748866	46750005	-	1140	24	15	34	26	5	3	0	2	Yes	0.64604	0.444242	1.0217	0.352863	0.151774	0.0931411	0	0.132218	N/A	No	0.703995	0.122458	Yes	14.7892	-2.26135	0.799588	-2.82814	0.00468191	0.0510414	protein_coding	intronic	0	1	0	1	0	0	0	0	0	0	0	0	0	0
wt_saf_neg_peak_33849	chr12	46776308	46777061	-	754	11	19	12	0	0	3	0	0	Yes	0.296102	0.562706	0.360601	0	0	0.0931411	0	0	N/A	Yes	0.40647	0.0465706	Yes	8.11596	-2.84844	1.1643	-2.44648	0.0144258	0.110021	protein_coding	intronic	0	2	0	0	0	0	0	0	0	0	0	0	0	0
wt_saf_neg_peak_33866	chr12	47596918	47597013	-	96	1	11	8	1	0	0	0	0	Yes	0.0269183	0.325777	0.240401	0.0135716	0	0	0	0	N/A	Yes	0.197699	0	Yes	3.59613	-4.84437	1.95086	-2.4832	0.0130207	0.102744	other	intronic	0	0	1	0	0	0	0	0	0	0	1	0	0	0
wt_saf_neg_peak_33907	chr12	50469026	50469279	-	254	2	9	5	7	0	0	0	3	Yes	0.0538367	0.266545	0.15025	0.0950014	0	0	0	0.198327	N/A	No	0.156877	0	Yes	2.84997	-4.51044	1.99873	-2.25665	0.0240297	NA	protein_coding	intronic	0	0	0	0	0	0	0	0	0	0	0	0	0	0
wt_saf_neg_peak_33912	chr12	50505654	50505820	-	167	4	8	5	0	0	0	0	0	Yes	0.107673	0.236929	0.15025	0	0	0	0	0	N/A	Yes	0.164951	0	Yes	3.00728	-4.58935	1.943	-2.36199	0.018177	0.127516	protein_coding	intronic	0	0	0	0	0	0	0	0	0	0	0	0	0	0
wt_saf_neg_peak_33913	chr12	50508583	50510024	-	1442	43	14	20	0	1	7	0	3	Yes	1.15749	0.414626	0.601001	0	0.0303549	0.217329	0	0.198327	N/A	Yes	0.724372	0.123842	Yes	15.2157	-2.28523	0.841205	-2.71661	0.00659535	0.0648717	protein_coding	intronic	0	0	0	1	0	0	0	0	1	0	4	1	0	0
wt_saf_neg_peak_33928	chr12	50565807	50566741	-	935	23	14	19	9	5	1	0	1	Yes	0.619122	0.414626	0.570951	0.122145	0.151774	0.031047	0	0.0661091	N/A	Yes	0.5349	0.0914107	Yes	11.1739	-2.2871	0.906764	-2.52227	0.01166	0.0957061	protein_coding	intronic	0	0	1	1	0	0	0	0	0	0	0	1	0	0
wt_saf_neg_peak_33961	chr12	50788204	50788281	-	78	3	5	5	0	0	0	0	0	Yes	0.080755	0.148081	0.15025	0	0	0	0	0	N/A	Yes	0.126362	0	Yes	2.31358	-4.20951	2.06276	-2.04072	0.0412791	NA	other	intronic	0	1	0	0	0	0	0	0	0	0	0	0	0	0
wt_saf_neg_peak_34153	chr12	52239360	52239580	-	221	117	126	73	43	27	27	0	4	Yes	3.14945	3.73163	2.19365	0.58358	0.819581	0.83827	0	0.264436	N/A	Yes	3.02491	0.828926	Yes	67.5029	-1.59442	0.367914	-4.33369	1.4663e-05	0.000484655	other	intronic	0	1	0	0	0	0	0	0	0	0	1	0	0	0
wt_saf_neg_peak_34265	chr12	54840393	54840863	-	471	6	2	13	0	0	0	0	0	Yes	0.16151	0.0592322	0.390651	0	0	0	0	0	N/A	Yes	0.203798	0	Yes	3.78254	-4.91648	1.90947	-2.57479	0.01003	0.0864721	other	intronic	0	0	0	1	0	0	0	0	0	0	0	0	0	0
wt_saf_neg_peak_34288	chr12	54924724	54925073	-	350	25	37	16	41	11	5	0	0	Yes	0.672958	1.0958	0.480801	0.556437	0.333903	0.155235	0	0	N/A	No	0.749852	0.244569	Yes	17.2364	-1.34238	0.682288	-1.96747	0.0491295	0.245178	protein_coding	intronic	0	0	0	0	0	0	0	0	0	0	0	1	0	0
wt_saf_neg_peak_34309	chr12	54970817	54970946	-	130	12	15	8	3	0	3	0	0	Yes	0.32302	0.444242	0.240401	0.0407149	0	0.0931411	0	0	N/A	Yes	0.335887	0.0465706	Yes	6.83126	-2.5742	1.2122	-2.12358	0.0337056	0.192476	protein_coding	intronic	0	1	0	0	0	0	0	0	0	0	0	0	0	0
wt_saf_neg_peak_34411	chr12	55759391	55759553	-	163	9	13	6	13	0	1	0	0	Yes	0.242265	0.38501	0.1803	0.176431	0	0.031047	0	0	N/A	No	0.269192	0.0155235	Yes	5.1391	-3.84999	1.73607	-2.21765	0.0265789	0.164184	protein_coding	intronic	0	0	0	0	0	0	0	0	0	0	0	0	0	0
wt_saf_neg_peak_34439	chr12	56263355	56263997	-	643	11	11	5	0	0	0	0	3	Yes	0.296102	0.325777	0.15025	0	0	0	0	0.198327	N/A	Yes	0.257376	0	Yes	4.70011	-5.23729	1.78442	-2.93501	0.00333537	0.0400234	other	intronic	0	0	0	2	0	0	0	0	0	0	1	0	0	0
wt_saf_neg_peak_34446	chr12	56319148	56319377	-	230	9	15	4	4	0	1	0	2	Yes	0.242265	0.444242	0.1202	0.0542865	0	0.031047	0	0.132218	N/A	Yes	0.268902	0.0155235	Yes	5.11641	-3.84399	1.75669	-2.18819	0.0286555	0.172837	other	intronic	0	0	0	0	0	0	0	0	0	0	0	0	0	0
wt_saf_neg_peak_34505	chr12	59048077	59048246	-	170	5	6	3	5	0	0	0	0	Yes	0.134592	0.177697	0.0901502	0.0678582	0	0	0	0	N/A	No	0.134146	0	Yes	2.4482	-4.29531	2.0334	-2.11237	0.0346543	NA	protein_coding	intronic	0	0	0	0	0	0	0	0	0	0	0	0	0	0
wt_saf_neg_peak_34544	chr12	64008010	64008088	-	79	4	5	5	0	0	0	0	1	Yes	0.107673	0.148081	0.15025	0	0	0	0	0.0661091	N/A	Yes	0.135335	0	Yes	2.4801	-4.31084	2.02139	-2.13262	0.0329562	NA	other	intronic	0	1	0	0	0	0	0	0	0	0	0	0	0	0
wt_saf_neg_peak_34735	chr12	69755704	69755886	-	183	7	8	5	9	0	0	0	0	Yes	0.188428	0.236929	0.15025	0.122145	0	0	0	0	N/A	No	0.191869	0	Yes	3.50684	-4.81311	1.8732	-2.56946	0.0101857	0.0874216	protein_coding	intronic	0	0	0	0	0	0	0	0	0	0	0	0	0	0
wt_saf_neg_peak_34743	chr12	69813966	69814128	-	163	17	28	30	11	3	2	0	0	Yes	0.457612	0.829251	0.901502	0.149288	0.0910646	0.0620941	0	0	N/A	Yes	0.729455	0.0765793	Yes	14.488	-2.9779	0.885535	-3.36283	0.000771478	0.0131342	protein_coding	intronic	0	0	0	1	0	0	0	0	0	0	0	0	0	0
wt_saf_neg_peak_34786	chr12	69950257	69950437	-	181	10	9	2	0	0	0	0	0	Yes	0.269183	0.266545	0.0601001	0	0	0	0	0	N/A	Yes	0.19861	0	Yes	3.62091	-4.86288	1.90289	-2.55552	0.0106028	0.0897564	other	intronic	0	1	0	0	0	0	0	0	0	0	0	0	0	0
wt_saf_neg_peak_34846	chr12	70968318	70968407	-	90	5	7	1	5	0	0	0	0	Yes	0.134592	0.207313	0.0300501	0.0678582	0	0	0	0	N/A	No	0.123985	0	Yes	2.24978	-4.17562	2.12736	-1.96282	0.0496676	NA	other	intronic	0	0	0	0	0	0	0	0	0	0	0	0	0	0
wt_saf_neg_peak_34920	chr12	72249337	72249610	-	274	2	5	6	9	0	0	0	1	Yes	0.0538367	0.148081	0.1803	0.122145	0	0	0	0.0661091	N/A	No	0.127406	0	Yes	2.33413	-4.22034	2.07803	-2.03093	0.0422621	NA	protein_coding	intronic	0	0	0	1	0	0	0	0	0	0	0	0	0	0
wt_saf_neg_peak_34937	chr12	72365208	72365693	-	486	8	5	4	0	0	0	0	0	Yes	0.215347	0.148081	0.1202	0	0	0	0	0	N/A	Yes	0.161209	0	Yes	2.9591	-4.56976	1.94587	-2.34845	0.0188519	0.130489	protein_coding	intronic	0	0	0	0	0	0	0	0	0	0	0	0	0	0
wt_saf_neg_peak_35003	chr12	73072595	73072753	-	159	8	3	5	0	0	0	0	0	Yes	0.215347	0.0888483	0.15025	0	0	0	0	0	N/A	Yes	0.151482	0	Yes	2.79472	-4.48637	1.98044	-2.26535	0.0234914	NA	other	intronic	0	1	0	0	0	0	0	0	0	0	0	0	0	0
wt_saf_neg_peak_35324	chr12	79078379	79079020	-	642	28	21	24	22	5	6	0	2	Yes	0.753713	0.621938	0.721202	0.298576	0.151774	0.186282	0	0.132218	N/A	Yes	0.698951	0.169028	Yes	15.3394	-1.78089	0.712276	-2.50029	0.0124093	0.0995964	other	intronic	0	0	0	0	0	0	0	0	0	0	0	0	0	0
wt_saf_neg_peak_35391	chr12	79480169	79480320	-	152	67	139	112	28	38	33	0	4	Yes	1.80353	4.11664	3.36561	0.380006	1.15348	1.02455	0	0.264436	N/A	Yes	3.09526	1.08902	Yes	72.569	-1.23076	0.380713	-3.23278	0.00122591	0.0187806	other	intronic	0	0	0	0	0	0	0	0	0	0	2	1	0	0
wt_saf_neg_peak_35405	chr12	79805651	79805886	-	236	15	9	5	5	1	1	0	0	Yes	0.403775	0.266545	0.15025	0.0678582	0.0303549	0.031047	0	0	N/A	Yes	0.273523	0.0307009	Yes	5.46739	-2.89034	1.39631	-2.06999	0.0384535	0.20964	other	intronic	0	0	0	0	0	0	0	0	0	0	1	1	0	0
wt_saf_neg_peak_35415	chr12	80121102	80121627	-	526	16	10	26	15	5	2	0	4	Yes	0.430693	0.296161	0.781302	0.203575	0.151774	0.0620941	0	0.264436	N/A	Yes	0.502719	0.106934	Yes	10.8483	-1.97293	0.904689	-2.18078	0.0291995	0.174993	other	intronic	0	3	0	0	0	0	0	0	0	0	1	1	0	0
wt_saf_neg_peak_35444	chr12	80201674	80201844	-	171	22	36	19	22	10	5	0	1	Yes	0.592203	1.06618	0.570951	0.298576	0.303549	0.155235	0	0.0661091	N/A	No	0.743112	0.229392	Yes	16.9032	-1.42078	0.682208	-2.08262	0.0372857	0.205517	protein_coding	intronic	0	0	0	0	0	0	0	0	0	0	0	0	0	0
wt_saf_neg_peak_35484	chr12	80346276	80346617	-	342	5	1	9	0	0	0	0	0	Yes	0.134592	0.0296161	0.270451	0	0	0	0	0	N/A	Yes	0.144886	0	Yes	2.692	-4.42646	2.05982	-2.14895	0.031638	NA	protein_coding	intronic	0	0	1	0	0	0	0	0	0	0	0	2	0	0
wt_saf_neg_peak_35531	chr12	80623319	80623632	-	314	6	9	8	0	0	0	0	0	Yes	0.16151	0.266545	0.240401	0	0	0	0	0	N/A	Yes	0.222819	0	Yes	4.07727	-5.02793	1.82144	-2.76041	0.00577288	0.0592017	other	intronic	0	0	0	1	0	0	0	0	0	0	0	1	0	0
wt_saf_neg_peak_35545	chr12	80756777	80757089	-	313	4	6	5	7	0	0	0	4	Yes	0.107673	0.177697	0.15025	0.0950014	0	0	0	0.264436	N/A	No	0.145207	0	Yes	2.65582	-4.40977	1.99074	-2.21514	0.0267503	NA	protein_coding	UTR3	0	0	0	0	0	0	0	0	0	0	0	0	0	0
wt_saf_neg_peak_35565	chr12	81314401	81315324	-	924	35	15	14	40	7	4	0	1	Yes	0.942142	0.444242	0.420701	0.542865	0.212484	0.124188	0	0.0661091	N/A	No	0.602361	0.168336	Yes	13.5513	-1.58107	0.779557	-2.02816	0.0425436	0.223842	protein_coding	exonic	0	0	0	0	0	0	0	0	0	0	0	0	0	0
wt_saf_neg_peak_35566	chr12	81316272	81316614	-	343	6	5	4	0	0	0	0	0	Yes	0.16151	0.148081	0.1202	0	0	0	0	0	N/A	Yes	0.143264	0	Yes	2.62606	-4.39617	1.99322	-2.20557	0.0274143	NA	protein_coding	intronic	0	0	0	0	0	0	0	0	0	0	0	0	0	0
wt_saf_neg_peak_35572	chr12	81358406	81358504	-	99	9	2	6	0	0	0	0	1	Yes	0.242265	0.0592322	0.1803	0	0	0	0	0.0661091	N/A	Yes	0.160599	0	Yes	2.97258	-4.57502	1.97567	-2.31568	0.0205757	0.13804	other	intronic	0	0	0	0	0	0	0	0	0	0	0	0	0	0
wt_saf_neg_peak_35574	chr12	81359730	81360246	-	517	27	25	19	9	6	5	0	1	Yes	0.726795	0.740403	0.570951	0.122145	0.182129	0.155235	0	0.0661091	N/A	Yes	0.679383	0.168682	Yes	14.9261	-1.7405	0.717716	-2.42506	0.015306	0.114264	protein_coding	intronic	0	1	0	0	0	0	0	0	0	0	0	1	0	0
wt_saf_neg_peak_35625	chr12	81490501	81490677	-	177	21	5	14	9	2	2	0	3	Yes	0.565285	0.148081	0.420701	0.122145	0.0607097	0.0620941	0	0.198327	N/A	Yes	0.378022	0.0614019	Yes	7.89992	-2.36709	1.10602	-2.14019	0.0323393	0.187223	protein_coding	intronic	0	0	0	0	0	0	0	0	0	0	0	1	0	0
wt_saf_neg_peak_35666	chr12	81717053	81717217	-	165	14	17	9	25	2	3	0	3	Yes	0.376857	0.503474	0.270451	0.339291	0.0607097	0.0931411	0	0.198327	N/A	No	0.383594	0.0769254	Yes	8.14116	-2.04286	1.00736	-2.02793	0.0425673	0.223909	other	intronic	0	0	0	0	0	0	0	0	0	0	0	0	0	0
wt_saf_neg_peak_35702	chr12	81951521	81951787	-	267	15	10	6	0	0	0	0	3	Yes	0.403775	0.296161	0.1803	0	0	0	0	0.198327	N/A	Yes	0.293412	0	Yes	5.37753	-5.43227	1.74771	-3.10823	0.00188214	0.0260443	other	intronic	0	1	0	0	0	0	0	0	0	0	0	0	0	0
wt_saf_neg_peak_35834	chr12	84043137	84043457	-	321	10	14	2	3	0	0	0	4	Yes	0.269183	0.414626	0.0601001	0.0407149	0	0	0	0.264436	N/A	Yes	0.24797	0	Yes	4.49955	-5.17535	1.84525	-2.80468	0.00503666	0.0537088	lncRNA	exonic	0	0	0	0	0	0	0	0	0	0	0	1	0	0
wt_saf_neg_peak_35880	chr12	84354577	84355038	-	462	19	10	5	32	0	1	0	4	Yes	0.511448	0.296161	0.15025	0.434292	0	0.031047	0	0.264436	N/A	No	0.319287	0.0155235	Yes	6.09004	-4.10968	1.71354	-2.39836	0.0164687	0.119848	protein_coding	exonic	0	0	0	0	0	0	0	0	0	0	0	0	0	0
wt_saf_neg_peak_35973	chr12	85052698	85052795	-	98	7	9	5	0	0	0	0	1	Yes	0.188428	0.266545	0.15025	0	0	0	0	0.0661091	N/A	Yes	0.201741	0	Yes	3.68257	-4.88364	1.85773	-2.62882	0.00856828	0.0777557	other	intronic	0	0	1	1	0	0	0	0	0	0	0	0	0	0
wt_saf_neg_peak_35980	chr12	85094207	85094509	-	303	7	13	1	2	0	0	0	3	Yes	0.188428	0.38501	0.0300501	0.0271433	0	0	0	0.198327	N/A	Yes	0.201163	0	Yes	3.63719	-4.86814	1.94717	-2.50011	0.0124156	0.099641	protein_coding	exonic	0	0	0	0	0	0	0	0	0	0	0	0	0	0
wt_saf_neg_peak_36061	chr12	85803567	85803780	-	214	3	5	5	4	0	0	0	4	Yes	0.080755	0.148081	0.15025	0.0542865	0	0	0	0.264436	N/A	Yes	0.126362	0	Yes	2.31358	-4.20951	2.06276	-2.04072	0.0412791	NA	other	intronic	0	0	0	0	0	0	0	0	0	0	0	1	0	0
wt_saf_neg_peak_36073	chr12	85902233	85902357	-	125	2	8	6	0	0	0	0	0	Yes	0.0538367	0.236929	0.1803	0	0	0	0	0	N/A	Yes	0.157022	0	Yes	2.86132	-4.51523	1.99237	-2.26626	0.0234356	NA	other	intronic	0	1	0	0	0	0	0	0	0	0	0	0	0	0
wt_saf_neg_peak_36083	chr12	86430352	86430637	-	286	19	18	1	8	0	3	0	2	Yes	0.511448	0.53309	0.0300501	0.108573	0	0.0931411	0	0.132218	N/A	Yes	0.358196	0.0465706	Yes	7.21457	-2.66118	1.32825	-2.00353	0.0451207	0.23216	other	intronic	0	0	0	0	0	0	0	0	0	0	0	0	0	0
wt_saf_neg_peak_36108	chr12	86487591	86487706	-	116	3	5	7	7	0	0	0	0	Yes	0.080755	0.148081	0.21035	0.0950014	0	0	0	0	N/A	No	0.146395	0	Yes	2.68772	-4.42422	1.99923	-2.21296	0.0269004	NA	other	intronic	0	0	0	0	0	0	0	0	0	0	0	2	0	0
wt_saf_neg_peak_36161	chr12	87153794	87153943	-	150	10	5	1	1	0	0	0	3	Yes	0.269183	0.148081	0.0300501	0.0135716	0	0	0	0.198327	N/A	Yes	0.149105	0	Yes	2.73092	-4.45786	2.04865	-2.176	0.0295551	NA	lncRNA	intronic	0	0	0	2	0	0	0	0	0	0	0	0	0	0
wt_saf_neg_peak_36255	chr12	87372565	87372711	-	147	22	14	5	0	2	0	0	1	Yes	0.592203	0.414626	0.15025	0	0.0607097	0	0	0.0661091	N/A	Yes	0.385693	0.0303548	Yes	7.49733	-3.39742	1.35266	-2.51165	0.0120168	0.097688	protein_coding	intronic	0	0	0	0	0	0	0	0	0	0	0	1	0	0
wt_saf_neg_peak_36302	chr12	88352932	88353080	-	149	11	5	8	8	0	1	0	0	Yes	0.296102	0.148081	0.2404	0.108573	0	0.031047	0	0	N/A	Yes	0.228194	0.0155235	Yes	4.44045	-3.62736	1.77658	-2.04176	0.0411751	0.218938	other	intronic	0	0	0	0	0	0	0	0	0	0	0	0	0	0
wt_saf_neg_peak_36339	chr12	91058870	91059531	-	662	32	32	22	21	9	8	0	0	Yes	0.861387	0.947716	0.661101	0.285004	0.273194	0.248376	0	0	N/A	Yes	0.823401	0.260785	Yes	18.908	-1.388	0.621384	-2.23373	0.0255009	0.159686	protein_coding	intronic	0	0	0	0	0	0	0	0	0	0	0	0	0	0
wt_saf_neg_peak_36347	chr12	91076310	91076659	-	350	29	21	13	6	4	3	0	1	Yes	0.780632	0.621938	0.390651	0.0814298	0.121419	0.0931411	0	0.0661091	N/A	Yes	0.59774	0.10728	Yes	12.5285	-2.2112	0.842059	-2.62594	0.00864096	0.0782308	protein_coding	intronic	0	0	0	1	0	0	0	0	0	0	0	0	0	0
wt_saf_neg_peak_36350	chr12	91082572	91082647	-	76	7	6	3	4	0	0	0	0	Yes	0.188428	0.177697	0.0901502	0.0542865	0	0	0	0	N/A	Yes	0.152092	0	Yes	2.78124	-4.48069	1.97715	-2.26623	0.0234373	NA	protein_coding	intronic	0	0	0	0	0	0	0	0	0	0	1	0	0	0
wt_saf_neg_peak_36358	chr12	91114625	91114755	-	131	12	7	6	3	0	0	0	0	Yes	0.32302	0.207313	0.1803	0.0407149	0	0	0	0	N/A	Yes	0.236878	0	Yes	4.35079	-5.12589	1.80427	-2.84097	0.0044976	0.049543	protein_coding	intronic	0	0	0	0	0	0	0	0	0	0	0	0	0	0
wt_saf_neg_peak_36364	chr12	91127537	91128436	-	900	46	24	34	10	11	14	0	1	Yes	1.23824	0.710787	1.0217	0.135716	0.333903	0.434659	0	0.0661091	N/A	Yes	0.990244	0.384281	Yes	23.9177	-1.10181	0.561048	-1.96384	0.0495488	0.246454	protein_coding	intronic	0	1	0	0	0	0	0	0	0	0	0	0	0	0
wt_saf_neg_peak_36508	chr12	91693616	91694120	-	505	8	7	24	3	2	1	0	4	Yes	0.215347	0.207313	0.721202	0.0407149	0.0607097	0.031047	0	0.264436	N/A	Yes	0.381287	0.0458784	Yes	7.72386	-2.79224	1.20741	-2.31258	0.0207459	0.138876	protein_coding	intronic	0	0	0	1	0	0	0	0	0	0	0	0	0	0
wt_saf_neg_peak_36525	chr12	91733243	91733578	-	336	9	3	11	7	0	1	0	3	Yes	0.242265	0.0888484	0.330551	0.0950014	0	0.031047	0	0.198327	N/A	Yes	0.220555	0.0155235	Yes	4.31718	-3.58073	1.80749	-1.98105	0.0475858	0.240155	protein_coding	intronic	0	0	0	0	0	0	0	0	0	0	0	0	0	0
wt_saf_neg_peak_36612	chr12	98639493	98639608	-	116	1	5	7	3	0	0	0	2	Yes	0.0269183	0.148081	0.21035	0.0407149	0	0	0	0.132218	N/A	Yes	0.12845	0	Yes	2.35468	-4.23142	2.11369	-2.00191	0.0452942	NA	other	intronic	0	1	0	0	0	0	0	0	0	0	0	0	0	0
wt_saf_neg_peak_36624	chr12	98696436	98696633	-	198	13	8	10	0	0	0	0	4	Yes	0.349938	0.236929	0.300501	0	0	0	0	0.264436	N/A	Yes	0.295789	0	Yes	5.44133	-5.44654	1.73492	-3.13936	0.0016932	0.0240021	protein_coding	intronic	0	0	0	0	0	0	0	0	0	0	0	0	0	0
wt_saf_neg_peak_36640	chr12	98717779	98718027	-	249	19	18	3	19	0	2	0	0	Yes	0.511448	0.53309	0.0901502	0.257861	0	0.0620941	0	0	N/A	No	0.378229	0.031047	Yes	7.35522	-3.33355	1.37855	-2.41816	0.0155992	0.115609	protein_coding	intronic	0	0	0	0	0	0	0	0	0	0	0	0	0	0
wt_saf_neg_peak_36660	chr12	98780907	98780985	-	79	8	4	7	0	0	0	0	1	Yes	0.215347	0.118465	0.21035	0	0	0	0	0.0661091	N/A	Yes	0.181387	0	Yes	3.34459	-4.7437	1.89815	-2.49912	0.0124502	0.0997604	other	intronic	0	0	0	0	0	0	0	0	0	0	0	1	0	0
wt_saf_neg_peak_36819	chr12	99397545	99397957	-	413	9	8	8	5	0	1	0	3	Yes	0.242265	0.236929	0.2404	0.0678582	0	0.031047	0	0.198327	N/A	Yes	0.239865	0.0155235	Yes	4.6346	-3.69184	1.7533	-2.10566	0.0352342	0.198133	protein_coding	intronic	1	0	0	0	0	0	0	0	0	0	0	0	0	0
wt_saf_neg_peak_36828	chr12	99425475	99425819	-	345	10	10	9	1	2	0	0	3	Yes	0.269183	0.296161	0.270451	0.0135716	0.0607097	0	0	0.198327	N/A	Yes	0.278598	0.0303548	Yes	5.54448	-2.92633	1.39295	-2.10082	0.0356572	0.199661	protein_coding	intronic	0	0	0	0	0	0	0	0	0	0	0	0	0	0
wt_saf_neg_peak_36835	chr12	99436735	99436873	-	139	3	7	5	0	0	0	0	2	Yes	0.080755	0.207313	0.15025	0	0	0	0	0.132218	N/A	Yes	0.146106	0	Yes	2.66503	-4.41403	2.00111	-2.20579	0.0273989	NA	protein_coding	intronic	0	0	0	0	0	0	0	0	0	0	0	2	0	0
wt_saf_neg_peak_36840	chr12	99446592	99446683	-	92	5	6	4	9	0	0	0	0	Yes	0.134592	0.177697	0.1202	0.122145	0	0	0	0	N/A	No	0.144163	0	Yes	2.63527	-4.40042	1.99245	-2.20855	0.0272058	NA	protein_coding	intronic	0	0	0	0	0	0	0	0	0	0	0	1	0	0
wt_saf_neg_peak_36842	chr12	99456910	99457297	-	388	6	5	2	0	0	0	0	4	Yes	0.16151	0.148081	0.0601001	0	0	0	0	0.264436	N/A	Yes	0.12323	0	Yes	2.25191	-4.17691	2.08823	-2.00022	0.0454764	NA	other	intronic	0	0	0	0	0	0	0	0	0	0	0	0	0	0
wt_saf_neg_peak_36844	chr12	99463041	99463423	-	383	23	33	25	0	0	0	0	3	Yes	0.619122	0.977332	0.751252	0	0	0	0	0.198327	N/A	Yes	0.782568	0	Yes	14.3059	-6.83978	1.56453	-4.37179	1.23232e-05	0.000417021	other	intronic	0	0	0	0	0	0	0	0	0	0	2	2	0	0
wt_saf_neg_peak_36851	chr12	99475140	99475491	-	352	8	6	3	10	0	0	0	0	Yes	0.215347	0.177697	0.0901502	0.135716	0	0	0	0	N/A	No	0.161064	0	Yes	2.94775	-4.56512	1.95507	-2.33501	0.0195427	0.133485	other	intronic	0	0	0	0	0	0	0	0	0	0	0	0	0	0
wt_saf_neg_peak_36860	chr12	99498309	99498825	-	517	11	27	5	21	2	0	0	0	Yes	0.296102	0.799635	0.15025	0.285004	0.0607097	0	0	0	N/A	No	0.415329	0.0303548	Yes	7.95009	-3.48426	1.36194	-2.5583	0.0105184	0.0892939	other	intronic	0	0	0	0	0	0	0	0	0	0	0	0	0	0
wt_saf_neg_peak_36867	chr12	99512078	99512153	-	76	10	7	9	7	1	0	0	2	Yes	0.269183	0.207313	0.270451	0.0950014	0.0303548	0	0	0.132218	N/A	Yes	0.248982	0.0151774	Yes	4.79813	-3.75865	1.74747	-2.15091	0.0314831	0.183852	other	intronic	0	0	0	0	0	0	0	0	0	0	0	0	0	0
wt_saf_neg_peak_36869	chr12	99514340	99514523	-	184	9	7	11	6	1	1	0	0	Yes	0.242265	0.207313	0.330551	0.0814298	0.0303548	0.031047	0	0	N/A	Yes	0.260043	0.030701	Yes	5.23926	-2.81654	1.39283	-2.02217	0.0431592	0.22591	other	intronic	0	0	0	0	0	0	0	0	0	0	0	0	0	0
wt_saf_neg_peak_36896	chr12	99701063	99701422	-	360	10	15	8	6	1	1	0	2	Yes	0.269183	0.444242	0.2404	0.0814298	0.0303548	0.031047	0	0.132218	N/A	Yes	0.317942	0.030701	Yes	6.25039	-3.09567	1.34634	-2.29931	0.0214871	0.142052	other	intronic	0	0	0	0	0	0	0	0	0	0	0	0	0	0
wt_saf_neg_peak_36905	chr12	99716688	99716950	-	263	10	11	13	1	0	0	0	3	Yes	0.269183	0.325777	0.390651	0.0135716	0	0	0	0.198327	N/A	Yes	0.328537	0	Yes	6.03018	-5.59237	1.7082	-3.27383	0.001061	0.016787	other	intronic	0	0	0	0	0	0	0	0	0	0	0	0	0	0
wt_saf_neg_peak_36964	chr12	99818043	99818152	-	110	18	8	5	12	0	1	0	4	Yes	0.48453	0.236929	0.15025	0.16286	0	0.031047	0	0.264436	N/A	No	0.29057	0.0155235	Yes	5.57206	-3.97581	1.73483	-2.29176	0.0219197	0.144019	protein_coding	intronic	0	0	0	1	0	0	0	0	0	0	0	1	0	0
wt_saf_neg_peak_36999	chr12	99969082	99969564	-	483	17	10	7	0	0	0	0	0	Yes	0.457612	0.296161	0.21035	0	0	0	0	0	N/A	Yes	0.321374	0	Yes	5.89765	-5.56545	1.72426	-3.22774	0.00124774	0.0190403	other	intronic	0	0	0	0	0	0	0	0	0	0	0	0	0	0
wt_saf_neg_peak_37031	chr12	100295232	100295394	-	163	11	6	1	0	0	0	0	2	Yes	0.296102	0.177697	0.0300501	0	0	0	0	0.132218	N/A	Yes	0.16795	0	Yes	3.07317	-4.62802	2.00147	-2.31231	0.0207606	0.138924	other	intronic	0	1	0	0	0	0	0	0	0	0	1	1	0	0
wt_saf_neg_peak_37053	chr12	100356580	100357375	-	796	35	59	50	86	15	23	0	4	Yes	0.942142	1.74735	1.5025	1.16716	0.455323	0.714082	0	0.264436	N/A	No	1.39733	0.584702	Yes	34.2078	-0.978206	0.483648	-2.02256	0.0431189	0.225787	protein_coding	intronic	0	0	0	0	0	0	0	0	0	0	0	0	0	0
wt_saf_neg_peak_37055	chr12	100360535	100360826	-	292	13	9	11	21	3	0	0	0	Yes	0.349938	0.266545	0.330551	0.285004	0.0910646	0	0	0	N/A	No	0.315678	0.0455323	Yes	6.46162	-2.52952	1.22648	-2.06242	0.0391677	0.212215	protein_coding	intronic	0	0	0	0	0	0	0	0	0	0	0	1	0	0
wt_saf_neg_peak_37163	chr12	100610668	100610850	-	183	14	12	16	12	4	2	0	4	Yes	0.376857	0.355393	0.480801	0.16286	0.121419	0.0620941	0	0.264436	N/A	Yes	0.40435	0.0917567	Yes	8.77685	-1.87386	0.948597	-1.9754	0.0482228	0.242191	protein_coding	intronic	0	0	0	1	0	0	0	0	0	0	0	0	0	0
wt_saf_neg_peak_37251	chr12	100979614	100979883	-	270	40	48	29	42	18	11	0	4	Yes	1.07673	1.42157	0.871452	0.570009	0.546387	0.341517	0	0.264436	N/A	No	1.12325	0.443952	Yes	27.0343	-1.06796	0.52431	-2.03688	0.0416621	0.220603	protein_coding	intronic	0	0	0	0	0	0	0	0	0	0	0	0	0	0
wt_saf_neg_peak_37393	chr12	102000785	102000901	-	117	6	7	2	10	0	0	0	0	Yes	0.16151	0.207313	0.0601001	0.135716	0	0	0	0	N/A	No	0.142974	0	Yes	2.60337	-4.38568	2.02374	-2.16711	0.0302263	NA	other	intronic	0	0	0	0	0	0	0	0	0	0	0	0	0	0
wt_saf_neg_peak_37457	chr12	102631071	102631159	-	89	21	14	15	3	3	2	0	1	Yes	0.565285	0.414626	0.450751	0.0407149	0.0910646	0.0620941	0	0.0661091	N/A	Yes	0.476887	0.0765793	Yes	9.88772	-2.37371	0.951449	-2.49484	0.0126015	0.100627	protein_coding	intronic	0	0	0	0	0	0	0	0	0	0	0	1	0	0
wt_saf_neg_peak_37506	chr12	102716951	102717332	-	382	9	12	9	6	0	2	0	0	Yes	0.242265	0.355393	0.270451	0.0814298	0	0.0620941	0	0	N/A	Yes	0.28937	0.031047	Yes	5.75809	-2.94816	1.37947	-2.13717	0.0325839	0.188116	lncRNA	intronic	0	0	0	0	0	0	0	0	0	0	0	0	0	0
wt_saf_neg_peak_37551	chr12	102823356	102823742	-	387	20	24	32	18	4	6	0	0	Yes	0.538367	0.710787	0.961602	0.244289	0.121419	0.186282	0	0	N/A	Yes	0.736919	0.153851	Yes	15.8119	-1.98861	0.734711	-2.70665	0.00679651	0.0662652	protein_coding	intronic	0	0	0	2	0	0	0	0	0	0	0	0	0	0
wt_saf_neg_peak_37576	chr12	103401365	103401462	-	98	15	14	1	2	1	0	0	0	Yes	0.403775	0.414626	0.0300501	0.0271433	0.0303548	0	0	0	N/A	Yes	0.282817	0.0151774	Yes	5.36424	-3.93286	1.80784	-2.17545	0.0295966	0.176567	other	intronic	0	0	1	0	0	0	0	0	0	0	0	0	0	0
wt_saf_neg_peak_37689	chr12	105148909	105149154	-	246	29	48	12	25	3	2	0	0	Yes	0.780632	1.42157	0.360601	0.339291	0.0910646	0.0620941	0	0	N/A	Yes	0.854269	0.0765793	Yes	16.6334	-3.19792	0.902382	-3.54386	0.000394311	0.00769805	other	intronic	0	0	1	0	0	0	0	0	0	0	1	0	0	0
wt_saf_neg_peak_37691	chr12	105198604	105198728	-	125	6	4	7	3	0	0	0	3	Yes	0.16151	0.118465	0.21035	0.0407149	0	0	0	0.198327	N/A	Yes	0.163442	0	Yes	3.01155	-4.59089	1.93843	-2.36836	0.0178673	0.126175	other	intronic	0	1	0	0	0	0	0	0	0	0	0	0	0	0
wt_saf_neg_peak_37886	chr12	108778975	108779282	-	308	27	50	29	7	5	3	0	4	Yes	0.726795	1.48081	0.871452	0.0950014	0.151774	0.0931411	0	0.264436	N/A	Yes	1.02635	0.122458	Yes	20.5039	-2.78875	0.732487	-3.80723	0.000140533	0.00329473	other	intronic	0	0	0	0	0	0	0	0	0	0	0	0	0	0
wt_saf_neg_peak_37894	chr12	108808264	108808626	-	363	16	24	11	7	2	4	0	1	Yes	0.430693	0.710787	0.330551	0.0950014	0.0607097	0.124188	0	0.0661091	N/A	Yes	0.490677	0.0924489	Yes	10.3119	-2.12904	0.92191	-2.30938	0.0209228	0.139619	other	intronic	0	0	0	0	0	0	0	0	0	0	0	0	0	0
wt_saf_neg_peak_37924	chr12	109043363	109043626	-	264	16	11	4	3	0	1	0	0	Yes	0.430693	0.325777	0.1202	0.0407149	0	0.031047	0	0	N/A	Yes	0.292224	0.0155235	Yes	5.57913	-3.97747	1.73484	-2.29269	0.0218656	0.143805	protein_coding	intronic	0	0	0	0	0	0	0	0	0	0	0	0	0	0
wt_saf_neg_peak_37928	chr12	109049530	109049639	-	110	6	12	3	7	0	0	0	0	Yes	0.16151	0.355393	0.0901502	0.0950014	0	0	0	0	N/A	No	0.202351	0	Yes	3.66909	-4.87918	1.88954	-2.58221	0.00981703	0.0853426	protein_coding	intronic	0	0	0	0	0	0	0	0	0	0	0	0	0	0
wt_saf_neg_peak_37931	chr12	109055364	109055793	-	430	15	6	8	18	0	2	0	0	Yes	0.403775	0.177697	0.2404	0.244289	0	0.0620941	0	0	N/A	No	0.273957	0.031047	Yes	5.51576	-2.88261	1.40962	-2.04496	0.040859	0.217873	protein_coding	intronic	0	0	0	0	0	0	0	0	0	0	0	0	0	0
wt_saf_neg_peak_37973	chr12	109576397	109576766	-	370	7	24	10	27	3	1	0	3	Yes	0.188428	0.710787	0.300501	0.366434	0.0910646	0.031047	0	0.198327	N/A	No	0.399905	0.0610558	Yes	8.14486	-2.42694	1.10866	-2.18906	0.0285922	0.172593	other	intronic	0	0	0	0	0	0	0	0	0	0	0	0	0	0
wt_saf_neg_peak_38001	chr12	109696313	109696746	-	434	28	41	13	6	6	6	0	1	Yes	0.753713	1.21426	0.390651	0.0814298	0.182129	0.186282	0	0.0661091	N/A	Yes	0.786208	0.184206	Yes	17.0154	-1.8145	0.725203	-2.50206	0.0123472	0.0993869	other	intronic	0	0	0	0	0	0	0	0	0	0	3	0	0	0
wt_saf_neg_peak_38051	chr12	110462432	110462990	-	559	7	12	6	6	0	0	0	0	Yes	0.188428	0.355393	0.1803	0.0814298	0	0	0	0	N/A	Yes	0.241374	0	Yes	4.39683	-5.13872	1.8037	-2.84899	0.00438577	0.0486293	other	intronic	0	0	0	0	0	0	0	0	0	0	0	1	0	0
wt_saf_neg_peak_38059	chr12	110498056	110498355	-	300	4	5	6	2	0	0	0	2	Yes	0.107673	0.148081	0.1803	0.0271433	0	0	0	0.132218	N/A	Yes	0.145351	0	Yes	2.66717	-4.41486	1.9898	-2.21874	0.0265041	NA	other	intronic	0	0	0	0	0	0	0	0	0	0	0	0	0	0
wt_saf_neg_peak_38264	chr12	111871113	111871405	-	293	15	9	6	0	1	0	0	4	Yes	0.403775	0.266545	0.1803	0	0.0303548	0	0	0.264436	N/A	Yes	0.28354	0.0151774	Yes	5.42096	-3.94632	1.72675	-2.2854	0.0222892	0.145661	protein_coding	intronic	0	0	0	0	0	0	0	0	0	0	0	1	0	0
wt_saf_neg_peak_38308	chr12	112708431	112709011	-	581	13	14	10	0	0	0	0	1	Yes	0.349938	0.414626	0.300501	0	0	0	0	0.0661091	N/A	Yes	0.355021	0	Yes	6.49571	-5.70211	1.6893	-3.37544	0.00073699	0.0126818	other	intronic	0	0	1	1	0	0	0	0	0	0	1	2	0	0
wt_saf_neg_peak_38336	chr12	112887615	112887829	-	215	8	6	1	1	0	0	0	4	Yes	0.215347	0.177697	0.0300501	0.0135716	0	0	0	0.264436	N/A	Yes	0.141031	0	Yes	2.57361	-4.37134	2.06559	-2.11626	0.0343224	NA	other	intronic	0	0	0	3	0	0	0	0	0	0	0	0	0	0
wt_saf_neg_peak_38393	chr12	113149160	113149331	-	172	5	10	1	0	0	0	0	4	Yes	0.134592	0.296161	0.0300501	0	0	0	0	0.264436	N/A	Yes	0.153601	0	Yes	2.77696	-4.47859	2.04482	-2.19022	0.0285086	NA	other	intronic	0	0	1	1	0	0	0	0	0	0	0	0	0	0
wt_saf_neg_peak_38444	chr12	116363023	116363624	-	602	18	10	4	9	0	0	0	2	Yes	0.48453	0.296161	0.1202	0.122145	0	0	0	0.132218	N/A	Yes	0.300297	0	Yes	5.50294	-5.46714	1.76554	-3.09659	0.00195759	0.0268378	other	intronic	0	0	0	0	0	0	0	0	0	0	0	2	0	0
wt_saf_neg_peak_38499	chr12	119222663	119223078	-	416	8	3	13	13	0	0	0	0	Yes	0.215347	0.0888484	0.390651	0.176431	0	0	0	0	N/A	No	0.231615	0	Yes	4.29131	-5.09991	1.84374	-2.76607	0.00567368	0.0584554	protein_coding	intronic	0	2	0	0	0	0	0	0	0	0	0	0	0	0
wt_saf_neg_peak_38571	chr13	5802654	5803041	-	388	7	13	4	23	0	0	0	1	Yes	0.188428	0.38501	0.1202	0.312148	0	0	0	0.0661091	N/A	No	0.231213	0	Yes	4.19841	-5.07333	1.83407	-2.76616	0.00567212	0.0584554	other	intronic	0	0	0	0	0	0	0	0	0	0	0	1	0	0
wt_saf_neg_peak_38611	chr13	6869469	6869682	-	214	12	6	2	0	0	0	0	0	Yes	0.32302	0.177697	0.0601001	0	0	0	0	0	N/A	Yes	0.186939	0	Yes	3.42676	-4.78464	1.92935	-2.47993	0.0131409	0.103378	other	intronic	0	0	0	0	0	0	0	0	0	0	0	2	0	0
wt_saf_neg_peak_38612	chr13	6871136	6871551	-	416	1	8	7	2	0	0	0	4	Yes	0.0269183	0.236929	0.21035	0.0271433	0	0	0	0.264436	N/A	Yes	0.158066	0	Yes	2.88187	-4.52431	2.02678	-2.23227	0.0255971	NA	other	intronic	0	2	0	0	0	0	0	0	0	0	0	1	0	0
wt_saf_neg_peak_38620	chr13	7139036	7139409	-	374	11	8	15	19	1	2	0	3	Yes	0.296102	0.236929	0.450751	0.257861	0.0303548	0.0620941	0	0.198327	N/A	No	0.327927	0.0462245	Yes	6.72982	-2.56166	1.19339	-2.14655	0.0318295	0.185224	lncRNA	exonic	0	0	0	0	1	0	0	0	0	0	0	0	0	0
wt_saf_neg_peak_38697	chr13	9322826	9323340	-	515	14	14	11	7	1	4	0	4	Yes	0.376857	0.414626	0.330551	0.0950014	0.0303548	0.124188	0	0.264436	N/A	Yes	0.374011	0.0772715	Yes	8.00246	-2.00166	1.018	-1.96626	0.0492689	0.245631	other	intronic	0	1	0	1	0	0	0	0	0	0	0	0	0	0
wt_saf_neg_peak_38722	chr13	9716766	9716848	-	83	4	9	7	2	0	0	0	0	Yes	0.107673	0.266545	0.21035	0.0271433	0	0	0	0	N/A	Yes	0.194856	0	Yes	3.55716	-4.83036	1.88043	-2.56876	0.0102064	0.0875416	protein_coding	intronic	0	0	0	0	0	0	0	0	0	0	0	0	0	0
wt_saf_neg_peak_38723	chr13	9719368	9719442	-	75	1	7	5	5	0	0	0	0	Yes	0.0269183	0.207313	0.15025	0.0678582	0	0	0	0	N/A	Yes	0.128161	0	Yes	2.33199	-4.21958	2.11654	-1.99362	0.0461932	NA	protein_coding	intronic	0	0	0	0	0	0	0	0	0	0	0	0	0	0
wt_saf_neg_peak_38750	chr13	10082609	10082706	-	98	8	2	5	0	0	0	0	2	Yes	0.215347	0.0592322	0.15025	0	0	0	0	0.132218	N/A	Yes	0.14161	0	Yes	2.61899	-4.39269	2.02652	-2.1676	0.0301891	NA	protein_coding	intronic	0	0	1	0	0	0	0	0	0	0	0	0	0	0
wt_saf_neg_peak_38794	chr13	11676788	11676993	-	206	6	3	6	0	0	0	0	0	Yes	0.16151	0.0888484	0.1803	0	0	0	0	0	N/A	Yes	0.143553	0	Yes	2.64875	-4.40644	1.99999	-2.20323	0.0275785	NA	protein_coding	intronic	0	0	0	0	0	0	0	0	0	0	0	0	0	0
wt_saf_neg_peak_38852	chr13	11823545	11823748	-	204	9	8	11	8	0	2	0	0	Yes	0.242265	0.236929	0.330551	0.108573	0	0.0620941	0	0	N/A	Yes	0.269915	0.031047	Yes	5.42932	-2.85366	1.39909	-2.03965	0.0413852	0.21964	protein_coding	intronic	0	0	0	1	0	0	0	0	0	0	0	0	0	0
wt_saf_neg_peak_38858	chr13	11846890	11847409	-	520	9	14	4	0	0	0	0	1	Yes	0.242265	0.414626	0.1202	0	0	0	0	0.0661091	N/A	Yes	0.25903	0	Yes	4.70718	-5.23908	1.79966	-2.91114	0.00360109	0.0423198	protein_coding	intronic	0	0	0	0	0	0	0	0	0	0	0	2	0	0
wt_saf_neg_peak_38883	chr13	11914180	11914517	-	338	3	12	5	0	0	0	0	2	Yes	0.080755	0.355393	0.15025	0	0	0	0	0.132218	N/A	Yes	0.195466	0	Yes	3.54368	-4.82594	1.90889	-2.52814	0.0114669	0.0946576	protein_coding	intronic	0	1	0	0	0	0	0	0	0	0	0	0	0	0
wt_saf_neg_peak_38904	chr13	11980106	11980303	-	198	2	9	5	0	0	0	0	0	Yes	0.0538367	0.266545	0.15025	0	0	0	0	0	N/A	Yes	0.156877	0	Yes	2.84997	-4.51044	1.99873	-2.25665	0.0240297	NA	protein_coding	intronic	0	0	0	1	0	0	0	0	0	0	0	1	0	0
wt_saf_neg_peak_38929	chr13	12034580	12034934	-	355	6	18	12	0	2	1	0	1	Yes	0.16151	0.53309	0.360601	0	0.0607097	0.031047	0	0.0661091	N/A	Yes	0.351734	0.0458784	Yes	7.07895	-2.65725	1.20155	-2.21151	0.0270003	0.16599	protein_coding	intronic	0	1	0	0	0	0	0	0	0	0	0	0	0	0
wt_saf_neg_peak_38961	chr13	12174283	12174488	-	206	7	5	2	0	0	0	0	0	Yes	0.188428	0.148081	0.0601001	0	0	0	0	0	N/A	Yes	0.132203	0	Yes	2.41843	-4.28042	2.05664	-2.08127	0.0374089	NA	other	intronic	0	0	0	0	0	0	0	0	0	0	0	0	0	0
wt_saf_neg_peak_38965	chr13	12178275	12178360	-	86	8	7	8	6	0	0	0	0	Yes	0.215347	0.207313	0.2404	0.0814298	0	0	0	0	N/A	Yes	0.22102	0	Yes	4.05885	-5.02241	1.81855	-2.76177	0.00574892	0.0590063	other	exonic	0	0	0	0	0	0	0	0	0	0	0	0	0	0
wt_saf_neg_peak_39057	chr13	13347513	13348124	-	612	12	19	7	7	0	1	0	0	Yes	0.32302	0.562706	0.21035	0.0950014	0	0.031047	0	0	N/A	Yes	0.365359	0.0155235	Yes	6.88011	-4.28951	1.67649	-2.55863	0.0105084	0.0892286	other	intronic	0	0	0	0	0	0	0	0	0	0	1	1	0	0
wt_saf_neg_peak_39068	chr13	13370028	13370365	-	338	5	5	5	21	0	0	0	4	Yes	0.134592	0.148081	0.15025	0.285004	0	0	0	0.264436	N/A	No	0.144308	0	Yes	2.64661	-4.40554	1.988	-2.21607	0.0266867	NA	protein_coding	intronic	0	0	0	0	0	0	0	0	0	0	0	0	0	0
wt_saf_neg_peak_39137	chr13	14519052	14519743	-	692	14	5	10	10	0	0	0	0	Yes	0.376857	0.148081	0.300501	0.135716	0	0	0	0	N/A	Yes	0.275146	0	Yes	5.08066	-5.34794	1.76967	-3.02199	0.00251116	0.0323251	protein_coding	intronic	0	0	0	0	0	0	0	0	0	0	1	0	0	0
wt_saf_neg_peak_39153	chr13	17223032	17223544	-	513	13	5	2	7	0	0	0	0	Yes	0.349938	0.148081	0.0601001	0.0950014	0	0	0	0	N/A	No	0.18604	0	Yes	3.41755	-4.78121	1.93845	-2.4665	0.0136439	0.105966	protein_coding	intronic	0	2	0	1	0	0	0	0	0	0	0	0	0	0
wt_saf_neg_peak_39154	chr13	17673342	17673708	-	367	5	7	6	15	0	0	0	0	Yes	0.134592	0.207313	0.1803	0.203574	0	0	0	0	N/A	No	0.174068	0	Yes	3.18515	-4.6721	1.9106	-2.44536	0.0144709	0.110187	protein_coding	intronic	0	1	0	0	0	0	0	0	0	0	0	0	0	0
wt_saf_neg_peak_39166	chr13	17706275	17706534	-	260	8	16	11	25	0	2	0	2	Yes	0.215347	0.473858	0.330551	0.339291	0	0.0620941	0	0.132218	N/A	No	0.339918	0.031047	Yes	6.66864	-3.17715	1.34852	-2.35604	0.0184711	0.128781	other	intronic	0	0	0	0	0	0	0	0	0	0	0	0	0	0
wt_saf_neg_peak_39167	chr13	17708988	17709150	-	163	18	6	8	7	1	0	0	3	Yes	0.48453	0.177697	0.2404	0.0950014	0.0303548	0	0	0.198327	N/A	Yes	0.300876	0.0151774	Yes	5.76748	-4.0391	1.72287	-2.34441	0.0190574	0.131448	other	exonic	0	0	0	1	0	0	0	0	0	0	0	0	0	0
wt_saf_neg_peak_39249	chr13	18149490	18150387	-	898	8	19	13	0	0	0	0	0	Yes	0.215347	0.562706	0.390651	0	0	0	0	0	N/A	Yes	0.389568	0	Yes	7.10297	-5.82853	1.68665	-3.45568	0.000548909	0.0100373	protein_coding	intronic	0	0	0	0	0	0	0	0	0	0	0	0	0	0
wt_saf_neg_peak_39260	chr13	18371555	18371707	-	153	3	7	6	0	0	0	0	0	Yes	0.080755	0.207313	0.1803	0	0	0	0	0	N/A	Yes	0.156123	0	Yes	2.85211	-4.51113	1.97209	-2.28749	0.0221672	NA	other	intronic	0	0	0	0	0	0	0	0	0	0	0	0	0	0
wt_saf_neg_peak_39338	chr13	20500075	20500494	-	420	16	27	13	5	2	1	0	1	Yes	0.430693	0.799635	0.390651	0.0678582	0.0607097	0.031047	0	0.0661091	N/A	Yes	0.540326	0.0458784	Yes	10.5128	-3.27826	1.09138	-3.00378	0.0026665	0.0338198	other	intronic	0	0	0	0	0	0	0	0	0	0	0	0	0	0
wt_saf_neg_peak_39405	chr13	21896869	21896992	-	124	14	19	11	12	0	2	0	0	Yes	0.376857	0.562706	0.330551	0.16286	0	0.0620941	0	0	N/A	Yes	0.423371	0.031047	Yes	8.19494	-3.49882	1.28925	-2.71385	0.0066507	0.0652909	other	exonic	0	0	0	0	0	0	0	0	0	0	0	0	0	0
wt_saf_neg_peak_39407	chr13	21936957	21937082	-	126	9	6	15	19	1	0	0	0	Yes	0.242265	0.177697	0.450751	0.257861	0.0303548	0	0	0	N/A	No	0.290238	0.0151774	Yes	5.57833	-3.982	1.727	-2.30574	0.0211251	0.140545	other	intronic	0	0	0	0	0	0	0	0	0	0	0	0	0	0
wt_saf_neg_peak_39409	chr13	21993928	21994398	-	471	16	11	14	4	3	1	0	1	Yes	0.430693	0.325777	0.420701	0.0542865	0.0910646	0.031047	0	0.0661091	N/A	Yes	0.39239	0.0610558	Yes	8.10736	-2.41957	1.06066	-2.28119	0.022537	0.146781	other	intronic	0	0	0	0	0	0	0	0	0	0	0	0	0	0
wt_saf_neg_peak_39422	chr13	22201487	22201817	-	331	8	1	5	0	0	0	0	0	Yes	0.215347	0.0296161	0.15025	0	0	0	0	0	N/A	Yes	0.131738	0	Yes	2.44326	-4.29246	2.09349	-2.05039	0.0403266	NA	other	intronic	0	0	0	1	0	0	0	0	0	0	0	0	0	0
wt_saf_neg_peak_39448	chr13	23425510	23425679	-	170	25	47	41	22	10	11	0	2	Yes	0.672958	1.39196	1.23205	0.298576	0.303548	0.341517	0	0.132218	N/A	Yes	1.09899	0.322533	Yes	24.8524	-1.49171	0.575333	-2.59278	0.00952025	0.0835293	other	intronic	0	0	0	0	0	0	0	0	0	0	0	0	0	0
wt_saf_neg_peak_39564	chr13	24182898	24183056	-	159	19	8	3	0	0	1	0	0	Yes	0.511448	0.236929	0.0901502	0	0	0.031047	0	0	N/A	Yes	0.279509	0.0155235	Yes	5.36443	-3.91916	1.76841	-2.21621	0.0266772	0.164622	protein_coding	intronic	0	0	0	0	0	0	0	0	0	0	0	0	0	0
wt_saf_neg_peak_39693	chr13	25263311	25263473	-	163	5	8	6	0	0	0	0	1	Yes	0.134592	0.236929	0.1803	0	0	0	0	0.0661091	N/A	Yes	0.18394	0	Yes	3.36088	-4.74969	1.89174	-2.51076	0.0120473	0.0978103	protein_coding	intronic	0	0	0	0	0	0	0	0	0	0	0	1	0	0
wt_saf_neg_peak_39728	chr13	28483871	28484131	-	261	18	5	16	5	0	1	0	0	Yes	0.48453	0.148081	0.480801	0.0678582	0	0.031047	0	0	N/A	Yes	0.371137	0.0155235	Yes	7.10269	-4.33499	1.68488	-2.57288	0.0100855	0.0868132	lncRNA	intronic	0	1	0	0	0	0	0	0	0	0	0	0	0	0
wt_saf_neg_peak_39738	chr13	28502784	28503419	-	636	29	18	24	59	4	9	0	2	Yes	0.780632	0.53309	0.721202	0.800727	0.121419	0.279423	0	0.132218	N/A	No	0.678308	0.200421	Yes	15.4601	-1.49134	0.709333	-2.10245	0.035514	0.199116	lncRNA	intronic	0	0	0	1	0	0	0	0	0	0	0	0	0	0
wt_saf_neg_peak_39743	chr13	28512191	28512390	-	200	16	9	16	25	3	0	0	4	Yes	0.430693	0.266545	0.480801	0.339291	0.0910646	0	0	0.264436	N/A	No	0.39268	0.0455323	Yes	7.89655	-2.84564	1.17624	-2.41926	0.0155519	0.115355	lncRNA	intronic	0	0	0	0	0	0	0	0	0	0	0	2	0	0
wt_saf_neg_peak_39749	chr13	28522421	28523748	-	1328	76	38	44	46	22	8	0	3	Yes	2.04579	1.12541	1.3222	0.624295	0.667807	0.248376	0	0.198327	N/A	Yes	1.4978	0.458092	Yes	34.254	-1.4521	0.522268	-2.78037	0.00542969	0.0566075	lncRNA	intronic	0	0	0	0	0	0	0	0	0	0	1	0	0	0
wt_saf_neg_peak_39752	chr13	28530354	28530641	-	288	41	13	19	21	6	2	0	1	Yes	1.10365	0.38501	0.570951	0.285004	0.182129	0.0620941	0	0.0661091	N/A	Yes	0.686538	0.122112	Yes	14.4482	-2.23631	0.832538	-2.68614	0.00722829	0.0691694	lncRNA	intronic	0	1	0	0	0	0	0	0	0	0	0	0	0	0
wt_saf_neg_peak_39760	chr13	28545526	28546023	-	498	39	29	32	29	14	9	0	4	Yes	1.04981	0.858867	0.961602	0.393577	0.424968	0.279423	0	0.264436	N/A	Yes	0.956762	0.352196	Yes	22.7465	-1.17733	0.561643	-2.09623	0.0360622	0.201161	lncRNA	intronic	0	0	0	0	0	0	0	0	0	0	0	0	0	0
wt_saf_neg_peak_39768	chr13	28563611	28563700	-	90	18	6	9	1	0	0	0	0	Yes	0.48453	0.177697	0.270451	0.0135716	0	0	0	0	N/A	Yes	0.310892	0	Yes	5.7354	-5.52458	1.74152	-3.17228	0.00151249	0.0220479	lncRNA	intronic	0	0	0	0	0	0	0	0	0	0	0	1	0	0
wt_saf_neg_peak_39780	chr13	28587898	28587999	-	102	20	6	5	29	0	1	0	2	Yes	0.538367	0.177697	0.15025	0.393577	0	0.031047	0	0.132218	N/A	No	0.288771	0.0155235	Yes	5.55364	-3.97107	1.7496	-2.2697	0.0232259	0.149875	lncRNA	intronic	0	0	0	0	0	0	0	0	0	0	0	0	0	0
wt_saf_neg_peak_39784	chr13	28593359	28593557	-	199	33	10	16	23	4	3	0	0	Yes	0.888305	0.296161	0.480801	0.312148	0.121419	0.0931411	0	0	N/A	No	0.555089	0.10728	Yes	11.8228	-2.11517	0.884798	-2.39057	0.0168223	0.121619	lncRNA	intronic	0	0	0	0	0	0	0	0	0	0	0	0	0	0
wt_saf_neg_peak_39790	chr13	28600600	28600968	-	369	28	27	21	23	5	6	0	0	Yes	0.753713	0.799635	0.631051	0.312148	0.151774	0.186282	0	0	N/A	Yes	0.728133	0.169028	Yes	15.8326	-1.83609	0.704853	-2.60493	0.00918932	0.0815174	lncRNA	intronic	0	0	0	0	0	0	0	0	0	0	0	0	0	0
wt_saf_neg_peak_39812	chr13	28644184	28644328	-	145	12	19	15	40	2	4	0	0	Yes	0.32302	0.562706	0.450751	0.542865	0.0607097	0.124188	0	0	N/A	No	0.445492	0.0924489	Yes	9.51552	-1.99158	0.932149	-2.13655	0.0326347	0.188261	lncRNA	intronic	0	0	0	1	0	0	0	0	0	0	0	0	0	0
wt_saf_neg_peak_39828	chr13	28676874	28677077	-	204	20	12	13	12	5	1	0	0	Yes	0.538367	0.355393	0.390651	0.16286	0.151774	0.031047	0	0	N/A	Yes	0.428137	0.0914107	Yes	9.20041	-1.967	0.957886	-2.05348	0.0400264	0.215231	lncRNA	intronic	0	0	0	0	0	0	0	0	0	0	0	0	0	0
wt_saf_neg_peak_39841	chr13	28699909	28700348	-	440	25	19	25	38	3	5	0	1	Yes	0.672958	0.562706	0.751252	0.515722	0.0910646	0.155235	0	0.0661091	N/A	No	0.662305	0.12315	Yes	14.0037	-2.16	0.784139	-2.75461	0.00587627	0.0598709	lncRNA	intronic	0	0	0	0	0	0	0	0	0	0	0	0	0	0
wt_saf_neg_peak_39842	chr13	28702064	28702282	-	219	42	18	21	27	7	2	0	1	Yes	1.13057	0.53309	0.631051	0.366434	0.212484	0.0620941	0	0.0661091	N/A	No	0.764904	0.137289	Yes	16.0866	-2.22027	0.777314	-2.85634	0.00428563	0.047879	lncRNA	intronic	0	0	0	1	0	0	0	0	0	0	0	0	0	0
wt_saf_neg_peak_39843	chr13	28702813	28703093	-	281	11	17	17	21	5	1	0	4	Yes	0.296102	0.503474	0.510851	0.285004	0.151774	0.031047	0	0.264436	N/A	No	0.436809	0.0914107	Yes	9.32868	-1.98617	0.958008	-2.07323	0.0381513	0.208543	lncRNA	intronic	0	0	0	0	0	0	0	0	0	0	0	1	0	0
wt_saf_neg_peak_39851	chr13	28715372	28715605	-	234	12	14	14	11	3	2	0	2	Yes	0.32302	0.414626	0.420701	0.149288	0.0910646	0.0620941	0	0.132218	N/A	Yes	0.386116	0.0765793	Yes	8.20196	-2.06317	0.997388	-2.06857	0.0385863	0.210112	lncRNA	intronic	0	0	0	0	0	0	0	0	0	0	0	0	0	0
wt_saf_neg_peak_39877	chr13	28754999	28755164	-	166	9	20	30	44	4	6	0	1	Yes	0.242265	0.592322	0.901502	0.597152	0.121419	0.186282	0	0.0661091	N/A	No	0.578696	0.153851	Yes	12.9031	-1.63622	0.825314	-1.98254	0.0474183	0.239577	lncRNA	intronic	0	0	0	0	0	0	0	0	1	0	0	1	0	0
wt_saf_neg_peak_39885	chr13	28767861	28769097	-	1237	107	61	77	101	38	30	0	2	Yes	2.88026	1.80658	2.31386	1.37074	1.15348	0.931411	0	0.132218	N/A	No	2.33357	1.04245	Yes	58.2749	-0.900496	0.374741	-2.40298	0.016262	0.118867	lncRNA	intronic	0	1	1	0	0	0	0	0	0	0	0	2	0	0
wt_saf_neg_peak_39899	chr13	28791058	28791133	-	76	6	8	11	0	0	0	0	0	Yes	0.16151	0.236929	0.330551	0	0	0	0	0	N/A	Yes	0.242997	0	Yes	4.46277	-5.15664	1.79868	-2.8669	0.00414509	0.0467262	lncRNA	intronic	0	0	0	0	0	0	0	0	0	0	0	0	0	0
wt_saf_neg_peak_39912	chr13	28814239	28815057	-	819	82	70	96	84	40	13	0	2	Yes	2.2073	2.07313	2.88481	1.14002	1.21419	0.403612	0	0.132218	N/A	No	2.38841	0.808903	Yes	55.7167	-1.30226	0.427372	-3.04713	0.00231038	0.0303416	lncRNA	intronic	0	0	0	0	0	0	0	0	0	0	0	1	0	0
wt_saf_neg_peak_39917	chr13	28824184	28824557	-	374	36	21	31	42	11	9	0	2	Yes	0.96906	0.621938	0.931552	0.570009	0.333903	0.279423	0	0.132218	N/A	No	0.84085	0.306663	Yes	19.9966	-1.19266	0.604874	-1.97176	0.0486372	0.243565	lncRNA	intronic	0	0	0	0	0	0	0	0	0	0	0	0	0	0
wt_saf_neg_peak_39959	chr13	29211327	29211563	-	237	9	7	3	1	0	0	0	0	Yes	0.242265	0.207313	0.0901502	0.0135716	0	0	0	0	N/A	Yes	0.179909	0	Yes	3.29	-4.72388	1.91446	-2.46747	0.0136071	0.10577	other	intronic	0	1	0	0	0	0	0	0	0	0	0	1	0	0
wt_saf_neg_peak_39988	chr13	29363972	29364060	-	89	5	7	7	0	0	0	0	2	Yes	0.134592	0.207313	0.21035	0	0	0	0	0.132218	N/A	Yes	0.184085	0	Yes	3.37222	-4.75372	1.88944	-2.51594	0.0118716	0.0968651	protein_coding	intronic	0	0	0	0	0	0	0	0	0	0	0	0	0	0
wt_saf_neg_peak_39991	chr13	29367025	29367347	-	323	20	15	28	8	0	6	0	1	Yes	0.538367	0.444242	0.841402	0.108573	0	0.186282	0	0.0661091	N/A	Yes	0.608003	0.0931411	Yes	12.6054	-2.43751	0.921646	-2.64474	0.00817543	0.0753139	protein_coding	intronic	1	0	1	0	0	0	0	0	0	0	0	1	0	0
wt_saf_neg_peak_40316	chr13	30867096	30867447	-	352	5	14	13	10	2	1	0	0	Yes	0.134592	0.414626	0.390651	0.135716	0.0607097	0.031047	0	0	N/A	Yes	0.313289	0.0458784	Yes	6.39659	-2.49366	1.23005	-2.02729	0.0426327	0.224128	protein_coding	intronic	0	0	0	0	0	0	0	0	0	0	0	0	0	0
wt_saf_neg_peak_40325	chr13	30892370	30892557	-	188	6	8	19	8	2	0	0	0	Yes	0.16151	0.236929	0.570951	0.108573	0.0607097	0	0	0	N/A	Yes	0.32313	0.0303548	Yes	6.39768	-3.14383	1.39775	-2.24921	0.0244991	0.15544	protein_coding	intronic	0	0	0	1	0	0	0	0	0	0	0	0	0	0
wt_saf_neg_peak_40372	chr13	31841698	31842020	-	323	2	6	7	5	0	0	0	0	Yes	0.0538367	0.177697	0.21035	0.0678582	0	0	0	0	N/A	Yes	0.147295	0	Yes	2.69693	-4.42857	2.01556	-2.19719	0.0280068	NA	protein_coding	intronic	0	0	0	0	0	0	0	0	0	0	0	0	0	0
wt_saf_neg_peak_40451	chr13	32155759	32155844	-	86	7	2	6	9	0	0	0	4	Yes	0.188428	0.0592322	0.1803	0.122145	0	0	0	0.264436	N/A	No	0.142654	0	Yes	2.63954	-4.40219	2.02046	-2.1788	0.0293464	NA	protein_coding	intronic	0	1	0	0	0	0	0	0	0	0	0	0	0	0
wt_saf_neg_peak_40496	chr13	32293478	32293600	-	123	7	8	0	8	0	0	0	0	Yes	0.188428	0.236929	0	0.108573	0	0	0	0	N/A	No	0.141786	0	Yes	2.57147	-4.36948	2.17334	-2.01049	0.0443796	NA	protein_coding	intronic	0	0	0	0	0	0	0	0	0	0	0	0	0	0
wt_saf_neg_peak_40585	chr13	34188793	34189182	-	390	7	12	10	16	0	1	0	0	Yes	0.188428	0.355393	0.300501	0.217146	0	0.031047	0	0	N/A	No	0.281441	0.0155235	Yes	5.37863	-3.91582	1.72139	-2.2748	0.0229179	0.148489	protein_coding	intronic	1	0	0	0	0	0	0	0	0	0	0	0	0	0
wt_saf_neg_peak_40596	chr13	34212533	34212807	-	275	19	15	12	2	2	0	0	2	Yes	0.511448	0.444242	0.360601	0.0271433	0.0607097	0	0	0.132218	N/A	Yes	0.438764	0.0303548	Yes	8.48302	-3.58028	1.28196	-2.79282	0.005225	0.0551309	protein_coding	intronic	0	0	0	0	0	0	0	0	0	0	0	0	0	0
wt_saf_neg_peak_40607	chr13	34240033	34240294	-	262	7	8	7	2	0	0	0	0	Yes	0.188428	0.236929	0.21035	0.0271433	0	0	0	0	N/A	Yes	0.211903	0	Yes	3.88099	-4.95788	1.83374	-2.70371	0.00685707	0.0666555	protein_coding	intronic	0	0	0	1	0	0	0	0	0	0	0	0	0	0
wt_saf_neg_peak_40614	chr13	34258606	34258682	-	77	7	1	6	4	0	0	0	3	Yes	0.188428	0.0296161	0.1803	0.0542865	0	0	0	0.198327	N/A	Yes	0.132782	0	Yes	2.46381	-4.30274	2.08707	-2.06162	0.0392441	NA	protein_coding	intronic	0	0	0	0	0	0	0	0	0	0	0	0	0	0
wt_saf_neg_peak_40807	chr13	37433470	37433553	-	84	12	10	1	0	0	0	0	1	Yes	0.32302	0.296161	0.0300501	0	0	0	0	0.0661091	N/A	Yes	0.21641	0	Yes	3.9426	-4.9864	1.91372	-2.6056	0.0091713	0.0814121	lncRNA	intronic	0	0	0	1	0	0	0	0	0	0	1	0	0	0
wt_saf_neg_peak_40897	chr13	38812771	38813389	-	619	9	19	15	5	0	0	0	1	Yes	0.242265	0.562706	0.450751	0.0678582	0	0	0	0.0661091	N/A	Yes	0.418574	0	Yes	7.64364	-5.93409	1.66827	-3.55703	0.000375067	0.00739451	lncRNA	intronic	0	0	0	1	0	0	0	0	0	0	0	0	0	0
wt_saf_neg_peak_40979	chr13	41311715	41312089	-	375	7	8	5	3	0	0	0	2	Yes	0.188428	0.236929	0.15025	0.0407149	0	0	0	0.132218	N/A	Yes	0.191869	0	Yes	3.50684	-4.81311	1.8732	-2.56946	0.0101857	0.0874216	protein_coding	exonic	0	0	0	0	0	0	0	0	0	0	0	0	0	0
wt_saf_neg_peak_40998	chr13	43193501	43193857	-	357	7	7	10	1	0	0	0	1	Yes	0.188428	0.207313	0.300501	0.0135716	0	0	0	0.0661091	N/A	Yes	0.232081	0	Yes	4.26648	-5.09265	1.80756	-2.81742	0.0048411	0.052259	other	intronic	0	0	0	0	0	0	0	0	0	0	0	0	0	0
wt_saf_neg_peak_41133	chr13	44710436	44710551	-	116	4	5	9	6	0	0	0	3	Yes	0.107673	0.148081	0.270451	0.0814298	0	0	0	0.198327	N/A	No	0.175401	0	Yes	3.22839	-4.68844	1.92183	-2.43957	0.0147048	0.111324	other	intronic	0	0	0	0	0	0	0	0	0	0	0	1	0	0
wt_saf_neg_peak_41135	chr13	44723093	44724241	-	1149	26	19	19	2	2	5	0	2	Yes	0.699877	0.562706	0.570951	0.0271433	0.0607097	0.155235	0	0.132218	N/A	Yes	0.611178	0.107972	Yes	12.8286	-2.23314	0.83008	-2.69027	0.00713943	0.0685162	other	intronic	0	0	1	0	0	0	0	0	0	0	0	4	0	0
wt_saf_neg_peak_41136	chr13	44724580	44725060	-	481	12	10	11	5	2	0	0	0	Yes	0.32302	0.296161	0.330551	0.0678582	0.0607097	0	0	0	N/A	Yes	0.316577	0.0303548	Yes	6.25167	-3.11222	1.35742	-2.29275	0.0218627	0.143804	other	intronic	0	0	0	0	0	0	0	0	0	0	0	1	0	0
wt_saf_neg_peak_41220	chr13	45645201	45645377	-	177	13	19	8	5	3	1	0	0	Yes	0.349938	0.562706	0.2404	0.0678582	0.0910646	0.031047	0	0	N/A	Yes	0.384348	0.0610558	Yes	7.89118	-2.37776	1.08428	-2.19294	0.0283114	0.171436	protein_coding	intronic	0	0	0	0	0	0	0	0	0	0	0	0	0	0
wt_saf_neg_peak_41255	chr13	45731821	45732047	-	227	7	7	2	0	0	0	0	3	Yes	0.188428	0.207313	0.0601001	0	0	0	0	0.198327	N/A	Yes	0.151947	0	Yes	2.76989	-4.47566	1.99753	-2.24059	0.0250524	NA	protein_coding	intronic	1	0	0	1	0	0	0	0	0	0	0	0	0	0
wt_saf_neg_peak_41265	chr13	45776879	45776985	-	107	5	6	2	0	0	0	0	2	Yes	0.134592	0.177697	0.0601001	0	0	0	0	0.132218	N/A	Yes	0.12413	0	Yes	2.26112	-4.18188	2.08705	-2.00373	0.0450988	NA	protein_coding	intronic	0	0	0	0	0	0	0	0	0	0	0	0	0	0
wt_saf_neg_peak_41352	chr13	46746198	46746282	-	85	9	3	12	0	0	1	0	2	Yes	0.242265	0.0888484	0.360601	0	0	0.031047	0	0.132218	N/A	Yes	0.230571	0.0155235	Yes	4.50425	-3.645	1.79869	-2.02647	0.0427164	0.224408	other	intronic	0	0	0	0	0	0	0	0	0	0	0	0	0	0
wt_saf_neg_peak_41451	chr13	47026606	47026794	-	189	8	11	1	1	0	0	0	0	Yes	0.215347	0.325777	0.0300501	0.0135716	0	0	0	0	N/A	Yes	0.190391	0	Yes	3.45225	-4.79359	1.95746	-2.44888	0.0143301	0.109582	protein_coding	intronic	0	0	0	0	0	0	0	0	0	0	0	2	0	0
wt_saf_neg_peak_41545	chr13	48852621	48853333	-	713	21	15	21	24	3	6	0	0	Yes	0.565285	0.444242	0.631051	0.325719	0.0910646	0.186282	0	0	N/A	No	0.546859	0.138673	Yes	12.1199	-1.71173	0.803885	-2.12932	0.0332275	0.190558	protein_coding	intronic	0	1	1	1	0	0	0	0	0	0	1	2	0	0
wt_saf_neg_peak_41660	chr13	49437234	49437584	-	351	8	7	6	0	0	0	0	3	Yes	0.215347	0.207313	0.1803	0	0	0	0	0.198327	N/A	Yes	0.200987	0	Yes	3.68471	-4.88428	1.852	-2.6373	0.00835694	0.0764662	other	intronic	0	1	0	0	0	0	0	0	0	0	0	0	0	0
wt_saf_neg_peak_41662	chr13	49445532	49445606	-	75	5	7	1	2	0	0	0	0	Yes	0.134592	0.207313	0.0300501	0.0271433	0	0	0	0	N/A	Yes	0.123985	0	Yes	2.24978	-4.17562	2.12736	-1.96282	0.0496676	NA	other	intronic	0	0	0	0	0	0	0	0	0	0	0	0	0	0
wt_saf_neg_peak_41673	chr13	49463077	49463275	-	199	11	18	9	20	2	2	0	1	Yes	0.296102	0.53309	0.270451	0.271433	0.0607097	0.0620941	0	0.0661091	N/A	No	0.366547	0.0614019	Yes	7.58383	-2.29948	1.08108	-2.12701	0.033419	0.191334	other	intronic	0	0	0	0	0	0	0	0	0	0	0	0	0	0
wt_saf_neg_peak_41712	chr13	49541405	49541493	-	89	21	6	10	4	1	3	0	1	Yes	0.565285	0.177697	0.300501	0.0542865	0.0303548	0.0931411	0	0.0661091	N/A	Yes	0.347828	0.061748	Yes	7.34169	-2.2356	1.12589	-1.98562	0.0470753	0.238424	protein_coding	intronic	0	0	0	0	0	0	0	0	0	0	0	0	0	0
wt_saf_neg_peak_41920	chr13	52889471	52889909	-	439	11	6	15	4	0	1	0	2	Yes	0.296102	0.177697	0.450751	0.0542865	0	0.031047	0	0.132218	N/A	Yes	0.308183	0.0155235	Yes	5.9257	-4.06111	1.70949	-2.37563	0.0175191	0.124856	protein_coding	intronic	0	0	0	0	0	0	0	0	0	0	0	0	0	0
wt_saf_neg_peak_41945	chr13	53102342	53102590	-	249	6	7	2	2	0	0	0	2	Yes	0.16151	0.207313	0.0601001	0.0271433	0	0	0	0.132218	N/A	Yes	0.142974	0	Yes	2.60337	-4.38568	2.02374	-2.16711	0.0302263	NA	other	intronic	0	1	0	0	0	0	0	0	0	0	0	0	0	0
wt_saf_neg_peak_41946	chr13	53103053	53103464	-	412	2	9	12	1	0	0	0	0	Yes	0.0538367	0.266545	0.360601	0.0135716	0	0	0	0	N/A	Yes	0.226994	0	Yes	4.15949	-5.0529	1.8725	-2.69847	0.00696588	0.0673759	other	intronic	0	0	0	0	0	0	0	0	0	0	1	1	0	0
wt_saf_neg_peak_42162	chr13	55180614	55180714	-	101	5	10	1	0	0	0	0	0	Yes	0.134592	0.296161	0.0300501	0	0	0	0	0	N/A	Yes	0.153601	0	Yes	2.77696	-4.47859	2.04482	-2.19022	0.0285086	NA	other	intronic	0	0	0	1	0	0	0	0	0	0	0	0	0	0
wt_saf_neg_peak_42169	chr13	55207476	55207807	-	332	5	12	15	9	0	3	0	4	Yes	0.134592	0.355393	0.450751	0.122145	0	0.0931411	0	0.264436	N/A	Yes	0.313579	0.0465706	Yes	6.44796	-2.47347	1.26117	-1.96126	0.0498491	0.247299	other	intronic	0	0	0	0	0	0	0	0	0	0	0	0	0	0
wt_saf_neg_peak_42196	chr13	55432470	55432971	-	502	12	8	6	7	0	0	0	2	Yes	0.32302	0.236929	0.1803	0.0950014	0	0	0	0.132218	N/A	Yes	0.24675	0	Yes	4.52651	-5.18295	1.79058	-2.89457	0.00379684	0.0439194	other	intronic	0	1	0	0	0	0	0	0	0	0	0	1	0	0
wt_saf_neg_peak_42216	chr13	55495805	55496165	-	361	35	29	21	13	13	5	0	4	Yes	0.942142	0.858867	0.631051	0.176431	0.394613	0.155235	0	0.264436	N/A	Yes	0.810687	0.274924	Yes	18.8695	-1.29572	0.638504	-2.02931	0.0424265	0.223401	other	intronic	1	0	0	0	0	0	0	0	0	0	0	0	0	0
wt_saf_neg_peak_42253	chr13	55699116	55699388	-	273	24	13	9	22	4	2	0	3	Yes	0.64604	0.38501	0.270451	0.298576	0.121419	0.0620941	0	0.198327	N/A	No	0.433833	0.0917567	Yes	9.30826	-1.9795	0.955815	-2.07101	0.0383583	0.209322	other	intronic	0	0	0	0	0	0	0	0	0	0	0	0	0	0
wt_saf_neg_peak_42255	chr13	56067761	56068403	-	643	14	20	11	7	3	0	0	2	Yes	0.376857	0.592322	0.330551	0.0950014	0.0910646	0	0	0.132218	N/A	Yes	0.433243	0.0455323	Yes	8.56116	-2.97291	1.15152	-2.58172	0.00983089	0.0854114	other	intronic	0	1	0	0	0	0	0	0	0	0	0	1	0	0
wt_saf_neg_peak_42289	chr13	56432761	56432970	-	210	7	11	1	5	0	0	0	2	Yes	0.188428	0.325777	0.0300501	0.0678582	0	0	0	0.132218	N/A	Yes	0.181419	0	Yes	3.28573	-4.72193	1.97626	-2.38933	0.016879	0.121848	other	intronic	0	0	0	0	0	0	0	0	0	0	0	0	0	0
wt_saf_neg_peak_42294	chr13	56843694	56844322	-	629	11	14	6	2	0	0	0	0	Yes	0.296102	0.414626	0.1803	0.0271433	0	0	0	0	N/A	Yes	0.297009	0	Yes	5.41437	-5.44063	1.74523	-3.11742	0.00182439	0.0254141	protein_coding	intronic	1	0	0	0	0	0	0	0	0	0	0	0	0	0
wt_saf_neg_peak_42296	chr13	56853684	56853868	-	185	6	8	10	0	0	0	0	1	Yes	0.16151	0.236929	0.300501	0	0	0	0	0.0661091	N/A	Yes	0.23298	0	Yes	4.27569	-5.0953	1.8092	-2.81633	0.00485764	0.0523772	protein_coding	intronic	0	0	0	0	0	0	0	0	0	0	0	0	0	0
wt_saf_neg_peak_42300	chr13	56869896	56869992	-	97	7	6	2	0	0	0	0	0	Yes	0.188428	0.177697	0.0601001	0	0	0	0	0	N/A	Yes	0.142075	0	Yes	2.59416	-4.38135	2.02458	-2.16408	0.0304584	NA	protein_coding	intronic	0	0	0	0	0	0	0	0	0	0	0	0	0	0
wt_saf_neg_peak_42303	chr13	56881377	56881705	-	329	13	4	6	1	0	0	0	0	Yes	0.349938	0.118465	0.1803	0.0135716	0	0	0	0	N/A	Yes	0.216234	0	Yes	3.99012	-5.00157	1.85133	-2.70161	0.00690042	0.0669457	protein_coding	intronic	0	0	0	0	0	0	0	0	0	0	0	0	0	0
wt_saf_neg_peak_42304	chr13	56882085	56882647	-	563	14	10	15	4	0	0	0	1	Yes	0.376857	0.296161	0.450751	0.0542865	0	0	0	0.0661091	N/A	Yes	0.37459	0	Yes	6.89468	-5.78638	1.67948	-3.44534	0.000570336	0.0103535	protein_coding	intronic	0	0	1	0	0	0	0	0	0	0	0	0	0	0
wt_saf_neg_peak_42305	chr13	56887113	56887960	-	848	29	24	9	20	3	1	0	3	Yes	0.780632	0.710787	0.270451	0.271433	0.0910646	0.031047	0	0.198327	N/A	Yes	0.58729	0.0610558	Yes	11.6212	-2.99493	1.00876	-2.96893	0.00298834	0.0369055	protein_coding	exonic	0	0	0	0	0	0	0	0	0	0	0	0	0	0
wt_saf_neg_peak_42469	chr13	59743578	59743906	-	329	9	10	1	6	0	0	0	3	Yes	0.242265	0.296161	0.0300501	0.0814298	0	0	0	0.198327	N/A	Yes	0.189492	0	Yes	3.44304	-4.79028	1.95594	-2.44909	0.0143216	0.109547	protein_coding	exonic	0	0	0	0	0	0	0	0	0	0	0	0	0	0
wt_saf_neg_peak_42505	chr13	60462888	60462964	-	77	24	19	14	15	1	7	0	1	Yes	0.64604	0.562706	0.420701	0.203574	0.0303548	0.217329	0	0.0661091	N/A	Yes	0.543149	0.123842	Yes	11.808	-1.85919	0.859959	-2.16195	0.0306216	0.180624	other	intronic	0	0	0	1	0	0	0	0	0	0	0	0	0	0
wt_saf_neg_peak_42528	chr13	62035403	62035520	-	118	16	25	18	11	3	4	0	2	Yes	0.430693	0.740403	0.540901	0.149288	0.0910646	0.124188	0	0.132218	N/A	Yes	0.570666	0.107626	Yes	12.0164	-2.13019	0.84349	-2.52545	0.0115551	0.0951484	lncRNA	intronic	0	0	0	0	0	0	0	0	0	0	0	0	0	0
wt_saf_neg_peak_42530	chr13	62059176	62059284	-	109	12	25	9	7	0	2	0	2	Yes	0.32302	0.740403	0.270451	0.0950014	0	0.0620941	0	0.132218	N/A	Yes	0.444624	0.031047	Yes	8.54213	-3.56176	1.3035	-2.73246	0.00628642	0.0626673	lncRNA	intronic	0	0	1	0	0	0	0	0	0	0	0	0	0	0
wt_saf_neg_peak_42534	chr13	62136845	62137583	-	739	44	35	22	6	11	11	0	4	Yes	1.18441	1.03656	0.661101	0.0814298	0.333903	0.341517	0	0.264436	N/A	Yes	0.960691	0.33771	Yes	22.5723	-1.23963	0.577024	-2.14831	0.0316892	0.184623	other	intronic	0	0	1	0	0	0	0	0	0	0	0	0	0	0
wt_saf_neg_peak_42653	chr13	62588537	62589153	-	617	20	4	10	4	0	0	0	1	Yes	0.538367	0.118465	0.300501	0.0542865	0	0	0	0.0661091	N/A	Yes	0.319111	0	Yes	5.90405	-5.56634	1.75642	-3.16914	0.00152891	0.0222266	other	intronic	0	0	0	1	0	0	0	0	0	0	0	2	0	0
wt_saf_neg_peak_42743	chr13	63305379	63306068	-	690	36	25	18	10	6	9	0	3	Yes	0.96906	0.740403	0.540901	0.135716	0.182129	0.279423	0	0.198327	N/A	Yes	0.750121	0.230776	Yes	17.1717	-1.43222	0.668867	-2.14126	0.0322528	0.186881	protein_coding	UTR3	0	0	0	0	0	0	0	0	0	0	0	0	0	0
wt_saf_neg_peak_42978	chr13	65200222	65200591	-	370	12	11	12	1	1	1	0	1	Yes	0.32302	0.325777	0.360601	0.0135716	0.0303548	0.031047	0	0.0661091	N/A	Yes	0.336466	0.030701	Yes	6.62881	-3.18564	1.32203	-2.40965	0.0159676	0.117418	protein_coding	intronic	0	2	0	0	0	0	0	0	1	0	0	0	0	0
wt_saf_neg_peak_42983	chr13	65239862	65240070	-	209	3	5	16	0	0	0	0	3	Yes	0.080755	0.148081	0.480801	0	0	0	0	0.198327	N/A	Yes	0.236545	0	Yes	4.37139	-5.12322	1.86424	-2.74815	0.00599321	0.0607149	other	intronic	0	1	0	1	0	0	0	0	0	0	0	0	0	0
wt_saf_neg_peak_43066	chr13	65651204	65651422	-	219	43	50	30	30	13	8	0	0	Yes	1.15749	1.48081	0.901502	0.407149	0.394613	0.248376	0	0	N/A	Yes	1.17993	0.321495	Yes	26.2761	-1.60414	0.553006	-2.90077	0.00372251	0.0433196	other	intronic	0	0	0	1	0	0	0	0	0	0	1	1	0	0
wt_saf_neg_peak_43126	chr13	66223999	66224425	-	427	2	6	7	1	0	0	0	0	Yes	0.0538367	0.177697	0.21035	0.0135716	0	0	0	0	N/A	Yes	0.147295	0	Yes	2.69693	-4.42857	2.01556	-2.19719	0.0280068	NA	other	intronic	0	0	0	1	0	0	0	0	0	0	0	0	0	0
wt_saf_neg_peak_43215	chr13	66497530	66497704	-	175	5	12	6	7	0	1	0	4	Yes	0.134592	0.355393	0.1803	0.0950014	0	0.031047	0	0.264436	N/A	No	0.223429	0.0155235	Yes	4.29729	-3.57532	1.7944	-1.99249	0.0463172	0.235988	other	intronic	0	1	0	0	0	0	0	0	0	0	0	0	0	0
wt_saf_neg_peak_43356	chr13	67081449	67081572	-	124	7	3	5	6	0	0	0	0	Yes	0.188428	0.0888484	0.15025	0.0814298	0	0	0	0	N/A	No	0.142509	0	Yes	2.6282	-4.39704	2.00421	-2.1939	0.0282424	NA	protein_coding	UTR5	0	0	0	0	0	0	0	0	0	0	0	0	0	0
wt_saf_neg_peak_43358	chr13	67083451	67083525	-	75	2	6	5	2	0	0	0	0	Yes	0.0538367	0.177697	0.15025	0.0271433	0	0	0	0	N/A	Yes	0.127261	0	Yes	2.32278	-4.21446	2.0794	-2.02677	0.0426857	NA	protein_coding	intronic	0	0	0	1	0	0	0	0	0	0	0	0	0	0
wt_saf_neg_peak_43447	chr13	67506020	67506264	-	245	5	14	3	0	0	0	0	0	Yes	0.134592	0.414626	0.0901502	0	0	0	0	0	N/A	Yes	0.213122	0	Yes	3.85403	-4.94953	1.88682	-2.62321	0.00871048	0.0786613	other	intronic	0	0	0	0	0	0	0	0	0	0	0	0	0	0
wt_saf_neg_peak_43473	chr13	67644775	67644917	-	143	18	35	9	23	1	8	0	3	Yes	0.48453	1.03656	0.270451	0.312148	0.0303548	0.248376	0	0.198327	N/A	No	0.597182	0.139366	Yes	12.9187	-1.80762	0.885977	-2.04026	0.0413248	0.219443	other	intronic	0	0	0	1	0	0	0	0	0	0	0	0	0	0
wt_saf_neg_peak_43528	chr13	68827372	68828114	-	743	10	12	5	0	0	1	0	0	Yes	0.269183	0.355393	0.15025	0	0	0.031047	0	0	N/A	Yes	0.258276	0.0155235	Yes	4.94282	-3.79196	1.74879	-2.16833	0.0301337	0.178601	protein_coding	intronic	0	0	0	1	0	0	0	0	0	0	1	1	0	0
wt_saf_neg_peak_43539	chr13	68912622	68912866	-	245	10	6	1	0	0	0	0	1	Yes	0.269183	0.177697	0.0300501	0	0	0	0	0.0661091	N/A	Yes	0.158977	0	Yes	2.90665	-4.54745	2.0203	-2.25088	0.0243931	NA	protein_coding	intronic	0	0	0	0	0	0	0	0	0	0	0	0	0	0
wt_saf_neg_peak_43545	chr13	68934465	68934627	-	163	5	3	9	0	0	0	0	0	Yes	0.134592	0.0888484	0.270451	0	0	0	0	0	N/A	Yes	0.16463	0	Yes	3.04345	-4.60374	1.95477	-2.35513	0.0185163	0.128981	protein_coding	intronic	0	0	0	0	0	0	0	0	0	0	0	0	0	0
wt_saf_neg_peak_43550	chr13	68967747	68968030	-	284	15	12	6	0	1	0	0	2	Yes	0.403775	0.355393	0.1803	0	0.0303548	0	0	0.132218	N/A	Yes	0.313156	0.0151774	Yes	5.94815	-4.08505	1.70431	-2.39689	0.0165349	0.120156	protein_coding	intronic	0	1	0	0	0	0	0	0	0	0	0	0	0	0
wt_saf_neg_peak_43576	chr13	69576182	69576570	-	389	11	16	13	12	0	3	0	0	Yes	0.296102	0.473858	0.390651	0.16286	0	0.0931411	0	0	N/A	Yes	0.38687	0.0465706	Yes	7.77584	-2.78002	1.16978	-2.37653	0.0174763	0.124623	protein_coding	intronic	0	0	0	1	0	0	0	0	0	0	0	0	0	0
wt_saf_neg_peak_43608	chr13	70577291	70577780	-	490	24	11	15	11	0	2	0	0	Yes	0.64604	0.325777	0.450751	0.149288	0	0.0620941	0	0	N/A	Yes	0.474189	0.031047	Yes	9.2026	-3.67736	1.2712	-2.89282	0.00381795	0.0441154	other	intronic	0	2	0	0	0	0	0	0	0	0	0	0	0	0
wt_saf_neg_peak_43632	chr13	71959476	71960144	-	669	2	17	21	10	0	3	0	0	Yes	0.0538367	0.503474	0.631051	0.135716	0	0.0931411	0	0	N/A	Yes	0.396121	0.0465706	Yes	7.94949	-2.80699	1.2819	-2.18971	0.028545	0.172392	protein_coding	exonic	0	0	0	0	0	0	0	0	0	0	0	0	0	0
wt_saf_neg_peak_43661	chr13	73840387	73841661	-	1275	62	74	49	17	9	11	0	4	Yes	1.66894	2.19159	1.47245	0.230718	0.273194	0.341517	0	0.264436	N/A	Yes	1.77766	0.307356	Yes	37.0357	-2.25814	0.501909	-4.49911	6.82383e-06	0.00024886	protein_coding	intronic	0	0	0	0	0	0	0	0	0	0	3	3	0	0
wt_saf_neg_peak_43685	chr13	74030315	74030764	-	450	10	17	10	3	0	3	0	1	Yes	0.269183	0.503474	0.300501	0.0407149	0	0.0931411	0	0.0661091	N/A	Yes	0.357719	0.0465706	Yes	7.22383	-2.66264	1.19797	-2.22263	0.0262405	0.162726	other	intronic	0	0	0	0	0	0	0	0	0	0	0	0	0	0
wt_saf_neg_peak_43778	chr13	74477041	74477126	-	86	13	9	3	9	0	1	0	2	Yes	0.349938	0.266545	0.0901502	0.122145	0	0.031047	0	0.132218	N/A	Yes	0.235544	0.0155235	Yes	4.54104	-3.66531	1.79223	-2.04511	0.0408441	0.217806	other	intronic	0	0	0	0	0	0	0	0	0	0	0	0	0	0
wt_saf_neg_peak_43791	chr13	74518707	74518853	-	147	6	6	3	0	0	0	0	0	Yes	0.16151	0.177697	0.0901502	0	0	0	0	0	N/A	Yes	0.143119	0	Yes	2.61472	-4.39098	2.00292	-2.19229	0.0283588	NA	lncRNA	intronic	0	0	0	0	0	0	0	0	0	0	0	0	0	0
wt_saf_neg_peak_43796	chr13	74538407	74538817	-	411	2	17	9	4	1	0	0	1	Yes	0.0538367	0.503474	0.270451	0.0542865	0.0303548	0	0	0.0661091	N/A	Yes	0.27592	0.0151774	Yes	5.22326	-3.8845	1.79642	-2.16235	0.0305912	0.180497	other	intronic	0	0	1	0	0	0	0	0	0	0	2	0	0	0
wt_saf_neg_peak_43798	chr13	74548159	74548233	-	75	14	10	6	0	0	2	0	0	Yes	0.376857	0.296161	0.1803	0	0	0.0620941	0	0	N/A	Yes	0.284439	0.031047	Yes	5.67801	-2.92944	1.39422	-2.10113	0.0356296	0.199564	other	intronic	0	0	0	0	0	0	0	0	0	0	0	0	0	0
wt_saf_neg_peak_43875	chr13	75483270	75483845	-	576	16	22	23	2	0	4	0	4	Yes	0.430693	0.651555	0.691152	0.0271433	0	0.124188	0	0.264436	N/A	Yes	0.591133	0.0620941	Yes	11.7671	-2.97932	0.996933	-2.98849	0.00280362	0.0351229	other	intronic	0	0	0	4	0	0	0	0	0	0	0	0	0	0
wt_saf_neg_peak_43924	chr13	75891684	75892473	-	790	14	15	19	9	2	5	0	4	Yes	0.376857	0.444242	0.570951	0.122145	0.0607097	0.155235	0	0.264436	N/A	Yes	0.464016	0.107972	Yes	10.1274	-1.83133	0.8914	-2.05444	0.0399331	0.214885	protein_coding	intronic	0	0	0	0	0	0	0	0	0	0	0	0	0	0
wt_saf_neg_peak_43952	chr13	75979144	75979637	-	494	17	9	1	0	1	0	0	3	Yes	0.457612	0.266545	0.0300501	0	0.0303548	0	0	0.198327	N/A	Yes	0.251402	0.0151774	Yes	4.81863	-3.77284	1.83782	-2.05289	0.0400834	0.215396	other	intronic	0	1	0	0	0	0	0	0	0	0	0	0	0	0
wt_saf_neg_peak_43981	chr13	77019745	77020388	-	644	5	11	5	0	0	0	0	2	Yes	0.134592	0.325777	0.15025	0	0	0	0	0.132218	N/A	Yes	0.20354	0	Yes	3.70099	-4.88972	1.86923	-2.6159	0.00889921	0.0798055	other	intronic	0	0	0	1	0	0	0	0	0	0	0	1	0	0
wt_saf_neg_peak_44020	chr13	77111646	77111720	-	75	5	5	10	3	0	0	0	0	Yes	0.134592	0.148081	0.300501	0.0407149	0	0	0	0	N/A	Yes	0.194391	0	Yes	3.58199	-4.83869	1.88065	-2.57289	0.0100855	0.0868132	protein_coding	intronic	0	1	0	0	0	0	0	0	0	0	0	0	0	0
wt_saf_neg_peak_44040	chr13	77965531	77965828	-	298	18	42	21	2	6	7	0	1	Yes	0.48453	1.24388	0.631051	0.0271433	0.182129	0.217329	0	0.0661091	N/A	Yes	0.786486	0.199729	Yes	17.256	-1.69478	0.705734	-2.40145	0.0163304	0.119184	other	intronic	0	0	0	0	0	0	0	0	0	0	2	0	0	0
wt_saf_neg_peak_44087	chr13	81424698	81425273	-	576	15	15	8	0	2	0	0	1	Yes	0.403775	0.444242	0.2404	0	0.0607097	0	0	0.0661091	N/A	Yes	0.362806	0.0303548	Yes	7.06865	-3.30364	1.33294	-2.47846	0.013195	0.103663	protein_coding	intronic	0	0	0	0	0	0	0	0	0	0	0	1	0	0
wt_saf_neg_peak_44115	chr13	81491640	81492180	-	541	11	10	6	7	1	0	0	0	Yes	0.296102	0.296161	0.1803	0.0950014	0.0303548	0	0	0	N/A	Yes	0.257521	0.0151774	Yes	4.93061	-3.80219	1.7433	-2.18104	0.0291807	0.174918	protein_coding	intronic	0	0	0	0	0	0	0	0	0	0	1	0	0	0
wt_saf_neg_peak_44123	chr13	81502055	81502470	-	416	8	23	2	21	0	0	0	0	Yes	0.215347	0.681171	0.0601001	0.285004	0	0	0	0	N/A	No	0.318873	0	Yes	5.74807	-5.52711	1.81193	-3.0504	0.00228539	0.0301017	protein_coding	intronic	0	0	0	1	0	0	0	0	0	0	0	0	0	0
wt_saf_neg_peak_44124	chr13	81502865	81503176	-	312	7	8	4	13	0	0	0	1	Yes	0.188428	0.236929	0.1202	0.176431	0	0	0	0.0661091	N/A	No	0.181853	0	Yes	3.31977	-4.73486	1.89922	-2.49306	0.0126649	0.100955	protein_coding	intronic	0	0	0	0	0	0	0	0	0	0	0	0	0	0
wt_saf_neg_peak_44131	chr13	81517936	81518111	-	176	20	22	6	45	1	1	0	1	Yes	0.538367	0.651555	0.1803	0.610724	0.0303548	0.031047	0	0.0661091	N/A	No	0.45674	0.030701	Yes	8.77154	-3.61964	1.29606	-2.7928	0.00522537	0.0551327	protein_coding	exonic	0	0	0	0	0	0	0	0	0	0	0	0	0	0
wt_saf_neg_peak_44140	chr13	81535097	81535573	-	477	19	17	22	23	2	3	0	3	Yes	0.511448	0.503474	0.661101	0.312148	0.0607097	0.0931411	0	0.198327	N/A	No	0.558675	0.0769254	Yes	11.4057	-2.59265	0.918377	-2.82308	0.00475652	0.051605	protein_coding	intronic	0	0	0	0	0	0	0	0	0	0	0	1	0	0
wt_saf_neg_peak_44141	chr13	81537847	81538156	-	310	22	17	6	12	1	1	0	0	Yes	0.592203	0.503474	0.1803	0.16286	0.0303548	0.031047	0	0	N/A	Yes	0.425326	0.030701	Yes	8.22593	-3.52258	1.30562	-2.69802	0.00697543	0.0674359	protein_coding	intronic	0	0	0	0	0	0	0	0	0	0	0	0	0	0
wt_saf_neg_peak_44143	chr13	81540606	81540735	-	130	2	6	7	3	0	0	0	0	Yes	0.0538367	0.177697	0.21035	0.0407149	0	0	0	0	N/A	Yes	0.147295	0	Yes	2.69693	-4.42857	2.01556	-2.19719	0.0280068	NA	protein_coding	intronic	0	1	0	0	0	0	0	0	0	0	0	0	0	0
wt_saf_neg_peak_44178	chr13	81623325	81623473	-	149	6	3	5	0	0	0	0	1	Yes	0.16151	0.0888484	0.15025	0	0	0	0	0.0661091	N/A	Yes	0.133536	0	Yes	2.46168	-4.30178	2.032	-2.11701	0.0342586	NA	protein_coding	intronic	0	1	0	0	0	0	0	0	0	0	0	0	0	0
wt_saf_neg_peak_44213	chr13	81775348	81775475	-	128	4	6	6	0	0	0	0	0	Yes	0.107673	0.177697	0.1803	0	0	0	0	0	N/A	Yes	0.155223	0	Yes	2.8429	-4.50712	1.96171	-2.29755	0.0215875	NA	other	intronic	0	0	0	0	0	0	0	0	0	0	0	0	0	0
wt_saf_neg_peak_44226	chr13	85196692	85196778	-	87	6	1	6	0	0	0	0	0	Yes	0.16151	0.0296161	0.1803	0	0	0	0	0	N/A	Yes	0.123809	0	Yes	2.29729	-4.20088	2.1186	-1.98285	0.0473838	NA	other	intronic	0	0	0	0	0	0	0	0	0	0	0	0	0	0
wt_saf_neg_peak_44275	chr13	86016388	86016871	-	484	17	2	7	3	0	0	0	1	Yes	0.457612	0.0592322	0.21035	0.0407149	0	0	0	0.0661091	N/A	Yes	0.242398	0	Yes	4.49181	-5.17282	1.8593	-2.78214	0.00540025	0.0563997	other	intronic	0	0	0	0	0	0	0	0	0	0	1	0	0	0
wt_saf_neg_peak_44280	chr13	86228147	86228910	-	764	24	7	33	11	2	3	0	3	Yes	0.64604	0.207313	0.991652	0.149288	0.0607097	0.0931411	0	0.198327	N/A	Yes	0.615002	0.0769254	Yes	12.5388	-2.74211	0.969971	-2.827	0.00469868	0.0511629	other	intronic	0	1	0	0	0	0	0	0	0	0	0	0	0	0
wt_saf_neg_peak_44349	chr13	89909762	89910237	-	476	12	29	25	22	5	4	0	0	Yes	0.32302	0.858867	0.751252	0.298576	0.151774	0.124188	0	0	N/A	Yes	0.64438	0.137981	Yes	13.801	-1.94588	0.798513	-2.43688	0.0148148	0.111815	protein_coding	intronic	0	1	0	0	0	0	0	0	0	0	0	0	0	0
wt_saf_neg_peak_44414	chr13	90474131	90474225	-	95	5	2	8	1	0	0	0	1	Yes	0.134592	0.0592322	0.2404	0.0135716	0	0	0	0.0661091	N/A	Yes	0.144741	0	Yes	2.68065	-4.42103	2.02097	-2.18758	0.0287005	NA	other	intronic	0	0	0	0	0	0	0	0	0	0	0	0	0	0
wt_saf_neg_peak_44446	chr13	90587754	90588082	-	329	6	6	20	7	0	1	0	3	Yes	0.16151	0.177697	0.601001	0.0950014	0	0.031047	0	0.198327	N/A	No	0.313403	0.0155235	Yes	6.02847	-4.08287	1.73618	-2.35164	0.018691	0.129725	other	intronic	0	0	0	0	0	0	0	0	0	0	0	1	0	0
wt_saf_neg_peak_44508	chr13	91596746	91597152	-	407	10	7	7	1	0	0	0	3	Yes	0.269183	0.207313	0.21035	0.0135716	0	0	0	0.198327	N/A	Yes	0.228949	0	Yes	4.20482	-5.0751	1.80846	-2.80631	0.00501117	0.0535375	other	intronic	0	1	0	0	0	0	0	0	0	0	0	0	0	0
wt_saf_neg_peak_44631	chr13	93183368	93183623	-	256	16	16	4	42	0	3	0	2	Yes	0.430693	0.473858	0.1202	0.570009	0	0.0931411	0	0.132218	N/A	No	0.341584	0.0465706	Yes	6.92477	-2.59747	1.2489	-2.07981	0.0375426	0.206428	protein_coding	intronic	0	0	0	0	0	0	0	0	0	0	0	0	0	0
wt_saf_neg_peak_44678	chr13	94196150	94196814	-	665	14	20	17	26	5	2	0	1	Yes	0.376857	0.592322	0.510851	0.352863	0.151774	0.0620941	0	0.0661091	N/A	No	0.493343	0.106934	Yes	10.5889	-1.93376	0.878568	-2.20104	0.0277334	0.169101	other	intronic	0	0	0	0	0	0	0	0	0	0	0	1	0	0
wt_saf_neg_peak_44942	chr13	96668486	96668584	-	99	9	22	8	10	2	1	0	2	Yes	0.242265	0.651555	0.2404	0.135716	0.0607097	0.031047	0	0.132218	N/A	No	0.378073	0.0458784	Yes	7.53313	-2.75882	1.18763	-2.32297	0.020181	0.136258	protein_coding	intronic	0	0	0	0	0	0	0	0	0	0	0	0	0	0
wt_saf_neg_peak_44979	chr13	97267429	97267691	-	263	7	8	5	10	0	0	0	3	Yes	0.188428	0.236929	0.15025	0.135716	0	0	0	0.198327	N/A	No	0.191869	0	Yes	3.50684	-4.81311	1.8732	-2.56946	0.0101857	0.0874216	other	intronic	0	0	0	1	0	0	0	0	0	0	0	2	0	0
wt_saf_neg_peak_44986	chr13	97314851	97315106	-	256	6	5	6	0	0	0	0	4	Yes	0.16151	0.148081	0.1803	0	0	0	0	0.264436	N/A	Yes	0.163297	0	Yes	3.00021	-4.58637	1.9332	-2.37243	0.0176716	0.125426	other	intronic	0	0	0	0	0	0	0	0	0	0	0	0	0	0
wt_saf_neg_peak_45045	chr13	97936696	97936863	-	168	4	5	5	15	0	0	0	0	Yes	0.107673	0.148081	0.15025	0.203574	0	0	0	0	N/A	No	0.135335	0	Yes	2.4801	-4.31084	2.02139	-2.13262	0.0329562	NA	protein_coding	intronic	0	0	0	0	0	0	0	0	0	0	0	0	0	0
wt_saf_neg_peak_45053	chr13	97955698	97955914	-	217	7	3	5	4	0	0	0	0	Yes	0.188428	0.0888484	0.15025	0.0542865	0	0	0	0	N/A	Yes	0.142509	0	Yes	2.6282	-4.39704	2.00421	-2.1939	0.0282424	NA	protein_coding	intronic	0	0	0	0	0	0	0	0	0	0	0	0	0	0
wt_saf_neg_peak_45071	chr13	98022162	98022617	-	456	16	9	9	3	1	1	0	0	Yes	0.430693	0.266545	0.270451	0.0407149	0.0303548	0.031047	0	0	N/A	Yes	0.322563	0.030701	Yes	6.38221	-3.12992	1.34009	-2.33561	0.0195116	0.133383	protein_coding	intronic	0	0	0	1	0	0	0	0	0	0	0	0	0	0
wt_saf_neg_peak_45101	chr13	98302005	98302526	-	522	8	6	11	6	0	0	0	2	Yes	0.215347	0.177697	0.330551	0.0814298	0	0	0	0.132218	N/A	Yes	0.241198	0	Yes	4.44435	-5.15157	1.79888	-2.86377	0.00418634	0.0470395	other	intronic	0	0	0	0	0	0	0	0	0	0	0	0	0	0
wt_saf_neg_peak_45259	chr13	99493145	99493239	-	95	15	18	10	8	4	2	0	0	Yes	0.403775	0.53309	0.300501	0.108573	0.121419	0.0620941	0	0	N/A	Yes	0.412455	0.0917567	Yes	8.8753	-1.89591	0.95037	-1.99492	0.0460517	0.23514	protein_coding	intronic	0	0	0	0	0	0	0	0	0	0	0	0	0	0
wt_saf_neg_peak_45382	chr13	100516308	100516544	-	237	9	7	7	6	0	1	0	0	Yes	0.242265	0.207313	0.21035	0.0814298	0	0.031047	0	0	N/A	Yes	0.219976	0.0155235	Yes	4.2718	-3.568	1.77785	-2.00691	0.0447588	0.230943	protein_coding	intronic	0	0	0	0	0	0	0	0	0	0	0	0	0	0
wt_saf_neg_peak_45510	chr13	101720606	101720863	-	258	1	9	5	0	0	0	0	0	Yes	0.0269183	0.266545	0.15025	0	0	0	0	0	N/A	Yes	0.147905	0	Yes	2.68345	-4.42284	2.06067	-2.14631	0.0318483	NA	protein_coding	intronic	0	0	0	0	0	0	0	0	0	0	0	0	0	0
wt_saf_neg_peak_45513	chr13	101723521	101723752	-	232	14	6	4	0	0	0	0	2	Yes	0.376857	0.177697	0.1202	0	0	0	0	0.132218	N/A	Yes	0.224918	0	Yes	4.13395	-5.05428	1.84236	-2.74338	0.00608111	0.0612966	protein_coding	intronic	0	0	0	0	0	0	0	0	0	0	0	0	0	0
wt_saf_neg_peak_45515	chr13	101729968	101730119	-	152	6	6	1	1	0	0	0	0	Yes	0.16151	0.177697	0.0300501	0.0135716	0	0	0	0	N/A	Yes	0.123086	0	Yes	2.24057	-4.17059	2.12625	-1.96148	0.0498234	NA	protein_coding	intronic	0	0	0	0	0	0	0	0	0	0	0	0	0	0
wt_saf_neg_peak_45576	chr13	102824648	102825069	-	422	19	12	19	28	5	3	0	3	Yes	0.511448	0.355393	0.570951	0.380006	0.151774	0.0931411	0	0.198327	N/A	No	0.479264	0.122458	Yes	10.6233	-1.70599	0.853678	-1.99839	0.0456739	0.233888	protein_coding	intronic	0	0	0	0	0	0	0	0	0	0	1	1	0	0
wt_saf_neg_peak_45612	chr13	102918155	102918815	-	661	15	9	23	8	4	2	0	3	Yes	0.403775	0.266545	0.691152	0.108573	0.121419	0.0620941	0	0.198327	N/A	Yes	0.453824	0.0917567	Yes	9.72571	-2.04541	0.951306	-2.15011	0.0315466	0.184083	protein_coding	intronic	1	1	0	0	0	0	0	0	0	0	0	1	0	0
wt_saf_neg_peak_45616	chr13	102930767	102930960	-	194	13	19	11	8	2	0	0	4	Yes	0.349938	0.562706	0.330551	0.108573	0.0607097	0	0	0.264436	N/A	Yes	0.414398	0.0303548	Yes	7.99975	-3.49026	1.30069	-2.68339	0.00728805	0.069541	protein_coding	intronic	0	0	0	0	0	0	0	0	0	0	0	0	0	0
wt_saf_neg_peak_45633	chr13	102969534	102969879	-	346	15	9	10	4	0	0	0	0	Yes	0.403775	0.266545	0.300501	0.0542865	0	0	0	0	N/A	Yes	0.323607	0	Yes	5.9501	-5.57621	1.71314	-3.25495	0.00113411	0.0176872	protein_coding	intronic	0	0	0	0	0	0	0	0	0	0	0	0	0	0
wt_saf_neg_peak_45649	chr13	103000778	103000947	-	170	16	11	13	20	2	3	0	3	Yes	0.430693	0.325777	0.390651	0.271433	0.0607097	0.0931411	0	0.198327	N/A	No	0.382374	0.0769254	Yes	8.16812	-2.0473	0.99944	-2.04845	0.0405164	0.216817	protein_coding	intronic	0	0	0	0	0	0	0	0	0	0	0	0	0	0
wt_saf_neg_peak_45670	chr13	103046549	103046985	-	437	5	10	6	6	0	0	0	0	Yes	0.134592	0.296161	0.1803	0.0814298	0	0	0	0	N/A	Yes	0.203684	0	Yes	3.71233	-4.89339	1.86126	-2.62906	0.00856201	0.0777375	protein_coding	intronic	0	0	0	0	0	0	0	0	0	0	1	3	0	0
wt_saf_neg_peak_45671	chr13	103048778	103049878	-	1101	28	26	23	10	6	2	0	0	Yes	0.753713	0.770019	0.691152	0.135716	0.182129	0.0620941	0	0	N/A	Yes	0.738295	0.122112	Yes	15.3162	-2.32776	0.770067	-3.0228	0.0025045	0.0322541	protein_coding	intronic	0	0	0	0	0	0	0	0	0	0	0	2	0	0
wt_saf_neg_peak_45673	chr13	103052443	103052812	-	370	7	9	3	0	0	0	0	4	Yes	0.188428	0.266545	0.0901502	0	0	0	0	0.264436	N/A	Yes	0.181708	0	Yes	3.30842	-4.73069	1.91364	-2.4721	0.0134323	0.104923	protein_coding	intronic	0	0	0	0	0	0	0	0	0	0	0	0	0	0
wt_saf_neg_peak_45676	chr13	103060424	103060903	-	480	25	13	8	4	5	0	0	0	Yes	0.672958	0.38501	0.2404	0.0542865	0.151774	0	0	0	N/A	Yes	0.432789	0.0758871	Yes	9.03987	-2.25349	1.05654	-2.1329	0.0329329	0.18942	protein_coding	intronic	0	0	0	0	0	0	0	0	0	0	1	0	0	0
wt_saf_neg_peak_45704	chr13	103114438	103115113	-	676	14	24	26	19	6	4	0	0	Yes	0.376857	0.710787	0.781302	0.257861	0.182129	0.124188	0	0	N/A	Yes	0.622982	0.153159	Yes	13.6617	-1.75113	0.772537	-2.26672	0.0234072	0.150641	protein_coding	intronic	0	0	0	1	0	0	0	0	0	0	1	0	0	0
wt_saf_neg_peak_45732	chr13	103176930	103177026	-	97	8	7	3	0	0	0	0	0	Yes	0.215347	0.207313	0.0901502	0	0	0	0	0	N/A	Yes	0.170937	0	Yes	3.12348	-4.64849	1.93221	-2.40579	0.0161375	0.11821	protein_coding	intronic	0	0	0	0	0	0	0	0	0	0	0	0	0	0
wt_saf_neg_peak_45761	chr13	103244583	103244673	-	91	6	13	7	11	0	0	0	0	Yes	0.16151	0.38501	0.21035	0.149288	0	0	0	0	N/A	No	0.25229	0	Yes	4.59312	-5.20072	1.79479	-2.89767	0.00375941	0.0436176	protein_coding	intronic	0	0	0	0	0	0	0	0	0	0	0	0	0	0
wt_saf_neg_peak_45766	chr13	103251232	103251969	-	738	44	47	28	27	7	15	0	0	Yes	1.18441	1.39196	0.841402	0.366434	0.212484	0.465706	0	0	N/A	Yes	1.13925	0.339095	Yes	25.8608	-1.47205	0.564539	-2.60753	0.00911992	0.0811127	protein_coding	intronic	0	2	0	0	0	0	0	0	0	0	0	1	0	0
wt_saf_neg_peak_45792	chr13	103318756	103318832	-	77	6	21	7	10	1	0	0	0	Yes	0.16151	0.621938	0.21035	0.135716	0.0303548	0	0	0	N/A	No	0.331266	0.0151774	Yes	6.21811	-4.14795	1.72304	-2.40734	0.0160691	0.117877	protein_coding	intronic	0	0	0	0	0	0	0	0	0	0	0	1	0	0
wt_saf_neg_peak_45795	chr13	103325143	103325217	-	75	9	17	9	9	0	1	0	0	Yes	0.242265	0.503474	0.270451	0.122145	0	0.031047	0	0	N/A	Yes	0.33873	0.0155235	Yes	6.40324	-4.18011	1.68548	-2.48007	0.0131357	0.103361	protein_coding	intronic	0	1	0	0	0	0	0	0	0	0	0	0	0	0
wt_saf_neg_peak_45822	chr13	103811238	103811394	-	157	10	4	9	7	0	0	0	2	Yes	0.269183	0.118465	0.270451	0.0950014	0	0	0	0.132218	N/A	Yes	0.219366	0	Yes	4.05178	-5.02023	1.83723	-2.7325	0.00628549	0.0626603	other	intronic	0	0	0	0	0	0	0	0	0	0	0	1	0	0
wt_saf_neg_peak_45930	chr13	104154827	104155022	-	196	14	19	21	30	1	5	0	3	Yes	0.376857	0.562706	0.631051	0.407149	0.0303548	0.155235	0	0.198327	N/A	No	0.523538	0.092795	Yes	10.9853	-2.22141	0.913672	-2.43129	0.015045	0.112996	protein_coding	intronic	0	0	0	0	0	0	0	0	0	0	0	0	0	0
wt_saf_neg_peak_45936	chr13	104165063	104165392	-	330	33	18	7	5	6	3	0	0	Yes	0.888305	0.53309	0.21035	0.0678582	0.182129	0.0931411	0	0	N/A	Yes	0.543915	0.137635	Yes	11.9833	-1.7206	0.867499	-1.98341	0.0473218	0.239285	protein_coding	intronic	0	0	0	0	0	0	0	0	0	0	0	0	0	0
wt_saf_neg_peak_45968	chr13	104606329	104606598	-	270	7	6	1	1	0	0	0	0	Yes	0.188428	0.177697	0.0300501	0.0135716	0	0	0	0	N/A	Yes	0.132058	0	Yes	2.40709	-4.27447	2.09359	-2.04169	0.0411823	NA	other	intronic	0	0	1	0	0	0	0	0	0	0	0	0	0	0
wt_saf_neg_peak_46074	chr13	105214932	105215168	-	237	25	8	2	3	0	0	0	1	Yes	0.672958	0.236929	0.0601001	0.0407149	0	0	0	0.0661091	N/A	Yes	0.323329	0	Yes	5.94298	-5.57951	1.80478	-3.09152	0.00199132	0.0271828	protein_coding	intronic	0	0	0	0	0	0	0	0	0	0	0	0	0	0
wt_saf_neg_peak_46116	chr13	106825685	106825759	-	75	5	10	7	18	0	0	0	0	Yes	0.134592	0.296161	0.21035	0.244289	0	0	0	0	N/A	No	0.213701	0	Yes	3.89941	-4.96368	1.84329	-2.69285	0.0070845	0.0681762	protein_coding	intronic	0	0	0	0	0	0	0	0	0	0	0	0	0	0
wt_saf_neg_peak_46188	chr13	106945016	106945158	-	143	5	7	2	0	0	0	0	1	Yes	0.134592	0.207313	0.0601001	0	0	0	0	0.0661091	N/A	Yes	0.134001	0	Yes	2.43685	-4.28968	2.05465	-2.08779	0.0368168	NA	other	intronic	0	0	0	1	0	0	0	0	0	0	0	0	0	0
wt_saf_neg_peak_46304	chr13	107857942	107858296	-	355	19	25	23	19	8	5	0	3	Yes	0.511448	0.740403	0.691152	0.257861	0.242839	0.155235	0	0.198327	N/A	Yes	0.647668	0.199037	Yes	14.7806	-1.43085	0.705797	-2.02728	0.0426335	0.224128	protein_coding	intronic	0	0	0	0	0	0	0	0	0	0	1	1	0	0
wt_saf_neg_peak_46361	chr13	108120550	108120759	-	210	13	18	15	9	2	2	0	0	Yes	0.349938	0.53309	0.450751	0.122145	0.0607097	0.0620941	0	0	N/A	Yes	0.444593	0.0614019	Yes	9.03931	-2.58226	1.0253	-2.51853	0.0117847	0.0964213	protein_coding	intronic	0	2	0	0	0	0	0	0	0	0	0	0	0	0
wt_saf_neg_peak_46380	chr13	108152310	108152651	-	342	12	27	8	38	4	2	0	0	Yes	0.32302	0.799635	0.2404	0.515722	0.121419	0.0620941	0	0	N/A	No	0.454352	0.0917567	Yes	9.58316	-2.0255	0.972504	-2.08277	0.0372726	0.205481	protein_coding	intronic	0	0	0	0	0	0	0	0	0	0	0	0	0	0
wt_saf_neg_peak_46410	chr13	109378295	109378485	-	191	14	21	1	14	2	0	0	4	Yes	0.376857	0.621938	0.0300501	0.190003	0.0607097	0	0	0.264436	N/A	No	0.342948	0.0303548	Yes	6.64698	-3.21475	1.4703	-2.18645	0.0287823	0.173317	other	intronic	0	1	0	0	0	0	0	0	0	0	0	0	0	0
wt_saf_neg_peak_46411	chr13	109383646	109383785	-	140	10	4	5	0	0	0	0	0	Yes	0.269183	0.118465	0.15025	0	0	0	0	0	N/A	Yes	0.179299	0	Yes	3.30348	-4.72874	1.90997	-2.47581	0.0132933	0.104174	other	intronic	0	0	0	0	0	0	0	0	0	0	0	0	0	0
wt_saf_neg_peak_46419	chr13	109462849	109462943	-	95	8	7	2	1	0	0	0	0	Yes	0.215347	0.207313	0.0601001	0.0135716	0	0	0	0	N/A	Yes	0.16092	0	Yes	2.93641	-4.56035	1.97501	-2.30902	0.0209424	0.139684	other	intronic	0	1	0	0	0	0	0	0	0	0	0	0	0	0
wt_saf_neg_peak_46422	chr13	109560192	109560294	-	103	9	6	3	5	0	0	0	2	Yes	0.242265	0.177697	0.0901502	0.0678582	0	0	0	0.132218	N/A	Yes	0.170037	0	Yes	3.11427	-4.64487	1.93595	-2.39927	0.0164277	0.119664	other	intronic	0	0	0	0	0	0	0	0	0	0	0	0	0	0
wt_saf_neg_peak_46423	chr13	109560946	109561093	-	148	9	9	8	8	1	0	0	4	Yes	0.242265	0.266545	0.2404	0.108573	0.0303548	0	0	0.264436	N/A	Yes	0.249737	0.0151774	Yes	4.79599	-3.75813	1.7451	-2.15353	0.031277	0.183098	other	intronic	0	0	1	0	0	0	0	0	0	0	0	0	0	0
wt_saf_neg_peak_46438	chr13	109791712	109791974	-	263	7	6	6	0	0	0	0	0	Yes	0.188428	0.177697	0.1803	0	0	0	0	0	N/A	Yes	0.182142	0	Yes	3.34246	-4.74301	1.88818	-2.51194	0.012007	0.0976167	other	intronic	0	0	0	0	0	0	0	0	0	0	0	0	0	0
wt_saf_neg_peak_46440	chr13	109800326	109800692	-	367	10	6	2	0	0	0	0	0	Yes	0.269183	0.177697	0.0601001	0	0	0	0	0	N/A	Yes	0.168993	0	Yes	3.09372	-4.63663	1.96017	-2.36543	0.0180093	0.126852	other	intronic	0	0	0	0	0	0	0	0	0	0	0	0	0	0
wt_saf_neg_peak_46445	chr13	109861610	109862063	-	454	36	21	23	4	3	3	0	3	Yes	0.96906	0.621938	0.691152	0.0542865	0.0910646	0.0931411	0	0.198327	N/A	Yes	0.760717	0.0921028	Yes	15.3457	-2.7823	0.824062	-3.37633	0.000734602	0.0126581	other	intronic	0	1	0	0	0	0	0	0	0	0	2	0	0	0
wt_saf_neg_peak_46523	chr13	111780352	111780570	-	219	15	18	5	6	0	3	0	0	Yes	0.403775	0.53309	0.15025	0.0814298	0	0.0931411	0	0	N/A	Yes	0.362372	0.0465706	Yes	7.29679	-2.68125	1.22387	-2.1908	0.0284665	0.172078	protein_coding	intronic	0	0	0	0	0	0	0	0	0	0	1	2	0	0
wt_saf_neg_peak_46545	chr13	112354519	112354906	-	388	4	5	6	0	0	0	0	3	Yes	0.107673	0.148081	0.1803	0	0	0	0	0.198327	N/A	Yes	0.145351	0	Yes	2.66717	-4.41486	1.9898	-2.21874	0.0265041	NA	other	intronic	0	0	0	0	0	0	0	0	0	0	0	0	0	0
wt_saf_neg_peak_46548	chr13	112461846	112462009	-	164	4	6	6	0	0	0	0	2	Yes	0.107673	0.177697	0.1803	0	0	0	0	0.132218	N/A	Yes	0.155223	0	Yes	2.8429	-4.50712	1.96171	-2.29755	0.0215875	NA	other	intronic	0	0	0	0	0	0	0	0	0	0	0	1	0	0
wt_saf_neg_peak_46583	chr13	112691795	112691966	-	172	5	11	9	2	0	0	0	4	Yes	0.134592	0.325777	0.270451	0.0271433	0	0	0	0.264436	N/A	Yes	0.243607	0	Yes	4.44929	-5.15308	1.80423	-2.85611	0.00428867	0.047909	other	intronic	0	0	0	0	0	0	0	0	0	0	0	0	0	0
wt_saf_neg_peak_46649	chr13	113653138	113653793	-	656	23	14	8	17	0	0	0	3	Yes	0.619122	0.414626	0.2404	0.230718	0	0	0	0.198327	N/A	No	0.424716	0	Yes	7.78675	-5.96675	1.66931	-3.57439	0.000351047	0.00701305	other	intronic	0	0	0	1	0	0	0	0	0	0	0	0	0	0
wt_saf_neg_peak_46650	chr13	113657723	113658092	-	370	3	5	10	0	0	0	0	0	Yes	0.080755	0.148081	0.300501	0	0	0	0	0	N/A	Yes	0.176445	0	Yes	3.24895	-4.69634	1.93559	-2.42632	0.0152529	0.113984	other	intronic	0	0	0	1	0	0	0	0	0	0	0	0	0	0
wt_saf_neg_peak_46655	chr13	113680437	113681249	-	813	28	28	23	38	11	2	0	4	Yes	0.753713	0.829251	0.691152	0.515722	0.333903	0.0620941	0	0.264436	N/A	No	0.758039	0.197999	Yes	16.7634	-1.67191	0.71177	-2.34894	0.0188267	0.1304	other	intronic	0	0	0	2	0	0	0	0	0	0	0	0	0	0
wt_saf_neg_peak_46668	chr13	113718082	113718466	-	385	9	9	4	10	0	0	0	0	Yes	0.242265	0.266545	0.1202	0.135716	0	0	0	0	N/A	No	0.20967	0	Yes	3.82854	-4.94148	1.85123	-2.66929	0.00760114	0.0716365	other	intronic	0	0	0	1	0	0	0	0	0	0	1	1	0	0
wt_saf_neg_peak_46683	chr13	113975757	113976022	-	266	11	6	8	2	0	1	0	2	Yes	0.296102	0.177697	0.2404	0.0271433	0	0.031047	0	0.132218	N/A	Yes	0.238066	0.0155235	Yes	4.61618	-3.68668	1.76068	-2.0939	0.0362693	0.201891	other	intronic	0	0	0	0	0	0	0	0	0	0	0	0	0	0
wt_saf_neg_peak_46743	chr13	114454212	114454419	-	208	7	7	13	6	0	0	0	2	Yes	0.188428	0.207313	0.390651	0.0814298	0	0	0	0.132218	N/A	Yes	0.262131	0	Yes	4.82771	-5.26967	1.77954	-2.96126	0.00306382	0.0375986	protein_coding	UTR3	0	0	0	0	0	0	0	0	0	0	0	0	0	0
wt_saf_neg_peak_46768	chr13	115043732	115044167	-	436	8	5	2	15	0	0	0	0	Yes	0.215347	0.148081	0.0601001	0.203574	0	0	0	0	N/A	No	0.141176	0	Yes	2.58495	-4.37697	2.02967	-2.15649	0.0310452	NA	protein_coding	intronic	0	0	0	0	0	0	0	0	0	0	0	1	0	0
wt_saf_neg_peak_46967	chr14	6270367	6270724	-	358	10	11	7	0	0	2	0	1	Yes	0.269183	0.325777	0.21035	0	0	0.0620941	0	0.0661091	N/A	Yes	0.268437	0.031047	Yes	5.37473	-2.84054	1.4018	-2.02636	0.0427281	0.22445	protein_coding	intronic	0	1	0	1	0	0	0	0	0	0	0	0	0	0
wt_saf_neg_peak_46973	chr14	6731401	6731774	-	374	8	6	4	0	0	0	0	0	Yes	0.215347	0.177697	0.1202	0	0	0	0	0	N/A	Yes	0.171081	0	Yes	3.13483	-4.65289	1.92078	-2.42239	0.0154186	0.114712	other	intronic	0	1	0	0	0	0	0	0	0	0	0	0	0	0
wt_saf_neg_peak_47061	chr14	8021307	8021409	-	103	20	7	12	0	0	1	0	0	Yes	0.538367	0.207313	0.360601	0	0	0.031047	0	0	N/A	Yes	0.36876	0.0155235	Yes	7.03889	-4.32395	1.67353	-2.58373	0.00977379	0.0850806	other	intronic	0	1	0	0	0	0	0	0	0	0	0	0	0	0
wt_saf_neg_peak_47062	chr14	8040084	8040291	-	208	8	6	1	0	0	0	0	3	Yes	0.215347	0.177697	0.0300501	0	0	0	0	0.198327	N/A	Yes	0.141031	0	Yes	2.57361	-4.37134	2.06559	-2.11626	0.0343224	NA	other	intronic	0	0	0	0	0	0	0	0	0	0	0	0	0	0
wt_saf_neg_peak_47065	chr14	8094741	8094817	-	77	3	8	8	2	0	0	0	4	Yes	0.080755	0.236929	0.2404	0.0271433	0	0	0	0.264436	N/A	Yes	0.186028	0	Yes	3.40198	-4.76454	1.90818	-2.4969	0.0125283	0.100236	other	intronic	0	0	0	0	0	0	0	0	0	0	0	1	0	0
wt_saf_neg_peak_47143	chr14	8590526	8590755	-	230	14	13	7	1	3	0	0	2	Yes	0.376857	0.38501	0.21035	0.0135716	0.0910646	0	0	0.132218	N/A	Yes	0.324072	0.0455323	Yes	6.58276	-2.5618	1.22907	-2.08434	0.0371292	0.205006	protein_coding	intronic	0	0	0	0	0	0	0	0	0	0	0	0	0	0
wt_saf_neg_peak_47264	chr14	10259066	10259322	-	257	6	5	5	10	0	0	0	0	Yes	0.16151	0.148081	0.15025	0.135716	0	0	0	0	N/A	No	0.15328	0	Yes	2.81313	-4.49441	1.96029	-2.29272	0.0218639	NA	protein_coding	intronic	0	0	0	1	0	0	0	0	0	0	0	0	0	0
wt_saf_neg_peak_47281	chr14	10291254	10291483	-	230	3	8	11	0	0	0	0	0	Yes	0.080755	0.236929	0.330551	0	0	0	0	0	N/A	Yes	0.216078	0	Yes	3.96321	-4.98362	1.86414	-2.67341	0.0075084	0.0710054	protein_coding	intronic	0	0	0	0	0	0	0	0	0	0	0	0	0	0
wt_saf_neg_peak_47332	chr14	10416995	10417215	-	221	6	8	8	6	1	0	0	2	Yes	0.16151	0.236929	0.2404	0.0814298	0.0303548	0	0	0.132218	N/A	Yes	0.212947	0.0151774	Yes	4.12071	-3.52638	1.7931	-1.96664	0.0492248	0.245474	protein_coding	intronic	0	0	0	0	0	0	0	0	0	0	0	0	0	0
wt_saf_neg_peak_47336	chr14	10426656	10426915	-	260	9	2	6	0	0	0	0	3	Yes	0.242265	0.0592322	0.1803	0	0	0	0	0.198327	N/A	Yes	0.160599	0	Yes	2.97258	-4.57502	1.97567	-2.31568	0.0205757	0.13804	protein_coding	intronic	0	0	0	0	0	0	0	0	0	0	0	0	0	0
wt_saf_neg_peak_47392	chr14	11801682	11801815	-	134	8	8	2	0	0	0	0	0	Yes	0.215347	0.236929	0.0601001	0	0	0	0	0	N/A	Yes	0.170792	0	Yes	3.11214	-4.64396	1.95344	-2.37733	0.0174387	0.124455	other	intronic	0	0	0	0	0	0	0	0	0	0	0	0	0	0
wt_saf_neg_peak_47411	chr14	12453034	12453315	-	282	3	5	5	0	0	0	0	4	Yes	0.080755	0.148081	0.15025	0	0	0	0	0.264436	N/A	Yes	0.126362	0	Yes	2.31358	-4.20951	2.06276	-2.04072	0.0412791	NA	protein_coding	intronic	0	1	0	0	0	0	0	0	0	0	0	0	0	0
wt_saf_neg_peak_47412	chr14	12471526	12471760	-	235	10	8	1	0	0	0	0	2	Yes	0.269183	0.236929	0.0300501	0	0	0	0	0.132218	N/A	Yes	0.178721	0	Yes	3.2581	-4.71145	1.97485	-2.38573	0.0170453	0.122604	protein_coding	intronic	0	0	0	0	0	0	0	0	0	0	0	0	0	0
wt_saf_neg_peak_47418	chr14	12651724	12651980	-	257	9	12	3	2	0	0	0	3	Yes	0.242265	0.355393	0.0901502	0.0271433	0	0	0	0.198327	N/A	Yes	0.229269	0	Yes	4.16865	-5.06459	1.8428	-2.74831	0.0059903	0.0607004	protein_coding	intronic	0	0	0	0	0	0	0	0	0	0	0	1	0	0
wt_saf_neg_peak_47496	chr14	14695803	14696140	-	338	9	3	5	0	0	0	0	4	Yes	0.242265	0.0888484	0.15025	0	0	0	0	0.264436	N/A	Yes	0.160455	0	Yes	2.96124	-4.57048	1.95988	-2.33202	0.0196998	0.134175	other	intronic	0	0	0	0	0	0	0	0	0	0	0	0	0	0
wt_saf_neg_peak_47570	chr14	18292769	18292880	-	112	8	5	2	0	0	0	0	0	Yes	0.215347	0.148081	0.0601001	0	0	0	0	0	N/A	Yes	0.141176	0	Yes	2.58495	-4.37697	2.02967	-2.15649	0.0310452	NA	protein_coding	intronic	0	0	0	1	0	0	0	0	0	0	0	0	0	0
wt_saf_neg_peak_47606	chr14	18583993	18584120	-	128	8	3	5	7	0	0	0	0	Yes	0.215347	0.0888484	0.15025	0.0950014	0	0	0	0	N/A	No	0.151482	0	Yes	2.79472	-4.48637	1.98044	-2.26535	0.0234914	NA	protein_coding	intronic	0	0	0	0	0	0	0	0	0	0	0	1	0	0
wt_saf_neg_peak_47646	chr14	18707265	18707666	-	402	21	4	16	14	3	0	0	0	Yes	0.565285	0.118465	0.480801	0.190003	0.0910646	0	0	0	N/A	Yes	0.388184	0.0455323	Yes	7.8505	-2.83983	1.23362	-2.30204	0.021333	0.141404	protein_coding	intronic	0	0	0	0	0	0	0	0	0	0	0	0	0	0
wt_saf_neg_peak_47755	chr14	19803584	19803958	-	375	9	14	3	9	0	0	0	4	Yes	0.242265	0.414626	0.0901502	0.122145	0	0	0	0.264436	N/A	No	0.249014	0	Yes	4.52011	-5.18112	1.82439	-2.83992	0.00451242	0.0496742	other	intronic	0	0	0	0	0	0	0	0	0	0	0	0	0	0
wt_saf_neg_peak_47815	chr14	19976533	19976686	-	154	7	17	4	9	1	1	0	1	Yes	0.188428	0.503474	0.1202	0.122145	0.0303548	0.031047	0	0.0661091	N/A	No	0.270701	0.030701	Yes	5.35399	-2.85422	1.42838	-1.99821	0.0456934	0.233946	protein_coding	UTR5	0	0	0	0	0	0	0	0	0	0	0	0	0	0
wt_saf_neg_peak_47817	chr14	20061488	20061913	-	426	11	10	9	0	0	1	0	1	Yes	0.296102	0.296161	0.270451	0	0	0.031047	0	0.0661091	N/A	Yes	0.287571	0.0155235	Yes	5.50617	-3.95371	1.70792	-2.31493	0.0206168	0.138232	other	intronic	0	0	0	2	0	0	0	0	0	0	1	0	0	0
wt_saf_neg_peak_47842	chr14	20214081	20214416	-	336	8	12	7	2	0	2	0	0	Yes	0.215347	0.355393	0.21035	0.0271433	0	0.0620941	0	0	N/A	Yes	0.260364	0.031047	Yes	5.21742	-2.79215	1.41564	-1.97237	0.0485679	0.243355	other	intronic	0	2	0	0	0	0	0	0	0	0	0	0	0	0
wt_saf_neg_peak_47859	chr14	20378208	20378351	-	144	9	6	1	0	0	0	0	3	Yes	0.242265	0.177697	0.0300501	0	0	0	0	0.198327	N/A	Yes	0.150004	0	Yes	2.74013	-4.4621	2.04133	-2.18588	0.0288244	NA	lncRNA	exonic	0	0	0	0	0	0	0	0	0	0	0	0	0	0
wt_saf_neg_peak_47914	chr14	20550900	20551137	-	238	41	21	26	28	8	8	0	4	Yes	1.10365	0.621938	0.781302	0.380006	0.242839	0.248376	0	0.264436	N/A	Yes	0.835631	0.245608	Yes	19.0028	-1.50421	0.64058	-2.3482	0.0188643	0.130555	protein_coding	intronic	0	0	1	0	0	0	0	0	0	0	0	2	0	0
wt_saf_neg_peak_48071	chr14	21614194	21614378	-	185	26	20	8	5	1	1	0	1	Yes	0.699877	0.592322	0.2404	0.0678582	0.0303548	0.031047	0	0.0661091	N/A	Yes	0.510867	0.030701	Yes	9.79335	-3.78725	1.26557	-2.99251	0.00276689	0.0347819	other	intronic	0	0	0	0	0	0	0	0	0	0	0	0	0	0
wt_saf_neg_peak_48105	chr14	23764614	23765518	-	905	21	7	6	8	1	1	0	2	Yes	0.565285	0.207313	0.1803	0.108573	0.0303548	0.031047	0	0.132218	N/A	No	0.317633	0.030701	Yes	6.30212	-3.11326	1.37762	-2.25988	0.0238284	0.152497	protein_coding	intronic	0	0	0	1	0	0	0	0	0	0	3	1	0	0
wt_saf_neg_peak_48110	chr14	23887686	23887853	-	168	10	11	3	3	1	0	0	3	Yes	0.269183	0.325777	0.0901502	0.0407149	0.0303548	0	0	0.198327	N/A	Yes	0.22837	0.0151774	Yes	4.3786	-3.6246	1.80082	-2.01275	0.0441405	0.22899	protein_coding	intronic	0	0	0	0	0	0	0	0	0	0	1	0	0	0
wt_saf_neg_peak_48116	chr14	23914863	23915209	-	347	1	9	7	7	0	0	0	0	Yes	0.0269183	0.266545	0.21035	0.0950014	0	0	0	0	N/A	Yes	0.167938	0	Yes	3.0576	-4.61008	2.00539	-2.29885	0.0215134	0.142182	protein_coding	intronic	0	0	0	0	0	0	0	0	0	0	0	0	0	0
wt_saf_neg_peak_48147	chr14	24126314	24126834	-	521	16	6	16	0	0	0	0	2	Yes	0.430693	0.177697	0.480801	0	0	0	0	0.132218	N/A	Yes	0.363064	0	Yes	6.71188	-5.74782	1.70497	-3.37122	0.000748371	0.0128313	other	intronic	0	1	0	0	0	0	0	0	0	0	0	0	0	0
wt_saf_neg_peak_48285	chr14	26401009	26401083	-	75	1	10	5	0	0	0	0	3	Yes	0.0269183	0.296161	0.15025	0	0	0	0	0.198327	N/A	Yes	0.157777	0	Yes	2.85918	-4.51465	2.03801	-2.21522	0.0267446	NA	other	intronic	0	0	0	0	0	0	0	0	0	0	0	0	0	0
wt_saf_neg_peak_48356	chr14	26637691	26637936	-	246	8	10	7	15	0	1	0	2	Yes	0.215347	0.296161	0.21035	0.203574	0	0.031047	0	0.132218	N/A	No	0.240619	0.0155235	Yes	4.63247	-3.69128	1.75571	-2.10245	0.035514	0.199116	lncRNA	intronic	0	0	0	0	0	0	0	0	0	0	0	0	0	0
wt_saf_neg_peak_48406	chr14	27046815	27046973	-	159	5	5	3	11	0	0	0	0	Yes	0.134592	0.148081	0.0901502	0.149288	0	0	0	0	N/A	No	0.124274	0	Yes	2.27247	-4.18793	2.06773	-2.02537	0.0428294	NA	other	intronic	0	0	0	0	0	0	0	0	0	0	0	0	0	0
wt_saf_neg_peak_48458	chr14	27643995	27644277	-	283	36	52	53	3	8	13	0	4	Yes	0.96906	1.54004	1.59265	0.0407149	0.242839	0.403612	0	0.264436	N/A	Yes	1.36725	0.323225	Yes	29.8363	-1.80566	0.540393	-3.34138	0.000833624	0.0139501	other	intronic	0	0	1	0	0	0	0	0	0	0	0	2	0	0
wt_saf_neg_peak_48489	chr14	29939340	29939433	-	94	7	5	4	8	0	0	0	0	Yes	0.188428	0.148081	0.1202	0.108573	0	0	0	0	N/A	No	0.152236	0	Yes	2.79258	-4.48558	1.9677	-2.2796	0.0226311	NA	other	intronic	0	0	0	0	0	0	0	0	0	0	1	0	0	0
wt_saf_neg_peak_48536	chr14	30728676	30729048	-	373	14	6	4	0	0	1	0	4	Yes	0.376857	0.177697	0.1202	0	0	0.031047	0	0.264436	N/A	Yes	0.224918	0.0155235	Yes	4.36745	-3.60594	1.79939	-2.00398	0.0450725	0.232004	other	intronic	0	1	0	0	0	0	0	0	0	0	0	0	0	0
wt_saf_neg_peak_48539	chr14	30995276	30995497	-	222	8	5	1	0	0	0	0	2	Yes	0.215347	0.148081	0.0300501	0	0	0	0	0.132218	N/A	Yes	0.131159	0	Yes	2.39788	-4.26971	2.0988	-2.03436	0.0419155	NA	other	intronic	0	1	0	0	0	0	0	0	0	0	0	0	0	0
wt_saf_neg_peak_48601	chr14	31458544	31458843	-	300	5	8	1	0	0	0	0	3	Yes	0.134592	0.236929	0.0300501	0	0	0	0	0.198327	N/A	Yes	0.133857	0	Yes	2.42551	-4.28384	2.09557	-2.04423	0.0409305	NA	other	intronic	0	0	0	0	0	0	0	0	0	0	1	0	0	0
wt_saf_neg_peak_48603	chr14	31472742	31472862	-	121	11	6	6	5	0	0	0	2	Yes	0.296102	0.177697	0.1803	0.0678582	0	0	0	0.132218	N/A	Yes	0.218033	0	Yes	4.00854	-5.00734	1.83059	-2.73537	0.006231	0.062297	other	intronic	0	0	0	0	0	0	0	0	0	0	0	0	0	0
wt_saf_neg_peak_48787	chr14	33403670	33403803	-	134	8	11	5	0	0	1	0	1	Yes	0.215347	0.325777	0.15025	0	0	0.031047	0	0.0661091	N/A	Yes	0.230458	0.0155235	Yes	4.43405	-3.62573	1.77667	-2.04075	0.0412761	0.219278	protein_coding	intronic	0	0	0	0	0	0	0	0	0	0	0	1	0	0
wt_saf_neg_peak_48845	chr14	34288772	34288846	-	75	5	8	9	6	0	0	0	0	Yes	0.134592	0.236929	0.270451	0.0814298	0	0	0	0	N/A	Yes	0.21399	0	Yes	3.9221	-4.97064	1.84021	-2.70113	0.00691048	0.0669861	protein_coding	intronic	0	0	0	0	0	0	0	0	0	0	0	1	0	0
wt_saf_neg_peak_48865	chr14	34352586	34352713	-	128	7	5	11	10	0	1	0	0	Yes	0.188428	0.148081	0.330551	0.135716	0	0.031047	0	0	N/A	No	0.222353	0.0155235	Yes	4.3356	-3.5864	1.78835	-2.00543	0.0449176	0.231469	protein_coding	intronic	0	0	0	1	0	0	0	0	0	0	0	0	0	0
wt_saf_neg_peak_49022	chr14	40345731	40345857	-	127	20	14	26	16	5	3	0	2	Yes	0.538367	0.414626	0.781302	0.217146	0.151774	0.0931411	0	0.132218	N/A	Yes	0.578098	0.122458	Yes	12.4508	-1.97568	0.823335	-2.39961	0.0164127	0.1196	other	intronic	0	1	0	0	0	0	0	0	0	0	0	0	0	0
wt_saf_neg_peak_49025	chr14	40812688	40813104	-	417	5	2	8	12	0	0	0	0	Yes	0.134592	0.0592322	0.2404	0.16286	0	0	0	0	N/A	No	0.144741	0	Yes	2.68065	-4.42103	2.02097	-2.18758	0.0287005	NA	other	intronic	0	0	0	1	0	0	0	0	0	0	0	1	0	0
wt_saf_neg_peak_49089	chr14	42534404	42534900	-	497	11	8	12	1	0	1	0	4	Yes	0.296102	0.236929	0.360601	0.0135716	0	0.031047	0	0.264436	N/A	Yes	0.297877	0.0155235	Yes	5.71594	-4.00843	1.70333	-2.35328	0.0186084	0.129401	other	intronic	0	2	0	0	0	0	0	0	0	0	0	0	0	0
wt_saf_neg_peak_49233	chr14	46761104	46761813	-	710	4	13	17	7	0	2	0	2	Yes	0.107673	0.38501	0.510851	0.0950014	0	0.0620941	0	0.132218	N/A	Yes	0.334511	0.031047	Yes	6.59781	-3.1554	1.3921	-2.26665	0.0234114	0.150647	other	intronic	0	0	0	1	0	0	0	0	0	0	1	1	0	0
wt_saf_neg_peak_49257	chr14	46931477	46931689	-	213	12	11	10	5	0	0	0	3	Yes	0.32302	0.325777	0.300501	0.0678582	0	0	0	0.198327	N/A	Yes	0.316433	0	Yes	5.802	-5.5388	1.71431	-3.23092	0.00123393	0.0188802	other	intronic	0	0	0	0	0	0	0	0	0	0	1	2	0	0
wt_saf_neg_peak_49258	chr14	46937500	46937682	-	183	18	9	8	16	0	1	0	1	Yes	0.48453	0.266545	0.2404	0.217146	0	0.031047	0	0.0661091	N/A	No	0.330492	0.0155235	Yes	6.30901	-4.16141	1.69002	-2.46234	0.0138034	0.106773	other	intronic	0	0	1	0	0	0	0	0	0	0	0	1	0	0
wt_saf_neg_peak_49259	chr14	47026659	47026797	-	139	21	12	8	4	0	0	0	1	Yes	0.565285	0.355393	0.2404	0.0542865	0	0	0	0.0661091	N/A	Yes	0.387026	0	Yes	7.10226	-5.83382	1.68512	-3.46197	0.000536238	0.00984985	other	intronic	0	1	1	0	0	0	0	0	0	0	0	0	0	0
wt_saf_neg_peak_49371	chr14	48746120	48746309	-	190	22	18	15	0	4	3	0	0	Yes	0.592203	0.53309	0.450751	0	0.121419	0.0931411	0	0	N/A	Yes	0.525348	0.10728	Yes	11.2098	-2.02426	0.852142	-2.3755	0.0175253	0.124871	other	intronic	0	0	1	0	0	0	0	0	0	0	1	0	0	0
wt_saf_neg_peak_49425	chr14	49705387	49706212	-	826	22	15	11	6	1	2	0	3	Yes	0.592203	0.444242	0.330551	0.0814298	0.0303548	0.0620941	0	0.198327	N/A	Yes	0.455665	0.0462245	Yes	9.04335	-3.03578	1.1151	-2.72241	0.00648067	0.0640743	protein_coding	intronic	0	2	0	0	0	0	0	0	0	0	1	0	0	0
wt_saf_neg_peak_49426	chr14	49713131	49713436	-	306	16	15	5	5	0	0	0	0	Yes	0.430693	0.444242	0.15025	0.0678582	0	0	0	0	N/A	Yes	0.341728	0	Yes	6.23562	-5.64608	1.72332	-3.27628	0.00105185	0.0166779	protein_coding	exonic	0	0	0	0	0	0	0	0	0	0	1	0	0	0
wt_saf_neg_peak_49514	chr14	51989603	51989857	-	255	11	8	8	27	1	1	0	2	Yes	0.296102	0.236929	0.2404	0.366434	0.0303548	0.031047	0	0.132218	N/A	No	0.25781	0.030701	Yes	5.1868	-2.8037	1.39111	-2.01544	0.0438587	0.228167	other	intronic	0	0	0	0	0	0	0	0	0	0	0	0	0	0
wt_saf_neg_peak_49720	chr14	54582589	54582785	-	197	11	11	6	9	0	0	0	3	Yes	0.296102	0.325777	0.1803	0.122145	0	0	0	0.198327	N/A	Yes	0.267393	0	Yes	4.88718	-5.293	1.76753	-2.99457	0.00274831	0.0345985	other	intronic	0	0	0	0	0	0	0	0	0	0	0	0	0	0
wt_saf_neg_peak_49734	chr14	54610277	54610353	-	77	6	3	9	4	0	0	0	0	Yes	0.16151	0.0888484	0.270451	0.0542865	0	0	0	0	N/A	Yes	0.173603	0	Yes	3.20997	-4.68146	1.93086	-2.42454	0.0153277	0.114348	other	intronic	0	0	0	0	0	0	0	0	0	0	0	1	0	0
wt_saf_neg_peak_49859	chr14	55696592	55697533	-	942	58	65	76	73	35	22	0	4	Yes	1.56126	1.92505	2.28381	0.990729	1.06242	0.683035	0	0.264436	N/A	No	1.92337	0.872727	Yes	48.1058	-0.872468	0.402351	-2.16843	0.0301262	0.178577	other	intronic	0	0	0	2	0	0	0	0	0	0	0	0	0	0
wt_saf_neg_peak_49875	chr14	55737684	55738045	-	362	8	10	4	9	0	0	0	4	Yes	0.215347	0.296161	0.1202	0.122145	0	0	0	0.264436	N/A	No	0.210569	0	Yes	3.83775	-4.9444	1.85214	-2.66956	0.00759501	0.0715986	other	intronic	0	0	0	0	0	0	0	0	0	0	0	0	0	0
wt_saf_neg_peak_49904	chr14	56525048	56525215	-	168	6	11	4	5	0	0	0	4	Yes	0.16151	0.325777	0.1202	0.0678582	0	0	0	0.264436	N/A	Yes	0.202496	0	Yes	3.68043	-4.88296	1.87301	-2.60701	0.00913363	0.0811913	other	intronic	0	0	0	0	0	0	0	0	0	0	0	0	0	0
wt_saf_neg_peak_49995	chr14	57050250	57050406	-	157	1	5	8	0	0	0	0	0	Yes	0.0269183	0.148081	0.2404	0	0	0	0	0	N/A	Yes	0.138466	0	Yes	2.54176	-4.34132	2.08277	-2.0844	0.0371239	NA	protein_coding	intronic	0	0	0	0	0	0	0	0	0	0	0	1	0	0
wt_saf_neg_peak_50001	chr14	57283836	57284727	-	892	21	29	21	4	6	2	0	4	Yes	0.565285	0.858867	0.631051	0.0542865	0.182129	0.0620941	0	0.264436	N/A	Yes	0.685068	0.122112	Yes	14.3036	-2.21523	0.790808	-2.80122	0.00509094	0.0541183	protein_coding	intronic	0	0	0	0	0	0	0	0	0	0	0	0	0	0
wt_saf_neg_peak_50033	chr14	57507082	57507289	-	208	6	8	10	1	1	0	0	3	Yes	0.16151	0.236929	0.300501	0.0135716	0.0303548	0	0	0.198327	N/A	Yes	0.23298	0.0151774	Yes	4.49485	-3.65714	1.77137	-2.06459	0.0389621	0.211471	lncRNA	exonic	0	0	0	0	0	0	0	0	0	0	0	0	0	0
wt_saf_neg_peak_50040	chr14	57523607	57523685	-	79	10	9	9	6	0	1	0	4	Yes	0.269183	0.266545	0.270451	0.0814298	0	0.031047	0	0.264436	N/A	Yes	0.268726	0.0155235	Yes	5.16393	-3.85612	1.72403	-2.23669	0.0253067	0.158879	other	intronic	0	0	0	0	0	0	0	0	0	0	0	0	0	0
wt_saf_neg_peak_50116	chr14	57705465	57707129	-	1665	68	16	44	44	13	13	0	4	Yes	1.83045	0.473858	1.3222	0.597152	0.394613	0.403612	0	0.264436	N/A	Yes	1.20884	0.399112	Yes	28.2509	-1.34317	0.600128	-2.23814	0.0252116	0.158497	protein_coding	intronic	1	0	0	1	0	0	0	0	0	0	0	1	0	0
wt_saf_neg_peak_50213	chr14	59288315	59288535	-	221	5	4	6	0	0	0	0	0	Yes	0.134592	0.118465	0.1803	0	0	0	0	0	N/A	Yes	0.144452	0	Yes	2.65796	-4.41065	1.99055	-2.2158	0.0267055	NA	protein_coding	intronic	0	0	0	0	0	0	0	0	0	0	1	1	0	0
wt_saf_neg_peak_50261	chr14	59546508	59546899	-	392	9	9	5	0	0	0	0	0	Yes	0.242265	0.266545	0.15025	0	0	0	0	0	N/A	Yes	0.219687	0	Yes	4.01561	-5.00956	1.82816	-2.74022	0.00613984	0.0616908	other	intronic	0	0	0	0	0	0	0	0	0	0	0	0	0	0
wt_saf_neg_peak_50280	chr14	59718647	59718786	-	140	7	5	4	0	0	0	0	0	Yes	0.188428	0.148081	0.1202	0	0	0	0	0	N/A	Yes	0.152236	0	Yes	2.79258	-4.48558	1.9677	-2.2796	0.0226311	NA	protein_coding	intronic	0	0	0	0	0	0	0	0	0	0	0	0	0	0
wt_saf_neg_peak_50288	chr14	59943722	59943969	-	248	15	14	9	0	0	0	0	0	Yes	0.403775	0.414626	0.270451	0	0	0	0	0	N/A	Yes	0.36295	0	Yes	6.64167	-5.73521	1.68696	-3.39973	0.000674533	0.0118247	protein_coding	intronic	0	0	0	0	0	0	0	0	0	0	0	0	0	0
wt_saf_neg_peak_50289	chr14	59944323	59944684	-	362	6	10	4	2	0	0	0	2	Yes	0.16151	0.296161	0.1202	0.0271433	0	0	0	0.132218	N/A	Yes	0.192624	0	Yes	3.50471	-4.81241	1.88664	-2.55078	0.0107481	0.0905756	protein_coding	intronic	1	0	0	1	0	0	0	0	0	0	0	0	0	0
wt_saf_neg_peak_50295	chr14	60017561	60017677	-	117	7	3	5	5	0	0	0	0	Yes	0.188428	0.0888484	0.15025	0.0678582	0	0	0	0	N/A	Yes	0.142509	0	Yes	2.6282	-4.39704	2.00421	-2.1939	0.0282424	NA	protein_coding	exonic	0	0	0	0	0	0	0	0	0	0	0	0	0	0
wt_saf_neg_peak_50307	chr14	60214910	60215120	-	211	19	17	25	8	6	3	0	3	Yes	0.511448	0.503474	0.751252	0.108573	0.182129	0.0931411	0	0.198327	N/A	Yes	0.588725	0.137635	Yes	12.8436	-1.83113	0.7928	-2.30971	0.0209044	0.139543	protein_coding	exonic	0	0	0	0	0	0	0	0	0	0	0	0	0	0
wt_saf_neg_peak_50347	chr14	60975064	60975313	-	250	10	3	14	17	0	1	0	4	Yes	0.269183	0.0888484	0.420701	0.230718	0	0.031047	0	0.264436	N/A	No	0.259578	0.0155235	Yes	5.04492	-3.81713	1.77448	-2.15113	0.0314662	0.183813	protein_coding	intronic	0	0	0	1	0	0	0	0	0	0	1	0	0	0
wt_saf_neg_peak_50365	chr14	61004603	61004719	-	117	1	10	8	8	0	0	0	0	Yes	0.0269183	0.296161	0.2404	0.108573	0	0	0	0	N/A	Yes	0.187827	0	Yes	3.4204	-4.77178	1.96617	-2.42694	0.0152268	0.113838	protein_coding	intronic	0	0	0	0	0	0	0	0	0	0	0	1	0	0
wt_saf_neg_peak_50383	chr14	61334065	61334443	-	379	5	16	17	8	0	1	0	1	Yes	0.134592	0.473858	0.510851	0.108573	0	0.031047	0	0.0661091	N/A	Yes	0.3731	0.0155235	Yes	7.05802	-4.32145	1.68923	-2.55823	0.0105206	0.0893014	protein_coding	UTR3	0	0	0	0	0	0	0	0	0	0	0	1	0	0
wt_saf_neg_peak_50452	chr14	61616234	61616605	-	372	14	4	9	8	0	0	0	4	Yes	0.376857	0.118465	0.270451	0.108573	0	0	0	0.264436	N/A	Yes	0.255257	0	Yes	4.71786	-5.24161	1.79951	-2.91279	0.00358214	0.0421665	lncRNA	intronic	0	0	0	1	0	0	0	0	0	0	1	0	0	0
wt_saf_neg_peak_50470	chr14	61651785	61651871	-	87	17	8	5	6	0	0	0	3	Yes	0.457612	0.236929	0.15025	0.0814298	0	0	0	0.198327	N/A	Yes	0.281597	0	Yes	5.17204	-5.37726	1.77247	-3.03377	0.00241516	0.0314106	lncRNA	intronic	0	1	0	0	0	0	0	0	0	0	0	0	0	0
wt_saf_neg_peak_50483	chr14	61680544	61680775	-	232	23	6	9	10	3	1	0	0	Yes	0.619122	0.177697	0.270451	0.135716	0.0910646	0.031047	0	0	N/A	No	0.355756	0.0610558	Yes	7.45898	-2.28932	1.13221	-2.02199	0.0431776	0.225973	lncRNA	exonic	0	0	0	0	0	0	0	0	0	0	0	0	0	0
wt_saf_neg_peak_50492	chr14	62379077	62379165	-	89	4	5	7	4	0	0	0	0	Yes	0.107673	0.148081	0.21035	0.0542865	0	0	0	0	N/A	Yes	0.155368	0	Yes	2.85424	-4.51191	1.9634	-2.29801	0.0215614	NA	other	intronic	0	0	0	0	0	0	0	0	0	0	1	0	0	0
wt_saf_neg_peak_50497	chr14	62686246	62686375	-	130	18	18	15	3	1	4	0	4	Yes	0.48453	0.53309	0.450751	0.0407149	0.0303548	0.124188	0	0.264436	N/A	Yes	0.489457	0.0772715	Yes	10.1197	-2.39151	0.953913	-2.50705	0.0121743	0.0985012	protein_coding	UTR3	0	0	0	0	0	0	0	0	0	0	0	0	0	0
wt_saf_neg_peak_50525	chr14	62734450	62735016	-	567	54	34	44	33	21	10	0	4	Yes	1.45359	1.00695	1.3222	0.447864	0.637452	0.31047	0	0.264436	N/A	Yes	1.26091	0.473961	Yes	30.1355	-1.15119	0.51066	-2.25431	0.0241768	0.154043	protein_coding	intronic	0	0	0	0	0	0	0	0	0	0	0	3	0	0
wt_saf_neg_peak_50576	chr14	63255136	63255450	-	315	13	17	12	14	0	1	0	0	Yes	0.349938	0.503474	0.360601	0.190003	0	0.031047	0	0	N/A	No	0.404671	0.0155235	Yes	7.63054	-4.44279	1.64059	-2.70805	0.00676798	0.0660697	other	intronic	0	0	0	0	0	0	0	0	0	0	0	2	0	0
wt_saf_neg_peak_50588	chr14	63516337	63516474	-	138	12	3	14	3	0	0	0	3	Yes	0.32302	0.0888484	0.420701	0.0407149	0	0	0	0.198327	N/A	Yes	0.277523	0	Yes	5.14446	-5.36324	1.79411	-2.98935	0.0027957	0.0350435	other	intronic	0	1	0	0	0	0	0	0	0	0	0	0	0	0
wt_saf_neg_peak_50664	chr14	64382194	64383096	-	903	15	18	17	5	3	5	0	0	Yes	0.403775	0.53309	0.510851	0.0678582	0.0910646	0.155235	0	0	N/A	Yes	0.482572	0.12315	Yes	10.6662	-1.69667	0.845402	-2.00694	0.0447561	0.230939	protein_coding	intronic	1	0	0	0	0	0	0	0	0	0	0	0	0	0
wt_saf_neg_peak_50735	chr14	64889219	64889381	-	163	8	6	5	5	0	0	0	0	Yes	0.215347	0.177697	0.15025	0.0678582	0	0	0	0	N/A	Yes	0.181098	0	Yes	3.3219	-4.73559	1.89332	-2.5012	0.0123772	0.0994701	protein_coding	intronic	0	0	0	0	0	0	0	0	0	0	0	1	0	0
wt_saf_neg_peak_50816	chr14	65196653	65196777	-	125	5	3	11	2	0	0	0	0	Yes	0.134592	0.0888484	0.330551	0.0271433	0	0	0	0	N/A	Yes	0.184664	0	Yes	3.4176	-4.77011	1.92055	-2.48372	0.0130019	0.102634	protein_coding	UTR3	0	0	0	0	0	0	0	0	0	0	0	1	0	0
wt_saf_neg_peak_50897	chr14	65945625	65946012	-	388	12	11	9	4	0	0	0	1	Yes	0.32302	0.325777	0.270451	0.0542865	0	0	0	0.0661091	N/A	Yes	0.306416	0	Yes	5.61492	-5.492	1.7232	-3.18709	0.00143711	0.0212016	protein_coding	intronic	0	0	0	0	0	0	0	0	0	0	0	0	0	0
wt_saf_neg_peak_50999	chr14	66850272	66850346	-	75	2	8	6	20	0	0	0	0	Yes	0.0538367	0.236929	0.1803	0.271433	0	0	0	0	N/A	No	0.157022	0	Yes	2.86132	-4.51523	1.99237	-2.26626	0.0234356	NA	protein_coding	intronic	0	0	0	0	0	0	0	0	0	0	0	0	0	0
wt_saf_neg_peak_51012	chr14	66876171	66876596	-	426	2	24	8	0	1	1	0	1	Yes	0.0538367	0.710787	0.2404	0	0.0303548	0.031047	0	0.0661091	N/A	Yes	0.335008	0.030701	Yes	6.49979	-3.15392	1.44111	-2.18854	0.0286301	0.172739	other	intronic	0	0	0	0	0	0	0	0	0	0	0	1	0	0
wt_saf_neg_peak_51015	chr14	66880356	66880831	-	476	6	15	9	0	0	0	0	0	Yes	0.16151	0.444242	0.270451	0	0	0	0	0	N/A	Yes	0.292067	0	Yes	5.31872	-5.41154	1.75697	-3.08004	0.00206973	0.0279883	other	intronic	0	1	0	0	0	0	0	0	0	0	1	1	0	0
wt_saf_neg_peak_51022	chr14	66894936	66895030	-	95	1	5	8	6	0	0	0	0	Yes	0.0269183	0.148081	0.2404	0.0814298	0	0	0	0	N/A	No	0.138466	0	Yes	2.54176	-4.34132	2.08277	-2.0844	0.0371239	NA	other	intronic	0	1	0	0	0	0	0	0	0	0	0	0	0	0
wt_saf_neg_peak_51033	chr14	66950699	66951301	-	603	15	16	10	12	3	0	0	2	Yes	0.403775	0.473858	0.300501	0.16286	0.0910646	0	0	0.132218	N/A	Yes	0.392711	0.0455323	Yes	7.83769	-2.83576	1.1702	-2.42331	0.0153798	0.114621	other	intronic	0	1	0	0	0	0	0	0	0	0	0	2	0	0
wt_saf_neg_peak_51221	chr14	68086660	68086854	-	195	12	28	6	26	1	1	0	0	Yes	0.32302	0.829251	0.1803	0.352863	0.0303548	0.031047	0	0	N/A	No	0.44419	0.030701	Yes	8.49375	-3.56865	1.32055	-2.70239	0.00688425	0.0668387	protein_coding	intronic	0	0	1	0	0	0	0	0	0	0	0	0	0	0
wt_saf_neg_peak_51228	chr14	69163469	69163615	-	147	1	10	5	3	0	0	0	1	Yes	0.0269183	0.296161	0.15025	0.0407149	0	0	0	0.0661091	N/A	Yes	0.157777	0	Yes	2.85918	-4.51465	2.03801	-2.21522	0.0267446	NA	other	intronic	0	1	0	0	0	0	0	0	0	0	0	0	0	0
wt_saf_neg_peak_51280	chr14	70178047	70178227	-	181	11	5	4	0	0	0	0	0	Yes	0.296102	0.148081	0.1202	0	0	0	0	0	N/A	Yes	0.188128	0	Yes	3.45866	-4.79621	1.89592	-2.52975	0.0114143	0.0944045	other	intronic	0	0	0	1	0	0	0	0	0	0	0	0	0	0
wt_saf_neg_peak_51295	chr14	70232964	70233149	-	186	12	5	1	0	0	0	0	0	Yes	0.32302	0.148081	0.0300501	0	0	0	0	0	N/A	Yes	0.16705	0	Yes	3.06396	-4.62419	2.00998	-2.30061	0.0214135	0.141724	protein_coding	intronic	0	0	1	0	0	0	0	0	0	0	0	0	0	0
wt_saf_neg_peak_51358	chr14	70472043	70472467	-	425	13	13	1	4	0	1	0	0	Yes	0.349938	0.38501	0.0300501	0.0542865	0	0.031047	0	0	N/A	Yes	0.254999	0.0155235	Yes	4.86981	-3.77079	1.82657	-2.06441	0.038979	0.21155	other	intronic	0	0	0	0	0	0	0	0	0	0	0	1	0	0
wt_saf_neg_peak_51366	chr14	70488847	70489605	-	759	33	24	17	41	11	3	0	2	Yes	0.888305	0.710787	0.510851	0.556437	0.333903	0.0931411	0	0.132218	N/A	No	0.703314	0.213522	Yes	16.0042	-1.45791	0.713887	-2.04222	0.0411299	0.218779	protein_coding	intronic	0	0	0	0	0	0	0	0	0	0	0	0	0	0
wt_saf_neg_peak_51437	chr14	70710555	70710637	-	83	8	8	11	14	0	2	0	0	Yes	0.215347	0.236929	0.330551	0.190003	0	0.0620941	0	0	N/A	No	0.260942	0.031047	Yes	5.2628	-2.80348	1.41079	-1.98717	0.0469037	0.23787	protein_coding	intronic	0	0	0	0	0	0	0	0	0	0	0	1	0	0
wt_saf_neg_peak_51563	chr14	72828258	72828576	-	319	11	7	7	14	1	0	0	4	Yes	0.296102	0.207313	0.21035	0.190003	0.0303548	0	0	0.264436	N/A	No	0.237922	0.0151774	Yes	4.5905	-3.69371	1.76138	-2.09706	0.0359886	0.200926	other	intronic	0	0	0	1	0	0	0	0	0	0	0	0	0	0
wt_saf_neg_peak_51565	chr14	72837425	72837597	-	173	19	21	11	19	2	5	0	1	Yes	0.511448	0.621938	0.330551	0.257861	0.0607097	0.155235	0	0.0661091	N/A	No	0.487979	0.107972	Yes	10.5178	-1.90041	0.887314	-2.14175	0.0322134	0.18672	other	intronic	0	0	0	0	0	0	0	0	0	0	1	0	0	0
wt_saf_neg_peak_51591	chr14	73218743	73218819	-	77	7	3	6	5	0	0	0	0	Yes	0.188428	0.0888484	0.1803	0.0678582	0	0	0	0	N/A	Yes	0.152526	0	Yes	2.81527	-4.49523	1.97466	-2.27646	0.0228183	NA	protein_coding	intronic	0	0	0	0	0	0	0	0	0	0	0	1	0	0
wt_saf_neg_peak_51617	chr14	73264352	73264670	-	319	7	10	11	28	0	1	0	3	Yes	0.188428	0.296161	0.330551	0.380006	0	0.031047	0	0.198327	N/A	No	0.271713	0.0155235	Yes	5.21424	-3.86815	1.72834	-2.23807	0.0252166	0.15851	protein_coding	intronic	0	0	0	0	0	0	0	0	0	0	0	0	0	0
wt_saf_neg_peak_51661	chr14	73589700	73589906	-	207	54	47	24	10	12	17	0	3	Yes	1.45359	1.39196	0.721202	0.135716	0.364258	0.5278	0	0.198327	N/A	Yes	1.18892	0.446029	Yes	28.3405	-1.14168	0.534089	-2.13763	0.0325471	0.188	other	intronic	0	1	0	0	0	0	0	0	0	0	1	0	0	0
wt_saf_neg_peak_51669	chr14	74747420	74747736	-	317	6	5	7	0	0	0	0	2	Yes	0.16151	0.148081	0.21035	0	0	0	0	0.132218	N/A	Yes	0.173314	0	Yes	3.18728	-4.67284	1.91049	-2.44589	0.0144496	0.110102	other	intronic	0	0	0	0	0	0	0	0	0	0	0	0	0	0
wt_saf_neg_peak_51907	chr14	76484665	76484971	-	307	18	23	15	8	3	6	0	2	Yes	0.48453	0.681171	0.450751	0.108573	0.0910646	0.186282	0	0.132218	N/A	Yes	0.538817	0.138673	Yes	11.9037	-1.68157	0.808062	-2.081	0.0374343	0.206045	other	intronic	0	1	0	0	0	0	0	0	0	0	1	0	0	0
wt_saf_neg_peak_51964	chr14	77821478	77821756	-	279	13	6	6	3	0	0	0	0	Yes	0.349938	0.177697	0.1803	0.0407149	0	0	0	0	N/A	Yes	0.235979	0	Yes	4.34158	-5.12325	1.81103	-2.82891	0.00467062	0.050955	protein_coding	UTR3	0	0	0	1	0	0	0	0	0	0	0	0	0	0
wt_saf_neg_peak_51986	chr14	77873841	77874497	-	657	57	17	18	14	1	2	0	3	Yes	1.53435	0.503474	0.540901	0.190003	0.0303548	0.0620941	0	0.198327	N/A	Yes	0.859573	0.0462245	Yes	16.5325	-3.96088	1.05226	-3.76416	0.000167111	0.0038031	protein_coding	intronic	1	0	1	0	0	0	0	0	0	0	1	2	0	0
wt_saf_neg_peak_51988	chr14	78278533	78278985	-	453	14	12	7	38	2	1	0	0	Yes	0.376857	0.355393	0.21035	0.515722	0.0607097	0.031047	0	0	N/A	No	0.3142	0.0458784	Yes	6.42137	-2.50646	1.2037	-2.0823	0.0373155	0.205614	protein_coding	UTR3	0	0	0	0	0	0	0	0	0	0	0	0	0	0
wt_saf_neg_peak_51997	chr14	78489380	78489464	-	85	10	2	11	10	0	0	0	1	Yes	0.269183	0.0592322	0.330551	0.135716	0	0	0	0.0661091	N/A	No	0.219655	0	Yes	4.07447	-5.0271	1.8732	-2.6837	0.00728122	0.069515	other	intronic	0	1	0	0	0	0	0	0	0	0	0	0	0	0
wt_saf_neg_peak_52018	chr14	78530020	78530294	-	275	4	7	6	0	0	0	0	0	Yes	0.107673	0.207313	0.1803	0	0	0	0	0	N/A	Yes	0.165096	0	Yes	3.01863	-4.59384	1.93804	-2.37035	0.0177712	0.125857	protein_coding	intronic	0	1	0	0	0	0	0	0	0	0	0	0	0	0
wt_saf_neg_peak_52208	chr14	86646329	86646465	-	137	7	6	3	3	0	0	0	4	Yes	0.188428	0.177697	0.0901502	0.0407149	0	0	0	0.264436	N/A	Yes	0.152092	0	Yes	2.78124	-4.48069	1.97715	-2.26623	0.0234373	NA	other	intronic	0	0	0	0	0	0	0	0	0	0	0	0	0	0
wt_saf_neg_peak_52290	chr14	86830277	86830351	-	75	7	8	4	1	0	0	0	0	Yes	0.188428	0.236929	0.1202	0.0135716	0	0	0	0	N/A	Yes	0.181853	0	Yes	3.31977	-4.73486	1.89922	-2.49306	0.0126649	0.100955	protein_coding	intronic	0	0	0	0	0	0	0	0	0	0	0	0	0	0
wt_saf_neg_peak_52443	chr14	87415988	87416780	-	793	17	20	9	18	2	1	0	3	Yes	0.457612	0.592322	0.270451	0.244289	0.0607097	0.031047	0	0.198327	N/A	No	0.440128	0.0458784	Yes	8.70091	-2.98687	1.13061	-2.64183	0.00824586	0.0757787	other	intronic	0	0	2	0	0	0	0	0	0	0	0	0	0	0
wt_saf_neg_peak_52463	chr14	94114968	94115055	-	88	10	3	6	2	0	0	0	0	Yes	0.269183	0.0888484	0.1803	0.0271433	0	0	0	0	N/A	Yes	0.179444	0	Yes	3.31483	-4.73281	1.91765	-2.46802	0.0135862	0.105685	other	intronic	0	0	0	0	0	0	0	0	0	0	1	0	0	0
wt_saf_neg_peak_52505	chr14	99064406	99064554	-	149	5	4	7	1	0	0	0	3	Yes	0.134592	0.118465	0.21035	0.0135716	0	0	0	0.198327	N/A	Yes	0.154469	0	Yes	2.84503	-4.50796	1.96402	-2.29527	0.0217176	NA	other	intronic	0	1	0	0	0	0	0	0	0	0	0	0	0	0
wt_saf_neg_peak_52536	chr14	99347937	99348370	-	434	8	13	6	3	0	0	0	2	Yes	0.215347	0.38501	0.1803	0.0407149	0	0	0	0.132218	N/A	Yes	0.260219	0	Yes	4.73908	-5.24733	1.78194	-2.94473	0.00323238	0.0391063	other	intronic	0	0	0	0	0	0	0	0	0	0	0	0	0	0
wt_saf_neg_peak_52552	chr14	99883456	99883530	-	75	8	3	5	6	0	0	0	0	Yes	0.215347	0.0888484	0.15025	0.0814298	0	0	0	0	N/A	No	0.151482	0	Yes	2.79472	-4.48637	1.98044	-2.26535	0.0234914	NA	protein_coding	intronic	0	0	0	0	0	0	0	0	0	0	0	1	0	0
wt_saf_neg_peak_52556	chr14	99891544	99891650	-	107	11	11	8	3	0	1	0	2	Yes	0.296102	0.325777	0.2404	0.0407149	0	0.031047	0	0.132218	N/A	Yes	0.287426	0.0155235	Yes	5.49483	-3.95115	1.70979	-2.31089	0.0208389	0.139249	protein_coding	intronic	0	0	0	0	0	0	0	0	0	0	0	0	0	0
wt_saf_neg_peak_52765	chr14	101487094	101487893	-	800	15	19	19	24	6	0	0	1	Yes	0.403775	0.562706	0.570951	0.325719	0.182129	0	0	0.0661091	N/A	No	0.512478	0.0910646	Yes	10.706	-2.22557	0.949661	-2.34354	0.0191017	0.131637	protein_coding	intronic	0	0	0	0	0	0	0	0	0	0	0	1	0	0
wt_saf_neg_peak_52767	chr14	101491157	101491464	-	308	7	14	9	11	1	0	0	3	Yes	0.188428	0.414626	0.270451	0.149288	0.0303548	0	0	0.198327	N/A	No	0.291168	0.0151774	Yes	5.52867	-3.97085	1.71993	-2.30873	0.0209586	0.139761	protein_coding	intronic	0	0	0	0	0	0	0	0	0	0	0	0	0	0
wt_saf_neg_peak_52786	chr14	101541724	101542109	-	386	14	8	8	10	0	2	0	1	Yes	0.376857	0.236929	0.2404	0.135716	0	0.0620941	0	0.0661091	N/A	No	0.284729	0.031047	Yes	5.7007	-2.93482	1.38794	-2.11452	0.034471	0.19538	protein_coding	intronic	0	0	0	0	0	0	0	0	0	0	0	0	0	0
wt_saf_neg_peak_52801	chr14	101569678	101570528	-	851	27	16	18	11	4	3	0	0	Yes	0.726795	0.473858	0.540901	0.149288	0.121419	0.0931411	0	0	N/A	Yes	0.580518	0.10728	Yes	12.2522	-2.17254	0.838163	-2.59203	0.00954124	0.0836436	protein_coding	intronic	0	0	0	0	0	0	0	0	0	0	0	1	0	0
wt_saf_neg_peak_52802	chr14	101573613	101573687	-	75	6	2	5	3	0	0	0	0	Yes	0.16151	0.0592322	0.15025	0.0407149	0	0	0	0	N/A	Yes	0.123664	0	Yes	2.28595	-4.19488	2.08388	-2.01301	0.0441134	NA	protein_coding	intronic	0	0	0	1	0	0	0	0	0	0	0	0	0	0
wt_saf_neg_peak_52962	chr14	104471617	104471834	-	218	7	0	7	0	0	0	0	0	Yes	0.188428	0	0.21035	0	0	0	0	0	N/A	Yes	0.132926	0	Yes	2.47516	-4.3085	2.19641	-1.96161	0.0498078	NA	other	intronic	0	0	0	0	0	0	0	0	0	0	0	0	0	0
wt_saf_neg_peak_53045	chr14	105878453	105878787	-	335	8	1	9	0	0	0	0	3	Yes	0.215347	0.0296161	0.270451	0	0	0	0	0.198327	N/A	Yes	0.171804	0	Yes	3.19155	-4.67457	1.9864	-2.35329	0.018608	0.129401	other	intronic	0	1	0	0	0	0	0	0	0	0	0	0	0	0
wt_saf_neg_peak_53047	chr14	105885719	105885835	-	117	5	3	8	0	0	0	0	0	Yes	0.134592	0.0888484	0.2404	0	0	0	0	0	N/A	Yes	0.154613	0	Yes	2.85638	-4.51281	1.97602	-2.28379	0.0223841	NA	other	intronic	0	0	0	1	0	0	0	0	0	0	0	0	0	0
wt_saf_neg_peak_53076	chr14	114104492	114105194	-	703	16	9	14	5	1	0	0	3	Yes	0.430693	0.266545	0.420701	0.0678582	0.0303548	0	0	0.198327	N/A	Yes	0.372646	0.0151774	Yes	7.08408	-4.34203	1.66026	-2.61528	0.00891554	0.079905	other	intronic	0	0	0	4	0	0	0	0	0	0	1	0	0	0
wt_saf_neg_peak_53087	chr14	115205958	115206219	-	262	14	6	3	2	0	0	0	0	Yes	0.376857	0.177697	0.0901502	0.0271433	0	0	0	0	N/A	Yes	0.214901	0	Yes	3.94687	-4.98818	1.86939	-2.66834	0.00762265	0.071749	other	intronic	0	0	0	1	0	0	0	0	0	0	0	0	0	0
wt_saf_neg_peak_53095	chr14	116990587	116990793	-	207	6	6	1	0	0	0	0	0	Yes	0.16151	0.177697	0.0300501	0	0	0	0	0	N/A	Yes	0.123086	0	Yes	2.24057	-4.17059	2.12625	-1.96148	0.0498234	NA	other	intronic	0	1	0	0	0	0	0	0	0	0	0	0	0	0
wt_saf_neg_peak_53235	chr14	118872930	118873197	-	268	16	26	16	11	8	1	0	3	Yes	0.430693	0.770019	0.480801	0.149288	0.242839	0.031047	0	0.198327	N/A	Yes	0.560504	0.136943	Yes	12.2132	-1.7623	0.846502	-2.08187	0.0373548	0.205743	other	intronic	0	0	0	1	0	0	0	0	0	0	0	0	0	0
wt_saf_neg_peak_53286	chr14	119010091	119010290	-	200	15	11	12	13	2	1	0	3	Yes	0.403775	0.325777	0.360601	0.176431	0.0607097	0.031047	0	0.198327	N/A	Yes	0.363384	0.0458784	Yes	7.34753	-2.71913	1.15835	-2.34741	0.0189043	0.130752	protein_coding	intronic	0	1	0	0	0	0	0	0	0	0	0	1	0	0
wt_saf_neg_peak_53289	chr14	119019475	119019549	-	75	9	8	13	15	1	1	0	3	Yes	0.242265	0.236929	0.390651	0.203574	0.0303548	0.031047	0	0.198327	N/A	No	0.289948	0.030701	Yes	5.78913	-2.9726	1.36683	-2.17481	0.029644	0.176721	protein_coding	exonic	0	0	0	0	0	0	0	0	0	0	0	0	0	0
wt_saf_neg_peak_53378	chr14	121304398	121305099	-	702	60	31	21	28	9	12	0	4	Yes	1.6151	0.9181	0.631051	0.380006	0.273194	0.372565	0	0.264436	N/A	Yes	1.05475	0.322879	Yes	24.1418	-1.4426	0.603599	-2.39	0.0168484	0.121715	protein_coding	intronic	0	0	1	2	0	0	0	0	0	0	0	0	0	0
wt_saf_neg_peak_53491	chr14	121643091	121643251	-	161	11	19	16	18	0	6	0	3	Yes	0.296102	0.562706	0.480801	0.244289	0	0.186282	0	0.198327	N/A	No	0.446536	0.0931411	Yes	9.56475	-1.97839	0.994605	-1.98913	0.0466873	0.237174	protein_coding	intronic	0	0	0	0	0	0	0	0	0	0	0	0	0	0
wt_saf_neg_peak_53509	chr14	121694000	121694142	-	143	9	6	4	0	0	0	0	0	Yes	0.242265	0.177697	0.1202	0	0	0	0	0	N/A	Yes	0.180054	0	Yes	3.30135	-4.72807	1.90327	-2.48418	0.012985	0.102552	protein_coding	intronic	0	0	0	0	0	0	0	0	0	0	0	0	0	0
wt_saf_neg_peak_53586	chr14	122404544	122404762	-	219	10	6	3	9	0	0	0	2	Yes	0.269183	0.177697	0.0901502	0.122145	0	0	0	0.132218	N/A	No	0.17901	0	Yes	3.28079	-4.72042	1.91924	-2.45952	0.0139121	0.107376	lncRNA	intronic	0	0	0	0	0	0	0	0	0	1	0	1	0	0
wt_saf_neg_peak_53623	chr14	122862308	122862653	-	346	7	6	1	0	0	0	0	4	Yes	0.188428	0.177697	0.0300501	0	0	0	0	0.264436	N/A	Yes	0.132058	0	Yes	2.40709	-4.27447	2.09359	-2.04169	0.0411823	NA	protein_coding	intronic	0	0	0	1	0	0	0	0	0	0	0	0	0	0
wt_saf_neg_peak_53670	chr14	123373774	123374146	-	373	10	10	2	0	0	0	0	0	Yes	0.269183	0.296161	0.0601001	0	0	0	0	0	N/A	Yes	0.208481	0	Yes	3.79664	-4.93103	1.88847	-2.61113	0.00902434	0.0804831	protein_coding	intronic	0	0	0	0	0	0	0	0	0	0	0	0	0	0
wt_saf_neg_peak_53680	chr14	123477652	123478246	-	595	8	8	3	8	0	0	0	1	Yes	0.215347	0.236929	0.0901502	0.108573	0	0	0	0.0661091	N/A	No	0.180809	0	Yes	3.29921	-4.7273	1.91263	-2.47162	0.0134501	0.104996	protein_coding	intronic	0	1	0	0	0	0	0	0	0	0	0	0	0	0
wt_saf_neg_peak_53699	chr14	123607867	123607949	-	83	6	5	2	0	0	0	0	0	Yes	0.16151	0.148081	0.0601001	0	0	0	0	0	N/A	Yes	0.12323	0	Yes	2.25191	-4.17691	2.08823	-2.00022	0.0454764	NA	protein_coding	intronic	0	0	0	0	0	0	0	0	0	0	0	0	0	0
wt_saf_neg_peak_53700	chr14	123616113	123616919	-	807	28	19	25	16	7	3	0	4	Yes	0.753713	0.562706	0.751252	0.217146	0.212484	0.0931411	0	0.264436	N/A	Yes	0.689224	0.152812	Yes	14.9129	-1.91024	0.743977	-2.5676	0.0102405	0.0877092	protein_coding	intronic	0	0	1	0	0	0	0	0	0	0	0	0	0	0
wt_saf_neg_peak_53717	chr15	3327021	3327232	-	212	3	10	6	18	0	0	0	0	Yes	0.080755	0.296161	0.1803	0.244289	0	0	0	0	N/A	No	0.185739	0	Yes	3.37929	-4.75648	1.91475	-2.48412	0.0129871	0.102552	protein_coding	intronic	0	1	0	0	0	0	0	0	0	0	0	0	0	0
wt_saf_neg_peak_53718	chr15	3327611	3328134	-	524	15	13	11	0	0	0	0	0	Yes	0.403775	0.38501	0.330551	0	0	0	0	0	N/A	Yes	0.373112	0	Yes	6.84009	-5.77685	1.67704	-3.44466	0.000571774	0.0103754	protein_coding	intronic	0	0	0	0	0	0	0	0	0	0	1	1	0	0
wt_saf_neg_peak_53719	chr15	3340946	3341023	-	78	5	2	10	3	0	0	0	0	Yes	0.134592	0.0592322	0.300501	0.0407149	0	0	0	0	N/A	Yes	0.164775	0	Yes	3.0548	-4.60846	1.97703	-2.331	0.0197532	0.134405	protein_coding	exonic	0	0	0	0	0	0	0	0	0	0	0	0	0	0
wt_saf_neg_peak_53737	chr15	3471545	3471899	-	355	7	4	14	0	0	0	0	0	Yes	0.188428	0.118465	0.420701	0	0	0	0	0	N/A	Yes	0.242531	0	Yes	4.48759	-5.16358	1.8234	-2.83184	0.00462815	0.0506111	protein_coding	UTR5	0	0	0	0	0	0	0	0	0	0	0	1	0	0
wt_saf_neg_peak_53740	chr15	3488741	3489349	-	609	20	9	21	14	0	1	0	3	Yes	0.538367	0.266545	0.631051	0.190003	0	0.031047	0	0.198327	N/A	Yes	0.478654	0.0155235	Yes	9.07401	-4.69918	1.62567	-2.89062	0.00384484	0.0443428	protein_coding	intronic	0	0	0	0	0	0	0	0	0	0	0	0	0	0
wt_saf_neg_peak_53741	chr15	3490115	3490322	-	208	6	7	5	0	0	0	0	0	Yes	0.16151	0.207313	0.15025	0	0	0	0	0	N/A	Yes	0.173024	0	Yes	3.16459	-4.66431	1.91159	-2.44001	0.0146867	0.111238	protein_coding	intronic	0	0	0	0	0	0	0	0	0	0	0	0	0	0
wt_saf_neg_peak_53743	chr15	3494708	3495053	-	346	2	5	7	4	0	0	0	0	Yes	0.0538367	0.148081	0.21035	0.0542865	0	0	0	0	N/A	Yes	0.137423	0	Yes	2.5212	-4.33094	2.04593	-2.11686	0.0342719	NA	protein_coding	intronic	0	0	0	1	0	0	0	0	0	0	0	0	0	0
wt_saf_neg_peak_53752	chr15	3510515	3510589	-	75	8	1	5	0	0	0	0	0	Yes	0.215347	0.0296161	0.15025	0	0	0	0	0	N/A	Yes	0.131738	0	Yes	2.44326	-4.29246	2.09349	-2.05039	0.0403266	NA	protein_coding	intronic	0	0	0	0	0	0	0	0	0	0	0	0	0	0
wt_saf_neg_peak_53759	chr15	3525375	3525561	-	187	11	5	5	0	0	0	0	4	Yes	0.296102	0.148081	0.15025	0	0	0	0	0.264436	N/A	Yes	0.198144	0	Yes	3.64573	-4.87133	1.87089	-2.60375	0.00922099	0.0817	protein_coding	intronic	0	1	0	0	0	0	0	0	0	0	0	0	0	0
wt_saf_neg_peak_53763	chr15	3540396	3541343	-	948	19	27	45	33	6	6	0	0	Yes	0.511448	0.799635	1.35225	0.447864	0.182129	0.186282	0	0	N/A	No	0.887779	0.184206	Yes	19.0429	-1.99907	0.70062	-2.85328	0.004327	0.0481949	protein_coding	intronic	0	0	0	3	0	0	0	0	0	0	2	1	0	0
wt_saf_neg_peak_53768	chr15	3547411	3547779	-	369	11	10	16	10	3	0	0	3	Yes	0.296102	0.296161	0.480801	0.135716	0.0910646	0	0	0.198327	N/A	Yes	0.357688	0.0455323	Yes	7.23968	-2.70735	1.19939	-2.25728	0.0239905	0.153232	protein_coding	intronic	0	0	0	0	0	0	0	0	0	0	0	0	0	0
wt_saf_neg_peak_53776	chr15	3567419	3567504	-	86	7	5	14	0	0	0	0	0	Yes	0.188428	0.148081	0.420701	0	0	0	0	0	N/A	Yes	0.252403	0	Yes	4.66332	-5.2191	1.8032	-2.89436	0.0037993	0.0439414	protein_coding	intronic	0	0	0	0	0	0	0	0	0	0	0	0	0	0
wt_saf_neg_peak_53778	chr15	3570281	3570645	-	365	10	8	29	11	1	5	1	2	Yes	0.269183	0.236929	0.871452	0.149288	0.0303548	0.155235	0.0696843	0.132218	N/A	No	0.459188	0.092795	Yes	9.88284	-2.0395	1.01002	-2.01927	0.0434589	0.226856	protein_coding	intronic	0	0	0	2	0	0	0	0	0	0	0	0	0	0
wt_saf_neg_peak_53969	chr15	8037491	8037565	-	75	11	6	5	0	0	0	0	1	Yes	0.296102	0.177697	0.15025	0	0	0	0	0.0661091	N/A	Yes	0.208016	0	Yes	3.82146	-4.93916	1.85045	-2.66917	0.00760385	0.0716398	protein_coding	intronic	0	0	0	0	0	0	0	0	0	0	0	0	0	0
wt_saf_neg_peak_53989	chr15	8075937	8076114	-	178	31	12	15	43	5	3	0	4	Yes	0.834468	0.355393	0.450751	0.58358	0.151774	0.0931411	0	0.264436	N/A	No	0.546871	0.122458	Yes	11.8733	-1.9012	0.849755	-2.23735	0.0252634	0.158712	protein_coding	intronic	0	0	0	1	0	0	0	0	0	0	0	0	0	0
wt_saf_neg_peak_54131	chr15	8698592	8698743	-	152	25	17	17	29	4	6	0	0	Yes	0.672958	0.503474	0.510851	0.393577	0.121419	0.186282	0	0	N/A	No	0.562428	0.153851	Yes	12.6083	-1.60308	0.773974	-2.07123	0.0383378	0.209256	protein_coding	intronic	0	0	0	0	0	0	0	0	0	0	0	0	0	0
wt_saf_neg_peak_54144	chr15	9094105	9094224	-	120	9	1	5	0	0	0	0	0	Yes	0.242265	0.0296161	0.15025	0	0	0	0	0	N/A	Yes	0.14071	0	Yes	2.60978	-4.3882	2.0674	-2.12257	0.0337901	NA	other	intronic	0	0	0	1	0	0	0	0	0	0	0	0	0	0
wt_saf_neg_peak_54165	chr15	9433094	9433237	-	144	6	4	8	3	0	0	0	1	Yes	0.16151	0.118465	0.2404	0.0407149	0	0	0	0.0661091	N/A	Yes	0.173458	0	Yes	3.19863	-4.67712	1.9176	-2.43905	0.0147258	0.11144	other	intronic	0	0	0	0	0	0	0	0	0	0	1	0	0	0
wt_saf_neg_peak_54302	chr15	11885420	11885546	-	127	2	6	5	2	0	0	0	2	Yes	0.0538367	0.177697	0.15025	0.0271433	0	0	0	0.132218	N/A	Yes	0.127261	0	Yes	2.32278	-4.21446	2.0794	-2.02677	0.0426857	NA	protein_coding	intronic	0	0	0	0	0	0	0	0	0	0	1	0	0	0
wt_saf_neg_peak_54330	chr15	12357708	12358230	-	523	10	10	5	2	0	1	0	1	Yes	0.269183	0.296161	0.15025	0.0271433	0	0.031047	0	0.0661091	N/A	Yes	0.238532	0.0155235	Yes	4.59136	-3.67996	1.76504	-2.08492	0.0370767	0.204783	other	intronic	0	1	0	0	0	0	0	0	0	0	0	1	0	0
wt_saf_neg_peak_54337	chr15	12381194	12381468	-	275	11	1	5	4	0	0	0	2	Yes	0.296102	0.0296161	0.15025	0.0542865	0	0	0	0.132218	N/A	Yes	0.158656	0	Yes	2.94282	-4.56243	2.02452	-2.25359	0.0242222	0.154228	protein_coding	intronic	0	0	0	0	0	0	0	0	0	0	0	0	0	0
wt_saf_neg_peak_54351	chr15	12409722	12410081	-	360	5	9	5	0	0	0	0	0	Yes	0.134592	0.266545	0.15025	0	0	0	0	0	N/A	Yes	0.183796	0	Yes	3.34953	-4.74566	1.8979	-2.50048	0.0124025	0.0995559	protein_coding	intronic	0	0	0	1	0	0	0	0	0	0	0	0	0	0
wt_saf_neg_peak_54379	chr15	12481324	12481748	-	425	11	6	6	0	0	1	0	0	Yes	0.296102	0.177697	0.1803	0	0	0.031047	0	0	N/A	Yes	0.218033	0.0155235	Yes	4.24204	-3.55902	1.78721	-1.99138	0.046439	0.23637	protein_coding	intronic	1	0	0	0	0	0	0	0	0	0	0	0	0	0
wt_saf_neg_peak_54420	chr15	12614140	12614511	-	372	3	7	7	0	0	0	0	1	Yes	0.080755	0.207313	0.21035	0	0	0	0	0.0661091	N/A	Yes	0.166139	0	Yes	3.03918	-4.60213	1.94772	-2.36283	0.0181358	0.127384	other	intronic	1	0	0	0	0	0	0	0	0	0	0	0	0	0
wt_saf_neg_peak_54424	chr15	12629012	12629705	-	694	17	7	5	5	2	0	0	0	Yes	0.457612	0.207313	0.15025	0.0678582	0.0607097	0	0	0	N/A	Yes	0.271725	0.0303548	Yes	5.43463	-2.90142	1.43581	-2.02076	0.0433045	0.22636	other	intronic	0	0	0	0	0	0	0	0	0	0	0	1	0	0
wt_saf_neg_peak_54452	chr15	12716098	12716817	-	720	21	15	12	7	0	0	0	3	Yes	0.565285	0.444242	0.360601	0.0950014	0	0	0	0.198327	N/A	Yes	0.456709	0	Yes	8.37774	-6.0705	1.64116	-3.6989	0.000216537	0.00470795	other	intronic	0	0	0	0	0	0	0	0	0	0	1	1	0	0
wt_saf_neg_peak_54614	chr15	25771007	25771551	-	545	27	20	14	0	8	1	0	0	Yes	0.726795	0.592322	0.420701	0	0.242839	0.031047	0	0	N/A	Yes	0.579939	0.136943	Yes	12.6164	-1.82055	0.835974	-2.17776	0.0294241	0.175907	other	intronic	0	0	0	0	0	0	0	0	0	0	1	3	0	0
wt_saf_neg_peak_54631	chr15	25901458	25901643	-	186	31	26	14	0	4	4	0	0	Yes	0.834468	0.770019	0.420701	0	0.121419	0.124188	0	0	N/A	Yes	0.675063	0.122804	Yes	14.1607	-2.18895	0.793345	-2.75914	0.00579542	0.059332	other	intronic	0	0	0	1	0	0	0	0	0	0	0	0	0	0
wt_saf_neg_peak_54640	chr15	26605407	26606080	-	674	8	12	10	0	2	0	0	0	Yes	0.215347	0.355393	0.300501	0	0.0607097	0	0	0	N/A	Yes	0.290414	0.0303548	Yes	5.74997	-2.98172	1.38747	-2.14904	0.0316315	0.184397	protein_coding	intronic	0	0	0	1	0	0	0	0	0	0	1	1	0	0
wt_saf_neg_peak_54645	chr15	26631864	26632346	-	483	17	18	11	14	0	2	0	2	Yes	0.457612	0.53309	0.330551	0.190003	0	0.0620941	0	0.132218	N/A	Yes	0.440418	0.031047	Yes	8.51877	-3.55927	1.27838	-2.78419	0.00536616	0.0561457	protein_coding	intronic	0	0	1	0	0	0	0	0	0	0	0	1	0	0
wt_saf_neg_peak_54657	chr15	26686127	26686575	-	449	14	13	17	4	3	3	0	1	Yes	0.376857	0.38501	0.510851	0.0542865	0.0910646	0.0931411	0	0.0661091	N/A	Yes	0.424239	0.0921028	Yes	9.15399	-1.93522	0.932161	-2.07606	0.0378884	0.207672	protein_coding	intronic	0	0	0	0	0	0	0	0	0	0	0	0	0	0
wt_saf_neg_peak_54665	chr15	26706721	26706905	-	185	9	15	5	13	2	0	0	0	Yes	0.242265	0.444242	0.15025	0.176431	0.0607097	0	0	0	N/A	No	0.278919	0.0303548	Yes	5.50831	-2.91886	1.42256	-2.05183	0.040186	0.215735	protein_coding	intronic	0	0	0	0	0	0	0	0	0	0	0	0	0	0
wt_saf_neg_peak_54667	chr15	26711921	26712070	-	150	2	6	8	0	0	0	0	0	Yes	0.0538367	0.177697	0.2404	0	0	0	0	0	N/A	Yes	0.157311	0	Yes	2.88401	-4.52482	1.99074	-2.27293	0.0230301	NA	protein_coding	intronic	0	0	0	0	0	0	0	0	0	0	0	0	0	0
wt_saf_neg_peak_54691	chr15	26758771	26759061	-	291	25	13	12	6	0	0	0	4	Yes	0.672958	0.38501	0.360601	0.0814298	0	0	0	0.264436	N/A	Yes	0.472856	0	Yes	8.69236	-6.12448	1.64217	-3.7295	0.000191862	0.0042639	protein_coding	intronic	0	1	0	0	0	0	0	0	0	0	0	0	0	0
wt_saf_neg_peak_54699	chr15	26773603	26773704	-	102	10	13	7	0	1	0	0	0	Yes	0.269183	0.38501	0.21035	0	0.0303548	0	0	0	N/A	Yes	0.288181	0.0151774	Yes	5.47836	-3.95943	1.71704	-2.30597	0.0211125	0.140489	protein_coding	intronic	0	0	0	0	0	0	0	0	0	0	0	0	0	0
wt_saf_neg_peak_54700	chr15	26777102	26777629	-	528	23	10	14	12	0	2	0	3	Yes	0.619122	0.296161	0.420701	0.16286	0	0.0620941	0	0.198327	N/A	Yes	0.445328	0.031047	Yes	8.67328	-3.58678	1.28599	-2.78912	0.00528522	0.0555686	protein_coding	intronic	0	0	0	0	0	0	0	0	0	0	0	0	0	0
wt_saf_neg_peak_54734	chr15	26886795	26887342	-	548	27	7	26	10	4	2	0	2	Yes	0.726795	0.207313	0.781302	0.135716	0.121419	0.0620941	0	0.132218	N/A	Yes	0.571803	0.0917567	Yes	11.9337	-2.38527	0.933248	-2.55588	0.0105921	0.0897125	protein_coding	intronic	0	0	0	0	0	0	0	0	0	0	0	1	0	0
wt_saf_neg_peak_54835	chr15	27859958	27860248	-	291	16	9	9	18	0	2	0	0	Yes	0.430693	0.266545	0.270451	0.244289	0	0.0620941	0	0	N/A	No	0.322563	0.031047	Yes	6.39654	-3.11604	1.35473	-2.30012	0.0214414	0.141834	protein_coding	intronic	0	0	0	0	0	0	0	0	0	0	0	0	0	0
wt_saf_neg_peak_54837	chr15	27862348	27862464	-	117	6	6	5	9	0	0	0	0	Yes	0.16151	0.177697	0.15025	0.122145	0	0	0	0	N/A	No	0.163152	0	Yes	2.98886	-4.58186	1.93386	-2.36928	0.0178227	0.126016	protein_coding	intronic	0	0	0	0	0	0	0	0	0	0	0	0	0	0
wt_saf_neg_peak_54925	chr15	30250449	30250610	-	162	18	17	16	0	1	6	0	0	Yes	0.48453	0.503474	0.480801	0	0.0303548	0.186282	0	0	N/A	Yes	0.489602	0.108318	Yes	10.5981	-1.90253	0.893695	-2.12884	0.0332677	0.190708	other	intronic	0	0	1	0	0	0	0	0	0	0	0	1	0	0
wt_saf_neg_peak_55022	chr15	33929622	33929864	-	243	5	9	3	0	0	0	0	2	Yes	0.134592	0.266545	0.0901502	0	0	0	0	0.132218	N/A	Yes	0.163762	0	Yes	2.97538	-4.57648	1.95903	-2.33609	0.0194865	0.133251	other	intronic	0	1	0	0	0	0	0	0	0	0	0	0	0	0
wt_saf_neg_peak_55105	chr15	34864906	34865620	-	715	12	11	8	0	0	0	0	1	Yes	0.32302	0.325777	0.2404	0	0	0	0	0.0661091	N/A	Yes	0.296399	0	Yes	5.42785	-5.44363	1.73349	-3.14028	0.00168789	0.0239493	other	intronic	0	0	0	2	0	0	0	0	0	0	0	0	0	0
wt_saf_neg_peak_55107	chr15	34867754	34867855	-	102	6	7	3	0	0	0	0	2	Yes	0.16151	0.207313	0.0901502	0	0	0	0	0.132218	N/A	Yes	0.152991	0	Yes	2.79044	-4.48471	1.97648	-2.26904	0.0232661	NA	other	intronic	0	0	0	1	0	0	0	0	0	0	0	0	0	0
wt_saf_neg_peak_55226	chr15	35857990	35858187	-	198	16	17	11	0	0	2	0	3	Yes	0.430693	0.503474	0.330551	0	0	0.0620941	0	0.198327	N/A	Yes	0.421573	0.031047	Yes	8.17652	-3.49607	1.2863	-2.71792	0.00656941	0.064695	other	intronic	0	0	1	0	0	0	0	0	0	0	1	0	0	0
wt_saf_neg_peak_55273	chr15	36234242	36234500	-	259	19	9	14	7	1	3	0	4	Yes	0.511448	0.266545	0.420701	0.0950014	0.0303548	0.0931411	0	0.264436	N/A	Yes	0.399565	0.061748	Yes	8.28413	-2.43188	1.06552	-2.28235	0.0224685	0.146447	other	intronic	0	0	0	0	0	0	0	0	0	0	0	0	0	0
wt_saf_neg_peak_55376	chr15	37232589	37232794	-	206	14	14	6	6	0	1	0	2	Yes	0.376857	0.414626	0.1803	0.0814298	0	0.031047	0	0.132218	N/A	Yes	0.323928	0.0155235	Yes	6.14743	-4.12203	1.69622	-2.43013	0.0150935	0.113267	lncRNA	exonic	0	0	0	0	0	0	0	0	0	0	0	0	0	0
wt_saf_neg_peak_55384	chr15	37552571	37552865	-	295	5	9	4	3	0	0	0	3	Yes	0.134592	0.266545	0.1202	0.0407149	0	0	0	0.198327	N/A	Yes	0.173779	0	Yes	3.16246	-4.66356	1.9251	-2.4225	0.015414	0.114712	protein_coding	intronic	0	0	0	2	0	0	0	0	0	0	1	0	0	0
wt_saf_neg_peak_55492	chr15	38083241	38083518	-	278	15	11	11	3	1	0	0	4	Yes	0.403775	0.325777	0.330551	0.0407149	0.0303548	0	0	0.264436	N/A	Yes	0.353368	0.0151774	Yes	6.70779	-4.26175	1.66591	-2.55822	0.010521	0.0893014	other	intronic	0	1	0	0	0	0	0	0	0	0	1	1	0	0
wt_saf_neg_peak_55495	chr15	38289296	38289742	-	447	7	9	7	2	1	0	0	2	Yes	0.188428	0.266545	0.21035	0.0271433	0.0303548	0	0	0.132218	N/A	Yes	0.221775	0.0151774	Yes	4.27588	-3.58396	1.7801	-2.01335	0.0440777	0.228818	other	intronic	0	0	0	0	0	0	0	0	0	0	0	0	0	0
wt_saf_neg_peak_55563	chr15	39206117	39206726	-	610	16	18	8	14	1	1	0	3	Yes	0.430693	0.53309	0.2404	0.190003	0.0303548	0.031047	0	0.198327	N/A	Yes	0.401395	0.030701	Yes	7.77669	-3.43471	1.29827	-2.64561	0.00815437	0.075203	other	intronic	0	1	0	0	0	0	0	0	0	0	0	0	0	0
wt_saf_neg_peak_55588	chr15	39882166	39882306	-	141	13	8	8	5	1	0	0	3	Yes	0.349938	0.236929	0.2404	0.0678582	0.0303548	0	0	0.198327	N/A	Yes	0.275756	0.0151774	Yes	5.28634	-3.90659	1.72422	-2.26571	0.0234692	0.150917	protein_coding	intronic	0	0	0	0	0	0	0	0	0	0	0	0	0	0
wt_saf_neg_peak_55613	chr15	39989457	39989610	-	154	5	6	3	4	0	0	0	1	Yes	0.134592	0.177697	0.0901502	0.0542865	0	0	0	0.0661091	N/A	Yes	0.134146	0	Yes	2.4482	-4.29531	2.0334	-2.11237	0.0346543	NA	other	intronic	0	1	0	0	0	0	0	0	0	0	0	0	0	0
wt_saf_neg_peak_55618	chr15	41046953	41047489	-	537	42	26	16	15	3	5	0	0	Yes	1.13057	0.770019	0.480801	0.203574	0.0910646	0.155235	0	0	N/A	Yes	0.793797	0.12315	Yes	16.3809	-2.42178	0.778648	-3.11024	0.00186936	0.0259096	other	intronic	0	0	0	0	0	0	0	0	0	0	3	0	0	0
wt_saf_neg_peak_55663	chr15	43406460	43406573	-	114	5	5	3	0	0	0	0	1	Yes	0.134592	0.148081	0.0901502	0	0	0	0	0.0661091	N/A	Yes	0.124274	0	Yes	2.27247	-4.18793	2.06773	-2.02537	0.0428294	NA	other	intronic	0	1	0	0	0	0	0	0	0	0	0	0	0	0
wt_saf_neg_peak_55726	chr15	47447061	47447144	-	84	6	5	4	3	0	0	0	0	Yes	0.16151	0.148081	0.1202	0.0407149	0	0	0	0	N/A	Yes	0.143264	0	Yes	2.62606	-4.39617	1.99322	-2.20557	0.0274143	NA	other	intronic	0	0	0	0	0	0	0	0	0	0	1	0	0	0
wt_saf_neg_peak_55727	chr15	47992613	47992701	-	89	22	8	15	1	4	0	0	1	Yes	0.592203	0.236929	0.450751	0.0135716	0.121419	0	0	0.0661091	N/A	Yes	0.426628	0.0607097	Yes	8.75202	-2.55716	1.09684	-2.33139	0.0197328	0.134329	protein_coding	intronic	0	0	0	0	0	0	0	0	0	0	1	0	0	0
wt_saf_neg_peak_55979	chr15	53163044	53163163	-	120	17	24	22	5	3	7	0	0	Yes	0.457612	0.710787	0.661101	0.0678582	0.0910646	0.217329	0	0	N/A	Yes	0.609833	0.154197	Yes	13.4559	-1.70711	0.770532	-2.21549	0.0267264	0.164844	protein_coding	intronic	0	0	0	0	0	0	0	0	0	0	0	0	0	0
wt_saf_neg_peak_56114	chr15	53519060	53519887	-	828	24	32	17	9	5	8	0	3	Yes	0.64604	0.947716	0.510851	0.122145	0.151774	0.248376	0	0.198327	N/A	Yes	0.701536	0.200075	Yes	15.7639	-1.53239	0.702674	-2.1808	0.029198	0.174987	protein_coding	intronic	0	0	0	0	0	0	0	0	0	0	0	1	0	0
wt_saf_neg_peak_56123	chr15	53538197	53538663	-	467	7	6	9	6	0	0	0	0	Yes	0.188428	0.177697	0.270451	0.0814298	0	0	0	0	N/A	Yes	0.212192	0	Yes	3.90368	-4.96486	1.83646	-2.7035	0.00686141	0.0666671	protein_coding	intronic	0	0	0	0	0	0	0	0	0	0	0	0	0	0
wt_saf_neg_peak_56130	chr15	53565116	53565709	-	594	30	25	17	25	10	1	0	3	Yes	0.80755	0.740403	0.510851	0.339291	0.303548	0.031047	0	0.198327	N/A	Yes	0.686268	0.167298	Yes	14.9942	-1.77411	0.779186	-2.27688	0.0227935	0.147953	protein_coding	intronic	0	0	0	0	0	0	0	0	0	0	0	0	0	0
wt_saf_neg_peak_56136	chr15	53588528	53588728	-	201	6	20	7	2	0	1	0	0	Yes	0.16151	0.592322	0.21035	0.0271433	0	0.031047	0	0	N/A	Yes	0.321394	0.0155235	Yes	6.05672	-4.09588	1.7242	-2.37552	0.0175241	0.12487	protein_coding	intronic	0	1	0	0	0	0	0	0	0	0	0	0	0	0
wt_saf_neg_peak_56164	chr15	53650400	53650727	-	328	9	2	6	1	0	0	0	0	Yes	0.242265	0.0592322	0.1803	0.0135716	0	0	0	0	N/A	Yes	0.160599	0	Yes	2.97258	-4.57502	1.97567	-2.31568	0.0205757	0.13804	protein_coding	intronic	0	0	0	0	0	0	0	0	0	0	0	0	0	0
wt_saf_neg_peak_56214	chr15	53800395	53800586	-	192	11	11	2	0	0	0	0	1	Yes	0.296102	0.325777	0.0601001	0	0	0	0	0.0661091	N/A	Yes	0.227326	0	Yes	4.13889	-5.05562	1.86385	-2.71245	0.00667873	0.065498	protein_coding	intronic	0	0	0	0	0	0	0	0	0	0	0	1	0	0
wt_saf_neg_peak_56233	chr15	53847536	53847974	-	439	23	13	14	1	0	1	0	4	Yes	0.619122	0.38501	0.420701	0.0135716	0	0.031047	0	0.264436	N/A	Yes	0.474944	0.0155235	Yes	8.96697	-4.68472	1.61627	-2.89847	0.00374983	0.0435447	protein_coding	intronic	0	0	0	0	0	0	0	0	0	0	0	0	0	0
wt_saf_neg_peak_56254	chr15	53981619	53982167	-	549	7	10	9	0	1	0	0	4	Yes	0.188428	0.296161	0.270451	0	0.0303548	0	0	0.264436	N/A	Yes	0.25168	0.0151774	Yes	4.82576	-3.76587	1.74741	-2.15511	0.0311529	0.182722	other	intronic	0	1	0	0	0	0	0	0	0	0	0	0	0	0
wt_saf_neg_peak_56266	chr15	54854095	54854373	-	279	8	7	4	1	0	0	0	0	Yes	0.215347	0.207313	0.1202	0.0135716	0	0	0	0	N/A	Yes	0.180953	0	Yes	3.31056	-4.73148	1.89961	-2.49077	0.0127467	0.101315	protein_coding	intronic	0	0	0	0	0	0	0	0	0	0	0	1	0	0
wt_saf_neg_peak_56268	chr15	54858558	54858711	-	154	6	7	5	7	0	0	0	0	Yes	0.16151	0.207313	0.15025	0.0950014	0	0	0	0	N/A	No	0.173024	0	Yes	3.16459	-4.66431	1.91159	-2.44001	0.0146867	0.111238	protein_coding	intronic	0	0	0	0	0	0	0	0	0	0	0	0	0	0
wt_saf_neg_peak_56271	chr15	54862486	54864020	-	1535	15	20	23	18	2	3	0	2	Yes	0.403775	0.592322	0.691152	0.244289	0.0607097	0.0931411	0	0.132218	N/A	Yes	0.562416	0.0769254	Yes	11.4539	-2.59819	0.923854	-2.81234	0.00491826	0.0528278	protein_coding	intronic	0	0	0	0	0	0	0	0	0	0	0	0	0	0
wt_saf_neg_peak_56283	chr15	54901896	54902392	-	497	13	6	2	7	0	0	0	0	Yes	0.349938	0.177697	0.0601001	0.0950014	0	0	0	0	N/A	No	0.195912	0	Yes	3.59328	-4.85328	1.91644	-2.53245	0.0113268	0.093963	protein_coding	intronic	0	0	0	1	0	0	0	0	0	0	0	1	0	0
wt_saf_neg_peak_56340	chr15	55509616	55509953	-	338	6	7	1	3	0	0	0	1	Yes	0.16151	0.207313	0.0300501	0.0407149	0	0	0	0.0661091	N/A	Yes	0.132958	0	Yes	2.4163	-4.27917	2.09252	-2.04498	0.0408565	NA	other	intronic	0	0	0	0	0	0	0	0	0	0	0	0	0	0
wt_saf_neg_peak_56397	chr15	55881752	55881996	-	245	6	7	2	0	0	0	0	0	Yes	0.16151	0.207313	0.0601001	0	0	0	0	0	N/A	Yes	0.142974	0	Yes	2.60337	-4.38568	2.02374	-2.16711	0.0302263	NA	protein_coding	intronic	0	0	0	0	0	0	0	0	0	0	0	1	0	0
wt_saf_neg_peak_56408	chr15	56669836	56669962	-	127	5	5	9	10	0	0	0	0	Yes	0.134592	0.148081	0.270451	0.135716	0	0	0	0	N/A	No	0.184374	0	Yes	3.39491	-4.76181	1.89603	-2.51146	0.0120234	0.0977059	protein_coding	exonic	0	0	0	0	0	0	0	0	0	0	0	0	0	0
wt_saf_neg_peak_56494	chr15	58177788	58177935	-	148	8	5	5	8	0	0	0	0	Yes	0.215347	0.148081	0.15025	0.108573	0	0	0	0	N/A	No	0.171226	0	Yes	3.14617	-4.65721	1.9168	-2.42968	0.0151123	0.11332	protein_coding	UTR3	0	0	0	0	0	0	0	0	0	0	0	0	0	0
wt_saf_neg_peak_56508	chr15	58772602	58772702	-	101	6	2	6	0	0	0	0	1	Yes	0.16151	0.0592322	0.1803	0	0	0	0	0.0661091	N/A	Yes	0.133681	0	Yes	2.47302	-4.3073	2.04837	-2.1028	0.0354833	NA	other	intronic	0	0	0	1	0	0	0	0	0	0	0	0	0	0
wt_saf_neg_peak_56653	chr15	59314322	59314678	-	357	11	13	14	4	1	1	0	4	Yes	0.296102	0.38501	0.420701	0.0542865	0.0303548	0.031047	0	0.264436	N/A	Yes	0.367271	0.030701	Yes	7.18789	-3.30954	1.305	-2.53605	0.0112111	0.0932476	other	intronic	0	0	0	0	0	0	0	0	0	0	0	3	0	0
wt_saf_neg_peak_56655	chr15	59323205	59323514	-	310	4	7	7	1	0	0	0	4	Yes	0.107673	0.207313	0.21035	0.0135716	0	0	0	0.264436	N/A	Yes	0.175112	0	Yes	3.2057	-4.67989	1.91544	-2.44325	0.0145558	0.110657	other	intronic	0	0	0	0	0	0	0	0	0	0	0	0	0	0
wt_saf_neg_peak_56686	chr15	59452461	59452623	-	163	7	8	2	0	0	0	0	2	Yes	0.188428	0.236929	0.0601001	0	0	0	0	0.132218	N/A	Yes	0.161819	0	Yes	2.94562	-4.56418	1.9744	-2.31168	0.0207956	0.139052	other	intronic	0	0	0	1	0	0	0	0	0	0	0	0	0	0
wt_saf_neg_peak_56691	chr15	59488443	59488808	-	366	12	6	10	3	1	1	0	1	Yes	0.32302	0.177697	0.300501	0.0407149	0.0303548	0.031047	0	0.0661091	N/A	Yes	0.267072	0.030701	Yes	5.37601	-2.85939	1.38961	-2.05768	0.0396204	0.213818	other	intronic	0	1	0	0	0	0	0	0	0	0	0	0	0	0
wt_saf_neg_peak_56730	chr15	62203371	62203471	-	101	8	5	3	2	0	0	0	1	Yes	0.215347	0.148081	0.0901502	0.0271433	0	0	0	0.0661091	N/A	Yes	0.151193	0	Yes	2.77203	-4.47662	1.98214	-2.25848	0.0239155	NA	other	intronic	0	0	0	0	0	0	0	0	0	0	0	0	0	0
wt_saf_neg_peak_56854	chr15	64181107	64181181	-	75	7	6	1	6	0	0	0	0	Yes	0.188428	0.177697	0.0300501	0.0814298	0	0	0	0	N/A	Yes	0.132058	0	Yes	2.40709	-4.27447	2.09359	-2.04169	0.0411823	NA	protein_coding	intronic	0	0	0	0	0	0	0	0	0	0	0	0	0	0
wt_saf_neg_peak_56876	chr15	64229437	64229752	-	316	4	10	11	12	0	1	0	1	Yes	0.107673	0.296161	0.330551	0.16286	0	0.031047	0	0.0661091	N/A	No	0.244795	0.0155235	Yes	4.71468	-3.71318	1.77403	-2.09308	0.0363421	0.202169	protein_coding	intronic	0	0	0	0	0	0	0	0	0	0	0	0	0	0
wt_saf_neg_peak_56878	chr15	64233056	64233371	-	316	12	11	14	0	1	0	0	0	Yes	0.32302	0.325777	0.420701	0	0.0303548	0	0	0	N/A	Yes	0.356499	0.0151774	Yes	6.76946	-4.273	1.66486	-2.56658	0.0102707	0.0878557	protein_coding	intronic	0	0	0	0	0	0	0	0	0	0	0	0	0	0
wt_saf_neg_peak_56952	chr15	65987355	65987580	-	226	9	1	6	3	0	0	0	0	Yes	0.242265	0.0296161	0.1803	0.0407149	0	0	0	0	N/A	Yes	0.150727	0	Yes	2.79685	-4.48706	2.03649	-2.20333	0.0275717	NA	protein_coding	UTR3	0	0	0	0	0	0	0	0	0	0	0	0	0	0
wt_saf_neg_peak_56954	chr15	65993768	65994144	-	377	11	8	4	7	0	0	0	4	Yes	0.296102	0.236929	0.1202	0.0950014	0	0	0	0.264436	N/A	Yes	0.217744	0	Yes	3.98585	-5.00048	1.84071	-2.7166	0.00659563	0.0648717	protein_coding	UTR3	0	0	0	0	0	0	0	0	0	0	0	0	0	0
wt_saf_neg_peak_56961	chr15	66083054	66083369	-	316	15	14	10	4	0	0	0	0	Yes	0.403775	0.414626	0.300501	0.0542865	0	0	0	0	N/A	Yes	0.372967	0	Yes	6.82874	-5.77486	1.67892	-3.43962	0.000582532	0.0105307	protein_coding	intronic	0	1	0	0	0	0	0	0	0	0	0	0	0	0
wt_saf_neg_peak_56973	chr15	66129880	66130314	-	435	19	20	14	2	0	2	0	4	Yes	0.511448	0.592322	0.420701	0.0271433	0	0.0620941	0	0.264436	N/A	Yes	0.508157	0.031047	Yes	9.76449	-3.76746	1.24656	-3.02228	0.00250879	0.0323002	protein_coding	intronic	0	0	0	1	0	0	0	0	0	0	1	0	0	0
wt_saf_neg_peak_56977	chr15	66142055	66142555	-	501	9	29	4	1	1	1	0	1	Yes	0.242265	0.858867	0.1202	0.0135716	0.0303548	0.031047	0	0.0661091	N/A	Yes	0.407111	0.030701	Yes	7.79578	-3.43748	1.37189	-2.50565	0.0122227	0.0987578	protein_coding	intronic	0	0	0	1	0	0	0	0	0	0	0	0	0	0
wt_saf_neg_peak_56979	chr15	66149394	66149860	-	467	26	8	12	6	2	3	0	4	Yes	0.699877	0.236929	0.360601	0.0814298	0.0607097	0.0931411	0	0.264436	N/A	Yes	0.432469	0.0769254	Yes	9.11906	-2.2333	1.00915	-2.21304	0.026895	0.165543	protein_coding	intronic	0	0	0	0	0	0	0	0	0	0	0	0	0	0
wt_saf_neg_peak_56981	chr15	66153016	66153351	-	336	24	12	16	0	0	0	0	3	Yes	0.64604	0.355393	0.480801	0	0	0	0	0.198327	N/A	Yes	0.494078	0	Yes	9.09841	-6.18888	1.63149	-3.79339	0.000148606	0.00345105	protein_coding	intronic	0	0	0	0	0	0	0	0	0	0	1	0	0	0
wt_saf_neg_peak_56984	chr15	66160445	66160548	-	104	10	8	8	5	0	0	0	0	Yes	0.269183	0.236929	0.2404	0.0678582	0	0	0	0	N/A	Yes	0.248838	0	Yes	4.56762	-5.19386	1.78074	-2.9167	0.0035376	0.0417919	protein_coding	intronic	0	0	0	0	0	0	0	0	0	0	0	0	0	0
wt_saf_neg_peak_56985	chr15	66163432	66164427	-	996	45	34	19	7	3	3	0	4	Yes	1.21132	1.00695	0.570951	0.0950014	0.0910646	0.0931411	0	0.264436	N/A	Yes	0.929741	0.0921028	Yes	18.3806	-3.06707	0.80573	-3.80657	0.000140905	0.00330218	protein_coding	intronic	0	0	0	2	0	0	0	0	0	0	1	0	0	0
wt_saf_neg_peak_56988	chr15	66172428	66172983	-	556	15	17	10	13	2	0	0	0	Yes	0.403775	0.503474	0.300501	0.176431	0.0607097	0	0	0	N/A	Yes	0.402583	0.0303548	Yes	7.79425	-3.4516	1.30451	-2.6459	0.0081475	0.075158	protein_coding	intronic	0	0	0	0	0	0	0	0	0	0	0	0	0	0
wt_saf_neg_peak_56991	chr15	66176985	66177059	-	75	5	7	10	2	0	0	0	0	Yes	0.134592	0.207313	0.300501	0.0271433	0	0	0	0	N/A	Yes	0.214135	0	Yes	3.93344	-4.97413	1.84249	-2.69968	0.0069407	0.0671995	protein_coding	intronic	1	0	0	0	0	0	0	0	0	0	0	0	0	0
wt_saf_neg_peak_56993	chr15	66179838	66179912	-	75	6	12	2	5	0	0	0	0	Yes	0.16151	0.355393	0.0601001	0.0678582	0	0	0	0	N/A	Yes	0.192334	0	Yes	3.48202	-4.8044	1.92696	-2.49325	0.0126579	0.100929	protein_coding	intronic	0	0	0	0	0	0	0	0	0	0	0	0	0	0
wt_saf_neg_peak_56996	chr15	66191494	66192389	-	896	40	17	36	66	10	2	0	1	Yes	1.07673	0.503474	1.0818	0.895728	0.303548	0.0620941	0	0.0661091	N/A	No	0.887337	0.182821	Yes	19.0415	-2.02429	0.723721	-2.79706	0.00515692	0.0546048	protein_coding	intronic	0	0	0	1	0	0	0	0	0	0	0	0	0	0
wt_saf_neg_peak_56998	chr15	66196528	66197285	-	758	50	25	28	37	6	7	0	2	Yes	1.34592	0.740403	0.841402	0.502151	0.182129	0.217329	0	0.132218	N/A	No	0.975907	0.199729	Yes	20.9067	-2.02604	0.651756	-3.10859	0.00187984	0.0260234	protein_coding	intronic	0	0	0	0	0	0	0	0	0	0	0	0	0	0
wt_saf_neg_peak_57010	chr15	66221872	66221991	-	120	13	9	2	1	1	0	0	4	Yes	0.349938	0.266545	0.0601001	0.0135716	0.0303548	0	0	0.264436	N/A	Yes	0.225528	0.0151774	Yes	4.33963	-3.61318	1.82458	-1.98027	0.0476727	0.240429	protein_coding	intronic	0	0	0	0	0	0	0	0	0	0	0	0	0	0
wt_saf_neg_peak_57011	chr15	66222542	66222915	-	374	16	15	11	9	2	0	0	2	Yes	0.430693	0.444242	0.330551	0.122145	0.0607097	0	0	0.132218	N/A	Yes	0.401829	0.0303548	Yes	7.79639	-3.45179	1.30061	-2.65398	0.00795484	0.0738877	protein_coding	intronic	0	0	0	0	0	0	0	0	0	0	0	0	0	0
wt_saf_neg_peak_57013	chr15	66228653	66229026	-	374	17	24	15	41	0	2	0	4	Yes	0.457612	0.710787	0.450751	0.556437	0	0.0620941	0	0.264436	N/A	No	0.539717	0.031047	Yes	10.3214	-3.8509	1.23994	-3.10572	0.00189817	0.0262063	protein_coding	intronic	0	1	0	0	0	0	0	0	0	0	0	0	0	0
wt_saf_neg_peak_57016	chr15	66236002	66237780	-	1779	48	66	47	87	13	29	0	3	Yes	1.29208	1.95466	1.41235	1.18073	0.394613	0.900364	0	0.198327	N/A	No	1.55303	0.647489	Yes	38.0041	-0.981944	0.470533	-2.08688	0.0368993	0.204195	protein_coding	intronic	0	0	0	1	0	0	0	0	0	0	0	0	0	0
wt_saf_neg_peak_57068	chr15	67162846	67163178	-	333	5	8	5	10	0	0	0	4	Yes	0.134592	0.236929	0.15025	0.135716	0	0	0	0.264436	N/A	No	0.173924	0	Yes	3.1738	-4.66785	1.91545	-2.43694	0.0148121	0.111813	protein_coding	UTR5	0	0	0	0	0	0	0	0	0	0	0	0	0	0
wt_saf_neg_peak_57082	chr15	67652433	67652764	-	332	7	4	6	5	0	0	0	4	Yes	0.188428	0.118465	0.1803	0.0678582	0	0	0	0.264436	N/A	Yes	0.162398	0	Yes	2.991	-4.58264	1.93963	-2.36264	0.0181455	0.127403	other	intronic	0	0	0	0	0	0	0	0	0	0	0	0	0	0
wt_saf_neg_peak_57086	chr15	67686868	67687358	-	491	3	8	10	0	0	0	0	1	Yes	0.080755	0.236929	0.300501	0	0	0	0	0.0661091	N/A	Yes	0.206062	0	Yes	3.77613	-4.9142	1.87688	-2.61828	0.00883734	0.0794545	other	intronic	1	0	0	1	0	0	0	0	0	0	0	0	0	0
wt_saf_neg_peak_57092	chr15	67732086	67732326	-	241	8	9	2	0	0	0	0	0	Yes	0.215347	0.266545	0.0601001	0	0	0	0	0	N/A	Yes	0.180664	0	Yes	3.28787	-4.72299	1.93483	-2.44104	0.0146451	0.111075	other	intronic	0	0	0	0	0	0	0	0	0	0	0	0	0	0
wt_saf_neg_peak_57116	chr15	67849298	67849386	-	89	7	7	5	0	0	0	0	2	Yes	0.188428	0.207313	0.15025	0	0	0	0	0.132218	N/A	Yes	0.181997	0	Yes	3.33111	-4.73895	1.8911	-2.50593	0.0122131	0.0987066	other	intronic	0	0	0	0	0	0	0	0	0	0	0	0	0	0
wt_saf_neg_peak_57344	chr15	72886394	72886916	-	523	36	18	17	21	5	6	0	4	Yes	0.96906	0.53309	0.510851	0.285004	0.151774	0.186282	0	0.264436	N/A	No	0.671	0.169028	Yes	14.8349	-1.72611	0.742447	-2.32489	0.020078	0.135781	protein_coding	intronic	0	1	0	0	0	0	0	0	0	0	0	0	0	0
wt_saf_neg_peak_57462	chr15	73239327	73239447	-	121	16	4	9	7	1	1	0	3	Yes	0.430693	0.118465	0.270451	0.0950014	0.0303548	0.031047	0	0.198327	N/A	Yes	0.273203	0.030701	Yes	5.50356	-2.89857	1.41045	-2.05507	0.0398726	0.214675	protein_coding	intronic	0	0	0	0	0	0	0	0	0	0	0	0	0	0
wt_saf_neg_peak_57588	chr15	73655589	73655971	-	383	32	27	21	1	0	5	0	4	Yes	0.861387	0.799635	0.631051	0.0135716	0	0.155235	0	0.264436	N/A	Yes	0.764024	0.0776176	Yes	15.1694	-3.03098	0.889555	-3.4073	0.000656093	0.0115661	other	intronic	0	0	0	1	0	0	0	0	0	0	0	2	0	0
wt_saf_neg_peak_57611	chr15	74269635	74269861	-	227	5	5	3	5	0	0	0	0	Yes	0.134592	0.148081	0.0901502	0.0678582	0	0	0	0	N/A	No	0.124274	0	Yes	2.27247	-4.18793	2.06773	-2.02537	0.0428294	NA	other	intronic	0	0	0	1	0	0	0	0	0	0	0	0	0	0
wt_saf_neg_peak_57659	chr15	74619446	74619736	-	291	10	7	3	0	0	0	0	2	Yes	0.269183	0.207313	0.0901502	0	0	0	0	0.132218	N/A	Yes	0.188882	0	Yes	3.45652	-4.7955	1.89893	-2.52537	0.0115575	0.0951511	protein_coding	intronic	0	1	0	0	0	0	0	0	0	0	0	0	0	0
wt_saf_neg_peak_57757	chr15	75904972	75905074	-	103	45	36	43	48	7	9	0	4	Yes	1.21132	1.06618	1.29215	0.651439	0.212484	0.279423	0	0.264436	N/A	No	1.18989	0.245954	Yes	25.4994	-2.00672	0.574493	-3.49302	0.000477584	0.00895644	protein_coding	intronic	0	0	0	0	0	0	0	0	0	0	0	0	0	0
wt_saf_neg_peak_57810	chr15	76149698	76149912	-	215	8	4	5	0	0	0	0	0	Yes	0.215347	0.118465	0.15025	0	0	0	0	0	N/A	Yes	0.161354	0	Yes	2.97045	-4.57433	1.94517	-2.35164	0.0186911	0.129725	other	intronic	0	0	0	1	0	0	0	0	0	0	0	1	0	0
wt_saf_neg_peak_57843	chr15	76290662	76291143	-	482	11	7	9	1	1	1	0	2	Yes	0.296102	0.207313	0.270451	0.0135716	0.0303548	0.031047	0	0.132218	N/A	Yes	0.257955	0.030701	Yes	5.19815	-2.80646	1.39267	-2.01517	0.0438867	0.22828	other	intronic	0	0	1	2	0	0	0	0	0	0	0	0	0	0
wt_saf_neg_peak_57994	chr15	76913445	76913608	-	164	16	20	4	14	0	0	0	4	Yes	0.430693	0.592322	0.1202	0.190003	0	0	0	0.264436	N/A	Yes	0.381072	0	Yes	6.92719	-5.79762	1.71905	-3.37257	0.00074469	0.0127819	protein_coding	intronic	0	0	0	0	0	0	0	0	0	0	0	1	0	0
wt_saf_neg_peak_58082	chr15	77219703	77219840	-	138	31	27	20	22	10	2	0	3	Yes	0.834468	0.799635	0.601001	0.298576	0.303548	0.0620941	0	0.198327	N/A	Yes	0.745035	0.182821	Yes	16.3069	-1.76253	0.725368	-2.42985	0.0151051	0.11332	protein_coding	intronic	1	0	0	0	0	0	0	0	0	0	0	0	0	0
wt_saf_neg_peak_58141	chr15	77323311	77323713	-	403	28	20	7	14	4	0	0	1	Yes	0.753713	0.592322	0.21035	0.190003	0.121419	0	0	0.0661091	N/A	Yes	0.518795	0.0607097	Yes	10.3633	-2.82792	1.07216	-2.63758	0.00834997	0.0764204	other	intronic	0	0	0	0	0	0	0	0	0	0	0	0	0	0
wt_saf_neg_peak_58142	chr15	77327677	77327751	-	75	6	16	8	11	0	0	0	2	Yes	0.16151	0.473858	0.2404	0.149288	0	0	0	0.132218	N/A	No	0.291923	0	Yes	5.30738	-5.40897	1.76179	-3.07015	0.00213953	0.02869	other	intronic	0	0	0	0	0	0	0	0	0	0	0	1	0	0
wt_saf_neg_peak_58283	chr15	78782698	78783123	-	426	23	24	12	26	2	2	0	0	Yes	0.619122	0.710787	0.360601	0.352863	0.0607097	0.0620941	0	0	N/A	No	0.563503	0.0614019	Yes	11.1977	-2.92538	0.987019	-2.96386	0.00303808	0.0373699	protein_coding	intronic	1	0	0	0	0	0	0	0	0	0	0	0	0	0
wt_saf_neg_peak_58405	chr15	79486167	79486273	-	107	7	7	2	13	0	0	0	0	Yes	0.188428	0.207313	0.0601001	0.176431	0	0	0	0	N/A	No	0.151947	0	Yes	2.76989	-4.47566	1.99753	-2.24059	0.0250524	NA	protein_coding	intronic	0	0	0	0	0	0	0	0	0	0	0	1	0	0
wt_saf_neg_peak_58454	chr15	79652798	79653130	-	333	8	5	1	3	0	0	0	0	Yes	0.215347	0.148081	0.0300501	0.0407149	0	0	0	0	N/A	Yes	0.131159	0	Yes	2.39788	-4.26971	2.0988	-2.03436	0.0419155	NA	protein_coding	intronic	0	0	0	0	0	0	0	0	0	0	0	1	0	0
wt_saf_neg_peak_58458	chr15	79673813	79673928	-	116	13	7	8	3	2	0	0	4	Yes	0.349938	0.207313	0.2404	0.0407149	0.0607097	0	0	0.264436	N/A	Yes	0.265884	0.0303548	Yes	5.32978	-2.86696	1.4145	-2.02683	0.0426797	0.224317	other	intronic	0	0	0	0	0	0	0	0	0	0	0	0	0	0
wt_saf_neg_peak_58478	chr15	79750127	79750232	-	106	5	8	17	1	0	1	0	0	Yes	0.134592	0.236929	0.510851	0.0135716	0	0.031047	0	0	N/A	Yes	0.294124	0.0155235	Yes	5.65219	-3.98629	1.73908	-2.29218	0.0218951	0.14394	other	intronic	0	0	0	0	0	0	0	0	0	0	0	1	0	0
wt_saf_neg_peak_58601	chr15	81008424	81008583	-	160	16	3	6	1	0	0	0	3	Yes	0.430693	0.0888484	0.1803	0.0135716	0	0	0	0.198327	N/A	Yes	0.233281	0	Yes	4.31395	-5.11502	1.85089	-2.76355	0.00571767	0.0587692	other	intronic	0	0	0	0	0	0	0	0	0	0	0	0	0	0
wt_saf_neg_peak_58689	chr15	81328462	81328748	-	287	39	15	16	58	7	6	3	1	Yes	1.04981	0.444242	0.480801	0.787155	0.212484	0.186282	0.209053	0.0661091	N/A	No	0.658286	0.199383	Yes	15.0585	-1.46455	0.737498	-1.98583	0.0470516	0.238341	protein_coding	intronic	0	0	0	0	0	0	0	0	0	0	0	2	0	0
wt_saf_neg_peak_58806	chr15	82033578	82034298	-	721	11	19	11	2	4	0	0	2	Yes	0.296102	0.562706	0.330551	0.0271433	0.121419	0	0	0.132218	N/A	Yes	0.396453	0.0607097	Yes	8.10503	-2.43217	1.1038	-2.20344	0.0275635	0.168415	other	intronic	0	2	0	0	0	0	0	0	0	0	0	3	0	0
wt_saf_neg_peak_59150	chr15	84383222	84383309	-	88	8	7	4	0	0	0	0	0	Yes	0.215347	0.207313	0.1202	0	0	0	0	0	N/A	Yes	0.180953	0	Yes	3.31056	-4.73148	1.89961	-2.49077	0.0127467	0.101315	protein_coding	UTR3	0	0	0	0	0	0	0	0	0	0	0	0	0	0
wt_saf_neg_peak_59171	chr15	84805875	84806113	-	239	11	9	8	6	0	2	0	1	Yes	0.296102	0.266545	0.2404	0.0814298	0	0.0620941	0	0.0661091	N/A	Yes	0.267682	0.031047	Yes	5.37687	-2.84111	1.39887	-2.03101	0.0422543	0.222731	protein_coding	intronic	0	0	0	0	0	0	0	0	0	0	0	0	0	0
wt_saf_neg_peak_59271	chr15	85469361	85469937	-	577	12	7	10	2	0	0	0	2	Yes	0.32302	0.207313	0.300501	0.0271433	0	0	0	0.132218	N/A	Yes	0.276944	0	Yes	5.09908	-5.3524	1.75402	-3.05151	0.00227696	0.0300134	other	intronic	0	1	0	0	0	0	0	0	0	0	0	0	0	0
wt_saf_neg_peak_59379	chr15	86209242	86209530	-	289	2	6	5	4	0	0	0	0	Yes	0.0538367	0.177697	0.15025	0.0542865	0	0	0	0	N/A	Yes	0.127261	0	Yes	2.32278	-4.21446	2.0794	-2.02677	0.0426857	NA	other	intronic	0	1	0	0	0	0	0	0	0	0	0	0	0	0
wt_saf_neg_peak_59388	chr15	87568340	87568610	-	271	22	9	16	7	1	2	0	3	Yes	0.592203	0.266545	0.480801	0.0950014	0.0303548	0.0620941	0	0.198327	N/A	Yes	0.446516	0.0462245	Yes	8.92434	-3.01302	1.12876	-2.66932	0.00760057	0.0716365	other	intronic	0	0	0	0	0	0	0	0	0	0	1	0	0	0
wt_saf_neg_peak_59509	chr15	89347052	89347311	-	260	9	12	4	0	1	0	0	1	Yes	0.242265	0.355393	0.1202	0	0.0303548	0	0	0.0661091	N/A	Yes	0.239286	0.0151774	Yes	4.57488	-3.68968	1.77885	-2.0742	0.0380607	0.208227	other	intronic	1	0	0	1	0	0	0	0	0	0	0	0	0	0
wt_saf_neg_peak_59561	chr15	90647284	90647382	-	99	10	1	5	0	0	0	0	0	Yes	0.269183	0.0296161	0.15025	0	0	0	0	0	N/A	Yes	0.149683	0	Yes	2.7763	-4.47796	2.04483	-2.18989	0.0285319	NA	protein_coding	intronic	0	0	0	1	0	0	0	0	0	0	0	0	0	0
wt_saf_neg_peak_59591	chr15	90971642	90971842	-	201	32	51	50	54	21	9	0	1	Yes	0.861387	1.51042	1.5025	0.732868	0.637452	0.279423	0	0.0661091	N/A	Yes	1.29144	0.458438	Yes	30.3484	-1.22472	0.527461	-2.32192	0.0202372	0.136503	protein_coding	exonic	0	0	0	0	0	0	0	0	0	0	1	0	0	0
wt_saf_neg_peak_59628	chr15	91083467	91083548	-	82	1	6	8	2	0	0	0	2	Yes	0.0269183	0.177697	0.2404	0.0271433	0	0	0	0.132218	N/A	Yes	0.148339	0	Yes	2.71749	-4.43829	2.05224	-2.16265	0.030568	NA	other	intronic	0	1	0	0	0	0	0	0	0	0	0	0	0	0
wt_saf_neg_peak_59636	chr15	91556503	91556614	-	112	5	9	1	0	0	0	0	3	Yes	0.134592	0.266545	0.0300501	0	0	0	0	0.198327	N/A	Yes	0.143729	0	Yes	2.60123	-4.3845	2.06829	-2.11987	0.0340174	NA	protein_coding	intronic	0	0	0	0	0	0	0	0	0	0	0	0	0	0
wt_saf_neg_peak_59650	chr15	93233895	93234165	-	271	5	4	5	5	0	0	0	0	Yes	0.134592	0.118465	0.15025	0.0678582	0	0	0	0	N/A	No	0.134436	0	Yes	2.47089	-4.30632	2.02229	-2.12943	0.033219	NA	other	intronic	0	1	0	0	0	0	0	0	0	0	0	0	0	0
wt_saf_neg_peak_59685	chr15	93310915	93311253	-	339	9	14	15	16	0	4	0	2	Yes	0.242265	0.414626	0.450751	0.217146	0	0.124188	0	0.132218	N/A	No	0.369214	0.0620941	Yes	7.69899	-2.29464	1.11747	-2.05342	0.0400316	0.215241	protein_coding	intronic	0	0	0	0	0	0	0	0	0	0	1	1	0	0
wt_saf_neg_peak_59732	chr15	93578120	93578947	-	828	7	26	5	4	2	0	0	0	Yes	0.188428	0.770019	0.15025	0.0542865	0.0607097	0	0	0	N/A	Yes	0.369566	0.0303548	Yes	7.10829	-3.31311	1.40305	-2.36137	0.0182077	0.12765	protein_coding	intronic	0	0	0	0	0	0	0	0	0	1	0	1	0	0
wt_saf_neg_peak_59735	chr15	93590257	93590628	-	372	2	15	8	0	1	0	0	0	Yes	0.0538367	0.444242	0.2404	0	0.0303548	0	0	0	N/A	Yes	0.24616	0.0151774	Yes	4.68473	-3.72042	1.81899	-2.04532	0.0408231	0.217754	protein_coding	intronic	0	0	0	1	0	0	0	0	0	0	0	0	0	0
wt_saf_neg_peak_59747	chr15	94528413	94528698	-	286	2	11	6	5	0	0	0	0	Yes	0.0538367	0.325777	0.1803	0.0678582	0	0	0	0	N/A	Yes	0.186638	0	Yes	3.3885	-4.75997	1.93762	-2.45661	0.0140255	0.107995	protein_coding	intronic	0	0	0	0	0	0	0	0	0	0	0	0	0	0
wt_saf_neg_peak_59784	chr15	95802531	95803143	-	613	12	9	3	2	0	0	0	3	Yes	0.32302	0.266545	0.0901502	0.0271433	0	0	0	0.198327	N/A	Yes	0.226572	0	Yes	4.14102	-5.05642	1.84336	-2.74305	0.00608712	0.061317	lncRNA	intronic	0	0	0	0	0	0	0	0	0	0	0	0	0	0
wt_saf_neg_peak_59792	chr15	96152060	96153037	-	978	12	16	13	30	2	3	0	4	Yes	0.32302	0.473858	0.390651	0.407149	0.0607097	0.0931411	0	0.264436	N/A	No	0.395843	0.0769254	Yes	8.38068	-2.08898	0.992801	-2.10412	0.0353678	0.198601	lncRNA	intronic	0	2	0	2	0	0	0	0	0	0	0	0	0	0
wt_saf_neg_peak_59813	chr15	96246417	96247006	-	590	24	28	23	9	3	2	0	3	Yes	0.64604	0.829251	0.691152	0.122145	0.0910646	0.0620941	0	0.198327	N/A	Yes	0.722148	0.0765793	Yes	14.3441	-2.96475	0.870366	-3.40633	0.000658433	0.0115976	lncRNA	intronic	0	0	0	1	0	0	0	0	0	0	0	0	0	0
wt_saf_neg_peak_59833	chr15	96384819	96385099	-	281	13	11	7	0	0	1	0	3	Yes	0.349938	0.325777	0.21035	0	0	0.031047	0	0.198327	N/A	Yes	0.295355	0.0155235	Yes	5.64079	-3.99201	1.70752	-2.3379	0.0193923	0.132824	other	intronic	0	0	0	1	0	0	0	0	0	0	0	0	0	0
wt_saf_neg_peak_59913	chr15	96704960	96705058	-	99	8	2	10	0	0	0	0	4	Yes	0.215347	0.0592322	0.300501	0	0	0	0	0.264436	N/A	Yes	0.191693	0	Yes	3.55436	-4.82935	1.91481	-2.5221	0.0116656	0.0957232	other	intronic	0	0	0	0	0	0	0	0	0	0	0	0	0	0
wt_saf_neg_peak_60026	chr15	97788861	97789207	-	347	4	23	11	7	2	1	0	4	Yes	0.107673	0.681171	0.330551	0.0950014	0.0607097	0.031047	0	0.264436	N/A	Yes	0.373132	0.0458784	Yes	7.43748	-2.73641	1.22915	-2.22626	0.0259967	0.161722	other	intronic	0	0	0	0	0	0	0	0	0	0	0	0	0	0
wt_saf_neg_peak_60070	chr15	97999958	98000564	-	607	30	14	15	58	2	7	0	4	Yes	0.80755	0.414626	0.450751	0.787155	0.0607097	0.217329	0	0.264436	N/A	No	0.557642	0.139019	Yes	12.3347	-1.73811	0.83268	-2.08737	0.0368545	0.204021	protein_coding	intronic	0	0	1	0	0	0	0	0	0	0	0	0	0	0
wt_saf_neg_peak_60139	chr15	98585024	98585358	-	335	3	10	6	1	0	0	0	1	Yes	0.080755	0.296161	0.1803	0.0135716	0	0	0	0.0661091	N/A	Yes	0.185739	0	Yes	3.37929	-4.75648	1.91475	-2.48412	0.0129871	0.102552	other	intronic	0	0	0	0	0	0	0	0	0	0	0	0	0	0
wt_saf_neg_peak_60298	chr15	99416848	99417567	-	720	23	43	27	3	1	0	0	4	Yes	0.619122	1.27349	0.811352	0.0407149	0.0303548	0	0	0.264436	N/A	Yes	0.901322	0.0151774	Yes	16.6565	-5.59946	1.54418	-3.62616	0.000287665	0.00594842	other	intronic	0	0	0	0	0	0	0	0	0	0	3	2	0	0
wt_saf_neg_peak_60336	chr15	99726235	99726872	-	638	19	10	9	0	2	0	0	4	Yes	0.511448	0.296161	0.270451	0	0.0607097	0	0	0.264436	N/A	Yes	0.359353	0.0303548	Yes	7.04316	-3.2991	1.33882	-2.46419	0.0137324	0.106432	other	intronic	0	0	0	0	0	0	0	0	0	0	0	2	0	0
wt_saf_neg_peak_60403	chr15	100220559	100220738	-	180	5	5	3	4	0	0	0	0	Yes	0.134592	0.148081	0.0901502	0.0542865	0	0	0	0	N/A	Yes	0.124274	0	Yes	2.27247	-4.18793	2.06773	-2.02537	0.0428294	NA	other	intronic	0	0	0	0	0	0	0	0	0	0	0	1	0	0
wt_saf_neg_peak_60430	chr15	100468154	100468482	-	329	11	12	10	0	0	2	0	1	Yes	0.296102	0.355393	0.300501	0	0	0.0620941	0	0.0661091	N/A	Yes	0.317332	0.031047	Yes	6.27821	-3.08474	1.35116	-2.28303	0.0224284	0.146265	lncRNA	exonic	0	0	0	0	0	0	0	0	0	0	0	0	0	0
wt_saf_neg_peak_60466	chr15	100594147	100594296	-	150	3	6	7	7	0	0	0	0	Yes	0.080755	0.177697	0.21035	0.0950014	0	0	0	0	N/A	No	0.156267	0	Yes	2.86345	-4.51591	1.9713	-2.29083	0.0219734	NA	protein_coding	UTR5	0	0	0	0	0	0	0	0	0	0	0	1	0	0
wt_saf_neg_peak_60492	chr15	100663720	100664120	-	401	8	4	8	14	0	0	0	0	Yes	0.215347	0.118465	0.2404	0.190003	0	0	0	0	N/A	No	0.191404	0	Yes	3.53167	-4.82148	1.87986	-2.56481	0.0103231	0.0881526	protein_coding	intronic	0	0	0	0	0	0	0	0	0	0	0	0	0	0
wt_saf_neg_peak_60569	chr15	102168118	102168929	-	812	18	17	24	18	5	2	0	0	Yes	0.48453	0.503474	0.721202	0.244289	0.151774	0.0620941	0	0	N/A	Yes	0.569735	0.106934	Yes	12.0373	-2.14713	0.849943	-2.52621	0.0115302	0.0949915	other	intronic	0	0	0	1	0	0	0	0	0	0	1	1	0	0
wt_saf_neg_peak_60716	chr15	102703432	102703602	-	171	15	11	11	12	1	2	0	0	Yes	0.403775	0.325777	0.330551	0.16286	0.0303548	0.0620941	0	0	N/A	Yes	0.353368	0.0462245	Yes	7.17479	-2.66821	1.16379	-2.29268	0.0218663	0.143805	other	intronic	0	0	0	0	0	0	0	0	0	0	0	1	0	0
wt_saf_neg_peak_60802	chr15	103528190	103528372	-	183	12	23	12	26	4	1	0	2	Yes	0.32302	0.681171	0.360601	0.352863	0.121419	0.031047	0	0.132218	N/A	No	0.454931	0.0762332	Yes	9.39504	-2.29949	0.994095	-2.31315	0.0207144	0.138727	other	intronic	0	0	0	0	0	0	0	0	0	0	0	0	0	0
wt_saf_neg_peak_60841	chr16	3902124	3902342	-	219	9	2	6	3	0	0	0	3	Yes	0.242265	0.0592322	0.1803	0.0407149	0	0	0	0.198327	N/A	Yes	0.160599	0	Yes	2.97258	-4.57502	1.97567	-2.31568	0.0205757	0.13804	other	intronic	0	0	0	0	0	0	0	0	0	0	0	1	0	0
wt_saf_neg_peak_60854	chr16	3967677	3967899	-	223	10	5	3	4	0	0	0	0	Yes	0.269183	0.148081	0.0901502	0.0542865	0	0	0	0	N/A	Yes	0.169138	0	Yes	3.10507	-4.64119	1.94313	-2.38852	0.0169165	0.122015	protein_coding	intronic	0	0	0	0	0	0	0	0	0	0	1	1	0	0
wt_saf_neg_peak_61097	chr16	4710591	4710771	-	181	15	11	13	1	0	3	0	4	Yes	0.403775	0.325777	0.390651	0.0135716	0	0.0931411	0	0.264436	N/A	Yes	0.373401	0.0465706	Yes	7.56328	-2.73706	1.17423	-2.33094	0.0197567	0.134421	protein_coding	UTR3	0	0	0	1	0	0	0	0	0	0	0	0	0	0
wt_saf_neg_peak_61127	chr16	4884741	4885100	-	360	5	10	9	0	0	0	0	3	Yes	0.134592	0.296161	0.270451	0	0	0	0	0.198327	N/A	Yes	0.233735	0	Yes	4.27356	-5.09479	1.81469	-2.80752	0.00499243	0.0533979	other	intronic	0	0	0	0	0	0	0	0	0	0	0	1	0	0
wt_saf_neg_peak_61164	chr16	5041540	5041629	-	90	22	28	10	67	5	5	0	2	Yes	0.592203	0.829251	0.300501	0.9093	0.151774	0.155235	0	0.132218	N/A	No	0.573985	0.153505	Yes	12.7179	-1.62616	0.798341	-2.03693	0.0416571	0.220603	protein_coding	intronic	0	0	0	0	0	0	0	0	0	0	0	2	0	0
wt_saf_neg_peak_61235	chr16	8618989	8619482	-	494	13	10	6	11	0	0	0	4	Yes	0.349938	0.296161	0.1803	0.149288	0	0	0	0.264436	N/A	No	0.275467	0	Yes	5.04449	-5.33946	1.7607	-3.03257	0.0024248	0.0315058	other	intronic	0	0	0	0	0	0	0	0	0	0	0	0	0	0
wt_saf_neg_peak_61346	chr16	9982123	9982504	-	382	5	5	6	0	0	0	0	0	Yes	0.134592	0.148081	0.1803	0	0	0	0	0	N/A	Yes	0.154324	0	Yes	2.83369	-4.50316	1.95887	-2.29885	0.0215134	NA	protein_coding	intronic	0	1	0	0	0	0	0	0	0	0	0	0	0	0
wt_saf_neg_peak_61363	chr16	10276355	10276571	-	217	8	3	6	6	0	0	0	0	Yes	0.215347	0.0888484	0.1803	0.0814298	0	0	0	0	N/A	Yes	0.161498	0	Yes	2.98179	-4.57887	1.95294	-2.34461	0.0190472	0.1314	other	intronic	0	0	0	0	0	0	0	0	0	0	0	0	0	0
wt_saf_neg_peak_61380	chr16	10532561	10532639	-	79	10	5	1	0	0	0	0	0	Yes	0.269183	0.148081	0.0300501	0	0	0	0	0	N/A	Yes	0.149105	0	Yes	2.73092	-4.45786	2.04865	-2.176	0.0295551	NA	protein_coding	intronic	0	0	0	0	0	0	0	0	0	0	0	0	0	0
wt_saf_neg_peak_61409	chr16	11055885	11056521	-	637	13	19	17	7	6	0	0	4	Yes	0.349938	0.562706	0.510851	0.0950014	0.182129	0	0	0.264436	N/A	Yes	0.474498	0.0910646	Yes	9.99884	-2.11346	0.972844	-2.17245	0.0298215	0.177383	other	intronic	0	0	0	0	0	0	0	0	0	0	0	0	0	0
wt_saf_neg_peak_61506	chr16	11810409	11810485	-	77	3	5	8	0	0	0	0	1	Yes	0.080755	0.148081	0.2404	0	0	0	0	0.0661091	N/A	Yes	0.156412	0	Yes	2.8748	-4.52071	1.97477	-2.28924	0.0220654	NA	protein_coding	intronic	0	1	0	0	0	0	0	0	0	0	0	0	0	0
wt_saf_neg_peak_61513	chr16	11827378	11827461	-	84	2	8	7	2	0	0	0	0	Yes	0.0538367	0.236929	0.21035	0.0271433	0	0	0	0	N/A	Yes	0.167039	0	Yes	3.04839	-4.60602	1.96777	-2.34073	0.0192458	0.132248	protein_coding	intronic	0	0	0	0	0	0	0	0	0	0	0	0	0	0
wt_saf_neg_peak_61645	chr16	13750295	13750371	-	77	5	7	2	0	0	0	3	0	Yes	0.134592	0.207313	0.0601001	0	0	0	0.209053	0	N/A	Yes	0.134001	0	Yes	2.43685	-4.28968	2.05465	-2.08779	0.0368168	NA	other	intronic	0	0	0	1	0	0	0	0	0	0	0	0	0	0
wt_saf_neg_peak_61703	chr16	14026334	14026457	-	124	6	8	2	4	0	0	0	2	Yes	0.16151	0.236929	0.0601001	0.0542865	0	0	0	0.132218	N/A	Yes	0.152846	0	Yes	2.7791	-4.47972	1.99863	-2.24139	0.0250009	NA	other	intronic	0	0	0	1	0	0	0	0	0	0	0	0	0	0
wt_saf_neg_peak_61763	chr16	15420532	15421352	-	821	10	9	10	1	2	0	0	2	Yes	0.269183	0.266545	0.300501	0.0135716	0.0607097	0	0	0.132218	N/A	Yes	0.278743	0.0303548	Yes	5.55582	-2.92893	1.39301	-2.10259	0.0355018	0.199079	other	intronic	0	0	0	2	0	0	0	0	0	0	0	0	0	0
wt_saf_neg_peak_61766	chr16	15472648	15473966	-	1319	42	28	31	2	1	1	0	4	Yes	1.13057	0.829251	0.931552	0.0271433	0.0303548	0.031047	0	0.264436	N/A	Yes	0.963791	0.030701	Yes	18.1662	-4.70744	1.14999	-4.09345	4.25003e-05	0.00120837	other	intronic	0	1	0	0	0	0	0	0	0	0	0	0	0	0
wt_saf_neg_peak_61775	chr16	15540009	15540462	-	454	9	14	6	2	0	0	0	0	Yes	0.242265	0.414626	0.1803	0.0271433	0	0	0	0	N/A	Yes	0.279064	0	Yes	5.08133	-5.34832	1.7635	-3.03279	0.00242302	0.0314857	other	intronic	0	0	0	1	0	0	0	0	0	0	0	0	0	0
wt_saf_neg_peak_61846	chr16	15941923	15942164	-	242	21	3	6	3	1	1	0	1	Yes	0.565285	0.0888484	0.1803	0.0407149	0.0303548	0.031047	0	0.0661091	N/A	Yes	0.278145	0.030701	Yes	5.59921	-2.92869	1.448	-2.02258	0.0431163	0.225778	protein_coding	intronic	0	0	0	0	0	0	0	0	0	0	0	0	0	0
wt_saf_neg_peak_61893	chr16	16046532	16046645	-	114	10	7	1	1	0	0	0	2	Yes	0.269183	0.207313	0.0300501	0.0135716	0	0	0	0.132218	N/A	Yes	0.168849	0	Yes	3.08238	-4.63179	1.99566	-2.32093	0.0202905	0.136774	protein_coding	intronic	0	1	0	0	0	0	0	0	0	0	0	0	0	0
wt_saf_neg_peak_62022	chr16	16542166	16542248	-	83	10	5	3	5	0	0	0	0	Yes	0.269183	0.148081	0.0901502	0.0678582	0	0	0	0	N/A	Yes	0.169138	0	Yes	3.10507	-4.64119	1.94313	-2.38852	0.0169165	0.122015	protein_coding	intronic	0	1	0	0	0	0	0	0	0	0	0	0	0	0
wt_saf_neg_peak_62026	chr16	16549438	16549829	-	392	8	14	3	32	1	0	0	0	Yes	0.215347	0.414626	0.0901502	0.434292	0.0303548	0	0	0	N/A	No	0.240041	0.0151774	Yes	4.57275	-3.68921	1.79798	-2.05187	0.0401826	0.215721	protein_coding	intronic	0	0	0	0	0	0	0	0	0	0	1	2	0	0
wt_saf_neg_peak_62053	chr16	16756596	16757050	-	455	10	14	5	1	1	0	0	4	Yes	0.269183	0.414626	0.15025	0.0135716	0.0303548	0	0	0.264436	N/A	Yes	0.27802	0.0151774	Yes	5.27994	-3.90529	1.73809	-2.24689	0.024647	0.156055	protein_coding	intronic	0	0	0	1	0	0	0	0	0	0	0	0	0	0
wt_saf_neg_peak_62078	chr16	17053871	17054072	-	202	24	20	30	13	3	5	0	0	Yes	0.64604	0.592322	0.901502	0.176431	0.0910646	0.155235	0	0	N/A	Yes	0.713288	0.12315	Yes	14.9483	-2.26664	0.776343	-2.91964	0.00350433	0.0415104	other	intronic	0	0	1	0	0	0	0	0	0	0	0	1	0	0
wt_saf_neg_peak_62079	chr16	17079266	17079628	-	363	16	12	2	17	0	0	0	4	Yes	0.430693	0.355393	0.0601001	0.230718	0	0	0	0.264436	N/A	No	0.282062	0	Yes	5.14721	-5.37089	1.81143	-2.96499	0.00302691	0.0372613	other	intronic	0	0	0	0	0	0	0	0	0	0	0	2	0	0
wt_saf_neg_peak_62226	chr16	17613786	17613881	-	96	5	3	5	0	0	0	0	2	Yes	0.134592	0.0888484	0.15025	0	0	0	0	0.132218	N/A	Yes	0.124563	0	Yes	2.29516	-4.19977	2.06495	-2.03384	0.0419679	NA	other	intronic	0	0	0	1	0	0	0	0	0	0	0	0	0	0
wt_saf_neg_peak_62294	chr16	18002832	18003293	-	462	13	18	6	0	0	0	0	0	Yes	0.349938	0.53309	0.1803	0	0	0	0	0	N/A	Yes	0.354443	0	Yes	6.45032	-5.69357	1.71159	-3.32648	0.000879518	0.0145371	other	intronic	0	0	0	0	0	0	0	0	0	0	0	0	0	0
wt_saf_neg_peak_62364	chr16	18425985	18426074	-	90	8	21	9	6	0	2	0	1	Yes	0.215347	0.621938	0.270451	0.0814298	0	0.0620941	0	0.0661091	N/A	Yes	0.369245	0.031047	Yes	7.17313	-3.29105	1.34721	-2.44287	0.014571	0.110735	protein_coding	intronic	0	0	0	0	0	0	0	0	0	0	0	0	0	0
wt_saf_neg_peak_62417	chr16	20253070	20253288	-	219	5	8	9	0	0	1	0	3	Yes	0.134592	0.236929	0.270451	0	0	0.031047	0	0.198327	N/A	Yes	0.21399	0.0155235	Yes	4.1556	-3.52169	1.79554	-1.96136	0.0498375	0.247268	other	intronic	0	1	0	0	0	0	0	0	0	0	0	0	0	0
wt_saf_neg_peak_62543	chr16	21675653	21676281	-	629	6	11	6	0	1	0	0	4	Yes	0.16151	0.325777	0.1803	0	0.0303548	0	0	0.264436	N/A	Yes	0.222529	0.0151774	Yes	4.27374	-3.58351	1.78918	-2.00288	0.0451901	0.232368	protein_coding	intronic	0	0	0	1	0	0	0	0	0	0	0	1	0	0
wt_saf_neg_peak_62733	chr16	22892624	22892902	-	279	4	10	12	3	1	0	0	0	Yes	0.107673	0.296161	0.360601	0.0407149	0.0303548	0	0	0	N/A	Yes	0.254812	0.0151774	Yes	4.88742	-3.78226	1.7686	-2.13856	0.0324716	0.187718	lncRNA	intronic	0	0	2	0	0	0	0	0	0	0	0	0	0	0
wt_saf_neg_peak_62758	chr16	23257752	23257983	-	232	21	39	19	8	4	11	0	3	Yes	0.565285	1.15503	0.570951	0.108573	0.121419	0.341517	0	0.198327	N/A	Yes	0.763755	0.231468	Yes	17.3499	-1.43745	0.699394	-2.05528	0.0398521	0.214623	other	intronic	0	0	1	0	2	0	0	0	0	0	0	0	0	0
wt_saf_neg_peak_62802	chr16	28842953	28843088	-	136	13	2	6	2	0	0	0	0	Yes	0.349938	0.0592322	0.1803	0.0271433	0	0	0	0	N/A	Yes	0.19649	0	Yes	3.63866	-4.86856	1.91467	-2.54276	0.0109981	0.0919889	protein_coding	intronic	0	0	0	0	0	0	0	0	0	0	0	0	0	0
wt_saf_neg_peak_62816	chr16	28867005	28867332	-	328	25	36	18	29	4	3	0	0	Yes	0.672958	1.06618	0.540901	0.393577	0.121419	0.0931411	0	0	N/A	No	0.760013	0.10728	Yes	15.4337	-2.54811	0.799544	-3.18695	0.0014378	0.0212073	protein_coding	intronic	0	0	0	0	0	0	0	0	0	0	0	0	0	0
wt_saf_neg_peak_62821	chr16	28875180	28875393	-	214	6	33	13	15	0	6	0	0	Yes	0.16151	0.977332	0.390651	0.203574	0	0.186282	0	0	N/A	No	0.509831	0.0931411	Yes	10.6311	-2.15394	1.04917	-2.053	0.0400729	0.215375	protein_coding	intronic	0	0	0	1	0	0	0	0	0	0	0	0	0	0
wt_saf_neg_peak_62826	chr16	28882643	28882970	-	328	29	20	19	35	8	4	0	1	Yes	0.780632	0.592322	0.570951	0.475007	0.242839	0.124188	0	0.0661091	N/A	No	0.647968	0.183513	Yes	14.5853	-1.55659	0.722579	-2.15422	0.0312233	0.182938	protein_coding	intronic	0	0	0	0	0	0	0	0	0	0	0	0	0	0
wt_saf_neg_peak_62829	chr16	28892267	28892348	-	82	20	11	19	20	4	3	0	0	Yes	0.538367	0.325777	0.570951	0.271433	0.121419	0.0931411	0	0	N/A	No	0.478365	0.10728	Yes	10.395	-1.89486	0.882825	-2.14636	0.0318441	0.185275	protein_coding	intronic	0	0	0	0	0	0	0	0	0	0	0	0	0	0
wt_saf_neg_peak_62836	chr16	28904179	28904253	-	75	8	4	17	17	1	0	0	0	Yes	0.215347	0.118465	0.510851	0.230718	0.0303548	0	0	0	N/A	No	0.281554	0.0151774	Yes	5.4345	-3.94184	1.75789	-2.24237	0.0249372	0.157334	protein_coding	intronic	0	0	0	0	0	0	0	0	0	0	0	0	0	0
wt_saf_neg_peak_62842	chr16	28913798	28914299	-	502	50	49	46	63	14	21	0	0	Yes	1.34592	1.45119	1.3823	0.855013	0.424968	0.651988	0	0	N/A	No	1.39314	0.538478	Yes	33.5139	-1.09905	0.466881	-2.35403	0.0185709	0.129257	protein_coding	intronic	0	0	0	0	0	0	0	0	0	0	0	0	0	0
wt_saf_neg_peak_62859	chr16	29877877	29878210	-	334	5	10	6	0	0	0	0	2	Yes	0.134592	0.296161	0.1803	0	0	0	0	0.132218	N/A	Yes	0.203684	0	Yes	3.71233	-4.89339	1.86126	-2.62906	0.00856201	0.0777375	other	intronic	0	0	0	0	0	0	0	0	0	0	1	0	0	0
wt_saf_neg_peak_62886	chr16	30037704	30038115	-	412	26	24	9	8	2	4	0	3	Yes	0.699877	0.710787	0.270451	0.108573	0.0607097	0.124188	0	0.198327	N/A	Yes	0.560371	0.0924489	Yes	11.603	-2.3263	0.909822	-2.55687	0.0105617	0.0895369	lncRNA	intronic	1	0	0	0	0	0	0	0	0	0	0	0	0	0
wt_saf_neg_peak_62898	chr16	30141092	30141375	-	284	8	3	7	8	0	0	0	1	Yes	0.215347	0.0888484	0.21035	0.108573	0	0	0	0.0661091	N/A	No	0.171515	0	Yes	3.16886	-4.66579	1.92981	-2.41774	0.0156171	0.115709	other	intronic	0	0	0	0	0	0	0	0	0	0	0	0	0	0
wt_saf_neg_peak_62902	chr16	30158482	30158688	-	207	7	12	9	0	0	0	0	4	Yes	0.188428	0.355393	0.270451	0	0	0	0	0.264436	N/A	Yes	0.271424	0	Yes	4.95805	-5.31041	1.76381	-3.01076	0.00260596	0.0332577	other	intronic	0	0	0	0	0	0	0	0	0	0	0	0	0	0
wt_saf_neg_peak_62918	chr16	30198880	30199273	-	394	34	44	29	32	14	12	0	4	Yes	0.915223	1.30311	0.871452	0.434292	0.424968	0.372565	0	0.264436	N/A	Yes	1.02993	0.398766	Yes	24.6891	-1.09521	0.539047	-2.03176	0.0421784	0.222481	other	intronic	0	0	0	2	0	0	0	0	0	0	0	0	0	0
wt_saf_neg_peak_62983	chr16	30396051	30396280	-	230	5	3	6	5	0	0	0	2	Yes	0.134592	0.0888484	0.1803	0.0678582	0	0	0	0.132218	N/A	No	0.13458	0	Yes	2.48223	-4.31181	2.02994	-2.12411	0.0336608	NA	other	intronic	0	0	0	0	0	0	0	0	0	0	1	3	0	0
wt_saf_neg_peak_62995	chr16	30536325	30536415	-	91	5	6	2	2	0	0	0	0	Yes	0.134592	0.177697	0.0601001	0.0271433	0	0	0	0	N/A	Yes	0.12413	0	Yes	2.26112	-4.18188	2.08705	-2.00373	0.0450988	NA	protein_coding	intronic	0	0	0	1	0	0	0	0	0	0	0	0	0	0
wt_saf_neg_peak_63018	chr16	30651807	30652138	-	332	9	3	7	0	0	0	0	4	Yes	0.242265	0.0888484	0.21035	0	0	0	0	0.264436	N/A	Yes	0.180488	0	Yes	3.33538	-4.74032	1.9124	-2.47873	0.0131851	0.103615	other	intronic	0	0	1	0	0	0	0	0	0	0	0	1	0	0
wt_saf_neg_peak_63177	chr16	31386231	31386312	-	82	8	5	5	0	0	0	0	1	Yes	0.215347	0.148081	0.15025	0	0	0	0	0.0661091	N/A	Yes	0.171226	0	Yes	3.14617	-4.65721	1.9168	-2.42968	0.0151123	0.11332	other	intronic	0	0	0	1	0	0	0	0	0	0	0	0	0	0
wt_saf_neg_peak_63182	chr16	31506550	31506803	-	254	7	4	5	5	0	0	0	0	Yes	0.188428	0.118465	0.15025	0.0678582	0	0	0	0	N/A	Yes	0.152381	0	Yes	2.80393	-4.49042	1.96689	-2.28301	0.0224299	NA	other	intronic	0	0	0	0	0	0	0	0	0	0	1	0	0	0
wt_saf_neg_peak_63187	chr16	31554956	31555355	-	400	6	5	3	2	0	0	0	0	Yes	0.16151	0.148081	0.0901502	0.0271433	0	0	0	0	N/A	Yes	0.133247	0	Yes	2.43899	-4.29073	2.03435	-2.10914	0.0349324	NA	other	intronic	0	0	0	0	0	0	0	0	0	0	1	1	0	0
wt_saf_neg_peak_63319	chr16	32832940	32833074	-	135	11	16	17	13	2	2	0	4	Yes	0.296102	0.473858	0.510851	0.176431	0.0607097	0.0620941	0	0.264436	N/A	Yes	0.426937	0.0614019	Yes	8.72896	-2.52462	1.03923	-2.42931	0.0151276	0.113401	protein_coding	intronic	0	0	0	1	0	0	0	0	0	0	0	0	0	0
wt_saf_neg_peak_63380	chr16	33521192	33521526	-	335	18	6	8	10	0	0	0	4	Yes	0.48453	0.177697	0.2404	0.135716	0	0	0	0.264436	N/A	No	0.300876	0	Yes	5.54832	-5.47727	1.75169	-3.12685	0.0017669	0.0247791	other	intronic	0	0	0	0	0	0	0	0	0	0	0	0	0	0
wt_saf_neg_peak_63384	chr16	33645575	33645704	-	130	8	8	4	1	0	0	0	0	Yes	0.215347	0.236929	0.1202	0.0135716	0	0	0	0	N/A	Yes	0.190825	0	Yes	3.48629	-4.80601	1.88149	-2.55437	0.0106381	0.0899407	other	intronic	0	0	0	0	0	0	0	0	0	0	0	0	0	0
wt_saf_neg_peak_63385	chr16	33811259	33811441	-	183	4	5	6	0	0	0	0	3	Yes	0.107673	0.148081	0.1803	0	0	0	0	0.198327	N/A	Yes	0.145351	0	Yes	2.66717	-4.41486	1.9898	-2.21874	0.0265041	NA	other	intronic	0	0	0	0	0	0	0	0	0	0	1	1	0	0
wt_saf_neg_peak_63388	chr16	33950388	33950522	-	135	21	12	7	26	1	2	0	3	Yes	0.565285	0.355393	0.21035	0.352863	0.0303548	0.0620941	0	0.198327	N/A	No	0.37701	0.0462245	Yes	7.60134	-2.76341	1.17398	-2.35389	0.0185783	0.129283	other	intronic	0	0	0	0	0	0	0	0	0	0	0	1	0	0
wt_saf_neg_peak_63398	chr16	34004263	34004948	-	686	21	9	5	7	0	2	0	0	Yes	0.565285	0.266545	0.15025	0.0950014	0	0.0620941	0	0	N/A	Yes	0.32736	0.031047	Yes	6.48085	-3.13833	1.38762	-2.26167	0.023718	0.151944	protein_coding	intronic	0	0	0	0	0	0	0	0	0	0	1	0	0	0
wt_saf_neg_peak_63399	chr16	34011460	34011992	-	533	16	6	11	7	0	1	0	0	Yes	0.430693	0.177697	0.330551	0.0950014	0	0.031047	0	0	N/A	Yes	0.31298	0.0155235	Yes	6.01001	-4.08625	1.70463	-2.39714	0.0165234	0.120102	protein_coding	intronic	0	0	0	0	0	0	0	0	0	0	0	0	0	0
wt_saf_neg_peak_63414	chr16	34063515	34063821	-	307	17	9	9	4	0	1	0	0	Yes	0.457612	0.266545	0.270451	0.0542865	0	0.031047	0	0	N/A	Yes	0.331536	0.0155235	Yes	6.32956	-4.1656	1.68494	-2.47225	0.0134267	0.104919	protein_coding	intronic	0	0	0	0	0	0	0	0	0	0	0	0	0	0
wt_saf_neg_peak_63453	chr16	34453193	34453392	-	200	7	7	1	0	0	0	0	2	Yes	0.188428	0.207313	0.0300501	0	0	0	0	0.132218	N/A	Yes	0.14193	0	Yes	2.58282	-4.37577	2.06292	-2.12115	0.0339088	NA	protein_coding	intronic	0	0	0	0	0	0	0	0	0	0	0	0	0	0
wt_saf_neg_peak_63461	chr16	34514202	34514580	-	379	9	9	4	0	0	0	0	3	Yes	0.242265	0.266545	0.1202	0	0	0	0	0.198327	N/A	Yes	0.20967	0	Yes	3.82854	-4.94148	1.85123	-2.66929	0.00760114	0.0716365	other	intronic	0	0	0	0	0	0	0	0	0	0	0	0	0	0
wt_saf_neg_peak_63475	chr16	34621923	34622250	-	328	9	5	5	0	0	0	0	2	Yes	0.242265	0.148081	0.15025	0	0	0	0	0.132218	N/A	Yes	0.180199	0	Yes	3.31269	-4.73219	1.89943	-2.49138	0.0127248	0.101253	other	intronic	0	1	0	0	0	0	0	0	0	0	0	0	0	0
wt_saf_neg_peak_63483	chr16	35303816	35304214	-	399	14	8	8	11	0	1	0	1	Yes	0.376857	0.236929	0.2404	0.149288	0	0.031047	0	0.0661091	N/A	No	0.284729	0.0155235	Yes	5.4672	-3.94467	1.71646	-2.29814	0.0215539	0.142363	other	intronic	0	0	0	0	0	0	0	0	0	0	0	0	0	0
wt_saf_neg_peak_63503	chr16	35395984	35396122	-	139	9	4	14	2	0	1	0	1	Yes	0.242265	0.118465	0.420701	0.0271433	0	0.031047	0	0.0661091	N/A	Yes	0.260477	0.0155235	Yes	5.05413	-3.8196	1.76216	-2.16757	0.0301916	0.178841	other	intronic	0	0	0	1	0	0	0	0	0	0	0	0	0	0
wt_saf_neg_peak_63547	chr16	35644648	35644760	-	113	4	5	7	3	0	0	0	0	Yes	0.107673	0.148081	0.21035	0.0407149	0	0	0	0	N/A	Yes	0.155368	0	Yes	2.85424	-4.51191	1.9634	-2.29801	0.0215614	NA	other	intronic	0	0	1	0	0	0	0	0	0	0	1	0	0	0
wt_saf_neg_peak_63587	chr16	35799110	35799546	-	437	14	14	0	10	1	0	0	3	Yes	0.376857	0.414626	0	0.135716	0.0303548	0	0	0.198327	N/A	Yes	0.263827	0.0151774	Yes	5.01064	-3.83065	1.88757	-2.02941	0.0424167	0.223359	other	intronic	0	0	0	1	0	0	0	0	0	0	0	1	0	0
wt_saf_neg_peak_63666	chr16	36868342	36868610	-	269	10	1	5	0	0	0	0	2	Yes	0.269183	0.0296161	0.15025	0	0	0	0	0.132218	N/A	Yes	0.149683	0	Yes	2.7763	-4.47796	2.04483	-2.18989	0.0285319	NA	protein_coding	intronic	0	0	0	1	0	0	0	0	0	0	0	1	0	0
wt_saf_neg_peak_63751	chr16	38539488	38539579	-	92	17	30	9	34	4	1	0	0	Yes	0.457612	0.888483	0.270451	0.461436	0.121419	0.031047	0	0	N/A	No	0.538849	0.0762332	Yes	10.8965	-2.54157	0.981082	-2.59058	0.00958156	0.0838972	protein_coding	intronic	0	0	0	0	0	0	0	0	0	0	0	1	0	0
wt_saf_neg_peak_63763	chr16	38605024	38605423	-	400	8	8	8	0	0	0	0	0	Yes	0.215347	0.236929	0.2404	0	0	0	0	0	N/A	Yes	0.230892	0	Yes	4.23458	-5.08361	1.80405	-2.81789	0.00483407	0.0522056	protein_coding	intronic	0	1	0	0	0	0	0	0	0	0	1	0	0	0
wt_saf_neg_peak_63764	chr16	38606606	38606799	-	194	10	6	6	11	0	0	0	3	Yes	0.269183	0.177697	0.1803	0.149288	0	0	0	0.198327	N/A	No	0.20906	0	Yes	3.84202	-4.94567	1.84226	-2.68456	0.00726254	0.0693967	protein_coding	exonic	0	0	0	0	0	0	0	0	0	0	0	0	0	0
wt_saf_neg_peak_63801	chr16	42313737	42314109	-	373	11	15	18	15	0	0	0	0	Yes	0.296102	0.444242	0.540901	0.203574	0	0	0	0	N/A	Yes	0.427082	0	Yes	7.83499	-5.96924	1.65712	-3.60217	0.000315568	0.00642282	protein_coding	intronic	0	0	0	0	0	0	0	0	0	0	0	0	0	0
wt_saf_neg_peak_63890	chr16	44536518	44536891	-	374	7	8	6	4	0	0	0	1	Yes	0.188428	0.236929	0.1803	0.0542865	0	0	0	0.0661091	N/A	Yes	0.201886	0	Yes	3.69392	-4.88732	1.85175	-2.63929	0.00830794	0.0761573	protein_coding	intronic	0	0	0	0	0	0	0	0	0	0	0	0	0	0
wt_saf_neg_peak_63926	chr16	45724159	45724281	-	123	11	11	4	10	1	0	0	2	Yes	0.296102	0.325777	0.1202	0.135716	0.0303548	0	0	0.132218	N/A	Yes	0.24736	0.0151774	Yes	4.73219	-3.74165	1.76854	-2.11567	0.0343728	0.194993	protein_coding	exonic	0	0	0	0	0	0	0	0	0	0	0	0	0	0
wt_saf_neg_peak_63945	chr16	45772097	45772559	-	463	26	38	27	39	13	3	0	3	Yes	0.699877	1.12541	0.811352	0.529294	0.394613	0.0931411	0	0.198327	N/A	No	0.87888	0.243877	Yes	19.6078	-1.58012	0.662802	-2.384	0.0171256	0.122968	protein_coding	intronic	0	0	0	0	0	0	0	0	0	0	0	0	0	0
wt_saf_neg_peak_63956	chr16	45799248	45799375	-	128	6	7	5	1	0	0	0	1	Yes	0.16151	0.207313	0.15025	0.0135716	0	0	0	0.0661091	N/A	Yes	0.173024	0	Yes	3.16459	-4.66431	1.91159	-2.44001	0.0146867	0.111238	protein_coding	intronic	0	0	0	0	0	0	0	0	0	0	0	0	0	0
wt_saf_neg_peak_63958	chr16	45801480	45801651	-	172	43	20	35	85	7	3	0	1	Yes	1.15749	0.592322	1.05175	1.15359	0.212484	0.0931411	0	0.0661091	N/A	No	0.933854	0.152812	Yes	19.4572	-2.35205	0.711385	-3.3063	0.000945383	0.0153484	protein_coding	exonic	0	0	0	0	0	0	0	0	0	0	0	0	0	0
wt_saf_neg_peak_63964	chr16	45959020	45959123	-	104	11	4	5	0	0	0	0	0	Yes	0.296102	0.118465	0.15025	0	0	0	0	0	N/A	Yes	0.188272	0	Yes	3.47	-4.80014	1.89547	-2.53242	0.0113278	0.093963	other	intronic	0	0	0	0	0	0	0	0	0	0	0	0	0	0
wt_saf_neg_peak_64061	chr16	48596440	48596601	-	162	10	8	2	0	0	0	0	0	Yes	0.269183	0.236929	0.0601001	0	0	0	0	0	N/A	Yes	0.188738	0	Yes	3.44518	-4.79134	1.91933	-2.49636	0.0125474	0.100344	other	intronic	0	1	0	0	0	0	0	0	0	0	0	0	0	0
wt_saf_neg_peak_64064	chr16	48608118	48608271	-	154	3	8	6	1	0	0	0	0	Yes	0.080755	0.236929	0.1803	0.0135716	0	0	0	0	N/A	Yes	0.165995	0	Yes	3.02784	-4.59763	1.9502	-2.35751	0.0183977	0.128515	other	intronic	0	0	0	0	0	0	0	0	0	0	0	0	0	0
wt_saf_neg_peak_64129	chr16	50209660	50209860	-	201	10	9	11	20	0	1	0	0	Yes	0.269183	0.266545	0.330551	0.271433	0	0.031047	0	0	N/A	No	0.28876	0.0155235	Yes	5.53807	-3.96084	1.70804	-2.31894	0.0203982	0.137297	protein_coding	intronic	0	0	0	0	0	0	0	0	0	0	0	0	0	0
wt_saf_neg_peak_64248	chr16	52433671	52433979	-	309	6	5	3	4	0	0	0	0	Yes	0.16151	0.148081	0.0901502	0.0542865	0	0	0	0	N/A	Yes	0.133247	0	Yes	2.43899	-4.29073	2.03435	-2.10914	0.0349324	NA	protein_coding	intronic	0	0	0	0	0	0	0	0	0	0	0	0	0	0
wt_saf_neg_peak_64290	chr16	55893242	55893518	-	277	11	12	24	29	4	2	4	0	Yes	0.296102	0.355393	0.721202	0.393577	0.121419	0.0620941	0.278737	0	N/A	No	0.457566	0.0917567	Yes	9.77389	-2.05228	0.950519	-2.15912	0.0308412	0.181478	protein_coding	intronic	0	0	0	0	0	0	0	0	0	0	0	1	0	0
wt_saf_neg_peak_64414	chr16	57301129	57301689	-	561	23	15	16	18	2	1	0	2	Yes	0.619122	0.444242	0.480801	0.244289	0.0607097	0.031047	0	0.132218	N/A	No	0.514722	0.0458784	Yes	10.1309	-3.2218	1.08584	-2.96709	0.00300629	0.0370694	other	intronic	0	1	0	0	0	0	0	0	0	0	0	0	0	0
wt_saf_neg_peak_64453	chr16	57386810	57387043	-	234	19	17	14	7	0	5	0	0	Yes	0.511448	0.503474	0.420701	0.0950014	0	0.155235	0	0	N/A	Yes	0.478541	0.0776176	Yes	9.9378	-2.35108	0.991722	-2.3707	0.0177542	0.125806	protein_coding	intronic	0	0	0	0	0	0	0	0	0	0	0	0	0	0
wt_saf_neg_peak_64454	chr16	57389249	57389541	-	293	17	16	17	16	5	2	0	1	Yes	0.457612	0.473858	0.510851	0.217146	0.151774	0.0620941	0	0.0661091	N/A	Yes	0.480774	0.106934	Yes	10.3856	-1.90161	0.877465	-2.16716	0.0302226	0.178973	protein_coding	intronic	0	0	0	0	0	0	0	0	0	0	0	0	0	0
wt_saf_neg_peak_64476	chr16	57425839	57425931	-	93	5	14	10	8	1	1	0	0	Yes	0.134592	0.414626	0.300501	0.108573	0.0303548	0.031047	0	0	N/A	Yes	0.283239	0.030701	Yes	5.61621	-2.92508	1.39324	-2.09949	0.0357739	0.200107	protein_coding	intronic	0	0	0	0	0	0	0	0	0	0	0	0	0	0
wt_saf_neg_peak_64494	chr16	57463199	57463431	-	233	1	12	14	6	0	0	0	1	Yes	0.0269183	0.355393	0.420701	0.0814298	0	0	0	0.0661091	N/A	Yes	0.267671	0	Yes	4.89431	-5.28789	1.86517	-2.83507	0.00458159	0.050249	protein_coding	intronic	0	0	0	0	0	0	0	0	0	0	1	0	0	0
wt_saf_neg_peak_64529	chr16	57532099	57532521	-	423	4	27	27	10	3	5	0	3	Yes	0.107673	0.799635	0.811352	0.135716	0.0910646	0.155235	0	0.198327	N/A	Yes	0.572887	0.12315	Yes	12.2867	-1.93514	0.928798	-2.08349	0.037207	0.205273	protein_coding	intronic	0	0	0	0	0	0	0	0	0	0	0	0	0	0
wt_saf_neg_peak_64633	chr16	59582085	59582486	-	402	5	11	12	4	2	0	0	0	Yes	0.134592	0.325777	0.360601	0.0542865	0.0607097	0	0	0	N/A	Yes	0.273657	0.0303548	Yes	5.44883	-2.89612	1.42415	-2.03358	0.0419943	0.221852	protein_coding	intronic	0	0	0	0	0	0	0	0	0	0	0	0	0	0
wt_saf_neg_peak_64635	chr16	59586594	59587202	-	609	18	21	18	13	3	5	0	4	Yes	0.48453	0.621938	0.540901	0.176431	0.0910646	0.155235	0	0.264436	N/A	Yes	0.549123	0.12315	Yes	11.88	-1.88331	0.817813	-2.30287	0.0212864	0.141208	protein_coding	intronic	0	0	0	0	0	0	0	0	0	0	0	0	0	0
wt_saf_neg_peak_64767	chr16	64879792	64880298	-	507	11	8	9	3	0	0	0	2	Yes	0.296102	0.236929	0.270451	0.0407149	0	0	0	0.132218	N/A	Yes	0.267827	0	Yes	4.92122	-5.30131	1.75975	-3.01254	0.00259072	0.0330988	other	intronic	0	0	0	0	0	0	0	0	0	0	1	0	0	0
wt_saf_neg_peak_64770	chr16	65061420	65061540	-	121	1	15	17	3	0	0	0	0	Yes	0.0269183	0.444242	0.510851	0.0407149	0	0	0	0	N/A	Yes	0.327337	0	Yes	5.98272	-5.57792	1.82109	-3.06296	0.00219157	0.0291877	protein_coding	intronic	0	1	0	0	0	0	0	0	0	0	0	0	0	0
wt_saf_neg_peak_64783	chr16	66005941	66006023	-	83	16	8	8	2	2	1	0	0	Yes	0.430693	0.236929	0.2404	0.0271433	0.0607097	0.031047	0	0	N/A	Yes	0.302674	0.0458784	Yes	6.23856	-2.4603	1.21734	-2.02105	0.0432751	0.226284	other	intronic	0	0	0	0	0	0	0	0	0	0	1	0	0	0
wt_saf_neg_peak_64789	chr16	67485415	67485777	-	363	8	7	3	9	0	0	0	0	Yes	0.215347	0.207313	0.0901502	0.122145	0	0	0	0	N/A	No	0.170937	0	Yes	3.12348	-4.64849	1.93221	-2.40579	0.0161375	0.11821	protein_coding	intronic	0	0	0	0	0	0	0	0	0	0	0	0	0	0
wt_saf_neg_peak_64833	chr16	75754248	75754358	-	111	16	5	6	0	0	0	0	4	Yes	0.430693	0.148081	0.1803	0	0	0	0	0.264436	N/A	Yes	0.253025	0	Yes	4.66541	-5.22796	1.80545	-2.89565	0.00378375	0.0438062	other	intronic	0	0	0	0	0	0	0	0	0	0	0	0	0	0
wt_saf_neg_peak_64834	chr16	75754833	75755020	-	188	21	20	15	16	2	0	0	4	Yes	0.565285	0.592322	0.450751	0.217146	0.0607097	0	0	0.264436	N/A	Yes	0.536119	0.0303548	Yes	10.2559	-3.86556	1.24061	-3.11586	0.00183408	0.0255256	other	intronic	0	0	1	0	0	0	0	0	0	0	0	0	0	0
wt_saf_neg_peak_65009	chr16	85036878	85037139	-	262	10	12	6	4	0	1	0	2	Yes	0.269183	0.355393	0.1803	0.0542865	0	0.031047	0	0.132218	N/A	Yes	0.268292	0.0155235	Yes	5.12989	-3.84778	1.73384	-2.21922	0.0264715	0.163712	protein_coding	intronic	0	0	0	0	0	0	0	0	0	0	0	0	0	0
wt_saf_neg_peak_65012	chr16	85042171	85042823	-	653	22	40	29	33	4	15	0	4	Yes	0.592203	1.18464	0.871452	0.447864	0.121419	0.465706	0	0.264436	N/A	No	0.882767	0.293563	Yes	20.4969	-1.30403	0.654143	-1.99349	0.0462083	0.23564	protein_coding	intronic	0	0	0	1	0	0	0	0	0	0	0	1	0	0
wt_saf_neg_peak_65026	chr16	85091053	85091581	-	529	15	6	9	9	0	2	0	1	Yes	0.403775	0.177697	0.270451	0.122145	0	0.0620941	0	0.0661091	N/A	Yes	0.283974	0.031047	Yes	5.70284	-2.93484	1.39822	-2.09899	0.0358179	0.200263	protein_coding	intronic	0	0	0	0	0	0	0	0	0	0	0	0	0	0
wt_saf_neg_peak_65046	chr16	85147663	85147858	-	196	7	14	3	1	0	1	0	2	Yes	0.188428	0.414626	0.0901502	0.0135716	0	0.031047	0	0.132218	N/A	Yes	0.231068	0.0155235	Yes	4.42057	-3.62124	1.80787	-2.00304	0.0451726	0.232319	protein_coding	intronic	0	0	0	0	0	0	0	0	0	0	1	0	0	0
wt_saf_neg_peak_65177	chr16	89292313	89292488	-	176	1	16	9	4	0	0	0	1	Yes	0.0269183	0.473858	0.270451	0.0542865	0	0	0	0.0661091	N/A	Yes	0.257076	0	Yes	4.66185	-5.21969	1.88178	-2.7738	0.00554057	0.0574254	other	intronic	0	0	0	0	0	0	0	0	0	0	0	0	0	0
wt_saf_neg_peak_65179	chr16	89314564	89314741	-	178	9	3	5	0	0	0	0	3	Yes	0.242265	0.0888484	0.15025	0	0	0	0	0.198327	N/A	Yes	0.160455	0	Yes	2.96124	-4.57048	1.95988	-2.33202	0.0196998	0.134175	other	intronic	0	1	0	0	0	0	0	0	0	0	0	0	0	0
wt_saf_neg_peak_65518	chr16	91215960	91216655	-	696	5	15	11	6	1	2	0	0	Yes	0.134592	0.444242	0.330551	0.0814298	0.0303548	0.0620941	0	0	N/A	Yes	0.303128	0.0462245	Yes	6.21251	-2.43156	1.23683	-1.96595	0.0493041	0.24574	other	intronic	0	0	0	3	0	0	0	0	0	0	0	1	0	0
wt_saf_neg_peak_65531	chr16	91261236	91261418	-	183	6	9	9	10	0	1	0	1	Yes	0.16151	0.266545	0.270451	0.135716	0	0.031047	0	0.0661091	N/A	No	0.232835	0.0155235	Yes	4.49785	-3.64371	1.76805	-2.06086	0.0393161	0.21274	other	intronic	1	0	0	1	0	0	0	0	0	0	0	0	0	0
wt_saf_neg_peak_65623	chr16	91796826	91796974	-	149	6	7	1	0	0	0	0	3	Yes	0.16151	0.207313	0.0300501	0	0	0	0	0.198327	N/A	Yes	0.132958	0	Yes	2.4163	-4.27917	2.09252	-2.04498	0.0408565	NA	protein_coding	intronic	0	0	0	0	0	0	0	0	0	0	0	0	0	0
wt_saf_neg_peak_65638	chr16	92395079	92395173	-	95	7	23	11	8	0	3	0	0	Yes	0.188428	0.681171	0.330551	0.108573	0	0.0931411	0	0	N/A	Yes	0.40005	0.0465706	Yes	7.96572	-2.81673	1.20372	-2.34002	0.0192828	0.132376	protein_coding	intronic	0	0	0	0	0	0	0	0	0	0	0	0	0	0
wt_saf_neg_peak_65641	chr16	92398310	92398844	-	535	29	32	20	19	6	10	0	1	Yes	0.780632	0.947716	0.601001	0.257861	0.182129	0.31047	0	0.0661091	N/A	Yes	0.77645	0.2463	Yes	17.8438	-1.38145	0.648951	-2.12874	0.0332762	0.190748	protein_coding	intronic	0	0	0	0	0	0	0	0	0	0	1	0	0	0
wt_saf_neg_peak_65701	chr16	93793777	93794059	-	283	23	14	1	8	3	0	0	3	Yes	0.619122	0.414626	0.0300501	0.108573	0.0910646	0	0	0.198327	N/A	Yes	0.354599	0.0455323	Yes	7.13472	-2.69701	1.34029	-2.01226	0.0441929	0.229155	lncRNA	intronic	0	0	0	0	0	0	0	0	0	0	0	1	0	0
wt_saf_neg_peak_65718	chr16	94010966	94011198	-	233	15	29	15	27	2	6	0	0	Yes	0.403775	0.858867	0.450751	0.366434	0.0607097	0.186282	0	0	N/A	No	0.571131	0.123496	Yes	12.2394	-1.92629	0.846084	-2.27671	0.0228034	0.148	other	intronic	0	0	1	0	0	0	0	0	0	0	0	1	0	0
wt_saf_neg_peak_65752	chr16	94214717	94214865	-	149	12	17	7	8	3	1	0	1	Yes	0.32302	0.503474	0.21035	0.108573	0.0910646	0.031047	0	0.0661091	N/A	Yes	0.345615	0.0610558	Yes	7.18613	-2.22529	1.11085	-2.00322	0.0451535	0.232263	protein_coding	intronic	0	0	0	0	0	0	0	0	0	0	0	1	0	0
wt_saf_neg_peak_65812	chr16	94514851	94515010	-	160	17	5	13	1	2	0	0	0	Yes	0.457612	0.148081	0.390651	0.0135716	0.0607097	0	0	0	N/A	Yes	0.332114	0.0303548	Yes	6.57977	-3.19299	1.37797	-2.31717	0.0204942	0.137705	protein_coding	intronic	0	0	0	0	0	0	0	0	0	0	0	0	0	0
wt_saf_neg_peak_65821	chr16	94619329	94619595	-	267	17	9	6	0	0	2	0	0	Yes	0.457612	0.266545	0.1803	0	0	0.0620941	0	0	N/A	Yes	0.301486	0.031047	Yes	6.00184	-3.01749	1.38739	-2.17494	0.0296349	0.176697	other	intronic	0	0	0	0	0	0	0	0	0	0	0	0	0	0
wt_saf_neg_peak_65834	chr16	95448460	95448997	-	538	4	11	7	2	0	0	0	0	Yes	0.107673	0.325777	0.21035	0.0271433	0	0	0	0	N/A	Yes	0.2146	0	Yes	3.90862	-4.96662	1.85375	-2.67923	0.00737922	0.0701144	protein_coding	intronic	0	0	0	0	0	0	0	0	0	0	0	0	0	0
wt_saf_neg_peak_65838	chr16	95481572	95481698	-	127	2	6	5	0	0	0	0	2	Yes	0.0538367	0.177697	0.15025	0	0	0	0	0.132218	N/A	Yes	0.127261	0	Yes	2.32278	-4.21446	2.0794	-2.02677	0.0426857	NA	protein_coding	intronic	0	0	0	0	0	0	0	0	0	0	0	0	0	0
wt_saf_neg_peak_65925	chr16	97020196	97020495	-	300	8	9	12	1	0	0	0	0	Yes	0.215347	0.266545	0.360601	0.0135716	0	0	0	0	N/A	Yes	0.280831	0	Yes	5.15861	-5.36646	1.75145	-3.064	0.00218397	0.0291112	protein_coding	intronic	0	1	0	0	0	0	0	0	0	0	0	0	0	0
wt_saf_neg_peak_66054	chr17	3107078	3107261	-	184	18	15	16	41	1	2	0	0	Yes	0.48453	0.444242	0.480801	0.556437	0.0303548	0.0620941	0	0	N/A	No	0.469858	0.0462245	Yes	9.31264	-3.07891	1.09864	-2.80248	0.00507108	0.0539645	lncRNA	intronic	0	1	0	0	0	0	0	0	0	0	0	0	0	0
wt_saf_neg_peak_66064	chr17	3479463	3479849	-	387	5	6	9	0	0	0	0	2	Yes	0.134592	0.177697	0.270451	0	0	0	0	0.132218	N/A	Yes	0.194246	0	Yes	3.57064	-4.83482	1.8743	-2.57953	0.0098934	0.0857387	other	intronic	0	1	0	0	0	0	0	0	0	0	0	0	0	0
wt_saf_neg_peak_66123	chr17	5810334	5811017	-	684	11	10	9	7	1	1	0	3	Yes	0.296102	0.296161	0.270451	0.0950014	0.0303548	0.031047	0	0.198327	N/A	Yes	0.287571	0.030701	Yes	5.72534	-2.95853	1.36055	-2.17451	0.029667	0.176819	other	intronic	0	1	0	1	0	0	0	0	0	0	0	0	0	0
wt_saf_neg_peak_66125	chr17	5815770	5815855	-	86	9	2	7	0	0	0	0	0	Yes	0.242265	0.0592322	0.21035	0	0	0	0	0	N/A	Yes	0.170616	0	Yes	3.15966	-4.6622	1.95212	-2.38827	0.0169277	0.122055	other	intronic	0	0	0	0	0	0	0	0	0	0	0	0	0	0
wt_saf_neg_peak_66199	chr17	6413233	6413450	-	218	121	127	182	24	18	41	0	4	Yes	3.25712	3.76125	5.46911	0.325719	0.546387	1.27293	0	0.264436	N/A	Yes	4.16249	0.909658	Yes	90.0323	-1.9211	0.378075	-5.08127	3.74913e-07	1.90249e-05	other	intronic	0	0	1	0	0	0	0	0	0	0	1	0	0	0
wt_saf_neg_peak_66282	chr17	6798990	6799454	-	465	12	10	4	3	0	0	0	0	Yes	0.32302	0.296161	0.1202	0.0407149	0	0	0	0	N/A	Yes	0.24646	0	Yes	4.50382	-5.1768	1.80576	-2.86683	0.0041461	0.0467305	other	intronic	0	0	1	0	0	0	0	0	0	0	0	1	0	0
wt_saf_neg_peak_66293	chr17	6923383	6923811	-	429	16	4	6	7	0	1	0	4	Yes	0.430693	0.118465	0.1803	0.0950014	0	0.031047	0	0.264436	N/A	No	0.243153	0.0155235	Yes	4.72318	-3.72439	1.78612	-2.08519	0.0370522	0.204693	protein_coding	intronic	0	0	0	1	0	0	0	0	0	0	0	0	0	0
wt_saf_neg_peak_66295	chr17	6924619	6924746	-	128	2	5	8	0	0	0	0	1	Yes	0.0538367	0.148081	0.2404	0	0	0	0	0.0661091	N/A	Yes	0.147439	0	Yes	2.70828	-4.4337	2.01866	-2.19636	0.028066	NA	protein_coding	intronic	0	0	0	1	0	0	0	0	0	0	0	0	0	0
wt_saf_neg_peak_66296	chr17	6929955	6930334	-	380	25	7	11	10	0	1	0	4	Yes	0.672958	0.207313	0.330551	0.135716	0	0.031047	0	0.264436	N/A	Yes	0.403607	0.0155235	Yes	7.68441	-4.45619	1.6683	-2.67109	0.00756047	0.0713445	protein_coding	intronic	0	1	0	0	0	0	0	0	0	0	0	0	0	0
wt_saf_neg_peak_66346	chr17	10196302	10196520	-	219	15	12	11	1	2	1	0	2	Yes	0.403775	0.355393	0.330551	0.0135716	0.0607097	0.031047	0	0.132218	N/A	Yes	0.36324	0.0458784	Yes	7.33618	-2.71717	1.15817	-2.34609	0.0189715	0.13107	other	intronic	0	0	0	0	0	0	0	0	0	0	0	1	0	0
wt_saf_neg_peak_66413	chr17	10334394	10334982	-	589	8	14	8	1	2	0	0	2	Yes	0.215347	0.414626	0.2404	0.0135716	0.0607097	0	0	0.132218	N/A	Yes	0.290124	0.0303548	Yes	5.72728	-2.97693	1.39476	-2.13437	0.0328125	0.188944	other	intronic	0	0	0	0	0	0	0	0	0	0	0	0	0	0
wt_saf_neg_peak_66435	chr17	12214005	12214381	-	377	14	16	6	0	1	3	0	4	Yes	0.376857	0.473858	0.1803	0	0.0303548	0.0931411	0	0.264436	N/A	Yes	0.343672	0.061748	Yes	7.18504	-2.19988	1.11476	-1.97342	0.0484479	0.242986	other	intronic	0	0	0	0	0	0	0	0	0	0	0	0	0	0
wt_saf_neg_peak_66436	chr17	12216386	12216896	-	511	18	15	8	0	2	1	1	2	Yes	0.48453	0.444242	0.2404	0	0.0607097	0.031047	0.0696843	0.132218	N/A	Yes	0.389724	0.0458784	Yes	7.80171	-2.81676	1.15571	-2.43726	0.0147992	0.111787	other	intronic	0	0	0	0	0	0	0	0	0	0	0	0	0	0
wt_saf_neg_peak_66610	chr17	13515325	13515734	-	410	11	15	6	7	3	0	0	2	Yes	0.296102	0.444242	0.1803	0.0950014	0.0910646	0	0	0.132218	N/A	Yes	0.306881	0.0455323	Yes	6.24758	-2.47805	1.25497	-1.97458	0.0483157	0.242525	lncRNA	intronic	0	0	0	0	0	0	0	0	0	0	0	0	0	0
wt_saf_neg_peak_66611	chr17	13516323	13516659	-	337	5	8	8	7	0	0	0	0	Yes	0.134592	0.236929	0.2404	0.0950014	0	0	0	0	N/A	Yes	0.203974	0	Yes	3.73502	-4.90067	1.85483	-2.64211	0.0082391	0.0757386	lncRNA	intronic	0	0	0	0	0	0	0	0	0	0	0	1	0	0
wt_saf_neg_peak_66615	chr17	13533389	13533794	-	406	8	6	4	1	0	0	0	3	Yes	0.215347	0.177697	0.1202	0.0135716	0	0	0	0.198327	N/A	Yes	0.171081	0	Yes	3.13483	-4.65289	1.92078	-2.42239	0.0154186	0.114712	lncRNA	intronic	0	1	0	0	0	0	0	0	0	0	0	0	0	0
wt_saf_neg_peak_66627	chr17	13662868	13663017	-	150	12	7	5	1	1	0	0	0	Yes	0.32302	0.207313	0.15025	0.0135716	0.0303548	0	0	0	N/A	Yes	0.226861	0.0151774	Yes	4.38287	-3.6257	1.78337	-2.03307	0.0420459	0.222043	lncRNA	intronic	0	0	0	0	0	0	0	0	0	0	0	0	0	0
wt_saf_neg_peak_66643	chr17	13691981	13692608	-	628	23	19	17	20	5	2	0	1	Yes	0.619122	0.562706	0.510851	0.271433	0.151774	0.0620941	0	0.0661091	N/A	Yes	0.564226	0.106934	Yes	11.9119	-2.1329	0.844766	-2.52484	0.011575	0.0952428	lncRNA	intronic	0	0	0	0	0	0	0	0	0	0	0	0	0	0
wt_saf_neg_peak_66648	chr17	13699302	13700014	-	713	32	33	16	16	6	1	0	4	Yes	0.861387	0.977332	0.480801	0.217146	0.182129	0.031047	0	0.264436	N/A	Yes	0.773173	0.106588	Yes	15.6693	-2.5875	0.820123	-3.15502	0.00160488	0.0230793	lncRNA	intronic	0	0	0	0	0	0	0	0	0	0	0	0	0	0
wt_saf_neg_peak_66655	chr17	13718980	13719224	-	245	17	9	5	20	2	0	0	3	Yes	0.457612	0.266545	0.15025	0.271433	0.0607097	0	0	0.198327	N/A	No	0.291469	0.0303548	Yes	5.78609	-2.99852	1.41115	-2.12487	0.0335971	0.192049	protein_coding	intronic	0	0	0	0	0	0	0	0	0	0	0	0	0	0
wt_saf_neg_peak_66660	chr17	13740720	13742111	-	1392	19	39	22	51	11	5	0	4	Yes	0.511448	1.15503	0.661101	0.692153	0.333903	0.155235	0	0.264436	N/A	No	0.775859	0.244569	Yes	17.7112	-1.38935	0.678592	-2.0474	0.040619	0.217125	protein_coding	intronic	0	0	0	0	0	0	0	0	0	0	0	0	0	0
wt_saf_neg_peak_66666	chr17	13756532	13756760	-	229	13	26	11	17	0	4	0	0	Yes	0.349938	0.770019	0.330551	0.230718	0	0.124188	0	0	N/A	No	0.483503	0.0620941	Yes	9.72552	-2.67754	1.0659	-2.512	0.012005	0.0976167	protein_coding	intronic	0	0	0	0	0	0	0	0	0	0	0	1	0	0
wt_saf_neg_peak_66716	chr17	15053878	15054036	-	159	11	18	8	10	3	1	0	2	Yes	0.296102	0.53309	0.2404	0.135716	0.0910646	0.031047	0	0.132218	N/A	Yes	0.356531	0.0610558	Yes	7.38242	-2.26857	1.10226	-2.05811	0.0395791	0.213697	other	intronic	0	0	0	1	0	0	0	0	0	0	0	0	0	0
wt_saf_neg_peak_66730	chr17	15447548	15447644	-	97	3	5	6	0	0	0	0	3	Yes	0.080755	0.148081	0.1803	0	0	0	0	0.198327	N/A	Yes	0.136379	0	Yes	2.50065	-4.32084	2.02813	-2.13045	0.0331342	NA	other	intronic	0	0	0	0	0	0	0	0	0	0	1	0	0	0
wt_saf_neg_peak_66766	chr17	15684022	15684121	-	100	5	8	3	6	0	0	0	3	Yes	0.134592	0.236929	0.0901502	0.0814298	0	0	0	0.198327	N/A	No	0.15389	0	Yes	2.79965	-4.48871	1.98011	-2.26691	0.023396	NA	other	intronic	0	0	1	0	0	0	0	0	0	0	0	1	0	0
wt_saf_neg_peak_66767	chr17	15696460	15696782	-	323	1	14	6	4	0	0	0	4	Yes	0.0269183	0.414626	0.1803	0.0542865	0	0	0	0.264436	N/A	Yes	0.207281	0	Yes	3.74917	-4.90603	1.94921	-2.51693	0.0118382	0.09674	other	intronic	0	1	0	1	0	0	0	0	0	0	0	1	0	0
[truncated: 29,427 more rows]
[truncated: 2 more columns]

## Sheet: Sheet_Legend
Column	Description
A	SAFB Peak designation - neg negative strand, pos positive strand, associated peak number
B	SAFB Peak Chromosome Location
[truncated: 50 more rows]
