# Supplementary material
Source: HighWire-hosted journal article supplement (doi:10.1101/rna.079569.122)
Supplement: Supplemental_Table_S2.xlsx [file Supplemental_Table_S2.xlsx]

## Sheet: Sheet1
Transposable.Element	Location	dko13_total	dko4_total	wt20_total	wt44_total	wtrmce_total	dko13_rip	dko4_rip	wt20_rip	wt44_rip	wtrmce_rip	Overlaps.genes	gt2_wt_vdko
B1_Mus1_dup22393:B1_Mus1:Alu:SINE	chr4:146188489-146188627	0	0	0.396098	0	0.84955	0	0	0	0.691152	0	TRUE	0
B1_Mus1_dup39665:B1_Mus1:Alu:SINE	chr8:33357119-33357256	0	0.356497	0	0	0.33982	0	0	0.53309	0.1202	0.619122	TRUE	0
B1_Mus1_dup84622:B1_Mus1:Alu:SINE	chr16:40406113-40406225	0.105152	0.427797	0.264065	0	0.084955	0	0	0.148081	0	0.16151	TRUE	0
B1_Mus2_dup28640:B1_Mus2:Alu:SINE	chr7:102048500-102048645	0.105152	0.213898	0	0	0	0	0	1.21426	0.931552	0.134592	TRUE	0
B2_Mm1a_dup102:B2_Mm1a:B2:SINE	chr1:34029732-34029925	0	0.285198	0	0	0.594685	0	0	0.148081	0	0	TRUE	0
B2_Mm1a_dup10865:B2_Mm1a:B2:SINE	chr10:77490785-77490978	0	1.42599	0	0	0	0	0	0.681171	0	0.349938	TRUE	0
B2_Mm1a_dup11439:B2_Mm1a:B2:SINE	chr11:23373460-23373616	0	0.142599	0.396098	0	1.10441	0	0	0	0.270451	0	TRUE	0
B2_Mm1a_dup11893:B2_Mm1a:B2:SINE	chr11:75114033-75114191	0	0.0712994	0	0	1.27432	0	0	0	0.0300501	0	TRUE	0
B2_Mm1a_dup12178:B2_Mm1a:B2:SINE	chr11:87452724-87452915	0	0.641695	0	0.416504	0	0	0	0	0.0601001	0.349938	TRUE	0
B2_Mm1a_dup12562:B2_Mm1a:B2:SINE	chr11:107064352-107064542	0	0	0.264065	0	0	0	0	1.15503	0.0300501	0	TRUE	0
B2_Mm1a_dup13710:B2_Mm1a:B2:SINE	chr13:12282018-12282211	0	0	0	0	0	0	0	1.21426	0.0300501	0	TRUE	0
B2_Mm1a_dup13929:B2_Mm1a:B2:SINE	chr13:55424200-55424391	0	0	0	1.04126	0	0	0	0	0.330551	0.349938	TRUE	0
B2_Mm1a_dup13948:B2_Mm1a:B2:SINE	chr13:55789106-55789296	0	1.06949	0.528131	0.555338	0	0	0	0.0296161	0.21035	0	TRUE	0
B2_Mm1a_dup14268:B2_Mm1a:B2:SINE	chr13:111595424-111595616	1.36698	0	0	0	0	0	0	0	0.1202	0	TRUE	0
B2_Mm1a_dup1481:B2_Mm1a:B2:SINE	chr2:62358195-62358383	0.420609	0.0712994	1.05626	0.76359	1.01946	0	0	0.325777	0.1202	0	TRUE	0
B2_Mm1a_dup14883:B2_Mm1a:B2:SINE	chr14:93731899-93732082	0.420609	0.285198	0.330082	0.416504	0	0	0	0	0	0.242265	TRUE	0
B2_Mm1a_dup14979:B2_Mm1a:B2:SINE	chr15:8033811-8033969	0	0.427797	0.0660164	0.416504	0.764595	0	0	0	0.240401	0	TRUE	0
B2_Mm1a_dup15124:B2_Mm1a:B2:SINE	chr15:51976624-51976782	0	0	0.0660164	0.416504	0.764595	0	0	0	0.240401	0	TRUE	0
B2_Mm1a_dup15392:B2_Mm1a:B2:SINE	chr15:82011717-82011904	0.157728	0.142599	0	0.485921	0.50973	0	0	0.207313	0	0.242265	TRUE	0
B2_Mm1a_dup16488:B2_Mm1a:B2:SINE	chr17:26170471-26170657	0.262881	0.285198	0.660164	0.694173	0	0	0	0	0	0.215347	TRUE	0
B2_Mm1a_dup16916:B2_Mm1a:B2:SINE	chr17:63097534-63097727	0.315457	0.427797	0	0	0.84955	0	0	0	0.360601	0.242265	TRUE	0
B2_Mm1a_dup17846:B2_Mm1a:B2:SINE	chr19:8716689-8716848	0.210305	0	0.132033	0.138835	1.78405	0	0	0.207313	0.510851	0.16151	TRUE	0
B2_Mm1a_dup17849:B2_Mm1a:B2:SINE	chr19:8736552-8736741	0	0	0.396098	0.694173	0	0	0	0.207313	0	0	TRUE	0
B2_Mm1a_dup2128:B2_Mm1a:B2:SINE	chr2:156102298-156102486	1.05152	0	0.198049	0	0	0	0	0.236929	0	0.242265	TRUE	0
B2_Mm1a_dup2143:B2_Mm1a:B2:SINE	chr2:156320930-156321121	0	0.427797	0	0.347086	0	0	0	0.325777	0	0	TRUE	0
B2_Mm1a_dup2295:B2_Mm1a:B2:SINE	chr2:167832189-167832380	0	0	0	0.277669	0.934505	0	0	0	0	0.565285	TRUE	0
B2_Mm1a_dup2875:B2_Mm1a:B2:SINE	chr3:96838905-96839096	0	0.285198	0	0.694173	1.10441	0	0	0	0.0300501	0	TRUE	0
B2_Mm1a_dup4586:B2_Mm1a:B2:SINE	chr4:156038793-156038981	0.315457	0.285198	0.330082	0	0.254865	0	0	0.414626	0	0	TRUE	0
B2_Mm1a_dup4939:B2_Mm1a:B2:SINE	chr5:72238448-72238635	0.210305	0	0	0.485921	0.594685	0	0	0.0296161	0.0901502	0	TRUE	0
B2_Mm1a_dup5491:B2_Mm1a:B2:SINE	chr5:129890383-129890571	0.525761	0.499096	0.198049	0	0	0	0	0.977332	0.1803	0.134592	TRUE	0
B2_Mm1a_dup5950:B2_Mm1a:B2:SINE	chr6:38606144-38606334	0.998947	0.142599	0	0	0	0	0	0.207313	0	0.134592	TRUE	0
B2_Mm1a_dup6114:B2_Mm1a:B2:SINE	chr6:67182873-67183058	0	0.427797	0.660164	0	0.084955	0	0	0	0.0300501	0.16151	TRUE	0
B2_Mm1a_dup657:B2_Mm1a:B2:SINE	chr1:135526492-135526682	0	0	0.198049	0	0.254865	0	0	0.770019	0	0.16151	TRUE	0
B2_Mm1a_dup6978:B2_Mm1a:B2:SINE	chr7:34164126-34164320	0	0.712994	0	1.11068	0	0	0	0	0.0601001	0	TRUE	0
B2_Mm1a_dup7047:B2_Mm1a:B2:SINE	chr7:42052817-42052976	0	0	0	0	0	0	0	1.21426	0	0	TRUE	0
B2_Mm1a_dup7303:B2_Mm1a:B2:SINE	chr7:81431867-81432061	0	0.641695	0	0	0.50973	0	0	0.118464	0	0.134592	TRUE	0
B2_Mm1a_dup7627:B2_Mm1a:B2:SINE	chr7:127453789-127453981	0.578338	0	0	0	0	0	0	0.799635	0.0901502	0.080755	TRUE	0
B2_Mm1a_dup767:B2_Mm1a:B2:SINE	chr1:156597480-156597679	0	0.998192	0.132033	0	0.254865	0	0	0	0.0901502	0	TRUE	0
B2_Mm1a_dup8276:B2_Mm1a:B2:SINE	chr8:87919911-87920098	0	0.142599	0	0	2.03892	0	0	0.829251	0.420701	0	TRUE	0
B2_Mm1a_dup8473:B2_Mm1a:B2:SINE	chr8:110953335-110953526	0	0.356497	0	0	0.50973	0	0	0.503474	0.1803	0	TRUE	0
B2_Mm1a_dup8657:B2_Mm1a:B2:SINE	chr8:129171544-129171702	0	0	0.0660164	0.416504	0.764595	0	0	0	0.240401	0	TRUE	0
B2_Mm1a_dup8842:B2_Mm1a:B2:SINE	chr9:32213055-32213243	0.630914	0.213898	0.462115	0	0.084955	0	0	0	0	0.080755	TRUE	0
B2_Mm1a_dup9515:B2_Mm1a:B2:SINE	chr9:108255864-108256057	0.893795	0.499096	0	0	0	0	0	0	0.0300501	0	TRUE	0
B2_Mm1a_dup9804:B2_Mm1a:B2:SINE	chrX:20204900-20205062	1.41956	1.71119	0.132033	1.04126	1.6991	0	0	0	0.0300501	0	TRUE	0
B2_Mm1a_dup9810:B2_Mm1a:B2:SINE	chrX:20457596-20457781	0	0.0712994	0.132033	0.138835	0.33982	0	0	1.12541	0.330551	0.48453	TRUE	0
B2_Mm1t_dup10685:B2_Mm1t:B2:SINE	chr8:106652432-106652622	0	0.356497	0	0.347086	0	0	0	0.473858	0	0	TRUE	0
B2_Mm1t_dup13205:B2_Mm1t:B2:SINE	chrX:153364999-153365185	0	0.213898	0	0	0.67964	0	0	0.266545	0	0	TRUE	0
B2_Mm1t_dup13767:B2_Mm1t:B2:SINE	chr10:43547495-43547680	0.946371	0	0	0.347086	0	0	0	0	0.0901502	0	TRUE	0
B2_Mm1t_dup15018:B2_Mm1t:B2:SINE	chr11:51702350-51702540	0	0.926892	0	0	0	0	0	0.799635	0.0300501	0.0538367	TRUE	0
B2_Mm1t_dup15156:B2_Mm1t:B2:SINE	chr11:59981924-59982111	0	1.14079	0	1.11068	0	0	0	0	0.721202	0	TRUE	0
B2_Mm1t_dup15436:B2_Mm1t:B2:SINE	chr11:77401638-77401824	0	0	0	1.38835	0	0	0	0	0.0601001	0	TRUE	0
B2_Mm1t_dup1646:B2_Mm1t:B2:SINE	chr2:29708911-29709103	0	0.0712994	0	0	0	0	0	1.39196	0.0300501	0	TRUE	0
B2_Mm1t_dup17335:B2_Mm1t:B2:SINE	chr12:110644921-110645112	0	1.42599	0	0	0	0	0	0.148081	0.1803	0	TRUE	0
B2_Mm1t_dup17664:B2_Mm1t:B2:SINE	chr13:41054566-41054751	0.368033	0	0.198049	0.208252	0.424775	0	0	0	0.240401	0.134592	TRUE	0
B2_Mm1t_dup18957:B2_Mm1t:B2:SINE	chr14:63337003-63337192	0.315457	0.855593	0.594147	1.11068	0.50973	0	0	0	0.570951	0.349938	TRUE	0
B2_Mm1t_dup1969:B2_Mm1t:B2:SINE	chr2:69921618-69921810	1.26183	0.0712994	0	0	0	0	0	0	1.6227	0	TRUE	0
B2_Mm1t_dup19721:B2_Mm1t:B2:SINE	chr15:79596001-79596191	0.893795	0	0.594147	0	0	0	0	0	0.510851	0	TRUE	0
B2_Mm1t_dup19801:B2_Mm1t:B2:SINE	chr15:82173709-82173906	0.788642	0.356497	0	0	0	0	0	0	0.961602	0	TRUE	0
B2_Mm1t_dup19960:B2_Mm1t:B2:SINE	chr15:94305266-94305450	1.1041	0	0	0	0	0	0	0	0.15025	0.215347	TRUE	0
B2_Mm1t_dup19976:B2_Mm1t:B2:SINE	chr15:96596163-96596321	0	0	0.330082	0	0.33982	0	0	0.562706	0.0300501	0	TRUE	0
B2_Mm1t_dup20168:B2_Mm1t:B2:SINE	chr16:4688788-4688976	0	0	0	0	0	0	0	1.00695	0	0	TRUE	0
B2_Mm1t_dup2838:B2_Mm1t:B2:SINE	chr2:155669239-155669431	0	0.427797	0	0.694173	0.594685	0	0	0.236929	0.0901502	0.64604	TRUE	0
B2_Mm1t_dup3848:B2_Mm1t:B2:SINE	chr3:95858498-95858670	0.525761	0.213898	0.264065	0.138835	0	0	0	0.266545	0.1803	0.80755	TRUE	0
B2_Mm1t_dup5117:B2_Mm1t:B2:SINE	chr4:120519345-120519528	0.0525761	0	0	0	0.67964	0	0	0.473858	0.1202	0	TRUE	0
B2_Mm1t_dup5463:B2_Mm1t:B2:SINE	chr4:134008878-134009068	0.473185	0.356497	0	0	0.254865	0	0	0	0	0.16151	TRUE	0
B2_Mm1t_dup5749:B2_Mm1t:B2:SINE	chr4:147914119-147914308	0	0.499096	0.132033	0	0.33982	0	0	0.325777	0.360601	0.215347	TRUE	0
B2_Mm1t_dup5757:B2_Mm1t:B2:SINE	chr4:148116312-148116488	0.420609	0	0	0.347086	0.424775	0	0	0	0	0.242265	TRUE	0
B2_Mm1t_dup7959:B2_Mm1t:B2:SINE	chr6:85626067-85626259	0	0.285198	0	0	0	0	0	0.740403	0.15025	0	TRUE	0
B2_Mm1t_dup8283:B2_Mm1t:B2:SINE	chr6:125158311-125158503	0.157728	0.356497	0.396098	0.624756	0.50973	0	0	0	0.300501	0.511448	TRUE	0
B2_Mm2_dup20620:B2_Mm2:B2:SINE	chr4:135390692-135390842	0	0.213898	0.0660164	0	0.424775	0	0	0.385009	0.0601001	0	TRUE	0
B2_Mm2_dup26125:B2_Mm2:B2:SINE	chr5:118714343-118714532	0.368033	0.142599	0.198049	0.138835	0	0	0	0.325777	0.15025	0.16151	TRUE	0
B2_Mm2_dup28166:B2_Mm2:B2:SINE	chr5:147621797-147621973	0	0.427797	0.0660164	0	0.424775	0	0	0.148081	0.1202	0.215347	TRUE	0
B2_Mm2_dup44331:B2_Mm2:B2:SINE	chr9:60872525-60872709	0.630914	0	0.660164	0	0.16991	0	0	0	0.450751	0	TRUE	0
B2_Mm2_dup4518:B2_Mm2:B2:SINE	chr1:165148950-165149107	0.368033	0.0712994	0	0.138835	0.67964	0	0	0.977332	0.270451	1.15749	TRUE	0
B4A_dup86005:B4A:B4:SINE	chr14:6070694-6070815	0	0	0	0	0	0	0	1.27349	0.0601001	0	TRUE	0
ETnERV-int_dup824:ETnERV-int:ERVK:LTR	chr17:32369739-32370094	0	1.63989	0	0	0	0	0	0	2.52421	0	TRUE	0
ETnERV2-int_dup1320:ETnERV2-int:ERVK:LTR	chr10:7613264-7614795	0.157728	0.0712994	0.462115	0.347086	0	0	0	0	0.0901502	0	TRUE	0
IAPEY3-int_dup232:IAPEY3-int:ERVK:LTR	chr4:6000064-6000163	0.262881	0.213898	0.462115	0	0	0	0	0.325777	0	0.188428	TRUE	0
IAPEY4_I-int_dup23:IAPEY4_I-int:ERVK:LTR	chr1:118014808-118019825	0.525761	0.427797	0	0.902425	0.67964	0	0	0	0	0.48453	TRUE	0
IAPEz-int_dup1206:IAPEz-int:ERVK:LTR	chr3:51240387-51241612	0.525761	0.213898	0	1.87427	2.71856	0	0	2.60622	2.49416	4.38769	TRUE	0
IAPEz-int_dup1207:IAPEz-int:ERVK:LTR	chr3:51241611-51244882	0.262881	0	0	1.11068	0	0	0	0	0.21035	0.64604	TRUE	0
IAPEz-int_dup1708:IAPEz-int:ERVK:LTR	chr4:100933470-100934350	0.315457	0.427797	0	0.277669	0	0	0	0	0.330551	0.16151	TRUE	0
IAPEz-int_dup1800:IAPEz-int:ERVK:LTR	chr4:147833853-147840309	0	0.427797	0.330082	0	0.424775	0	0	0.355393	0.540901	0	TRUE	0
IAPEz-int_dup2041:IAPEz-int:ERVK:LTR	chr5:60807312-60808640	0	0.855593	0.330082	0	0.50973	0	0	1.12541	0.781302	0.430693	TRUE	0
IAPEz-int_dup321:IAPEz-int:ERVK:LTR	chr1:97173040-97175788	0	0.285198	0	0	0	0	0	1.03656	1.0818	1.07673	TRUE	0
IAPEz-int_dup3901:IAPEz-int:ERVK:LTR	chrX:72942305-72948752	0.68349	0.427797	0	0	0	0	0	0	0.0601001	0	TRUE	0
IAPEz-int_dup4175:IAPEz-int:ERVK:LTR	chrX:137963945-137965623	0	0.0712994	0.990246	0	0.594685	0	0	0	0.300501	0	TRUE	0
IAPEz-int_dup4973:IAPEz-int:ERVK:LTR	chr11:106028617-106031883	0	0.998192	1.05626	0	1.10441	0	0	0.325777	0	0.107673	TRUE	0
IAPEz-int_dup4974:IAPEz-int:ERVK:LTR	chr11:106031882-106033193	3.78548	2.92328	1.71643	3.6097	4.16279	0	0	3.4947	1.47245	1.48051	TRUE	0
IAPEz-int_dup5462:IAPEz-int:ERVK:LTR	chr13:43277898-43284297	0	0	0.660164	0	0	0	0	0.947716	0	0.619122	TRUE	0
IAPEz-int_dup980:IAPEz-int:ERVK:LTR	chr2:156117862-156118123	0	0	0.528131	0.555338	0	0	0	0	0	0.672958	TRUE	0
IAPLTR1_Mm_dup161:IAPLTR1_Mm:ERVK:LTR	chr2:84510087-84510421	0.473185	0.499096	0	0.277669	1.52919	0	0	0.503474	0.330551	0.376857	TRUE	0
IAPLTR1_Mm_dup532:IAPLTR1_Mm:ERVK:LTR	chr6:96152773-96153121	0	0.213898	0.132033	0.347086	0	0	0	0.385009	0.1202	0	TRUE	0
L1Md_A_dup12706:L1Md_A:L1:LINE	chr12:37362938-37368228	0.473185	0	0.396098	0.694173	0	0	0	0	0.420701	0.64604	TRUE	0
L1Md_A_dup13555:L1Md_A:L1:LINE	chr13:83180725-83187329	0	0.142599	0.924229	0	0	0	0	0	0	0.296102	TRUE	0
L1Md_A_dup16216:L1Md_A:L1:LINE	chr18:25213816-25219005	0.262881	1.06949	0.792196	0	0.764595	0	0	0	0.0300501	0	TRUE	0
L1Md_A_dup16298:L1Md_A:L1:LINE	chr18:43889500-43894063	0	0.427797	0.330082	0.555338	0	0	0	0.0592322	0.240401	0.080755	TRUE	0
L1Md_A_dup163:L1Md_A:L1:LINE	chr1:20096305-20102498	0	0.0712994	0	0.971842	0.16991	0	0	0	0.631051	0.242265	TRUE	0
L1Md_A_dup370:L1Md_A:L1:LINE	chr1:45972646-45975747	0.157728	0.855593	0	0.138835	0	0	0	0	0.0601001	0	TRUE	0
L1Md_A_dup5330:L1Md_A:L1:LINE	chr6:40716589-40723009	0	0	0.132033	0.76359	0	0	0	0.385009	0.631051	0.215347	TRUE	0
L1Md_A_dup578:L1Md_A:L1:LINE	chr1:79039256-79045456	0	0.356497	0.462115	0.416504	0	0	0	0.325777	0.841402	0.107673	TRUE	0
L1Md_A_dup9713:L1Md_A:L1:LINE	chrX:155729871-155730985	0.368033	0.0712994	0.462115	0.485921	0	0	0	0.0296161	0.300501	0.0538367	TRUE	0
L1Md_F2_dup11722:L1Md_F2:L1:LINE	chr3:93338279-93339178	0.210305	0	0.330082	0	0.16991	0	0	1.98428	1.65275	1.39975	TRUE	0
L1Md_F2_dup12016:L1Md_F2:L1:LINE	chr3:109457379-109461660	0.210305	0.641695	0.264065	0.555338	0	0	0	0	0.1202	0.215347	TRUE	0
L1Md_F2_dup12326:L1Md_F2:L1:LINE	chr3:117529338-117535499	0	0	0.330082	0.624756	0.254865	0	0	0	0.631051	0	TRUE	0
L1Md_F2_dup12541:L1Md_F2:L1:LINE	chr3:125634726-125635716	0.315457	0	0	0.485921	0.084955	0	0	1.59927	0.540901	1.13057	TRUE	0
L1Md_F2_dup15013:L1Md_F2:L1:LINE	chr4:60000521-60001511	0.157728	0.213898	0	0.277669	0	0	0	0.651555	1.41235	0.403775	TRUE	0
L1Md_F2_dup16224:L1Md_F2:L1:LINE	chr4:94596394-94597407	0.157728	0.0712994	0.462115	0.277669	0	0	0	0.799635	1.35225	2.12655	TRUE	0
L1Md_F2_dup16587:L1Md_F2:L1:LINE	chr4:113963706-113969006	0	0.712994	0	0	0.254865	0	0	0.0592322	0.390651	0	TRUE	0
L1Md_F2_dup16768:L1Md_F2:L1:LINE	chr4:122860392-122861174	0	0	0	0	0.254865	0	0	1.45119	1.7429	1.13057	TRUE	0
L1Md_F2_dup17736:L1Md_F2:L1:LINE	chr5:34450680-34451670	0	0	0	0.347086	0	0	0	1.68812	1.59265	0.430693	TRUE	0
L1Md_F2_dup19931:L1Md_F2:L1:LINE	chr5:109786704-109787951	0.210305	0	0.132033	0	0	0	0	0.888483	0.420701	0.16151	TRUE	0
L1Md_F2_dup21656:L1Md_F2:L1:LINE	chr6:56460635-56466628	0.315457	0.0712994	0	1.38835	0.16991	0	0	0	0.480801	0.296102	TRUE	0
L1Md_F2_dup22689:L1Md_F2:L1:LINE	chr6:85657154-85662332	0	0.213898	0.528131	0	0	0	0	0.473858	0.601001	0	TRUE	0
L1Md_F2_dup23981:L1Md_F2:L1:LINE	chr7:6942368-6948055	0.210305	0	0	0	0.594685	0	0	0.503474	1.3823	0.699877	TRUE	0
L1Md_F2_dup25843:L1Md_F2:L1:LINE	chr7:59996378-59997060	0.105152	0.427797	0	0.76359	0	0	0	0	0.0901502	0.107673	TRUE	0
L1Md_F2_dup26353:L1Md_F2:L1:LINE	chr7:81667727-81669285	0	0	0	0	0	0	0	1.74735	1.35225	0.915223	TRUE	0
L1Md_F2_dup26826:L1Md_F2:L1:LINE	chr7:97021244-97022081	0	0.285198	0	0.0694173	0.16991	0	0	0.770019	0.15025	0.64604	TRUE	0
L1Md_F2_dup31410:L1Md_F2:L1:LINE	chr9:55638660-55644622	0	0.213898	0	0.902425	0	0	0	0	0.0300501	0	TRUE	0
L1Md_F2_dup39641:L1Md_F2:L1:LINE	chrX:154110908-154115992	0.525761	0	0.594147	1.11068	0	0	0	0.148081	0	0.726795	TRUE	0
L1Md_F2_dup46237:L1Md_F2:L1:LINE	chr11:83088970-83095208	0	0.213898	0	0.485921	0.424775	0	0	0	0.450751	0	TRUE	0
L1Md_F2_dup46254:L1Md_F2:L1:LINE	chr11:85046415-85049408	0.630914	0.712994	0	0.138835	0.33982	0	0	0.740403	1.29215	0.699877	TRUE	0
L1Md_F2_dup46556:L1Md_F2:L1:LINE	chr12:35126823-35129549	0	0	0.0660164	0.624756	0	0	0	0.562706	1.2621	0.376857	TRUE	0
L1Md_F2_dup5057:L1Md_F2:L1:LINE	chr2:91356182-91357339	0	0.0712994	0	0	0	0	0	1.21426	0.691152	0.403775	TRUE	0
L1Md_F2_dup50625:L1Md_F2:L1:LINE	chr13:59325851-59326520	0	0	0	0.555338	0	0	0	0.740403	0	0.134592	TRUE	0
L1Md_F2_dup51454:L1Md_F2:L1:LINE	chr13:100471064-100472425	0	0.213898	0	0	0	0	0	1.03656	1.4424	1.39975	TRUE	0
L1Md_F2_dup56218:L1Md_F2:L1:LINE	chr15:39382084-39387250	0	0.213898	0.594147	0	0.594685	0	0	0	1.0818	0.80755	TRUE	0
L1Md_F2_dup57795:L1Md_F2:L1:LINE	chr16:16429210-16435351	0.262881	0	0	0.76359	0	0	0	0.0888483	0.510851	0	TRUE	0
L1Md_F2_dup7565:L1Md_F2:L1:LINE	chr2:108210823-108212536	0	0.142599	0.264065	0.208252	0.424775	0	0	0.0592322	0.631051	0.107673	TRUE	0
L1Md_F2_dup7801:L1Md_F2:L1:LINE	chr2:114549472-114555780	0	0.427797	0.462115	0.416504	0.67964	0	0	0	0.0601001	0	TRUE	0
L1Md_F2_dup8542:L1Md_F2:L1:LINE	chr2:155148334-155151981	0.210305	0	0.462115	0.555338	0.84955	0	0	0	0.631051	0.672958	TRUE	0
L1Md_F3_dup11375:L1Md_F3:L1:LINE	chr10:119598884-119599642	0	0	0.660164	0.416504	0	0	0	1.48081	0.751252	0.619122	TRUE	0
L1Md_F3_dup11634:L1Md_F3:L1:LINE	chr11:49023084-49028508	0	0.499096	0	0	0	0	0	1.00695	1.53255	0.834468	TRUE	0
L1Md_F3_dup11880:L1Md_F3:L1:LINE	chr12:18041717-18046941	0.525761	0	0.792196	0	0.50973	0	0	0	0.901502	0	TRUE	0
L1Md_F3_dup12585:L1Md_F3:L1:LINE	chr13:29341929-29348069	0.68349	0	0.528131	0.624756	0	0	0	0	0.510851	0.592203	TRUE	0
L1Md_F3_dup15017:L1Md_F3:L1:LINE	chr17:30169915-30176111	0	0	0.132033	1.5966	0	0	0	0	0	0.0538367	TRUE	0
L1Md_F3_dup331:L1Md_F3:L1:LINE	chr1:56831958-56832104	0	0	0.0660164	0.0694173	0	0	0	0.9181	0.360601	0.376857	TRUE	0
L1Md_F3_dup3979:L1Md_F3:L1:LINE	chr5:9289619-9292608	0.315457	0.926892	0	0	0	0	0	0.473858	0.390651	0	TRUE	0
L1Md_F3_dup6108:L1Md_F3:L1:LINE	chr7:84954218-84959241	0.0525761	0.142599	0.330082	0.485921	0.084955	0	0	0.177697	0.601001	0.080755	TRUE	0
L1Md_F3_dup6451:L1Md_F3:L1:LINE	chr8:13116307-13117195	0.262881	0.356497	0.396098	0	0	0	0	0.414626	1.3823	1.39975	TRUE	0
L1Md_F3_dup6746:L1Md_F3:L1:LINE	chr8:61570944-61571561	0.157728	0.213898	0	0.347086	0	0	0	0.888483	0.270451	0.32302	TRUE	0
L1Md_F3_dup7051:L1Md_F3:L1:LINE	chr8:129147041-129152263	0	0	0.660164	0	0.934505	0	0	0	0.540901	0.753713	TRUE	0
L1Md_Gf_dup288:L1Md_Gf:L1:LINE	chr6:96921930-96927322	0	0	0.132033	0.277669	0	0	0	0.621938	0.420701	0.215347	TRUE	0
L1Md_Gf_dup884:L1Md_Gf:L1:LINE	chr12:71207625-71208111	0.68349	0.570395	0.528131	0	0.33982	0	0	0	1.23205	0	TRUE	0
L1Md_T_dup10097:L1Md_T:L1:LINE	chr7:143828135-143828885	0.368033	0	0.132033	0.138835	0.16991	0	0	0.385009	0.480801	0.269183	TRUE	0
L1Md_T_dup10424:L1Md_T:L1:LINE	chr8:37827159-37830578	0	0	0.198049	0	0.254865	0	0	0.770019	0.1803	0.592203	TRUE	0
L1Md_T_dup10639:L1Md_T:L1:LINE	chr8:55971788-55973435	0.525761	0.142599	1.18829	0.416504	0.594685	0	0	1.21426	1.95325	0	TRUE	0
L1Md_T_dup10898:L1Md_T:L1:LINE	chr8:76200112-76206271	0.368033	1.63989	0.792196	0.694173	0	0	0	1.00695	1.0818	0.942142	TRUE	0
L1Md_T_dup11175:L1Md_T:L1:LINE	chr8:128813317-128818732	0.315457	0	0.396098	1.31893	0.67964	0	0	0.562706	1.1419	0.96906	TRUE	0
L1Md_T_dup12000:L1Md_T:L1:LINE	chrX:21755857-21762511	0	0.427797	0.264065	0.694173	0	0	0	0.621938	1.1419	0.538367	TRUE	0
L1Md_T_dup12157:L1Md_T:L1:LINE	chrX:9919132-9926002	0	0.0712994	0.396098	0	0.50973	0	0	0.296161	1.41235	0.269183	TRUE	0
L1Md_T_dup14020:L1Md_T:L1:LINE	chrX:141561115-141568691	0	0.285198	0	0	0	0	0	1.98428	1.29215	0.080755	TRUE	0
L1Md_T_dup14077:L1Md_T:L1:LINE	chrX:145045175-145050879	0	0.285198	0.924229	0.138835	0	0	0	0	0	0.349938	TRUE	0
L1Md_T_dup14773:L1Md_T:L1:LINE	chrY:29647242-29651645	0.630914	0	0.264065	0	0	0	0	0.592322	0.661101	0.107673	TRUE	0
L1Md_T_dup16481:L1Md_T:L1:LINE	chr10:112167315-112174741	0	0.285198	0.0660164	1.24951	1.27432	0	0	0	0.570951	0	TRUE	0
L1Md_T_dup16645:L1Md_T:L1:LINE	chr11:11342736-11348140	0	0.499096	0.132033	1.04126	0.084955	0	0	0.118464	0.540901	0.376857	TRUE	0
L1Md_T_dup18282:L1Md_T:L1:LINE	chr13:13882922-13889169	0	0.356497	0.660164	1.52718	0.67964	0	0	0.118464	0.540901	0	TRUE	0
L1Md_T_dup18356:L1Md_T:L1:LINE	chr13:20485991-20486986	0	0	0.264065	0	0	0	0	0.799635	0.811352	0.32302	TRUE	0
L1Md_T_dup18506:L1Md_T:L1:LINE	chr13:40587648-40593104	0	0.0712994	0.858213	0	0	0	0	0.207313	0	0	TRUE	0
L1Md_T_dup19169:L1Md_T:L1:LINE	chr14:4460932-4467232	0	0	0	0.277669	0	0	0	0.888483	0.540901	0	TRUE	0
L1Md_T_dup20266:L1Md_T:L1:LINE	chr14:124654232-124660284	0	0	0	0.485921	0.594685	0	0	0	0.0300501	0.296102	TRUE	0
L1Md_T_dup20621:L1Md_T:L1:LINE	chr15:34987446-34993772	0.420609	0.427797	0.72618	0	0	0	0	0	0	0.0269183	TRUE	0
L1Md_T_dup21936:L1Md_T:L1:LINE	chr16:97091686-97092210	0.157728	0.213898	0	0	0.254865	0	0	0.385009	0.270451	0.511448	TRUE	0
L1Md_T_dup21951:L1Md_T:L1:LINE	chr17:62386272-62392951	0	0.427797	0	0	0	0	0	0.592322	0.1803	0	TRUE	0
L1Md_T_dup21988:L1Md_T:L1:LINE	chr17:13838025-13845083	0	0.570395	0	0.833008	1.01946	0	0	0	1.3823	0	TRUE	0
L1Md_T_dup22664:L1Md_T:L1:LINE	chr18:7277325-7280949	0.315457	0.285198	0	0.555338	0	0	0	0.236929	0.1202	0	TRUE	0
L1Md_T_dup260:L1Md_T:L1:LINE	chr1:25403225-25408443	0	0	0.264065	0.416504	0.50973	0	0	0.207313	1.4424	0	TRUE	0
L1Md_T_dup3276:L1Md_T:L1:LINE	chr3:144828392-144834820	0.315457	0	0.396098	1.38835	0.254865	0	0	1.15503	3.66611	1.80353	TRUE	0
L1Md_T_dup4010:L1Md_T:L1:LINE	chr3:66226287-66233343	0.473185	0.855593	0.330082	0	0.16991	0	0	3.28739	1.8631	1.69586	TRUE	0
L1Md_T_dup4992:L1Md_T:L1:LINE	chr4:13931088-13935568	0	0.285198	0	0.833008	0	0	0	0	0.240401	0	TRUE	0
L1Md_T_dup5565:L1Md_T:L1:LINE	chr4:65984192-65990727	0	0	0	1.24951	0.50973	0	0	0	0.270451	0.32302	TRUE	0
L1Md_T_dup6356:L1Md_T:L1:LINE	chr5:8169173-8174491	0.630914	0.0712994	0	0.347086	0.67964	0	0	0	1.11185	0.242265	TRUE	0
L1Md_T_dup6381:L1Md_T:L1:LINE	chr5:10210675-10216107	0.157728	0.427797	0.198049	0.416504	0	0	0	0	0.721202	0	TRUE	0
L1Md_T_dup8395:L1Md_T:L1:LINE	chr6:89527391-89534263	0.788642	0.213898	0.528131	1.66602	0	0	0	0.651555	0.751252	0.430693	TRUE	0
L1Md_T_dup9781:L1Md_T:L1:LINE	chr7:92786949-92793342	0	0	0.72618	0	0	0	0	0.325777	0	0	TRUE	0
L1Md_T_dup9810:L1Md_T:L1:LINE	chr7:94292949-94298373	0	0.641695	0.0660164	0	0.594685	0	0	0	0.300501	0.269183	TRUE	0
L1VL2_dup545:L1VL2:L1:LINE	chr3:9457855-9460313	0.578338	0.570395	0.264065	0	0.16991	0	0	0	0.240401	0	TRUE	0
L1_Mm_dup1306:L1_Mm:L1:LINE	chr4:108928239-108929262	0	0.641695	0.330082	0.138835	0.16991	0	0	0.296161	0.420701	0.188428	TRUE	0
L1_Mm_dup2278:L1_Mm:L1:LINE	chr8:38000001-38001876	0	0.499096	0.330082	0.416504	0	0	0	0	0.21035	0.16151	TRUE	0
L1_Mm_dup4380:L1_Mm:L1:LINE	chr13:109469448-109470666	0	0.427797	0.462115	0.208252	0.16991	0	0	0.414626	0.901502	1.21133	TRUE	0
L1_Mur2_dup15750:L1_Mur2:L1:LINE	chr13:66690379-66690930	0.210305	0	0	0.277669	0	0	0	0.799635	0.721202	0.349938	TRUE	0
L1_Mus1_dup11253:L1_Mus1:L1:LINE	chr7:107256324-107256967	0	0	0.462115	0	0	0	0	1.71773	3.18531	1.69586	TRUE	0
L1_Mus1_dup18229:L1_Mus1:L1:LINE	chr10:83603276-83603956	0	0	0	0.138835	0	0	0	0.9181	0.961602	0.699877	TRUE	0
L1_Mus1_dup19618:L1_Mus1:L1:LINE	chr12:18873939-18874344	0.368033	0.641695	0.72618	0.76359	0.50973	0	0	0.562706	0.570951	0.995979	TRUE	0
L1_Mus1_dup19620:L1_Mus1:L1:LINE	chr12:19408012-19408417	0.368033	0.641695	0.72618	0.76359	0.50973	0	0	0.562706	0.570951	0.995979	TRUE	0
L1_Mus1_dup24889:L1_Mus1:L1:LINE	chr16:98062163-98064203	1.15668	1.56859	0.594147	0.902425	0.84955	0	0	0.207313	0.510851	0.32302	TRUE	0
L1_Mus1_dup3444:L1_Mus1:L1:LINE	chr2:176690554-176693842	1.15668	0.0712994	0	0	0	0	0	0	0.570951	0	TRUE	0
L1_Mus2_dup8535:L1_Mus2:L1:LINE	chr8:20275957-20276149	1.20925	0.356497	0	0	0.254865	0	0	0.118464	0.1803	0	TRUE	0
L1_Mus3_dup15103:L1_Mus3:L1:LINE	chr6:63277739-63278176	0	0	0.198049	0	0	0	0	0.9181	0.841402	0.565285	TRUE	0
L1_Mus3_dup36598:L1_Mus3:L1:LINE	chr12:78563043-78563715	0	0.356497	0.132033	0	0.16991	0	0	1.0958	0.0901502	0.215347	TRUE	0
L1_Mus3_dup39172:L1_Mus3:L1:LINE	chr14:4342587-4344430	0.105152	0.213898	0	0	1.18937	0	0	0.296161	0.450751	0.296102	TRUE	0
L1_Mus3_dup39253:L1_Mus3:L1:LINE	chr14:5449189-5451034	0.0525761	0	2.57464	0	0.424775	0	0	0.236929	0.21035	0.16151	TRUE	0
L1_Mus3_dup4273:L1_Mus3:L1:LINE	chr2:52413316-52415405	0.210305	0	0.264065	0.138835	0.16991	0	0	0.621938	1.0818	1.13057	TRUE	0
L1_Mus3_dup6100:L1_Mus3:L1:LINE	chr2:176618119-176618501	0	0.142599	0	0.347086	0.16991	0	0	0.473858	0.0300501	0.296102	TRUE	0
L1_Rod_dup2947:L1_Rod:L1:LINE	chr4:134520062-134520229	0	0	0	0	0	0	0	1.00695	0.631051	0.942142	TRUE	0
LTRIS2_dup1205:LTRIS2:ERV1:LTR	chr15:39241846-39242388	0	1.99638	0	0	0	0	0	0	0.901502	0	TRUE	0
LTRIS2_dup311:LTRIS2:ERV1:LTR	chr4:35990699-35991241	0	1.35469	0	0	0	0	0	0	0.721202	0	TRUE	0
LTRIS2_dup65:LTRIS2:ERV1:LTR	chr1:84332150-84332692	0.946371	0	1.32033	0	2.46369	0	0	0.325777	0.931552	2.42265	TRUE	0
Lx3_Mus_dup9978:Lx3_Mus:L1:LINE	chr14:7558119-7558253	0.420609	0	0	0	0	0	0	1.18464	0	0	TRUE	0
Lx8_dup34543:Lx8:L1:LINE	chr12:19395841-19395969	0.262881	0.213898	0.0660164	0.138835	0.254865	0	0	0.207313	0.300501	0	TRUE	0
Lx9_dup33144:Lx9:L1:LINE	chr12:21000175-21000399	0	0.998192	0	0	2.03892	0	0	0	0.0300501	0	TRUE	0
MERVL-int_dup110:MERVL-int:ERVL:LTR	chr1:105610392-105615365	0.315457	0	0	2.15194	0	0	0	0	0	0.16151	TRUE	0
MERVL-int_dup1424:MERVL-int:ERVL:LTR	chrX:95822764-95828046	0	0.356497	0.264065	0	0.764595	0	0	0.740403	1.29215	0	TRUE	0
MERVL-int_dup1980:MERVL-int:ERVL:LTR	chr13:62727115-62732473	0	0	0	1.11068	0	0	0	0	0.15025	0.242265	TRUE	0
MERVL-int_dup2118:MERVL-int:ERVL:LTR	chr14:86872849-86875409	0.788642	0	0	0.833008	0	0	0	1.12541	1.59265	0.296102	TRUE	0
MERVL-int_dup479:MERVL-int:ERVL:LTR	chr3:103972221-103972798	0.525761	0.499096	0	0.76359	0.084955	0	0	0.740403	1.17195	1.29208	TRUE	0
MERVL-int_dup63:MERVL-int:ERVL:LTR	chr1:58938825-58944155	1.47213	0.285198	0.396098	0	0.254865	0	0	0.444242	0	0.32302	TRUE	0
MERVL-int_dup73:MERVL-int:ERVL:LTR	chr1:77478026-77483312	0	0.356497	0	0	0.424775	0	0	0.325777	0.300501	0.430693	TRUE	0
MERVL-int_dup78:MERVL-int:ERVL:LTR	chr1:82397184-82402553	0	0	0.264065	2.29077	0	0	0	0	0	0.215347	TRUE	0
MMERGLN-int_dup232:MMERGLN-int:ERV1:LTR	chr9:25855660-25863214	0	11.907	0	0	0	0	0	0.0592322	0.871452	0	TRUE	0
MMERGLN-int_dup36:MMERGLN-int:ERV1:LTR	chr2:20381548-20389104	0.946371	1.85378	0	1.38835	3.31324	0	0	0	0.0300501	1.99196	TRUE	0
MMERGLN-int_dup618:MMERGLN-int:ERV1:LTR	chr10:25896041-25903595	0	42.138	5.54538	19.9922	29.8192	0	0	19.9613	148.477	9.04456	TRUE	0
MMERGLN-int_dup625:MMERGLN-int:ERV1:LTR	chr11:9443024-9450578	0	2.49548	0	0	0	0	0	0	1.11185	0	TRUE	0
MMERVK10C-int_dup1517:MMERVK10C-int:ERVK:LTR	chr8:3946330-3951359	0.788642	0.285198	0	0.416504	0	0	0	0	0.1202	0	TRUE	0
MMERVK10C-int_dup2627:MMERVK10C-int:ERVK:LTR	chr13:92617418-92624989	1.36698	0	0	0	0	0	0	0	0.540901	1.29208	TRUE	0
MMETn-int_dup126:MMETn-int:ERVK:LTR	chr3:95396355-95400745	0	0.427797	0.264065	0.76359	1.52919	0	0	0	0.240401	0	TRUE	0
MMETn-int_dup18:MMETn-int:ERVK:LTR	chr1:16937588-16941975	0	1.14079	1.84846	0	2.29378	0	0	1.27349	1.17195	0	TRUE	0
MMETn-int_dup953:MMETn-int:ERVK:LTR	chr18:44735600-44737143	1.1041	0.926892	6.20554	4.58154	1.10441	0	0	0.651555	2.40401	0.619122	TRUE	0
MMETn-int_dup975:MMETn-int:ERVK:LTR	chr19:38870468-38874668	0	0	0.330082	1.52718	1.86901	0	0	0	0	0.565285	TRUE	0
MMSAT4_dup110:MMSAT4:Satellite:Satellite	chr2:175480633-175481105	0	0.0712994	0	0.971842	0	0	0	0	0.480801	0	TRUE	0
MMSAT4_dup1287:MMSAT4:Satellite:Satellite	chr13:66671252-66671383	0	0	0.528131	0.555338	0	0	0	0	0.0601001	0.080755	TRUE	0
MMSAT4_dup129:MMSAT4:Satellite:Satellite	chr2:175978272-175978833	0	1.49729	0	0	0	0	0	0	3.12521	0	TRUE	0
MMSAT4_dup134:MMSAT4:Satellite:Satellite	chr2:176141834-176142559	3.5226	3.35107	0	0	6.11676	0	0	3.58355	3.51586	3.39171	TRUE	0
MMSAT4_dup150:MMSAT4:Satellite:Satellite	chr2:176681339-176681642	0.998947	1.28339	0	1.52718	1.61414	0	0	0	0.601001	0.780632	TRUE	0
MMSAT4_dup158:MMSAT4:Satellite:Satellite	chr2:176809495-176810560	2.4185	0.427797	0	0	4.41766	0	0	1.18464	1.59265	3.36479	TRUE	0
MMSAT4_dup168:MMSAT4:Satellite:Satellite	chr2:177011819-177012544	0	1.06949	0	0	0	0	0	0	2.61436	0.619122	TRUE	0
MMSAT4_dup203:MMSAT4:Satellite:Satellite	chr2:177569231-177569608	0	0	0.792196	0	0	0	0	1.06618	0.931552	0.780632	TRUE	0
MMSAT4_dup222:MMSAT4:Satellite:Satellite	chr2:177946620-177946913	2.62881	1.78249	2.24456	1.52718	2.03892	0	0	0.651555	1.803	0.726795	TRUE	0
MMSAT4_dup234:MMSAT4:Satellite:Satellite	chr3:12856535-12858068	0	0	1.45236	1.24951	0.934505	0	0	0	0.15025	0.64604	TRUE	0
MMSAT4_dup88:MMSAT4:Satellite:Satellite	chr2:175018844-175019221	0	0.213898	0	0	0.594685	0	0	0.473858	2.0434	1.80353	TRUE	0
MMVL30-int_dup906:MMVL30-int:ERV1:LTR	chr17:66017035-66019879	0	0	0	0	0.16991	0	0	0.947716	0	0	TRUE	0
MMVL30-int_dup922:MMVL30-int:ERV1:LTR	chr18:11643142-11646030	0.157728	0	0.396098	0	0.67964	0	0	1.39196	0.691152	0	TRUE	0
MMVL30-int_dup93:MMVL30-int:ERV1:LTR	chr2:86021075-86023030	0	0.142599	0	0.555338	0	0	0	0.444242	0.510851	0.457612	TRUE	0
MT2B1_dup4964:MT2B1:ERVL:LTR	chr12:20623360-20623769	0	0.855593	0	0.138835	0	0	0	0.325777	0	0	TRUE	0
MT2_Mm_dup1013:MT2_Mm:ERVL:LTR	chr7:25548243-25548735	0	0.213898	0	0.416504	0.16991	0	0	0.266545	0.300501	0	TRUE	0
MT2_Mm_dup1335:MT2_Mm:ERVL:LTR	chr9:94821689-94822180	0	0.285198	0.198049	0	0	0	0	0.710787	0.0901502	0.269183	TRUE	0
MT2_Mm_dup1778:MT2_Mm:ERVL:LTR	chr11:60657187-60657678	0	0	0.396098	0	0.764595	0	0	0	0	0.511448	TRUE	0
MTA_Mm-int_dup1081:MTA_Mm-int:ERVL-MaLR:LTR	chr5:123000001-123000522	0.210305	0	0.264065	0.485921	0	0	0	1.51042	0.691152	0.80755	TRUE	0
MTA_Mm-int_dup1508:MTA_Mm-int:ERVL-MaLR:LTR	chr9:3647963-3649060	0	0.356497	0	0.138835	0.084955	0	0	0.503474	1.0217	1.18441	TRUE	0
MTA_Mm-int_dup2076:MTA_Mm-int:ERVL-MaLR:LTR	chr11:21143533-21144705	0	0	0	0	0	0	0	1.42157	1.3823	1.07673	TRUE	0
MTA_Mm-int_dup2100:MTA_Mm-int:ERVL-MaLR:LTR	chr11:43237734-43238828	0	0.427797	0	0.138835	0	0	0	0.592322	0.0601001	0.32302	TRUE	0
MTA_Mm-int_dup2195:MTA_Mm-int:ERVL-MaLR:LTR	chr12:28757916-28759008	0	0.142599	0	0.138835	0	0	0	1.89543	1.05175	1.10365	TRUE	0
MTA_Mm-int_dup2385:MTA_Mm-int:ERVL-MaLR:LTR	chr14:25296653-25297746	0.473185	0.784294	0.132033	0.416504	1.27432	0	0	1.98428	0.270451	2.77259	TRUE	0
MTA_Mm-int_dup486:MTA_Mm-int:ERVL-MaLR:LTR	chr2:176238772-176239857	0	1.35469	0	0.138835	0.67964	0	0	0.0296161	0.360601	0.349938	TRUE	0
MTA_Mm-int_dup918:MTA_Mm-int:ERVL-MaLR:LTR	chr4:145609385-145610478	0	0	0	0	0.254865	0	0	0.799635	0.631051	1.34592	TRUE	0
MTA_Mm_dup4246:MTA_Mm:ERVL-MaLR:LTR	chr4:129321388-129321768	0	0.570395	0.396098	0	0.594685	0	0	0	0.0901502	0	TRUE	0
MTA_Mm_dup4317:MTA_Mm:ERVL-MaLR:LTR	chr4:146170260-146170653	0	1.99638	1.12228	0	0	0	0	3.10969	1.17195	1.58818	TRUE	0
MTA_Mm_dup7479:MTA_Mm:ERVL-MaLR:LTR	chr9:7824435-7824829	0.262881	0.213898	0.264065	0	0	0	0	0.562706	0.570951	0.215347	TRUE	0
MTE2a_dup2430:MTE2a:ERVL-MaLR:LTR	chr2:177184722-177185043	0.473185	0.641695	0.528131	0.902425	0.33982	0	0	0.473858	0.420701	0.538367	TRUE	0
MuLV-int_dup36:MuLV-int:ERV1:LTR	chr2:156357060-156360897	0	0	0	1.52718	1.52919	0	0	0	0.330551	0	TRUE	0
MuRRS-int_dup953:MuRRS-int:ERV1:LTR	chr17:6921366-6925849	0.630914	0.855593	0	0.277669	1.44423	0	0	2.22121	1.0818	1.58818	TRUE	0
MurSatRep1_dup1515:MurSatRep1:MurSatRep1:Unknown	chr12:18025781-18025936	0.210305	0	0	0.485921	0.33982	0	0	0	0.0601001	0.0538367	TRUE	0
MurSatRep1_dup1516:MurSatRep1:MurSatRep1:Unknown	chr12:18026160-18026833	0	0	0	0.76359	0.67964	0	0	0	0	0.215347	TRUE	0
MurSatRep1_dup154:MurSatRep1:MurSatRep1:Unknown	chr2:175283234-175284813	0	0	0	0.694173	2.29378	0	0	0	0.360601	0.188428	TRUE	0
MurSatRep1_dup162:MurSatRep1:MurSatRep1:Unknown	chr2:175423634-175425222	0	0.142599	1.32033	0	0	0	0	0	0.0901502	0	TRUE	0
MurSatRep1_dup1639:MurSatRep1:MurSatRep1:Unknown	chr12:20319272-20320117	0.368033	0.641695	1.58439	0.902425	0.67964	0	0	0.414626	0.0901502	0	TRUE	0
MurSatRep1_dup1659:MurSatRep1:MurSatRep1:Unknown	chr12:20634119-20635121	0.68349	0	0	0	0.84955	0	0	0	0.300501	0.96906	TRUE	0
MurSatRep1_dup1677:MurSatRep1:MurSatRep1:Unknown	chr12:21015042-21015422	0	0	0.990246	0.971842	0	0	0	0	0.0601001	0.592203	TRUE	0
MurSatRep1_dup1710:MurSatRep1:MurSatRep1:Unknown	chr12:22128503-22128802	0.368033	0.285198	0	0	0.33982	0	0	0.562706	0.0300501	1.04982	TRUE	0
MurSatRep1_dup171:MurSatRep1:MurSatRep1:Unknown	chr2:175748497-175750085	0	0.356497	0.528131	0	5.01234	0	0	0	0.1202	0	TRUE	0
MurSatRep1_dup178:MurSatRep1:MurSatRep1:Unknown	chr2:175880219-175880422	0.0525761	0	0	0	1.10441	0	0	0.0592322	0.0601001	0	TRUE	0
MurSatRep1_dup184:MurSatRep1:MurSatRep1:Unknown	chr2:175921599-175923179	2.52366	1.42599	2.97074	3.74853	1.01946	0	0	0.888483	1.5025	0.134592	TRUE	0
MurSatRep1_dup1909:MurSatRep1:MurSatRep1:Unknown	chr13:62111540-62111745	1.15668	1.14079	0.792196	1.04126	0.424775	0	0	0	1.95325	2.3419	TRUE	0
MurSatRep1_dup190:MurSatRep1:MurSatRep1:Unknown	chr2:176097386-176098971	0.315457	0.784294	2.37659	5.48397	0.254865	0	0	0	0.1803	0	TRUE	0
MurSatRep1_dup202:MurSatRep1:MurSatRep1:Unknown	chr2:176298768-176300357	0	0	1.05626	0	0	0	0	0	0	1.21133	TRUE	0
MurSatRep1_dup209:MurSatRep1:MurSatRep1:Unknown	chr2:176474612-176476200	1.05152	0.641695	0.132033	0	0	0	0	0	0.0901502	0	TRUE	0
MurSatRep1_dup2157:MurSatRep1:MurSatRep1:Unknown	chr13:66528408-66528692	0.0525761	0	0.594147	0.416504	0.16991	0	0	0.296161	0.450751	0.0538367	TRUE	0
MurSatRep1_dup215:MurSatRep1:MurSatRep1:Unknown	chr2:176624176-176625764	0	0.570395	0.594147	0	0	0	0	0	0.0300501	0	TRUE	0
MurSatRep1_dup220:MurSatRep1:MurSatRep1:Unknown	chr2:176718890-176720479	0.946371	0	0.594147	0	0.67964	0	0	0.0592322	0	0	TRUE	0
MurSatRep1_dup256:MurSatRep1:MurSatRep1:Unknown	chr2:177168575-177169184	0	0	1.12228	0	0.84955	0	0	0.118464	0.270451	0	TRUE	0
MurSatRep1_dup259:MurSatRep1:MurSatRep1:Unknown	chr2:177193858-177193935	0.262881	0.499096	0	0.485921	0	0	0	0	0.15025	0	TRUE	0
MurSatRep1_dup271:MurSatRep1:MurSatRep1:Unknown	chr2:177387362-177387558	0.893795	0.427797	0	0	0	0	0	0	0.450751	0.376857	TRUE	0
MurSatRep1_dup301:MurSatRep1:MurSatRep1:Unknown	chr2:177947039-177948630	0	0.712994	2.04651	2.08252	0.84955	0	0	0.770019	0	1.15749	TRUE	0
MurSatRep1_dup652:MurSatRep1:MurSatRep1:Unknown	chr7:27844279-27844422	0.473185	0.285198	0.264065	0	0	0	0	0	0.300501	0	TRUE	0
MurSatRep1_dup710:MurSatRep1:MurSatRep1:Unknown	chr7:41547670-41548374	0.736066	0.285198	0.0660164	0.624756	0	0	0	1.18464	0.871452	1.04982	TRUE	0
ORR1A0-int_dup118:ORR1A0-int:ERVL-MaLR:LTR	chr4:108583579-108584699	0	0.0712994	0	0.347086	0.594685	0	0	0.858867	0.811352	0.753713	TRUE	0
ORR1A0-int_dup122:ORR1A0-int:ERVL-MaLR:LTR	chr4:149746580-149748352	0	0.356497	0	0.416504	0.084955	0	0	0.829251	0.811352	0.349938	TRUE	0
ORR1A0-int_dup452:ORR1A0-int:ERVL-MaLR:LTR	chr19:25005534-25005730	0.473185	0.285198	0	0.138835	0.16991	0	0	0.325777	1.0818	0.376857	TRUE	0
ORR1A0_dup233:ORR1A0:ERVL-MaLR:LTR	chr2:134628410-134628756	0.0525761	0	0.462115	0	0	0	0	0.710787	0.1202	0.269183	TRUE	0
ORR1A1-int_dup124:ORR1A1-int:ERVL-MaLR:LTR	chr3:33822172-33822632	0	0.142599	0.792196	0.416504	0.33982	0	0	0	0.0300501	1.0229	TRUE	0
ORR1A1-int_dup81:ORR1A1-int:ERVL-MaLR:LTR	chr2:88318645-88318834	0	0	0	0.138835	0.33982	0	0	0.53309	0.661101	0	TRUE	0
ORR1A3-int_dup1533:ORR1A3-int:ERVL-MaLR:LTR	chr11:4775828-4775914	0	0	0	1.04126	0	0	0	0.0296161	0.0601001	1.07673	TRUE	0
ORR1A4-int_dup1030:ORR1A4-int:ERVL-MaLR:LTR	chr13:74605221-74606364	0.315457	0	0.198049	0.416504	0.33982	0	0	0.325777	0.631051	0	TRUE	0
ORR1D1_dup2780:ORR1D1:ERVL-MaLR:LTR	chr2:176702543-176702878	0.105152	0	0.528131	0.277669	0.424775	0	0	0.0888483	0.0300501	0	TRUE	0
RLTR10-int_dup2326:RLTR10-int:ERVK:LTR	chr16:48541691-48542685	0.157728	0	0.264065	0	0	0	0	0.977332	0.570951	0.32302	TRUE	0
RLTR10-int_dup2:RLTR10-int:ERVK:LTR	chr1:97779127-97781182	0.105152	0.213898	0	0	0	0	0	1.33273	0	0	TRUE	0
RLTR12BD_Mm_dup227:RLTR12BD_Mm:ERVK:LTR	chr4:146266916-146267179	1.68244	1.42599	0.990246	0	0	0	0	0	1.89315	1.50743	TRUE	0
RLTR14-int_dup1294:RLTR14-int:ERV1:LTR	chr14:6268100-6268715	0.893795	0.142599	0	0.971842	0	0	0	0.621938	0.781302	1.50743	TRUE	0
RLTR14-int_dup1362:RLTR14-int:ERV1:LTR	chr14:7553343-7553958	4.25867	2.06768	5.34733	0	0	0	0	0	1.17195	0	TRUE	0
RLTR1B-int_dup220:RLTR1B-int:ERV1:LTR	chr5:104823410-104825961	0	0	0	0	0	0	0	3.34662	0	0	TRUE	0
RLTR1B-int_dup648:RLTR1B-int:ERV1:LTR	chr15:22704721-22704839	0	0	0	0	0	0	0	2.07313	0.1202	0	TRUE	0
RLTR1B-int_dup711:RLTR1B-int:ERV1:LTR	chr17:15054277-15054886	0.841218	1.49729	1.18829	1.45776	0	0	0	1.68812	2.94491	0	TRUE	0
RLTR1B-int_dup85:RLTR1B-int:ERV1:LTR	chr2:150706622-150706740	0	0.784294	2.11252	0	0.764595	0	0	0.0888483	1.23205	0.430693	TRUE	0
RLTR31D_MM_dup6530:RLTR31D_MM:ERVK:LTR	chr14:3812409-3812498	0	0	0.330082	0.208252	0.594685	0	0	0	0.270451	0	TRUE	0
RLTR40_dup668:RLTR40:ERVK:LTR	chr4:146646138-146646683	1.15668	0.427797	0	0	0	0	0	0.355393	0.540901	0	TRUE	0
RLTR4_MM-int_dup147:RLTR4_MM-int:ERV1:LTR	chr5:76931213-76938800	0	0.499096	0	0	0	0	0	1.98428	2.2237	0.242265	TRUE	0
RLTR4_Mm_dup118:RLTR4_Mm:ERV1:LTR	chr8:123171337-123172077	0	0.784294	0	0	0.84955	0	0	0	2.25375	0	TRUE	0
RLTR4_Mm_dup220:RLTR4_Mm:ERV1:LTR	chr15:79895866-79896093	0	0	0	0	0.254865	0	0	1.48081	0	0	TRUE	0
RLTR6_Mm_dup13:RLTR6_Mm:ERV1:LTR	chr2:23009729-23010331	0.262881	0.142599	0.72618	0	0	0	0	0.947716	0.450751	0.834468	TRUE	0
RLTR6_Mm_dup77:RLTR6_Mm:ERV1:LTR	chr6:142172144-142172824	0.0525761	0.142599	1.45236	0.624756	0	0	0	0.118464	0.240401	0.64604	TRUE	0
RMER16-int_dup1973:RMER16-int:ERVK:LTR	chr13:66777253-66777479	0	0.0712994	0	1.04126	0.50973	0	0	0	0.450751	0	TRUE	0
RMER16-int_dup2575:RMER16-int:ERVK:LTR	chr19:22726788-22726977	0	1.14079	0	0	0	0	0	0	0.300501	0	TRUE	0
URR1A_dup13873:URR1A:hAT-Charlie:DNA	chr14:5453719-5453939	0	0.855593	1.58439	0	1.44423	0	0	0.444242	0.0601001	0.430693	TRUE	0
URR1A_dup13881:URR1A:hAT-Charlie:DNA	chr14:5806210-5806430	0	1.35469	1.58439	0	1.44423	0	0	0.444242	0.0601001	0.430693	TRUE	0
RLTR4_MM-int_dup42:RLTR4_MM-int:ERV1:LTR	chr2:16021236-16028795	0.105152	6.27435	3.30082	2.42961	0	0.0931411	0	9.24023	7.57262	2.28806	TRUE	0.00726129
B2_Mm1a_dup5009:B2_Mm1a:B2:SINE	chr5:92352627-92352786	4.04836	0.142599	2.24456	0.902425	6.0318	0	0.0303549	2.60622	3.33556	0	TRUE	0.0076048
RLTR19-int_dup1072:RLTR19-int:ERVK:LTR	chr8:112013580-112014165	0	2.70938	0	0.694173	0	0.031047	0	0.770019	5.22871	0	TRUE	0.0077036
L1_Mus3_dup15600:L1_Mus3:L1:LINE	chr6:84658930-84660367	0.0525761	0	0.132033	0	0.50973	0.031047	0	1.24388	1.29215	1.85737	TRUE	0.0104889
MTA_Mm_dup8802:MTA_Mm:ERVL-MaLR:LTR	chrX:103307764-103308156	0.315457	0.499096	0.264065	0	0.424775	0.031047	0	0.799635	1.11185	1.88428	TRUE	0.0121204
L1Md_F2_dup63130:L1Md_F2:L1:LINE	chr18:67953726-67954495	0.157728	0.213898	0	0	0	0.0620941	0	3.19854	1.5626	2.2073	TRUE	0.0131898
RLTR40_dup669:RLTR40:ERVK:LTR	chr4:146646773-146646983	0	1.06949	0	0	0	0.031047	0	1.80658	1.35225	0	TRUE	0.0145288
RLTR10-int_dup2584:RLTR10-int:ERVK:LTR	chr19:16670962-16672910	0.68349	0.641695	0.330082	0	0.594685	0.0620941	0	2.04351	2.1636	1.9112	TRUE	0.014995
MMSAT4_dup946:MMSAT4:Satellite:Satellite	chr12:18873671-18873888	0.420609	0.356497	0.660164	0.485921	0.50973	0.031047	0	0.325777	0.751252	1.77661	TRUE	0.0160577
L1_Mus3_dup11599:L1_Mus3:L1:LINE	chr4:116358412-116359526	0.262881	0.427797	0	0.277669	0	0.031047	0	0.740403	0.721202	1.18441	TRUE	0.0172959
RLTR10-int_dup282:RLTR10-int:ERVK:LTR	chr2:138454385-138455077	0	0	0	0	0.33982	0.031047	0	0.710787	0.480801	1.18441	TRUE	0.0192237
L1Md_T_dup16486:L1Md_T:L1:LINE	chr10:112323189-112328627	0	0.356497	0	0	0.50973	0.031047	0	0.444242	0.691152	0.834468	TRUE	0.0230955
RLTR1B-int_dup693:RLTR1B-int:ERV1:LTR	chr17:6576741-6579413	0	0.142599	0	0.694173	0.084955	0.031047	1.09277	41.1368	24.4608	0	TRUE	0.0250543
L1Md_T_dup16092:L1Md_T:L1:LINE	chr10:63723515-63729430	0.210305	1.06949	0	0	0	0	0.0303549	0.296161	0.570951	0.861387	TRUE	0.025666
L1_Mus1_dup17600:L1_Mus1:L1:LINE	chr10:12443166-12443404	0	0	0.264065	0.277669	0	0.031047	0	0.740403	0.300501	0.726795	TRUE	0.025669
L1Md_F2_dup46195:L1Md_F2:L1:LINE	chr11:76585090-76586164	0	0.285198	0.330082	0.208252	0.50973	0.0620941	0	1.21426	0.661101	1.45359	TRUE	0.0272176
L1Md_T_dup17845:L1Md_T:L1:LINE	chr12:68939674-68943644	0.525761	0.213898	0	0.416504	0	0.031047	0	0.236929	0.781302	0.619122	TRUE	0.027656
RLTRETN_Mm_dup716:RLTRETN_Mm:ERVK:LTR	chrX:168260327-168260647	0	0.499096	0.198049	0.0694173	0.594685	0.031047	0	0.473858	0.661101	0.430693	TRUE	0.0288859
RMER6C_dup1351:RMER6C:ERVK:LTR	chr4:145675526-145675667	0.0525761	0.641695	0.0660164	0	0.934505	0.031047	0.0607097	1.0958	1.17195	2.07271	TRUE	0.0307352
RLTR40_dup677:RLTR40:ERVK:LTR	chr4:147167684-147167894	0	1.06949	0	0	0	0.031047	0	0	1.35225	0	TRUE	0.0332927
PB1_dup9467:PB1:Alu:SINE	chr14:7461354-7461459	0.105152	0.0712994	0	0.138835	0.254865	0.0620941	0	0.9181	0.841402	0.915223	TRUE	0.0336509
IAPEz-int_dup4931:IAPEz-int:ERVK:LTR	chr11:74540564-74541733	0	0	0	0	0	0.124188	0	2.54699	1.77295	0.80755	TRUE	0.0350565
L1_Mm_dup921:L1_Mm:L1:LINE	chr3:84522006-84522650	0.105152	0.0712994	0	0.208252	0	0	0.0910646	1.18464	1.1419	1.319	TRUE	0.0361163
L1Md_F3_dup11730:L1Md_F3:L1:LINE	chr11:90562101-90563797	0.525761	0.0712994	0	0	0	0.0620941	0	0.503474	0.871452	1.04982	TRUE	0.0369918
L1_Mus3_dup27271:L1_Mus3:L1:LINE	chrX:150545411-150546202	0	0.0712994	0.0660164	0	0.16991	0.0620941	0	0.681171	0.811352	0.834468	TRUE	0.038486
L1Md_T_dup7468:L1Md_T:L1:LINE	chr5:138024274-138030739	0.630914	0	0.528131	1.11068	0	0.031047	0	0	0.961602	0.188428	TRUE	0.038919
L1Md_F2_dup47006:L1Md_F2:L1:LINE	chr12:20906323-20908263	0.788642	0.427797	0	0	0.16991	0.186282	0	1.98428	2.19365	2.69183	TRUE	0.0390846
L1Md_F2_dup31391:L1Md_F2:L1:LINE	chr9:53652602-53654010	0.315457	0.213898	0.330082	0	0	0.155235	0	1.27349	2.52421	1.88428	TRUE	0.0393676
MurSatRep1_dup2199:MurSatRep1:MurSatRep1:Unknown	chr13:66851563-66851861	1.73501	0.855593	0.528131	0	0	0.0620941	0	0	0.961602	1.23824	TRUE	0.04062
MTC-int_dup2587:MTC-int:ERVL-MaLR:LTR	chr13:59641496-59642165	0	0	0	0.277669	0	0.0620941	0	0.770019	0.0901502	1.29208	TRUE	0.041481
L1Md_F2_dup26828:L1Md_F2:L1:LINE	chr7:97053197-97054204	0.157728	0	0	0.347086	0	0.0620941	0	0.799635	0.751252	0.403775	TRUE	0.0454834
RLTR1B-int_dup657:RLTR1B-int:ERV1:LTR	chr15:39243112-39244534	0	0.570395	2.04651	0.416504	3.56811	0.993505	0.789226	9.26984	23.4992	20.781	TRUE	0.0475615
L1Md_A_dup7147:L1Md_A:L1:LINE	chr8:62627335-62628935	0	0.213898	0.330082	0.485921	0.33982	0.031047	0	0.207313	0.360601	0.349938	TRUE	0.0482885
ORR1A1-int_dup172:ORR1A1-int:ERVL-MaLR:LTR	chr4:43111419-43112575	0	0	0	0.208252	0.424775	0.0931411	0	1.27349	0.601001	0.861387	TRUE	0.0485853
B2_Mm1a_dup3246:B2_Mm1a:B2:SINE	chr4:33087434-33087599	0.105152	0.427797	0.462115	0.138835	0.16991	0	0.0303549	0.177697	0.510851	0.188428	TRUE	0.049357
L1Md_T_dup17016:L1Md_T:L1:LINE	chr11:66332478-66333349	0.0525761	0	0.132033	0	0.50973	0.0620941	0	0.681171	0.631051	0.457612	TRUE	0.0499959
MTA_Mm-int_dup2260:MTA_Mm-int:ERVL-MaLR:LTR	chr12:84477239-84478331	0	0.570395	0.198049	0	0	0.031047	0	0.444242	0.420701	0	TRUE	0.0510915
L1_Mm_dup5316:L1_Mm:L1:LINE	chr18:89049032-89050299	0	0	0.198049	0.555338	0	0.186282	0.121419	2.54699	3.36561	2.638	TRUE	0.0512145
L1Md_F2_dup54261:L1Md_F2:L1:LINE	chr14:99184680-99185674	0	0	0	0	0	0.155235	0	1.06618	1.71285	1.53435	TRUE	0.0512189
B1_Mus1_dup75746:B1_Mus1:Alu:SINE	chr14:4200991-4201124	0	0.142599	0	0.277669	0	0.031047	0.0303549	1.12541	0.360601	0.16151	TRUE	0.052944
L1MA6_dup2097:L1MA6:L1:LINE	chr5:101985380-101985684	0.0525761	0	0.132033	0.0694173	0.254865	0	0.0607097	0.651555	0.601001	0.349938	TRUE	0.0537711
URR1A_dup4162:URR1A:hAT-Charlie:DNA	chr4:152050387-152050464	0.315457	0	0	0	0.084955	0.372564	0	4.35357	2.55426	2.90718	TRUE	0.0538707
L1Md_F2_dup31470:L1Md_F2:L1:LINE	chr9:66401065-66401883	0.210305	0.499096	0.264065	0.138835	0.254865	0.403612	0	2.69507	3.81636	3.98391	TRUE	0.0545384
MTA_Mm_dup4338:MTA_Mm:ERVL-MaLR:LTR	chr4:147630867-147631259	0.210305	0.712994	0.594147	0.277669	0	0.031047	0.0607097	0.977332	1.1419	0.242265	TRUE	0.0550731
L1Md_F2_dup64092:L1Md_F2:L1:LINE	chr19:21668448-21669387	0.315457	0.0712994	0.0660164	0	0	0.124188	0	0.799635	1.6828	0.672958	TRUE	0.0557451
L1Md_F2_dup7459:L1Md_F2:L1:LINE	chr2:104601140-104602130	0.368033	0.499096	0.594147	0	0	0.0931411	0.607097	5.44937	5.79966	6.05663	TRUE	0.0572214
L1_Mus1_dup24154:L1_Mus1:L1:LINE	chr16:32343086-32343898	0	0	0	0	0.254865	0.279423	0.0607097	2.84315	1.89315	3.47247	TRUE	0.0585161
ID_B1_dup90055:ID_B1:B4:SINE	chr14:6071280-6071493	0.210305	0.285198	0.396098	0.485921	0	0.0931411	0	0.888483	0.240401	0.995979	TRUE	0.0616945
MTA_Mm-int_dup816:MTA_Mm-int:ERVL-MaLR:LTR	chr4:44139774-44140869	0.525761	1.42599	0	0.277669	0.33982	0.869317	0	9.0033	6.01001	4.73763	TRUE	0.0619321
L1Md_F3_dup2263:L1Md_F3:L1:LINE	chr3:41720444-41722761	0.578338	0.641695	0.198049	0	0	0.186282	0	1.03656	1.83305	1.34592	TRUE	0.0621637
L1_Mur2_dup15749:L1_Mur2:L1:LINE	chr13:66689282-66690085	0.473185	0	0.594147	0.971842	0.50973	0.217329	0	1.00695	1.29215	2.58416	TRUE	0.0625798
MMSAT4_dup1251:MMSAT4:Satellite:Satellite	chr13:66340804-66340934	0.315457	0.641695	0.198049	0.416504	0.33982	0.031047	0	0	0.1803	0.511448	TRUE	0.0630764
L1Md_A_dup16710:L1Md_A:L1:LINE	chr19:33723955-33730637	0.578338	1.28339	0.792196	2.42961	0.934505	0.465706	0	2.10274	5.37896	2.69183	TRUE	0.0642524
MERVL-int_dup1114:MERVL-int:ERVL:LTR	chr8:70909857-70910695	0	0.142599	0	0	0	0.279423	0	2.19159	2.07345	1.74969	TRUE	0.065145
MMERGLN-int_dup132:MMERGLN-int:ERV1:LTR	chr5:81626059-81633612	0	35.1506	0	0	2.80351	1.92492	24.2839	334.988	175.492	48.6953	TRUE	0.0656875
L1Md_F3_dup6263:L1Md_F3:L1:LINE	chr7:104251109-104257425	0.210305	0.427797	0.660164	0	0	0.31047	0	1.39196	3.45576	1.66894	TRUE	0.0666975
MurSatRep1_dup151:MurSatRep1:MurSatRep1:Unknown	chr2:175196416-175198000	3.94321	0.998192	4.8192	0	0.50973	0.124188	0	0.888483	1.35225	0.32302	TRUE	0.067738
ORR1A4-int_dup999:ORR1A4-int:ERVL-MaLR:LTR	chr13:65517546-65517823	0.157728	0.0712994	0	0.208252	0.594685	0	0.0303549	0.325777	0.300501	0	TRUE	0.0677755
L1_Mm_dup5248:L1_Mm:L1:LINE	chr18:47068372-47069581	0	0.712994	0.990246	0.208252	0.33982	0.683035	0	4.50165	3.90651	5.67977	TRUE	0.0677951
MMSAT4_dup255:MMSAT4:Satellite:Satellite	chr4:145536966-145538422	0	0.641695	1.12228	1.45776	0	0.155235	0	0.740403	0.570951	1.88428	TRUE	0.067917
B2_Mm1a_dup1180:B2_Mm1a:B2:SINE	chr2:25529674-25529843	0.473185	0	0.0660164	0.208252	0	0.031047	0	0.385009	0.15025	0.080755	TRUE	0.0702861
L1_Mm_dup1696:L1_Mm:L1:LINE	chr6:52613760-52614381	0.157728	0	0.462115	0	0	0.0931411	0	0.385009	0.691152	0.753713	TRUE	0.0709345
L1Md_A_dup1894:L1Md_A:L1:LINE	chr2:110762525-110764428	0.262881	0.0712994	0.264065	0.555338	0.084955	0.031047	0.151774	1.15503	1.1419	1.23824	TRUE	0.0719881
L1Md_A_dup16125:L1Md_A:L1:LINE	chr18:10230065-10235237	0	0.285198	0.528131	0.485921	0	0.0620941	0	0.562706	0.631051	0	TRUE	0.0723764
RLTR6_Mm_dup112:RLTR6_Mm:ERV1:LTR	chrX:87730656-87731245	0.262881	0.499096	0.264065	0	0	0	0.121419	0.799635	0.601001	0.888305	TRUE	0.0737045
L1Md_F2_dup56180:L1Md_F2:L1:LINE	chr15:35658526-35659374	0.157728	0	0	0	0	0.124188	0	1.03656	0.871452	0.430693	TRUE	0.0737754
Lx_dup19451:Lx:L1:LINE	chr14:3834428-3835052	0.0525761	0.0712994	0	0.138835	0.33982	0.31047	0.151774	2.31006	2.58431	3.76857	TRUE	0.074107
B2_Mm2_dup55587:B2_Mm2:B2:SINE	chr10:84985601-84985775	0.368033	0.0712994	0.330082	0	0.084955	0.031047	0	0.296161	0.15025	0.134592	TRUE	0.0742073
L1_Mus3_dup39374:L1_Mus3:L1:LINE	chr14:7016319-7018165	0	0.0712994	0	0	0	0	0.242839	1.6585	0.540901	2.31498	TRUE	0.0746639
L1_Mm_dup410:L1_Mm:L1:LINE	chr2:5814663-5815573	0	0	0.264065	0.138835	0.16991	0.155235	0.242839	2.28044	2.85476	2.2073	TRUE	0.0752066
L1Md_F2_dup32156:L1Md_F2:L1:LINE	chr9:100935553-100938664	0.525761	0.499096	0.660164	0.416504	0	0	0.182129	0.651555	1.23205	1.42667	TRUE	0.0762371
MERVL-int_dup286:MERVL-int:ERVL:LTR	chr2:113096282-113101640	1.15668	0.213898	2.37659	0	0.594685	0.217329	0	0.355393	2.1636	1.39975	TRUE	0.0767994
L1Md_F2_dup27326:L1Md_F2:L1:LINE	chr7:128385557-128385889	0.210305	0.0712994	0	0	0.16991	0.0620941	0.0910646	0.888483	1.4424	0.430693	TRUE	0.0768016
B2_Mm1t_dup10484:B2_Mm1t:B2:SINE	chr8:85422709-85422901	0	0.0712994	0.264065	0.416504	0.33982	0.155235	0	0.651555	1.41235	0.726795	TRUE	0.0770129
L1Md_Gf_dup227:L1Md_Gf:L1:LINE	chr5:58000001-58000824	0.157728	0.784294	0	0.902425	0	0	0.212484	1.12541	1.53255	1.15749	TRUE	0.0770953
L1_Mus1_dup23606:L1_Mus1:L1:LINE	chr15:53555345-53555964	0.210305	0.356497	0.198049	0	0	0.031047	0	0.236929	0.21035	0.107673	TRUE	0.077421
L1VL2_dup3775:L1VL2:L1:LINE	chr14:7461599-7462015	0.157728	0.213898	0.264065	0.0694173	0.16991	0.124188	0.121419	0.977332	1.23205	2.18039	TRUE	0.0774269
L1Md_F2_dup49105:L1Md_F2:L1:LINE	chr12:102867530-102868812	0.315457	0	0.990246	0.694173	0.33982	0	0.333903	1.0958	2.70451	2.09963	TRUE	0.078249
L1Md_T_dup23529:L1Md_T:L1:LINE	chr19:39392435-39398659	0.315457	0	0.462115	1.38835	0.764595	0.248376	0	1.00695	2.37396	0.915223	TRUE	0.0798006
B2_Mm1t_dup22832:B2_Mm1t:B2:SINE	chr19:29525418-29525609	0.788642	0.285198	0	0	0	0.031047	0	0	0.21035	0.32302	TRUE	0.0803022
MMERVK10C-int_dup1713:MMERVK10C-int:ERVK:LTR	chr9:64416832-64416950	0.210305	0.142599	0	0	0.254865	0.186282	0	1.21426	0.450751	1.53435	TRUE	0.0803222
L1_Mm_dup835:L1_Mm:L1:LINE	chr3:56153134-56154923	0.525761	1.21209	0.924229	0.76359	0.424775	0.341517	0.394613	2.96161	5.73956	3.66089	TRUE	0.0819972
L1Md_F2_dup11962:L1Md_F2:L1:LINE	chr3:106564203-106565542	0.105152	0.356497	0	0.624756	0	0.0620941	0.151774	0.562706	1.29215	1.72277	TRUE	0.0822901
L1Md_F2_dup1160:L1Md_F2:L1:LINE	chr1:39966530-39967943	0.315457	0.570395	0.528131	0.0694173	0	0.465706	0.546387	5.98246	5.70951	5.19524	TRUE	0.0824836
L1Md_F2_dup51712:L1Md_F2:L1:LINE	chr13:114383195-114384742	0	0	0	0	0	0.186282	0	0.947716	1.1419	0.995979	TRUE	0.0830376
MMSAT4_dup219:MMSAT4:Satellite:Satellite	chr2:177945445-177945653	0.788642	1.35469	0.792196	2.29077	0	0.279423	0	0.799635	1.59265	2.15347	TRUE	0.0844198
IAPEz-int_dup5678:IAPEz-int:ERVK:LTR	chr13:109852063-109858481	0	0.285198	0	0	0.764595	0.186282	0	1.0958	0.390651	1.50743	TRUE	0.0853645
B2_Mm1a_dup15657:B2_Mm1a:B2:SINE	chr15:102572673-102572832	1.84017	0.285198	0	3.12378	0	0.465706	0	3.55393	2.31386	1.39975	TRUE	0.0876914
L1Md_F2_dup32235:L1Md_F2:L1:LINE	chr9:107015238-107017120	0.368033	0	0	0	0	0.124188	0	0.651555	0.931552	0.349938	TRUE	0.0878969
L1Md_F2_dup7470:L1Md_F2:L1:LINE	chr2:104949643-104950611	0.315457	0	0.594147	0.277669	0.424775	0.248376	0	1.00695	1.5025	1.34592	TRUE	0.0881198
L1Md_F2_dup42375:L1Md_F2:L1:LINE	chr10:17936829-17938932	0	0.499096	0	0	0	0.558847	0	2.16198	3.96661	2.44957	TRUE	0.0890221
RLTR25B_dup2455:RLTR25B:ERVK:LTR	chr11:97237563-97237644	0	0.427797	0	0	0.16991	0	0.242839	1.98428	0.570951	1.15749	TRUE	0.0893452
L1Md_F3_dup12477:L1Md_F3:L1:LINE	chr13:10156575-10156688	0.157728	0.0712994	0	0	0.254865	0	0.0910646	0.621938	0.390651	0.376857	TRUE	0.0895105
L1MD1_dup12:L1MD1:L1:LINE	chr1:11495024-11497876	0.420609	0.926892	0	0.485921	0.424775	0.0931411	0	0	0.661101	0.753713	TRUE	0.0898741
RLTR4_Mm_dup74:RLTR4_Mm:ERV1:LTR	chr5:25238930-25239670	1.78759	2.42418	0.330082	0.138835	0.84955	1.02455	0.151774	10.3064	2.76461	4.76455	TRUE	0.0900248
L1Md_F3_dup3889:L1Md_F3:L1:LINE	chr4:118003923-118005262	0.420609	0	0	0.138835	0	0	0.333903	1.12541	2.52421	1.39975	TRUE	0.0902405
L1Md_A_dup13466:L1Md_A:L1:LINE	chr13:66586668-66587858	1.05152	0.641695	1.12228	1.31893	1.01946	1.17979	0	5.98246	5.10851	6.59499	TRUE	0.0909598
B1_Mus2_dup37211:B1_Mus2:Alu:SINE	chrX:12113074-12113161	0.368033	0.0712994	0.198049	0.138835	0.254865	0.0620941	0	0.473858	0.21035	0.242265	TRUE	0.0913494
B2_Mm2_dup21549:B2_Mm2:B2:SINE	chr4:147678998-147679181	0	2.49548	0.0660164	0	3.14333	0.124188	0	1.36234	0.480801	0	TRUE	0.0917907
L1Md_A_dup8197:L1Md_A:L1:LINE	chrX:24616637-24622435	0	0.285198	0.792196	1.31893	0	0	0.333903	0.503474	2.37396	2.07271	TRUE	0.0918832
RLTR10_dup1853:RLTR10:ERVK:LTR	chr10:68246024-68246445	0	0	0	0	0.254865	0.124188	0	0.710787	0.631051	0.48453	TRUE	0.0925557
MTA_Mm-int_dup1987:MTA_Mm-int:ERVL-MaLR:LTR	chr10:62636935-62638022	0.788642	0.142599	0.594147	0.347086	0.67964	0.589894	0	2.28044	3.12521	3.2302	TRUE	0.0929387
L1Md_F2_dup52401:L1Md_F2:L1:LINE	chr14:30748896-30753824	0.788642	0.427797	1.12228	0.76359	0	0.186282	0	0.148081	1.6828	0.861387	TRUE	0.0940283
L1Md_A_dup13845:L1Md_A:L1:LINE	chr14:18701558-18702919	0.210305	0.855593	0.396098	0	0.67964	0.0931411	0	0.207313	0.781302	0.349938	TRUE	0.0945106
L1Md_Gf_dup203:L1Md_Gf:L1:LINE	chr4:85244739-85245154	0.157728	0.285198	0.264065	0.416504	0.16991	0.155235	0.182129	1.15503	1.6828	1.85737	TRUE	0.0972934
L1Md_F2_dup16607:L1Md_F2:L1:LINE	chr4:114485066-114485359	0.473185	0.285198	0.264065	0.277669	0.084955	0.155235	0	0.473858	0.931552	0.753713	TRUE	0.0973475
L1Md_T_dup13511:L1Md_T:L1:LINE	chrX:104622645-104628034	0	0	0	0	0	0.279423	0	0.977332	2.28381	0.592203	TRUE	0.0981012
B2_Mm1t_dup16110:B2_Mm1t:B2:SINE	chr11:103566549-103566707	0.946371	0.570395	0	1.04126	0.16991	0.0931411	0.0607097	1.24388	0.661101	0.215347	TRUE	0.0981567
ORR1A1-int_dup815:ORR1A1-int:ERVL-MaLR:LTR	chr17:87028772-87030549	1.15668	0	0	0	0.16991	0.124188	0	0	1.05175	0.64604	TRUE	0.098872
RLTR1B-int_dup435:RLTR1B-int:ERV1:LTR	chrX:35147508-35148400	0	0.641695	0	0.208252	0	0.31047	0	3.317	0.901502	0	TRUE	0.0994203
B2_Mm2_dup7315:B2_Mm2:B2:SINE	chr2:52077554-52077708	0.105152	0	0.264065	0.347086	0.33982	0	0.0607097	0.266545	0.1803	0.376857	TRUE	0.0995495
L1Md_T_dup22432:L1Md_T:L1:LINE	chr17:70229323-70235641	0	1.06949	0.0660164	0.277669	0.084955	0.217329	0	1.24388	0.751252	0.942142	TRUE	0.0998981
L1_Mur2_dup15739:L1_Mur2:L1:LINE	chr13:66507310-66510096	0	0	0	0.971842	1.18937	0	0.394613	0.710787	1.47245	3.12253	TRUE	0.100365
L1Md_F2_dup23786:L1Md_F2:L1:LINE	chr6:136573761-136574699	0.893795	1.42599	0.594147	0.555338	0	0.31047	0.819581	5.03474	6.25041	3.84932	TRUE	0.10072
MTA_Mm-int_dup458:MTA_Mm-int:ERVL-MaLR:LTR	chr2:175322304-175323381	0	1.14079	0.396098	0.694173	0	0.341517	0.394613	7.01902	1.9232	0.915223	TRUE	0.100733
L1Md_T_dup1620:L1Md_T:L1:LINE	chr1:156848861-156850825	0	0	0	0	0	0.279423	0	1.68812	0.811352	1.23824	TRUE	0.10083
L1Md_A_dup5299:L1Md_A:L1:LINE	chr6:33490421-33493590	0.736066	1.42599	0.0660164	3.12378	0.67964	0.683035	0	1.8362	3.78631	3.49938	TRUE	0.100976
MTA_Mm-int_dup898:MTA_Mm-int:ERVL-MaLR:LTR	chr4:116373116-116374191	0.262881	0.499096	0.264065	0.833008	0.254865	0.434659	0.303549	2.31006	3.24541	4.2531	TRUE	0.10144
L1Md_F2_dup27784:L1Md_F2:L1:LINE	chr8:11793852-11794840	0	0	0	0	0	0.155235	0.182129	0.947716	1.9833	1.53435	TRUE	0.101791
L1Md_F2_dup45523:L1Md_F2:L1:LINE	chr11:30868295-30869569	0.368033	0.285198	0.462115	0.555338	0.33982	0.869317	0	2.51737	4.26711	4.71071	TRUE	0.10188
MurSatRep1_dup1584:MurSatRep1:MurSatRep1:Unknown	chr12:19408568-19408734	0.578338	0.499096	1.38634	4.30387	0.50973	0.217329	0	0.177697	0.510851	2.18039	TRUE	0.102035
B2_Mm1a_dup18158:B2_Mm1a:B2:SINE	chr19:45034140-45034317	1.3144	0	0.660164	0	0	0.0931411	0	0.947716	0.270451	0	TRUE	0.10289
L1Md_F2_dup57711:L1Md_F2:L1:LINE	chr16:11108669-11109284	0.157728	0.712994	0.528131	0.208252	0	0.248376	0	1.03656	0.871452	1.29208	TRUE	0.104282
L1_Mus3_dup22732:L1_Mus3:L1:LINE	chrX:23335769-23336772	0.262881	0.0712994	0	0.0694173	0	0.186282	0.303549	1.89543	2.2237	2.15347	TRUE	0.104854
IAPEz-int_dup4770:IAPEz-int:ERVK:LTR	chr11:6141851-6148283	1.15668	2.56678	0	4.58154	3.48315	0.589894	0	1.80658	2.79466	2.9341	TRUE	0.105086
MMETn-int_dup695:MMETn-int:ERVK:LTR	chr13:8763781-8767065	0	2.99458	0	0	0	0.124188	0	0.503474	1.0818	0	TRUE	0.105152
IAPEY4_I-int_dup368:IAPEY4_I-int:ERVK:LTR	chr12:19049569-19057217	0	0.142599	0	0.902425	0.84955	0	0.121419	0.414626	0.691152	0.430693	TRUE	0.105975
RLTR14-int_dup1147:RLTR14-int:ERV1:LTR	chr14:3823682-3824092	0	0.712994	0	0	0	0.372564	0	0.651555	0.991652	3.06869	TRUE	0.106028
L1Md_F2_dup2266:L1Md_F2:L1:LINE	chr1:86775221-86780139	0.736066	0.356497	0.660164	0.624756	0	0.155235	0	0	1.65275	0.296102	TRUE	0.10673
RLTR4_MM-int_dup209:RLTR4_MM-int:ERV1:LTR	chr8:85126736-85128505	0	0.285198	0	0	0	0.83827	0	5.71591	3.75626	1.0229	TRUE	0.106991
L1_Mm_dup5243:L1_Mm:L1:LINE	chr18:43348966-43350698	0.473185	0.285198	0.330082	0	0	0.031047	0	0.148081	0.240401	0	TRUE	0.107046
IAPEz-int_dup1014:IAPEz-int:ERVK:LTR	chr2:166815822-166817119	1.68244	1.71119	2.24456	1.24951	1.61414	1.42816	0	9.95101	5.31886	2.47649	TRUE	0.107712
L1_Mm_dup5291:L1_Mm:L1:LINE	chr18:70486421-70487078	0.262881	0.712994	0.0660164	0.485921	0.084955	0.124188	0	0.681171	0.841402	0	TRUE	0.10901
L1Md_F2_dup53127:L1Md_F2:L1:LINE	chr14:61434408-61435283	0.210305	0	0.264065	0	0.424775	0.0931411	0	0.651555	0.240401	0.242265	TRUE	0.10967
L1_Mus1_dup2691:L1_Mus1:L1:LINE	chr2:79394656-79394864	0	0.356497	0.198049	0	0	0.0931411	0.0910646	0.829251	0.570951	0.834468	TRUE	0.11004
L1Md_F2_dup21190:L1Md_F2:L1:LINE	chr6:33776059-33781429	0.473185	0.427797	0.594147	0.833008	0.254865	0.0931411	0	0.355393	0.601001	0.16151	TRUE	0.111092
L1_Mus1_dup7115:L1_Mus1:L1:LINE	chr5:21450737-21451791	0.105152	0.142599	0.0660164	0	0.50973	0.31047	0.182129	2.33967	1.8631	1.69586	TRUE	0.111321
L1Md_F2_dup17534:L1Md_F2:L1:LINE	chr5:21430809-21431106	0.157728	0.213898	0	0	0	0	0.273194	1.27349	1.23205	0.753713	TRUE	0.111688
L1Md_F3_dup2918:L1Md_F3:L1:LINE	chr3:129817145-129818208	0	0	0.0660164	0.694173	0	0	0.242839	0.562706	1.17195	1.13057	TRUE	0.112791
L1Md_T_dup10756:L1Md_T:L1:LINE	chr8:63068805-63075860	0	0	0	1.04126	0	0.155235	0	0.325777	0.751252	0.753713	TRUE	0.112838
L1_Mus3_dup46303:L1_Mus3:L1:LINE	chr18:10506223-10508126	0	0.285198	0	0	0	0.186282	0	0.592322	0.540901	1.04982	TRUE	0.113473
L1Md_F2_dup57727:L1Md_F2:L1:LINE	chr16:13300886-13301771	0	0	0	0	0	0.155235	0.121419	1.18464	0.811352	1.23824	TRUE	0.113718
L1Md_F2_dup17735:L1Md_F2:L1:LINE	chr5:34450357-34450679	0.157728	0.356497	0	0.277669	0	0.186282	0	0.770019	0.811352	0.592203	TRUE	0.113911
L1Md_F2_dup56844:L1Md_F2:L1:LINE	chr15:57362029-57362826	0.157728	0	0.660164	0	0	0.155235	0	0.53309	1.0217	0.242265	TRUE	0.114711
L1Md_T_dup13009:L1Md_T:L1:LINE	chrX:72577990-72584052	0.0525761	0.712994	0.990246	1.45776	2.03892	0.620941	0	0.947716	3.18531	3.01485	TRUE	0.115284
L1Md_T_dup11606:L1Md_T:L1:LINE	chr9:55828644-55834138	0.525761	1.14079	1.32033	1.5966	0.254865	0.341517	0	1.18464	2.13355	0.592203	TRUE	0.115829
L1Md_F2_dup42480:L1Md_F2:L1:LINE	chr10:25240095-25240201	0.315457	0.142599	0.0660164	0.0694173	0.084955	0.124188	0.151774	1.06618	1.29215	0.780632	TRUE	0.116508
B1_Mus1_dup7011:B1_Mus1:Alu:SINE	chr2:32727925-32728072	0.210305	0.499096	0.330082	0	0	0.31047	0	1.80658	1.0217	0.699877	TRUE	0.116605
L1MEd_dup2820:L1MEd:L1:LINE	chr15:85738194-85738292	0.0525761	0.213898	0.198049	0.138835	0.084955	0.589894	0.364258	3.93894	3.09516	3.76857	TRUE	0.116989
L1Md_T_dup3965:L1Md_T:L1:LINE	chr3:62122234-62127466	0.157728	0.712994	0	0.76359	0.16991	0	0.212484	0.414626	1.0217	0.96906	TRUE	0.117002
MERVL-int_dup2340:MERVL-int:ERVL:LTR	chr16:72725057-72730382	0	0.926892	0.792196	0	1.18937	0.620941	0	1.80658	3.18531	1.99196	TRUE	0.117673
L1_Mus1_dup10817:L1_Mus1:L1:LINE	chr7:63434886-63435148	0	0	0.0660164	0.138835	0	0	0.182129	0.651555	0.691152	0.699877	TRUE	0.117971
IAPEz-int_dup6726:IAPEz-int:ERVK:LTR	chr17:14867947-14871171	2.15562	0.570395	2.31057	3.67912	0.254865	0.124188	0	0.266545	0.721202	0.403775	TRUE	0.118064
MT-int_dup366:MT-int:ERVL-MaLR:LTR	chr16:32061559-32061906	0.210305	0.499096	0.924229	0.694173	1.10441	1.36607	0	3.55393	5.16861	6.4604	TRUE	0.118912
L1Md_F2_dup5639:L1Md_F2:L1:LINE	chr2:38900788-38902703	0	0	0	0	0	0	0.485678	1.00695	2.52421	1.83045	TRUE	0.119623
L1Md_F2_dup47425:L1Md_F2:L1:LINE	chr12:41172463-41173921	0.998947	0	0.396098	0.694173	0.50973	0.465706	0.516033	3.34662	3.42571	4.03775	TRUE	0.119893
MMSAT4_dup184:MMSAT4:Satellite:Satellite	chr2:177226105-177226231	0.315457	0.427797	0.330082	0.624756	0.50973	0.0931411	0.0607097	0.266545	0.510851	0.915223	TRUE	0.119984
MMSAT4_dup210:MMSAT4:Satellite:Satellite	chr2:177831699-177831907	0.788642	1.35469	1.32033	0.0694173	0	0.279423	0	1.21426	1.7429	0.107673	TRUE	0.120304
MER5A1_dup2745:MER5A1:hAT-Charlie:DNA	chr12:22617731-22617828	0	0.0712994	0	0.138835	0.33982	0.0931411	0	0.385009	0.1202	0.511448	TRUE	0.120819
L2a_dup11085:L2a:L2:LINE	chr8:20150356-20150499	0	2.13898	0.132033	0.416504	3.82297	0.620941	0	1.30311	1.9833	3.44555	TRUE	0.121541
B2_Mm1t_dup23130:B2_Mm1t:B2:SINE	chr19:53341140-53341312	0.525761	0	0	0.138835	0	0.217329	0	1.36234	0.721202	0.269183	TRUE	0.121698
L1Md_T_dup17965:L1Md_T:L1:LINE	chr12:91467424-91474966	0.210305	1.21209	0.660164	0.416504	0.424775	0.217329	0	0.681171	0.661101	0.96906	TRUE	0.123608
L1Md_F2_dup27485:L1Md_F2:L1:LINE	chr7:143676014-143678191	0	0.712994	0.264065	0	0	0.279423	0	0.53309	1.5025	0.915223	TRUE	0.124374
L1MEd_dup92:L1MEd:L1:LINE	chr1:101158500-101158597	0	0.142599	0	0.416504	0	0.0620941	0	0.385009	0.270451	0	TRUE	0.12442
MMVL30-int_dup84:MMVL30-int:ERV1:LTR	chr2:23010332-23013175	0.841218	0.213898	0.132033	0.485921	0	0.83827	0.485678	3.58355	4.35726	5.94895	TRUE	0.125092
MTA_Mm_dup6739:MTA_Mm:ERVL-MaLR:LTR	chr7:130410458-130410853	0.315457	0	0	0	0.084955	0.248376	0	1.36234	0.390651	0.834468	TRUE	0.125865
L1Md_T_dup2777:L1Md_T:L1:LINE	chr2:105845360-105850793	1.41956	0.356497	0.990246	0	0	0.558847	0	1.51042	2.61436	1.69586	TRUE	0.125887
MMETn-int_dup280:MMETn-int:ERVK:LTR	chr7:4057912-4060742	1.26183	0	1.45236	0	0	0	0.0607097	0	0.631051	0	TRUE	0.126108
L1_Mus2_dup9647:L1_Mus2:L1:LINE	chr9:40197751-40199056	0.262881	0.499096	0.198049	0.555338	0	0	0.364258	1.03656	1.202	1.53435	TRUE	0.126499
L1Md_F2_dup57366:L1Md_F2:L1:LINE	chr15:83420292-83420449	0	0.0712994	0	0.485921	0.084955	0.0620941	0.121419	0.562706	0.931552	0.403775	TRUE	0.12666
L1Md_F3_dup5697:L1Md_F3:L1:LINE	chr7:16352899-16354388	0.736066	0.570395	0.792196	1.24951	0.424775	1.08665	0.971355	6.66363	7.30217	6.94493	TRUE	0.128637
L1Md_F2_dup20521:L1Md_F2:L1:LINE	chr6:11981395-11984032	0	0	0.396098	0.694173	0.16991	0.155235	0	0	1.1419	0.430693	TRUE	0.128972
L1Md_F2_dup38627:L1Md_F2:L1:LINE	chrX:129852179-129853049	0	0	0.132033	0.277669	0	0	0.0910646	0.562706	0.300501	0.0538367	TRUE	0.129643
L1Md_F2_dup50836:L1Md_F2:L1:LINE	chr13:73925837-73927412	1.15668	0.570395	0.594147	0.76359	0.084955	1.02455	1.36597	5.47898	10.6978	7.83324	TRUE	0.129939
RMER16-int_dup2570:RMER16-int:ERVK:LTR	chr19:12544580-12545333	0.420609	0.356497	0	0	0.16991	0.0620941	0	0	0.300501	0.32302	TRUE	0.129965
MMSAT4_dup145:MMSAT4:Satellite:Satellite	chr2:176530712-176531430	0	0	1.91447	0	0.254865	0.031047	0	0	0.15025	0.16151	TRUE	0.129965
B2_Mm2_dup46825:B2_Mm2:B2:SINE	chr9:111031847-111032030	0.841218	0.641695	0.990246	0	0.764595	0.31047	0	0.621938	0.901502	1.58818	TRUE	0.130183
ORR1A0-int_dup324:ORR1A0-int:ERVL-MaLR:LTR	chr10:77805056-77806837	0	1.42599	0.462115	0	0	0.558847	0	2.84315	0.991652	1.72277	TRUE	0.131065
MMERGLN-int_dup615:MMERGLN-int:ERV1:LTR	chr10:17318563-17324233	69.4005	110.158	112.558	90.659	69.4082	128.721	167.862	975.111	989.398	966.853	TRUE	0.131767
L1Md_A_dup10013:L1Md_A:L1:LINE	chrY:11683371-11688619	0.210305	0.356497	0.0660164	0.347086	0.33982	0.031047	0	0	0.0901502	0.215347	TRUE	0.132277
L1Md_A_dup10092:L1Md_A:L1:LINE	chrY:16368765-16374013	0.210305	0.356497	0.0660164	0.347086	0.33982	0.031047	0	0	0.0901502	0.215347	TRUE	0.132277
MMSAT4_dup105:MMSAT4:Satellite:Satellite	chr2:175382170-175382888	0.736066	0.0712994	0	0.485921	0.254865	0.031047	0	0	0.0901502	0.215347	TRUE	0.132277
ORR1A0-int_dup149:ORR1A0-int:ERVL-MaLR:LTR	chr5:150527199-150528940	0	0.0712994	0.792196	0	0	0.83827	0	1.89543	2.34391	3.957	TRUE	0.133006
Lx_dup23389:Lx:L1:LINE	chr17:87709544-87711855	0	0	0.0660164	0	0.084955	0.186282	0.182129	0.770019	1.2621	1.56126	TRUE	0.133289
MERVL-int_dup1301:MERVL-int:ERVL:LTR	chr9:108664428-108664767	0.210305	0.142599	0.0660164	0.347086	0.084955	0.186282	0	0.414626	0.751252	0.64604	TRUE	0.13361
L1Md_F2_dup55852:L1Md_F2:L1:LINE	chr15:24310770-24310794	0.210305	0.0712994	0.198049	0.277669	0.084955	0.0620941	0	0.148081	0.240401	0.215347	TRUE	0.133637
L1Md_F2_dup60093:L1Md_F2:L1:LINE	chr17:17308963-17310914	0.315457	0.0712994	0.462115	0.416504	0.50973	0.434659	0.273194	1.00695	3.45576	2.39573	TRUE	0.134059
B2_Mm1a_dup9175:B2_Mm1a:B2:SINE	chr9:65319633-65319791	0	0	0.132033	0.485921	0.16991	0	0.151774	0.414626	0.570951	0.48453	TRUE	0.134095
L1Md_T_dup20839:L1Md_T:L1:LINE	chr15:56885619-56891131	0	0.784294	0.594147	0	0	0.217329	0	0	1.5626	0.538367	TRUE	0.134322
L1Md_F2_dup11976:L1Md_F2:L1:LINE	chr3:106775122-106775487	0.262881	0.427797	0.0660164	0.208252	0.16991	0.155235	0.546387	2.51737	1.7429	2.50341	TRUE	0.134649
MTA_Mm-int_dup595:MTA_Mm-int:ERVL-MaLR:LTR	chr3:31341206-31342302	0	0.784294	0.594147	0.208252	1.01946	0.714082	0	2.22121	1.2621	3.33787	TRUE	0.135717
L1Md_F3_dup11630:L1Md_F3:L1:LINE	chr11:48951259-48956670	0.68349	0	1.45236	1.11068	1.27432	1.14874	0	3.46509	3.78631	3.68781	TRUE	0.136082
MMSAT4_dup1029:MMSAT4:Satellite:Satellite	chr12:22585605-22585827	0.210305	0.142599	0.198049	0.76359	0.67964	0.186282	0	0.0592322	0.1803	1.53435	TRUE	0.136085
MTA_Mm_dup11975:MTA_Mm:ERVL-MaLR:LTR	chr13:66445004-66445398	0.368033	0.356497	0	0.208252	0.254865	0.217329	0	0.9181	0.450751	0.699877	TRUE	0.13613
L1Md_F2_dup5744:L1Md_F2:L1:LINE	chr2:41880359-41881536	0.157728	0	0.198049	0.208252	0.424775	0.0620941	0	0	0.480801	0.107673	TRUE	0.136648
MurSatRep1_dup304:MurSatRep1:MurSatRep1:Unknown	chr2:178033588-178033784	0.368033	0	0.132033	0	1.01946	0	0.303549	1.39196	0.781302	0.699877	TRUE	0.136797
L1_Mus3_dup37418:L1_Mus3:L1:LINE	chr13:17760254-17760909	0.368033	0.356497	0.264065	0.694173	0.084955	0.620941	0.182129	2.54699	2.25375	2.79951	TRUE	0.136811
RLTR31D_MM_dup6534:RLTR31D_MM:ERVK:LTR	chr14:4729104-4729195	0.315457	0.712994	0	0.347086	0.33982	0.124188	0	0.592322	0.390651	0.188428	TRUE	0.137206
L1Md_F3_dup2373:L1Md_F3:L1:LINE	chr3:55971314-55977619	0	0	0.0660164	0.416504	0	0.341517	0	1.24388	0.540901	1.39975	TRUE	0.138573
MMSAT4_dup93:MMSAT4:Satellite:Satellite	chr2:175088227-175088771	1.52471	0.926892	0	1.11068	1.35928	0.155235	0.394613	1.39196	2.13355	1.53435	TRUE	0.140157
L1Md_F2_dup5456:L1Md_F2:L1:LINE	chr2:20604559-20605163	0.420609	0	0.396098	0.277669	0.67964	0.124188	0.576742	1.80658	2.43406	2.2073	TRUE	0.140198
L1Md_T_dup2828:L1Md_T:L1:LINE	chr2:110157146-110163240	0	0.712994	0	0.694173	0	0.0620941	0	0	0.570951	0	TRUE	0.140253
L1Md_T_dup22573:L1Md_T:L1:LINE	chr17:91572948-91578045	0.315457	0.427797	0.462115	0	0	0	0.151774	0.562706	0.601001	0.215347	TRUE	0.141694
IAPEz-int_dup3124:IAPEz-int:ERVK:LTR	chr8:22551539-22557922	0	0.427797	0.594147	0	0.67964	0.031047	0	0	0.1202	0.16151	TRUE	0.141862
L1_Mm_dup4883:L1_Mm:L1:LINE	chr16:43150189-43151825	0.420609	0.641695	0.198049	0.208252	0	0.217329	0	0.385009	0.570951	0.995979	TRUE	0.14311
MT-int_dup233:MT-int:ERVL-MaLR:LTR	chr9:108665839-108666088	0.736066	0.499096	1.18829	0.277669	0.594685	0.372564	1.45703	6.0713	5.43906	4.89914	TRUE	0.143281
B2_Mm1a_dup15436:B2_Mm1a:B2:SINE	chr15:84917549-84917741	0.368033	0	0.132033	0	1.01946	0	0.242839	0.473858	1.6227	0.080755	TRUE	0.14332
L1Md_F2_dup55218:L1Md_F2:L1:LINE	chr15:8253516-8254505	0	0	0.264065	0.624756	0.254865	0.496753	0.910646	4.29434	4.86811	3.44555	TRUE	0.143426
B2_Mm1t_dup10652:B2_Mm1t:B2:SINE	chr8:105807165-105807348	0.788642	0.570395	0	0	0.33982	0	0.0303549	0	0.270451	0	TRUE	0.144097
L1Md_T_dup11073:L1Md_T:L1:LINE	chr8:99466277-99472357	0.68349	0	0	0.555338	0	0.465706	0	0.740403	2.46411	0.915223	TRUE	0.144981
MurSatRep1_dup1958:MurSatRep1:MurSatRep1:Unknown	chr13:62518503-62518742	0.736066	0.499096	0.72618	0.694173	0.33982	0	0.242839	0.888483	0.721202	0.538367	TRUE	0.144989
L1Md_T_dup23610:L1Md_T:L1:LINE	chr19:53642676-53643091	0.315457	0.356497	0.264065	0.138835	0.594685	0.0931411	0	0.177697	0.420701	0.215347	TRUE	0.146532
L1Md_A_dup523:L1Md_A:L1:LINE	chr1:68268129-68273469	0	0	0.198049	0.416504	0.50973	0.248376	0	0.177697	0.781302	1.18441	TRUE	0.14808
L1Md_F2_dup27157:L1Md_F2:L1:LINE	chr7:111680404-111681400	0	0	0.198049	0	0	0.279423	0	0.681171	0.691152	1.0229	TRUE	0.148928
L1Md_T_dup5746:L1Md_T:L1:LINE	chr4:76703608-76704119	0	0.285198	0.0660164	0.347086	0.254865	0.0931411	0	0.0592322	0.360601	0.376857	TRUE	0.149201
L1Md_F2_dup47874:L1Md_F2:L1:LINE	chr12:51933036-51934292	0	0.570395	0	0	0	0.496753	0.546387	3.61317	1.9833	3.31096	TRUE	0.149417
B1_Mus2_dup8263:B1_Mus2:Alu:SINE	chr2:147071765-147071909	0.210305	0	0	0	0.16991	0	0.151774	0.473858	0.631051	0.188428	TRUE	0.149679
L1Md_F3_dup6801:L1Md_F3:L1:LINE	chr8:69782761-69786765	0.105152	0.356497	0.528131	0	0	0.217329	0	0	0.721202	1.13057	TRUE	0.149692
L1Md_T_dup23036:L1Md_T:L1:LINE	chr18:53204428-53204643	0.315457	0	0.132033	0.138835	0.084955	0.217329	0.242839	1.39196	1.17195	1.34592	TRUE	0.150052
L1Md_T_dup1991:L1Md_T:L1:LINE	chr2:15601901-15602896	0	0.285198	0	0.624756	0.16991	0	0.182129	0.740403	0.420701	0.376857	TRUE	0.15084
ORR1A0-int_dup93:ORR1A0-int:ERVL-MaLR:LTR	chr3:157983799-157985581	0.210305	0	0	0.624756	0.254865	0.372564	0	0.799635	1.47245	0.861387	TRUE	0.151354
L1_Mm_dup167:L1_Mm:L1:LINE	chr1:87903636-87905114	0.788642	0.712994	0.660164	0.694173	0.33982	1.14874	0	1.74735	3.99666	3.90316	TRUE	0.151545
IAPEz-int_dup1227:IAPEz-int:ERVK:LTR	chr3:60493478-60494749	0.105152	0.926892	2.24456	1.87427	0.84955	0.155235	1.79094	7.07825	3.57596	5.67977	TRUE	0.151624
L1Md_T_dup4486:L1Md_T:L1:LINE	chr3:113186360-113189486	0	0.142599	0.0660164	1.04126	0.254865	0.124188	0.0910646	0.681171	0.360601	0.753713	TRUE	0.152419
RMER16-int_dup1761:RMER16-int:ERVK:LTR	chr11:41220093-41220815	0	2.56678	8.4501	8.33008	5.35216	0.031047	0.364258	1.89543	1.23205	0.16151	TRUE	0.152747
L1Md_F2_dup1628:L1Md_F2:L1:LINE	chr1:55551441-55551833	0.210305	0.213898	0.0660164	0	0	0	0.212484	0.947716	0	0.80755	TRUE	0.153678
L1_Mur1_dup6257:L1_Mur1:L1:LINE	chr14:7015953-7016318	0	1.42599	0	2.22135	0	0.341517	0.637452	1.54004	2.31386	4.22618	TRUE	0.153789
IAPEz-int_dup6338:IAPEz-int:ERVK:LTR	chr15:73377080-73377720	0	0	0.660164	0	0	0.217329	0	0.621938	0.0901502	1.07673	TRUE	0.154148
L1Md_T_dup20822:L1Md_T:L1:LINE	chr15:55670076-55676170	0.368033	0.499096	0.990246	1.94368	0	0.31047	0	1.03656	0.781302	0.726795	TRUE	0.154701
L1Md_F2_dup44457:L1Md_F2:L1:LINE	chr10:108215900-108221124	1.41956	1.56859	0.660164	0.902425	1.10441	0.341517	0	0.177697	1.89315	0.726795	TRUE	0.15477
IAPLTR1_Mm_dup905:IAPLTR1_Mm:ERVK:LTR	chrY:3335316-3335680	0	0	0.264065	0	0	0	0.212484	0.799635	0.240401	0.699877	TRUE	0.154824
ORR1A1-int_dup50:ORR1A1-int:ERVL-MaLR:LTR	chr1:135446434-135448145	0.368033	0.784294	0	0	0	0.589894	0	1.45119	2.07345	1.29208	TRUE	0.155193
MTA_Mm_dup3143:MTA_Mm:ERVL-MaLR:LTR	chr3:104808983-104809378	0	0.641695	0	0	0	0.0620941	0	0.503474	0	0	TRUE	0.156116
L1_Mur2_dup15727:L1_Mur2:L1:LINE	chr13:66258153-66259019	0.315457	0.213898	0.462115	1.18009	0	0.31047	0	0	0.871452	1.64202	TRUE	0.15632
MMSAT4_dup274:MMSAT4:Satellite:Satellite	chr4:147512487-147515105	0.68349	0.712994	1.32033	0.971842	0.67964	0.0931411	0	0.0592322	0.691152	0	TRUE	0.156963
MTA_Mm-int_dup1342:MTA_Mm-int:ERVL-MaLR:LTR	chr7:74333236-74334331	0	0.499096	0	0	0	0.589894	0	1.62889	0.931552	2.18039	TRUE	0.157286
MTA_Mm_dup14668:MTA_Mm:ERVL-MaLR:LTR	chr17:87979486-87979877	0.105152	0.213898	0.198049	0	0	0.124188	0	0.444242	0.390651	0.16151	TRUE	0.157508
ORR1A0-int_dup128:ORR1A0-int:ERVL-MaLR:LTR	chr5:33913697-33915459	0.630914	0.0712994	0.924229	0.208252	1.01946	0.807223	0	1.89543	1.77295	2.79951	TRUE	0.157687
RLTR10-int_dup1826:RLTR10-int:ERVK:LTR	chr12:19047557-19048169	0.630914	0.712994	0.462115	0	0.84955	0.83827	0.728517	4.56088	3.84641	4.11851	TRUE	0.157985
MERVL-int_dup717:MERVL-int:ERVL:LTR	chr5:33904746-33907135	0	1.14079	0.528131	0	2.71856	2.01806	0	4.53127	5.34891	6.24505	TRUE	0.158053
IAPEz-int_dup4980:IAPEz-int:ERVK:LTR	chr11:108650303-108651561	0.788642	0.998192	0.396098	0	0.67964	0.496753	0	1.39196	1.6227	0.915223	TRUE	0.159385
MTA_Mm-int_dup506:MTA_Mm-int:ERVL-MaLR:LTR	chr2:176914521-176915606	1.15668	0.142599	1.05626	0.138835	0	0.155235	0.273194	0.829251	0.540901	2.01888	TRUE	0.159399
L1Md_A_dup13361:L1Md_A:L1:LINE	chr13:36248384-36249377	0	0	0	0.0694173	0.084955	0	0.455323	1.18464	1.1419	1.26516	TRUE	0.159774
L1Md_A_dup9492:L1Md_A:L1:LINE	chrX:130013782-130014863	0.315457	0.213898	0	0.277669	0	0.465706	0	0.621938	2.07345	0.96906	TRUE	0.160109
MT-int_dup281:MT-int:ERVL-MaLR:LTR	chr11:75470098-75470503	0	0.427797	0.132033	0	0.254865	0.403612	0	1.15503	1.47245	0.538367	TRUE	0.160534
L1Md_F2_dup28384:L1Md_F2:L1:LINE	chr8:41355533-41356264	0	0.142599	0.462115	0.347086	0	0.31047	0	0.888483	0.601001	0.942142	TRUE	0.160736
B2_Mm1a_dup1303:B2_Mm1a:B2:SINE	chr2:31732364-31732523	0	0	0.462115	0.416504	0	0	0.121419	0.53309	0.390651	0.0269183	TRUE	0.160779
L1Md_F2_dup13624:L1Md_F2:L1:LINE	chr4:11300862-11303075	0.788642	0.998192	0.396098	0.347086	0.254865	0.279423	0.819581	1.89543	3.87646	2.82643	TRUE	0.16088
L1_Mus1_dup12476:L1_Mus1:L1:LINE	chr8:106792328-106793336	0.0525761	0	0.396098	0.0694173	0.084955	0.217329	0	0.473858	0.901502	0.32302	TRUE	0.161034
RLTR6-int_dup1024:RLTR6-int:ERV1:LTR	chr13:111731796-111736819	0	0	0	0.555338	0	0.155235	0	0.355393	0.480801	0.376857	TRUE	0.161043
L1_Mus2_dup15337:L1_Mus2:L1:LINE	chr11:33354927-33356765	0.368033	0.0712994	0.132033	0	0	0	0.182129	0.296161	0.480801	0.64604	TRUE	0.161063
L1Md_T_dup2670:L1Md_T:L1:LINE	chr2:96954688-96961006	0	0	1.25431	1.11068	0	0	0.182129	0	0.21035	1.21133	TRUE	0.161189
L1Md_F2_dup53373:L1Md_F2:L1:LINE	chr14:78967995-78968400	0.157728	0.356497	0.264065	0	0.16991	0.155235	0	0.0888483	0.420701	0.699877	TRUE	0.161448
L1Md_F2_dup46448:L1Md_F2:L1:LINE	chr11:105224276-105226218	1.99789	1.21209	1.45236	0	2.29378	2.45272	2.15519	9.0033	13.6728	13.0554	TRUE	0.162085
RLTR10-int_dup962:RLTR10-int:ERVK:LTR	chr7:78899432-78901371	5.46792	5.41876	7.78993	0	7.47604	7.48234	0	20.4055	20.1636	16.797	TRUE	0.163633
L1Md_F_dup3190:L1Md_F:L1:LINE	chr12:50402642-50407459	0.420609	0	0	1.04126	0	0.186282	0	0.207313	0.540901	0.672958	TRUE	0.164309
L1Md_F2_dup42601:L1Md_F2:L1:LINE	chr10:31049793-31050059	0.157728	0.285198	0.198049	0	0.16991	0.124188	0.212484	0.740403	0.721202	1.10365	TRUE	0.164484
ORR1A0_dup1628:ORR1A0:ERVL-MaLR:LTR	chr13:62112043-62112387	0.630914	0	0.594147	0.416504	0.424775	0.186282	0	0.977332	0.360601	0.080755	TRUE	0.16455
L1Md_T_dup12808:L1Md_T:L1:LINE	chrX:59849639-59854679	1.15668	1.63989	1.51838	0.971842	0.424775	0.248376	0	0.118464	1.77295	0	TRUE	0.164562
L1Md_F2_dup63276:L1Md_F2:L1:LINE	chr18:77076623-77077511	2.15562	1.92508	2.31057	2.29077	2.37874	2.0491	3.12655	12.4092	15.4457	11.4672	TRUE	0.16488
MTA_Mm-int_dup2202:MTA_Mm-int:ERVL-MaLR:LTR	chr12:36679496-36680589	2.57623	1.49729	0	1.24951	1.52919	1.73863	0	2.07313	2.94491	8.18317	TRUE	0.164965
B2_Mm1a_dup8612:B2_Mm1a:B2:SINE	chr8:123023485-123023642	0.420609	0	0.528131	0	0	0.031047	0	0.148081	0.0601001	0.0269183	TRUE	0.165338
L1_Mm_dup697:L1_Mm:L1:LINE	chr3:8519372-8519572	0.210305	0	0.264065	0.485921	0.16991	0	0.0303549	0	0.1202	0.107673	TRUE	0.166537
B2_Mm1a_dup5201:B2_Mm1a:B2:SINE	chr5:114186478-114186667	0	0.0712994	0	0.485921	0	0	0.0910646	0.621938	0.0601001	0	TRUE	0.166859
L1Md_F2_dup29721:L1Md_F2:L1:LINE	chr8:90924617-90924867	0.157728	0	0.198049	0.277669	0.16991	0	0.0910646	0.177697	0.1803	0.32302	TRUE	0.167068
RLTR10-int_dup1066:RLTR10-int:ERVK:LTR	chr8:24760607-24761568	0.420609	0	0	0.833008	0	0.0931411	0	0.236929	0	0.457612	TRUE	0.167469
MMSAT4_dup925:MMSAT4:Satellite:Satellite	chr12:18026777-18026999	0.578338	0.356497	1.51838	3.67912	0.84955	0.124188	0	0.0888483	0.540901	0.296102	TRUE	0.1675
B1_Mus1_dup59849:B1_Mus1:Alu:SINE	chr10:88776938-88777084	0	0	0	0	0.16991	0.434659	0	1.30311	0.991652	0.942142	TRUE	0.167654
MTA_Mm-int_dup966:MTA_Mm-int:ERVL-MaLR:LTR	chr5:23583812-23584902	0.788642	0.855593	1.18829	0.0694173	0.084955	1.95596	0	5.3309	4.17696	5.03373	TRUE	0.167889
MTA_Mm_dup4337:MTA_Mm:ERVL-MaLR:LTR	chr4:147372555-147372947	1.26183	0.926892	0	0.277669	0.764595	0.248376	0	0	1.17195	0.672958	TRUE	0.168013
L1_Mur1_dup6246:L1_Mur1:L1:LINE	chr14:6415609-6415974	0	1.42599	1.91447	0.694173	4.41766	1.27293	0.637452	5.03474	2.91486	6.21814	TRUE	0.168233
L1_Mur1_dup6251:L1_Mur1:L1:LINE	chr14:6745522-6745887	0	1.42599	1.91447	0.694173	4.41766	1.27293	0.637452	5.03474	2.91486	6.21814	TRUE	0.168233
L1Md_T_dup4902:L1Md_T:L1:LINE	chr4:5927554-5932765	0.578338	0	0.396098	0.555338	0	0.217329	0	0	0.991652	0.619122	TRUE	0.168319
L1Md_F2_dup61144:L1Md_F2:L1:LINE	chr17:63982718-63986329	0.473185	0	0	1.04126	0	0.186282	0	0	0.961602	0.403775	TRUE	0.169883
L1Md_T_dup16419:L1Md_T:L1:LINE	chr10:105809199-105814421	0.210305	0	0.528131	0	0	0.155235	0	0.53309	0.601001	0	TRUE	0.170346
MMSAT4_dup87:MMSAT4:Satellite:Satellite	chr2:175018232-175018801	0.315457	0.499096	1.51838	2.77669	0.254865	0.0931411	0	0	0.570951	0.107673	TRUE	0.170726
L1Md_T_dup1411:L1Md_T:L1:LINE	chr1:139907335-139913004	1.52471	0.570395	0.924229	0.624756	0	0	0.758871	0.799635	3.18531	1.53435	TRUE	0.170979
MMSAT4_dup1457:MMSAT4:Satellite:Satellite	chr17:17265697-17265837	0	0	0.330082	0.347086	0.33982	0.031047	0	0.0296161	0.0601001	0.134592	TRUE	0.171924
MTA_Mm_dup10872:MTA_Mm:ERVL-MaLR:LTR	chr11:121611951-121612331	0.736066	0	0	0	0.84955	0.496753	0	1.59927	1.1419	0.834468	TRUE	0.172453
B2_Mm1a_dup11232:B2_Mm1a:B2:SINE	chr10:128363919-128364098	0	0.213898	0.396098	0	0.33982	0.124188	0	0.236929	0.0901502	0.565285	TRUE	0.1727
L1Md_T_dup17916:L1Md_T:L1:LINE	chr12:78644603-78645232	0.262881	0.213898	0	0	0.424775	0	0.182129	0.562706	0.1803	0.565285	TRUE	0.172745
L1Md_A_dup16425:L1Md_A:L1:LINE	chr18:63264212-63264568	0	0.142599	0	0.208252	0.50973	0.217329	0.242839	1.03656	1.3222	0.942142	TRUE	0.172945
L1Md_T_dup16262:L1Md_T:L1:LINE	chr10:86402257-86403527	0.420609	0.213898	0.462115	0	0	0.217329	0	0.414626	0.601001	0.538367	TRUE	0.173402
L1Md_F3_dup11421:L1Md_F3:L1:LINE	chr10:130484516-130485380	0.210305	0.142599	0.396098	0	0.254865	0.341517	0	1.03656	1.05175	0.349938	TRUE	0.173622
L1Md_T_dup4028:L1Md_T:L1:LINE	chr3:66902414-66907619	0	0	0.462115	0	0.254865	0.341517	0	0	1.0818	1.34592	TRUE	0.174244
B2_Mm1a_dup3387:B2_Mm1a:B2:SINE	chr4:48614700-48614892	0.0525761	0	0.594147	0	0.424775	0	0.242839	0.681171	0.691152	0.349938	TRUE	0.174577
ORR1A0-int_dup120:ORR1A0-int:ERVL-MaLR:LTR	chr4:113565036-113565566	0.525761	0.712994	0	0	0.33982	0.248376	0	0.829251	0.931552	0	TRUE	0.174637
L1Md_F2_dup21256:L1Md_F2:L1:LINE	chr6:38221914-38222518	0	0	0.0660164	0	0	0.279423	0	0.947716	0.450751	0.565285	TRUE	0.175894
MT2_Mm_dup776:MT2_Mm:ERVL:LTR	chr5:94377034-94377526	0	0.213898	0.132033	0	0	0.0931411	0.242839	1.00695	1.35225	0	TRUE	0.176018
MMSAT4_dup183:MMSAT4:Satellite:Satellite	chr2:177225856-177226011	0.157728	0	0.72618	0.347086	0.254865	0.124188	0	0.266545	0.300501	0.296102	TRUE	0.177508
L1Md_T_dup14224:L1Md_T:L1:LINE	chrX:156064012-156070119	0.420609	0	0.330082	1.66602	0.16991	0	0.424968	0.681171	1.3823	0.888305	TRUE	0.177601
L1_Mus1_dup7151:L1_Mus1:L1:LINE	chr5:25320973-25323444	0.315457	0	0.264065	0	0	0.217329	0	0.53309	0.811352	0.16151	TRUE	0.17795
MTA_Mm-int_dup926:MTA_Mm-int:ERVL-MaLR:LTR	chr4:147371460-147372554	0.0525761	0	0.528131	0.347086	0.16991	0.279423	0	0	1.2621	0.672958	TRUE	0.178037
L1Md_F2_dup16391:L1Md_F2:L1:LINE	chr4:103363885-103364798	0	0.213898	0	0	0	0.186282	0.182129	0.681171	1.35225	0.511448	TRUE	0.178408
ORR1A0-int_dup83:ORR1A0-int:ERVL-MaLR:LTR	chr3:98490190-98491981	0.473185	0.356497	0	0.277669	0.084955	0.217329	0	0.236929	0.751252	0.511448	TRUE	0.178566
ORR1A0-int_dup86:ORR1A0-int:ERVL-MaLR:LTR	chr3:98543651-98545442	0.473185	0.356497	0	0.277669	0.084955	0.217329	0	0.236929	0.751252	0.511448	TRUE	0.178566
L1_Mm_dup4000:L1_Mm:L1:LINE	chr12:20629648-20630691	0.157728	0.213898	0.264065	0.555338	0.084955	0.031047	0.182129	0.681171	0.540901	0.242265	TRUE	0.17923
ORR1A4-int_dup1011:ORR1A4-int:ERVL-MaLR:LTR	chr13:66427071-66428395	0.262881	0	0	0	0	0.403612	0	0.444242	0.330551	1.99196	TRUE	0.179534
MuLV-int_dup74:MuLV-int:ERV1:LTR	chr5:23701114-23708710	2.57623	2.28158	3.36683	2.42961	4.41766	3.1047	1.15348	7.61134	12.5309	9.04456	TRUE	0.179549
RLTR10-int_dup1862:RLTR10-int:ERVK:LTR	chr12:36099810-36101731	1.15668	1.14079	0	0.76359	0	1.33502	0	3.43547	2.82471	2.88026	TRUE	0.179713
L1_Mus3_dup39142:L1_Mus3:L1:LINE	chr14:3958184-3960030	2.4185	4.77706	7.45985	6.66406	2.97342	1.42816	1.42668	6.10092	3.78631	9.63677	TRUE	0.17988
L1Md_Gf_dup31:L1Md_Gf:L1:LINE	chr1:85047308-85051258	0	0.0712994	0	0	0.594685	0.31047	0	0.325777	0.961602	0.834468	TRUE	0.179979
MTA_Mm_dup4043:MTA_Mm:ERVL-MaLR:LTR	chr4:89004328-89004510	0	0	0.264065	0.0694173	0.16991	0.124188	0	0.444242	0	0.403775	TRUE	0.180105
RLTR4_MM-int_dup208:RLTR4_MM-int:ERV1:LTR	chr8:85126429-85126733	0.630914	0.855593	0.594147	0.416504	1.27432	0.0620941	0.758871	1.98428	2.67446	0.942142	TRUE	0.180239
ID_B1_dup82141:ID_B1:B4:SINE	chr12:19548016-19548132	0.105152	0.0712994	0.132033	0.0694173	0	0	0.182129	0.621938	0.240401	0.376857	TRUE	0.180637
L1_Mm_dup2966:L1_Mm:L1:LINE	chrX:96310031-96310524	0.0525761	0.285198	0.462115	0.485921	0.50973	0.217329	0	0.236929	0.781302	0.457612	TRUE	0.180923
L1_Mus1_dup15470:L1_Mus1:L1:LINE	chrX:103309407-103310056	0.157728	0.641695	0	0.277669	0.16991	0.745129	0.212484	1.21426	2.34391	2.9341	TRUE	0.181167
L1Md_T_dup5847:L1Md_T:L1:LINE	chr4:82041175-82047025	0	0.926892	0	0.833008	0	0.124188	0.212484	0.829251	0.871452	0.565285	TRUE	0.182248
B1_Mus1_dup92817:B1_Mus1:Alu:SINE	chr19:5801969-5802116	3.20715	2.56678	2.17854	2.91553	3.05838	12.1704	19.336	92.6688	70.2571	48.6953	TRUE	0.182554
IAPEz-int_dup4762:IAPEz-int:ERVK:LTR	chr11:116391049-116394317	5.36277	3.13717	5.08326	0	4.16279	0.683035	0	1.39196	1.89315	1.29208	TRUE	0.182899
L1Md_T_dup18478:L1Md_T:L1:LINE	chr13:36184301-36189465	0.946371	0.784294	0	0.971842	0.16991	0.186282	0	0.0592322	1.0217	0.16151	TRUE	0.183606
B2_Mm1a_dup14241:B2_Mm1a:B2:SINE	chr13:104108054-104108244	1.62986	0.926892	1.05626	1.66602	1.35928	0	0.303549	0.710787	1.29215	0	TRUE	0.185221
URR1A_dup13918:URR1A:hAT-Charlie:DNA	chr14:7308450-7308671	3.68033	2.70938	6.00749	4.30387	0.934505	0.776176	0.941001	3.79086	3.99666	3.49938	TRUE	0.185806
L1Md_F2_dup63839:L1Md_F2:L1:LINE	chr19:11797941-11798614	0	0.285198	0	0.138835	0.16991	0.0620941	0.151774	0.266545	0.570951	0.565285	TRUE	0.186125
L1_Mm_dup2553:L1_Mm:L1:LINE	chr9:111133862-111135166	0.210305	0.356497	0	0	0.084955	0.217329	0	0.148081	0.601001	0.672958	TRUE	0.186492
IAPLTR1_Mm_dup511:IAPLTR1_Mm:ERVK:LTR	chr6:28924175-28924529	0	0.570395	0	0.138835	1.27432	0	0.0910646	0.355393	0.240401	0	TRUE	0.186508
RMER10A_dup542:RMER10A:ERVL:LTR	chr2:175427115-175427284	0.420609	0.285198	0.198049	0.347086	0.84955	0.0931411	0	0	0.15025	0.457612	TRUE	0.186887
L1_Mm_dup2333:L1_Mm:L1:LINE	chr8:66258955-66259947	0.525761	0	0.198049	0.277669	0.594685	0	0.151774	0.207313	0.510851	0.269183	TRUE	0.187374
L1Md_F2_dup48591:L1Md_F2:L1:LINE	chr12:81391397-81395246	0.946371	0.784294	1.12228	0.76359	0.67964	0.279423	0	0.236929	0.961602	0.619122	TRUE	0.187383
L1Md_T_dup6617:L1Md_T:L1:LINE	chr5:29349521-29356677	0	0.855593	0	0.347086	0	0	0.485678	0.770019	1.47245	0.915223	TRUE	0.187462
B2_Mm2_dup21967:B2_Mm2:B2:SINE	chr4:152059850-152060035	0.262881	0.213898	0.660164	0.485921	0.424775	0.0620941	0.0910646	0.207313	0.570951	0.215347	TRUE	0.187794
B2_Mm1a_dup4567:B2_Mm1a:B2:SINE	chr4:155667712-155667898	0	0.142599	0	0.277669	0	0.124188	0	0.562706	0.21035	0.0269183	TRUE	0.188878
L1Md_T_dup9061:L1Md_T:L1:LINE	chr7:18113293-18114288	0	0	0	0.416504	0.16991	0.217329	0	0.385009	0.691152	0.32302	TRUE	0.188963
IAPEz-int_dup745:IAPEz-int:ERVK:LTR	chr2:84505545-84506816	2.47108	0.926892	2.24456	1.87427	0.84955	0.155235	1.79094	4.44242	4.74791	3.28404	TRUE	0.189641
MMVL30-int_dup31:MMVL30-int:ERV1:LTR	chr1:53693040-53695340	0	0	0	0.416504	0.33982	1.02455	0.516033	3.10969	2.79466	3.957	TRUE	0.189848
L1_Mm_dup5368:L1_Mm:L1:LINE	chr19:28563474-28564021	0.210305	0.356497	0.0660164	0	0.254865	0.124188	0	0.385009	0.300501	0.107673	TRUE	0.190188
MTA_Mm-int_dup2120:MTA_Mm-int:ERVL-MaLR:LTR	chr11:77255542-77256641	0	0.213898	0.132033	0.277669	0	0.372564	0	0.710787	0.510851	1.15749	TRUE	0.190215
L1Md_T_dup17077:L1Md_T:L1:LINE	chr11:81138092-81139941	0.105152	0.142599	0.0660164	0.416504	0.084955	0.155235	0	0.177697	0.540901	0.269183	TRUE	0.190764
ORR1A0-int_dup81:ORR1A0-int:ERVL-MaLR:LTR	chr3:98485914-98487705	0	0.356497	0	0.277669	0.084955	0.217329	0	0.236929	0.631051	0.511448	TRUE	0.191151
ORR1A0-int_dup82:ORR1A0-int:ERVL-MaLR:LTR	chr3:98488052-98489843	0	0.356497	0	0.277669	0.084955	0.217329	0	0.236929	0.631051	0.511448	TRUE	0.191151
ORR1A0-int_dup84:ORR1A0-int:ERVL-MaLR:LTR	chr3:98539375-98541166	0	0.356497	0	0.277669	0.084955	0.217329	0	0.236929	0.631051	0.511448	TRUE	0.191151
ORR1A0-int_dup85:ORR1A0-int:ERVL-MaLR:LTR	chr3:98541513-98543304	0	0.356497	0	0.277669	0.084955	0.217329	0	0.236929	0.631051	0.511448	TRUE	0.191151
L1Md_F2_dup26853:L1Md_F2:L1:LINE	chr7:99959255-99959987	0.473185	0	0.792196	1.11068	0.50973	1.14874	0	2.04351	1.77295	3.47247	TRUE	0.191201
L1Md_T_dup20569:L1Md_T:L1:LINE	chr15:30580047-30584464	0	0.356497	0	0.416504	0.33982	0	0.0607097	0.385009	0	0	TRUE	0.191282
L1_Mus1_dup19367:L1_Mus1:L1:LINE	chr11:115575224-115577662	1.94532	0.784294	0.594147	0.277669	1.01946	1.30398	0.607097	1.62889	5.73956	4.71071	TRUE	0.191801
L1Md_F2_dup29350:L1Md_F2:L1:LINE	chr8:72406555-72407416	0.736066	0.285198	0.264065	0.555338	0.67964	0.372564	0	0.799635	0.931552	0.619122	TRUE	0.192099
L1Md_T_dup10302:L1Md_T:L1:LINE	chr8:25965894-25966563	0	0	0	0	0.424775	0	0.303549	0.799635	0.540901	0.565285	TRUE	0.19284
RLTR13D5_dup83:RLTR13D5:ERVK:LTR	chr2:26890670-26890894	0.262881	0.285198	0.528131	0.555338	0.084955	0.0620941	0	0	0.330551	0.0538367	TRUE	0.195048
B2_Mm1a_dup8170:B2_Mm1a:B2:SINE	chr8:73018910-73019097	1.47213	0.213898	0	0.76359	1.01946	0.217329	0	0.681171	0.15025	0.511448	TRUE	0.195339
L1Md_T_dup19399:L1Md_T:L1:LINE	chr14:35475672-35476327	0.262881	1.28339	0.198049	0.416504	0.254865	0.683035	0	1.62889	1.47245	1.10365	TRUE	0.195916
L1_Mur1_dup6190:L1_Mur1:L1:LINE	chr14:4030223-4030588	0	0.784294	0	2.22135	0	0.341517	0.637452	1.06618	2.31386	2.638	TRUE	0.196147
MMVL30-int_dup700:MMVL30-int:ERV1:LTR	chr12:24081118-24083953	5.67822	4.20667	6.33757	5.90047	5.0973	6.95454	6.19239	23.0413	29.5693	28.0758	TRUE	0.196405
MTA_Mm-int_dup255:MTA_Mm-int:ERVL-MaLR:LTR	chr1:175890095-175891195	0.525761	0.142599	0	0.277669	0.254865	0.869317	0.485678	2.932	2.79466	2.58416	TRUE	0.196503
L1Md_T_dup19132:L1Md_T:L1:LINE	chr14:44298965-44305114	0	0.356497	1.78244	1.24951	0.934505	1.02455	0.151774	0.473858	2.82471	3.87624	TRUE	0.197386
L1Md_A_dup4158:L1Md_A:L1:LINE	chr4:112421224-112427310	0	0.142599	0	1.45776	0.594685	0.465706	0	0.473858	0.991652	1.37284	TRUE	0.197506
MT2_Mm_dup667:MT2_Mm:ERVL:LTR	chr4:118496983-118497474	0.630914	0.499096	0.660164	0.971842	0.594685	0.31047	0.546387	1.15503	1.29215	2.71875	TRUE	0.199232
L1Md_F2_dup49785:L1Md_F2:L1:LINE	chr13:12443989-12444977	0	0.499096	0.132033	0	0	0	0.182129	0.385009	0.360601	0.349938	TRUE	0.199595
L1Md_F2_dup61979:L1Md_F2:L1:LINE	chr18:12780279-12781214	0.368033	0.570395	0.198049	0.416504	0	0.465706	0.607097	1.30311	2.31386	2.79951	TRUE	0.200507
RLTR10-int_dup2131:RLTR10-int:ERVK:LTR	chr14:86913871-86914131	0.0525761	0.499096	0	0	0.33982	0.620941	1.36597	5.36052	2.40401	4.09159	TRUE	0.200881
L1Md_T_dup8606:L1Md_T:L1:LINE	chr6:111391351-111396483	0	0.213898	0.330082	0.76359	0	0.186282	0	0.177697	0.661101	0.269183	TRUE	0.2014
L1Md_T_dup15783:L1Md_T:L1:LINE	chr10:32039728-32045991	0.105152	0.427797	0	0.347086	0.50973	0.248376	0	0	0.721202	0.753713	TRUE	0.201661
MurSatRep1_dup261:MurSatRep1:MurSatRep1:Unknown	chr2:177225475-177225729	1.15668	1.14079	2.11252	2.84611	1.44423	0.558847	0.182129	1.80658	1.2621	1.319	TRUE	0.202116
L1Md_F2_dup47954:L1Md_F2:L1:LINE	chr12:57260626-57262512	0.788642	0.427797	0.330082	0.76359	0.594685	0.341517	0.242839	0.829251	1.6828	0.942142	TRUE	0.202399
MTA_Mm_dup2313:MTA_Mm:ERVL-MaLR:LTR	chr2:176533231-176533372	0.578338	0.213898	0.528131	0.694173	0.16991	0.155235	0.121419	0	0.1803	1.45359	TRUE	0.202542
L1Md_F2_dup8163:L1Md_F2:L1:LINE	chr2:136941014-136941993	0	0	0	0	0.16991	0.341517	0.0910646	0.947716	0.691152	0.915223	TRUE	0.202585
L1Md_F2_dup46200:L1Md_F2:L1:LINE	chr11:77433130-77436919	0.0525761	0	0.198049	0	0	0	0.333903	0.651555	0.901502	0.403775	TRUE	0.203791
ORR1A0_dup529:ORR1A0:ERVL-MaLR:LTR	chr4:108582400-108582744	0	0	0	0	0.33982	0.124188	0	0.562706	0.0300501	0.134592	TRUE	0.203892
L1Md_F2_dup8541:L1Md_F2:L1:LINE	chr2:155147577-155148333	0.0525761	0.213898	0.330082	0.208252	0.084955	0.217329	0	0.177697	0.691152	0.403775	TRUE	0.203922
MERVL-int_dup509:MERVL-int:ERVL:LTR	chr3:133016687-133016916	1.1041	0.285198	0.528131	1.04126	0.594685	0.372564	0.607097	1.62889	2.61436	1.48051	TRUE	0.204288
MERVL-int_dup2249:MERVL-int:ERVL:LTR	chr15:95306546-95311900	0	0.427797	0	0	0.33982	0.217329	0	0.0296161	0.270451	0.96906	TRUE	0.204369
L1_Mus1_dup3608:L1_Mus1:L1:LINE	chr3:8996552-8997789	0.368033	0.499096	0	0.138835	0	1.30398	0.758871	4.29434	3.99666	3.74165	TRUE	0.204554
B2_Mm1a_dup15673:B2_Mm1a:B2:SINE	chr15:103294308-103294466	0	0.499096	0.132033	0.416504	0.33982	0.589894	0	1.18464	0.871452	1.37284	TRUE	0.20512
MTA_Mm-int_dup49:MTA_Mm-int:ERVL-MaLR:LTR	chr1:20393210-20394287	0.210305	0.784294	0	0.208252	0	0.372564	0	0.266545	1.17195	0.726795	TRUE	0.205146
MTA_Mm-int_dup2998:MTA_Mm-int:ERVL-MaLR:LTR	chr19:52968330-52969424	0.262881	0.142599	0	0	0	0.186282	0	0.473858	0.15025	0.457612	TRUE	0.205286
MTA_Mm-int_dup2999:MTA_Mm-int:ERVL-MaLR:LTR	chr19:52969819-52970913	0.262881	0.142599	0	0	0	0.186282	0	0.473858	0.15025	0.457612	TRUE	0.205286
L1_Mm_dup4471:L1_Mm:L1:LINE	chr14:41975194-41975805	0.420609	0	0.132033	0	0	0	0.242839	0.385009	0.270451	0.753713	TRUE	0.205397
L1Md_T_dup11708:L1Md_T:L1:LINE	chr9:79468163-79469795	0.473185	0.641695	0.594147	1.66602	0.254865	1.17979	0	1.12541	3.39566	2.31498	TRUE	0.20564
B4A_dup84360:B4A:B4:SINE	chr13:65626961-65627048	0.0525761	0.0712994	0	0	0	0.279423	0.333903	1.24388	0.961602	1.34592	TRUE	0.205751
IAPLTR1a_Mm_dup1119:IAPLTR1a_Mm:ERVK:LTR	chr11:6148294-6148630	0.420609	0	0.0660164	0.0694173	0	0.186282	0	0.473858	0.1202	0.48453	TRUE	0.205759
Lx5c_dup7719:Lx5c:L1:LINE	chr8:73165217-73166165	0.262881	0.142599	0.132033	0.277669	0	0.0620941	0.364258	0.592322	0.631051	1.23824	TRUE	0.206223
L1Md_F3_dup14348:L1Md_F3:L1:LINE	chr16:19081333-19083676	0.315457	0.427797	0	0	0.16991	0.403612	0	0.325777	1.05175	0.942142	TRUE	0.206974
MTA_Mm_dup2316:MTA_Mm:ERVL-MaLR:LTR	chr2:176620002-176620402	2.73396	0.427797	3.49887	1.24951	2.54865	0.962458	0.910646	3.82048	2.0434	4.89914	TRUE	0.207008
MERVL-int_dup1171:MERVL-int:ERVL:LTR	chr8:74608656-74609051	0	0.926892	0	0	0.424775	0	0.819581	1.56965	3.12521	0	TRUE	0.207516
IAPLTR1_Mm_dup1100:IAPLTR1_Mm:ERVK:LTR	chr12:73315479-73315860	0	0.213898	0	1.66602	1.27432	0.124188	0	0.118464	0	0.592203	TRUE	0.207684
MMERVK10C-int_dup1642:MMERVK10C-int:ERVK:LTR	chr9:107214431-107217307	0	2.70938	0.132033	0	0.084955	0.683035	0	2.87276	0.631051	0.403775	TRUE	0.20773
L1_Mus2_dup9025:L1_Mus2:L1:LINE	chr8:85276653-85277316	0	0	0	0.347086	0	0.0620941	0.455323	0.53309	1.2621	1.15749	TRUE	0.208143
L1Md_A_dup2809:L1Md_A:L1:LINE	chr3:73450505-73456861	1.15668	1.49729	0.330082	1.45776	0.84955	0.869317	0	1.42157	2.43406	1.10365	TRUE	0.208195
B1_Mus2_dup16896:B1_Mus2:Alu:SINE	chr4:137933668-137933775	0.0525761	0	0	0	0	0.124188	0.242839	0.710787	0.841402	0.538367	TRUE	0.208452
L1_Mus1_dup19616:L1_Mus1:L1:LINE	chr12:18649990-18650391	0.473185	1.28339	1.05626	1.24951	0.764595	0	0.424968	0.651555	1.1419	0.619122	TRUE	0.208999
L1Md_F2_dup59436:L1Md_F2:L1:LINE	chr16:78289278-78290203	0.210305	0	0	0.347086	0.254865	0	0.121419	0.296161	0.15025	0.242265	TRUE	0.20915
ORR1A0-int_dup160:ORR1A0-int:ERVL-MaLR:LTR	chr6:54823946-54824652	0	0	0	0	0.16991	0.217329	0	0.740403	0.330551	0.16151	TRUE	0.209177
L1_Mus1_dup8823:L1_Mus1:L1:LINE	chr6:28493460-28496888	0.473185	0	0.660164	0.416504	0.084955	0.5278	0.0607097	0.385009	1.4424	1.50743	TRUE	0.209305
RLTR1B-int_dup167:RLTR1B-int:ERV1:LTR	chr4:42227577-42229877	0	0.0712994	0	0	0.084955	0	0.303549	0.562706	0.390651	0.753713	TRUE	0.210564
B2_Mm2_dup9492:B2_Mm2:B2:SINE	chr2:122057555-122057713	0.315457	0	0	0.485921	0.254865	0.0931411	0	0.236929	0.15025	0.134592	TRUE	0.21121
L1Md_F2_dup21153:L1Md_F2:L1:LINE	chr6:30880488-30881072	0.210305	0.285198	0	0.208252	0	0.31047	0	0.385009	0.781302	0.565285	TRUE	0.211944
B2_Mm1t_dup6167:B2_Mm1t:B2:SINE	chr5:34581496-34581665	0	0	0.330082	0	0.424775	0.186282	0	0.118464	0.300501	0.619122	TRUE	0.212084
MT2_Mm_dup1723:MT2_Mm:ERVL:LTR	chr11:4775402-4775789	0.578338	0.356497	0.594147	0.902425	0.934505	0.776176	0	1.54004	1.9232	0.861387	TRUE	0.212113
L1Md_T_dup16205:L1Md_T:L1:LINE	chr10:74433317-74439528	0.841218	0.570395	0	0	0	0.496753	0	0.53309	1.9833	0.242265	TRUE	0.212664
MTA_Mm-int_dup1192:MTA_Mm-int:ERVL-MaLR:LTR	chr6:72138086-72139182	0	0.213898	0	0	0	0	0.728517	1.12541	0.300501	2.61108	TRUE	0.213026
L1Md_T_dup20467:L1Md_T:L1:LINE	chr15:20821448-20827799	0	0.499096	0.462115	0	0.33982	0.0620941	0.637452	0.770019	1.59265	1.50743	TRUE	0.213301
MERVL-int_dup254:MERVL-int:ERVL:LTR	chr2:77075841-77076466	0.210305	0.0712994	0.198049	0	0	0.31047	0	0.681171	0.601001	0.430693	TRUE	0.213767
L1_Mm_dup4280:L1_Mm:L1:LINE	chr13:49510999-49513063	0.315457	0	0.396098	0	0	0.372564	0.424968	0.53309	1.95325	1.9112	TRUE	0.21386
MMSAT4_dup264:MMSAT4:Satellite:Satellite	chr4:146657747-146658412	2.89169	0.570395	9.96847	13.1199	5.0973	2.45272	0	1.95466	5.16861	6.37965	TRUE	0.214124
MTA_Mm-int_dup2197:MTA_Mm-int:ERVL-MaLR:LTR	chr12:31163092-31164184	0	0.356497	0	0.208252	0	0.279423	0	0.355393	0.480801	0.699877	TRUE	0.214369
MTA_Mm-int_dup1387:MTA_Mm-int:ERVL-MaLR:LTR	chr7:128326866-128327959	0	0.427797	0	0	0	0.807223	0	1.48081	1.3823	1.56126	TRUE	0.21487
L1Md_T_dup23472:L1Md_T:L1:LINE	chr19:33594851-33600520	0.0525761	0.712994	0.528131	2.36019	0.254865	0.0620941	0.667807	1.24388	1.11185	1.64202	TRUE	0.214989
L1_Mm_dup4872:L1_Mm:L1:LINE	chr16:32920588-32921348	0.420609	0.142599	0.264065	0	0.084955	0	0.455323	0.414626	1.35225	0.726795	TRUE	0.215001
L1Md_F_dup259:L1Md_F:L1:LINE	chr1:177926364-177928807	0.368033	0.998192	0.330082	0.902425	0.424775	0.558847	0	0.710787	1.35225	0.995979	TRUE	0.215091
L1Md_F2_dup48608:L1Md_F2:L1:LINE	chr12:82377145-82380070	0.368033	0.142599	0	0.347086	0	0.403612	0	0.325777	1.0217	0.861387	TRUE	0.215123
L1_Mus3_dup22746:L1_Mus3:L1:LINE	chrX:23715270-23715859	0	0	0.660164	0.0694173	0.16991	0.0620941	0	0.148081	0.0300501	0.16151	TRUE	0.215215
L1_Mur1_dup6194:L1_Mur1:L1:LINE	chr14:4193764-4194129	6.8349	0.784294	1.91447	0.208252	0	1.27293	0.637452	3.52432	2.91486	3.90316	TRUE	0.216959
MERVL-int_dup1111:MERVL-int:ERVL:LTR	chr7:143635674-143636439	0.525761	1.56859	0	0.833008	1.86901	1.0556	0	2.60622	2.1636	0.942142	TRUE	0.217042
L1_Mus3_dup39355:L1_Mus3:L1:LINE	chr14:6765188-6765745	0.105152	0.213898	0.330082	0.347086	1.61414	0.496753	0.485678	2.60622	0.841402	1.85737	TRUE	0.217396
ORR1A1-int_dup209:ORR1A1-int:ERVL-MaLR:LTR	chr5:3797090-3798856	0	0	0.198049	0	0	0.869317	0	2.04351	0.961602	1.66894	TRUE	0.218128
L1Md_T_dup20515:L1Md_T:L1:LINE	chr15:25110912-25117396	0	0	0	0	0.594685	0.217329	0	0.385009	0.540901	0.242265	TRUE	0.218177
MTA_Mm-int_dup323:MTA_Mm-int:ERVL-MaLR:LTR	chr2:38565067-38566161	0.0525761	1.49729	0.132033	0.694173	0	1.33502	0.242839	3.55393	3.87646	1.0229	TRUE	0.218741
RLTR10_dup2071:RLTR10:ERVK:LTR	chr12:36101734-36102169	0.315457	0	0	0	0	0.403612	0	0.947716	0.661101	0.538367	TRUE	0.219944
ETnERV-int_dup67:ETnERV-int:ERVK:LTR	chr2:144149300-144155682	1.05152	4.06407	0.132033	0	0	0.248376	0	0.0888483	1.23205	0	TRUE	0.220001
L1Md_T_dup17246:L1Md_T:L1:LINE	chr12:10988633-10993880	0	0	0	0	0.934505	0.186282	0	0	0.931552	0.0538367	TRUE	0.220921
MERVL-int_dup1864:MERVL-int:ERVL:LTR	chr12:71965232-71967155	4.78443	2.78068	0	0	2.20883	0	2.00342	1.45119	3.87646	5.24908	TRUE	0.221261
L1Md_T_dup3873:L1Md_T:L1:LINE	chr3:56069649-56074950	0	1.28339	0.462115	1.18009	0.16991	0.900364	0	1.59927	2.07345	1.07673	TRUE	0.221401
L1Md_T_dup4390:L1Md_T:L1:LINE	chr3:106285161-106290637	0.157728	0.926892	0.264065	0.485921	0.84955	0.683035	0	0.681171	1.6828	1.23824	TRUE	0.22144
L1Md_T_dup13225:L1Md_T:L1:LINE	chrX:84153348-84160558	0	0	0.528131	0.624756	0	0.31047	0	0	0.721202	0.915223	TRUE	0.22154
MTA_Mm_dup5474:MTA_Mm:ERVL-MaLR:LTR	chr6:32926527-32926922	0	0	0	0.347086	0.084955	0	0.151774	0.473858	0.240401	0.080755	TRUE	0.222614
ORR1A1-int_dup27:ORR1A1-int:ERVL-MaLR:LTR	chr1:93464728-93464987	0.473185	0.142599	0.198049	0	0.254865	0.186282	0.242839	1.0958	0.961602	0.188428	TRUE	0.222765
MMSAT4_dup259:MMSAT4:Satellite:Satellite	chr4:145899311-145899975	1.26183	1.06949	2.8387	2.77669	1.35928	0	1.39632	1.18464	1.3823	4.73763	TRUE	0.22284
L1Md_T_dup9894:L1Md_T:L1:LINE	chr7:104027601-104034674	0.893795	2.06768	0.990246	1.18009	0	0.83827	0.667807	2.48775	3.24541	2.12655	TRUE	0.223259
MurSatRep1_dup290:MurSatRep1:MurSatRep1:Unknown	chr2:177832449-177832753	1.26183	2.13898	2.31057	3.95679	4.07784	1.24188	0.971355	3.52432	3.00501	4.97989	TRUE	0.223875
L1_Mm_dup700:L1_Mm:L1:LINE	chr3:9478912-9479526	0.525761	0.0712994	0.396098	0.416504	0.084955	0.403612	0.546387	1.74735	1.59265	1.58818	TRUE	0.224297
L1Md_F2_dup51326:L1Md_F2:L1:LINE	chr13:91657349-91658345	0.157728	0	0.330082	0.347086	0.084955	0.248376	0.364258	1.30311	1.0818	0.780632	TRUE	0.224985
B2_Mm1t_dup13622:B2_Mm1t:B2:SINE	chr10:23814922-23815085	0.841218	0.427797	0.330082	0.76359	1.27432	0.279423	0	0.207313	0.420701	0.80755	TRUE	0.225985
MTA_Mm-int_dup928:MTA_Mm-int:ERVL-MaLR:LTR	chr4:147668265-147669122	1.3144	1.42599	0.858213	0.902425	0.67964	1.02455	0	0	0.390651	4.87222	TRUE	0.226014
L1Md_A_dup1928:L1Md_A:L1:LINE	chr2:114893921-114896119	0.157728	0.0712994	0.132033	0	0.33982	0.031047	0.0910646	0.177697	0.1803	0.269183	TRUE	0.226036
RLTR13B3_dup59:RLTR13B3:ERVK:LTR	chr3:95343532-95344490	0.630914	0	0	0.277669	0.764595	0.279423	0	0.53309	0.901502	0	TRUE	0.226104
L1Md_F2_dup19140:L1Md_F2:L1:LINE	chr5:81355319-81356377	0.368033	0	0	0	0	0.31047	0	0.473858	0.661101	0.457612	TRUE	0.22626
L1Md_T_dup10102:L1Md_T:L1:LINE	chr8:28964355-28971202	0.368033	0.784294	0.132033	0.208252	0.33982	0.620941	0.667807	2.0139	3.12521	1.42667	TRUE	0.227456
L1Md_T_dup199:L1Md_T:L1:LINE	chr1:20228998-20235098	0	0.0712994	0.594147	1.11068	0	0.620941	0	0.444242	1.65275	1.04982	TRUE	0.228387
RLTR4_Mm_dup73:RLTR4_Mm:ERV1:LTR	chr5:25230699-25231439	0	0.926892	0	0	0	0.931411	0	0.0888483	0.991652	3.63398	TRUE	0.228601
MMSAT4_dup202:MMSAT4:Satellite:Satellite	chr2:177542348-177542474	0.315457	0.427797	0.330082	0.624756	0.50973	0.0931411	0.0607097	0.266545	0.510851	0	TRUE	0.228906
MERVL-int_dup875:MERVL-int:ERVL:LTR	chr6:61254924-61255363	0	0	0.462115	0	0	0.248376	0	0.592322	0.661101	0	TRUE	0.229131
MT-int_dup162:MT-int:ERVL-MaLR:LTR	chr6:61257621-61258120	0.157728	0.213898	0	0.208252	0.084955	0.496753	0	0.621938	0.931552	0.942142	TRUE	0.229924
L1Md_F2_dup45524:L1Md_F2:L1:LINE	chr11:30869570-30870551	0.210305	0.570395	0	0.416504	0	0.372564	0.941001	0.947716	3.54591	2.09963	TRUE	0.230084
L1_Mus1_dup22132:L1_Mus1:L1:LINE	chr14:50387057-50387258	0	0.213898	0	0.208252	0	0.0931411	0.182129	0.414626	0.961602	0	TRUE	0.230785
L1Md_F2_dup34772:L1Md_F2:L1:LINE	chrX:51587727-51588961	0	0	0	0.208252	0	0.31047	0	0.562706	0.420701	0.565285	TRUE	0.231188
L1Md_F3_dup2539:L1Md_F3:L1:LINE	chr3:75460541-75466709	0	0	0	0.694173	0	0.186282	0	0.325777	0.601001	0	TRUE	0.231656
MTD_dup37427:MTD:ERVL-MaLR:LTR	chr12:22591645-22591838	1.15668	0.285198	0.858213	0.694173	0	0	0.910646	1.86582	1.23205	1.42667	TRUE	0.231893
B1_Mus2_dup46795:B1_Mus2:Alu:SINE	chr11:70696229-70696319	0.105152	0.213898	0.264065	0.138835	0	0.186282	0.151774	0.710787	0.480801	0.48453	TRUE	0.232266
MurSatRep1_dup1643:MurSatRep1:MurSatRep1:Unknown	chr12:20322605-20322784	1.26183	0.641695	0.990246	2.77669	0.84955	0.248376	0.151774	0	1.202	0.780632	TRUE	0.232388
MERVL-int_dup1216:MERVL-int:ERVL:LTR	chr9:20368383-20373669	0.525761	0.641695	1.65041	0	0	0.372564	0	0.385009	0.570951	0.888305	TRUE	0.232551
IAPEz-int_dup983:IAPEz-int:ERVK:LTR	chr2:156211461-156212060	0	0.142599	0	0	0.67964	0.341517	0	0.53309	0.450751	0.699877	TRUE	0.233278
L1Md_T_dup17513:L1Md_T:L1:LINE	chr12:43748765-43754298	0.210305	0.712994	1.12228	2.29077	1.01946	1.30398	0	1.33273	2.64441	2.44957	TRUE	0.233334
RLTR10D_dup315:RLTR10D:ERVK:LTR	chr12:20133266-20133641	0	0.142599	0	0.277669	0	0.217329	0.121419	0.858867	0.270451	0.538367	TRUE	0.233533
MMETn-int_dup770:MMETn-int:ERVK:LTR	chr14:5659062-5662927	0.157728	0	0.330082	0.277669	0.33982	0	0.0303549	0.0592322	0.0901502	0	TRUE	0.233601
L1Md_F2_dup29360:L1Md_F2:L1:LINE	chr8:73238010-73240276	0.893795	0.712994	0.330082	0.277669	0.424775	0.714082	0	0.592322	1.1419	1.77661	TRUE	0.23377
L1Md_F2_dup1740:L1Md_F2:L1:LINE	chr1:62338988-62339622	0.315457	0.356497	0	0.138835	0	0	0.151774	0.266545	0.450751	0.0269183	TRUE	0.23425
L1Md_F2_dup25321:L1Md_F2:L1:LINE	chr7:44450817-44451121	0.105152	0	0.132033	0.416504	0.424775	0.0620941	0	0.0592322	0	0.242265	TRUE	0.236016
B2_Mm1t_dup5216:B2_Mm1t:B2:SINE	chr4:126378533-126378723	0	0	0	0	1.86901	0.031047	0	0	0.15025	0	TRUE	0.236614
MMSAT4_dup258:MMSAT4:Satellite:Satellite	chr4:145828056-145829436	8.62249	8.12813	15.1838	32.0708	0	0.031047	6.43523	1.06618	7.33222	22.8806	TRUE	0.236696
L1Md_Gf_dup881:L1Md_Gf:L1:LINE	chr12:61627447-61629046	0	0.213898	0	0.347086	0	0.186282	0.151774	0.53309	0.721202	0.376857	TRUE	0.237151
L1_Mus3_dup21563:L1_Mus3:L1:LINE	chr9:55724892-55727442	0.315457	0	0.330082	0.138835	0.084955	0.279423	0	0.236929	0.570951	0.538367	TRUE	0.237419
L1Md_A_dup12638:L1Md_A:L1:LINE	chr12:22137899-22144070	0.946371	0.998192	0.72618	1.11068	1.01946	0.186282	0.273194	0.740403	0.961602	0.511448	TRUE	0.237442
IAPEz-int_dup6485:IAPEz-int:ERVK:LTR	chr16:33850897-33852202	0.157728	0.213898	0.528131	0.208252	0	0.279423	0	0.681171	0.1803	0.48453	TRUE	0.237452
L1Md_F3_dup620:L1Md_F3:L1:LINE	chr1:105533443-105539640	0	0.142599	0.462115	0	0	0.248376	0	0.444242	0.751252	0	TRUE	0.237596
B2_Mm1a_dup6356:B2_Mm1a:B2:SINE	chr6:115917653-115917835	0	0	0.264065	0	0	0.124188	0.121419	0.53309	0	0.64604	TRUE	0.238062
RLTR10-int_dup2134:RLTR10-int:ERVK:LTR	chr14:86915871-86916824	0.68349	1.21209	0.924229	1.45776	1.61414	1.27293	0	1.95466	1.803	2.3419	TRUE	0.238407
B2_Mm1a_dup9217:B2_Mm1a:B2:SINE	chr9:66532505-66532664	0.525761	0	0	0.0694173	0.424775	0.031047	0	0.118464	0.0300501	0	TRUE	0.238719
B1_Mus1_dup1715:B1_Mus1:Alu:SINE	chr1:63111720-63111813	0.998947	0.356497	0.858213	0.555338	0.16991	2.01806	5.646	17.4439	10.187	9.01764	TRUE	0.238783
RLTR4_Mm_dup103:RLTR4_Mm:ERV1:LTR	chr8:71780211-71780438	0	1.28339	1.58439	1.18009	0	0.620941	0	0.562706	1.59265	0.80755	TRUE	0.239172
L1Md_T_dup9939:L1Md_T:L1:LINE	chr7:106893727-106894464	0.157728	0.427797	0.396098	0.485921	0	0.465706	0.667807	1.54004	2.58431	1.26516	TRUE	0.23982
L1Md_F2_dup51529:L1Md_F2:L1:LINE	chr13:104707775-104708577	0.105152	0.142599	0.132033	0	0	0.217329	0.637452	1.24388	1.35225	1.45359	TRUE	0.240472
L1Md_T_dup13841:L1Md_T:L1:LINE	chrX:126135118-126141547	0	0	0	0	0	0.434659	0	0.651555	1.05175	0.349938	TRUE	0.24101
MTA_Mm-int_dup209:MTA_Mm-int:ERVL-MaLR:LTR	chr1:125782458-125783448	0.105152	0.213898	0.0660164	0.277669	0.254865	0.496753	0	1.24388	0.240401	0.861387	TRUE	0.24108
L1_Mm_dup32:L1_Mm:L1:LINE	chr1:11624894-11625810	2.62881	3.35107	2.8387	3.26261	1.6991	0.807223	3.15691	3.55393	10.3072	4.8453	TRUE	0.241199
MTA_Mm_dup2320:MTA_Mm:ERVL-MaLR:LTR	chr2:176682859-176683000	0	0.213898	0.528131	0.694173	0.16991	0.155235	0.121419	0.177697	0.1803	0.942142	TRUE	0.241955
B2_Mm1a_dup6812:B2_Mm1a:B2:SINE	chr7:19708428-19708620	0.315457	0.142599	0.132033	0	0	0.217329	0	0.651555	0.1803	0.188428	TRUE	0.242145
MERVL-int_dup1967:MERVL-int:ERVL:LTR	chr13:54554548-54554946	0	0.641695	0	0	0	0.31047	0	0.0888483	0.450751	0.915223	TRUE	0.242488
RLTR14-int_dup1116:RLTR14-int:ERV1:LTR	chr14:3068678-3068813	0.578338	0.285198	0	0	0.33982	0.31047	0	0.177697	0.21035	1.04982	TRUE	0.244649
RLTR14-int_dup1293:RLTR14-int:ERV1:LTR	chr14:6267938-6268073	0.578338	0.285198	0.858213	2.49902	0.33982	0.31047	0	0.177697	0.21035	1.04982	TRUE	0.244649
L1Md_T_dup12347:L1Md_T:L1:LINE	chrX:26204344-26209789	1.20925	1.78249	1.12228	1.94368	1.18937	1.02455	0.667807	1.27349	4.47746	2.07271	TRUE	0.244981
B2_Mm1a_dup17734:B2_Mm1a:B2:SINE	chr19:4873860-4874019	0	0.285198	0	0.0694173	0.594685	0	0.212484	0.681171	0.300501	0	TRUE	0.245099
L1Md_T_dup1426:L1Md_T:L1:LINE	chr1:140352112-140352558	0.368033	0.142599	0	0.208252	0	0.124188	0	0.385009	0	0.188428	TRUE	0.245199
IAPEz-int_dup3288:IAPEz-int:ERVK:LTR	chr8:91433426-91434018	0.893795	1.28339	0.528131	0.833008	1.27432	2.01806	0	3.19854	4.41736	1.69586	TRUE	0.24533
L1Md_T_dup11430:L1Md_T:L1:LINE	chr9:25752199-25758847	0	0.427797	0	0.277669	0.084955	0.589894	0	0	1.83305	0.888305	TRUE	0.245367
RLTR4_MM-int_dup211:RLTR4_MM-int:ERV1:LTR	chr8:90886778-90889360	1.41956	1.28339	0.660164	1.66602	1.27432	1.73863	1.76058	4.91628	6.70116	4.52228	TRUE	0.245404
L1Md_T_dup1348:L1Md_T:L1:LINE	chr1:130491093-130496719	0	0	0.198049	0	0	0.279423	0.394613	0.385009	1.5025	1.21133	TRUE	0.246005
L1Md_F2_dup5841:L1Md_F2:L1:LINE	chr2:44795825-44799277	0.157728	0	0.528131	0.416504	0	0.124188	0	0.177697	0.390651	0	TRUE	0.246852
MMSAT4_dup981:MMSAT4:Satellite:Satellite	chr12:20244988-20245089	1.89274	1.56859	3.16879	0	0.934505	0.217329	0.333903	0.355393	0.631051	1.53435	TRUE	0.246995
L1Md_T_dup9276:L1Md_T:L1:LINE	chr7:42841963-42844318	3.36487	2.13898	1.45236	2.15194	1.95396	2.639	2.76229	6.01207	10.6978	7.96783	TRUE	0.247164
B2_Mm1t_dup3161:B2_Mm1t:B2:SINE	chr2:177939110-177939290	0.630914	0.427797	2.70667	2.49902	1.78405	0	0.698162	0	0.1202	3.06869	TRUE	0.247217
RLTR10-int_dup524:RLTR10-int:ERVK:LTR	chr4:88255028-88255948	0	0	0	0	0	0.372564	0	0.888483	0.300501	0.511448	TRUE	0.247356
B2_Mm1t_dup4832:B2_Mm1t:B2:SINE	chr4:98978144-98978299	0.630914	0.356497	0	0.277669	0.254865	0.0620941	0	0.148081	0	0.134592	TRUE	0.247839
B2_Mm1t_dup22339:B2_Mm1t:B2:SINE	chr18:60693311-60693494	0	0.0712994	0	0.833008	0.33982	0.248376	0.151774	0.858867	0.15025	0.80755	TRUE	0.248346
RLTR1B-int_dup641:RLTR1B-int:ERV1:LTR	chr15:4559859-4559950	2.94426	2.35288	3.6309	3.88737	2.97342	4.00507	4.705	11.1653	14.7546	13.5668	TRUE	0.248614
ORR1A0-int_dup240:ORR1A0-int:ERVL-MaLR:LTR	chr9:10320540-10322315	0	0	0.462115	0	0	0.31047	0	0.681171	0.480801	0.242265	TRUE	0.249048
IAPLTR2a2_Mm_dup1034:IAPLTR2a2_Mm:ERVK:LTR	chr11:88021551-88022006	0.262881	0.213898	0.132033	0.138835	0	0.372564	0.333903	1.6585	0.781302	0.753713	TRUE	0.249153
MT2A_dup9251:MT2A:ERVL:LTR	chr17:5159303-5159495	0.736066	0.926892	0.924229	0.902425	1.35928	0.434659	0.728517	1.45119	2.13355	1.66894	TRUE	0.249307
MMERVK10C-int_dup983:MMERVK10C-int:ERVK:LTR	chr5:99907476-99912503	0	0	0.462115	0	0.934505	0.217329	0	0.710787	0.270451	0	TRUE	0.249377
B2_Mm1a_dup3824:B2_Mm1a:B2:SINE	chr4:123914331-123914507	0	0	0	0	0	0	0.637452	1.15503	0.480801	1.23824	TRUE	0.249638
RLTR9E_dup993:RLTR9E:ERVK:LTR	chr13:66123861-66124264	3.5226	1.92508	3.36683	4.72038	2.03892	2.08015	0	3.70201	2.13355	3.47247	TRUE	0.251059
L1Md_T_dup9898:L1Md_T:L1:LINE	chr7:104120069-104125711	0.893795	1.28339	0.198049	2.42961	2.6336	0	2.51945	2.5766	6.73121	1.96504	TRUE	0.251074
L1_Mm_dup1673:L1_Mm:L1:LINE	chr6:36933611-36933907	0	0.213898	0.264065	0.277669	0.254865	0.217329	0.212484	0.621938	1.11185	0.188428	TRUE	0.251163
L1Md_F2_dup45562:L1Md_F2:L1:LINE	chr11:33419748-33421817	1.3144	0.641695	0.924229	1.18009	0.33982	1.17979	0.394613	1.89543	2.76461	2.36881	TRUE	0.25149
RMER16-int_dup345:RMER16-int:ERVK:LTR	chr2:176616799-176617145	0.315457	0.499096	0.924229	0	0.594685	0.155235	0	0.296161	0.1803	0.215347	TRUE	0.251825
B1_Mus1_dup70911:B1_Mus1:Alu:SINE	chr12:84602658-84602801	0.157728	0.142599	0	0.138835	0.16991	0.0931411	0	0.414626	0	0	TRUE	0.252034
B1_Mm_dup37481:B1_Mm:Alu:SINE	chr16:20690648-20690751	0.157728	0.641695	0.198049	0.0694173	0	0.124188	0	0.0888483	0.0601001	0.403775	TRUE	0.252071
L1Md_A_dup13769:L1Md_A:L1:LINE	chr14:5367429-5368066	0.368033	0.427797	1.05626	0.485921	0.33982	0.341517	0.546387	1.51042	1.17195	1.26516	TRUE	0.252275
L1Md_A_dup13776:L1Md_A:L1:LINE	chr14:5719971-5720608	0.368033	0.427797	1.05626	0.485921	0.33982	0.341517	0.546387	1.51042	1.17195	1.26516	TRUE	0.252275
MMSAT4_dup176:MMSAT4:Satellite:Satellite	chr2:177125631-177126104	0.736066	0.855593	1.98049	3.1932	1.78405	0	0.971355	1.18464	1.83305	1.29208	TRUE	0.252658
IAPEz-int_dup6497:IAPEz-int:ERVK:LTR	chr16:44040877-44042693	0	0	0.858213	0	1.01946	0.279423	0	0.503474	0.601001	0.134592	TRUE	0.252765
L1Md_T_dup2039:L1Md_T:L1:LINE	chr2:20146764-20152013	0	0.213898	0.264065	0.416504	0.254865	0.465706	0	0.9181	1.1419	0	TRUE	0.253233
RLTR31D_MM_dup6551:RLTR31D_MM:ERVK:LTR	chr14:6754613-6754710	0.157728	0.285198	0	0.208252	0.424775	0.155235	0	0.118464	0.270451	0.296102	TRUE	0.253688
Tigger1_dup107:Tigger1:TcMar-Tigger:DNA	chr2:91382015-91382188	0.210305	0	0.132033	0.138835	0.16991	0.248376	0.0607097	0.325777	0.661101	0.376857	TRUE	0.253715
L1_Mm_dup4500:L1_Mm:L1:LINE	chr14:56924006-56924598	1.73501	0.998192	0.594147	0.485921	0.67964	1.55235	1.42668	4.20549	5.22871	3.68781	TRUE	0.254031
B2_Mm1a_dup14492:B2_Mm1a:B2:SINE	chr14:34400467-34400657	0	0.0712994	0	0	0.16991	0.031047	0.303549	1.21426	0.15025	0.107673	TRUE	0.254242
MERVL-int_dup919:MERVL-int:ERVL:LTR	chr6:116685650-116690953	3.78548	3.13717	2.37659	0	2.03892	2.01806	0	1.36234	4.62771	2.79951	TRUE	0.256171
B2_Mm1a_dup8606:B2_Mm1a:B2:SINE	chr8:122491991-122492141	1.1041	0.998192	0.924229	0.971842	0.934505	0.403612	0	1.03656	0.1803	0.538367	TRUE	0.256462
L1Md_T_dup10627:L1Md_T:L1:LINE	chr8:54701228-54701492	0.0525761	0.0712994	0.594147	0	0.33982	0.0620941	0	0.0296161	0.240401	0	TRUE	0.256476
L1_Mus1_dup24202:L1_Mus1:L1:LINE	chr16:40320770-40320997	0.210305	0.142599	0	0.0694173	0.084955	0.155235	0.182129	0.385009	0.540901	0.538367	TRUE	0.256834
L1Md_A_dup11996:L1Md_A:L1:LINE	chr10:103569398-103575593	0	0	0	0.971842	0	0.0931411	0	0	0	0.403775	TRUE	0.257065
L1Md_F2_dup25862:L1Md_F2:L1:LINE	chr7:60273927-60279096	0	0.570395	0	0.347086	0	0.186282	0	0.385009	0.420701	0	TRUE	0.257501
B2_Mm1t_dup17142:B2_Mm1t:B2:SINE	chr12:87315984-87316159	0	0.427797	0.72618	0	0.254865	0.031047	0.546387	0.503474	1.2621	0.726795	TRUE	0.257897
L1Md_F2_dup1564:L1Md_F2:L1:LINE	chr1:52992664-52993177	0.0525761	0.0712994	0.0660164	0.277669	0.33982	0.155235	0.0607097	0.118464	0.570951	0.242265	TRUE	0.257979
MTA_Mm-int_dup2942:MTA_Mm-int:ERVL-MaLR:LTR	chr19:15956919-15958013	0.736066	0.784294	0.330082	0	0.16991	0	0.941001	1.18464	0.721202	2.15347	TRUE	0.258006
RLTR1B-int_dup702:RLTR1B-int:ERV1:LTR	chr17:13483338-13484062	2.10305	1.78249	1.71643	2.77669	0	4.37763	0	0	9.40567	9.47525	TRUE	0.25804
MurSatRep1_dup231:MurSatRep1:MurSatRep1:Unknown	chr2:176835609-176836485	0.841218	1.06949	0.990246	3.67912	0.934505	0	0.364258	0.888483	0.330551	0.349938	TRUE	0.258295
L1Md_T_dup2439:L1Md_T:L1:LINE	chr2:75181955-75182692	0	0.213898	0	0.277669	0	0.279423	0	0.266545	0.931552	0	TRUE	0.259168
L1_Mus3_dup10468:L1_Mus3:L1:LINE	chr4:57817753-57819410	0.630914	0.499096	0.660164	0	0.67964	0.496753	0.212484	0.473858	1.3823	1.18441	TRUE	0.259197
B2_Mm2_dup54173:B2_Mm2:B2:SINE	chr10:62547319-62547493	0	0	0.594147	0.208252	0	0.155235	0.0910646	0.266545	0.330551	0.457612	TRUE	0.259416
B1_Mus1_dup9158:B1_Mus1:Alu:SINE	chr2:101805456-101805598	0.210305	0.213898	0.198049	0.277669	0.084955	1.17979	2.64087	5.89361	5.37896	5.08757	TRUE	0.259425
MMSAT4_dup934:MMSAT4:Satellite:Satellite	chr12:18534255-18534376	0.68349	0.499096	0.924229	0.833008	0.594685	0.124188	0.273194	0.177697	0.631051	0.888305	TRUE	0.259939
RLTR10_dup1025:RLTR10:ERVK:LTR	chr6:134692095-134692531	0.420609	0.285198	0	0.416504	0.16991	0	0.910646	0.503474	1.5626	1.80353	TRUE	0.260901
L1Md_F2_dup28851:L1Md_F2:L1:LINE	chr8:56024443-56024909	0	0.213898	0	0	0	0	0.212484	0.592322	0.1202	0.188428	TRUE	0.26132
MMSAT4_dup143:MMSAT4:Satellite:Satellite	chr2:176434294-176434681	3.78548	2.42418	2.77269	0	2.03892	1.30398	0.728517	2.22121	3.15526	3.20328	TRUE	0.262178
MTA_Mm_dup2350:MTA_Mm:ERVL-MaLR:LTR	chr2:177190134-177190534	1.57728	4.70576	2.64065	2.0131	2.12387	2.48376	0	3.61317	3.36561	3.49938	TRUE	0.262299
L1Md_F_dup3926:L1Md_F:L1:LINE	chr19:8498145-8500000	0	0	0.264065	0.416504	0	0.186282	0	0.296161	0.300501	0.188428	TRUE	0.262489
L1Md_T_dup10896:L1Md_T:L1:LINE	chr8:76097790-76103646	0.893795	0.998192	0.462115	0.971842	0	0.651988	0.273194	0	2.34391	1.53435	TRUE	0.263533
L1_Mus1_dup12528:L1_Mus1:L1:LINE	chr8:124041328-124041849	0	0.142599	0.198049	0	0	0.0931411	0.182129	0.385009	0.661101	0.107673	TRUE	0.263553
MTA_Mm-int_dup1348:MTA_Mm-int:ERVL-MaLR:LTR	chr7:81147942-81149034	2.4185	1.56859	1.25431	1.18009	0	2.45272	1.30526	4.64973	5.88981	5.16832	TRUE	0.26409
L1Md_A_dup4306:L1Md_A:L1:LINE	chr5:7145787-7149634	0	0.142599	0	0	0.33982	0.279423	0	0.444242	0.480801	0.242265	TRUE	0.264198
RLTR10-int_dup2318:RLTR10-int:ERVK:LTR	chr16:37798349-37799241	0	0	0.264065	0	0.33982	0.465706	0	0.710787	1.23205	0	TRUE	0.264465
MMSAT4_dup1066:MMSAT4:Satellite:Satellite	chr12:24072801-24072920	0.210305	0	0.72618	0.624756	0.084955	0.248376	0.121419	0.355393	0.240401	0.942142	TRUE	0.26507
MMSAT4_dup170:MMSAT4:Satellite:Satellite	chr2:177054241-177054376	3.62775	3.92147	3.89497	4.0262	4.24775	2.14225	1.24455	3.82048	5.82971	4.41461	TRUE	0.265354
B2_Mm1a_dup17784:B2_Mm1a:B2:SINE	chr19:5854270-5854447	0	0.570395	0	0.416504	0	0.217329	0	0	0.390651	0.511448	TRUE	0.265447
L1Md_Gf_dup398:L1Md_Gf:L1:LINE	chr9:100839861-100841548	0.736066	0.570395	0.0660164	0.0694173	0	0.248376	0.607097	0.118464	2.43406	0.995979	TRUE	0.265581
B2_Mm1t_dup4404:B2_Mm1t:B2:SINE	chr4:33141426-33141618	0	0.285198	0	0	0	0.776176	0.151774	1.98428	0.811352	1.04982	TRUE	0.265768
MTA_Mm-int_dup920:MTA_Mm-int:ERVL-MaLR:LTR	chr4:146170654-146171749	4.67928	8.41333	3.69692	6.8029	5.52207	8.25851	6.89055	18.747	19.5926	24.065	TRUE	0.266934
RMER15_dup14275:RMER15:ERVL:LTR	chr13:66307756-66307968	0.157728	0.0712994	0.132033	0.555338	0.084955	0.0620941	0.0607097	0.118464	0.0901502	0.296102	TRUE	0.267382
B2_Mm1t_dup19256:B2_Mm1t:B2:SINE	chr15:4119608-4119766	0.630914	0	0.396098	0.0694173	0	0	0.394613	0.740403	0.691152	0.188428	TRUE	0.267607
L1Md_F2_dup8025:L1Md_F2:L1:LINE	chr2:128050210-128050768	0.368033	0.570395	0.72618	0.138835	0.254865	0.403612	0.273194	0.118464	1.9833	0.672958	TRUE	0.267869
ERVB4_2-LTR_MM_dup110:ERVB4_2-LTR_MM:ERVK:LTR	chr12:64156576-64156811	0.0525761	0.285198	0	0.138835	0	0.558847	0.273194	1.6585	1.0217	0.726795	TRUE	0.268108
L1Md_T_dup8533:L1Md_T:L1:LINE	chr6:106398534-106402950	0.525761	0.142599	0.264065	0.347086	0.50973	0.217329	0	0.296161	0.270451	0.32302	TRUE	0.26817
RLTR4_MM-int_dup85:RLTR4_MM-int:ERV1:LTR	chr3:67096821-67099452	0	0	0	0	0	2.94947	0	7.84827	1.71285	2.50341	TRUE	0.268317
B2_Mm1t_dup22151:B2_Mm1t:B2:SINE	chr18:36576947-36577128	1.26183	0.712994	0	0.208252	0	0	0.333903	1.33273	0.0300501	0	TRUE	0.268752
L1_Mus2_dup8906:L1_Mus2:L1:LINE	chr8:69568596-69568780	0.841218	1.21209	0	1.73543	0.764595	1.36607	1.63916	3.82048	2.46411	5.97587	TRUE	0.268831
L1Md_T_dup12548:L1Md_T:L1:LINE	chrX:41482462-41488525	0	0	0	0	0	0.248376	0.455323	1.03656	0.540901	1.29208	TRUE	0.268923
L1Md_Gf_dup394:L1Md_Gf:L1:LINE	chr9:82037400-82041285	0	0.142599	0.528131	0.485921	0.16991	0.372564	0	0.236929	0.661101	0.619122	TRUE	0.269194
L1Md_T_dup2120:L1Md_T:L1:LINE	chr2:38053724-38059697	0	1.14079	0.198049	0.347086	0	0.31047	0.607097	1.27349	1.29215	1.15749	TRUE	0.2699
L1Md_F2_dup61757:L1Md_F2:L1:LINE	chr17:94823445-94823832	0.105152	0.0712994	0.264065	0	0	0.217329	0	0.473858	0.0300501	0.376857	TRUE	0.27014
MERVL-int_dup2028:MERVL-int:ERVL:LTR	chr13:114040479-114045805	4.20609	2.13898	2.17854	0	4.16279	3.6325	0	3.73163	6.04006	4.92606	TRUE	0.270457
ERVB4_1C-LTR_Mm_dup120:ERVB4_1C-LTR_Mm:ERVK:LTR	chr3:53114044-53114196	0.630914	0.0712994	0.0660164	0.555338	0	0.31047	0	0.621938	0.1202	0.511448	TRUE	0.27087
L1Md_Gf_dup906:L1Md_Gf:L1:LINE	chr13:13720194-13721735	0.368033	0	0.0660164	1.24951	0.424775	0.558847	0.758871	1.62889	1.803	1.88428	TRUE	0.271033
L1Md_A_dup16786:L1Md_A:L1:LINE	chr19:55454839-55455060	0	0.142599	0.0660164	0.347086	0.16991	0.124188	0	0.177697	0.240401	0.080755	TRUE	0.271891
B1_Mus2_dup61164:B1_Mus2:Alu:SINE	chr15:102349313-102349457	0.788642	0.784294	1.12228	0.138835	0	0.341517	0.607097	2.31006	0.1803	1.29208	TRUE	0.273357
B2_Mm1t_dup2451:B2_Mm1t:B2:SINE	chr2:121889527-121889717	0	0.427797	0.528131	0	0.84955	0	0.364258	0.296161	0.1803	0.96906	TRUE	0.274303
L1Md_A_dup639:L1Md_A:L1:LINE	chr1:86828668-86830789	0.998947	0.570395	0.72618	0	0.84955	0.558847	0.516033	0.562706	2.1035	1.58818	TRUE	0.274825
L1Md_T_dup9282:L1Md_T:L1:LINE	chr7:43145108-43146103	0.420609	0	0.198049	0.277669	0	0.155235	0	0.177697	0.300501	0.134592	TRUE	0.275356
L1Md_F2_dup33266:L1Md_F2:L1:LINE	chrX:23324418-23325175	0.157728	0	0	0.347086	0	0.0931411	0.303549	0.740403	0.420701	0.403775	TRUE	0.27549
MurSatRep1_dup149:MurSatRep1:MurSatRep1:Unknown	chr2:175195043-175195187	3.62775	2.92328	3.89497	5.6228	6.45658	0.558847	0	0.0296161	1.71285	0.457612	TRUE	0.275896
MMSAT4_dup102:MMSAT4:Satellite:Satellite	chr2:175285018-175285568	3.36487	3.56497	3.2348	4.09562	5.77694	0.558847	0.789226	0.710787	2.37396	2.2073	TRUE	0.276465
L1_Mur1_dup6180:L1_Mur1:L1:LINE	chr14:3423765-3424130	0.578338	0.784294	1.91447	0.694173	0	1.27293	0.637452	1.06618	2.52421	3.90316	TRUE	0.276623
L1_Mur1_dup6184:L1_Mur1:L1:LINE	chr14:3663180-3663545	0.578338	0.784294	1.91447	0.208252	0	1.27293	0.637452	1.06618	2.52421	3.90316	TRUE	0.276623
L1_Mur1_dup6186:L1_Mur1:L1:LINE	chr14:3821254-3821619	0.578338	0.784294	1.91447	2.22135	0	1.27293	0.637452	1.06618	2.52421	3.90316	TRUE	0.276623
L1Md_T_dup13271:L1Md_T:L1:LINE	chrX:87838532-87844234	0.0525761	1.49729	0	2.08252	1.01946	0	1.06242	2.19159	1.65275	0.32302	TRUE	0.276624
B2_Mm1a_dup15838:B2_Mm1a:B2:SINE	chr16:17016484-17016674	0.578338	0.285198	0	0.138835	0	0.031047	0.0607097	0.0888483	0.270451	0	TRUE	0.276969
RLTR1B-int_dup491:RLTR1B-int:ERV1:LTR	chrX:123149922-123152581	59.7791	47.1289	58.0284	61.8508	78.3285	47.2846	82.6259	161.822	185.499	160.918	TRUE	0.27715
L1Md_A_dup6750:L1Md_A:L1:LINE	chr8:40368294-40373672	0.736066	0.499096	0.858213	1.31893	0.50973	0.776176	0	0.355393	1.83305	0.834468	TRUE	0.278054
ID_B1_dup7566:ID_B1:B4:SINE	chr2:10474124-10474211	0.578338	0.784294	1.71643	0.833008	0.424775	1.33502	0	2.07313	2.0434	1.07673	TRUE	0.278292
L1Md_T_dup5363:L1Md_T:L1:LINE	chr4:38577140-38583372	0	0	0	1.45776	0	0.341517	0	0.740403	0.21035	0.376857	TRUE	0.278428
RLTR4_MM-int_dup143:RLTR4_MM-int:ERV1:LTR	chr5:43208682-43216240	10.2523	1.92508	8.38408	9.71842	9.34505	0.931411	14.7525	22.9229	17.0083	20.9963	TRUE	0.278566
MMSAT4_dup1183:MMSAT4:Satellite:Satellite	chr13:65548288-65548425	0.315457	0.0712994	0.264065	0	0.16991	0.124188	0.0303549	0.236929	0.1202	0.242265	TRUE	0.278888
L1_Mur1_dup6210:L1_Mur1:L1:LINE	chr14:4866700-4867065	0.578338	0.641695	0.660164	2.22135	0	1.27293	0.637452	1.18464	2.91486	3.28404	TRUE	0.279592
L1Md_T_dup1975:L1Md_T:L1:LINE	chr2:14295771-14301436	0.368033	0.427797	0	0	0	0.434659	0	0.414626	0.991652	0.269183	TRUE	0.28013
L1Md_T_dup7593:L1Md_T:L1:LINE	chr6:10915164-10920053	0	0.285198	0	1.87427	0	0	0.333903	0.503474	0.781302	0	TRUE	0.280492
L1_Mus3_dup43082:L1_Mus3:L1:LINE	chr16:4164524-4166553	1.15668	1.14079	1.18829	1.52718	0.254865	0.807223	0.364258	0.829251	2.70451	0.96906	TRUE	0.280705
B2_Mm1t_dup16751:B2_Mm1t:B2:SINE	chr12:54895842-54895999	0.578338	0.213898	0.330082	0.416504	0.254865	0.372564	0	0.444242	0.420701	0.565285	TRUE	0.280958
B2_Mm1a_dup8991:B2_Mm1a:B2:SINE	chr9:53601079-53601263	0	0.142599	0.528131	0.555338	0	0.434659	0	0.444242	1.0217	0.188428	TRUE	0.282691
L1Md_F2_dup57953:L1Md_F2:L1:LINE	chr16:25975051-25975296	0.0525761	0.427797	0.264065	0	0.254865	0.155235	0	0	0.240401	0.349938	TRUE	0.282866
MurSatRep1_dup1664:MurSatRep1:MurSatRep1:Unknown	chr12:20636819-20636985	0.578338	0.499096	1.38634	0.208252	0.50973	0.217329	0	0.177697	0.510851	0.134592	TRUE	0.283687
MurSatRep1_dup1681:MurSatRep1:MurSatRep1:Unknown	chr12:21017279-21017445	0.578338	0.499096	1.38634	0.208252	0.50973	0.217329	0	0.177697	0.510851	0.134592	TRUE	0.283687
L1Md_F2_dup12017:L1Md_F2:L1:LINE	chr3:109461662-109462677	0.105152	0.213898	0.528131	0	0	0.341517	0	0.858867	0	0.430693	TRUE	0.284308
RLTR1B-int_dup784:RLTR1B-int:ERV1:LTR	chr19:22723818-22726072	22.2397	34.0098	15.5138	14.5776	25.6564	67.4652	68.2984	143.312	157.913	207.89	TRUE	0.285713
L1Md_T_dup13144:L1Md_T:L1:LINE	chrX:79287123-79292582	0	0.356497	0	0.555338	0	0	0.242839	0.385009	0.0901502	0.430693	TRUE	0.286792
L1Md_T_dup1960:L1Md_T:L1:LINE	chr2:13157353-13160223	0.420609	0.356497	0	0	0.33982	0.434659	0	0.0888483	1.2621	0.269183	TRUE	0.286951
L1_Mm_dup2482:L1_Mm:L1:LINE	chr9:55879617-55880906	0.578338	0.356497	0.198049	0	0	0	0.394613	0.740403	0.510851	0.215347	TRUE	0.287546
RLTR14-int_dup1184:RLTR14-int:ERV1:LTR	chr14:4428903-4429518	5.57307	3.56497	0	7.01115	4.41766	3.1668	3.15691	5.71591	8.89482	8.88305	TRUE	0.287621
B2_Mm2_dup70573:B2_Mm2:B2:SINE	chr13:93618852-93619039	0.157728	0.0712994	0.132033	0	0.084955	0.0620941	0.182129	0.325777	0.15025	0.430693	TRUE	0.28776
L1Md_F3_dup13244:L1Md_F3:L1:LINE	chr14:56453508-56455423	0.473185	0.213898	0	0.694173	0.764595	0.434659	1.15348	0.562706	2.76461	2.55724	TRUE	0.288168
B1_Mus2_dup16703:B1_Mus2:Alu:SINE	chr4:135381840-135381979	0	0.0712994	0	0	0	0.279423	0.212484	0.829251	0.480801	0.511448	TRUE	0.288299
B2_Mm1t_dup15648:B2_Mm1t:B2:SINE	chr11:85108890-85109062	1.20925	0.499096	0	0	0.594685	0.83827	0	2.36929	0.0300501	0.699877	TRUE	0.288619
MT2_Mm_dup1134:MT2_Mm:ERVL:LTR	chr7:140021338-140021798	0.736066	0.712994	0	0.902425	0.50973	0.651988	0.941001	1.95466	1.95325	1.96504	TRUE	0.289198
B3A_dup29333:B3A:B2:SINE	chr5:143415022-143415196	0.0525761	0.285198	0.198049	0.0694173	0.33982	0.248376	0.516033	0.770019	0.661101	1.37284	TRUE	0.29024
L1Md_T_dup3919:L1Md_T:L1:LINE	chr3:59625404-59631740	0	0.998192	0.660164	2.77669	0	0.993505	0.698162	2.99123	1.6227	1.58818	TRUE	0.290345
L1Md_F2_dup46265:L1Md_F2:L1:LINE	chr11:86092541-86096688	1.36698	0.712994	1.25431	0.76359	0.50973	1.39712	0	1.39196	2.43406	1.29208	TRUE	0.29051
RLTR17B_Mm_dup2317:RLTR17B_Mm:ERVK:LTR	chr2:10485058-10485140	0	0.142599	0.198049	0.76359	0.84955	0.5278	0.0910646	1.21426	0.781302	0.269183	TRUE	0.290725
L1Md_T_dup1028:L1Md_T:L1:LINE	chr1:107202719-107209560	0.368033	0.285198	0.990246	1.52718	0.50973	0.931411	1.00171	1.6585	3.24541	2.15347	TRUE	0.291219
MMSAT4_dup215:MMSAT4:Satellite:Satellite	chr2:177905922-177906389	1.15668	1.42599	2.11252	1.5966	1.6991	1.42816	0.910646	3.16892	2.40401	2.96102	TRUE	0.291328
L1Md_T_dup7531:L1Md_T:L1:LINE	chr6:6983271-6990061	0.525761	0.427797	0.990246	0.208252	1.18937	0.683035	1.60881	2.66545	3.66611	1.99196	TRUE	0.292295
L1_Mm_dup3884:L1_Mm:L1:LINE	chr11:20596678-20598128	0	1.85378	0.858213	2.15194	1.6991	2.1112	0	0.444242	4.65776	2.53032	TRUE	0.293246
RMER17D2_dup425:RMER17D2:ERVK:LTR	chr5:65988645-65988895	0	0.0712994	0	0.208252	0	0.186282	0.151774	0.385009	0.540901	0.296102	TRUE	0.293266
B2_Mm1t_dup5465:B2_Mm1t:B2:SINE	chr4:134084498-134084685	1.15668	0.142599	0.264065	0.971842	1.10441	0.248376	0	0.414626	0.240401	0.242265	TRUE	0.293391
L1Md_F2_dup58660:L1Md_F2:L1:LINE	chr16:56105169-56106957	0.368033	0.285198	0.264065	0	0	0.558847	0.546387	0.681171	1.803	1.50743	TRUE	0.293453
MTA_Mm_dup9052:MTA_Mm:ERVL-MaLR:LTR	chrX:138604852-138605244	0.105152	0.784294	0.0660164	0	0.254865	0.031047	0.151774	0.0888483	0.300501	0.269183	TRUE	0.293999
MMSAT4_dup1286:MMSAT4:Satellite:Satellite	chr13:66670580-66670719	0.946371	0.998192	1.51838	2.42961	0.67964	0.558847	0	0.236929	0.510851	1.26516	TRUE	0.294005
L1Md_T_dup3824:L1Md_T:L1:LINE	chr3:49071024-49077312	0	0	0	0.833008	0	0.248376	0	0.53309	0.360601	0	TRUE	0.294225
B2_Mm2_dup10206:B2_Mm2:B2:SINE	chr2:143974979-143975158	0.210305	0.213898	0.132033	0.138835	0	0.031047	0.151774	0.385009	0.0300501	0.242265	TRUE	0.29438
B1_Mus1_dup77108:B1_Mus1:Alu:SINE	chr14:48149158-48149292	0.157728	0	0	0	0	0	0.333903	0.740403	0.270451	0.188428	TRUE	0.294597
L1Md_F2_dup50573:L1Md_F2:L1:LINE	chr13:49594182-49600110	0.998947	0.855593	0.990246	0.971842	0.67964	0.5278	0	0	1.35225	0.538367	TRUE	0.295155
B2_Mm1a_dup3341:B2_Mm1a:B2:SINE	chr4:43971383-43971541	0.736066	0.570395	0	0.347086	0	0	0.182129	0	0.0601001	0.592203	TRUE	0.295186
B2_Mm1a_dup8361:B2_Mm1a:B2:SINE	chr8:104134041-104134233	0	0	0	0	0.84955	0.403612	0	0.385009	0.811352	0.242265	TRUE	0.296186
MMERGLN-int_dup223:MMERGLN-int:ERV1:LTR	chr8:121833275-121840834	267.613	363.627	362.628	402.065	441.936	287.992	537.949	1014.53	1081.5	832.557	TRUE	0.297279
L1_Mus1_dup20816:L1_Mus1:L1:LINE	chr13:17539021-17543490	0.0525761	0.213898	0.0660164	0.347086	0.084955	0.031047	0.0607097	0.177697	0.1202	0.0269183	TRUE	0.297621
B2_Mm1t_dup4679:B2_Mm1t:B2:SINE	chr4:59654207-59654399	0	0.142599	0	1.66602	0	0	0.151774	0.325777	0.21035	0	TRUE	0.298068
MurSatRep1_dup1582:MurSatRep1:MurSatRep1:Unknown	chr12:19406325-19407047	0	0	0.594147	0.0694173	0.084955	0.217329	0	0.118464	0.0300501	0.619122	TRUE	0.298084
B1_Mus2_dup1541:B1_Mus2:Alu:SINE	chr1:78434168-78434304	0.0525761	0	0.0660164	0	0.764595	0.186282	0	0.266545	0.390651	0	TRUE	0.298332
MMSAT4_dup980:MMSAT4:Satellite:Satellite	chr12:20243476-20243614	0	0.0712994	0	0.833008	0	0	0.182129	0.266545	0.240401	0.134592	TRUE	0.29866
B2_Mm1a_dup5333:B2_Mm1a:B2:SINE	chr5:121738459-121738645	0	0.213898	0.924229	0	0	0	0.121419	0.236929	0	0.188428	TRUE	0.299808
RLTR14-int_dup1165:RLTR14-int:ERV1:LTR	chr14:4123939-4124554	0.368033	2.13898	2.17854	0.971842	3.48315	1.76968	1.45703	3.82048	2.88481	4.57612	TRUE	0.300225
B2_Mm1a_dup8853:B2_Mm1a:B2:SINE	chr9:35201245-35201400	0.157728	0.427797	0	0.902425	0.084955	0.403612	0.121419	1.27349	0.21035	0.349938	TRUE	0.300438
L1Md_T_dup11687:L1Md_T:L1:LINE	chr9:75917938-75924788	0	0	0.264065	0.694173	0	0	0.182129	0	0.420701	0.215347	TRUE	0.300463
MTA_Mm-int_dup515:MTA_Mm-int:ERVL-MaLR:LTR	chr2:177190535-177191612	7.0452	13.1191	16.306	15.966	9.85478	13.9401	15.2685	29.3496	26.6244	45.9765	TRUE	0.300576
L1Md_Gf_dup218:L1Md_Gf:L1:LINE	chr5:28604081-28605496	0	0	0	0	0	0.589894	0.849936	1.59927	2.85476	0.565285	TRUE	0.30084
L1Md_T_dup5898:L1Md_T:L1:LINE	chr4:88376198-88382182	1.05152	2.28158	0.198049	1.24951	0.594685	0.496753	1.97307	2.04351	3.06511	3.49938	TRUE	0.300886
MurSatRep1_dup280:MurSatRep1:MurSatRep1:Unknown	chr2:177541718-177541972	1.15668	1.14079	2.11252	2.84611	1.44423	0.558847	0.182129	0	1.2621	1.319	TRUE	0.301
B1_Mus1_dup68527:B1_Mus1:Alu:SINE	chr12:18875248-18875379	0.0525761	0.285198	0.132033	0.138835	0.16991	0.0620941	0.0303549	0.177697	0.0901502	0.0538367	TRUE	0.30123
B1_Mus1_dup68567:B1_Mus1:Alu:SINE	chr12:19409322-19409453	0.0525761	0.285198	0.132033	0.138835	0.16991	0.0620941	0.0303549	0.177697	0.0901502	0.0538367	TRUE	0.30123
MurSatRep1_dup277:MurSatRep1:MurSatRep1:Unknown	chr2:177475942-177476145	1.20925	0.998192	1.38634	0	2.97342	0.465706	0.394613	0.592322	0.811352	1.58818	TRUE	0.301349
L1Md_F3_dup15395:L1Md_F3:L1:LINE	chr17:94785761-94790951	1.84017	1.63989	1.18829	0	1.10441	0.5278	0	0.414626	0.961602	0.457612	TRUE	0.301538
L1Md_T_dup19257:L1Md_T:L1:LINE	chr14:11904064-11904771	0.105152	0.0712994	0.396098	0	0	0.124188	0.151774	0.355393	0.360601	0.242265	TRUE	0.301664
L1_Mus1_dup20905:L1_Mus1:L1:LINE	chr13:25203554-25203742	0.0525761	0.142599	0	0	0.16991	0.217329	0.121419	0.325777	0.390651	0.457612	TRUE	0.302065
L1Md_T_dup10166:L1Md_T:L1:LINE	chr8:9145137-9145652	0.736066	0.427797	0.330082	0.555338	0	0.248376	0.546387	0.977332	0.901502	0.861387	TRUE	0.303162
L1Md_Gf_dup32:L1Md_Gf:L1:LINE	chr1:97422440-97423534	1.41956	1.21209	1.58439	0.416504	0.67964	1.73863	3.33903	4.70896	7.99332	4.79146	TRUE	0.303323
L1Md_T_dup16161:L1Md_T:L1:LINE	chr10:71585179-71591843	0.736066	0.213898	0.924229	1.31893	0	0.620941	1.06242	0.9181	3.00501	1.85737	TRUE	0.30402
B2_Mm1a_dup11118:B2_Mm1a:B2:SINE	chr10:117652813-117652972	0.368033	0.570395	0.462115	0.347086	0.084955	0.279423	0	0.325777	0.390651	0.242265	TRUE	0.3042
L1Md_A_dup15924:L1Md_A:L1:LINE	chr17:58730506-58735840	0.420609	0	0	0	0.33982	0.031047	0.424968	0.177697	0.901502	0.48453	TRUE	0.304314
ID_B1_dup52740:ID_B1:B4:SINE	chr8:104091480-104091607	0	0.0712994	0.132033	0.138835	0	0.031047	0.273194	0.414626	0.330551	0.296102	TRUE	0.30472
L1Md_T_dup5764:L1Md_T:L1:LINE	chr4:77500003-77504782	0	0.285198	0.396098	0	0	0.403612	0	0.770019	0.420701	0.188428	TRUE	0.305063
L1Md_T_dup4105:L1Md_T:L1:LINE	chr3:73327958-73328369	0	0	0.198049	0.138835	0	0.248376	0.455323	0.710787	0.691152	0.995979	TRUE	0.305649
MERVL-int_dup302:MERVL-int:ERVL:LTR	chr2:128481100-128486425	0	0.285198	0	0	0	0.776176	0	0.296161	1.35225	0.995979	TRUE	0.305689
MTA_Mm-int_dup1313:MTA_Mm-int:ERVL-MaLR:LTR	chr7:42119841-42120937	0	0.0712994	0	0	0	0	0.546387	0.562706	0.510851	0.780632	TRUE	0.306526
PB1D9_dup12758:PB1D9:Alu:SINE	chr8:20285044-20285162	0.788642	0.712994	0.72618	0.485921	0.594685	0	0.667807	0.681171	0.721202	0.861387	TRUE	0.306758
URR1B_dup11811:URR1B:hAT-Charlie:DNA	chr12:23250839-23251061	0	0.213898	0.594147	0.347086	0.084955	0.0620941	0	0.0296161	0.1803	0	TRUE	0.307338
RMER16-int_dup378:RMER16-int:ERVK:LTR	chr2:177939488-177939825	0.315457	0	0	1.31893	0.50973	0	0.151774	0	0.270451	0.242265	TRUE	0.307494
Lx3_Mus_dup9957:Lx3_Mus:L1:LINE	chr14:6099320-6099454	0.368033	0.427797	0	0.138835	0.254865	0	0.212484	0.177697	0.270451	0.269183	TRUE	0.307634
L1Md_Gf_dup358:L1Md_Gf:L1:LINE	chr8:9551191-9552819	0.210305	0.213898	0	0	0.084955	0.248376	0.0607097	0.355393	0.661101	0.0269183	TRUE	0.307642
MurSatRep1_dup1959:MurSatRep1:MurSatRep1:Unknown	chr13:62518984-62520049	0	0.0712994	0	0.485921	0	0.248376	0	0.325777	0	0.511448	TRUE	0.307958
MT2B2_dup236:MT2B2:ERVL:LTR	chr2:14175448-14175569	0.315457	0	0	0.138835	0	0.341517	0.0607097	0.266545	0.601001	0.48453	TRUE	0.308548
B2_Mm2_dup20645:B2_Mm2:B2:SINE	chr4:135732291-135732461	0.473185	0.712994	0.198049	0.208252	0.16991	0.0620941	0.212484	0.296161	0.330551	0.296102	TRUE	0.308589
L1Md_T_dup19901:L1Md_T:L1:LINE	chr14:91671092-91677540	0.420609	0.998192	0.396098	0	0.254865	0.372564	0	0	0.871452	0.376857	TRUE	0.309241
L1Md_T_dup4737:L1Md_T:L1:LINE	chr3:141603656-141610626	0	0.855593	0	0.347086	0	0	0.242839	0.148081	0.420701	0.242265	TRUE	0.309927
MMSAT4_dup1265:MMSAT4:Satellite:Satellite	chr13:66528552-66529424	2.2082	2.21028	3.96098	4.58154	2.80351	1.67654	0	0.503474	1.83305	3.25712	TRUE	0.310147
B2_Mm1a_dup7273:B2_Mm1a:B2:SINE	chr7:80474784-80474940	1.1041	1.28339	0	1.38835	0.594685	0.83827	0.485678	1.92505	1.59265	0.888305	TRUE	0.310692
B2_Mm1t_dup11702:B2_Mm1t:B2:SINE	chr9:75450952-75451110	0.473185	0.926892	0.594147	0	0	0	0.333903	0.118464	0.991652	0	TRUE	0.310902
B2_Mm1a_dup14569:B2_Mm1a:B2:SINE	chr14:45569470-45569658	0.315457	0.356497	0	0	0	0	0.273194	0.444242	0.300501	0.16151	TRUE	0.311381
MMSAT4_dup213:MMSAT4:Satellite:Satellite	chr2:177832706-177832999	1.15668	0.499096	0.264065	0.971842	0.50973	0	0.576742	0.829251	0.540901	0.538367	TRUE	0.311906
MurSatRep1_dup189:MurSatRep1:MurSatRep1:Unknown	chr2:175978618-175978922	6.15141	4.99096	7.39383	0.971842	8.41054	2.76319	2.42839	5.03474	6.46076	5.65285	TRUE	0.312298
L1_Mus1_dup6800:L1_Mus1:L1:LINE	chr4:147684822-147685119	0.420609	0.784294	0	0	0.254865	0.0931411	1.24455	2.04351	1.5626	0.80755	TRUE	0.312535
IAPEz-int_dup975:IAPEz-int:ERVK:LTR	chr2:154354657-154355928	1.26183	4.99096	3.16879	1.38835	1.44423	2.60795	0	3.76125	2.43406	2.39573	TRUE	0.31288
L1Md_Gf_dup5:L1Md_Gf:L1:LINE	chr1:11625777-11627016	0.315457	0	0.264065	0.208252	0.084955	0.776176	0.394613	1.68812	1.65275	0.511448	TRUE	0.313129
MER63D_dup706:MER63D:hAT-Blackjack:DNA	chr12:20223597-20223693	0.0525761	0.427797	0.264065	0.138835	0.254865	0.0620941	0	0	0.15025	0.0538367	TRUE	0.313366
L1Md_A_dup9486:L1Md_A:L1:LINE	chrX:129806100-129811316	0	0.998192	0.198049	0	0.764595	0.217329	0.546387	0.799635	0.901502	0.80755	TRUE	0.31349
L1Md_T_dup1408:L1Md_T:L1:LINE	chr1:139716332-139722200	2.62881	4.70576	3.30082	3.54028	2.6336	5.43323	4.34074	6.69324	15.7462	9.66368	TRUE	0.313509
B2_Mm1a_dup13223:B2_Mm1a:B2:SINE	chr12:69726243-69726402	0	0	0	0.416504	0.16991	0.186282	0	0.325777	0.15025	0.134592	TRUE	0.313944
ORR1A0_dup2035:ORR1A0:ERVL-MaLR:LTR	chr18:35472168-35472514	0.210305	0	0	0	0	0.496753	0	0.296161	0.631051	0.699877	TRUE	0.314106
RMER10A_dup560:RMER10A:ERVL:LTR	chr2:176627657-176627826	0	0.213898	0	0.347086	0.84955	0	0.0910646	0.177697	0.1202	0	TRUE	0.314382
L1Md_T_dup5:L1Md_T:L1:LINE	chr1:158331520-158337584	0	0.499096	0	0	0	0.372564	0	0.947716	0.270451	0	TRUE	0.314487
L1Md_F2_dup7463:L1Md_F2:L1:LINE	chr2:104919989-104925124	0.420609	0	1.12228	0.416504	0.67964	0.248376	0	0	0.811352	0	TRUE	0.314688
L1Md_T_dup19691:L1Md_T:L1:LINE	chr14:72647508-72647940	0.105152	0	0.198049	0.277669	0.084955	0	0.273194	0.385009	0.21035	0.296102	TRUE	0.31492
Lx7_dup7257:Lx7:L1:LINE	chr3:127149312-127149654	0.368033	0.142599	0.0660164	0.0694173	0.16991	0.496753	0.546387	0.858867	1.1419	1.39975	TRUE	0.315133
IMPB_01_dup12723:IMPB_01:Satellite:Satellite	chr9:28125473-28125710	0.0525761	0.0712994	0.264065	0	0.084955	0.031047	0.424968	0.503474	0.390651	0.592203	TRUE	0.315167
MTA_Mm_dup11245:MTA_Mm:ERVL-MaLR:LTR	chr12:55688341-55688646	0.525761	0.285198	0.462115	0.485921	0	0.217329	0.0303549	0.207313	0.330551	0.269183	TRUE	0.315234
L1_Mus1_dup19619:L1_Mus1:L1:LINE	chr12:19303880-19304285	3.3123	3.13717	3.49887	2.91553	3.22829	0.931411	2.00342	3.05046	3.06511	3.44555	TRUE	0.315271
MurSatRep1_dup244:MurSatRep1:MurSatRep1:Unknown	chr2:177054317-177054512	1.05152	0.926892	1.84846	1.45776	0.594685	0.496753	0.0910646	0.296161	0.540901	1.07673	TRUE	0.315407
L1Md_Gf_dup979:L1Md_Gf:L1:LINE	chr15:44794988-44796070	0.157728	0.0712994	0.132033	0	0	0.279423	0.0910646	0.385009	0.360601	0.457612	TRUE	0.315945
B2_Mm1a_dup7150:B2_Mm1a:B2:SINE	chr7:49591325-49591483	0.68349	0.784294	0.660164	0.416504	1.27432	0	0.303549	0.503474	0.480801	0	TRUE	0.316285
B2_Mm1t_dup1827:B2_Mm1t:B2:SINE	chr2:40888537-40888722	0.210305	0	0.858213	0	0.16991	0.031047	0.0607097	0	0.270451	0.0269183	TRUE	0.3164
B3_dup119622:B3:B2:SINE	chr14:6759088-6759289	0.0525761	0.0712994	0	0.0694173	0	0.558847	0	0.562706	0.330551	0.915223	TRUE	0.316717
L1Md_T_dup11271:L1Md_T:L1:LINE	chr9:10701207-10707437	0.946371	0	0.198049	0	0	0.5278	0	0.414626	1.0217	0.269183	TRUE	0.317034
MMSAT4_dup703:MMSAT4:Satellite:Satellite	chr8:71932800-71932937	0.105152	0.285198	0.132033	0.485921	0.424775	0.372564	0.182129	0.266545	0.691152	0.834468	TRUE	0.317064
B2_Mm1a_dup11396:B2_Mm1a:B2:SINE	chr11:19968309-19968466	1.84017	1.71119	0.792196	0.0694173	0.16991	0.217329	0.333903	1.48081	0.0300501	0.269183	TRUE	0.317179
L1Md_T_dup12340:L1Md_T:L1:LINE	chrX:25932751-25938206	0	0.356497	0.72618	0	0.33982	0	0.424968	0.207313	0.570951	0.592203	TRUE	0.317469
L1Md_F_dup2149:L1Md_F:L1:LINE	chrX:84459374-84461025	0.473185	0	0	0.277669	0.084955	0.248376	0	0.236929	0.240401	0.32302	TRUE	0.31764
B2_Mm1a_dup7340:B2_Mm1a:B2:SINE	chr7:96741670-96741862	0.0525761	0.213898	1.12228	0.694173	2.37874	0.434659	0	0.770019	0.360601	0.269183	TRUE	0.317765
MuLV-int_dup62:MuLV-int:ERV1:LTR	chr4:134162051-134163888	0.525761	0	0.72618	0.347086	0	0.745129	1.60881	2.45814	3.12521	1.99196	TRUE	0.317922
L1Md_T_dup9275:L1Md_T:L1:LINE	chr7:42683723-42684924	0.630914	0.855593	0.528131	0.416504	0.254865	0.589894	1.42668	1.18464	2.79466	2.50341	TRUE	0.318153
MT2_Mm_dup1011:MT2_Mm:ERVL:LTR	chr7:25501651-25502143	0	0.142599	0.330082	0	0	0	0.607097	0.0592322	0.330551	1.56126	TRUE	0.318219
ERVB4_1C-LTR_Mm_dup889:ERVB4_1C-LTR_Mm:ERVK:LTR	chr17:32375739-32375860	0	1.21209	1.78244	0	1.18937	0.248376	1.03207	1.45119	0.480801	2.18039	TRUE	0.318357
L1Md_T_dup57:L1Md_T:L1:LINE	chr1:6564539-6568206	0.525761	0.641695	0.132033	0.277669	0.254865	0.217329	0.333903	0.414626	0.601001	0.753713	TRUE	0.318486
RMER1C_dup4665:RMER1C:RMER1C:Other	chr11:4574067-4574410	0.105152	0.142599	0.396098	0.208252	0.084955	0.155235	0.0607097	0.0592322	0.390651	0.242265	TRUE	0.318796
MMSAT4_dup127:MMSAT4:Satellite:Satellite	chr2:175977940-175978077	7.09778	5.20486	7.72392	8.88541	5.94685	1.89387	2.91407	3.87971	6.97162	4.5492	TRUE	0.318935
MERVL-int_dup2155:MERVL-int:ERVL:LTR	chr15:4939020-4939365	0	0	0	0	0	0.5278	0	0.947716	0.390651	0.349938	TRUE	0.319233
Lx8_dup34550:Lx8:L1:LINE	chr12:20205153-20205276	0.736066	0.926892	0.660164	1.11068	0.84955	1.76968	1.30526	3.05046	2.73456	4.01083	TRUE	0.320123
L1Md_T_dup1173:L1Md_T:L1:LINE	chr1:115799434-115804570	0.420609	0.784294	1.18829	1.45776	0.16991	0.900364	0	0.592322	1.1419	1.13057	TRUE	0.320388
MTA_Mm-int_dup923:MTA_Mm-int:ERVL-MaLR:LTR	chr4:147033222-147034316	8.78022	9.91062	6.79969	6.24756	4.3327	14.4369	11.8991	20.139	29.389	34.0248	TRUE	0.321023
MTA_Mm-int_dup1454:MTA_Mm-int:ERVL-MaLR:LTR	chr8:54512858-54513955	0.262881	0.213898	0.132033	0.138835	0.16991	0	1.09277	0	1.17195	2.28806	TRUE	0.321456
L1Md_Gf_dup273:L1Md_Gf:L1:LINE	chr6:60312125-60313005	0.578338	1.21209	1.65041	1.80485	0.084955	2.42167	2.18555	4.26472	5.01836	5.30291	TRUE	0.321481
L1Md_T_dup20203:L1Md_T:L1:LINE	chr14:115958264-115965073	1.36698	3.70757	1.18829	4.37329	1.44423	2.01806	4.52287	3.52432	11.7496	5.38367	TRUE	0.322013
B2_Mm1a_dup17601:B2_Mm1a:B2:SINE	chr18:76021277-76021425	0.525761	0.142599	0.462115	0.208252	0.594685	0.341517	0.758871	1.54004	1.23205	0.699877	TRUE	0.322219
IAPEz-int_dup3539:IAPEz-int:ERVK:LTR	chr9:33154141-33160570	0	0	2.50862	0	0.254865	1.21083	0	0	2.01335	1.80353	TRUE	0.322423
RLTR1B-int_dup83:RLTR1B-int:ERV1:LTR	chr2:150702450-150705125	26.919	12.4061	9.17628	15.2024	16.5662	30.6434	51.9372	77.8608	85.7629	96.5292	TRUE	0.322561
MMETn-int_dup243:MMETn-int:ERVK:LTR	chr6:88567944-88568953	0	2.92328	0	0	0	1.86282	0.151774	1.56965	1.6227	3.14945	TRUE	0.322725
RLTR19-int_dup1469:RLTR19-int:ERVK:LTR	chr10:59807415-59808013	0	0.213898	0.462115	0.208252	0.254865	0	0.151774	0.236929	0.240401	0	TRUE	0.322928
MTA_Mm_dup11037:MTA_Mm:ERVL-MaLR:LTR	chr12:22597885-22598279	0.157728	0.142599	0	0	0	0.124188	0.212484	0.651555	0.0300501	0.376857	TRUE	0.323005
L1_Mus1_dup18225:L1_Mus1:L1:LINE	chr10:82848430-82849701	0	0.213898	0.0660164	0	0	0.372564	0	0.355393	0.300501	0.511448	TRUE	0.323746
L1Md_T_dup9778:L1Md_T:L1:LINE	chr7:92598437-92604624	0	0.499096	0.792196	0.555338	0	0.434659	0	0.236929	0.931552	0.188428	TRUE	0.32455
ERVB7_1-LTR_MM_dup11:ERVB7_1-LTR_MM:ERVK:LTR	chr1:11624577-11624893	0.210305	2.06768	3.56488	1.24951	10.8742	3.07366	0	6.87094	2.52421	0.188428	TRUE	0.324818
L1Md_A_dup11932:L1Md_A:L1:LINE	chr10:91023925-91027417	0.262881	0.570395	0	0	0	0.714082	0.546387	1.06618	1.6227	1.23824	TRUE	0.324984
RLTR48A_dup456:RLTR48A:ERV1:LTR	chr13:66413344-66413624	0	0	0	0	0.254865	0.248376	0	0.53309	0.240401	0	TRUE	0.325084
RLTR14-int_dup1115:RLTR14-int:ERV1:LTR	chr14:3068036-3068651	0.262881	3.06588	2.97074	0.208252	4.41766	3.1668	3.15691	5.71591	8.62437	5.30291	TRUE	0.325642
URR1A_dup13839:URR1A:hAT-Charlie:DNA	chr14:3955276-3955498	0.105152	0.356497	0.528131	3.54028	0	0.434659	0.546387	0.118464	0.420701	2.50341	TRUE	0.325991
L1Md_T_dup16805:L1Md_T:L1:LINE	chr11:29438717-29439791	1.20925	1.35469	1.45236	1.73543	1.35928	1.70759	2.823	3.02084	7.03172	3.98391	TRUE	0.326218
L1Md_T_dup10469:L1Md_T:L1:LINE	chr8:40477777-40480819	0	0.427797	0	0	0	0.434659	0	0.355393	0.721202	0.269183	TRUE	0.326358
IAPLTR2_Mm_dup193:IAPLTR2_Mm:ERVK:LTR	chr2:156210983-156211460	0.210305	0.142599	2.24456	1.45776	0.934505	0.620941	0	0	1.3823	0.538367	TRUE	0.326572
ORR1A4-int_dup1008:ORR1A4-int:ERVL-MaLR:LTR	chr13:66335637-66337013	0	0	0	0	0	0	0.546387	0.621938	0.691152	0.376857	TRUE	0.326588
MurSatRep1_dup187:MurSatRep1:MurSatRep1:Unknown	chr2:175978078-175978166	9.56886	8.91243	11.1568	13.1199	11.384	3.88088	3.49081	6.72286	8.83472	7.24103	TRUE	0.326603
L1Md_F2_dup11812:L1Md_F2:L1:LINE	chr3:98726811-98729490	0	0	0.396098	0.416504	0	0.31047	0	0.148081	0.270451	0.538367	TRUE	0.327361
Lx2B_dup4805:Lx2B:L1:LINE	chr13:66328168-66328497	0.368033	0.0712994	0	0.0694173	0.084955	0.217329	0.364258	1.06618	0.480801	0.242265	TRUE	0.327762
IAPA_MM-int_dup67:IAPA_MM-int:ERVK:LTR	chr9:121025096-121025338	0.210305	0	0	0	0	0.341517	0.151774	0.414626	0.240401	0.861387	TRUE	0.327936
L1Md_T_dup10990:L1Md_T:L1:LINE	chr8:85948363-85954013	0	0.998192	0	0	0	0.403612	0	0.473858	0.1202	0.64604	TRUE	0.328048
L1Md_T_dup740:L1Md_T:L1:LINE	chr1:76459995-76465425	0	0	0.924229	1.38835	0.424775	0	1.24455	0	1.803	2.01888	TRUE	0.328163
MTA_Mm-int_dup497:MTA_Mm-int:ERVL-MaLR:LTR	chr2:176683001-176683988	4.4164	3.42237	3.89497	6.31697	5.77694	5.58847	2.67123	11.9945	7.30217	6.05663	TRUE	0.328262
IAPLTR1a_Mm_dup1373:IAPLTR1a_Mm:ERVK:LTR	chr14:50880211-50880548	0.368033	0.213898	0	0	0	0.0931411	0.121419	0.266545	0.390651	0	TRUE	0.328732
L1Md_T_dup7185:L1Md_T:L1:LINE	chr5:84371713-84378789	0.157728	0.855593	0	0	0.16991	0.279423	0.485678	0.503474	0.811352	1.0229	TRUE	0.329276
L1Md_A_dup9599:L1Md_A:L1:LINE	chrX:144347182-144347848	0.736066	0.926892	0.528131	0.347086	0.16991	1.02455	0.758871	1.98428	1.9833	1.48051	TRUE	0.329319
MT2_Mm_dup1780:MT2_Mm:ERVL:LTR	chr11:61548836-61549201	1.15668	0.784294	0.792196	0.902425	1.01946	1.42816	1.882	4.20549	2.94491	2.96102	TRUE	0.329333
L1Md_T_dup3273:L1Md_T:L1:LINE	chr3:112064654-112068362	0	0.641695	0.198049	0.208252	0	0	0.424968	0	1.0818	0.215347	TRUE	0.3295
L1Md_T_dup19516:L1Md_T:L1:LINE	chr14:44233310-44238315	0.946371	0.855593	0.72618	0.971842	0.424775	0.217329	0.880291	0.799635	1.59265	0.942142	TRUE	0.330551
MTA_Mm_dup15274:MTA_Mm:ERVL-MaLR:LTR	chr19:15956522-15956918	0	0.641695	0.264065	0.208252	0.084955	0.217329	0	0	0.390651	0.269183	TRUE	0.33068
L1Md_T_dup15797:L1Md_T:L1:LINE	chr10:32918529-32924796	0	0.0712994	0.132033	0	0.764595	0.186282	1.00171	0.829251	1.59265	1.18441	TRUE	0.330714
B2_Mm1t_dup10142:B2_Mm1t:B2:SINE	chr8:40498230-40498413	0.368033	0.213898	0.132033	0.416504	0	0.0620941	0	0	0	0.188428	TRUE	0.330793
L1Md_F2_dup19885:L1Md_F2:L1:LINE	chr5:108182911-108183901	0.105152	0.142599	0	0	0.254865	0	0.455323	0.592322	0.330551	0.457612	TRUE	0.330988
B2_Mm1t_dup5580:B2_Mm1t:B2:SINE	chr4:137635583-137635764	0.578338	0	0	0	0.33982	0.155235	0	0.177697	0.21035	0.080755	TRUE	0.331862
L1Md_T_dup21747:L1Md_T:L1:LINE	chr16:74205833-74211277	0.315457	0.0712994	0.924229	0.208252	0.084955	0.589894	0.546387	0.266545	2.58431	0.565285	TRUE	0.332859
MTA_Mm-int_dup523:MTA_Mm-int:ERVL-MaLR:LTR	chr2:177477916-177478904	5.57307	9.12633	6.93172	6.24756	7.22117	7.45129	7.40659	13.4457	15.3856	15.8011	TRUE	0.33304
MERVL-int_dup2060:MERVL-int:ERVL:LTR	chr14:33221333-33222711	0	2.13898	1.51838	0	2.12387	0.745129	1.63916	2.48775	2.97496	1.69586	TRUE	0.333157
RLTR45-int_dup163:RLTR45-int:ERVK:LTR	chr2:179612452-179612733	0.105152	0.285198	0	0.555338	0.254865	0.155235	0.0303549	0.266545	0.1803	0.107673	TRUE	0.334234
L1_Mm_dup2356:L1_Mm:L1:LINE	chr8:79753432-79756456	1.57728	0.712994	1.25431	0.694173	0.424775	1.08665	0.910646	1.59927	2.34391	2.01888	TRUE	0.334443
L1Md_A_dup7439:L1Md_A:L1:LINE	chr9:3674708-3680080	0.420609	1.42599	0.792196	0.624756	0.594685	0.124188	0.333903	0.414626	0.871452	0.080755	TRUE	0.334541
L1Md_F3_dup15103:L1Md_F3:L1:LINE	chr17:50940230-50942582	0	0.285198	0	0.76359	0	0	0.151774	0.0888483	0.1202	0.242265	TRUE	0.335302
B2_Mm1a_dup15757:B2_Mm1a:B2:SINE	chr16:11157957-11158117	0	1.92508	0	0.624756	0	0.620941	0	0.977332	0.300501	0.565285	TRUE	0.335701
L1Md_Gf_dup135:L1Md_Gf:L1:LINE	chr3:53186390-53187251	0.368033	0.641695	0.0660164	0.208252	0.084955	0.589894	0.971355	1.98428	2.0434	0.592203	TRUE	0.336391
B2_Mm1a_dup10781:B2_Mm1a:B2:SINE	chr10:64708677-64708858	0.262881	0	0	0	0.254865	0.155235	0.151774	0.53309	0.240401	0.134592	TRUE	0.336486
L1Md_T_dup21318:L1Md_T:L1:LINE	chr16:41054276-41060891	1.15668	2.28158	1.98049	1.18009	0	1.5213	1.97307	2.04351	5.46911	2.79951	TRUE	0.336998
MMERGLN_LTR_dup206:MMERGLN_LTR:ERV1:LTR	chr8:121832845-121833274	22.9758	32.156	36.5071	45.1212	43.7518	20.9257	34.2706	52.0059	67.3422	43.4462	TRUE	0.337127
L1_Mus1_dup15120:L1_Mus1:L1:LINE	chrX:84875516-84875854	0.420609	0.356497	0.132033	0.555338	0.84955	0.217329	0.121419	0.207313	0.330551	0.457612	TRUE	0.337938
L1Md_T_dup9480:L1Md_T:L1:LINE	chr7:61182304-61188641	0.68349	1.85378	0.396098	0	0	0.496753	2.09449	2.22121	2.88481	2.50341	TRUE	0.338097
B2_Mm1a_dup17165:B2_Mm1a:B2:SINE	chr18:6084070-6084173	1.68244	1.28339	1.32033	0.902425	2.12387	0.496753	0.789226	0.947716	2.07345	0.753713	TRUE	0.338187
B2_Mm1a_dup397:B2_Mm1a:B2:SINE	chr1:84865419-84865592	0.473185	0	0.330082	0.277669	0	0.434659	0.0607097	0.740403	0.601001	0.107673	TRUE	0.338964
L1_Mm_dup461:L1_Mm:L1:LINE	chr2:44795049-44795222	0.0525761	0.499096	0.528131	0	0.084955	0.31047	0.667807	0.829251	1.41235	0.619122	TRUE	0.339041
L1Md_T_dup1792:L1Md_T:L1:LINE	chr1:177929391-177935793	0	0.142599	1.32033	0.555338	0	0.962458	1.24455	1.51042	2.97496	1.96504	TRUE	0.339159
RLTR19-int_dup234:RLTR19-int:ERVK:LTR	chr2:75665393-75665763	32.7024	39.999	68.459	62.3367	45.7907	4.25344	7.98333	0	12.8013	22.9613	TRUE	0.33917
MurSatRep1_dup186:MurSatRep1:MurSatRep1:Unknown	chr2:175977862-175977939	1.52471	1.99638	3.36683	3.40145	2.88847	1.0556	0.667807	1.45119	1.53255	2.04579	TRUE	0.339492
B2_Mm1a_dup4261:B2_Mm1a:B2:SINE	chr4:140683415-140683606	0	0.142599	1.12228	0.485921	0	0	0.819581	1.27349	0.631051	0.48453	TRUE	0.339751
L1_Mus1_dup7083:L1_Mus1:L1:LINE	chr5:19534041-19535961	0.157728	0.285198	0.264065	0.0694173	0.254865	0.0620941	0.0607097	0.207313	0.15025	0	TRUE	0.340008
L1Md_A_dup4371:L1Md_A:L1:LINE	chr5:14633817-14635136	0.105152	0.356497	0.132033	0.416504	0	0.217329	0.0910646	0.355393	0.540901	0	TRUE	0.340419
L1Md_F2_dup42115:L1Md_F2:L1:LINE	chr10:7450261-7454928	0.473185	1.06949	1.05626	0.833008	0	0.620941	0	0.473858	0.601001	0.726795	TRUE	0.340794
MTD_dup12766:MTD:ERVL-MaLR:LTR	chr5:9330329-9330416	0	0.0712994	0	0.0694173	0.16991	0.186282	0.242839	0.681171	0.240401	0.32302	TRUE	0.340884
B2_Mm1t_dup17774:B2_Mm1t:B2:SINE	chr13:53190369-53190554	0.578338	0.213898	0	0	0.84955	0	0.394613	0	0.871452	0.269183	TRUE	0.341646
IAPLTR1_Mm_dup1099:IAPLTR1_Mm:ERVK:LTR	chr12:73310993-73311374	0	0.213898	0	0	1.27432	0.124188	0	0.118464	0.240401	0	TRUE	0.34171
L1Md_T_dup13468:L1Md_T:L1:LINE	chrX:98591847-98595285	0	0.570395	0.330082	0.76359	0	0.341517	0.0607097	0.207313	0.631051	0.32302	TRUE	0.341889
B1_Mur4_dup32837:B1_Mur4:Alu:SINE	chr14:4459592-4459736	0.105152	0.0712994	0.198049	0.0694173	0.16991	0.0931411	0.182129	0.325777	0.360601	0.107673	TRUE	0.342105
B1_Mus1_dup51211:B1_Mus1:Alu:SINE	chrX:103308620-103308765	0.105152	0	0	0	0	0	0.394613	0.503474	0.390651	0.242265	TRUE	0.342485
L1Md_T_dup21173:L1Md_T:L1:LINE	chr16:16507062-16513276	0.841218	1.35469	1.78244	1.73543	0.424775	1.33502	2.15519	2.7543	4.50751	2.74567	TRUE	0.343462
MMERVK10C-int_dup2860:MMERVK10C-int:ERVK:LTR	chr16:4343642-4351222	0.578338	0.213898	0	0	0	0.496753	0	0.355393	0.420701	0.64604	TRUE	0.343811
IAPLTR2_Mm_dup513:IAPLTR2_Mm:ERVK:LTR	chr6:143883424-143883900	0	0.499096	0	0	0.33982	0.372564	0	1.06618	0	0	TRUE	0.3439
L1_Mus3_dup39490:L1_Mus3:L1:LINE	chr14:11984648-11984936	0	0	0	0.208252	0	0.124188	0.333903	0.355393	0.330551	0.619122	TRUE	0.344913
B2_Mm1a_dup1011:B2_Mm1a:B2:SINE	chr1:191389488-191389646	0	0.427797	0.132033	0	0.594685	0.0620941	0.303549	0	0.420701	0.619122	TRUE	0.345318
L1Md_T_dup19942:L1Md_T:L1:LINE	chr14:93209030-93216479	17.1398	22.3167	22.9737	30.4742	19.1149	27.4145	33.4814	42.8841	72.3906	57.9013	TRUE	0.34532
L1Md_T_dup10170:L1Md_T:L1:LINE	chr8:9632257-9632713	0.315457	0	0.132033	0.347086	0	0.31047	0	0.414626	0.0901502	0.376857	TRUE	0.345649
L1Md_T_dup23291:L1Md_T:L1:LINE	chr18:90464138-90471202	1.1041	2.21028	2.17854	5.06746	1.6991	2.639	2.61052	3.99818	7.60267	3.28404	TRUE	0.345983
B2_Mm1a_dup7645:B2_Mm1a:B2:SINE	chr7:127720312-127720475	0.315457	0	0	0.347086	0	0.558847	0	0.740403	0.270451	0.565285	TRUE	0.347195
L1Md_T_dup8913:L1Md_T:L1:LINE	chr7:6075169-6081506	0	0	0	0	0	0.217329	0.667807	0.207313	1.23205	1.04982	TRUE	0.34785
L1Md_T_dup18630:L1Md_T:L1:LINE	chr13:66245333-66245956	0.0525761	0.712994	0.132033	0	0	0.217329	0	0.325777	0.15025	0.134592	TRUE	0.348056
L1Md_T_dup7741:L1Md_T:L1:LINE	chr6:21393957-21399849	0.578338	0.641695	0.990246	0	0	0.372564	1.12313	1.21426	1.1419	1.83045	TRUE	0.34891
MTA_Mm-int_dup499:MTA_Mm-int:ERVL-MaLR:LTR	chr2:176715055-176716151	0.578338	0	0.132033	0	0	0.869317	0	1.30311	0.721202	0.403775	TRUE	0.349398
L1Md_Gf_dup68:L1Md_Gf:L1:LINE	chr2:37109165-37109651	0.68349	0.570395	0.528131	2.36019	0.33982	2.48376	1.63916	3.79086	3.96661	3.74165	TRUE	0.349726
B2_Mm1a_dup9066:B2_Mm1a:B2:SINE	chr9:58259443-58259633	0.368033	0	0	0.208252	0.16991	0.186282	0.212484	0.177697	0.420701	0.511448	TRUE	0.350205
MT2_Mm_dup2596:MT2_Mm:ERVL:LTR	chr19:9907958-9908391	0	0	0	0.0694173	0.50973	0.155235	0.273194	0.740403	0.450751	0	TRUE	0.350444
L1Md_T_dup9752:L1Md_T:L1:LINE	chr7:90527016-90532866	0.68349	0.712994	0.990246	1.45776	0.424775	0.434659	2.15519	1.33273	4.05676	1.80353	TRUE	0.350682
L1Md_T_dup2020:L1Md_T:L1:LINE	chr2:17486326-17491483	0	0.499096	0.72618	0	0.084955	0.124188	0.546387	0.325777	1.29215	0.242265	TRUE	0.350957
B2_Mm1a_dup5619:B2_Mm1a:B2:SINE	chr5:137282114-137282271	0.157728	0.142599	0.198049	0.138835	0	0.217329	0.455323	1.03656	0.721202	0.107673	TRUE	0.35102
MTA_Mm_dup3092:MTA_Mm:ERVL-MaLR:LTR	chr3:96778445-96778809	0.157728	0.356497	0	0	0	0	0.364258	0.236929	0.1803	0.592203	TRUE	0.351189
L1Md_T_dup579:L1Md_T:L1:LINE	chr1:54026205-54031419	0.736066	0.0712994	0.924229	1.5966	0.33982	0.372564	1.33561	0.148081	2.85476	1.72277	TRUE	0.351579
MTA_Mm-int_dup2661:MTA_Mm-int:ERVL-MaLR:LTR	chr16:44151964-44153060	0	0	0	0	0.424775	0.496753	0	0.148081	0.390651	0.834468	TRUE	0.351753
ORR1A0-int_dup159:ORR1A0-int:ERVL-MaLR:LTR	chr6:54823311-54823946	1.20925	0.855593	1.18829	0.833008	0.764595	1.11769	1.30526	2.28044	2.07345	2.3419	TRUE	0.351825
MMSAT4_dup1127:MMSAT4:Satellite:Satellite	chr13:62171313-62173389	0.788642	0.784294	5.08326	3.6097	0	0.807223	0.546387	0.592322	1.5025	1.64202	TRUE	0.352059
B2_Mm1a_dup14534:B2_Mm1a:B2:SINE	chr14:42259456-42259607	0.105152	0.142599	0.198049	0.138835	0.16991	0.217329	0.121419	0.53309	0.240401	0.16151	TRUE	0.352099
MER33_dup1149:MER33:hAT-Charlie:DNA	chr8:20292494-20292685	0.262881	0.213898	0.990246	1.94368	0	0	0.0910646	0.0296161	0.0601001	0.16151	TRUE	0.352214
MER33_dup1150:MER33:hAT-Charlie:DNA	chr8:20419776-20419967	0.262881	0.213898	0.990246	1.94368	0	0	0.0910646	0.0296161	0.0601001	0.16151	TRUE	0.352214
B2_Mm1a_dup5906:B2_Mm1a:B2:SINE	chr6:35114032-35114192	1.57728	0.926892	1.12228	0.555338	1.52919	0.465706	1.03207	2.07313	1.3222	0.726795	TRUE	0.352761
L1Md_Gf_dup926:L1Md_Gf:L1:LINE	chr13:77569295-77575144	0.998947	0.641695	0	1.5966	0.33982	1.0556	1.21419	1.56965	3.03506	1.64202	TRUE	0.352766
RLTR25A_dup1052:RLTR25A:ERVK:LTR	chrX:144323741-144323817	0.157728	0	0.132033	0.485921	0.16991	0.155235	0.212484	0.414626	0.300501	0.296102	TRUE	0.352941
L1Md_T_dup18686:L1Md_T:L1:LINE	chr13:71879513-71884934	0	0.998192	0	0	0.16991	0.372564	0.182129	0	1.202	0.32302	TRUE	0.352999
MT2_Mm_dup228:MT2_Mm:ERVL:LTR	chr2:25804981-25805245	0.0525761	0	0.0660164	0	0.33982	0.434659	0.576742	0.473858	1.4424	0.861387	TRUE	0.353246
L1Md_T_dup7765:L1Md_T:L1:LINE	chr6:23364890-23370305	0	0	0.330082	0	0	0.5278	0	0.148081	0.601001	0.699877	TRUE	0.353333
L1_Mus1_dup4703:L1_Mus1:L1:LINE	chr3:103287791-103288044	0	0	0	0.347086	0	0.31047	0.212484	0.444242	0.21035	0.780632	TRUE	0.353402
MurSatRep1_dup1783:MurSatRep1:MurSatRep1:Unknown	chr12:23780669-23781272	0	0.427797	0	1.04126	0.254865	0.031047	0.121419	0.177697	0.240401	0	TRUE	0.353588
ERVB7_1-LTR_MM_dup10:ERVB7_1-LTR_MM:ERVK:LTR	chr1:11619354-11619672	0	1.92508	0.858213	1.45776	0	1.67654	0.485678	1.27349	2.01335	2.638	TRUE	0.353759
MTA_Mm-int_dup495:MTA_Mm-int:ERVL-MaLR:LTR	chr2:176620403-176621480	2.2082	1.14079	1.58439	4.23446	4.16279	0.651988	3.764	1.80658	2.40401	7.88707	TRUE	0.353814
RLTR10-int_dup2132:RLTR10-int:ERVK:LTR	chr14:86914600-86915594	0	0.0712994	0.462115	0.277669	0	0.124188	0.758871	0.977332	0.631051	0.80755	TRUE	0.354119
L1Md_T_dup11276:L1Md_T:L1:LINE	chr9:11108836-11115024	0.420609	0.0712994	0.0660164	0.347086	0.424775	0	0.546387	0	1.1419	0.349938	TRUE	0.354579
ERVB7_1-LTR_MM_dup700:ERVB7_1-LTR_MM:ERVK:LTR	chr17:32369422-32369738	7.62354	1.49729	2.50862	3.33203	0	0.807223	1.06242	0	2.07345	3.01485	TRUE	0.355321
IAPLTR2a2_Mm_dup571:IAPLTR2a2_Mm:ERVK:LTR	chr6:136801752-136801992	0.0525761	0.0712994	0	0	0	0.5278	0.242839	0.592322	0.721202	0.780632	TRUE	0.355667
RSINE1_dup84195:RSINE1:B4:SINE	chr12:20875777-20875901	0.105152	0.641695	0.0660164	0.555338	0.254865	0.589894	0.212484	0.9181	0.480801	0.753713	TRUE	0.358612
MMETn-int_dup46:MMETn-int:ERVK:LTR	chr1:171857955-171858741	0.68349	1.21209	0.924229	0	1.01946	1.08665	1.24455	2.33967	2.1636	1.74969	TRUE	0.358654
IAPEz-int_dup746:IAPEz-int:ERVK:LTR	chr2:84506815-84510082	2.94426	1.28339	0.858213	0	2.03892	1.42816	0	1.6585	0.841402	1.319	TRUE	0.359368
L1Md_T_dup18790:L1Md_T:L1:LINE	chr13:81585918-81591167	0	0.641695	0	0.0694173	0	0.372564	0	0	0.721202	0.269183	TRUE	0.360725
IAPEz-int_dup618:IAPEz-int:ERVK:LTR	chr2:26998636-27000000	2.52366	0.926892	0.264065	0	0	0.993505	0	0.681171	1.23205	0.726795	TRUE	0.360813
B2_Mm1t_dup18699:B2_Mm1t:B2:SINE	chr14:34472414-34472592	0	1.14079	0	0	0.50973	0	0.303549	0.325777	0.480801	0	TRUE	0.360823
L1Md_F2_dup52346:L1Md_F2:L1:LINE	chr14:24073807-24075734	0	0.356497	0.858213	0.277669	0	0.31047	0	0.266545	0.1803	0.376857	TRUE	0.361178
B2_Mm1t_dup9578:B2_Mm1t:B2:SINE	chr7:118220490-118220661	0	0.213898	0	0.0694173	0	0.124188	0.273194	0.414626	0.450751	0.188428	TRUE	0.361283
Lx3_Mus_dup9934:Lx3_Mus:L1:LINE	chr14:4191787-4191921	1.1041	1.71119	0.594147	1.18009	1.44423	1.49026	0.0607097	0.770019	1.83305	1.50743	TRUE	0.361421
MurSatRep1_dup2116:MurSatRep1:MurSatRep1:Unknown	chr13:66282113-66282198	0.578338	0.285198	0.330082	0.833008	0.33982	0.248376	0.121419	0.325777	0.330551	0.32302	TRUE	0.36159
L1Md_T_dup452:L1Md_T:L1:LINE	chr1:46583362-46588593	0	0	0	1.38835	0.67964	0.714082	0.667807	0.829251	2.0434	0.780632	TRUE	0.361996
B2_Mm1a_dup648:B2_Mm1a:B2:SINE	chr1:135353493-135353673	0.893795	0.142599	0.594147	0	1.27432	0.031047	0.849936	0.829251	0.931552	0.565285	TRUE	0.36229
L1Md_T_dup20286:L1Md_T:L1:LINE	chr15:103410636-103417544	2.4185	5.49006	3.03675	2.77669	1.44423	3.53936	5.82813	6.45631	10.5476	7.72556	TRUE	0.362326
L1Md_T_dup16940:L1Md_T:L1:LINE	chr11:47850397-47856075	0	0.712994	0.198049	0	0	0	0.0910646	0	0.240401	0	TRUE	0.362328
MTA_Mm_dup4341:MTA_Mm:ERVL-MaLR:LTR	chr4:147669123-147669517	1.52471	1.35469	2.24456	2.08252	2.71856	2.45272	1.91236	3.46509	3.72621	4.30693	TRUE	0.362832
MTA_Mm_dup7846:MTA_Mm:ERVL-MaLR:LTR	chr9:78556291-78556684	1.1041	0.142599	0.396098	0.277669	0.254865	0.714082	0	0.9181	0.1803	0.780632	TRUE	0.363073
L1Md_T_dup20500:L1Md_T:L1:LINE	chr15:23462374-23468612	0	0.570395	0.330082	0	0.16991	0.403612	0.394613	1.12541	0.240401	0.726795	TRUE	0.363938
RLTR17B_Mm_dup2358:RLTR17B_Mm:ERVK:LTR	chr2:10503800-10503896	0	0.0712994	0.132033	0.416504	0.254865	0.0620941	0.151774	0	0.21035	0.349938	TRUE	0.364097
L1Md_T_dup22792:L1Md_T:L1:LINE	chr18:22988996-22995482	0.788642	0.926892	0	2.0131	0.84955	0.714082	2.36768	1.33273	4.41736	2.31498	TRUE	0.36434
L1Md_T_dup3140:L1Md_T:L1:LINE	chr2:150412038-150417397	0.210305	0	0	0	0.424775	0	0.242839	0.473858	0	0.16151	TRUE	0.364395
ID4__dup21804:ID4_:ID:SINE	chr14:57728442-57728517	0.105152	0	0.132033	0.138835	0	0.186282	0.212484	0.296161	0.1803	0.565285	TRUE	0.364748
L1Md_T_dup9895:L1Md_T:L1:LINE	chr7:104096774-104101552	0.157728	0.285198	0.330082	0	0	0.31047	0	0	0.0300501	0.780632	TRUE	0.364862
L1Md_T_dup22420:L1Md_T:L1:LINE	chr17:69323423-69330344	0	0	0	0.624756	0	0.155235	0.242839	0	0.390651	0.64604	TRUE	0.365473
RLTR25B_dup3149:RLTR25B:ERVK:LTR	chr16:4900727-4900811	0	0.356497	0.0660164	0.138835	0.084955	0.217329	0	0.266545	0.0300501	0.269183	TRUE	0.365557
MT2_Mm_dup666:MT2_Mm:ERVL:LTR	chr4:118491046-118491537	0.630914	0.499096	0.660164	0.971842	0.594685	0.31047	0.546387	1.15503	1.0217	0.0538367	TRUE	0.365569
L1Md_F2_dup60947:L1Md_F2:L1:LINE	chr17:58213138-58218368	0.105152	0.784294	0	0	0	0	0.242839	0	0.631051	0	TRUE	0.365975
MERVL-int_dup1987:MERVL-int:ERVL:LTR	chr13:76077829-76083169	0	2.21028	2.31057	5.34513	1.61414	0.465706	1.79094	1.45119	2.25375	2.15347	TRUE	0.366204
L1Md_Gf_dup297:L1Md_Gf:L1:LINE	chr6:117738042-117739011	0.0525761	0.285198	0.132033	0	0	0.248376	0.576742	0.9181	0.631051	0.592203	TRUE	0.366282
ID_B1_dup7613:ID_B1:B4:SINE	chr2:10498590-10498677	0	0.0712994	0	0	0.934505	0	1.94271	1.92505	1.41235	1.69586	TRUE	0.366673
L1Md_F2_dup57824:L1Md_F2:L1:LINE	chr16:18521872-18522808	0	0	0	0	0	0.124188	0.485678	0.444242	0.300501	0.834468	TRUE	0.366798
MT2B2_dup1642:MT2B2:ERVL:LTR	chr8:20423506-20423596	2.68138	1.99638	2.04651	2.15194	1.52919	1.17979	1.33561	1.89543	2.61436	1.99196	TRUE	0.367217
MTA_Mm_dup4204:MTA_Mm:ERVL-MaLR:LTR	chr4:119546981-119547363	0.262881	0.213898	0.132033	0.416504	0.084955	0.0931411	0.364258	0.385009	0.1202	0.672958	TRUE	0.368026
B2_Mm1a_dup2092:B2_Mm1a:B2:SINE	chr2:154801712-154801871	0.788642	0.641695	0.594147	2.0131	1.6991	0.403612	0.121419	0	0.570951	0.780632	TRUE	0.368162
L1Md_T_dup22783:L1Md_T:L1:LINE	chr18:22439352-22444795	1.47213	0	0.264065	0	0	0.031047	0.516033	0	1.11185	0.296102	TRUE	0.368226
IAPEz-int_dup564:IAPEz-int:ERVK:LTR	chr2:7405728-7408994	0.788642	0.641695	0.462115	2.56844	0.424775	0.341517	0	0	0.420701	0.457612	TRUE	0.368388
L1_Mus2_dup7216:L1_Mus2:L1:LINE	chr6:123941706-123942838	0.105152	0.142599	0.462115	0.485921	0.084955	0.0620941	0.303549	0.236929	0.540901	0.16151	TRUE	0.36864
L1Md_T_dup1418:L1Md_T:L1:LINE	chr1:140108970-140109277	0.0525761	0.0712994	0.264065	0.833008	0	0.186282	0.121419	0.385009	0.270451	0.134592	TRUE	0.368769
MTA_Mm_dup14972:MTA_Mm:ERVL-MaLR:LTR	chr18:39192293-39192687	0.105152	0	0.330082	0	0.594685	0	0.303549	0.355393	0.1803	0.242265	TRUE	0.369196
B2_Mm1t_dup17352:B2_Mm1t:B2:SINE	chr12:111308545-111308729	0.368033	0	0.0660164	0.277669	0.33982	0	0.242839	0	0.0300501	0.592203	TRUE	0.369239
L1Md_A_dup2994:L1Md_A:L1:LINE	chr3:104194229-104200641	1.20925	0.712994	0.132033	0	0	0.683035	0	0.325777	0.751252	0.672958	TRUE	0.369269
L1Md_F2_dup59890:L1Md_F2:L1:LINE	chr16:98048364-98051914	0.736066	0.855593	0.660164	0	1.35928	0.372564	0	0	0.360601	0.592203	TRUE	0.369693
L1Md_T_dup4883:L1Md_T:L1:LINE	chr4:112981826-112987078	1.41956	1.85378	2.31057	2.70727	2.6336	2.39062	2.76229	2.96161	6.25041	3.957	TRUE	0.369855
MT-int:MT-int:ERVL-MaLR:LTR	chr1:20126626-20127357	0	0	0	0.138835	0	0	1.15348	0.681171	1.0217	1.23824	TRUE	0.370392
B2_Mm1t_dup18576:B2_Mm1t:B2:SINE	chr14:25981204-25981392	0.420609	0	0.264065	0.277669	0	0	0.607097	0.0296161	0.570951	0.942142	TRUE	0.371184
L1Md_T_dup20751:L1Md_T:L1:LINE	chr15:48513579-48518699	0.578338	0	0	0	0	0	0.546387	0	0.631051	0.753713	TRUE	0.371802
MurSatRep1_dup179:MurSatRep1:MurSatRep1:Unknown	chr2:175880975-175881119	0.736066	0.784294	0	0.277669	0.50973	0.279423	0.849936	0.562706	0.601001	1.69586	TRUE	0.372022
MMSAT4_dup278:MMSAT4:Satellite:Satellite	chr4:147754583-147755866	0.0525761	0.427797	0.132033	0.694173	0.084955	0.186282	0.394613	0	0.631051	0.834468	TRUE	0.372869
L1Md_F2_dup17743:L1Md_F2:L1:LINE	chr5:34856809-34857888	0.210305	0	0	0	0	0.155235	0.394613	0.385009	0.300501	0.699877	TRUE	0.373173
L1Md_T_dup8502:L1Md_T:L1:LINE	chr6:103725380-103726377	0	1.35469	0	0.76359	1.18937	0.745129	1.85165	1.24388	2.76461	2.53032	TRUE	0.373316
B2_Mm2_dup13286:B2_Mm2:B2:SINE	chr3:68995421-68995577	0.368033	0	0	0	0.33982	0	0.364258	0.621938	0.240401	0.0538367	TRUE	0.373582
B3A_dup22100:B3A:B2:SINE	chr4:132714253-132714393	0.262881	0.285198	0.528131	0.347086	0.254865	0.124188	0.0910646	0.177697	0.1202	0.242265	TRUE	0.374118
MurSatRep1_dup2098:MurSatRep1:MurSatRep1:Unknown	chr13:66121978-66122361	0.420609	0.356497	0.990246	0	0	0.0620941	0.151774	0	0.240401	0.296102	TRUE	0.374199
IAPEz-int_dup2376:IAPEz-int:ERVK:LTR	chr6:28927775-28928998	2.36593	1.63989	1.45236	0	0	4.53287	0	2.72468	3.51586	5.11448	TRUE	0.374528
B2_Mm1a_dup7687:B2_Mm1a:B2:SINE	chr7:130954607-130954766	0	0.142599	0	0	0	0	0.333903	0.562706	0.0300501	0.242265	TRUE	0.374926
RLTR4_Mm_dup79:RLTR4_Mm:ERV1:LTR	chr5:76930516-76931212	0.210305	0.712994	0.198049	0	0.084955	0.279423	0	0	0.240401	0.457612	TRUE	0.375183
ORR1B1-int_dup2251:ORR1B1-int:ERVL-MaLR:LTR	chr13:66394082-66395387	0.368033	0.356497	1.38634	2.98494	0	1.39712	0.880291	1.56965	2.0434	2.04579	TRUE	0.376433
ORR1C2_dup9160:ORR1C2:ERVL-MaLR:LTR	chr12:19408947-19409024	0.473185	0.427797	0.858213	0.902425	0.764595	0.279423	0.910646	0.473858	1.3222	1.15749	TRUE	0.376711
L1_Mus2_dup20909:L1_Mus2:L1:LINE	chr19:31722764-31729038	2.36593	0.926892	1.38634	1.52718	1.44423	2.01806	1.42668	0.770019	6.07011	1.69586	TRUE	0.377076
L1Md_F2_dup53370:L1Md_F2:L1:LINE	chr14:78887852-78892547	1.26183	0.998192	0.462115	0	0	0.341517	0.333903	0.236929	0.871452	0.565285	TRUE	0.377078
L1Md_Gf_dup344:L1Md_Gf:L1:LINE	chr7:61569861-61575121	0.473185	0.0712994	0.990246	0	0.84955	0.83827	1.39632	0.444242	3.66611	1.42667	TRUE	0.377087
L1Md_F3_dup1836:L1Md_F3:L1:LINE	chr2:131290311-131290676	0.420609	0.142599	0.0660164	0.138835	0.16991	0.248376	0.0607097	0.148081	0.240401	0.376857	TRUE	0.377251
MurSatRep1_dup241:MurSatRep1:MurSatRep1:Unknown	chr2:177012521-177012717	0	1.21209	2.77269	0	0	0.372564	0	0.621938	0.300501	0	TRUE	0.377271
MurSatRep1_dup188:MurSatRep1:MurSatRep1:Unknown	chr2:175978190-175978502	8.35961	8.69853	11.4868	12.7728	8.66541	3.50832	4.40145	5.74553	7.33222	6.4604	TRUE	0.377822
L1Md_Gf_dup986:L1Md_Gf:L1:LINE	chr15:62228445-62228748	0	0	0.462115	0	0	0	0.364258	0.710787	0	0.188428	TRUE	0.377965
MMSAT4_dup270:MMSAT4:Satellite:Satellite	chr4:147178604-147180143	3.83806	3.20847	5.47936	4.72038	3.3982	2.54586	2.2159	1.98428	4.62771	5.1414	TRUE	0.377997
L1Md_F2_dup49026:L1Md_F2:L1:LINE	chr12:99727104-99732698	0.525761	0.641695	0.330082	0	0	0.341517	0	0.236929	0.390651	0.215347	TRUE	0.378007
B2_Mm1a_dup17691:B2_Mm1a:B2:SINE	chr19:3771211-3771403	0.210305	0.0712994	0	0.624756	0	0.248376	0	0.207313	0.270451	0.134592	TRUE	0.378269
L1Md_T_dup11204:L1Md_T:L1:LINE	chr9:3743544-3748762	0	0.142599	0.0660164	0	0.424775	0	0.667807	0.177697	1.1419	0.32302	TRUE	0.378814
B2_Mm1a_dup10545:B2_Mm1a:B2:SINE	chr10:28290664-28290857	1.3144	0.142599	0.594147	0.694173	0.33982	0.931411	0	1.12541	0.330551	0.834468	TRUE	0.378874
L1Md_T_dup9022:L1Md_T:L1:LINE	chr7:14086328-14093460	1.1041	0.712994	1.65041	0.694173	0.424775	1.39712	1.5481	1.39196	4.29716	1.48051	TRUE	0.381259
L1Md_T_dup10803:L1Md_T:L1:LINE	chr8:65704113-65712009	2.36593	1.28339	0.660164	2.08252	0.764595	1.95596	3.39974	3.96856	5.34891	3.71473	TRUE	0.381356
L1Md_A_dup6809:L1Md_A:L1:LINE	chr8:15621113-15624208	0	0.499096	0	0.555338	0.50973	0.186282	0.576742	0	1.0217	0.834468	TRUE	0.381422
RLTR4_MM-int_dup281:RLTR4_MM-int:ERV1:LTR	chr10:50422801-50426892	1.99789	2.28158	1.25431	0	0	5.96103	10.4117	10.573	14.6644	14.5897	TRUE	0.381434
L1Md_T_dup19594:L1Md_T:L1:LINE	chr14:53929539-53936413	3.41745	3.35107	3.49887	6.45581	3.48315	4.47077	4.61394	4.29434	10.0668	7.72556	TRUE	0.381564
RLTR4_MM-int_dup78:RLTR4_MM-int:ERV1:LTR	chr2:156360884-156363103	2.31335	2.99458	2.50862	1.45776	1.86901	3.47727	3.36939	6.72286	6.04006	3.87624	TRUE	0.381654
MTA_Mm-int_dup1255:MTA_Mm-int:ERVL-MaLR:LTR	chr6:148663369-148664466	0	0	0	0	0	0	0.607097	0.444242	0.0601001	0.96906	TRUE	0.381975
L1_Mus3_dup10872:L1_Mus3:L1:LINE	chr4:74372762-74373329	0.210305	0.142599	0.264065	0.277669	0	0.5278	0.637452	0.9181	0.751252	1.15749	TRUE	0.382073
IAPEz-int_dup2228:IAPEz-int:ERVK:LTR	chr5:143005049-143005753	1.3144	0	0	0	0	0.124188	0	0	0.300501	0	TRUE	0.38268
L1Md_T_dup11359:L1Md_T:L1:LINE	chr9:18501679-18507981	0.315457	0	0.0660164	0.0694173	0	0	0.424968	0.325777	0.510851	0.188428	TRUE	0.383428
L1Md_T_dup16808:L1Md_T:L1:LINE	chr11:29961112-29966496	0.368033	0.641695	0.528131	0.347086	0.67964	0	0.667807	0.385009	0.390651	0.834468	TRUE	0.383527
L1Md_A_dup7272:L1Md_A:L1:LINE	chr8:82395675-82396979	0.210305	0.427797	0.528131	0.624756	0.254865	0.403612	0.121419	0.236929	0.570951	0.457612	TRUE	0.3836
RLTR1B-int_dup646:RLTR1B-int:ERV1:LTR	chr15:22700419-22703173	18.2965	17.6823	12.081	13.0505	18.1804	35.2384	55.3369	71.1971	74.2237	72.5988	TRUE	0.383921
MMETn-int_dup396:MMETn-int:ERVK:LTR	chr8:40567019-40571399	10.1998	9.34022	27.0007	30.2659	16.906	7.42024	5.49423	10.9283	10.788	9.36758	TRUE	0.383936
L1Md_F2_dup62954:L1Md_F2:L1:LINE	chr18:56751188-56751785	0.262881	0.712994	0.528131	0	0.424775	0.620941	0.242839	0.710787	0.390651	0.96906	TRUE	0.384909
L1Md_A_dup12226:L1Md_A:L1:LINE	chr11:16326460-16331707	0.788642	0	1.51838	1.04126	0.424775	1.0556	1.2749	1.39196	3.03506	1.15749	TRUE	0.384984
B2_Mm1a_dup13185:B2_Mm1a:B2:SINE	chr12:55617017-55617176	0.893795	0.499096	0.396098	0.347086	0	0.589894	0.819581	1.86582	0.450751	1.04982	TRUE	0.385763
Lx3_Mus_dup9953:Lx3_Mus:L1:LINE	chr14:5803523-5803657	1.1041	1.71119	1.98049	1.18009	1.44423	0	1.66952	1.36234	1.11185	1.50743	TRUE	0.386111
B4_dup49399:B4:B4:SINE	chr13:13600047-13600128	0.262881	0.142599	0	0.0694173	0.084955	0.651988	0.333903	0.503474	0.931552	0.915223	TRUE	0.386211
L1Md_T_dup263:L1Md_T:L1:LINE	chr1:25590834-25596260	0	0.285198	0.330082	0	0	0	0.546387	0.562706	0.1202	0.619122	TRUE	0.386302
L1Md_T_dup2778:L1Md_T:L1:LINE	chr2:105850795-105851782	0.368033	0.427797	0.462115	0.277669	0	0.372564	0.758871	0.592322	0.781302	1.319	TRUE	0.386615
B2_Mm1t_dup13549:B2_Mm1t:B2:SINE	chr10:8848527-8848685	1.47213	0	0	0.624756	0.50973	0	0.394613	0.681171	0.15025	0.107673	TRUE	0.386619
RMER10A_dup4057:RMER10A:ERVL:LTR	chr17:17066571-17066983	1.78759	0.356497	0.990246	0.833008	0	0	0.667807	0.503474	0.330551	0.753713	TRUE	0.386843
RLTR20B1_dup121:RLTR20B1:ERVK:LTR	chr2:175191090-175191609	0.841218	0.570395	0.396098	0.694173	1.10441	1.14874	0.424968	1.71773	1.05175	0.96906	TRUE	0.387034
B2_Mm1a_dup13360:B2_Mm1a:B2:SINE	chr12:80832934-80833093	1.05152	0.855593	0.264065	0.277669	0	0.683035	0.333903	1.30311	1.11185	0	TRUE	0.387123
L1Md_T_dup4689:L1Md_T:L1:LINE	chr3:134880938-134887427	1.3144	1.49729	1.38634	2.22135	1.78405	2.76319	3.49081	2.84315	6.70116	5.30291	TRUE	0.387193
L1Md_T_dup6852:L1Md_T:L1:LINE	chr5:56471506-56477372	0.893795	0.998192	0.264065	0.76359	0.67964	1.0556	1.73023	1.80658	2.70451	2.09963	TRUE	0.387298
L1Md_T_dup16894:L1Md_T:L1:LINE	chr11:41878060-41885133	0	1.42599	1.05626	1.11068	0	1.64549	1.39632	1.36234	3.21536	2.638	TRUE	0.38738
MuRRS-int_dup951:MuRRS-int:ERV1:LTR	chr16:56048537-56052640	0.315457	0.784294	0	1.31893	0.424775	0.589894	1.15348	1.03656	1.77295	1.319	TRUE	0.387786
L1Md_T_dup19303:L1Md_T:L1:LINE	chr14:16017017-16022231	1.36698	0.926892	0.990246	1.66602	0.424775	0.620941	1.21419	1.18464	2.37396	0.780632	TRUE	0.388146
MTA_Mm_dup11342:MTA_Mm:ERVL-MaLR:LTR	chr12:72272028-72272422	0.473185	0	0.198049	0.555338	0	0	0.303549	0.325777	0.390651	0	TRUE	0.388583
L1Md_Gf_dup1072:L1Md_Gf:L1:LINE	chr18:90471202-90472370	0.893795	1.42599	1.12228	1.18009	0.84955	1.67654	3.58187	3.64278	4.65776	4.06467	TRUE	0.389458
B2_Mm1a_dup11292:B2_Mm1a:B2:SINE	chr11:4587931-4588121	0.420609	0.213898	0.264065	0.624756	0.16991	0.186282	0.0607097	0.118464	0.300501	0.16151	TRUE	0.389592
L1Md_T_dup5096:L1Md_T:L1:LINE	chr4:20420636-20426310	0	0	0	0	0	0	0.455323	0.770019	0.270451	0.0269183	TRUE	0.390194
MIR_dup18051:MIR:MIR:SINE	chr8:20398965-20399088	5.15246	4.99096	7.39383	7.6359	4.41766	3.44622	2.03378	2.19159	4.59766	6.05663	TRUE	0.390204
L1Md_F3_dup2030:L1Md_F3:L1:LINE	chr3:59763928-59770781	54.6792	52.619	50.5685	52.4101	49.3589	30.8297	32.7225	52.2132	47.9299	48.6953	TRUE	0.390423
B2_Mm1t_dup15234:B2_Mm1t:B2:SINE	chr11:62703638-62703824	0	0	0.264065	0	0.50973	0	0.151774	0.355393	0	0	TRUE	0.390463
L1Md_T_dup10575:L1Md_T:L1:LINE	chr8:49981863-49987745	0	0.784294	0	0	0.67964	0.124188	0.607097	0.177697	0.510851	1.0229	TRUE	0.390592
RLTR10_dup304:RLTR10:ERVK:LTR	chr2:70270046-70270395	0	0	0.132033	0.208252	0	0.279423	0	0.53309	0.1202	0	TRUE	0.390829
B2_Mm1a_dup4360:B2_Mm1a:B2:SINE	chr4:145642976-145643164	0.315457	0.213898	0.594147	0.416504	0.50973	0.279423	0.273194	0.266545	0.510851	0.511448	TRUE	0.391414
MMSAT4_dup1230:MMSAT4:Satellite:Satellite	chr13:66123078-66123277	0.420609	0.427797	0.132033	0.902425	0.84955	0	0.485678	0.0888483	0.1202	0.915223	TRUE	0.3932
L1Md_T_dup9966:L1Md_T:L1:LINE	chr7:110356715-110357558	0	0.213898	0.264065	0	0.424775	0.5278	0.516033	1.27349	0.360601	0.780632	TRUE	0.393357
MMERVK10C-int_dup1634:MMERVK10C-int:ERVK:LTR	chr8:104460514-104463024	0.105152	0.356497	0.396098	1.73543	1.10441	1.08665	0	0.385009	1.29215	0.834468	TRUE	0.39356
IAPEz-int_dup4687:IAPEz-int:ERVK:LTR	chr10:99339405-99345881	2.68138	1.35469	3.76293	0	3.56811	0.745129	1.85165	2.22121	0.811352	2.96102	TRUE	0.393899
MTD_dup37297:MTD:ERVL-MaLR:LTR	chr12:20246114-20246191	0.315457	0.499096	1.32033	1.66602	0.934505	0.186282	0.0910646	0.236929	0.240401	0.16151	TRUE	0.394384
MMSAT4_dup275:MMSAT4:Satellite:Satellite	chr4:147583203-147584407	0.262881	0.285198	0.132033	0.416504	0	0.372564	0	0	0.480801	0.376857	TRUE	0.394525
ORR1A1-int_dup369:ORR1A1-int:ERVL-MaLR:LTR	chr8:34952184-34952711	0	0.0712994	0	0	0	0.620941	0.971355	1.39196	0.871452	1.39975	TRUE	0.394679
L1Md_F2_dup1697:L1Md_F2:L1:LINE	chr1:59954098-59955667	0.157728	0	0.264065	0	0.16991	0.031047	0.333903	0.207313	0.1202	0.511448	TRUE	0.394858
B2_Mm1t_dup18074:B2_Mm1t:B2:SINE	chr13:67351713-67351872	1.73501	0.712994	1.18829	0	2.12387	0.683035	0.698162	0.770019	1.05175	1.34592	TRUE	0.39542
L1VL1_dup1697:L1VL1:L1:LINE	chr17:55682452-55686379	0	0.641695	0.198049	0.624756	0.67964	0.5278	0.364258	0.385009	1.41235	0.242265	TRUE	0.396152
L1Md_T_dup908:L1Md_T:L1:LINE	chr1:97418809-97422473	0.736066	0.570395	0.396098	1.24951	1.10441	1.30398	1.69987	1.30311	4.05676	1.50743	TRUE	0.396179
RMER6B_dup366:RMER6B:ERVK:LTR	chr4:147166472-147166806	1.89274	1.56859	0	2.08252	0	0	6.2531	5.77514	2.94491	5.5721	TRUE	0.396237
B1_Mus1_dup43677:B1_Mus1:Alu:SINE	chr9:15315935-15316079	0	0.641695	0.462115	0.555338	0.67964	0.558847	0.819581	1.12541	1.0818	0.942142	TRUE	0.396328
B1_Mus1_dup43678:B1_Mus1:Alu:SINE	chr9:15316099-15316243	0	0.641695	0.462115	0.555338	0.67964	0.558847	0.819581	1.12541	1.0818	0.942142	TRUE	0.396328
B2_Mm1a_dup14186:B2_Mm1a:B2:SINE	chr13:97074355-97074547	0.368033	0.499096	0.396098	0	1.10441	0.434659	0.728517	1.00695	0.841402	0.80755	TRUE	0.396477
L1Md_T_dup5759:L1Md_T:L1:LINE	chr4:77136823-77137818	0.210305	0.356497	0.132033	0.347086	0	0.155235	0	0	0.300501	0.0538367	TRUE	0.396554
ORR1A0_dup652:ORR1A0:ERVL-MaLR:LTR	chr5:110262017-110262362	0.105152	0	0	0	0.594685	0.31047	0	0.444242	0.21035	0.0538367	TRUE	0.396637
L1Md_T_dup16643:L1Md_T:L1:LINE	chr11:11287225-11293500	0	0.926892	0	0.416504	0.084955	1.5213	0.576742	1.33273	1.83305	1.6151	TRUE	0.396959
L1Md_Gf_dup1060:L1Md_Gf:L1:LINE	chr18:43000001-43004030	8.51734	3.92147	7.2618	9.30192	6.7964	11.7979	9.74391	12.9422	23.7095	12.4094	TRUE	0.39709
L1Md_T_dup267:L1Md_T:L1:LINE	chr1:25668296-25669291	0	0.213898	0.132033	0.347086	0.33982	0	0.182129	0	0.360601	0.0538367	TRUE	0.397297
L1Md_A_dup9305:L1Md_A:L1:LINE	chrX:113472005-113477066	0	0.998192	0.198049	0	0	0.0931411	0.303549	0	0.901502	0	TRUE	0.397608
B2_Mm2_dup70393:B2_Mm2:B2:SINE	chr13:81625398-81625575	0.105152	0.641695	0.132033	0.0694173	0.254865	0	0.242839	0.0888483	0.300501	0.16151	TRUE	0.398045
L1Md_T_dup13008:L1Md_T:L1:LINE	chrX:72572854-72577988	1.26183	0	0.198049	0	0	0.372564	0	0	0.841402	0	TRUE	0.399105
Lx3_Mus_dup9977:Lx3_Mus:L1:LINE	chr14:7479364-7479498	0	0	0.660164	0.0694173	0	0.155235	0	0.266545	0.0300501	0.0538367	TRUE	0.39921
Lx3_Mus_dup9968:Lx3_Mus:L1:LINE	chr14:6880575-6880709	0.368033	0.427797	0	0.138835	0.254865	0	0.212484	0	0.21035	0.269183	TRUE	0.399276
Lx3_Mus_dup9971:Lx3_Mus:L1:LINE	chr14:7018163-7018297	0.368033	0.427797	0	0.138835	0.254865	0	0.212484	0	0.21035	0.269183	TRUE	0.399276
L1Md_Gf_dup801:L1Md_Gf:L1:LINE	chr10:32499150-32500000	0.210305	0.285198	0	0.208252	0	0.465706	0.182129	0.236929	0.901502	0.32302	TRUE	0.399372
B2_Mm1t_dup16203:B2_Mm1t:B2:SINE	chr11:106807373-106807563	0	0.0712994	0	0.277669	0	0.248376	1.21419	0.740403	1.803	0.753713	TRUE	0.399538
LTRIS_Mus_dup102:LTRIS_Mus:ERV1:LTR	chr3:8950935-8951521	0.0525761	0.712994	0.198049	0	0.16991	0.403612	0	0.651555	0.15025	0.107673	TRUE	0.399643
L1Md_T_dup8711:L1Md_T:L1:LINE	chr6:124211396-124217536	1.41956	2.49548	0.924229	0.555338	0.84955	2.39062	2.51945	4.02779	4.11686	2.90718	TRUE	0.39991
MTA_Mm-int_dup1418:MTA_Mm-int:ERVL-MaLR:LTR	chr8:15594458-15595554	0.157728	0.712994	1.65041	1.24951	0	2.73214	0	0.770019	2.2237	3.14945	TRUE	0.400162
L1Md_T_dup4420:L1Md_T:L1:LINE	chr3:110057289-110062986	0.210305	0.427797	0.198049	0	0	0.589894	0.789226	0.977332	1.23205	0.888305	TRUE	0.400413
L1Md_A_dup16217:L1Md_A:L1:LINE	chr18:25219006-25220001	0.105152	0.213898	0	0.555338	0.254865	0.248376	0	0.0888483	0.360601	0.107673	TRUE	0.400742
IAPEy-int_dup180:IAPEy-int:ERVK:LTR	chr7:26334070-26334696	0	0.356497	0	0	0	0.5278	0.182129	0.414626	0.450751	0.726795	TRUE	0.400778
MurSatRep1_dup1636:MurSatRep1:MurSatRep1:Unknown	chr12:20244276-20245047	0	0.142599	1.25431	1.31893	0.594685	0.186282	0	0.236929	0.1803	0	TRUE	0.401094
L1Md_T_dup18197:L1Md_T:L1:LINE	chr13:3110411-3115903	0	0.213898	0	0	0	0.217329	0.546387	0.355393	1.11185	0.242265	TRUE	0.40124
L1_Mm_dup1669:L1_Mm:L1:LINE	chr6:33534562-33537759	1.47213	2.28158	1.65041	0	1.35928	3.13575	0	1.54004	3.72621	1.74969	TRUE	0.401348
L1Md_T_dup21503:L1Md_T:L1:LINE	chr16:57586095-57593165	0.68349	2.13898	0.72618	2.84611	1.95396	1.70759	2.27661	2.54699	3.60601	2.74567	TRUE	0.401769
MurSatRep1_dup1954:MurSatRep1:MurSatRep1:Unknown	chr13:62487595-62487800	1.15668	1.14079	0.792196	1.04126	0.424775	1.92492	0	0	1.95325	2.3419	TRUE	0.402
L1Md_T_dup6359:L1Md_T:L1:LINE	chr5:8266602-8271799	3.04942	2.49548	1.32033	2.29077	0.594685	2.39062	5.37281	3.58355	9.55592	4.17234	TRUE	0.402154
RLTR45-int_dup1157:RLTR45-int:ERVK:LTR	chr14:7554731-7554867	0.893795	0.784294	1.18829	0.555338	0.16991	0.124188	0.971355	1.00695	0.0300501	1.39975	TRUE	0.402767
L1_Mus1_dup19402:L1_Mus1:L1:LINE	chr12:4349443-4354011	0.368033	0	0	0	0	0.434659	0	0.207313	0.300501	0.457612	TRUE	0.403105
B4A_dup52000:B4A:B4:SINE	chr8:112735377-112735557	0	0.0712994	0.0660164	0.208252	0	0.403612	0.212484	0.266545	0.480801	0.619122	TRUE	0.403448
L1Md_F2_dup61510:L1Md_F2:L1:LINE	chr17:88451843-88457050	1.41956	0.926892	0.660164	0.624756	0.764595	0.620941	0.849936	0.53309	1.89315	0.834468	TRUE	0.403568
B1_Mus2_dup66478:B1_Mus2:Alu:SINE	chr17:84301650-84301793	0	0	0.132033	0.208252	0	0.434659	0	0.325777	0.420701	0.215347	TRUE	0.404005
B2_Mm1a_dup16252:B2_Mm1a:B2:SINE	chr16:91492359-91492517	0.473185	0.0712994	0.858213	0.416504	0.16991	0.776176	0.485678	1.12541	0.721202	0.942142	TRUE	0.404308
B3A_dup41974:B3A:B2:SINE	chr8:19695502-19695519	0.473185	0.641695	0.462115	0.347086	0.50973	0.434659	0.182129	0.236929	0.721202	0.403775	TRUE	0.404524
MTA_Mm_dup3945:MTA_Mm:ERVL-MaLR:LTR	chr4:70372357-70372750	0.630914	0.712994	0.858213	0	0	0.714082	0.364258	1.03656	1.2621	0.080755	TRUE	0.404688
B2_Mm1a_dup3378:B2_Mm1a:B2:SINE	chr4:48347996-48348155	0.210305	0	0	0	0.254865	0.279423	0.182129	0.444242	0.300501	0.269183	TRUE	0.405759
7SK_dup54:7SK:RNA:RNA	chr2:7076173-7076405	0	6.91604	0	0	2.20883	1.5213	7.8012	3.08008	15.9866	1.37284	TRUE	0.406229
B2_Mm1t_dup5527:B2_Mm1t:B2:SINE	chr4:135907344-135907528	0	0.0712994	0	0.624756	0.33982	0.186282	0	0	0.300501	0.107673	TRUE	0.406376
IAPA_MM-int_dup124:IAPA_MM-int:ERVK:LTR	chr19:33373316-33373399	0.841218	0.427797	0.660164	0.347086	0.254865	0.869317	0.698162	1.54004	0.871452	1.0229	TRUE	0.406391
L1Md_T_dup1400:L1Md_T:L1:LINE	chr1:139613416-139616986	1.1041	1.42599	0.792196	2.42961	1.01946	1.27293	1.57845	1.42157	2.25375	2.55724	TRUE	0.406966
L1Md_A_dup13784:L1Md_A:L1:LINE	chr14:7084525-7084844	0.210305	0.499096	0.990246	1.45776	0.33982	0.931411	0.849936	1.71773	1.23205	0.942142	TRUE	0.407075
L1_Mus1_dup6806:L1_Mus1:L1:LINE	chr4:150322439-150323498	0	0.570395	0	0.76359	0	0.124188	1.09277	0.977332	0.631051	1.04982	TRUE	0.407134
RLTR14-int_dup1189:RLTR14-int:ERV1:LTR	chr14:4512625-4513240	0	0.784294	3.10277	2.91553	0	1.27293	2.76229	0	2.85476	5.94895	TRUE	0.407419
RLTR10_dup2622:RLTR10:ERVK:LTR	chr16:40760784-40760899	0	0	0.0660164	0	0	0.124188	0.394613	0.621938	0.240401	0.269183	TRUE	0.407494
MIR_dup18053:MIR:MIR:SINE	chr8:20422708-20422845	1.3144	0.570395	1.25431	0.833008	0.84955	0.589894	0.819581	1.12541	0.841402	1.10365	TRUE	0.407781
RLTR10_dup1356:RLTR10:ERVK:LTR	chr9:39960994-39961393	0.68349	0	0.396098	0	0	0.217329	0.333903	0.503474	0.21035	0.48453	TRUE	0.408279
L1Md_T_dup2677:L1Md_T:L1:LINE	chr2:97240135-97246558	0	0.285198	0	0.416504	0	0	0.698162	0	0.841402	0.672958	TRUE	0.408823
LTRIS2_dup1206:LTRIS2:ERV1:LTR	chr15:39246980-39247522	7.67612	16.2563	18.8807	18.1873	18.0954	5.68161	23.5857	17.4143	21.6961	24.3342	TRUE	0.408969
MERVL-int_dup426:MERVL-int:ERVL:LTR	chr3:62357517-62362875	0	0.855593	0.264065	0	0.16991	0.745129	0	0.296161	0.510851	0.80755	TRUE	0.409073
IAPEY3-int_dup2172:IAPEY3-int:ERVK:LTR	chr15:96580947-96581289	0.210305	0.142599	0.198049	0.0694173	0	0.496753	0.303549	0.53309	0.661101	0.538367	TRUE	0.40929
B2_Mm1t_dup2151:B2_Mm1t:B2:SINE	chr2:90964010-90964197	0.210305	0.570395	0.132033	0.138835	0	0.155235	0.0910646	0	0.450751	0.080755	TRUE	0.410064
L1_Mm_dup603:L1_Mm:L1:LINE	chr2:114927034-114927379	0.525761	0.0712994	0.132033	0.0694173	0.254865	0.31047	0.364258	0.355393	0.480801	0.619122	TRUE	0.410185
L1Md_Gf_dup475:L1Md_Gf:L1:LINE	chrX:98743485-98747434	0	0	0.264065	0.416504	0.424775	1.14874	0.728517	0.977332	1.77295	1.29208	TRUE	0.410584
RLTR14-int_dup1227:RLTR14-int:ERV1:LTR	chr14:5162597-5163007	0.630914	0.712994	0	0	0	0.372564	0	0.651555	0.15025	0	TRUE	0.41072
RLTR14-int_dup1246:RLTR14-int:ERV1:LTR	chr14:5515238-5515648	0.630914	0.712994	0	0	0	0.372564	0	0.651555	0.15025	0	TRUE	0.41072
B2_Mm1t_dup6982:B2_Mm1t:B2:SINE	chr5:123311729-123311920	0.0525761	0	0	0	0.424775	0	0.485678	0.829251	0	0.215347	TRUE	0.410868
L1Md_T_dup20932:L1Md_T:L1:LINE	chr15:66064320-66064893	0	0.142599	0.132033	0.138835	0.16991	0	0.394613	0.118464	0.540901	0.188428	TRUE	0.411137
ORR1A0_dup586:ORR1A0:ERVL-MaLR:LTR	chr5:28059939-28060283	0	0.142599	0.132033	0	0	0	0.455323	0.977332	0	0	TRUE	0.411358
L1_Mm_dup5175:L1_Mm:L1:LINE	chr17:90724200-90724467	0	0.499096	0.528131	0.555338	0.254865	0.496753	0.819581	0.858867	1.29215	0.672958	TRUE	0.411485
L1Md_T_dup15951:L1Md_T:L1:LINE	chr10:49823497-49829795	0.68349	0.213898	0.660164	1.45776	1.35928	1.95596	2.09449	2.42852	3.93656	2.31498	TRUE	0.41175
L1_Mus1_dup17730:L1_Mus1:L1:LINE	chr10:26106083-26110953	109.464	125.273	108.531	111.97	109.677	109.255	123.575	201.834	149.229	147.324	TRUE	0.412024
L1_Mm_dup1588:L1_Mm:L1:LINE	chr5:109768829-109769957	0.0525761	0	0.0660164	0.416504	0.50973	0.0620941	0.242839	0.177697	0.420701	0.0538367	TRUE	0.412208
L1Md_Gf_dup236:L1Md_Gf:L1:LINE	chr5:72542360-72543111	0.157728	0	0	0	0	0.31047	0.516033	0.9181	0.631051	0.215347	TRUE	0.412667
MMSAT4_dup188:MMSAT4:Satellite:Satellite	chr2:177264714-177265296	1.15668	0.855593	2.70667	0	0.33982	1.42816	0	1.00695	0.991652	1.04982	TRUE	0.412712
B3A_dup22957:B3A:B2:SINE	chr4:147670744-147670901	0.68349	1.35469	0.792196	0.694173	0.934505	0.589894	0.667807	0.710787	1.35225	0.619122	TRUE	0.412928
L2a_dup11087:L2a:L2:LINE	chr8:20396789-20396856	0.368033	0	0.264065	0.208252	0	0.155235	0.121419	0.207313	0.300501	0.080755	TRUE	0.413514
MMETn-int_dup251:MMETn-int:ERVK:LTR	chr6:115829383-115829470	0.262881	0.285198	0.990246	1.11068	0.84955	0.589894	0.424968	0.444242	0.691152	1.0229	TRUE	0.413601
MMSAT4_dup269:MMSAT4:Satellite:Satellite	chr4:147057637-147060090	30.6519	33.7959	33.9324	33.8756	19.9644	13.5986	12.8401	5.12359	28.8481	22.2345	TRUE	0.41369
RLTR45-int_dup1306:RLTR45-int:ERVK:LTR	chr19:13143670-13143809	0.157728	0.0712994	0.264065	0.138835	0.16991	0	0.212484	0.118464	0.0901502	0.242265	TRUE	0.414142
RLTR45-int_dup266:RLTR45-int:ERVK:LTR	chr4:8118620-8118759	0.157728	0.0712994	0.264065	0.138835	0.16991	0	0.212484	0.118464	0.0901502	0.242265	TRUE	0.414142
MMETn-int_dup751:MMETn-int:ERVK:LTR	chr13:74609369-74610014	26.4458	27.6642	33.9324	24.6431	42.6474	36.8839	47.2929	74.9288	57.3355	46.2726	TRUE	0.414253
L1Md_T_dup16:L1Md_T:L1:LINE	chr1:103413248-103419883	0	0.427797	0.198049	0	0.16991	0.248376	0.151774	0	0.390651	0.457612	TRUE	0.414381
B2_Mm1t_dup8445:B2_Mm1t:B2:SINE	chr6:149416526-149416712	0.210305	0.0712994	1.25431	0	0.50973	0.900364	0	0.473858	0.841402	0.592203	TRUE	0.414531
L1Md_T_dup17424:L1Md_T:L1:LINE	chr12:36486183-36492072	0.525761	0.356497	0.462115	0	0	0.589894	0.485678	0.355393	1.1419	0.780632	TRUE	0.414608
RLTR4_MM-int_dup212:RLTR4_MM-int:ERV1:LTR	chr8:90889349-90891184	0.157728	0.427797	0.330082	0.833008	0.764595	1.5834	0.941001	2.66545	1.35225	1.319	TRUE	0.415047
MER5A1_dup2730:MER5A1:hAT-Charlie:DNA	chr12:20998758-20998910	0.105152	0	0	0.416504	0.084955	0	0.182129	0.236929	0.1202	0.0269183	TRUE	0.415667
L1Md_T_dup5422:L1Md_T:L1:LINE	chr4:49460400-49467367	0.262881	0.712994	0.462115	1.11068	1.61414	1.55235	3.30868	2.13236	6.58096	1.53435	TRUE	0.415728
L1Md_F2_dup22042:L1Md_F2:L1:LINE	chr6:65838173-65839153	0.105152	0.285198	0.198049	0	0	0.155235	0.516033	0.503474	0.480801	0.430693	TRUE	0.415754
B3_dup119550:B3:B2:SINE	chr14:3569686-3569887	0.0525761	0.0712994	0	0.0694173	0	0	0.424968	0.562706	0.330551	0	TRUE	0.416442
MMSAT4_dup1110:MMSAT4:Satellite:Satellite	chr13:61743748-61745822	2.73396	2.21028	4.48911	7.77474	3.3982	1.27293	1.45703	0.799635	1.8631	3.06869	TRUE	0.41673
MT2C_Mm_dup730:MT2C_Mm:ERVL:LTR	chr7:3138620-3139071	0	0	0.264065	0.208252	0.084955	0	0.182129	0.355393	0	0.0269183	TRUE	0.416768
L1Md_F3_dup15768:L1Md_F3:L1:LINE	chr18:82503028-82503573	0	0.356497	0	0.208252	0.084955	0	0.212484	0.325777	0.1202	0	TRUE	0.416797
L1Md_T_dup15793:L1Md_T:L1:LINE	chr10:32816687-32823646	0	3.70757	0	0	0	0.869317	4.34074	3.52432	5.64941	1.74969	TRUE	0.41706
ORR1A1_dup4079:ORR1A1:ERVL-MaLR:LTR	chr17:16670181-16670305	0.315457	0	0.132033	0.277669	0.424775	0.5278	0	0.53309	0.330551	0.242265	TRUE	0.41721
L1Md_T_dup10901:L1Md_T:L1:LINE	chr8:76411861-76412508	0.630914	1.21209	0.858213	0.76359	1.44423	1.33502	1.79094	1.68812	3.21536	1.64202	TRUE	0.417372
B2_Mm1a_dup16424:B2_Mm1a:B2:SINE	chr17:23006387-23006559	0.841218	0.356497	0.792196	0.902425	0.67964	0.558847	0.698162	1.27349	0.841402	0.511448	TRUE	0.417902
L1Md_Gf_dup978:L1Md_Gf:L1:LINE	chr15:33560227-33561091	0	0.0712994	0	0	0.16991	0.496753	0.394613	0.53309	0.871452	0.457612	TRUE	0.417932
B2_Mm1t_dup17627:B2_Mm1t:B2:SINE	chr13:37381132-37381290	0	0	0	0	0	0.31047	0.182129	0.740403	0.1803	0.107673	TRUE	0.418101
B2_Mm1t_dup14848:B2_Mm1t:B2:SINE	chr11:24105895-24106085	0.788642	1.71119	1.05626	0.833008	1.18937	1.0556	0.424968	1.45119	1.2621	0.376857	TRUE	0.418161
L1Md_T_dup10195:L1Md_T:L1:LINE	chr8:16361143-16366137	0.473185	0.784294	0.198049	0	0	0.434659	0.637452	0.444242	0.931552	0.861387	TRUE	0.418211
L1Md_F2_dup56194:L1Md_F2:L1:LINE	chr15:36130229-36136442	0.578338	0	0	0.624756	0	0.341517	0	0.710787	0	0	TRUE	0.418847
MMSAT4_dup97:MMSAT4:Satellite:Satellite	chr2:175168726-175170375	2.36593	3.13717	2.57464	4.92863	2.97342	1.33502	0.819581	0.829251	1.47245	2.18039	TRUE	0.418967
ORR1B1-int_dup2222:ORR1B1-int:ERVL-MaLR:LTR	chr13:65542199-65544407	0	0.926892	0.990246	0.347086	1.44423	1.49026	0	0	1.83305	1.26516	TRUE	0.419114
L1Md_T_dup12158:L1Md_T:L1:LINE	chrX:9965945-9971416	0.578338	0.712994	0	0	0	0.589894	0.698162	0.681171	1.3222	0.672958	TRUE	0.419251
MMSAT4_dup1034:MMSAT4:Satellite:Satellite	chr12:22726447-22726588	0.578338	0.570395	0.660164	1.31893	0.33982	0.341517	0	0	0.330551	0.376857	TRUE	0.420007
L1M5_dup1102:L1M5:L1:LINE	chr1:181377053-181377257	0.0525761	0	0	0	0.084955	0.434659	0.121419	0.325777	0.420701	0.403775	TRUE	0.420343
L1_Mus2_dup8532:L1_Mus2:L1:LINE	chr8:20139231-20139508	0.578338	0.712994	0.660164	0	0.67964	0.589894	0.516033	0.977332	0.691152	0.619122	TRUE	0.420345
L1_Mus2_dup8537:L1_Mus2:L1:LINE	chr8:20280257-20280534	0.578338	0.712994	0.660164	1.31893	0.67964	0.589894	0.516033	0.977332	0.691152	0.619122	TRUE	0.420345
L1_Mus2_dup8544:L1_Mus2:L1:LINE	chr8:20407507-20407784	0.578338	0.712994	0.660164	1.31893	0.67964	0.589894	0.516033	0.977332	0.691152	0.619122	TRUE	0.420345
RMER16-int_dup1968:RMER16-int:ERVK:LTR	chr13:66370661-66370883	0.525761	0.285198	0.396098	0	0	0.403612	0.273194	0.592322	0	0.80755	TRUE	0.420362
B1_Mus1_dup74136:B1_Mus1:Alu:SINE	chr13:66126792-66126917	0	0.142599	0	0.0694173	0.254865	0.5278	0.364258	0.53309	0.871452	0.430693	TRUE	0.421668
B2_Mm1t_dup10455:B2_Mm1t:B2:SINE	chr8:84883973-84884164	0	0.142599	0	0	0	0	0.849936	0.444242	0.631051	0.672958	TRUE	0.421713
L1Md_Gf_dup161:L1Md_Gf:L1:LINE	chr4:16186316-16188804	0.368033	0	0.132033	0.694173	0	0.403612	0.455323	0.266545	0.961602	0.538367	TRUE	0.421747
L1Md_T_dup9432:L1Md_T:L1:LINE	chr7:57367191-57374716	0.0525761	0	0	0	0.594685	0	1.66952	1.62889	0.781302	1.0229	TRUE	0.421783
MMSAT4_dup126:MMSAT4:Satellite:Satellite	chr2:175977604-175977909	0.157728	4.49186	9.77042	6.17814	10.3645	0.651988	3.73365	3.317	2.67446	3.01485	TRUE	0.422108
MTA_Mm_dup6520:MTA_Mm:ERVL-MaLR:LTR	chr7:81149035-81149429	1.1041	0	1.05626	1.38835	0	0.931411	0	0.829251	1.0818	0	TRUE	0.422323
L1Md_T_dup23595:L1Md_T:L1:LINE	chr19:51949137-51955753	0	0.641695	0.330082	1.24951	0	0.279423	1.5481	0	2.88481	0.861387	TRUE	0.42255
L1Md_T_dup18727:L1Md_T:L1:LINE	chr13:77428884-77434230	0	0.356497	0.330082	0.971842	0	0.155235	0.394613	0.325777	0.450751	0.349938	TRUE	0.422692
L1Md_T_dup8662:L1Md_T:L1:LINE	chr6:120326320-120327007	0.157728	0.712994	0.198049	0.485921	0	0.279423	0.698162	0.770019	0.691152	0.538367	TRUE	0.423085
IAPLTR1_Mm_dup975:IAPLTR1_Mm:ERVK:LTR	chr10:99339039-99339404	1.26183	0.855593	1.05626	0.347086	0	0	1.42668	0.858867	0.601001	1.45359	TRUE	0.423474
B2_Mm1a_dup4228:B2_Mm1a:B2:SINE	chr4:138297253-138297420	0.525761	0.213898	0.660164	1.11068	0.16991	0.186282	0.182129	0	0.751252	0	TRUE	0.423829
L1Md_T_dup12821:L1Md_T:L1:LINE	chrX:61259208-61266477	0	0.0712994	0.330082	0.416504	0	0.217329	0.546387	0.266545	0.751252	0.538367	TRUE	0.424014
RLTR4_MM-int_dup222:RLTR4_MM-int:ERV1:LTR	chr9:62439748-62447317	0.157728	1.49729	1.91447	4.16504	2.20883	3.32203	4.82642	9.95101	5.19866	1.45359	TRUE	0.424017
IAPEz-int_dup292:IAPEz-int:ERVK:LTR	chr1:84999316-85000000	0	0	0	0	0.084955	0.31047	0.273194	0.473858	0.661101	0.0538367	TRUE	0.424114
RLTR25B_dup1803:RLTR25B:ERVK:LTR	chr9:15315788-15315873	0.525761	1.56859	1.32033	1.80485	1.10441	0.31047	0.971355	0.473858	1.35225	0.780632	TRUE	0.424494
MTA_Mm_dup15275:MTA_Mm:ERVL-MaLR:LTR	chr19:15958014-15958410	0.473185	0	0.132033	0	0	0.5278	0.941001	1.24388	1.17195	0.565285	TRUE	0.424974
ORR1A0-int_dup78:ORR1A0-int:ERVL-MaLR:LTR	chr3:80090806-80091314	0.0525761	0.213898	0.792196	0.277669	0.084955	0.434659	0.394613	0.296161	0.0901502	1.29208	TRUE	0.425661
L1Md_F2_dup27220:L1Md_F2:L1:LINE	chr7:118201603-118201865	0.0525761	0.285198	0.264065	0.138835	0.254865	0.0931411	0	0	0	0.188428	TRUE	0.425768
L1_Mus1_dup6839:L1_Mus1:L1:LINE	chr5:4818067-4818535	0	0.142599	0	0	0	0.186282	0.546387	0.888483	0.480801	0.107673	TRUE	0.426638
MTB_dup863:MTB:ERVL-MaLR:LTR	chr2:177908107-177908248	0.157728	0.356497	0.396098	0.902425	0.16991	0.496753	0.242839	0.236929	0.390651	0.861387	TRUE	0.426958
L1Md_T_dup18729:L1Md_T:L1:LINE	chr13:77537830-77543488	0	0	1.05626	0	0	0.217329	0	0.0296161	0.0300501	0.376857	TRUE	0.427524
B2_Mm1t_dup2760:B2_Mm1t:B2:SINE	chr2:153359228-153359419	0.0525761	0	0	0	0	0.248376	0.242839	0.592322	0.15025	0.242265	TRUE	0.427972
L1Md_A_dup7219:L1Md_A:L1:LINE	chr8:69555254-69560244	0.473185	0.570395	0.264065	0.76359	0	0.869317	1.12313	0.770019	2.52421	0.699877	TRUE	0.428006
L1Md_T_dup11709:L1Md_T:L1:LINE	chr9:79469796-79470788	0	0.213898	0	0	0	0	0.728517	0.355393	0.781302	0.32302	TRUE	0.428121
RLTR10_dup2283:RLTR10:ERVK:LTR	chr13:83137109-83137263	0	0.142599	0.0660164	0.0694173	0.084955	0.931411	0.819581	1.54004	1.05175	0.915223	TRUE	0.42822
L1Md_T_dup19146:L1Md_T:L1:LINE	chr14:3287700-3290912	0	0.998192	0.396098	1.11068	0	1.11769	0	0.177697	1.6828	0.376857	TRUE	0.428356
MurSatRep1_dup157:MurSatRep1:MurSatRep1:Unknown	chr2:175326077-175327665	0	0.499096	1.65041	4.44271	0	0.341517	0.576742	0	0.570951	1.26516	TRUE	0.428626
L1Md_T_dup16371:L1Md_T:L1:LINE	chr10:101956623-101960057	0.525761	0.427797	0.792196	0.277669	0.16991	0.124188	1.09277	0.740403	1.2621	0.430693	TRUE	0.428645
RLTR1B-int_dup656:RLTR1B-int:ERV1:LTR	chr15:39242709-39243124	0.998947	6.77345	4.8192	5.34513	8.66541	4.09821	8.89397	14.1269	10.2771	1.53435	TRUE	0.429006
L1_Mus3_dup6105:L1_Mus3:L1:LINE	chr2:176689090-176690551	3.62775	2.63808	1.38634	3.26261	2.29378	1.17979	1.60881	0.0296161	3.00501	2.53032	TRUE	0.42911
B2_Mm1a_dup4376:B2_Mm1a:B2:SINE	chr4:146581116-146581273	0	0.499096	0	0	0.50973	0.124188	0.424968	0.414626	0.300501	0.376857	TRUE	0.429987
MT2B1_dup4985:MT2B1:ERVL:LTR	chr12:22613938-22614353	0	0.213898	0	0.694173	0	0.0931411	0.0910646	0.177697	0	0.188428	TRUE	0.430097
MMSAT4_dup1263:MMSAT4:Satellite:Satellite	chr13:66527971-66528102	0.893795	0.356497	1.32033	2.29077	0.594685	0.776176	0.424968	0.53309	0.961602	0.888305	TRUE	0.430547
IMPB_01_dup8666:IMPB_01:Satellite:Satellite	chr6:57583059-57583159	0.157728	0.142599	0.0660164	0.138835	0	0.403612	0.242839	0.414626	0.570951	0.296102	TRUE	0.430708
MurSatRep1_dup376:MurSatRep1:MurSatRep1:Unknown	chr4:146893735-146893847	1.94532	3.63627	2.77269	2.56844	3.56811	1.67654	1.5481	2.28044	2.25375	1.85737	TRUE	0.430774
RLTR1B-int_dup708:RLTR1B-int:ERV1:LTR	chr17:15022968-15023580	0	0	0.132033	0	0.934505	0.496753	0.971355	1.03656	0.15025	1.72277	TRUE	0.430804
B2_Mm1a_dup15718:B2_Mm1a:B2:SINE	chr16:4948723-4948881	0.841218	0.213898	0.132033	0	0	0.403612	0.121419	0.829251	0.21035	0	TRUE	0.431025
L1Md_T_dup10223:L1Md_T:L1:LINE	chr8:19173930-19180991	0.736066	0.0712994	0.330082	0	0	0.465706	1.15348	0.947716	1.2621	0.995979	TRUE	0.43105
L1Md_Gf_dup493:L1Md_Gf:L1:LINE	chrX:120474932-120475585	0.315457	0	0.198049	0.138835	0	0.186282	0.151774	0.236929	0.270451	0.16151	TRUE	0.431204
L1Md_A_dup7777:L1Md_A:L1:LINE	chr9:78568539-78569908	0.315457	0.712994	0	0.485921	0.33982	0.745129	2.06413	2.0139	1.6828	1.85737	TRUE	0.431399
RMER1C_dup5954:RMER1C:RMER1C:Other	chr17:25042615-25042691	0.525761	0.0712994	0.528131	0.0694173	0.33982	0.496753	0.758871	0.829251	0.871452	0.780632	TRUE	0.431509
MurSatRep1_dup219:MurSatRep1:MurSatRep1:Unknown	chr2:176682352-176682607	0.473185	0.427797	2.17854	3.81795	0.594685	0.589894	0.303549	0.118464	0.540901	1.10365	TRUE	0.431868
L1Md_T_dup348:L1Md_T:L1:LINE	chr1:30854549-30858932	0.368033	0.784294	0	0	0	0	0.789226	0.621938	0.931552	0	TRUE	0.43248
L1Md_Gf_dup1000:L1Md_Gf:L1:LINE	chr16:21938847-21939724	0	0.213898	0.660164	0	0.254865	0	0.242839	0.325777	0.15025	0	TRUE	0.433493
B2_Mm1a_dup256:B2_Mm1a:B2:SINE	chr1:59793467-59793649	0.315457	0	0	0.416504	0.33982	0.279423	0	0.325777	0.0601001	0.16151	TRUE	0.433653
B2_Mm1a_dup9246:B2_Mm1a:B2:SINE	chr9:70554721-70554888	0.578338	0.356497	0.990246	1.45776	1.10441	1.21083	1.06242	1.71773	1.41235	1.319	TRUE	0.433884
B3_dup36092:B3:B2:SINE	chr4:147689435-147689645	0.525761	1.35469	0.594147	0.416504	0	0.372564	1.12313	1.42157	1.5025	0	TRUE	0.434154
L1Md_T_dup23476:L1Md_T:L1:LINE	chr19:33643084-33648255	0.525761	0.570395	0.330082	0	0.50973	0.434659	1.24455	0.740403	1.1419	1.39975	TRUE	0.434213
MTA_Mm-int_dup1461:MTA_Mm-int:ERVL-MaLR:LTR	chr8:60260965-60262060	0	0	0	0	0	0.31047	0.789226	0.562706	1.53255	0.0538367	TRUE	0.434246
L1Md_T_dup10889:L1Md_T:L1:LINE	chr8:75581543-75588185	0	0.427797	0	0.208252	0.16991	0	0.880291	0.325777	1.3823	0	TRUE	0.436001
L1Md_T_dup20475:L1Md_T:L1:LINE	chr15:21423169-21424449	0	0.427797	0.264065	0.138835	0	0.651988	0.485678	0.592322	0.751252	0.861387	TRUE	0.436282
L1Md_T_dup10086:L1Md_T:L1:LINE	chr7:140614235-140619820	0	0.213898	0.264065	0	0	0.745129	1.00171	0.770019	1.803	0.80755	TRUE	0.436649
B2_Mm1a_dup3492:B2_Mm1a:B2:SINE	chr4:83304106-83304297	1.62986	0.712994	2.77269	2.56844	2.80351	1.39712	2.12484	2.07313	2.70451	2.01888	TRUE	0.437349
L1Md_A_dup8890:L1Md_A:L1:LINE	chrX:76593214-76597552	0.315457	0.213898	0	0	0	0.31047	0.121419	0.236929	0.0300501	0.565285	TRUE	0.437697
L1Md_A_dup14422:L1Md_A:L1:LINE	chr14:116402655-116406469	0.420609	0.427797	0	0	0	0.558847	0.667807	0.118464	1.3823	0.861387	TRUE	0.437868
B2_Mm2_dup42073:B2_Mm2:B2:SINE	chr8:122903554-122903724	0.262881	0.356497	0.198049	0.277669	0.16991	0.0620941	0	0.0592322	0.0601001	0	TRUE	0.438366
L1Md_T_dup18909:L1Md_T:L1:LINE	chr13:89215694-89220922	0	0.712994	0	0.347086	0.424775	0.341517	0	0.266545	0.1202	0.269183	TRUE	0.438516
L1Md_A_dup384:L1Md_A:L1:LINE	chr1:46549339-46553867	0.210305	0	0	0.208252	0.084955	0.5278	0.576742	0.562706	1.2621	0.296102	TRUE	0.438574
L1Md_F2_dup47023:L1Md_F2:L1:LINE	chr12:22985201-22988041	4.15352	5.06226	4.29106	0	2.88847	3.38413	2.4891	1.56965	4.92821	4.76455	TRUE	0.438906
RMER15_dup4667:RMER15:ERVL:LTR	chr4:147673433-147673541	0.525761	0.712994	1.65041	2.49902	1.6991	0.248376	0.303549	0.148081	0.450751	0.457612	TRUE	0.439354
B2_Mm1a_dup1228:B2_Mm1a:B2:SINE	chr2:29156119-29156301	0.473185	0.0712994	0.264065	0	0	0.155235	0	0.236929	0.0601001	0	TRUE	0.439443
MurSatRep1_dup206:MurSatRep1:MurSatRep1:Unknown	chr2:176431765-176433344	2.05047	0	0.198049	0	0.84955	0.186282	0	0	0.0601001	0.296102	TRUE	0.439604
B2_Mm1a_dup1982:B2_Mm1a:B2:SINE	chr2:141177338-141177496	0.420609	0	0	0.416504	0	0.0931411	0.394613	0.266545	0.450751	0.215347	TRUE	0.43961
MTA_Mm_dup4203:MTA_Mm:ERVL-MaLR:LTR	chr4:119543076-119543470	0.210305	0.427797	0.0660164	0.138835	0	0.403612	0.303549	0.266545	0.601001	0.48453	TRUE	0.439627
MMSAT4_dup261:MMSAT4:Satellite:Satellite	chr4:146124532-146126072	51.6298	56.1839	117.509	166.671	46.2155	67.4963	27.9265	19.132	61.3923	101.536	TRUE	0.440149
B2_Mm1t_dup21932:B2_Mm1t:B2:SINE	chr18:10356189-10356344	0.157728	0	0	0	0.424775	0.186282	0	0.355393	0	0	TRUE	0.440164
B2_Mm1t_dup16645:B2_Mm1t:B2:SINE	chr12:31767638-31767823	0	0	0.198049	0	0.33982	0	0.698162	0.562706	0.390651	0.376857	TRUE	0.440489
MTA_Mm_dup11687:MTA_Mm:ERVL-MaLR:LTR	chr13:17322793-17323187	0.262881	0.499096	0	0	0	0.341517	0	0.296161	0.0300501	0.32302	TRUE	0.441044
L1Md_T_dup5367:L1Md_T:L1:LINE	chr4:38750226-38755456	0.525761	0	0.396098	0	0	0.372564	0	0	0.330551	0.376857	TRUE	0.441338
L1Md_A_dup1742:L1Md_A:L1:LINE	chr2:92281991-92282392	0.0525761	0	0.132033	0.485921	0.084955	0	0.364258	0.0592322	0.631051	0	TRUE	0.441821
ERVB4_1C-LTR_Mm_dup445:ERVB4_1C-LTR_Mm:ERVK:LTR	chr8:128747108-128747229	0.157728	0.285198	0.396098	0.347086	0.254865	0.217329	0.121419	0.0296161	0.450751	0.16151	TRUE	0.441846
MTB_dup864:MTB:ERVL-MaLR:LTR	chr2:177909668-177909775	0.315457	0.142599	0.0660164	0.0694173	0	0.31047	0.0607097	0.296161	0.270451	0.134592	TRUE	0.442593
L1Md_T_dup8085:L1Md_T:L1:LINE	chr6:60313026-60318729	0	1.49729	0.462115	1.87427	1.10441	0.745129	1.21419	0	2.43406	1.26516	TRUE	0.442738
MTA_Mm_dup4312:MTA_Mm:ERVL-MaLR:LTR	chr4:145684620-145685013	7.20293	4.84836	5.34733	6.38639	5.26721	6.61302	9.16717	7.1671	10.6678	11.9517	TRUE	0.442792
RLTR6B_Mm_dup54:RLTR6B_Mm:ERV1:LTR	chr2:177903127-177903678	0.0525761	0.213898	0.858213	0.76359	0	0.900364	0.789226	1.12541	1.41235	0.64604	TRUE	0.443215
ERVL-int_dup75:ERVL-int:ERVL:LTR	chr2:157166199-157166292	0.210305	0.0712994	0	0	0	0.155235	0.364258	0.53309	0.1202	0.32302	TRUE	0.443872
L1Md_Gf_dup1043:L1Md_Gf:L1:LINE	chr17:69323179-69323429	0.210305	0.213898	0.0660164	1.18009	0.33982	0.776176	0.455323	0.651555	0.931552	0.726795	TRUE	0.444354
L1Md_T_dup10727:L1Md_T:L1:LINE	chr8:60451759-60452148	0.473185	0.641695	0.330082	0.208252	0.424775	0.558847	0.303549	0.296161	1.05175	0.269183	TRUE	0.444428
ETnERV-int_dup742:ETnERV-int:ERVK:LTR	chr14:73188038-73194420	11.2513	10.481	16.24	15.8966	15.8866	6.20941	12.1723	11.4318	9.85642	13.1631	TRUE	0.444548
B2_Mm1a_dup15972:B2_Mm1a:B2:SINE	chr16:23334816-23334974	0.841218	0.356497	0.594147	0	0.50973	0.869317	0.607097	1.03656	1.0818	0.64604	TRUE	0.44479
RLTR14-int_dup1315:RLTR14-int:ERV1:LTR	chr14:6742748-6742883	0	0.285198	1.25431	0.138835	0	0.714082	0.212484	0.148081	0.240401	1.34592	TRUE	0.444859
B2_Mm1a_dup6990:B2_Mm1a:B2:SINE	chr7:34700802-34700960	0.788642	0.0712994	0.72618	0.694173	0.50973	0.403612	0	0	0	0.753713	TRUE	0.445444
L1Md_Gf_dup817:L1Md_Gf:L1:LINE	chr10:74343030-74343894	0	0.142599	0.132033	0	0.254865	0.900364	0	0.0592322	0.841402	0.780632	TRUE	0.445458
MurSatRep1_dup2100:MurSatRep1:MurSatRep1:Unknown	chr13:66128319-66128471	0	0.285198	0.528131	0.277669	0.50973	0	0.303549	0.296161	0.270451	0	TRUE	0.44555
L1Md_T_dup12011:L1Md_T:L1:LINE	chrX:73268096-73275199	0	0.641695	0	0	0	0.465706	1.18384	0.148081	2.52421	0.403775	TRUE	0.445793
RLTR45-int_dup1268:RLTR45-int:ERVK:LTR	chr18:3473547-3475428	0	0	0.396098	0.902425	0.254865	0	0.242839	0.236929	0	0.215347	TRUE	0.446103
L1Md_T_dup2005:L1Md_T:L1:LINE	chr2:16375216-16382307	0	0.213898	0	0.624756	0	0.341517	0.637452	0.681171	0.871452	0.269183	TRUE	0.446303
L1Md_F2_dup49153:L1Md_F2:L1:LINE	chr12:108144473-108144723	0.420609	0	0.198049	0	0.084955	0.186282	0.485678	0.444242	0.480801	0.32302	TRUE	0.446781
L1Md_T_dup2044:L1Md_T:L1:LINE	chr2:21486904-21493308	0.788642	0.213898	0	1.5966	0	0.683035	0.212484	0.651555	0.661101	0.349938	TRUE	0.446885
MurSatRep1_dup266:MurSatRep1:MurSatRep1:Unknown	chr2:177265297-177265492	0	0	1.05626	0	0.254865	0.186282	0.0910646	0.0296161	0	0.48453	TRUE	0.447254
RMER17D2_dup359:RMER17D2:ERVK:LTR	chr4:146203951-146204744	0	0	0.132033	0	0	0.372564	0.121419	0.592322	0	0.32302	TRUE	0.447363
L1Md_T_dup203:L1Md_T:L1:LINE	chr1:20277948-20284795	1.05152	0.570395	0.528131	0	0	1.14874	1.94271	1.03656	3.66611	1.0229	TRUE	0.447485
Tigger1_dup298:Tigger1:TcMar-Tigger:DNA	chr4:147680082-147680379	1.62986	2.21028	3.43285	4.37329	2.29378	0.993505	0.576742	0.503474	0.601001	1.80353	TRUE	0.447502
L1Md_Gf_dup374:L1Md_Gf:L1:LINE	chr8:85977995-85983030	0.157728	0.570395	0	0	0	0.372564	0	0	0.420701	0.269183	TRUE	0.447532
MMSAT4_dup1271:MMSAT4:Satellite:Satellite	chr13:66574782-66574923	2.26077	2.42418	3.36683	4.58154	2.29378	0.620941	0.849936	0.355393	0.871452	1.48051	TRUE	0.449016
B3_dup119616:B3:B2:SINE	chr14:6429251-6429452	0.0525761	0.0712994	0	0.0694173	0	0.558847	0.424968	0.562706	0.330551	0.915223	TRUE	0.44934
MT2_Mm_dup2253:MT2_Mm:ERVL:LTR	chr15:6538845-6538964	0.157728	0.0712994	0	0.208252	0.084955	0.403612	0.273194	0.503474	0.390651	0.349938	TRUE	0.449352
B2_Mm1t_dup19433:B2_Mm1t:B2:SINE	chr15:34401222-34401381	0.736066	0.142599	0.264065	0.138835	0.084955	0.31047	0.667807	0.503474	1.05175	0.242265	TRUE	0.449451
B2_Mm1t_dup6543:B2_Mm1t:B2:SINE	chr5:98531017-98531204	0	0	0	0.277669	0.16991	0	0.242839	0.355393	0.0901502	0	TRUE	0.449812
RLTR40_dup667:RLTR40:ERVK:LTR	chr4:146625826-146626198	0.0525761	2.42418	0.462115	0	0	0.589894	0	0	1.0818	0	TRUE	0.449924
RLTR40_dup675:RLTR40:ERVK:LTR	chr4:147146723-147147095	0	2.13898	0.462115	0	0	0.589894	0	0	1.0818	0	TRUE	0.449924
L1Md_T_dup8893:L1Md_T:L1:LINE	chr7:3789146-3794868	0.473185	0	0	0	0	0	0.941001	0.562706	0.540901	0.619122	TRUE	0.45035
L1Md_T_dup3998:L1Md_T:L1:LINE	chr3:64821263-64823623	0	0.213898	0.594147	0.416504	0.16991	0.589894	0.424968	0.681171	0.691152	0.48453	TRUE	0.450496
MMSAT4_dup263:MMSAT4:Satellite:Satellite	chr4:146466350-146467708	12.6709	17.0406	23.1717	18.3262	17.6706	22.3228	9.89568	13.7715	20.8247	24.2803	TRUE	0.450801
L1_Mus3_dup38922:L1_Mus3:L1:LINE	chr13:109339213-109339972	0.525761	0.356497	0.594147	0.0694173	0.084955	0.0620941	0.698162	0.740403	0.240401	0.403775	TRUE	0.451644
MurSatRep1_dup2128:MurSatRep1:MurSatRep1:Unknown	chr13:66333962-66334114	0.420609	0.213898	0.594147	0	0.67964	0.248376	0.212484	0	0.300501	0.538367	TRUE	0.451777
B2_Mm1a_dup5393:B2_Mm1a:B2:SINE	chr5:123621188-123621374	0.210305	0.285198	0	0.416504	0.254865	0.031047	0.394613	0.473858	0.300501	0	TRUE	0.451917
L1Md_T_dup9755:L1Md_T:L1:LINE	chr7:90716860-90723070	0	0	0	0.485921	0	0.186282	1.00171	0.681171	0.991652	0.48453	TRUE	0.452357
MMETn-int_dup976:MMETn-int:ERVK:LTR	chr19:40955934-40956630	0	0	0.396098	0	0	0	1.00171	1.27349	0.270451	0.269183	TRUE	0.453168
B3_dup71284:B3:B2:SINE	chr8:128753589-128753612	0.262881	0.356497	0.264065	0.485921	0.16991	0.776176	0.394613	0.888483	0.691152	0.538367	TRUE	0.453304
RLTR13B1_dup848:RLTR13B1:ERVK:LTR	chr12:20908264-20908662	0.105152	0.285198	0.198049	0	0.254865	0.248376	0.151774	0.177697	0.330551	0.215347	TRUE	0.453404
L1Md_T_dup16558:L1Md_T:L1:LINE	chr10:122391377-122397234	1.15668	1.06949	0.462115	0	0.84955	1.67654	1.24455	1.36234	2.1035	1.80353	TRUE	0.454008
RLTR1B-int_dup410:RLTR1B-int:ERV1:LTR	chrX:30392081-30392979	0	0.0712994	0	2.42961	0	0.434659	0	0	0.781302	0	TRUE	0.454889
B2_Mm1t_dup9884:B2_Mm1t:B2:SINE	chr8:4745673-4745819	0.0525761	0.142599	0.132033	0.277669	0.16991	0.31047	0.151774	0.385009	0.1202	0.32302	TRUE	0.455684
L1Md_T_dup22657:L1Md_T:L1:LINE	chr18:5751054-5757356	0.105152	0.499096	0.198049	0.347086	0.84955	0.434659	0.333903	0.207313	0.631051	0.538367	TRUE	0.455746
RSINE1_dup30931:RSINE1:B4:SINE	chr5:30875385-30875463	2.36593	2.06768	1.25431	2.22135	2.12387	2.23539	1.69987	2.63583	2.82471	1.58818	TRUE	0.455765
MTA_Mm-int_dup493:MTA_Mm-int:ERVL-MaLR:LTR	chr2:176533373-176534360	1.20925	0.855593	0.198049	0.971842	0	0.807223	0.151774	0.236929	1.29215	0.188428	TRUE	0.455796
Lx3_Mus_dup9942:Lx3_Mus:L1:LINE	chr14:4735336-4735470	0.368033	0.0712994	0.924229	0.138835	0.254865	0.869317	0.212484	1.03656	0.631051	0.269183	TRUE	0.455879
B2_Mm1a_dup15866:B2_Mm1a:B2:SINE	chr16:17475617-17475800	0.841218	0.784294	0.462115	0	0	0.714082	0.728517	0.9181	0.961602	0.699877	TRUE	0.456184
L1Md_T_dup6636:L1Md_T:L1:LINE	chr5:36237785-36244923	3.36487	6.27435	3.10277	6.66406	3.56811	6.51988	10.351	6.16015	16.0467	7.94091	TRUE	0.456347
L1Md_T_dup5756:L1Md_T:L1:LINE	chr4:77112858-77116897	0	0.142599	0.0660164	0	0.50973	0.341517	0.485678	0.207313	0.811352	0.457612	TRUE	0.456666
Lx4A_dup2716:Lx4A:L1:LINE	chr4:144705815-144708253	0.525761	0.0712994	0.462115	0.277669	0	0.248376	0.121419	0.207313	0.21035	0.242265	TRUE	0.45668
B2_Mm1a_dup11817:B2_Mm1a:B2:SINE	chr11:69985989-69986181	0.841218	0	0.0660164	0.485921	0.934505	0.372564	0	0.0592322	0.1202	0.48453	TRUE	0.457019
ORR1A0-int_dup243:ORR1A0-int:ERVL-MaLR:LTR	chr9:15568859-15570629	0	0	0.330082	0	0	0	0.849936	0.236929	0.360601	0.915223	TRUE	0.457339
B2_Mm1a_dup16616:B2_Mm1a:B2:SINE	chr17:30628584-30628769	0	0.499096	0	0.138835	1.52919	1.0556	0.637452	1.24388	0.871452	0.888305	TRUE	0.458142
B2_Mm1a_dup6940:B2_Mm1a:B2:SINE	chr7:29826743-29826901	2.99684	1.35469	1.78244	0.555338	1.61414	1.24188	1.00171	1.33273	1.5626	1.07673	TRUE	0.458659
MMSAT4_dup271:MMSAT4:Satellite:Satellite	chr4:147258666-147259375	0.368033	0.213898	0.660164	0.277669	0.424775	0.434659	0.0303549	0.118464	0.270451	0.430693	TRUE	0.459763
MurSatRep1_dup559:MurSatRep1:MurSatRep1:Unknown	chr6:36956804-36956915	0.420609	0.213898	0.0660164	0.208252	0.594685	0.496753	0.455323	0.799635	0.420701	0.457612	TRUE	0.459783
B2_Mm1a_dup16823:B2_Mm1a:B2:SINE	chr17:47499881-47500000	2.83911	2.13898	1.91447	2.49902	3.22829	2.73214	1.66952	2.99123	2.58431	2.18039	TRUE	0.459834
B2_Mm2_dup38331:B2_Mm2:B2:SINE	chr8:20287060-20287245	0.420609	0.427797	0.462115	0.277669	0.424775	0.124188	0.424968	0.325777	0.420701	0.215347	TRUE	0.461331
B2_Mm2_dup38335:B2_Mm2:B2:SINE	chr8:20414304-20414489	0.420609	0.427797	0.462115	0.277669	0.424775	0.124188	0.424968	0.325777	0.420701	0.215347	TRUE	0.461331
MTA_Mm_dup4329:MTA_Mm:ERVL-MaLR:LTR	chr4:147034317-147034709	0.105152	1.49729	0.594147	0.277669	0.764595	1.14874	1.5481	1.74735	1.17195	1.80353	TRUE	0.461361
RLTRETN_Mm_dup861:RLTRETN_Mm:ERVK:LTR	chr12:4552448-4552750	0	0.0712994	0.660164	0	0	0.5278	0	0.236929	0.390651	0.296102	TRUE	0.46153
ETnERV-int_dup9:ETnERV-int:ERVK:LTR	chr1:11624223-11624576	29.4952	21.2472	43.7028	49.0086	45.4509	52.7489	45.8358	63.9412	49.4624	59.0319	TRUE	0.461665
MLTR25A_dup323:MLTR25A:ERVK:LTR	chr2:176704952-176706004	0	1.21209	0.0660164	0	0	0.5278	0.607097	0.0296161	1.17195	0.780632	TRUE	0.462023
L1Md_F3_dup2022:L1Md_F3:L1:LINE	chr2:177913994-177917361	1.36698	0.926892	0.396098	1.11068	0	0	1.12313	0.385009	1.17195	0.403775	TRUE	0.462139
L1Md_Gf_dup114:L1Md_Gf:L1:LINE	chr2:162373526-162374409	0.525761	0	0	0	0.16991	0.279423	0.394613	0.325777	0.15025	0.699877	TRUE	0.462311
B3_dup119571:B3:B2:SINE	chr14:4492856-4493061	0.105152	0	0.264065	0.416504	0	0	0.273194	0.207313	0	0.269183	TRUE	0.462368
MER5A1_dup2711:MER5A1:hAT-Charlie:DNA	chr12:19612210-19612362	0.525761	0.142599	0	0	0	0.124188	0.242839	0.118464	0.0901502	0.430693	TRUE	0.462698
MTEb_dup2780:MTEb:ERVL-MaLR:LTR	chr4:146639174-146639513	1.62986	1.42599	2.70667	2.22135	1.01946	1.36607	0.910646	1.00695	1.47245	1.48051	TRUE	0.463062
MMSAT4_dup272:MMSAT4:Satellite:Satellite	chr4:147331650-147333183	12.776	14.8303	29.5753	42.5528	12.1486	14.7163	10.3814	6.51555	15.9866	21.1309	TRUE	0.463173
MurSatRep1_dup2198:MurSatRep1:MurSatRep1:Unknown	chr13:66851059-66851357	0	0.855593	2.31057	3.67912	1.35928	0.962458	0.182129	0.266545	0.510851	1.21133	TRUE	0.46332
L1_Mm_dup1017:L1_Mm:L1:LINE	chr3:136204197-136205012	0	0.0712994	0.132033	0.138835	0.33982	0.248376	0	0.0888483	0.1803	0.16151	TRUE	0.463837
B2_Mm1a_dup5088:B2_Mm1a:B2:SINE	chr5:104540260-104540453	0.841218	0.142599	0	0	0	0.5278	1.18384	1.33273	0.691152	0.942142	TRUE	0.463986
L1Md_Gf_dup1070:L1Md_Gf:L1:LINE	chr18:88619499-88624037	0.525761	1.14079	0.792196	1.11068	0	0.31047	0	0.266545	0	0.269183	TRUE	0.465039
RLTR45-int_dup399:RLTR45-int:ERVK:LTR	chr6:128860558-128861080	2.83911	2.28158	2.44261	1.04126	0.084955	2.35958	2.00342	3.40585	1.77295	2.3419	TRUE	0.465297
L1_Mm_dup1091:L1_Mm:L1:LINE	chr4:19416946-19418066	0.68349	0.712994	0	0	0	0.589894	1.00171	0.562706	1.29215	0.888305	TRUE	0.46533
B2_Mm1t_dup21014:B2_Mm1t:B2:SINE	chr17:21430705-21430864	0.68349	1.21209	0.264065	0	0.16991	0.589894	0.455323	0.296161	1.5025	0	TRUE	0.465715
IAPEz-int_dup1240:IAPEz-int:ERVK:LTR	chr3:64657927-64660901	0.998947	0.784294	2.24456	0	0	0.155235	0.880291	0.148081	1.202	0.430693	TRUE	0.465884
IMPB_01_dup21383:IMPB_01:Satellite:Satellite	chr14:39655940-39656174	0.0525761	0	0.132033	0	0.084955	0.558847	0	0.355393	0.0901502	0.511448	TRUE	0.466935
MTA_Mm-int_dup264:MTA_Mm-int:ERVL-MaLR:LTR	chr1:188645617-188646064	0	0.213898	0	0	0	0.217329	0.303549	0.355393	0.240401	0.296102	TRUE	0.466956
L1Md_T_dup7352:L1Md_T:L1:LINE	chr5:97988726-97994829	0	0.0712994	0	0.971842	0	0	1.60881	0.770019	1.47245	0.511448	TRUE	0.467031
B2_Mm1a_dup4543:B2_Mm1a:B2:SINE	chr4:155106870-155107061	0	0	0.462115	0	0	0.124188	0.576742	0.740403	0	0.457612	TRUE	0.467409
RMER16-int_dup2224:RMER16-int:ERVK:LTR	chr15:39246122-39246312	0	3.70757	0.72618	2.56844	6.88135	0	4.82642	3.10969	4.32721	0.80755	TRUE	0.467553
RLTR1B-int_dup172:RLTR1B-int:ERV1:LTR	chr4:66902813-66902916	4.99473	4.34926	8.71416	7.14998	7.05126	5.86789	6.82984	5.41975	6.01001	10.229	TRUE	0.467914
RLTR4_MM-int_dup130:RLTR4_MM-int:ERV1:LTR	chr4:134159938-134162061	0.578338	1.21209	1.45236	1.80485	2.03892	6.61302	8.16546	9.59562	8.59432	6.99877	TRUE	0.468104
B2_Mm1a_dup11962:B2_Mm1a:B2:SINE	chr11:77551907-77552064	2.05047	1.92508	2.24456	1.5966	2.37874	1.5213	1.63916	1.8362	2.52421	1.0229	TRUE	0.468264
RMER10A_dup580:RMER10A:ERVL:LTR	chr2:177470605-177470774	3.04942	3.77887	1.12228	2.29077	2.12387	1.76968	1.2749	1.24388	2.1636	1.77661	TRUE	0.468351
MurSatRep1_dup2185:MurSatRep1:MurSatRep1:Unknown	chr13:66672617-66673880	1.62986	0.926892	1.25431	1.5966	1.6991	1.11769	0.789226	1.03656	0.510851	1.69586	TRUE	0.468634
B1_Mus2_dup28635:B1_Mus2:Alu:SINE	chr7:101962440-101962586	0.157728	0.142599	0.330082	0.138835	0.084955	0.0620941	0.242839	0.325777	0.0300501	0.16151	TRUE	0.469254
L1Md_T_dup4866:L1Md_T:L1:LINE	chr4:18606847-18612728	0.210305	0.641695	0	0.416504	0.084955	0.651988	1.882	1.15503	1.7429	1.39975	TRUE	0.469334
RLTR20D_dup233:RLTR20D:ERVK:LTR	chr4:146640255-146640464	1.15668	0.855593	0.660164	0.694173	0.764595	1.11769	1.42668	1.42157	1.41235	1.48051	TRUE	0.469384
RLTR20D_dup235:RLTR20D:ERVK:LTR	chr4:147161139-147161348	1.15668	0.855593	0.660164	0.694173	0.764595	1.11769	1.42668	1.42157	1.41235	1.48051	TRUE	0.469384
B2_Mm1a_dup11786:B2_Mm1a:B2:SINE	chr11:68729464-68729655	1.26183	0.0712994	0.264065	0.208252	0	1.14874	0	0.562706	1.1419	0.242265	TRUE	0.469514
L1Md_T_dup22187:L1Md_T:L1:LINE	chr17:40796787-40801170	0	0.570395	1.12228	1.24951	0.67964	0.714082	1.09277	0.562706	1.65275	0.834468	TRUE	0.470518
MMSAT4_dup277:MMSAT4:Satellite:Satellite	chr4:147674054-147675671	8.35961	7.55774	13.1373	21.3805	7.22117	9.25202	3.88542	2.7543	7.12187	12.2748	TRUE	0.470796
L1_Mus3_dup11819:L1_Mus3:L1:LINE	chr4:146978361-146978872	0.157728	0.356497	0.198049	0.624756	0.424775	0.248376	0.455323	0.266545	0.300501	0.619122	TRUE	0.470866
IAPLTR2_Mm_dup596:IAPLTR2_Mm:ERVK:LTR	chr7:122052124-122052319	0.262881	0.0712994	0.0660164	0.208252	0.084955	0.217329	0.394613	0.355393	0.270451	0.403775	TRUE	0.471321
L1Md_T_dup19917:L1Md_T:L1:LINE	chr14:92228252-92234491	0	0	0	0.208252	0	0.217329	0.849936	0.236929	1.2621	0.296102	TRUE	0.471403
IAPEz-int_dup6833:IAPEz-int:ERVK:LTR	chr17:50074463-50077165	2.47108	0.855593	1.71643	0	2.46369	0.434659	0.242839	0	0.601001	0.538367	TRUE	0.471442
ORR1A1_dup480:ORR1A1:ERVL-MaLR:LTR	chr2:163069354-163069698	0.368033	1.14079	0.462115	0.138835	0.254865	0.434659	0.576742	0.118464	0.961602	0.619122	TRUE	0.471693
RLTR4_Mm_dup231:RLTR4_Mm:ERV1:LTR	chr18:82693551-82694247	0.210305	0.0712994	0	0	0	0.589894	0.0607097	0.562706	0.1803	0.349938	TRUE	0.471714
MMETn-int_dup835:MMETn-int:ERVK:LTR	chr15:55871786-55875069	6.09883	4.13537	0	3.26261	0	1.08665	2.88371	5.12359	1.53255	0	TRUE	0.472224
B3_dup68706:B3:B2:SINE	chr8:91336684-91336807	0.473185	0.213898	0.0660164	0.485921	0.33982	0.248376	0.273194	0.296161	0.1202	0.457612	TRUE	0.472343
L1Md_T_dup11322:L1Md_T:L1:LINE	chr9:16452714-16457924	0	0.285198	0	0	0	0.589894	0	0.236929	0.751252	0	TRUE	0.472414
B2_Mm1t_dup11662:B2_Mm1t:B2:SINE	chr9:72594380-72594545	0.788642	0	0.792196	0.208252	0.254865	0.83827	1.36597	1.0958	1.65275	0.942142	TRUE	0.472536
L1Md_T_dup6367:L1Md_T:L1:LINE	chr5:8704728-8712201	0.420609	0.285198	1.12228	0	0.594685	0.186282	2.36768	0	1.89315	2.36881	TRUE	0.47337
B3_dup36027:B3:B2:SINE	chr4:146643454-146643530	0.736066	0.570395	0.528131	0.416504	0.50973	0.465706	0.485678	0.473858	0.601001	0.511448	TRUE	0.473579
B3_dup36057:B3:B2:SINE	chr4:147164337-147164413	0.736066	0.570395	0.528131	0.416504	0.50973	0.465706	0.485678	0.473858	0.601001	0.511448	TRUE	0.473579
IAPEz-int_dup4992:IAPEz-int:ERVK:LTR	chr11:116389793-116391050	3.10199	2.13898	1.84846	3.67912	0.33982	2.42167	2.73194	5.24205	2.0434	1.29208	TRUE	0.474027
RMER16A2_dup234:RMER16A2:ERVK:LTR	chr18:44737144-44737228	6.41429	7.48644	9.70441	11.1068	8.4955	3.01156	3.67294	3.52432	3.69616	3.90316	TRUE	0.474069
RLTR6_Mm_dup98:RLTR6_Mm:ERV1:LTR	chr9:42991190-42991792	0.315457	0.0712994	0.0660164	0.833008	0.934505	0.745129	0.242839	0.710787	0.931552	0	TRUE	0.474332
L1Md_F2_dup42876:L1Md_F2:L1:LINE	chr10:40299054-40299422	0.525761	0.142599	0	0.138835	0	0.0620941	0.303549	0.148081	0.270451	0.188428	TRUE	0.474687
B2_Mm1t_dup5801:B2_Mm1t:B2:SINE	chr4:150381500-150381657	0.210305	0.142599	0.264065	0.0694173	0.254865	0.155235	0.333903	0	0.300501	0.511448	TRUE	0.47469
B2_Mm2_dup38329:B2_Mm2:B2:SINE	chr8:20264881-20265067	1.57728	0.570395	0.72618	1.24951	2.54865	0.931411	1.2749	0.858867	1.3222	1.48051	TRUE	0.474745
B2_Mm1t_dup3206:B2_Mm1t:B2:SINE	chr2:181625548-181625735	0.420609	0	0	0.624756	0.67964	0.341517	0	0.355393	0.21035	0	TRUE	0.475201
Tigger1_dup294:Tigger1:TcMar-Tigger:DNA	chr4:147316919-147317248	1.89274	1.21209	2.77269	3.88737	1.95396	1.73863	0.364258	0.799635	1.05175	1.6151	TRUE	0.476427
L1Md_T_dup6190:L1Md_T:L1:LINE	chr4:115344495-115351918	0	0.142599	1.51838	0.833008	0.424775	0.31047	2.06413	0.325777	1.8631	1.72277	TRUE	0.476601
B2_Mm1a_dup13182:B2_Mm1a:B2:SINE	chr12:55411100-55411289	0.578338	0	0	0	0.424775	0.745129	0	0.355393	0.360601	0.511448	TRUE	0.476601
MT2_Mm_dup1247:MT2_Mm:ERVL:LTR	chr8:124846028-124846520	0	0.356497	0.264065	0.138835	0	0.217329	0	0.236929	0.1202	0	TRUE	0.477211
MT2_Mm_dup1121:MT2_Mm:ERVL:LTR	chr7:129667112-129667610	0.420609	0.499096	0.330082	0.485921	0	0.403612	0	0	0.15025	0.511448	TRUE	0.477792
B2_Mm1t_dup15254:B2_Mm1t:B2:SINE	chr11:68813878-68814037	0.473185	0	0	0.347086	0	0.031047	0.607097	0.414626	0.330551	0.296102	TRUE	0.478969
RMER10A_dup562:RMER10A:ERVL:LTR	chr2:176716832-176717001	1.52471	0.356497	0.858213	2.08252	0.594685	0.434659	0.849936	0.414626	0.601001	1.07673	TRUE	0.479416
L1_Mus1_dup26841:L1_Mus1:L1:LINE	chr19:23216095-23216546	0.157728	0.427797	0.198049	0.0694173	0.16991	0.186282	0.0910646	0	0.450751	0	TRUE	0.479965
MTD_dup859:MTD:ERVL-MaLR:LTR	chr1:42334572-42334669	0.262881	0.142599	0.264065	0.555338	0.16991	1.24188	1.18384	0.977332	1.6828	1.26516	TRUE	0.481047
RMER16-int_dup770:RMER16-int:ERVK:LTR	chr5:98007086-98007796	0	0	0	3.40145	4.50261	0	1.82129	0	0.631051	2.31498	TRUE	0.481147
MurSatRep1_dup372:MurSatRep1:MurSatRep1:Unknown	chr4:145534844-145534956	0.68349	0.356497	0.264065	0.694173	0.16991	0.248376	0.728517	0.53309	0.961602	0.080755	TRUE	0.481895
B2_Mm1t_dup819:B2_Mm1t:B2:SINE	chr1:128092728-128092912	0.998947	0.0712994	0	0.347086	0	0.869317	0	0	1.05175	0.349938	TRUE	0.481943
MurSatRep1_dup1074:MurSatRep1:MurSatRep1:Unknown	chrX:108893554-108893641	0.368033	0.570395	0.264065	0.555338	0.934505	0.776176	0.0607097	0.651555	0.480801	0.215347	TRUE	0.482257
L1Md_T_dup14402:L1Md_T:L1:LINE	chrY:683888-690068	0.420609	0.213898	0	0	0.084955	0.031047	0.303549	0.148081	0.390651	0	TRUE	0.4823
RLTR19-int_dup2257:RLTR19-int:ERVK:LTR	chr18:27599562-27599671	0.893795	1.06949	0.528131	0	0.764595	0	0.941001	0.562706	0.601001	0.349938	TRUE	0.48254
L1Md_T_dup7009:L1Md_T:L1:LINE	chr5:69531479-69537380	0	0	0.0660164	0.277669	0.33982	0.465706	0.455323	0.118464	0.931552	0.430693	TRUE	0.482677
B2_Mm1t_dup14227:B2_Mm1t:B2:SINE	chr10:87559348-87559531	0.315457	0.499096	0.264065	0	0.084955	0.248376	0	0.236929	0	0.16151	TRUE	0.48322
MIRb_dup30638:MIRb:MIR:SINE	chr12:18064041-18064155	0.262881	0	0.264065	0.485921	0	0.124188	0.516033	0.562706	0.0601001	0.403775	TRUE	0.483328
IMPB_01_dup21507:IMPB_01:Satellite:Satellite	chr14:49728773-49729009	0.157728	0.0712994	0	0	0.16991	0.31047	0.333903	0.355393	0.300501	0.376857	TRUE	0.483447
MT2B_dup1491:MT2B:ERVL:LTR	chr2:119612145-119612228	0.210305	0.142599	0	0.0694173	0.084955	0.0931411	0.394613	0.325777	0.240401	0.215347	TRUE	0.483514
B2_Mm1a_dup7570:B2_Mm1a:B2:SINE	chr7:122967602-122967761	0.893795	0.499096	0.396098	0.347086	0	0	0.819581	0	0.450751	0.861387	TRUE	0.483717
L1Md_F2_dup44698:L1Md_F2:L1:LINE	chr10:123063783-123069951	0.525761	0.570395	0.132033	1.24951	1.01946	0.279423	1.12313	0.325777	1.35225	0.565285	TRUE	0.483957
MMETn-int_dup755:MMETn-int:ERVK:LTR	chr13:94080868-94080955	0.157728	0.0712994	2.24456	3.26261	1.35928	0.993505	0.273194	0.177697	0.15025	1.69586	TRUE	0.484231
L1Md_A_dup8213:L1Md_A:L1:LINE	chrX:25679241-25684442	0	0.499096	0	0	0	0.186282	0.667807	0.296161	0.691152	0.376857	TRUE	0.484305
Lx8_dup34533:Lx8:L1:LINE	chr12:18000566-18000694	0.315457	0.213898	0.132033	0.0694173	0.424775	0.372564	0.971355	0.947716	0.360601	0.834468	TRUE	0.484742
B2_Mm1t_dup2060:B2_Mm1t:B2:SINE	chr2:76590711-76590901	0	0.213898	0.198049	0	0.084955	0.745129	0	0.473858	0.390651	0.32302	TRUE	0.484853
B2_Mm1a_dup7234:B2_Mm1a:B2:SINE	chr7:79280399-79280558	1.26183	0.213898	1.45236	2.49902	0	1.76968	1.48739	1.42157	2.49416	1.26516	TRUE	0.485333
B2_Mm2_dup84753:B2_Mm2:B2:SINE	chr17:88478333-88478515	0	0.142599	0	0.138835	0	0	0.394613	0.385009	0	0.242265	TRUE	0.485501
MMSAT4_dup130:MMSAT4:Satellite:Satellite	chr2:175979039-175979159	0.525761	1.99638	1.12228	1.31893	0.934505	0.155235	0.971355	0.236929	0.961602	0.592203	TRUE	0.485513
L1MC1_dup3786:L1MC1:L1:LINE	chr12:18880758-18881025	0.473185	0.285198	0.792196	0.138835	0.594685	0.217329	0.728517	0.236929	1.0217	0.242265	TRUE	0.485935
B2_Mm1a_dup11319:B2_Mm1a:B2:SINE	chr11:5227049-5227139	5.67822	4.91966	2.31057	2.91553	3.14333	2.0491	2.00342	1.62889	2.64441	2.15347	TRUE	0.486087
L1Md_A_dup11420:L1Md_A:L1:LINE	chr10:71559505-71565833	0.525761	0.213898	0	0.208252	0.16991	0	0.455323	0	0.721202	0	TRUE	0.486392
L1Md_A_dup12039:L1Md_A:L1:LINE	chr10:110008982-110015605	0.525761	0	0.132033	0	0.424775	0.341517	0	0	0.540901	0	TRUE	0.48641
RMER6C_dup1352:RMER6C:ERVK:LTR	chr4:146449418-146449760	3.15457	3.49367	0	2.91553	0.764595	3.75669	17.6058	8.05558	8.59432	17.147	TRUE	0.486687
B2_Mm1a_dup15717:B2_Mm1a:B2:SINE	chr16:4895599-4895758	0.157728	0.427797	0.264065	0	0.084955	0.0931411	0	0	0.1202	0.0269183	TRUE	0.487088
RLTR4_MM-int_dup431:RLTR4_MM-int:ERV1:LTR	chr19:60925881-60933459	1.15668	0.855593	0	0	4.50261	5.58847	5.37281	2.19159	4.53756	10.5789	TRUE	0.487168
L1Md_F2_dup13005:L1Md_F2:L1:LINE	chr3:144738219-144743578	0	0	0	0	0.84955	0.124188	0.546387	0	0.601001	0.457612	TRUE	0.487224
RMER10A_dup563:RMER10A:ERVL:LTR	chr2:176805238-176805407	0	0.356497	0.924229	0	0	0.434659	0	0.414626	0.270451	0	TRUE	0.487626
IAPLTR2a2_Mm_dup95:IAPLTR2a2_Mm:ERVK:LTR	chr1:117747174-117747575	0	0.142599	0.0660164	0	0	0.620941	0	0.385009	0	0.592203	TRUE	0.488001
Tigger1_dup292:Tigger1:TcMar-Tigger:DNA	chr4:146984674-146984970	0.578338	0.427797	1.05626	1.45776	0.84955	0.248376	0.212484	0.118464	0.390651	0.215347	TRUE	0.488285
L1Md_F2_dup16952:L1Md_F2:L1:LINE	chr4:147796432-147802584	9.14825	8.91243	5.54538	7.01115	4.84243	8.66212	7.95297	5.12359	14.1836	6.81034	TRUE	0.488294
MMETn-int_dup418:MMETn-int:ERVK:LTR	chr8:128746774-128746860	4.57413	5.84655	4.62115	6.17814	5.01234	4.06716	4.76571	3.64278	5.55926	4.62995	TRUE	0.489242
B2_Mm1a_dup2655:B2_Mm1a:B2:SINE	chr3:79067160-79067317	0.368033	0.0712994	0	0	0.16991	0	0.516033	0.355393	0.450751	0	TRUE	0.489844
L1Md_T_dup6101:L1Md_T:L1:LINE	chr4:110500546-110505738	0.105152	0	0.198049	0.624756	0	0.279423	0.424968	0	0.721202	0.376857	TRUE	0.490376
B1_Mus2_dup28500:B1_Mus2:Alu:SINE	chr7:99308932-99309027	0.157728	0.285198	0	0.208252	0	0.496753	0.242839	0.296161	0.450751	0.403775	TRUE	0.490863
ORR1A4-int_dup505:ORR1A4-int:ERVL-MaLR:LTR	chr6:148185508-148187634	0.0525761	0.142599	0.0660164	0	0.084955	0.465706	0.121419	0.325777	0.21035	0.376857	TRUE	0.490997
MIR_dup28261:MIR:MIR:SINE	chr12:18882004-18882132	1.41956	1.21209	0.330082	1.18009	0.84955	1.64549	1.30526	1.39196	1.202	1.99196	TRUE	0.491135
RLTR6B_Mm_dup543:RLTR6B_Mm:ERV1:LTR	chr13:67791161-67791747	0	0	0	0.277669	0.424775	0	0.364258	0.385009	0.1803	0	TRUE	0.491489
L1Md_T_dup6181:L1Md_T:L1:LINE	chr4:114211607-114218691	1.57728	2.35288	2.11252	1.38835	0.084955	2.1112	3.18726	1.39196	4.05676	2.77259	TRUE	0.491539
MurSatRep1_dup138:MurSatRep1:MurSatRep1:Unknown	chr2:175062926-175064061	4.15352	3.35107	3.10277	1.87427	4.67252	2.32853	2.61052	2.60622	3.03506	2.01888	TRUE	0.491652
RLTR19-int_dup1586:RLTR19-int:ERVK:LTR	chr11:54746106-54746358	1.3144	0.784294	1.32033	0.833008	0.764595	0.745129	0.242839	0.740403	0.360601	0.430693	TRUE	0.491747
L1_Mus2_dup8521:L1_Mus2:L1:LINE	chr8:19689622-19689806	0.841218	0.926892	3.36683	1.73543	0.764595	2.48376	1.63916	3.82048	2.46411	0.080755	TRUE	0.492791
MT2B_dup6052:MT2B:ERVL:LTR	chr7:144859244-144859348	0.157728	0.213898	0.528131	0.555338	0.33982	0.558847	0.0910646	0	0.811352	0.188428	TRUE	0.493692
B2_Mm1a_dup17043:B2_Mm1a:B2:SINE	chr17:80225368-80225549	0	0	0.330082	0	0	0.341517	0	0.444242	0	0.080755	TRUE	0.493868
L1Md_T_dup4102:L1Md_T:L1:LINE	chr3:73093523-73094439	0	0	0.132033	0	0.33982	0.0620941	0.424968	0.177697	0.570951	0	TRUE	0.493897
B2_Mm2_dup43597:B2_Mm2:B2:SINE	chr9:45630217-45630369	0.262881	0.285198	0	0.347086	0.33982	0.217329	0.242839	0.621938	0.0300501	0.0538367	TRUE	0.494423
B2_Mm1a_dup17951:B2_Mm1a:B2:SINE	chr19:23230381-23230539	1.47213	0.285198	1.32033	1.38835	1.78405	0.807223	1.09277	1.21426	1.05175	0.64604	TRUE	0.494615
L1Md_T_dup10426:L1Md_T:L1:LINE	chr8:37845432-37850772	0.841218	0.499096	0	0	0	0.496753	0	0.266545	0.330551	0.16151	TRUE	0.495519
L1Md_T_dup2951:L1Md_T:L1:LINE	chr2:126105830-126109907	0.473185	0.427797	0.594147	0.833008	0	1.21083	1.2749	0.947716	1.4424	1.39975	TRUE	0.495926
B4A_dup84370:B4A:B4:SINE	chr13:66298466-66298750	0.210305	0.641695	0	0.208252	0	0.155235	1.21419	0.177697	1.2621	0.64604	TRUE	0.496172
RLTR13B1_dup1020:RLTR13B1:ERVK:LTR	chr19:13139283-13139582	0.315457	0.213898	0.198049	0	0.67964	1.86282	2.18555	1.8362	2.2237	2.09963	TRUE	0.496445
L1Md_T_dup6165:L1Md_T:L1:LINE	chr4:113546966-113551898	0	0.784294	0.396098	0.347086	0	0.186282	0.333903	0	0.360601	0.430693	TRUE	0.496495
L1_Mus3_dup11828:L1_Mus3:L1:LINE	chr4:147367188-147367694	5.7308	6.20305	5.34733	8.67716	7.56099	4.7502	6.61736	7.07825	4.35726	5.84128	TRUE	0.496716
ETnERV-int_dup180:ETnERV-int:ERVK:LTR	chr5:89208659-89209012	1.62986	1.49729	1.65041	0.694173	6.88135	8.97259	6.76913	8.64791	7.60267	7.67173	TRUE	0.496742
L1Md_F3_dup1998:L1Md_F3:L1:LINE	chr2:176693843-176697208	0.630914	0.570395	0.858213	1.04126	0.50973	0.217329	0	0.0296161	0.300501	0	TRUE	0.496858
ORR1C2-int_dup653:ORR1C2-int:ERVL-MaLR:LTR	chr12:18529654-18530362	0	0.142599	0.858213	0	0.594685	0	0.394613	0.118464	0.480801	0	TRUE	0.496917
L1Md_T_dup20276:L1Md_T:L1:LINE	chr15:66057095-66063323	0.368033	0.499096	0.396098	0.347086	0.67964	0.620941	1.91236	1.06618	1.8631	0.915223	TRUE	0.497085
B2_Mm1t_dup7879:B2_Mm1t:B2:SINE	chr6:72880805-72880991	0.946371	0.499096	0.528131	0	0	0.434659	0	0.325777	0.330551	0	TRUE	0.498341
MurSatRep1_dup2374:MurSatRep1:MurSatRep1:Unknown	chr17:17085221-17086488	0.893795	0.570395	0.924229	1.38835	0	0.714082	0	0	0.270451	0.80755	TRUE	0.4984
L1_Mm_dup4086:L1_Mm:L1:LINE	chr12:61814681-61815591	0.157728	0.142599	0	0	0.254865	0.5278	0.273194	0	0.751252	0.457612	TRUE	0.49847
MTA_Mm_dup4318:MTA_Mm:ERVL-MaLR:LTR	chr4:146171750-146172142	3.25972	0.998192	1.45236	2.49902	2.80351	2.639	2.27661	1.62889	3.87646	1.9112	TRUE	0.498542
B2_Mm1a_dup16826:B2_Mm1a:B2:SINE	chr17:47537046-47537204	1.1041	0.356497	0.132033	0.76359	0.594685	0.434659	0.424968	0.355393	0.510851	0.430693	TRUE	0.49855
B2_Mm1a_dup7099:B2_Mm1a:B2:SINE	chr7:45391349-45391507	0.105152	0.0712994	0.198049	0.555338	0	0	0.364258	0	0.360601	0.188428	TRUE	0.498794
LTR16B_dup180:LTR16B:ERVL:LTR	chr12:20453758-20453951	0.0525761	0.285198	0.0660164	0.416504	0.084955	0.217329	0.182129	0.207313	0.15025	0.242265	TRUE	0.499733
7SK_dup584:7SK:RNA:RNA	chr15:93234363-93234603	0	0.855593	0	0	0	0	0	0	0.691152	0	FALSE	0
B1_Mm_dup28545:B1_Mm:Alu:SINE	chr11:76356456-76356596	0	0.0712994	0.132033	0	0	0	0	0.740403	0.480801	0.349938	FALSE	0
B1_Mm_dup30142:B1_Mm:Alu:SINE	chr12:18537973-18538118	0	1.35469	0	0.971842	1.01946	0	0	0	0.811352	0.619122	FALSE	0
B1_Mm_dup3021:B1_Mm:Alu:SINE	chr2:26639619-26639764	0	0	0.72618	0.416504	0	0	0	0.562706	0.390651	0.457612	FALSE	0
B1_Mm_dup4507:B1_Mm:Alu:SINE	chr2:121222481-121222626	0.157728	0.142599	0	0	0.254865	0	0	0.414626	0	0.134592	FALSE	0
B1_Mus1_dup41912:B1_Mus1:Alu:SINE	chr8:95872612-95872743	0	0.142599	0.198049	0.0694173	0	0	0	0.414626	0.0601001	0.403775	FALSE	0
B1_Mus1_dup44114:B1_Mus1:Alu:SINE	chr9:25730636-25730782	0.210305	0.0712994	0	0.277669	0.254865	0	0	0.385009	0.330551	0.672958	FALSE	0
B1_Mus1_dup74141:B1_Mus1:Alu:SINE	chr13:66223094-66223219	0	0.427797	0	0	1.6991	0	0	3.64278	0.691152	0.64604	FALSE	0
B1_Mus1_dup91783:B1_Mus1:Alu:SINE	chr18:61945653-61945787	0.473185	0	0	0	0	0	0	0.414626	0.270451	0.134592	FALSE	0
B1_Mus2_dup11939:B1_Mus2:Alu:SINE	chr3:103205346-103205492	0	0	0	0.138835	0	0	0	0.385009	0.240401	0.242265	FALSE	0
B1_Mus2_dup20816:B1_Mus2:Alu:SINE	chr5:121459079-121459224	0.0525761	0	0	0.208252	0.16991	0	0	0	0.450751	0.188428	FALSE	0
B1_Mus2_dup2657:B1_Mus2:Alu:SINE	chr1:134121843-134121921	0.105152	0.142599	0	0.0694173	0	0	0	0.266545	0.270451	0.242265	FALSE	0
B1_Mus2_dup28054:B1_Mus2:Alu:SINE	chr7:80183123-80183206	0.0525761	0	0.132033	0.208252	0.16991	0	0	0.0592322	0.240401	0.188428	FALSE	0
B1_Mus2_dup36131:B1_Mus2:Alu:SINE	chr9:105832804-105832941	0.315457	0	0	0	0	0	0	0.53309	0.0601001	0.349938	FALSE	0
B1_Mus2_dup43264:B1_Mus2:Alu:SINE	chr10:80720143-80720287	0	0	0	0	0	0	0	0	1.1419	0	FALSE	0
B1_Mus2_dup49576:B1_Mus2:Alu:SINE	chr11:116180758-116180892	0.0525761	0	0	0	0	0	0	0	0.390651	0.699877	FALSE	0
B2_Mm1a_dup10165:B2_Mm1a:B2:SINE	chrX:116802752-116802906	0.315457	0.641695	0	0	0	0	0	0	0.0601001	0	FALSE	0
B2_Mm1a_dup10497:B2_Mm1a:B2:SINE	chr10:18403109-18403300	0.841218	0	0	0	0	0	0	0	0.390651	0.48453	FALSE	0
B2_Mm1a_dup10686:B2_Mm1a:B2:SINE	chr10:59712879-59713037	0	0.0712994	0	0	0	0	0	0	0.0601001	1.13057	FALSE	0
B2_Mm1a_dup10846:B2_Mm1a:B2:SINE	chr10:76073086-76073273	0	0.0712994	0.132033	0.485921	0	0	0	0.236929	0.240401	0.349938	FALSE	0
B2_Mm1a_dup11295:B2_Mm1a:B2:SINE	chr11:4645429-4645587	0.210305	0	0	0.277669	0.254865	0	0	0	0.1803	0.269183	FALSE	0
B2_Mm1a_dup1189:B2_Mm1a:B2:SINE	chr2:26144856-26145037	0	0.285198	0	0	1.18937	0	0	0	0	0.32302	FALSE	0
B2_Mm1a_dup118:B2_Mm1a:B2:SINE	chr1:35966042-35966227	0	0.499096	0.132033	0	0	0	0	0.53309	0	0	FALSE	0
B2_Mm1a_dup12106:B2_Mm1a:B2:SINE	chr11:84805454-84805648	0.210305	0	0.132033	0	0.16991	0	0	0.947716	0	0.296102	FALSE	0
B2_Mm1a_dup12233:B2_Mm1a:B2:SINE	chr11:94217765-94217941	0.105152	0.570395	0	0.277669	0.084955	0	0	0.118464	0	0	FALSE	0
B2_Mm1a_dup12493:B2_Mm1a:B2:SINE	chr11:103965861-103966047	0.368033	0	0	0	0.50973	0	0	0	0.15025	0.96906	FALSE	0
B2_Mm1a_dup12560:B2_Mm1a:B2:SINE	chr11:107019952-107020142	0	0	0	0	0.84955	0	0	0.355393	0	0	FALSE	0
B2_Mm1a_dup12625:B2_Mm1a:B2:SINE	chr11:114706000-114706191	0.262881	0.285198	0	0	0	0	0	0.266545	0	0.242265	FALSE	0
B2_Mm1a_dup13193:B2_Mm1a:B2:SINE	chr12:57784845-57785031	0	0.142599	0.462115	0.138835	0	0	0	0.118464	0	0.188428	FALSE	0
B2_Mm1a_dup14054:B2_Mm1a:B2:SINE	chr13:65735703-65735892	0.105152	0.0712994	0	0.208252	0.424775	0	0	0.710787	0.480801	0.215347	FALSE	0
B2_Mm1a_dup14190:B2_Mm1a:B2:SINE	chr13:97144534-97144720	0.157728	0.142599	0.0660164	0	0	0	0	0.385009	0.450751	0.296102	FALSE	0
B2_Mm1a_dup14292:B2_Mm1a:B2:SINE	chr13:114498853-114499012	0	0.142599	0.132033	0.485921	0.254865	0	0	0.0592322	0	0	FALSE	0
B2_Mm1a_dup14573:B2_Mm1a:B2:SINE	chr14:45823218-45823413	0	0	0	0	0.594685	0	0	0.355393	0.0901502	0.619122	FALSE	0
B2_Mm1a_dup14671:B2_Mm1a:B2:SINE	chr14:54835900-54836086	0	0	0	0	0.84955	0	0	0	0	0.16151	FALSE	0
B2_Mm1a_dup14692:B2_Mm1a:B2:SINE	chr14:55836794-55836989	0	0	0	0	0.50973	0	0	0.236929	0.390651	0.376857	FALSE	0
B2_Mm1a_dup14712:B2_Mm1a:B2:SINE	chr14:56840332-56840518	0	0	0	0.971842	0.84955	0	0	0	0	0.699877	FALSE	0
B2_Mm1a_dup14909:B2_Mm1a:B2:SINE	chr14:103710398-103710590	0.420609	0	0	0	1.18937	0	0	0	0	0.242265	FALSE	0
B2_Mm1a_dup14917:B2_Mm1a:B2:SINE	chr14:108831591-108831743	0	0.142599	0	0.902425	0	0	0	0	0.21035	0	FALSE	0
B2_Mm1a_dup15009:B2_Mm1a:B2:SINE	chr15:12329469-12329626	0	0.142599	0	0	0	0	0	0.740403	0	0.457612	FALSE	0
B2_Mm1a_dup15460:B2_Mm1a:B2:SINE	chr15:88685934-88686119	0.105152	0.213898	0.132033	0	0.084955	0	0	0	0.330551	0.215347	FALSE	0
B2_Mm1a_dup15607:B2_Mm1a:B2:SINE	chr15:99920935-99921124	0	0	0.462115	0.138835	0.084955	0	0	0	0.480801	0	FALSE	0
B2_Mm1a_dup1597:B2_Mm1a:B2:SINE	chr2:84833501-84833690	0	0	0	0	0.33982	0	0	0	0.360601	0.511448	FALSE	0
B2_Mm1a_dup160:B2_Mm1a:B2:SINE	chr1:39531822-39531980	1.94532	0	0	0	0	0	0	0	0.450751	0	FALSE	0
B2_Mm1a_dup16229:B2_Mm1a:B2:SINE	chr16:89801066-89801257	0	0.427797	0	0	0	0	0	0.207313	0.0300501	0.349938	FALSE	0
B2_Mm1a_dup16753:B2_Mm1a:B2:SINE	chr17:38001966-38002137	0	0.142599	0	0	0	0	0	0.888483	0.0901502	0.672958	FALSE	0
B2_Mm1a_dup16755:B2_Mm1a:B2:SINE	chr17:40746610-40746801	0.788642	0	0	0	0.67964	0	0	0	0.1202	0	FALSE	0
B2_Mm1a_dup17094:B2_Mm1a:B2:SINE	chr17:85636007-85636195	0.420609	0.213898	0	0.277669	0.764595	0	0	0	0.1803	0.0269183	FALSE	0
B2_Mm1a_dup17270:B2_Mm1a:B2:SINE	chr18:31727273-31727421	0.525761	0.0712994	0	0	0	0	0	0.53309	0.661101	0	FALSE	0
B2_Mm1a_dup232:B2_Mm1a:B2:SINE	chr1:58575298-58575455	0	0	0	0.0694173	0.16991	0	0	0	1.0217	0	FALSE	0
B2_Mm1a_dup2366:B2_Mm1a:B2:SINE	chr2:172968395-172968587	0	0	0	0.902425	0	0	0	0	0.510851	0.403775	FALSE	0
B2_Mm1a_dup264:B2_Mm1a:B2:SINE	chr1:60074627-60074817	0	0	0.330082	0	0	0	0	0	0.0901502	0.80755	FALSE	0
B2_Mm1a_dup3209:B2_Mm1a:B2:SINE	chr4:16310892-16311078	0	0.0712994	0	0.416504	0.67964	0	0	0.0592322	0	0	FALSE	0
B2_Mm1a_dup3252:B2_Mm1a:B2:SINE	chr4:33647548-33647722	0	0.142599	0	0	0	0	0	0.621938	0.781302	0.538367	FALSE	0
B2_Mm1a_dup3429:B2_Mm1a:B2:SINE	chr4:59570748-59570936	1.52471	0.712994	0.330082	0	0	0	0	0	0.0601001	0	FALSE	0
B2_Mm1a_dup3441:B2_Mm1a:B2:SINE	chr4:61638255-61638446	0.210305	1.06949	0	0.624756	0	0	0	0	0.0300501	0	FALSE	0
B2_Mm1a_dup4022:B2_Mm1a:B2:SINE	chr4:132485546-132485736	0	0.712994	0	0	0.084955	0	0	0.0296161	0	0.188428	FALSE	0
B2_Mm1a_dup4032:B2_Mm1a:B2:SINE	chr4:132637989-132638179	0.420609	0.356497	0	0	0	0	0	0.710787	0.1803	0.188428	FALSE	0
B2_Mm1a_dup4065:B2_Mm1a:B2:SINE	chr4:133168107-133168281	0.210305	0	0.132033	0.208252	0	0	0	0.414626	0.240401	0	FALSE	0
B2_Mm1a_dup4476:B2_Mm1a:B2:SINE	chr4:150253488-150253686	0.736066	0.0712994	0	0	0	0	0	0	0.240401	0.32302	FALSE	0
B2_Mm1a_dup5257:B2_Mm1a:B2:SINE	chr5:115834268-115834460	0	0	0.462115	0	0	0	0	0.592322	0.300501	0.565285	FALSE	0
B2_Mm1a_dup5826:B2_Mm1a:B2:SINE	chr6:22434137-22434325	0	0.356497	0	0	1.35928	0	0	0	0.0601001	0.995979	FALSE	0
B2_Mm1a_dup6153:B2_Mm1a:B2:SINE	chr6:72715675-72715867	0.210305	0	0	0	0	0	0	0.473858	0.1202	0.215347	FALSE	0
B2_Mm1a_dup6628:B2_Mm1a:B2:SINE	chr6:148990074-148990265	0	0.213898	0	0	0	0	0	0	1.83305	0	FALSE	0
B2_Mm1a_dup6689:B2_Mm1a:B2:SINE	chr7:4816077-4816235	0.578338	0.712994	0.660164	0.624756	0.50973	0	0	0.296161	0.1202	0.32302	FALSE	0
B2_Mm1a_dup6889:B2_Mm1a:B2:SINE	chr7:27680219-27680413	0	0	0.528131	0	0	0	0	0.858867	0	0	FALSE	0
B2_Mm1a_dup7192:B2_Mm1a:B2:SINE	chr7:65714704-65714865	0.105152	1.42599	1.05626	1.52718	2.03892	0	0	0.947716	0.0300501	0	FALSE	0
B2_Mm1a_dup7523:B2_Mm1a:B2:SINE	chr7:116336006-116336197	0	0	0	0	0	0	0	0	1.0818	0	FALSE	0
B2_Mm1a_dup7588:B2_Mm1a:B2:SINE	chr7:126201375-126201531	0	0	0.660164	0	0	0	0	0.236929	0	0.403775	FALSE	0
B2_Mm1a_dup763:B2_Mm1a:B2:SINE	chr1:156522776-156522967	0	0	0	0.416504	0	0	0	0.651555	0	0	FALSE	0
B2_Mm1a_dup7795:B2_Mm1a:B2:SINE	chr8:3555798-3555985	0	0.499096	0.72618	0.138835	0	0	0	0	0	0.16151	FALSE	0
B2_Mm1a_dup8266:B2_Mm1a:B2:SINE	chr8:85706724-85706912	0	0	0	0	0.67964	0	0	0.710787	0.21035	0.080755	FALSE	0
B2_Mm1a_dup8306:B2_Mm1a:B2:SINE	chr8:91132177-91132368	0	0	0.924229	0	0	0	0	0	0.1803	0.0538367	FALSE	0
B2_Mm1a_dup9273:B2_Mm1a:B2:SINE	chr9:72680327-72680515	0.368033	0	0	0.347086	0	0	0	0	0.360601	0.0538367	FALSE	0
B2_Mm1a_dup9420:B2_Mm1a:B2:SINE	chr9:98978485-98978643	0.893795	0.142599	0	0	0.934505	0	0	0.681171	0.901502	0.269183	FALSE	0
B2_Mm1a_dup9549:B2_Mm1a:B2:SINE	chr9:109963561-109963753	0	0.356497	0.264065	0	0	0	0	0.0888483	0.240401	0.48453	FALSE	0
B2_Mm1a_dup9718:B2_Mm1a:B2:SINE	chrX:7681754-7681926	0	0	0	0.138835	0.16991	0	0	0.53309	0	0.242265	FALSE	0
B2_Mm1a_dup9966:B2_Mm1a:B2:SINE	chrX:73748311-73748500	0.736066	0.356497	0	0	0	0	0	0.0592322	0.300501	0.188428	FALSE	0
B2_Mm1t_dup10780:B2_Mm1t:B2:SINE	chr8:111519296-111519488	0	0.641695	0.132033	0	0.16991	0	0	0	0.0901502	0	FALSE	0
B2_Mm1t_dup1100:B2_Mm1t:B2:SINE	chr1:156533785-156533976	0	0	0.660164	0	0.33982	0	0	0	0.1803	0.349938	FALSE	0
B2_Mm1t_dup11715:B2_Mm1t:B2:SINE	chr9:77572956-77573147	0	0	0.264065	0	0	0	0	0.770019	0.0300501	0.32302	FALSE	0
B2_Mm1t_dup11995:B2_Mm1t:B2:SINE	chr9:108016083-108016241	0	0	0	0.416504	0	0	0	0.414626	0	0.430693	FALSE	0
B2_Mm1t_dup12002:B2_Mm1t:B2:SINE	chr9:108198058-108198245	0.473185	0	0	0	0	0	0	0.355393	0	0.215347	FALSE	0
B2_Mm1t_dup12371:B2_Mm1t:B2:SINE	chrX:21472352-21472548	0.157728	0.0712994	0	0.555338	0.33982	0	0	0	0.0901502	0	FALSE	0
B2_Mm1t_dup1267:B2_Mm1t:B2:SINE	chr1:176415025-176415216	1.1041	0	0	0	0	0	0	0	0.240401	0	FALSE	0
B2_Mm1t_dup1423:B2_Mm1t:B2:SINE	chr1:194684462-194684654	0	0	0	0.208252	0.594685	0	0	0	0.0300501	0.269183	FALSE	0
B2_Mm1t_dup14719:B2_Mm1t:B2:SINE	chr11:6489155-6489313	0.525761	0.213898	0	0	0.254865	0	0	0	0.390651	0	FALSE	0
B2_Mm1t_dup14860:B2_Mm1t:B2:SINE	chr11:27063232-27063418	0.68349	0.0712994	0.858213	0	0	0	0	0.414626	0.240401	0	FALSE	0
B2_Mm1t_dup14919:B2_Mm1t:B2:SINE	chr11:37872729-37872918	0	0.213898	0	4.09562	3.48315	0	0	0	0.1803	0	FALSE	0
B2_Mm1t_dup15088:B2_Mm1t:B2:SINE	chr11:55086288-55086474	0	0.213898	0	0	0.254865	0	0	0	0.841402	0	FALSE	0
B2_Mm1t_dup15272:B2_Mm1t:B2:SINE	chr11:69624558-69624743	0.210305	0.0712994	0	0	2.29378	0	0	0.444242	0.21035	1.15749	FALSE	0
B2_Mm1t_dup15931:B2_Mm1t:B2:SINE	chr11:97409936-97410127	0.210305	0	0.330082	0	0	0	0	0.592322	0	0	FALSE	0
B2_Mm1t_dup1685:B2_Mm1t:B2:SINE	chr2:30971752-30971909	0.105152	0	0.132033	0	0.67964	0	0	0.829251	0.240401	0.753713	FALSE	0
B2_Mm1t_dup17108:B2_Mm1t:B2:SINE	chr12:85008909-85009101	0.105152	0	0	0.347086	0	0	0	0	0.1803	0.48453	FALSE	0
B2_Mm1t_dup1802:B2_Mm1t:B2:SINE	chr2:38334584-38334776	0	0.0712994	0.858213	0	0.084955	0	0	0	0.0300501	0.0269183	FALSE	0
B2_Mm1t_dup18041:B2_Mm1t:B2:SINE	chr13:65654344-65654532	0.262881	0.0712994	0.198049	0.347086	0	0	0	0.0592322	0.1803	0	FALSE	0
B2_Mm1t_dup18156:B2_Mm1t:B2:SINE	chr13:82916657-82916848	0.630914	0.0712994	0	0	0.424775	0	0	0	0.631051	0	FALSE	0
B2_Mm1t_dup18817:B2_Mm1t:B2:SINE	chr14:52345002-52345190	0	0	0	0.76359	0	0	0	0.770019	0	0	FALSE	0
B2_Mm1t_dup20684:B2_Mm1t:B2:SINE	chr16:64337469-64337635	0.525761	0	0.264065	0.347086	0	0	0	0	0.1803	0	FALSE	0
B2_Mm1t_dup21560:B2_Mm1t:B2:SINE	chr17:60279723-60279903	0	0	0	0.694173	0.16991	0	0	0.148081	0	0	FALSE	0
B2_Mm1t_dup22066:B2_Mm1t:B2:SINE	chr18:34284087-34284278	0	0.855593	0	0	0	0	0	0	0.1803	0	FALSE	0
B2_Mm1t_dup22120:B2_Mm1t:B2:SINE	chr18:35639666-35639855	0.420609	0	0	0.347086	0.424775	0	0	0.236929	0	0	FALSE	0
B2_Mm1t_dup22144:B2_Mm1t:B2:SINE	chr18:36338546-36338740	1.20925	0.142599	0	0	0	0	0	0	0.0601001	0	FALSE	0
B2_Mm1t_dup22299:B2_Mm1t:B2:SINE	chr18:55755694-55755883	0	0.499096	0.396098	1.11068	1.35928	0	0	0	0	0.16151	FALSE	0
B2_Mm1t_dup2744:B2_Mm1t:B2:SINE	chr2:152877391-152877579	0	0.285198	0	0	0	0	0	0.473858	0.21035	0.349938	FALSE	0
B2_Mm1t_dup3134:B2_Mm1t:B2:SINE	chr2:176817467-176817647	0.630914	0.427797	0	0	0	0	0	0	1.6227	0	FALSE	0
B2_Mm1t_dup3141:B2_Mm1t:B2:SINE	chr2:177019020-177019200	0.630914	0.427797	0	0	0	0	0	0	0.330551	0	FALSE	0
B2_Mm1t_dup3159:B2_Mm1t:B2:SINE	chr2:177825367-177825547	0.630914	0.427797	0	0	0	0	0	0	0.1202	0	FALSE	0
B2_Mm1t_dup3288:B2_Mm1t:B2:SINE	chr3:23338150-23338309	0	1.14079	0.660164	0	0	0	0	0	0.0601001	0	FALSE	0
B2_Mm1t_dup4565:B2_Mm1t:B2:SINE	chr4:46486986-46487176	0.578338	0	0.264065	0.138835	0	0	0	0.0592322	0.1803	0.080755	FALSE	0
B2_Mm1t_dup5329:B2_Mm1t:B2:SINE	chr4:130637258-130637455	0.788642	0.356497	0	0	0	0	0	2.28044	0.450751	0	FALSE	0
B2_Mm1t_dup5615:B2_Mm1t:B2:SINE	chr4:140899286-140899469	0	0	0	0	0.67964	0	0	0	0.0300501	0.538367	FALSE	0
B2_Mm1t_dup5731:B2_Mm1t:B2:SINE	chr4:147567518-147567677	0	0	0.330082	0	0	0	0	0	0.631051	0.188428	FALSE	0
B2_Mm1t_dup6750:B2_Mm1t:B2:SINE	chr5:113083528-113083704	0	0	0.330082	0	0	0	0	0.710787	0.360601	0	FALSE	0
B2_Mm1t_dup7218:B2_Mm1t:B2:SINE	chr5:137722510-137722690	0	0	0	0	0.764595	0	0	0.473858	0.0901502	0	FALSE	0
B2_Mm1t_dup7463:B2_Mm1t:B2:SINE	chr6:5841131-5841321	0	0.0712994	0	0	0	0	0	0	0	1.13057	FALSE	0
B2_Mm1t_dup8022:B2_Mm1t:B2:SINE	chr6:91874847-91875036	0	0.0712994	0	0.624756	0.33982	0	0	0.740403	0	0	FALSE	0
B2_Mm1t_dup8057:B2_Mm1t:B2:SINE	chr6:100164863-100165055	0	0	0	0.138835	0	0	0	0.9181	0.1803	0.188428	FALSE	0
B2_Mm1t_dup8277:B2_Mm1t:B2:SINE	chr6:125065479-125065671	1.20925	1.28339	3.10277	0	0	0	0	0.681171	1.53255	1.58818	FALSE	0
B2_Mm1t_dup86:B2_Mm1t:B2:SINE	chr1:12762917-12763106	0	0.0712994	0	0	0	0	0	0.473858	0	0.592203	FALSE	0
B2_Mm1t_dup8863:B2_Mm1t:B2:SINE	chr7:34159837-34160028	0	0.784294	0	0	0	0	0	0	0.450751	0	FALSE	0
B2_Mm2_dup12851:B2_Mm2:B2:SINE	chr3:51371451-51371630	0	0.285198	0	0	0.84955	0	0	0.266545	0	0.430693	FALSE	0
B2_Mm2_dup16458:B2_Mm2:B2:SINE	chr4:32575710-32575893	0	0	0	0.347086	0	0	0	0.414626	0.390651	0	FALSE	0
B2_Mm2_dup18569:B2_Mm2:B2:SINE	chr4:108162518-108162675	0.630914	0	0.132033	0.138835	0	0	0	0	0.300501	0.16151	FALSE	0
B2_Mm2_dup47696:B2_Mm2:B2:SINE	chrX:12328195-12328353	0	0	0.198049	0	0.16991	0	0	1.0958	0.540901	0.376857	FALSE	0
B2_Mm2_dup60177:B2_Mm2:B2:SINE	chr11:70902598-70902793	0	0	0.72618	0.138835	0	0	0	0	0.1202	0.672958	FALSE	0
B2_Mm2_dup64877:B2_Mm2:B2:SINE	chr12:24116885-24117074	0	0	0	0.347086	0.84955	0	0	0	0.0300501	0	FALSE	0
B2_Mm2_dup89757:B2_Mm2:B2:SINE	chr19:60585867-60586060	0	0.285198	0	0.208252	0	0	0	0.53309	0	0	FALSE	0
B2_Mm2_dup9238:B2_Mm2:B2:SINE	chr2:119829470-119829661	0.788642	0.213898	0	0	0	0	0	0	0.360601	0.269183	FALSE	0
B3_dup119641:B3:B2:SINE	chr14:7577457-7577662	0.105152	0.427797	0	0	0.33982	0	0	0.207313	0.841402	0.16151	FALSE	0
B4A_dup63686:B4A:B4:SINE	chrX:167987348-167987444	0.105152	0.213898	0	0.0694173	0	0	0	0.296161	0.360601	0.242265	FALSE	0
B4A_dup85973:B4A:B4:SINE	chr14:4764071-4764192	0.157728	0	0	0	0	0	0	0	0.691152	1.18441	FALSE	0
B4A_dup85987:B4A:B4:SINE	chr14:5296613-5296733	0	0	0.198049	0.347086	0	0	0	1.68812	0.0901502	0.64604	FALSE	0
B4A_dup86003:B4A:B4:SINE	chr14:5991168-5991289	0	0	0	0	0	0	0	1.03656	0.0601001	0	FALSE	0
ERVB4_1C-LTR_Mm_dup494:ERVB4_1C-LTR_Mm:ERVK:LTR	chrX:17787953-17788074	0	0	1.18829	0	0	0	0	0	0	0.349938	FALSE	0
ERVB4_1C-LTR_Mm_dup607:ERVB4_1C-LTR_Mm:ERVK:LTR	chrY:47720347-47720468	0	0.499096	0	0	0	0	0	0	0.781302	0	FALSE	0
ERVB4_1C-LTR_Mm_dup614:ERVB4_1C-LTR_Mm:ERVK:LTR	chrY:60510723-60510844	0	0.427797	0	0	0	0	0	0	0.691152	0	FALSE	0
ERVB4_1C-LTR_Mm_dup789:ERVB4_1C-LTR_Mm:ERVK:LTR	chr14:49608464-49608585	0	0.712994	4.22505	0	0	0	0	0	0.631051	0	FALSE	0
ERVB4_1C-LTR_Mm_dup928:ERVB4_1C-LTR_Mm:ERVK:LTR	chr18:44739785-44739884	0	0	0.132033	0	0	0	0	0.770019	0.480801	0.107673	FALSE	0
ERVB4_2-I_MM-int_dup8:ERVB4_2-I_MM-int:ERVK:LTR	chr2:50996529-50997304	0	0	0.462115	0	0	0	0	0.355393	0.360601	0	FALSE	0
ERVB4_2-LTR_MM_dup79:ERVB4_2-LTR_MM:ERVK:LTR	chrY:43931401-43931867	0	0.142599	0	0	0	0	0	0.473858	0.0601001	0.80755	FALSE	0
ERVB7_1-LTR_MM_dup189:ERVB7_1-LTR_MM:ERVK:LTR	chr6:7023680-7023996	0.525761	0	0	0	0	0	0	0.385009	0.0300501	0.188428	FALSE	0
ERVB7_1-LTR_MM_dup19:ERVB7_1-LTR_MM:ERVK:LTR	chr1:44826014-44826331	0	0	0	0	0.764595	0	0	0.325777	0.240401	0	FALSE	0
ERVB7_1-LTR_MM_dup471:ERVB7_1-LTR_MM:ERVK:LTR	chr10:56871085-56871403	0	0	0.858213	0	0	0	0	0	0.390651	0	FALSE	0
ERVB7_1-LTR_MM_dup496:ERVB7_1-LTR_MM:ERVK:LTR	chr11:49452340-49452658	0	3.27977	0	0	2.80351	0	0	0	0.901502	2.50341	FALSE	0
ETnERV-int_dup367:ETnERV-int:ERVK:LTR	chr8:78140530-78146912	0	2.70938	0	0.347086	0	0	0	0	0.390651	0	FALSE	0
ETnERV3-int_dup458:ETnERV3-int:ERVK:LTR	chr13:18934011-18939247	0.157728	0	0	0.0694173	0	0	0	0.710787	0.240401	0.134592	FALSE	0
IAPEY3-int_dup700:IAPEY3-int:ERVK:LTR	chr9:20882712-20884336	0.630914	0.356497	0	0.485921	0	0	0	0	0.360601	0.134592	FALSE	0
IAPEY4_I-int_dup197:IAPEY4_I-int:ERVK:LTR	chr7:48124450-48132115	0.630914	0	0	0.138835	0	0	0	0.681171	0	0.457612	FALSE	0
IAPEY4_I-int_dup390:IAPEY4_I-int:ERVK:LTR	chr13:119661932-119669599	0.420609	0.142599	0.264065	0	0	0	0	0	0	0.376857	FALSE	0
IAPEY4_I-int_dup459:IAPEY4_I-int:ERVK:LTR	chr16:90345439-90349546	0	0	0	0.971842	0	0	0	0	0	0.349938	FALSE	0
IAPEY4_LTR_dup51:IAPEY4_LTR:ERVK:LTR	chr10:35075005-35075330	0.262881	0	0.72618	0	0	0	0	0	0.240401	0.619122	FALSE	0
IAPEy-int_dup169:IAPEy-int:ERVK:LTR	chr6:110334621-110337337	0.630914	0	0	0.485921	0	0	0	0.266545	0.21035	0.0538367	FALSE	0
IAPEz-int_dup1257:IAPEz-int:ERVK:LTR	chr3:73734813-73738089	0	0	0	0.971842	0	0	0	0	0.0901502	0	FALSE	0
IAPEz-int_dup1647:IAPEz-int:ERVK:LTR	chr4:75617207-75623587	0.368033	0.142599	0.660164	0	0.594685	0	0	0	0.1803	0.242265	FALSE	0
IAPEz-int_dup1726:IAPEz-int:ERVK:LTR	chr4:111572176-111573459	0	0	0	0	0	0	0	0	0	3.14945	FALSE	0
IAPEz-int_dup1743:IAPEz-int:ERVK:LTR	chr4:117689790-117696180	0	0	0.792196	0	0	0	0	0	0	0.215347	FALSE	0
IAPEz-int_dup1789:IAPEz-int:ERVK:LTR	chr4:144841080-144842778	0	0.356497	0.528131	0.694173	0.084955	0	0	0	0.1202	0.0269183	FALSE	0
IAPEz-int_dup1790:IAPEz-int:ERVK:LTR	chr4:144842766-144844205	0.420609	0.499096	0.528131	0	0.254865	0	0	0	0.21035	0.269183	FALSE	0
IAPEz-int_dup1859:IAPEz-int:ERVK:LTR	chr5:8464995-8465615	0	0	0.396098	0.555338	1.10441	0	0	0	0.0300501	0	FALSE	0
IAPEz-int_dup1944:IAPEz-int:ERVK:LTR	chr5:30223381-30229822	1.3144	0.0712994	0.858213	1.24951	0.594685	0	0	1.06618	0	0	FALSE	0
IAPEz-int_dup2169:IAPEz-int:ERVK:LTR	chr5:109726336-109726438	0.0525761	0.142599	0.0660164	0.208252	0.084955	0	0	0.148081	0.360601	0.430693	FALSE	0
IAPEz-int_dup2199:IAPEz-int:ERVK:LTR	chr5:126962234-126964045	0	0.570395	0.594147	0	0.594685	0	0	0.148081	0.570951	0	FALSE	0
IAPEz-int_dup2375:IAPEz-int:ERVK:LTR	chr6:28924534-28927775	0	0.285198	0.132033	0	0.33982	0	0	0	0.0901502	0.269183	FALSE	0
IAPEz-int_dup2743:IAPEz-int:ERVK:LTR	chr7:15703552-15707072	0	0	0	0	0.84955	0	0	0.207313	0.21035	0	FALSE	0
IAPEz-int_dup274:IAPEz-int:ERVK:LTR	chr1:76776335-76777645	0	0.0712994	0	0	0	0	0	0	2.46411	0	FALSE	0
IAPEz-int_dup2853:IAPEz-int:ERVK:LTR	chr7:54939351-54940451	0	0	0.0660164	0.138835	0	0	0	0.53309	0.390651	0.16151	FALSE	0
IAPEz-int_dup2855:IAPEz-int:ERVK:LTR	chr7:54942656-54943756	0	0	0.0660164	0.138835	0	0	0	0.53309	0.390651	0.16151	FALSE	0
IAPEz-int_dup3115:IAPEz-int:ERVK:LTR	chr8:18578980-18579708	0	0.285198	0.132033	0.347086	0.33982	0	0	0	0.1202	0	FALSE	0
IAPEz-int_dup372:IAPEz-int:ERVK:LTR	chr1:110329453-110330654	0	0.142599	0	0	0	0	0	1.18464	0.0601001	0.457612	FALSE	0
IAPEz-int_dup3732:IAPEz-int:ERVK:LTR	chrX:9386832-9388586	0	0.213898	0.0660164	0.555338	0	0	0	0.562706	0.0300501	0.296102	FALSE	0
IAPEz-int_dup3846:IAPEz-int:ERVK:LTR	chrX:51995271-51998259	0.262881	0	0.330082	0	0	0	0	0.770019	0	0.376857	FALSE	0
IAPEz-int_dup4410:IAPEz-int:ERVK:LTR	chrY:74731940-74732575	2.31335	2.63808	1.25431	1.52718	1.95396	0	0	3.70201	3.21536	2.07271	FALSE	0
IAPEz-int_dup4437:IAPEz-int:ERVK:LTR	chr10:6567136-6570071	0	0	0	0	0	0	0	0.858867	0.330551	0.349938	FALSE	0
IAPEz-int_dup4571:IAPEz-int:ERVK:LTR	chr10:50491660-50492328	0	0	0	0	0	0	0	0.621938	0.21035	0.269183	FALSE	0
IAPEz-int_dup4618:IAPEz-int:ERVK:LTR	chr10:77951084-77957531	0	0.0712994	0	0	0	0	0	0.0296161	1.41235	0.511448	FALSE	0
IAPEz-int_dup4693:IAPEz-int:ERVK:LTR	chr10:100580077-100580338	0	0	0.132033	0	0.254865	0	0	0	0	0.753713	FALSE	0
IAPEz-int_dup4849:IAPEz-int:ERVK:LTR	chr11:23244258-23246939	0	0.0712994	0	0	0	0	0	0.53309	0.1202	1.15749	FALSE	0
IAPEz-int_dup4864:IAPEz-int:ERVK:LTR	chr11:29124894-29126164	0	0.0712994	0.72618	0	0	0	0	0	1.05175	0	FALSE	0
IAPEz-int_dup4883:IAPEz-int:ERVK:LTR	chr11:38481873-38486204	0	0.712994	0	0	0	0	0	0	0.480801	0	FALSE	0
IAPEz-int_dup4897:IAPEz-int:ERVK:LTR	chr11:51668653-51669881	0.262881	1.06949	0	0	0	0	0	0	0.300501	0.16151	FALSE	0
IAPEz-int_dup4987:IAPEz-int:ERVK:LTR	chr11:110020945-110024044	0	0.570395	0	0	0	0	0	0.207313	0	0.565285	FALSE	0
IAPEz-int_dup5353:IAPEz-int:ERVK:LTR	chr13:5282033-5283690	0.420609	0	0	0	0	0	0	0.266545	0.450751	0	FALSE	0
IAPEz-int_dup5399:IAPEz-int:ERVK:LTR	chr13:13938671-13939118	0	0.0712994	0.132033	0	0.084955	0	0	0.444242	0	0.296102	FALSE	0
IAPEz-int_dup5634:IAPEz-int:ERVK:LTR	chr13:97848418-97849674	1.05152	0.427797	0.72618	2.70727	2.20883	0	0	0	0.360601	0.64604	FALSE	0
IAPEz-int_dup5655:IAPEz-int:ERVK:LTR	chr13:104994952-104996431	0.262881	0	0	0	0.33982	0	0	0.266545	0.15025	0	FALSE	0
IAPEz-int_dup5817:IAPEz-int:ERVK:LTR	chr14:37502135-37504745	0	0	0	0.485921	0	0	0	0.236929	0.270451	0.134592	FALSE	0
IAPEz-int_dup5873:IAPEz-int:ERVK:LTR	chr14:53478359-53479337	0	0.142599	0	0	0	0	0	0.740403	0.1202	0.188428	FALSE	0
IAPEz-int_dup5915:IAPEz-int:ERVK:LTR	chr14:78335175-78336423	0	0	0	1.11068	0.16991	0	0	0.710787	0.510851	0	FALSE	0
IAPEz-int_dup6110:IAPEz-int:ERVK:LTR	chr14:124684888-124691359	0.788642	0	0	0	0	0	0	0	0.0601001	0.296102	FALSE	0
IAPEz-int_dup6139:IAPEz-int:ERVK:LTR	chr15:12527284-12527942	0	0	0.198049	0	0.254865	0	0	0.325777	0.450751	0.242265	FALSE	0
IAPEz-int_dup6450:IAPEz-int:ERVK:LTR	chr16:19588177-19590655	1.1041	0.142599	0	0	0	0	0	0	0.270451	0.134592	FALSE	0
IAPEz-int_dup6530:IAPEz-int:ERVK:LTR	chr16:53015030-53017557	0	0	0.330082	0.277669	0.254865	0	0	0.414626	0	0	FALSE	0
IAPEz-int_dup6607:IAPEz-int:ERVK:LTR	chr16:74772218-74778662	1.15668	0.356497	0	0	0	0	0	0	0.751252	0.430693	FALSE	0
IAPEz-int_dup6788:IAPEz-int:ERVK:LTR	chr17:34219699-34220753	0.473185	0.499096	0.264065	0.485921	0	0	0	0.473858	0	0.672958	FALSE	0
IAPEz-int_dup6931:IAPEz-int:ERVK:LTR	chr17:77922037-77924978	0.525761	0.356497	0	0	0.594685	0	0	0.236929	0	0.376857	FALSE	0
IAPEz-int_dup6968:IAPEz-int:ERVK:LTR	chr18:27000001-27005109	0	0.213898	0	1.31893	0	0	0	0	0.300501	0	FALSE	0
IAPEz-int_dup7132:IAPEz-int:ERVK:LTR	chr18:62274113-62275201	0	0.285198	0	0	0.33982	0	0	0.503474	0	0	FALSE	0
IAPEz-int_dup832:IAPEz-int:ERVK:LTR	chr2:118555270-118555887	0	0.499096	0.462115	0.624756	0	0	0	0.829251	0	0	FALSE	0
IAPEz-int_dup83:IAPEz-int:ERVK:LTR	chr1:23301468-23302730	0.841218	0	0	0	0	0	0	2.0139	2.37396	1.42667	FALSE	0
IAPLTR1_Mm_dup385:IAPLTR1_Mm:ERVK:LTR	chr4:117696181-117696532	0	0	0	0.694173	0	0	0	0	0.21035	0.349938	FALSE	0
IAPLTR1a_Mm_dup1523:IAPLTR1a_Mm:ERVK:LTR	chr16:13099764-13100100	0	0.0712994	0.132033	0.0694173	0.50973	0	0	0	0.300501	0	FALSE	0
IAPLTR2_Mm_dup1064:IAPLTR2_Mm:ERVK:LTR	chr13:98082716-98083172	0	0.142599	0.264065	0	0	0	0	0.118464	0.1803	0.48453	FALSE	0
L1MA9_dup3674:L1MA9:L1:LINE	chr14:6990151-6990246	0.736066	0.285198	0.132033	0.208252	0	0	0	2.87276	0.0601001	0.188428	FALSE	0
L1Md_A_dup10310:L1Md_A:L1:LINE	chrY:28995908-29000000	0.368033	0	0.330082	0.485921	0	0	0	0.444242	1.47245	0.619122	FALSE	0
L1Md_A_dup10536:L1Md_A:L1:LINE	chrY:40225607-40231853	0.946371	0	0	0	0	0	0	0	0.1202	0.349938	FALSE	0
L1Md_A_dup10805:L1Md_A:L1:LINE	chrY:55996298-56000000	0.157728	0.855593	0.0660164	0.208252	0	0	0	0.0888483	0.0300501	0	FALSE	0
L1Md_A_dup10943:L1Md_A:L1:LINE	chrY:63553672-63557160	0.210305	0	0	0	0.254865	0	0	0	0.390651	0.188428	FALSE	0
L1Md_A_dup11286:L1Md_A:L1:LINE	chrY:83459697-83464857	0.578338	0.0712994	0	0	0.67964	0	0	0	0	0.188428	FALSE	0
L1Md_A_dup11419:L1Md_A:L1:LINE	chr10:47574223-47580405	0	0.499096	0	0	0	0	0	0.296161	0.240401	0.269183	FALSE	0
L1Md_A_dup11458:L1Md_A:L1:LINE	chr10:9985968-9992179	0	0	0.198049	0.624756	0	0	0	0	0	0.457612	FALSE	0
L1Md_A_dup11671:L1Md_A:L1:LINE	chr10:46764287-46767290	0	0	0.330082	0	0	0	0	0.53309	0.0601001	0.403775	FALSE	0
L1Md_A_dup11790:L1Md_A:L1:LINE	chr10:63719816-63722090	0	0	0	0	0.254865	0	0	0.444242	0.570951	0.242265	FALSE	0
L1Md_A_dup11824:L1Md_A:L1:LINE	chr10:66633240-66633757	0.105152	0.213898	0.198049	0.138835	0	0	0	0.503474	1.0217	0.376857	FALSE	0
L1Md_A_dup11891:L1Md_A:L1:LINE	chr10:81782770-81787380	0	0	0	0.347086	0	0	0	0	0.1803	0.511448	FALSE	0
L1Md_A_dup11972:L1Md_A:L1:LINE	chr10:99718954-99725386	0	0	0	0	0.33982	0	0	0	0.570951	0.134592	FALSE	0
L1Md_A_dup12010:L1Md_A:L1:LINE	chr10:104860293-104865203	0	0	0	0.138835	0	0	0	0.0296161	0.570951	0.888305	FALSE	0
L1Md_A_dup12025:L1Md_A:L1:LINE	chr10:106436082-106442698	0	0	0.0660164	0	0	0	0	0	1.11185	0.269183	FALSE	0
L1Md_A_dup12338:L1Md_A:L1:LINE	chr11:45757432-45763070	0	0	0.264065	0.208252	0	0	0	0.0296161	0.991652	0.16151	FALSE	0
L1Md_A_dup12632:L1Md_A:L1:LINE	chr12:16689459-16690149	0.0525761	0	0	0	0	0	0	0.236929	0.480801	0.430693	FALSE	0
L1Md_A_dup1270:L1Md_A:L1:LINE	chr2:96203180-96208954	0	0	0	0	0	0	0	0.296161	0.721202	0.080755	FALSE	0
L1Md_A_dup1275:L1Md_A:L1:LINE	chr2:136965879-136971066	0.105152	0.356497	0	0	0	0	0	0	0.691152	0.269183	FALSE	0
L1Md_A_dup13270:L1Md_A:L1:LINE	chr13:19319323-19321652	0	0.0712994	0	0.833008	0	0	0	0.177697	0.21035	0.296102	FALSE	0
L1Md_A_dup13319:L1Md_A:L1:LINE	chr13:27875836-27882217	0	0.213898	0.462115	0	0	0	0	0.118464	0	0.269183	FALSE	0
L1Md_A_dup13594:L1Md_A:L1:LINE	chr13:87141504-87145210	0	0.0712994	0.264065	0.277669	0	0	0	0.118464	0.300501	0	FALSE	0
L1Md_A_dup13600:L1Md_A:L1:LINE	chr13:87188821-87189813	0.262881	0	0.198049	0	0	0	0	0.385009	0.390651	0.215347	FALSE	0
L1Md_A_dup13735:L1Md_A:L1:LINE	chr14:6549671-6557283	0	0.926892	0	0.277669	0.33982	0	0	0.148081	1.7429	0.861387	FALSE	0
L1Md_A_dup13930:L1Md_A:L1:LINE	chr14:41660442-41666598	0.368033	0	0.396098	0	0	0	0	0.325777	0.390651	0	FALSE	0
L1Md_A_dup14268:L1Md_A:L1:LINE	chr14:97036628-97037749	0.315457	0.356497	0	0.138835	0	0	0	0.118464	0.21035	0	FALSE	0
L1Md_A_dup1444:L1Md_A:L1:LINE	chr2:43350531-43356653	0	0	0	0.208252	0	0	0	0.355393	0.0601001	0.376857	FALSE	0
L1Md_A_dup14756:L1Md_A:L1:LINE	chr15:42354869-42361098	0	0	0.462115	0	0.16991	0	0	0.325777	0	0.619122	FALSE	0
L1Md_A_dup14902:L1Md_A:L1:LINE	chr15:60180719-60183772	0	0.285198	0	0	0.16991	0	0	0	0.360601	0.215347	FALSE	0
L1Md_A_dup14971:L1Md_A:L1:LINE	chr15:69149054-69150049	0	0	0	0.624756	0.33982	0	0	0.236929	0.0901502	0.188428	FALSE	0
L1Md_A_dup14977:L1Md_A:L1:LINE	chr15:69642062-69648260	0	0.0712994	0	0.624756	0	0	0	0.118464	0.631051	0	FALSE	0
L1Md_A_dup14990:L1Md_A:L1:LINE	chr15:70895019-70900273	0	0	0	0.555338	0	0	0	0.325777	0.811352	0.188428	FALSE	0
L1Md_A_dup15177:L1Md_A:L1:LINE	chr16:26937323-26943248	0	0	0	0.416504	0	0	0	0	0.901502	0.592203	FALSE	0
L1Md_A_dup15297:L1Md_A:L1:LINE	chr16:48656226-48661420	0	0.641695	0	0	0.594685	0	0	0	0.540901	0	FALSE	0
L1Md_A_dup15735:L1Md_A:L1:LINE	chr17:21598142-21603449	0.788642	0	0	0	0.254865	0	0	0	0.360601	0	FALSE	0
L1Md_A_dup15818:L1Md_A:L1:LINE	chr17:40458152-40459100	0	0.142599	0	0.416504	0	0	0	0.592322	0.1202	0	FALSE	0
L1Md_A_dup15925:L1Md_A:L1:LINE	chr17:58735841-58736834	0.262881	0	0	0.208252	0.254865	0	0	0	0.0901502	0.215347	FALSE	0
L1Md_A_dup15993:L1Md_A:L1:LINE	chr17:75937776-75942976	0.0525761	0	0	0	0	0	0	0.236929	0.751252	0.430693	FALSE	0
L1Md_A_dup16253:L1Md_A:L1:LINE	chr18:29713092-29718306	0.525761	0	0	0.485921	0	0	0	0	0	0.242265	FALSE	0
L1Md_A_dup16325:L1Md_A:L1:LINE	chr18:47284390-47285954	0	0	0.330082	0.347086	0.16991	0	0	0	0.691152	1.07673	FALSE	0
L1Md_A_dup16433:L1Md_A:L1:LINE	chr18:64048663-64054938	0	0	0	0	0	0	0	0.325777	0.300501	0.48453	FALSE	0
L1Md_A_dup16597:L1Md_A:L1:LINE	chr19:9528176-9531911	0	0	0.264065	0	0	0	0	0.236929	0.781302	0.269183	FALSE	0
L1Md_A_dup16633:L1Md_A:L1:LINE	chr19:15308312-15313546	0	0	0	0.624756	0	0	0	0	0.240401	0.376857	FALSE	0
L1Md_A_dup1689:L1Md_A:L1:LINE	chr2:87380987-87381883	0	0.285198	0.198049	0	0	0	0	0.236929	0.901502	0.134592	FALSE	0
L1Md_A_dup1776:L1Md_A:L1:LINE	chr2:96373214-96379131	0	0.142599	0	0	0	0	0	0.473858	0.601001	0.48453	FALSE	0
L1Md_A_dup177:L1Md_A:L1:LINE	chr1:22230821-22237017	0	0	0.396098	0	0.594685	0	0	0.0592322	0	0.296102	FALSE	0
L1Md_A_dup1889:L1Md_A:L1:LINE	chr2:110104597-110109813	0.105152	0	0.198049	0	0	0	0	0	0.811352	0.080755	FALSE	0
L1Md_A_dup2166:L1Md_A:L1:LINE	chr3:44559543-44565611	0.68349	0	0	0	0.254865	0	0	0	0	0.269183	FALSE	0
L1Md_A_dup2185:L1Md_A:L1:LINE	chr3:3839443-3845636	0.525761	0	0	0	0.16991	0	0	0.207313	0.300501	0.188428	FALSE	0
L1Md_A_dup2237:L1Md_A:L1:LINE	chr3:11050472-11054950	0.578338	0	0.198049	0.208252	0	0	0	0.0296161	0.21035	0.188428	FALSE	0
L1Md_A_dup2248:L1Md_A:L1:LINE	chr3:11933238-11938640	0	0.427797	0.198049	0.138835	0	0	0	0	0.661101	0	FALSE	0
L1Md_A_dup2286:L1Md_A:L1:LINE	chr3:15516678-15520917	0	0	0	0.971842	0	0	0	0	0.330551	0	FALSE	0
L1Md_A_dup2367:L1Md_A:L1:LINE	chr3:22514908-22521092	0	0	0.0660164	0.833008	0	0	0	0.177697	0.661101	0.32302	FALSE	0
L1Md_A_dup2368:L1Md_A:L1:LINE	chr3:22612004-22618199	0.788642	0	0.198049	0	0	0	0	0.0888483	0.450751	0	FALSE	0
L1Md_A_dup2380:L1Md_A:L1:LINE	chr3:23302042-23307722	0	0	0.264065	0.347086	0	0	0	0.118464	0.691152	0	FALSE	0
L1Md_A_dup2532:L1Md_A:L1:LINE	chr3:44400703-44405341	0	0.142599	0.462115	0.277669	0.50973	0	0	0.177697	0.1803	0.080755	FALSE	0
L1Md_A_dup2555:L1Md_A:L1:LINE	chr3:45585572-45590977	0	0	0.594147	0	0	0	0	0	0.360601	0.32302	FALSE	0
L1Md_A_dup2563:L1Md_A:L1:LINE	chr3:45987625-45991288	0	0	0.330082	0.277669	0.594685	0	0	0	0.1202	0	FALSE	0
L1Md_A_dup274:L1Md_A:L1:LINE	chr1:30958947-30962926	0	0.427797	0	0.277669	0	0	0	0	0.721202	0.16151	FALSE	0
L1Md_A_dup2759:L1Md_A:L1:LINE	chr3:70057101-70059056	0	0	0	0	0	0	0	0.207313	0.480801	0.349938	FALSE	0
L1Md_A_dup3029:L1Md_A:L1:LINE	chr3:111256095-111262134	0.262881	0.285198	0	0	0	0	0	0	0.570951	0.107673	FALSE	0
L1Md_A_dup3155:L1Md_A:L1:LINE	chr3:133063379-133068568	0	0	0	0	0.50973	0	0	0.325777	0	0.269183	FALSE	0
L1Md_A_dup3355:L1Md_A:L1:LINE	chr4:5350676-5356481	0	0.213898	0	0	0	0	0	0.444242	0.0901502	0.269183	FALSE	0
L1Md_A_dup3395:L1Md_A:L1:LINE	chr4:10672670-10678997	0	0	0	0.416504	0	0	0	0	0.540901	0.780632	FALSE	0
L1Md_A_dup3411:L1Md_A:L1:LINE	chr4:13378278-13379390	0.157728	0	0.198049	0	0.084955	0	0	0.266545	0.21035	0.430693	FALSE	0
L1Md_A_dup3448:L1Md_A:L1:LINE	chr4:16324963-16325983	0	0	0.132033	0	0.084955	0	0	1.27349	0.240401	1.04982	FALSE	0
L1Md_A_dup36:L1Md_A:L1:LINE	chr1:3896204-3897773	0	0	0	0	0.424775	0	0	0.177697	0.420701	0.080755	FALSE	0
L1Md_A_dup3739:L1Md_A:L1:LINE	chr4:50624923-50631150	0	0	0	0	0	0	0	0.385009	0.570951	0.080755	FALSE	0
L1Md_A_dup4313:L1Md_A:L1:LINE	chr5:7893214-7899396	0	0	0.264065	0	0	0	0	0	0.240401	0.511448	FALSE	0
L1Md_A_dup4378:L1Md_A:L1:LINE	chr5:15458280-15459754	0.210305	0	0.264065	0	0	0	0	0.266545	0.480801	0.215347	FALSE	0
L1Md_A_dup4407:L1Md_A:L1:LINE	chr5:20769923-20770856	0.157728	0.285198	0	0	0.084955	0	0	0.325777	0.1202	0.296102	FALSE	0
L1Md_A_dup4534:L1Md_A:L1:LINE	chr5:47895596-47897887	0.105152	0	0	0	0.424775	0	0	0.207313	0.21035	0.296102	FALSE	0
L1Md_A_dup4667:L1Md_A:L1:LINE	chr5:62955105-62960283	0.315457	0	0.264065	0.208252	0	0	0	0.207313	0.661101	0	FALSE	0
L1Md_A_dup4824:L1Md_A:L1:LINE	chr5:85355052-85358503	0.157728	0.142599	0.198049	0	0	0	0	0	0.390651	0.215347	FALSE	0
L1Md_A_dup4931:L1Md_A:L1:LINE	chr5:94408456-94413511	0	0	0.924229	0	0.50973	0	0	0	0.21035	0.834468	FALSE	0
L1Md_A_dup5260:L1Md_A:L1:LINE	chr6:26247595-26252804	0	0	0.396098	0	0.424775	0	0	0	0.420701	0	FALSE	0
L1Md_A_dup5348:L1Md_A:L1:LINE	chr6:42091539-42097528	0.368033	0	0	0	0	0	0	0.266545	0.601001	0.242265	FALSE	0
L1Md_A_dup5423:L1Md_A:L1:LINE	chr6:56391971-56395634	0	0	0	0	0.33982	0	0	0	0.691152	0	FALSE	0
L1Md_A_dup5579:L1Md_A:L1:LINE	chr6:74128512-74129353	0.315457	0	0.330082	0	0.16991	0	0	0	0.1202	0.107673	FALSE	0
L1Md_A_dup5745:L1Md_A:L1:LINE	chr6:102086111-102087106	0	0	0	0	0	0	0	0.473858	0.631051	0	FALSE	0
L1Md_A_dup6012:L1Md_A:L1:LINE	chr7:5187940-5194296	0.210305	0	0	0	0	0	0	0.266545	0.781302	0.457612	FALSE	0
L1Md_A_dup6019:L1Md_A:L1:LINE	chr7:5553345-5559909	0	0	0	0.347086	0	0	0	0.148081	0.570951	0	FALSE	0
L1Md_A_dup6101:L1Md_A:L1:LINE	chr7:13142014-13148393	0	0.499096	0.72618	0	0.084955	0	0	0	0.420701	0	FALSE	0
L1Md_A_dup6395:L1Md_A:L1:LINE	chr7:59060132-59061806	0.105152	0	0	0.208252	0.084955	0	0	0.592322	0.631051	0.592203	FALSE	0
L1Md_A_dup6635:L1Md_A:L1:LINE	chr7:105257188-105263731	0	0	0	0.694173	0	0	0	0.414626	0.240401	0	FALSE	0
L1Md_A_dup6768:L1Md_A:L1:LINE	chr8:6302274-6308451	0.210305	0	0.462115	0	0	0	0	0.148081	0.390651	0.215347	FALSE	0
L1Md_A_dup686:L1Md_A:L1:LINE	chr1:94955066-94960460	0	0.499096	0	0	0	0	0	0.355393	0.270451	0.457612	FALSE	0
L1Md_A_dup7115:L1Md_A:L1:LINE	chr8:58403001-58407526	0	0	0	0.485921	0.084955	0	0	0.266545	0.540901	0	FALSE	0
L1Md_A_dup7224:L1Md_A:L1:LINE	chr8:72850143-72851065	0	0	0	0	0	0	0	0.858867	0.751252	0.888305	FALSE	0
L1Md_A_dup7627:L1Md_A:L1:LINE	chr9:35946511-35952308	0.420609	0	0	0.347086	0	0	0	0.266545	0.270451	0	FALSE	0
L1Md_A_dup7762:L1Md_A:L1:LINE	chr9:77129366-77132985	0.157728	0.142599	0	0.555338	0.084955	0	0	0	0.15025	0.619122	FALSE	0
L1Md_A_dup784:L1Md_A:L1:LINE	chr1:102243878-102249533	0	0	0.462115	0	0	0	0	0	0.480801	0.48453	FALSE	0
L1Md_A_dup790:L1Md_A:L1:LINE	chr1:102520950-102527138	0	0.356497	0	0	0	0	0	0.385009	0.991652	0.0269183	FALSE	0
L1Md_A_dup841:L1Md_A:L1:LINE	chr1:109405247-109411503	0	0.213898	0	0	0.594685	0	0	0.236929	0.901502	0	FALSE	0
L1Md_A_dup8497:L1Md_A:L1:LINE	chrX:46310120-46313782	0	0	0	0	0	0	0	0.414626	0.751252	0.296102	FALSE	0
L1Md_A_dup8699:L1Md_A:L1:LINE	chrX:62065553-62072543	0.262881	0	0.198049	0.485921	0.254865	0	0	0.266545	0.270451	0.242265	FALSE	0
L1Md_A_dup8700:L1Md_A:L1:LINE	chrX:62107398-62112810	0	0.427797	0	0.277669	0	0	0	0.0296161	0.510851	0	FALSE	0
L1Md_A_dup8817:L1Md_A:L1:LINE	chrX:68432266-68432900	0.262881	0	0	0	0	0	0	0	0.781302	0.0269183	FALSE	0
L1Md_A_dup9092:L1Md_A:L1:LINE	chrX:92577498-92578492	0	0	0.0660164	0	0.16991	0	0	0.296161	0.540901	0.242265	FALSE	0
L1Md_A_dup9238:L1Md_A:L1:LINE	chrX:108400191-108405010	0	0	0.330082	0.277669	0	0	0	0.414626	0.300501	0	FALSE	0
L1Md_A_dup9372:L1Md_A:L1:LINE	chrX:118390395-118396800	0	0	0	0.624756	0	0	0	0.503474	0.21035	0.215347	FALSE	0
L1Md_A_dup9378:L1Md_A:L1:LINE	chrX:118901138-118903549	0.420609	0.356497	0	0	0.084955	0	0	0.0592322	0	0.080755	FALSE	0
L1Md_A_dup9422:L1Md_A:L1:LINE	chrX:122862403-122867613	0.210305	0.213898	0.396098	0	0.254865	0	0	0	0.360601	0.215347	FALSE	0
L1Md_A_dup9590:L1Md_A:L1:LINE	chrX:144000001-144004492	0	0.285198	0.660164	0	0	0	0	0.207313	0.0300501	0.699877	FALSE	0
L1Md_F2_dup10531:L1Md_F2:L1:LINE	chr3:57355214-57360384	0	0.0712994	0.330082	0.277669	0	0	0	0.473858	0.240401	0.242265	FALSE	0
L1Md_F2_dup10534:L1Md_F2:L1:LINE	chr3:57414616-57415597	0	0.285198	0.462115	0	0.084955	0	0	0.118464	0.631051	0.269183	FALSE	0
L1Md_F2_dup10905:L1Md_F2:L1:LINE	chr3:69944325-69950728	0.420609	0	0	0.624756	0	0	0	0.296161	0	0	FALSE	0
L1Md_F2_dup11595:L1Md_F2:L1:LINE	chr3:90920815-90925944	0.473185	0	0	0	0	0	0	0.355393	0.240401	0.215347	FALSE	0
L1Md_F2_dup14164:L1Md_F2:L1:LINE	chr4:25637684-25638741	0	0	0	0	0	0	0	0.503474	0.1202	0.538367	FALSE	0
L1Md_F2_dup1443:L1Md_F2:L1:LINE	chr1:49301741-49302320	0.0525761	0	0	0	0	0	0	0.562706	0.540901	0.457612	FALSE	0
L1Md_F2_dup14740:L1Md_F2:L1:LINE	chr4:46237953-46240836	0	0.356497	0	0	0	0	0	0	0.360601	0.565285	FALSE	0
L1Md_F2_dup15018:L1Md_F2:L1:LINE	chr4:60274244-60280273	0	1.28339	0.462115	0	0	0	0	0.444242	1.05175	0.403775	FALSE	0
L1Md_F2_dup15188:L1Md_F2:L1:LINE	chr4:66507729-66512934	0.315457	0	0.0660164	0	0.084955	0	0	0	0.601001	0	FALSE	0
L1Md_F2_dup15301:L1Md_F2:L1:LINE	chr4:68701437-68703695	0	0.285198	0	0	0	0	0	0.355393	0.390651	0.0269183	FALSE	0
L1Md_F2_dup1603:L1Md_F2:L1:LINE	chr1:54466492-54466926	0	0	0.132033	0	0.254865	0	0	0.236929	0.21035	0.48453	FALSE	0
L1Md_F2_dup16440:L1Md_F2:L1:LINE	chr4:109886588-109887584	0.262881	0	0	0	0	0	0	0.651555	0	0.538367	FALSE	0
L1Md_F2_dup16942:L1Md_F2:L1:LINE	chr4:147069445-147070449	0.210305	0	0	0	0	0	0	0	0	0.942142	FALSE	0
L1Md_F2_dup17060:L1Md_F2:L1:LINE	chr5:6032332-6037551	0	0.427797	0.132033	0	0	0	0	0	0.570951	0	FALSE	0
L1Md_F2_dup17201:L1Md_F2:L1:LINE	chr5:8808401-8808772	0.157728	0.0712994	0	0.208252	0.254865	0	0	0.296161	0.300501	0.242265	FALSE	0
L1Md_F2_dup17365:L1Md_F2:L1:LINE	chr5:14296066-14301604	0	0.213898	0	0	0	0	0	0.385009	0.240401	0.349938	FALSE	0
L1Md_F2_dup17549:L1Md_F2:L1:LINE	chr5:22477732-22478713	0	0	0	0	0	0	0	0.710787	0.601001	0.269183	FALSE	0
L1Md_F2_dup17641:L1Md_F2:L1:LINE	chr5:26961292-26962281	0	0	0	0.138835	0	0	0	0.651555	0.841402	0.349938	FALSE	0
L1Md_F2_dup17694:L1Md_F2:L1:LINE	chr5:30049769-30055014	0	0	0.264065	0	0	0	0	0	1.0818	0	FALSE	0
L1Md_F2_dup17716:L1Md_F2:L1:LINE	chr5:32521856-32527165	0	0	0.396098	0.416504	0.084955	0	0	0	0.0300501	0.349938	FALSE	0
L1Md_F2_dup19601:L1Md_F2:L1:LINE	chr5:94001256-94007725	0	0	0	0	0.33982	0	0	0.236929	0.300501	0.48453	FALSE	0
L1Md_F2_dup19700:L1Md_F2:L1:LINE	chr5:95667080-95673550	0	0	0	0	0	0	0	0.0888483	1.3823	0.457612	FALSE	0
L1Md_F2_dup19876:L1Md_F2:L1:LINE	chr5:107575605-107577851	0	0	0.198049	0	0	0	0	0	1.23205	0.349938	FALSE	0
L1Md_F2_dup20218:L1Md_F2:L1:LINE	chr6:89782769-89787960	0	0.570395	0.264065	0.485921	0	0	0	0	0	0.107673	FALSE	0
L1Md_F2_dup20355:L1Md_F2:L1:LINE	chr6:7613882-7619517	0	0.285198	0	0	0	0	0	0	2.58431	0.349938	FALSE	0
L1Md_F2_dup20372:L1Md_F2:L1:LINE	chr6:8272912-8273801	0	0	0	0	0	0	0	0.799635	0.390651	0.403775	FALSE	0
L1Md_F2_dup20897:L1Md_F2:L1:LINE	chr6:21820633-21821077	0.210305	0	0	0.347086	0	0	0	0.0888483	0.0901502	0.565285	FALSE	0
L1Md_F2_dup21436:L1Md_F2:L1:LINE	chr6:44557288-44559534	0.262881	0	0.330082	0.0694173	0	0	0	0.0888483	0.601001	0	FALSE	0
L1Md_F2_dup21601:L1Md_F2:L1:LINE	chr6:50130404-50131615	0	0	0	0	0	0	0	0.799635	0.480801	0.349938	FALSE	0
L1Md_F2_dup22040:L1Md_F2:L1:LINE	chr6:65824077-65824750	0	0	0.396098	0	0	0	0	0.296161	0.270451	0.188428	FALSE	0
L1Md_F2_dup22349:L1Md_F2:L1:LINE	chr6:75343382-75348547	0	0	0	0	0.84955	0	0	0	0.300501	0	FALSE	0
L1Md_F2_dup22723:L1Md_F2:L1:LINE	chr6:89542879-89544374	0	0	0.198049	0	0	0	0	0.414626	1.05175	0.888305	FALSE	0
L1Md_F2_dup2327:L1Md_F2:L1:LINE	chr1:94093741-94099735	0	0	0.264065	0	0.424775	0	0	0	0.390651	0	FALSE	0
L1Md_F2_dup23330:L1Md_F2:L1:LINE	chr6:118980736-118981300	0	0	0.132033	0	0	0	0	0.651555	0.1202	0.592203	FALSE	0
L1Md_F2_dup23785:L1Md_F2:L1:LINE	chr6:136573351-136573760	0.157728	0	0	0	0	0	0	0.562706	0.751252	0.403775	FALSE	0
L1Md_F2_dup23972:L1Md_F2:L1:LINE	chr6:149500001-149505012	0	0	0	0.694173	0	0	0	0	0.631051	0	FALSE	0
L1Md_F2_dup2425:L1Md_F2:L1:LINE	chr1:96160511-96161130	0	0	0	0	0.16991	0	0	0.770019	0.15025	0.0538367	FALSE	0
L1Md_F2_dup24381:L1Md_F2:L1:LINE	chr7:12700098-12704895	0.68349	0	0.132033	0	0	0	0	0	0	0.538367	FALSE	0
L1Md_F2_dup24559:L1Md_F2:L1:LINE	chr7:17688710-17693955	0.736066	0	0	0	0.33982	0	0	0	0.450751	0.242265	FALSE	0
L1Md_F2_dup24583:L1Md_F2:L1:LINE	chr7:18209189-18209712	0	0.356497	0	0	0	0	0	0.414626	0.240401	0.215347	FALSE	0
L1Md_F2_dup25840:L1Md_F2:L1:LINE	chr7:59927298-59927424	0	0	0	0	0	0	0	0.296161	0.721202	0.565285	FALSE	0
L1Md_F2_dup26838:L1Md_F2:L1:LINE	chr7:97503663-97504655	0.157728	0	0	0	0	0	0	0.473858	0.570951	0.457612	FALSE	0
L1Md_F2_dup27162:L1Md_F2:L1:LINE	chr7:112911204-112912093	0	0.213898	0	0	0	0	0	0.236929	1.2621	1.10365	FALSE	0
L1Md_F2_dup27174:L1Md_F2:L1:LINE	chr7:114259996-114263639	0.157728	0	0.264065	0	0.254865	0	0	0.0888483	0.450751	0	FALSE	0
L1Md_F2_dup27281:L1Md_F2:L1:LINE	chr7:123871617-123876905	0.210305	0	0.72618	0	0	0	0	0.503474	0.570951	0.242265	FALSE	0
L1Md_F2_dup27559:L1Md_F2:L1:LINE	chr8:4006478-4011504	0	0.285198	0.264065	0	0	0	0	0	0.510851	0	FALSE	0
L1Md_F2_dup27584:L1Md_F2:L1:LINE	chr8:4770890-4772801	0	0.427797	0	0.277669	0	0	0	0.207313	0	0.296102	FALSE	0
L1Md_F2_dup29104:L1Md_F2:L1:LINE	chr8:62823336-62824761	0	0	0.0660164	0	0.084955	0	0	0.148081	0.480801	0.376857	FALSE	0
L1Md_F2_dup29272:L1Md_F2:L1:LINE	chr8:67391521-67391754	0	0.0712994	0.0660164	0	0	0	0	0.414626	0.601001	0.134592	FALSE	0
L1Md_F2_dup29668:L1Md_F2:L1:LINE	chr8:85817068-85818882	0.157728	0	0	0.347086	0	0	0	0.296161	1.41235	1.04982	FALSE	0
L1Md_F2_dup29739:L1Md_F2:L1:LINE	chr8:93994763-93995746	0	0	0	0	0	0	0	0.503474	0.390651	0.592203	FALSE	0
L1Md_F2_dup29743:L1Md_F2:L1:LINE	chr8:94462611-94467619	0	0	0	0.208252	0	0	0	0	0.931552	0.457612	FALSE	0
L1Md_F2_dup30082:L1Md_F2:L1:LINE	chr8:106830549-106830918	0	0	0.0660164	0	0	0	0	0.503474	0.751252	0.672958	FALSE	0
L1Md_F2_dup30083:L1Md_F2:L1:LINE	chr8:106830920-106831887	0	0	0	0	0	0	0	0.9181	0.961602	0.403775	FALSE	0
L1Md_F2_dup30183:L1Md_F2:L1:LINE	chr8:119087574-119087719	0	0	0	0	0.254865	0	0	0.236929	0.330551	0.349938	FALSE	0
L1Md_F2_dup30477:L1Md_F2:L1:LINE	chr9:9326737-9330936	0	0.0712994	0	0.833008	0	0	0	0	0.631051	0.538367	FALSE	0
L1Md_F2_dup30756:L1Md_F2:L1:LINE	chr9:18488909-18494153	0.473185	0	0	0.624756	0	0	0	0.0888483	0.721202	0.242265	FALSE	0
L1Md_F2_dup31264:L1Md_F2:L1:LINE	chr9:40152295-40152921	0	0	0.198049	0	0	0	0	0.651555	0.0300501	0.269183	FALSE	0
L1Md_F2_dup31425:L1Md_F2:L1:LINE	chr9:56274371-56276656	0	0	0	0	0	0	0	0.355393	0.661101	0.269183	FALSE	0
L1Md_F2_dup31521:L1Md_F2:L1:LINE	chr9:72859409-72860337	0	0	0	0	0	0	0	0.681171	0.570951	0.753713	FALSE	0
L1Md_F2_dup31846:L1Md_F2:L1:LINE	chr9:87068711-87074203	0	0.0712994	0	0.694173	0	0	0	0	0.390651	0	FALSE	0
L1Md_F2_dup32469:L1Md_F2:L1:LINE	chrX:148111117-148116342	0	0	0	0.416504	0.67964	0	0	0	0	0.619122	FALSE	0
L1Md_F2_dup32631:L1Md_F2:L1:LINE	chrX:6865526-6866101	0	0.142599	0.330082	0	0.084955	0	0	0.355393	0.751252	0.726795	FALSE	0
L1Md_F2_dup32847:L1Md_F2:L1:LINE	chrX:14578579-14579573	0.105152	0.427797	0.198049	0	0	0	0	0.710787	0.450751	0	FALSE	0
L1Md_F2_dup33007:L1Md_F2:L1:LINE	chrX:17614262-17620443	0	0	0	0.833008	0	0	0	0	0.631051	0.430693	FALSE	0
L1Md_F2_dup33027:L1Md_F2:L1:LINE	chrX:18232335-18232928	0	0	0	0.208252	0.254865	0	0	0	0.570951	0.134592	FALSE	0
L1Md_F2_dup33159:L1Md_F2:L1:LINE	chrX:21474609-21474973	0	0.142599	0.396098	0	0.33982	0	0	0.0888483	0.21035	0	FALSE	0
L1Md_F2_dup34607:L1Md_F2:L1:LINE	chrX:47968009-47969901	0	0	0	0	0	0	0	0.651555	0.420701	0.888305	FALSE	0
L1Md_F2_dup34786:L1Md_F2:L1:LINE	chrX:52734428-52735587	0	0	0	0	0	0	0	1.03656	0.871452	0.134592	FALSE	0
L1Md_F2_dup36233:L1Md_F2:L1:LINE	chrX:82040111-82045708	0	0	0	0	0	0	0	0.799635	0.631051	0	FALSE	0
L1Md_F2_dup36634:L1Md_F2:L1:LINE	chrX:89320390-89321386	0	0	0.198049	0	0.424775	0	0	0.385009	0.240401	0.403775	FALSE	0
L1Md_F2_dup36916:L1Md_F2:L1:LINE	chrX:95226010-95227203	0.105152	0	0	0	0	0	0	0.0888483	0.300501	0.565285	FALSE	0
L1Md_F2_dup37016:L1Md_F2:L1:LINE	chrX:97202072-97206093	0	0	0.660164	0	0	0	0	0	0.300501	0.107673	FALSE	0
L1Md_F2_dup37185:L1Md_F2:L1:LINE	chrX:102962231-102965878	0	0	0	0.694173	0	0	0	0	0.510851	0.134592	FALSE	0
L1Md_F2_dup3821:L1Md_F2:L1:LINE	chr1:132699200-132700699	0	0	0	0	0	0	0	0.355393	0.390651	0.753713	FALSE	0
L1Md_F2_dup38244:L1Md_F2:L1:LINE	chrX:121373945-121380104	0	0	0.462115	0.347086	0	0	0	0	0	0.32302	FALSE	0
L1Md_F2_dup39245:L1Md_F2:L1:LINE	chrX:145140206-145142253	0	0	0	0	0	0	0	0.681171	0.631051	0.080755	FALSE	0
L1Md_F2_dup40044:L1Md_F2:L1:LINE	chrX:164241330-164243359	0	0	0	0.76359	0	0	0	0	0.21035	0.457612	FALSE	0
L1Md_F2_dup40056:L1Md_F2:L1:LINE	chrX:164645418-164646417	0	0	0	0	0	0	0	0.592322	0.661101	0	FALSE	0
L1Md_F2_dup42411:L1Md_F2:L1:LINE	chr10:20973631-20975301	0	0	0.396098	0.0694173	0	0	0	0	0.480801	0.48453	FALSE	0
L1Md_F2_dup42424:L1Md_F2:L1:LINE	chr10:22289560-22290472	0.157728	0	0	0.347086	0	0	0	0.266545	0.240401	0.134592	FALSE	0
L1Md_F2_dup44714:L1Md_F2:L1:LINE	chr10:123651401-123651892	0	0	0	0	0	0	0	0.325777	0.420701	0.64604	FALSE	0
L1Md_F2_dup4495:L1Md_F2:L1:LINE	chr1:154426723-154427201	0	0	0	0	0.16991	0	0	0	0.270451	0.565285	FALSE	0
L1Md_F2_dup4530:L1Md_F2:L1:LINE	chr1:157202427-157203308	0	0	0	0.0694173	0	0	0	0.385009	0.570951	0.242265	FALSE	0
L1Md_F2_dup4534:L1Md_F2:L1:LINE	chr1:157252096-157253188	0	0	0	0	0	0	0	0.562706	0.300501	0.48453	FALSE	0
L1Md_F2_dup45469:L1Md_F2:L1:LINE	chr11:28969042-28975216	0.473185	0.712994	0	0	0	0	0	0	0.480801	0.403775	FALSE	0
L1Md_F2_dup45499:L1Md_F2:L1:LINE	chr11:30071961-30074067	0	0.499096	0	0	0.254865	0	0	0.0592322	0.570951	0	FALSE	0
L1Md_F2_dup45528:L1Md_F2:L1:LINE	chr11:31011569-31017759	0.68349	0	0	0	0	0	0	0	0.631051	0	FALSE	0
L1Md_F2_dup45559:L1Md_F2:L1:LINE	chr11:33407874-33409148	0.105152	0.142599	0	0	0	0	0	0.207313	0.811352	0.64604	FALSE	0
L1Md_F2_dup45595:L1Md_F2:L1:LINE	chr11:37502762-37503697	0	0	0.198049	0	0	0	0	0.266545	0.781302	0.296102	FALSE	0
L1Md_F2_dup4599:L1Md_F2:L1:LINE	chr1:160698161-160700269	0	0	0	0	0	0	0	0.592322	0.631051	0.592203	FALSE	0
L1Md_F2_dup46267:L1Md_F2:L1:LINE	chr11:87169595-87170577	0.157728	0	0	0.347086	0.084955	0	0	0.355393	0.781302	0.942142	FALSE	0
L1Md_F2_dup46870:L1Md_F2:L1:LINE	chr12:12309160-12309798	0.157728	0	0	0	0	0	0	0.355393	0.390651	0.242265	FALSE	0
L1Md_F2_dup4697:L1Md_F2:L1:LINE	chr1:167512609-167515306	0	0.0712994	0	0	0	0	0	0.177697	0.420701	0.403775	FALSE	0
L1Md_F2_dup47034:L1Md_F2:L1:LINE	chr12:24333005-24335848	0	0	0	0	0	0	0	1.74735	0.240401	0	FALSE	0
L1Md_F2_dup4763:L1Md_F2:L1:LINE	chr1:172672275-172677697	0.420609	0	0	0.485921	0	0	0	0	0.240401	0	FALSE	0
L1Md_F2_dup47650:L1Md_F2:L1:LINE	chr12:46584821-46585355	0	0	0.330082	0	0	0	0	0.236929	0.1202	0.376857	FALSE	0
L1Md_F2_dup4800:L1Md_F2:L1:LINE	chr1:174401056-174406101	0	0	0.396098	0.76359	0.084955	0	0	0.118464	0.751252	0	FALSE	0
L1Md_F2_dup48550:L1Md_F2:L1:LINE	chr12:78293071-78294033	0	0	0	0	0	0	0	0.266545	0.360601	0.538367	FALSE	0
L1Md_F2_dup48557:L1Md_F2:L1:LINE	chr12:78337240-78338398	0	0.285198	0	0.347086	0	0	0	0	0.540901	0.080755	FALSE	0
L1Md_F2_dup48590:L1Md_F2:L1:LINE	chr12:81388977-81391365	0	0.142599	0.528131	0	0.16991	0	0	0	0.721202	0.699877	FALSE	0
L1Md_F2_dup48605:L1Md_F2:L1:LINE	chr12:82242490-82243299	0	0.213898	0	0	0	0	0	0.355393	0.270451	0.457612	FALSE	0
L1Md_F2_dup49024:L1Md_F2:L1:LINE	chr12:99520572-99522095	0	0.142599	0	0	0	0	0	0	0.811352	0.511448	FALSE	0
L1Md_F2_dup49104:L1Md_F2:L1:LINE	chr12:102843210-102844300	0	0.0712994	0	0	0	0	0	0.473858	0.1202	0.349938	FALSE	0
L1Md_F2_dup49492:L1Md_F2:L1:LINE	chr13:4017494-4022165	0	0	0	0	0	0	0	0.266545	0.601001	0.32302	FALSE	0
[truncated: 4,163 more rows]

## Sheet: Legend
Column	Column Header	Description
A	Transposable.Element	Name of transposable element,
B	Location	Chromosomal location (Chr:Start-End)
C	dko13_total	Input total RNA from safb/2 dko clone 13
D	dko4_total	Input total RNA from safb/2 dko clone 4
E	wt20_total	Input total RNA from WT clone 20
F	wt44_total	Input total RNA from WT clone 44
G	wtrmce_total	Input total RNA from Parental RMCE line
H	dko13_rip	SAFB RNA-IP in safb/2 dko clone 13
I	dko4_rip	SAFB RNA-IP in safb/2 dko clone 4
J	wt20_rip	SAFB RNA-IP in WT clone 20
K	wt44_rip	SAFB RNA-IP in WT clone 44
L	wtrmce_rip	SAFB RNA-IP in Parental RMCE line
M	Overlaps.genes	Does transposable element overlap a gene? TRUE = yes, FALSE = no
N	gt2_wt_vdko	Average DKO RIP signal over average DKO RIP signal plus average WT RIP signal: average((col H+I))/(average((col H+I)) + average((col J+K+L)))
