# Supplementary material
Source: HighWire-hosted journal article supplement (doi:10.1101/rna.079569.122)
Supplement: Supplemental_Table_S3.xlsx [file Supplemental_Table_S3.xlsx]

## Sheet: sig_genes
Gene_Identifier	baseMean	log2FoldChange	lfcSE	stat	pvalue	padj	rmce_input_aligned.bam	wt20_input_aligned.bam	wt44_input_aligned.bam	dko4_input_aligned.bam	dko13_input_aligned.bam
Safb	461.067	-5.54209	0.282757	-19.6002	1.54052e-85	2.33481e-81	694	837	554	17	21
Prtg	835.948	-1.2247	0.122265	-10.0167	1.28698e-23	9.75277e-20	879	1116	992	488	590
Upp1	847.898	1.40146	0.163462	8.5736	1.00296e-17	5.06694e-14	351	613	462	1135	2105
Pnma5	133.39	1.90748	0.235909	8.08566	6.18267e-16	2.34261e-12	53	60	62	191	382
Pecam1	809.433	1.17985	0.147597	7.99372	1.30928e-15	3.96868e-12	419	584	484	1019	1898
Pfkp	1671.42	1.15459	0.144973	7.96416	1.66346e-15	4.20191e-12	818	1371	933	2245	3684
Thbs1	223.573	-1.70246	0.220229	-7.73043	1.07181e-14	2.32062e-11	329	264	245	106	113
Ntn1	280.531	-1.679	0.218484	-7.68479	1.5325e-14	2.90331e-11	402	380	272	144	132
Sema6a	274.295	-1.38057	0.183449	-7.52567	5.24526e-14	8.83302e-11	302	332	363	162	159
Plagl1	195.632	-1.8769	0.250137	-7.50347	6.21511e-14	9.41962e-11	152	297	320	87	86
Lrp2	1425.84	-1.05934	0.14161	-7.4807	7.393e-14	1.01862e-10	1693	1632	1589	966	1020
Cdk6	464.837	-1.24167	0.167708	-7.40377	1.32369e-13	1.67182e-10	437	577	652	286	303
Cd24a	427.42	-1.19089	0.161721	-7.36383	1.78705e-13	2.08342e-10	459	552	504	283	270
Adgre5	345.129	1.12213	0.15474	7.25172	4.11515e-13	4.45495e-10	188	233	226	462	749
Adgrl2	967.958	-0.897804	0.124481	-7.2124	5.49758e-13	5.55476e-10	967	1263	1047	688	788
Fgf5	98.5951	-1.97638	0.277439	-7.12364	1.0511e-12	9.95658e-10	98	143	147	44	38
Spred1	499.812	-1.10064	0.1549	-7.10549	1.19895e-12	1.00951e-09	460	626	668	318	369
Acsl3	441.263	-1.05181	0.147912	-7.11103	1.15179e-12	1.00951e-09	462	592	482	240	396
Enpp2	83.2577	-2.14245	0.305722	-7.00785	2.42008e-12	1.93046e-09	88	105	138	32	31
Ppfia4	237.371	1.38417	0.199545	6.93661	4.01616e-12	3.04344e-09	128	151	119	298	610
Gm37899	821.966	-0.95032	0.141909	-6.69669	2.13197e-11	1.46873e-08	755	997	1057	575	643
Ndrg1	138.195	1.65233	0.246576	6.70109	2.06869e-11	1.46873e-08	58	92	57	180	386
Notch4	128.914	1.42854	0.214825	6.64981	2.93468e-11	1.93383e-08	57	88	68	203	283
Ccnd1	646.74	-1.05673	0.161366	-6.54865	5.80601e-11	3.66649e-08	670	768	802	468	426
Kctd12b	95.44	-1.82956	0.279866	-6.53727	6.2652e-11	3.78753e-08	87	139	145	44	43
Gja1	911.306	-0.881673	0.134981	-6.53182	6.49747e-11	3.78753e-08	813	1111	1156	631	777
Fndc3c1	166.066	-1.29862	0.202835	-6.40237	1.52982e-10	8.58737e-08	163	247	194	86	122
Prrc1	451.188	1.16094	0.182279	6.36901	1.90255e-10	1.02982e-07	235	274	322	532	1096
Safb2	336.842	-5.21447	0.820383	-6.35614	2.06884e-10	1.08122e-07	523	606	387	4	34
Colec12	125.181	-1.41759	0.223357	-6.34675	2.19906e-10	1.11097e-07	132	178	151	64	82
Cdyl2	365.676	0.962106	0.152921	6.29153	3.1436e-10	1.53692e-07	215	292	226	473	750
Hk1	343.759	1.11554	0.180201	6.19055	5.99529e-10	2.83952e-07	205	258	184	416	803
Lpp	670.1	-0.77688	0.127094	-6.11265	9.79901e-10	4.50042e-07	641	844	733	492	599
Dstn	1229.97	-0.684914	0.113552	-6.03171	1.62237e-09	7.23196e-07	1125	1553	1328	882	1233
Zfp710	1195.3	0.66948	0.111386	6.01046	1.84999e-09	8.011e-07	756	1013	901	1504	2105
Fstl1	763.761	-0.817091	0.137492	-5.94282	2.80153e-09	1.17944e-06	851	863	811	563	650
Dusp6	297.908	-0.994709	0.168058	-5.91886	3.24181e-09	1.32791e-06	304	350	367	207	224
Tmem47	206.07	-1.38862	0.23716	-5.85522	4.76373e-09	1.89998e-06	158	309	296	126	113
Rbms1	532.36	-0.762064	0.130885	-5.82239	5.80132e-09	2.25448e-06	526	631	595	380	497
Dock6	1710.05	0.739351	0.128323	5.76162	8.33097e-09	3.15661e-06	1127	1552	1051	2252	3015
Rbm44	71.0489	2.00502	0.349229	5.74129	9.39564e-09	3.47318e-06	24	28	37	78	242
Sema3e	243.369	-1.01762	0.177904	-5.72004	1.06502e-08	3.8432e-06	257	325	258	168	180
Mep1b	132.653	1.29263	0.226545	5.70584	1.15773e-08	4.08059e-06	52	87	94	193	293
Fmnl2	481.881	-0.821831	0.146127	-5.62409	1.86483e-08	6.4235e-06	470	576	558	366	395
Ube2o	814.42	0.794711	0.141428	5.61918	1.91863e-08	6.46196e-06	487	650	602	932	1677
Lpar4	93.8537	-1.60493	0.287715	-5.57817	2.43056e-08	7.36753e-06	84	112	158	41	58
B830012L14Rik	934.49	-0.811635	0.145393	-5.58237	2.37261e-08	7.36753e-06	833	1102	1178	718	762
Rian	4626.68	-0.596094	0.106857	-5.57845	2.42674e-08	7.36753e-06	4093	5324	5343	3578	4688
Gpi1	1208.51	0.844131	0.151291	5.57952	2.41189e-08	7.36753e-06	746	1079	716	1409	2524
Rhox5	346.581	0.926545	0.166056	5.57972	2.4091e-08	7.36753e-06	232	212	252	449	694
Ccn1	448.244	-0.857118	0.153872	-5.57035	2.54231e-08	7.55514e-06	519	486	485	299	406
Grhl3	204.019	1.0111	0.182219	5.54883	2.87582e-08	8.38192e-06	113	167	122	276	414
Fat3	31.322	-2.71669	0.49074	-5.53591	3.09617e-08	8.77492e-06	41	43	46	6	11
Gnasas1	346.316	-0.889664	0.160757	-5.5342	3.12646e-08	8.77492e-06	313	425	435	212	329
Nid1	554.907	0.742796	0.134691	5.51482	3.49128e-08	9.44889e-06	386	432	383	681	1046
Rad50	1063.16	0.827429	0.150002	5.51613	3.46538e-08	9.44889e-06	615	768	854	1215	2232
Tpm1	1532.84	-0.771951	0.140075	-5.51097	3.56868e-08	9.48892e-06	1651	1969	1433	1193	1284
Ahnak	4732.49	-0.671695	0.122468	-5.48466	4.14268e-08	1.08252e-05	4937	5850	4504	3789	4270
Atrnl1	143.59	-1.13316	0.207231	-5.46813	4.54805e-08	1.16831e-05	160	180	164	82	114
Ezh1	353.635	0.965471	0.176908	5.45747	4.8297e-08	1.21998e-05	234	260	210	408	792
Zfp608	157.311	-1.23084	0.22609	-5.44403	5.20881e-08	1.29417e-05	163	179	217	104	95
Wls	58.172	-1.85112	0.340429	-5.43761	5.40004e-08	1.2991e-05	85	67	70	22	31
Tagln	335.172	-1.08652	0.199788	-5.43838	5.37662e-08	1.2991e-05	435	435	291	223	238
Amot	181.89	-1.02873	0.189865	-5.41821	6.01976e-08	1.42555e-05	172	245	215	113	149
Kcnq1ot1	4680.03	-0.719569	0.133936	-5.37246	7.76687e-08	1.78355e-05	4001	5496	5841	3714	4052
Cpt1a	249.335	1.02853	0.191427	5.37296	7.74529e-08	1.78355e-05	178	161	142	311	544
Mfge8	517.299	0.900209	0.167953	5.35988	8.32751e-08	1.88376e-05	343	447	271	650	1050
Tpm4	752.026	-0.686843	0.12869	-5.33719	9.43986e-08	2.10398e-05	697	933	816	593	682
Cyyr1	120.66	-1.26893	0.238286	-5.32522	1.0083e-07	2.21476e-05	145	132	152	72	79
Xlr3b	17.0986	3.93086	0.741106	5.30405	1.13264e-07	2.45232e-05	3	1	3	24	72
Gli3	348.686	-0.783829	0.148238	-5.28763	1.23912e-07	2.64509e-05	349	428	376	251	316
Adgrv1	305.079	-0.822262	0.156153	-5.26574	1.39626e-07	2.89887e-05	315	382	319	214	273
Irs2	436.715	-0.792047	0.150397	-5.26639	1.39134e-07	2.89887e-05	446	498	497	336	364
Akap1	1311.5	0.618483	0.117612	5.25866	1.4511e-07	2.97202e-05	902	1067	1003	1510	2419
Mme	594.957	-0.758168	0.144262	-5.25549	1.47629e-07	2.98329e-05	540	734	689	469	500
Tasor	1666.9	-0.772124	0.147096	-5.24912	1.52827e-07	3.04769e-05	1298	2149	2105	1218	1503
Ftx	151.996	-1.14899	0.219255	-5.24045	1.60182e-07	3.15288e-05	158	165	211	81	126
Grip1	86.6966	-1.55957	0.299398	-5.20902	1.89842e-07	3.68878e-05	104	125	94	55	35
Samd4	59.3588	-1.69361	0.32653	-5.1867	2.14052e-07	4.10656e-05	67	81	77	32	26
Vgll3	54.4211	-1.75496	0.338983	-5.17713	2.25325e-07	4.21998e-05	58	69	81	25	27
Zfp280c	301.624	-0.926368	0.178941	-5.17696	2.25533e-07	4.21998e-05	249	381	401	201	256
Serp1	413.74	-0.878085	0.170177	-5.15984	2.47159e-07	4.56823e-05	338	506	557	280	363
H2az1	473.429	-0.915765	0.178688	-5.12494	2.97628e-07	5.43476e-05	359	619	643	317	404
Uggt2	120.059	-1.13346	0.222741	-5.08871	3.60516e-07	6.50475e-05	119	162	143	69	95
Lama3	216.438	0.975159	0.191942	5.08048	3.76486e-07	6.6887e-05	120	163	149	253	483
Slc15a2	51.095	1.64867	0.324608	5.07894	3.79538e-07	6.6887e-05	19	26	31	87	115
Cul1	656.619	-0.729968	0.143811	-5.07587	3.85731e-07	6.71971e-05	609	841	706	532	550
Aire	138.057	1.30149	0.257617	5.05203	4.37138e-07	7.52871e-05	62	127	55	194	316
Slc5a5	122.018	-1.14503	0.227176	-5.0403	4.64812e-07	7.87753e-05	111	170	152	73	92
Atp1a3	195.269	0.957105	0.190007	5.03722	4.72345e-07	7.87753e-05	124	125	140	246	407
Ddx60	41.768	2.24156	0.445022	5.03696	4.72984e-07	7.87753e-05	11	22	14	41	158
Krt8	198.67	-1.00503	0.200134	-5.0218	5.11883e-07	8.43271e-05	216	285	186	112	181
Sulf1	545.774	-0.812397	0.162149	-5.01019	5.43754e-07	8.73087e-05	530	639	643	446	410
Gm2999	577.004	0.643094	0.128389	5.00896	5.47264e-07	8.73087e-05	375	475	448	757	957
Acp5	46.5677	1.75984	0.351325	5.00915	5.46722e-07	8.73087e-05	27	21	17	72	119
Tmx3	404.459	-0.776555	0.155334	-4.99927	5.75488e-07	9.08551e-05	348	491	503	273	393
Cnr1	99.9242	-1.25644	0.251688	-4.99204	5.9745e-07	9.33499e-05	99	123	136	61	65
Neto2	77.2009	-1.44345	0.289528	-4.98554	6.17894e-07	9.45939e-05	83	85	115	37	52
Spire2	130.227	1.05656	0.21192	4.98565	6.17552e-07	9.45939e-05	76	96	79	172	276
Mipol1	86.4988	-1.36066	0.273149	-4.98139	6.31278e-07	9.56765e-05	100	133	83	46	58
Nsd2	987.905	-0.566507	0.114028	-4.96815	6.75944e-07	0.000101432	962	1129	1031	747	1052
Marcks	381.826	-0.875633	0.176536	-4.96008	7.04624e-07	0.000104699	308	500	487	283	304
Lin28b	327.003	-0.778974	0.157128	-4.95756	7.13833e-07	0.000105037	299	386	397	233	301
Rnf217	69.1152	-1.52488	0.307874	-4.95293	7.31051e-07	0.000106537	78	100	79	42	32
Mt2	1335.27	0.59061	0.119329	4.94944	7.44269e-07	0.00010743	955	1158	945	1538	2419
Gm2a	275.381	0.950338	0.192158	4.94562	7.59028e-07	0.000108527	157	237	163	314	618
Cask	287.36	-0.798521	0.161748	-4.93683	7.94009e-07	0.000112467	283	355	315	216	245
Inpp5d	763.963	0.736973	0.149851	4.91805	8.7411e-07	0.000122667	500	667	500	846	1560
Vmn1r90	24.9908	-2.66794	0.542845	-4.91474	8.89011e-07	0.000123613	33	41	30	5	9
Ints6	657.149	-0.742298	0.151356	-4.90432	9.37498e-07	0.00012917	599	703	850	496	590
Gpi-ps	1021.7	0.752943	0.154089	4.88643	1.0268e-06	0.000140199	646	978	602	1218	1990
Thsd7a	43.1621	-1.90779	0.390605	-4.88418	1.03863e-06	0.000140548	50	56	61	22	15
Aldoa	4841.01	0.721614	0.147876	4.87987	1.06158e-06	0.000142383	3173	4721	2769	5969	8984
Col4a2	169.256	-0.975651	0.200209	-4.87317	1.09824e-06	0.000146008	185	222	172	117	131
Acp6	335.102	0.791942	0.162865	4.86258	1.15868e-06	0.000152704	203	304	212	415	647
Spta1	350.529	-0.956537	0.196978	-4.85606	1.19745e-06	0.000153988	365	415	412	286	219
Amotl2	533.657	-0.745536	0.153452	-4.85844	1.18314e-06	0.000153988	591	547	597	405	474
Hrob	368.947	0.712748	0.146782	4.85582	1.19891e-06	0.000153988	247	306	257	449	688
Lima1	1936.8	0.555608	0.11457	4.84952	1.2376e-06	0.000157622	1447	1670	1364	2268	3380
Sox4	494.217	-0.761238	0.157115	-4.84511	1.2654e-06	0.00015982	499	572	551	406	392
Qser1	1568.07	-0.634094	0.13093	-4.843	1.27896e-06	0.000160198	1354	1751	1935	1235	1501
Ucp2	437.262	0.677444	0.139954	4.84048	1.29524e-06	0.000160907	281	389	305	555	768
Col4a1	343.555	-0.927345	0.191819	-4.83449	1.33488e-06	0.000164483	406	442	313	263	246
Gm11410	3018.43	-0.576437	0.119758	-4.81333	1.48435e-06	0.000180402	2786	3177	3584	2424	2996
Pltp	204.218	0.857576	0.178184	4.81286	1.48788e-06	0.000180402	141	151	131	269	387
Anxa6	580.346	0.72815	0.151385	4.80991	1.51001e-06	0.000181633	416	489	360	674	1136
Ghr	36.0305	-2.40605	0.500499	-4.80731	1.52976e-06	0.00018256	32	35	79	13	10
Sytl3	87.2077	1.33955	0.278987	4.80149	1.57491e-06	0.000186479	38	44	67	116	211
Hmga2	189.356	-0.904646	0.188498	-4.79925	1.59263e-06	0.000187115	175	230	237	124	167
Cnpy1	325.071	-0.74299	0.154873	-4.7974	1.60738e-06	0.000187396	295	423	354	235	306
Nefl	132.931	-1.20682	0.252065	-4.78773	1.68675e-06	0.000195148	103	189	186	88	83
mt-Nd4	6725.14	-0.695723	0.145412	-4.7845	1.71414e-06	0.000196016	5221	7929	8850	5045	6370
Gm10136	464.334	0.689519	0.144136	4.7838	1.72012e-06	0.000196016	333	390	303	566	852
Rnd3	273.273	-0.835189	0.174798	-4.77802	1.7703e-06	0.000198746	277	298	333	205	224
Ttn	1954.81	-0.67596	0.141438	-4.77919	1.76001e-06	0.000198746	1725	2134	2469	1594	1718
Trim44	541.667	-0.646453	0.135379	-4.77512	1.79604e-06	0.000200152	516	608	616	424	516
Phldb2	149.047	-0.999575	0.209784	-4.76477	1.89066e-06	0.000208342	163	203	147	97	120
Zfp423	304.634	-0.851131	0.178655	-4.7641	1.89702e-06	0.000208342	296	353	369	242	228
Pkd2	418.314	-0.82626	0.17441	-4.73746	2.16413e-06	0.000235968	395	508	492	346	304
Mosmo	123.737	-1.07026	0.22604	-4.73483	2.1924e-06	0.000237055	111	162	160	77	97
Cxadr	226.293	-0.828221	0.174965	-4.73363	2.20538e-06	0.000237055	207	282	268	160	200
Arl4c	270.722	-0.830136	0.175528	-4.72937	2.25216e-06	0.000240379	284	370	252	177	257
Acta2	59.1452	-1.755	0.372958	-4.70562	2.531e-06	0.00026825	95	86	43	24	33
Gm14124	213.333	-1.09585	0.232968	-4.70387	2.55275e-06	0.000268677	157	258	337	123	175
Zfp950	87.8377	-1.35679	0.28861	-4.70112	2.58743e-06	0.000270449	74	110	138	38	70
mt-Cytb	11114.5	-0.642152	0.137026	-4.68633	2.78144e-06	0.000287001	8859	13011	14061	8820	10452
Map1a	626.413	0.630858	0.134621	4.68617	2.78366e-06	0.000287001	469	464	472	786	1076
Gm10033	338.731	-0.818646	0.174894	-4.68081	2.8575e-06	0.000292624	271	428	437	242	299
Slc16a2	67.3044	-1.52281	0.326385	-4.6657	3.07567e-06	0.000312852	92	96	62	23	53
Hjurp	1679.92	0.518962	0.111442	4.65681	3.21151e-06	0.000324491	1147	1475	1328	1898	2954
Tnfrsf19	91.1583	-1.1759	0.253323	-4.6419	3.45222e-06	0.000346502	88	118	118	50	72
Mks1	121.729	1.1667	0.251739	4.63455	3.5772e-06	0.000356685	68	66	89	141	299
Bmf	203.365	0.889701	0.192028	4.63318	3.60091e-06	0.000356702	138	171	109	269	392
Syt11	175.786	-0.897108	0.193754	-4.63014	3.65423e-06	0.000359634	177	198	217	119	151
Ephx1	83.5211	1.32965	0.287992	4.61696	3.8941e-06	0.000380768	51	51	41	96	221
Cep131	254.61	0.803408	0.17445	4.60539	4.11702e-06	0.000399985	179	184	175	302	511
Mgat5b	71.1757	1.25789	0.273441	4.60024	4.22011e-06	0.000407388	40	47	39	99	160
Zfp932	176.974	-0.947604	0.207828	-4.55956	5.12618e-06	0.000488667	146	223	238	118	147
Clmn	144.089	0.929821	0.203929	4.55954	5.12655e-06	0.000488667	90	118	84	197	276
Pip4p2	178.851	-0.951953	0.209037	-4.554	5.26354e-06	0.000497691	174	199	237	96	177
Ankrd37	56.1064	1.58021	0.347066	4.55307	5.2869e-06	0.000497691	12	43	33	89	132
Sun1	940.181	0.576549	0.126902	4.54326	5.53901e-06	0.000515138	687	810	665	1069	1706
Trim56	272.225	0.734885	0.161754	4.54322	5.54021e-06	0.000515138	160	228	207	342	501
Lamc2	267.651	-0.840796	0.18512	-4.54189	5.57518e-06	0.000515228	292	369	235	187	236
Actb	14515.2	-0.449133	0.098995	-4.53693	5.708e-06	0.000524306	13804	16180	14699	12512	15117
Pcdh1	236.817	-0.831533	0.183455	-4.53262	5.82565e-06	0.000531889	254	263	268	183	188
Slc27a2	214.011	-0.868747	0.191726	-4.53118	5.86553e-06	0.000532324	228	267	222	167	161
Pttg1	265.65	0.787216	0.173927	4.52613	6.00728e-06	0.000541942	178	196	192	305	542
Pdzd2	97.2511	-1.178	0.260738	-4.51794	6.24452e-06	0.000560012	116	131	96	65	62
Gm15772	797.525	0.600616	0.132979	4.51663	6.28324e-06	0.000560169	593	667	556	909	1466
Efna5	70.1759	-1.34793	0.298838	-4.51058	6.4652e-06	0.000573021	77	91	86	46	37
Nexmif	420.553	-0.754651	0.167676	-4.50065	6.7747e-06	0.000596961	371	506	509	346	336
Ppp1r9b	275.933	0.759289	0.168807	4.49796	6.86074e-06	0.000601048	197	188	206	342	520
Car2	268.934	-0.849611	0.189046	-4.49419	6.98355e-06	0.000602329	244	292	363	201	218
Acsl4	323.937	-0.75514	0.168038	-4.49385	6.99458e-06	0.000602329	274	419	381	205	339
D16Ertd472e	328.061	-0.694871	0.154548	-4.49614	6.91978e-06	0.000602329	290	412	369	243	316
Tubb2b	926.456	0.515735	0.114869	4.48978	7.1296e-06	0.000610487	670	810	696	1113	1536
Igf2bp3	541.483	-0.769738	0.171651	-4.48432	7.31455e-06	0.000622805	524	735	534	457	409
Gm43776	29.523	-2.08354	0.465898	-4.4721	7.74552e-06	0.000654464	32	43	42	13	10
Syncrip	1526.54	-0.668928	0.149682	-4.46899	7.8591e-06	0.000654464	1192	1770	2001	1117	1524
C1qbp	1236.8	0.534118	0.119471	4.47068	7.79707e-06	0.000654464	839	1073	981	1376	2225
St6galnac2	97.8511	1.09245	0.244414	4.46967	7.83409e-06	0.000654464	61	54	69	138	199
Sox15	97.0164	1.15452	0.258718	4.46248	8.10147e-06	0.000670961	59	61	59	113	236
Fam49a	90.9027	-1.15576	0.259066	-4.46126	8.14804e-06	0.00067115	108	99	111	53	69
Col9a2	130.818	0.963702	0.216389	4.45357	8.44538e-06	0.000691882	84	79	96	190	240
Fst	47.389	-1.89475	0.426059	-4.44716	8.70136e-06	0.000709021	31	58	97	19	23
Sall2	160.71	-1.08931	0.245204	-4.44247	8.89326e-06	0.000720782	204	137	210	98	125
Pold2	314.041	0.702762	0.15834	4.43831	9.06699e-06	0.000730953	205	278	211	378	588
Gm5452	187.333	0.90826	0.20491	4.43248	9.31572e-06	0.000747032	119	170	95	255	356
Zfp125	156.915	-1.098	0.248036	-4.42676	9.56589e-06	0.000761384	116	193	244	101	115
Bzw1	1743.31	-0.59475	0.134373	-4.4261	9.59517e-06	0.000761384	1396	2051	2133	1362	1751
Dnmt3l	1301.38	0.485729	0.109795	4.42396	9.69069e-06	0.000764959	972	1106	1003	1573	2099
Srsf3	1267.52	-0.553445	0.125251	-4.41868	9.93039e-06	0.000779818	1046	1509	1465	983	1335
Ammecr1	221.456	-0.856493	0.193923	-4.41668	1.00231e-05	0.000783039	178	283	287	156	191
Usp28	1401.52	0.536521	0.121579	4.41293	1.01982e-05	0.000791421	954	1301	1028	1569	2513
Gm13110	60.5788	1.34705	0.305305	4.41215	1.02348e-05	0.000791421	22	39	43	90	135
A4galt	274.537	0.740739	0.168274	4.40198	1.07266e-05	0.000825242	169	255	176	355	494
Impact	1196.79	-0.610804	0.139001	-4.39425	1.11158e-05	0.00085086	1018	1293	1515	914	1211
Scd1	632.024	0.612897	0.139587	4.39077	1.12948e-05	0.000860223	415	507	515	707	1189
Carnmt1	283.189	-0.808089	0.184253	-4.38577	1.15578e-05	0.000867177	221	361	367	196	261
Rps27a-ps2	1021.76	0.560177	0.127686	4.38716	1.14842e-05	0.000867177	784	840	731	1167	1827
Pfkl	1472.23	0.638407	0.145545	4.38632	1.15283e-05	0.000867177	898	1504	951	1824	2579
Psma8	86.795	-1.15133	0.26296	-4.37833	1.19591e-05	0.000892866	81	131	97	52	65
Rbm3	431.193	-0.682577	0.155979	-4.37608	1.20833e-05	0.000897719	368	501	534	294	453
Mt1	580.143	0.72675	0.166348	4.36886	1.24897e-05	0.0009189	455	483	322	718	1075
Ybx2	155.307	0.937686	0.214581	4.36984	1.24337e-05	0.0009189	83	131	102	181	341
1700001L05Rik	231.108	0.809732	0.185535	4.36431	1.27524e-05	0.0009337	126	183	183	271	471
Zdhhc21	310.53	-0.70619	0.161905	-4.36175	1.29024e-05	0.000934609	265	384	368	219	310
Cbfb	445.346	-0.659188	0.151118	-4.36207	1.2884e-05	0.000934609	384	507	549	328	446
Atp1b2	181.537	0.88191	0.202229	4.36095	1.29498e-05	0.000934609	111	153	112	209	390
Rps6ka6	571.625	-0.665389	0.152644	-4.35908	1.30607e-05	0.000938145	453	711	697	410	584
Fat2	169.155	1.00843	0.231558	4.355	1.33068e-05	0.00095131	93	162	81	211	367
Lrrc58	828.213	-0.579964	0.133476	-4.34507	1.39229e-05	0.000990682	691	991	960	602	904
Zyx	119.951	-1.00344	0.231191	-4.34033	1.42267e-05	0.00100757	142	145	123	82	91
Rragd	252.074	-0.781412	0.180132	-4.338	1.43783e-05	0.00101357	249	265	315	189	219
Abcg2	318.181	-0.717702	0.165493	-4.33675	1.44603e-05	0.00101463	284	427	334	251	280
Sqstm1	1127.63	0.530829	0.122493	4.33356	1.46716e-05	0.00102251	831	917	880	1259	2017
Smtnl2	381.398	0.8071	0.186267	4.33302	1.47075e-05	0.00102251	215	369	234	428	803
Pid1	102.235	-1.10474	0.255062	-4.33126	1.48256e-05	0.00102601	94	137	130	47	98
Piezo2	28.674	-1.99686	0.462102	-4.32125	1.55148e-05	0.00106141	38	38	36	10	14
Gm16233	49.1736	-1.53782	0.356	-4.31972	1.56226e-05	0.00106141	42	73	70	27	26
Ap1s3	103.639	-1.22229	0.282839	-4.32151	1.54966e-05	0.00106141	79	122	171	57	78
Rbm12	362.141	-0.680322	0.157476	-4.32017	1.55911e-05	0.00106141	304	443	433	258	367
Basp1	368.591	-0.672647	0.155803	-4.31729	1.57957e-05	0.00106141	354	408	427	297	331
Gm7729	1026.56	0.481673	0.111557	4.31774	1.57637e-05	0.00106141	716	904	822	1225	1673
Pgk1-rs7	1075.79	0.70683	0.163737	4.31685	1.58273e-05	0.00106141	682	1099	608	1347	1951
Lgals9	38.171	1.75239	0.406297	4.31309	1.60992e-05	0.00107488	15	15	24	46	115
Snhg5	611.316	-0.557462	0.129316	-4.31085	1.62629e-05	0.00108105	580	675	673	454	667
Fxr2	1250.01	0.525191	0.121902	4.30832	1.645e-05	0.00108872	846	1053	1031	1383	2246
Efhb	36.2351	1.61428	0.374819	4.30683	1.65614e-05	0.00109132	15	23	17	59	84
Capn2	161.249	-0.920176	0.214203	-4.29581	1.7406e-05	0.00112737	187	216	143	107	138
Fhl1	254.824	-0.74458	0.173216	-4.29857	1.71904e-05	0.00112737	246	348	247	176	250
Ddah2	221.512	0.838563	0.195197	4.29598	1.7392e-05	0.00112737	133	213	122	293	415
Gfap	134.248	1.11737	0.260048	4.29679	1.73288e-05	0.00112737	68	68	115	159	318
Csrnp3	105.821	-1.0256	0.23907	-4.28996	1.78703e-05	0.00115252	102	153	113	69	83
Gm14681	4058.52	0.492479	0.114952	4.28421	1.83391e-05	0.00117774	2840	3432	3335	4367	7308
Rap1gap2	114.978	0.989073	0.231245	4.27716	1.89296e-05	0.00121054	70	90	68	139	252
Slf1	126.286	-0.990624	0.231778	-4.27401	1.91985e-05	0.00122257	103	170	165	75	112
Fbn1	70.747	-1.3289	0.311094	-4.27169	1.93993e-05	0.00122517	91	82	80	48	36
Smo	152.017	-0.961446	0.225091	-4.27137	1.94274e-05	0.00122517	186	175	153	113	109
Wdr62	699.208	0.514376	0.120442	4.27075	1.94818e-05	0.00122517	485	601	558	850	1145
Gm3362	1051.49	0.527426	0.123765	4.2615	2.03061e-05	0.00127173	773	901	784	1165	1889
Creb1	529.089	-0.631129	0.148133	-4.26057	2.03909e-05	0.00127179	445	621	637	422	502
Spred3	89.0673	-1.17661	0.27639	-4.25706	2.07128e-05	0.00128657	102	108	103	65	50
H3f3a	428.169	-0.618376	0.145326	-4.25511	2.0895e-05	0.00129259	368	538	472	313	449
Oip5os1	812.722	-0.591113	0.139023	-4.25191	2.11958e-05	0.00130587	676	941	979	584	887
Banp	288.019	0.654551	0.154044	4.24913	2.14604e-05	0.00131682	195	237	213	357	509
Polq	218.84	-0.811334	0.191119	-4.24519	2.18413e-05	0.00133478	235	261	228	176	169
Adamts14	133.613	0.897894	0.211609	4.24317	2.20386e-05	0.00133981	94	92	86	173	263
Aldoc	99.1582	1.16647	0.274983	4.24197	2.21569e-05	0.00133981	67	70	45	113	246
Cyp2s1	42.0603	1.53524	0.361946	4.24164	2.21888e-05	0.00133981	21	24	21	54	113
Rhobtb3	213.417	-0.757943	0.178788	-4.23935	2.24166e-05	0.0013482	213	255	233	165	184
Ryr1	366.392	0.640748	0.151429	4.23133	2.32313e-05	0.00139167	277	298	246	470	620
Ccne2	147.217	-0.89901	0.21289	-4.22289	2.41187e-05	0.00143915	133	171	194	100	126
Osbpl10	76.8693	1.14759	0.271864	4.22118	2.43029e-05	0.00144255	35	61	48	101	172
Ndrg2	76.4081	1.3135	0.311211	4.22059	2.43661e-05	0.00144255	56	36	38	91	196
Ppp1r2	243.485	-0.711412	0.168693	-4.21719	2.47368e-05	0.00145257	226	285	284	169	245
Rpl23a-ps3	1320.77	0.496058	0.11764	4.21675	2.47851e-05	0.00145257	999	1170	951	1517	2253
Itpr3	1042.76	0.511295	0.121263	4.2164	2.48229e-05	0.00145257	788	929	734	1238	1743
Gm6532	35.6571	1.73528	0.412604	4.20567	2.60307e-05	0.00151739	10	30	12	60	85
Sinhcaf	643.754	-0.541737	0.129268	-4.1908	2.77968e-05	0.00161413	570	784	679	528	648
2900097C17Rik	581.126	-0.541571	0.129356	-4.18668	2.83061e-05	0.00163743	555	696	579	468	596
Prom1	164.029	-0.80754	0.193427	-4.17491	2.9811e-05	0.00171793	164	191	189	115	149
Khnyn	234.977	0.757294	0.181492	4.17259	3.01155e-05	0.0017289	135	222	155	290	446
Cdk5rap3	369.94	0.638458	0.153092	4.17042	3.04036e-05	0.00173886	262	308	263	420	698
Mib2	261.932	0.689516	0.165489	4.16653	3.09268e-05	0.00175553	189	197	190	357	430
Tjp3	183.323	0.82238	0.197363	4.16685	3.08844e-05	0.00175553	105	170	114	266	309
Trmt11	115.841	-0.956874	0.230142	-4.15776	3.21387e-05	0.00181076	113	145	139	63	113
Nfe2l1	1576.18	0.483316	0.116224	4.15847	3.20381e-05	0.00181076	1123	1342	1277	1724	2782
Fat1	9699.79	-0.464301	0.111818	-4.15228	3.29177e-05	0.00184778	9239	10439	10245	8614	9609
Fermt1	74.1646	-1.14263	0.275373	-4.14939	3.33369e-05	0.00186265	76	103	83	46	54
Erbin	390.212	-0.649056	0.156455	-4.14851	3.34643e-05	0.00186265	337	467	456	318	355
Rps27a	789.276	0.528165	0.127332	4.14792	3.35513e-05	0.00186265	603	642	594	907	1374
Rara	450.036	0.607778	0.146561	4.14692	3.36974e-05	0.00186393	306	333	382	547	785
Gm9794	3425.66	0.516819	0.12468	4.14517	3.39561e-05	0.00187141	2762	2757	2470	3859	6030
Parpbp	182.672	-0.83819	0.202254	-4.14425	3.40928e-05	0.00187214	168	254	194	104	192
Bmpr2	624.738	-0.557278	0.134562	-4.1414	3.45187e-05	0.00188868	562	679	731	477	665
Snord78	155.193	-1.01714	0.24583	-4.13759	3.50972e-05	0.00191343	105	221	218	94	132
Snord64	22.9369	-2.38303	0.576158	-4.13607	3.53299e-05	0.00191921	17	31	46	8	7
Arrdc3	495.959	-0.611635	0.147977	-4.13331	3.57578e-05	0.00193552	412	581	598	378	503
Rab11fip4	646.221	0.526319	0.127409	4.13093	3.61305e-05	0.00194807	450	593	474	759	1103
Slc15a1	47.7617	1.42897	0.345982	4.13019	3.62467e-05	0.00194807	25	35	19	63	121
B230219D22Rik	403.949	-0.61318	0.148497	-4.12923	3.63983e-05	0.0019493	348	498	452	288	435
Cald1	321.525	-0.745375	0.180643	-4.12623	3.68751e-05	0.00196788	342	415	297	265	259
Selenot	530.23	-0.741632	0.179961	-4.12107	3.77117e-05	0.00200547	403	608	738	394	485
Tbc1d4	160.792	-0.809235	0.196452	-4.11925	3.801e-05	0.00201042	154	210	172	116	142
Meg3	4871.67	-0.463046	0.11242	-4.11889	3.807e-05	0.00201042	4770	5028	5191	4190	5017
Tenm4	739.673	-0.722184	0.175499	-4.11504	3.87109e-05	0.00203716	741	846	822	667	533
Ptbp2	438.332	-0.676228	0.164553	-4.10949	3.96539e-05	0.00207957	351	511	564	329	424
Fads2	494.371	0.556133	0.135358	4.10862	3.98036e-05	0.00208022	339	395	410	598	837
Kcnq3	23.8977	-2.28382	0.556734	-4.10217	4.09294e-05	0.00212441	30	28	37	12	4
Ttyh2	241.887	0.839349	0.204585	4.10268	4.08388e-05	0.00212441	133	196	181	251	545
Gm35315	135.101	-0.918402	0.224079	-4.09856	4.15726e-05	0.00215042	109	186	168	86	121
Gm23455	323.558	-0.780273	0.19056	-4.09463	4.22846e-05	0.00217982	248	399	430	251	271
Slc12a7	745.826	0.544363	0.133204	4.08667	4.37606e-05	0.00224826	515	657	567	812	1374
Lrrc31	62.9334	1.19676	0.293073	4.0835	4.43615e-05	0.00227143	34	50	31	88	137
Tcf12	434.855	-0.602654	0.147727	-4.0795	4.51318e-05	0.00230309	440	490	451	363	403
Efnb2	194.145	-0.778873	0.191021	-4.07742	4.55382e-05	0.00230828	189	210	240	145	170
Zkscan17	704.994	0.552767	0.135557	4.07774	4.54751e-05	0.00230828	485	617	537	765	1309
Gm10132	994.985	0.518436	0.12718	4.07638	4.57421e-05	0.00231089	768	842	718	1120	1753
Lratd2	73.7527	-1.132	0.277902	-4.07339	4.63333e-05	0.00233298	70	95	95	46	54
Galnt10	85.426	-1.08396	0.266667	-4.06486	4.80616e-05	0.00241199	102	90	103	52	67
Unc13a	92.4636	0.979715	0.241225	4.06142	4.8775e-05	0.00243971	60	69	54	131	176
Gm38020	95.338	-1.09827	0.270845	-4.05497	5.01407e-05	0.00249208	75	119	142	55	78
Hnrnpa1l2-ps2	397.251	0.575928	0.142032	4.05492	5.01508e-05	0.00249208	293	320	298	498	658
Spon1	18.5186	-2.56575	0.63319	-4.0521	5.0761e-05	0.00251416	32	23	20	4	7
Stag2	797.404	-0.624189	0.154123	-4.04994	5.12304e-05	0.00252093	613	948	1011	591	821
Vcl	1224.12	-0.476792	0.117714	-4.05043	5.11244e-05	0.00252093	1193	1418	1182	1043	1258
Tia1	249.379	-0.669148	0.165467	-4.044	5.25474e-05	0.00257737	233	312	264	177	256
Tmem126a	87.4862	-1.0376	0.25685	-4.0397	5.35196e-05	0.00261659	86	126	93	52	74
Itpripl2	51.5751	-1.37667	0.340963	-4.03758	5.40043e-05	0.0026318	44	77	69	30	31
Rpl19-ps11	1851.65	0.455076	0.112858	4.03227	5.52403e-05	0.0026834	1392	1661	1384	2057	3165
Dennd5b	295.66	-0.626109	0.155413	-4.02867	5.60941e-05	0.00269039	289	335	322	217	306
Nudt5	347.851	-0.593936	0.147406	-4.02925	5.59551e-05	0.00269039	325	398	384	267	356
Spag5	724.658	0.525124	0.130279	4.03078	5.55922e-05	0.00269039	522	612	562	798	1306
Zfp516	610.027	0.579759	0.143885	4.02932	5.59375e-05	0.00269039	422	591	396	749	1036
Spry4	511.312	-0.682387	0.169512	-4.02561	5.68285e-05	0.00271701	548	597	504	448	406
Elf3	191.705	0.854914	0.212522	4.0227	5.75343e-05	0.00274211	100	176	128	213	417
Zdhhc15	84.3881	-1.12509	0.279756	-4.02169	5.77818e-05	0.00274527	73	101	123	56	58
Mid1	628.663	-0.660931	0.16451	-4.01757	5.88001e-05	0.00278492	669	833	528	507	570
Setbp1	252.654	-0.748711	0.186729	-4.00961	6.08179e-05	0.00287151	280	290	254	208	203
Ror1	38.7978	-1.73684	0.433703	-4.00467	6.21035e-05	0.00292311	40	34	73	15	23
Pkdcc	95.7816	-1.09073	0.272731	-3.99927	6.35372e-05	0.00297213	99	127	108	75	54
Adam19	1265.31	0.508477	0.127129	3.99971	6.34205e-05	0.00297213	953	1126	899	1387	2266
Ube2z	1055.8	0.529621	0.132475	3.99789	6.3911e-05	0.00297631	787	828	843	1146	1931
Gpat2	36.3174	1.66859	0.417409	3.99748	6.40193e-05	0.00297631	16	23	15	39	113
Dlgap5	939.053	0.491054	0.122873	3.99645	6.43001e-05	0.00298022	685	828	712	1037	1652
Phf19	286.034	0.618168	0.154916	3.99033	6.5981e-05	0.00304881	189	234	226	355	493
Gm42664	137.223	-0.961822	0.241202	-3.98762	6.67384e-05	0.00307443	106	164	202	87	118
Rabgef1	377.265	0.671559	0.168639	3.98223	6.82706e-05	0.00313548	224	348	275	411	751
B3gnt5	127.059	-0.881428	0.221471	-3.97989	6.89483e-05	0.00315704	123	177	130	91	105
Cisd2	105.036	-0.964997	0.24256	-3.97839	6.93832e-05	0.00316284	97	136	127	77	77
Dnm1	106.659	0.967008	0.243088	3.97802	6.94924e-05	0.00316284	71	88	54	135	223
Psmd3	1145.13	0.46879	0.117869	3.97722	6.97259e-05	0.00316397	850	992	888	1266	1983
Zfp36l2	397.517	-0.594095	0.14942	-3.97601	7.00813e-05	0.00316611	349	456	462	319	389
Castor1	261.926	0.679354	0.170879	3.97564	7.01909e-05	0.00316611	179	216	187	294	511
Mmp25	110.149	-0.987651	0.248565	-3.97341	7.08523e-05	0.00318646	124	113	137	80	79
Zfp652	1347.61	0.592172	0.149078	3.97223	7.12029e-05	0.00319275	817	1181	1104	1388	2667
Fsd1l	110.703	-0.973139	0.245178	-3.96911	7.21426e-05	0.00322535	105	172	106	72	92
Rpl38-ps2	389.735	0.57366	0.144579	3.96779	7.25423e-05	0.00323368	293	311	290	473	665
Mdc1	2289.37	0.457121	0.115264	3.96587	7.31298e-05	0.00325031	1793	1937	1733	2539	3924
Clcn5	386.477	-0.605719	0.152793	-3.96432	7.36068e-05	0.00326194	345	469	422	324	356
Enc1	1068.38	-0.472557	0.119258	-3.96246	7.41806e-05	0.00326967	996	1153	1155	913	1099
Twf2	273.848	0.644027	0.162536	3.96236	7.42127e-05	0.00326967	173	251	195	333	490
Zfp345	119.652	-0.976564	0.246699	-3.95853	7.54125e-05	0.0033129	93	149	171	77	100
Gm40040	79.6643	-1.12526	0.284467	-3.9557	7.63106e-05	0.00334267	93	117	70	51	57
Ypel2	119.094	0.890783	0.225498	3.95029	7.80551e-05	0.00340923	87	89	67	169	214
Ube2d2a	375.874	-0.5776	0.146298	-3.9481	7.87737e-05	0.00342336	338	440	417	276	407
Socs3	428.388	0.574418	0.145499	3.94793	7.88303e-05	0.00342336	302	398	289	531	718
Slc4a4	113.455	-0.920973	0.233367	-3.94645	7.9317e-05	0.00342909	101	153	133	82	89
Bicd1	128.296	-0.878853	0.222711	-3.94616	7.94147e-05	0.00342909	129	143	158	95	102
mt-Nd1	13145.7	-0.543226	0.137707	-3.9448	7.98657e-05	0.00343172	10616	14012	16843	10500	13559
Slc38a1	1927.95	-0.477641	0.121087	-3.94461	7.99285e-05	0.00343172	1670	2237	2091	1711	1888
Anxa5	73.6533	-1.09004	0.276446	-3.94304	8.04556e-05	0.00344459	86	88	82	42	61
Rpl26	1204.4	0.543787	0.138166	3.93575	8.29377e-05	0.00353091	951	951	883	1302	2230
Catsperg1	162.599	0.815601	0.207216	3.936	8.28512e-05	0.00353091	113	142	89	205	313
Ivns1abp	1097.43	-0.451597	0.114771	-3.93476	8.32804e-05	0.00353557	1057	1173	1144	906	1194
Gnas	896.524	-0.630937	0.160486	-3.93143	8.44433e-05	0.00356497	917	1082	871	811	721
Tnip1	417.501	0.585288	0.148873	3.93145	8.44334e-05	0.00356497	282	384	296	474	763
Ubqln2	398.551	-0.6635	0.16885	-3.92951	8.5118e-05	0.00358347	336	485	471	340	337
BC067074	582.368	0.506618	0.129034	3.92623	8.62861e-05	0.00362258	406	532	438	677	990
Gm8430	1323.78	0.48894	0.124671	3.92183	8.78786e-05	0.00367925	1044	1139	944	1492	2285
Capns1	775.514	0.540453	0.138024	3.91566	9.01574e-05	0.00376426	612	675	514	914	1331
Stra8	21.2668	1.98216	0.506365	3.91449	9.05949e-05	0.00377213	7	9	11	30	63
Lrrn4	126.6	-0.915665	0.234334	-3.90752	9.3249e-05	0.00384834	114	137	178	80	114
Srsf6	1823.63	-0.460748	0.11788	-3.90861	9.28275e-05	0.00384834	1573	2019	2052	1570	1882
Gm5540	67.5024	1.164	0.29783	3.90828	9.29549e-05	0.00384834	38	38	48	80	163
Platr11	25.9615	1.76423	0.451554	3.90702	9.34408e-05	0.00384834	7	16	14	41	66
Nbea	267.473	-0.658491	0.168652	-3.90444	9.44447e-05	0.00387914	264	315	282	221	237
Slfn9	99.7255	1.15536	0.296353	3.8986	9.67515e-05	0.00396315	34	62	90	122	236
Ccn2	315.001	-0.616108	0.158224	-3.8939	9.86467e-05	0.00402989	290	345	371	243	314
Zfp934	304.576	-0.811889	0.208599	-3.89211	9.93768e-05	0.0040488	208	406	413	193	303
Gm47024	116.829	-0.872564	0.224463	-3.88734	0.000101347	0.00411801	107	145	142	80	102
Tpbg	56.7748	-1.20538	0.310246	-3.88523	0.000102232	0.00414286	61	76	65	34	40
Parva	99.2409	-0.984027	0.253391	-3.88343	0.000102992	0.00416251	111	117	110	75	68
Plcb3	693.913	0.47098	0.121338	3.88156	0.000103786	0.00417106	497	604	554	804	1154
Slc25a30	310.002	0.695066	0.179095	3.881	0.000104029	0.00417106	196	271	221	325	642
Myom3	19.844	1.99479	0.513962	3.8812	0.000103943	0.00417106	7	9	9	31	55
Ptpn14	1084.87	-0.481278	0.124122	-3.87747	0.000105547	0.00422078	1104	1216	1036	921	1114
Cachd1	227.609	-0.710212	0.183333	-3.87389	0.000107111	0.00427205	217	257	266	187	192
Pxdn	319.256	-0.624539	0.161408	-3.86931	0.000109142	0.00433969	332	396	294	239	325
Pten	1159.32	-0.581935	0.150418	-3.86878	0.00010938	0.00433969	890	1333	1479	897	1191
Ppp4r3a	1364.9	-0.493843	0.127747	-3.86579	0.000110729	0.00438175	1136	1518	1607	1134	1418
Tcf7	410.449	0.614899	0.159094	3.86501	0.000111083	0.00438432	283	343	307	435	805
Tmem231	321.015	0.621186	0.160777	3.86364	0.00011171	0.00439761	210	256	262	361	604
Eif4g3	684.296	-0.656647	0.170104	-3.86028	0.000113259	0.00443552	663	829	714	628	522
Rnf213	1453.97	0.580961	0.150486	3.86057	0.000113122	0.00443552	953	1199	1193	1450	2922
Dgcr8	983.272	0.496301	0.128606	3.85909	0.000113812	0.00444569	685	767	866	1231	1541
Gm14409	263.027	-0.703261	0.182266	-3.85843	0.000114116	0.00444613	245	267	341	193	253
Gm9118	3326.9	0.463214	0.120083	3.85744	0.000114581	0.00445281	2232	3020	2731	3505	5979
Ptges3	1354.76	-0.580977	0.15136	-3.83837	0.000123851	0.00480074	1004	1644	1690	1020	1431
Igfbp2	1196.28	0.552822	0.144122	3.83579	0.00012516	0.00483908	880	1159	745	1382	2110
Noct	419.262	-0.558153	0.145594	-3.83363	0.000126266	0.00485026	414	438	466	325	439
Gm5611	1141.23	0.468	0.122086	3.83335	0.000126409	0.00485026	825	978	920	1230	2018
Tsc1	426.103	0.538093	0.14035	3.83395	0.000126102	0.00485026	318	369	305	518	709
Flnc	419.307	-0.5867	0.153648	-3.81847	0.000134283	0.00513939	459	474	392	316	439
2700081O15Rik	174.865	-0.750882	0.196718	-3.81705	0.000135055	0.00515592	161	196	217	132	156
Sfmbt2	886.847	-0.588795	0.154343	-3.81485	0.000136267	0.00518912	682	1128	1035	752	818
Gm5276	132.476	0.888441	0.232996	3.81311	0.000137227	0.00521257	77	130	68	182	247
Tcea3	278.445	0.611129	0.160556	3.80633	0.000141043	0.0053308	197	212	222	335	491
Fmr1nb	54.4767	1.39249	0.365832	3.80638	0.000141015	0.0053308	38	17	34	68	140
Zfp266	934.092	-0.45184	0.118903	-3.80008	0.000144652	0.00544005	835	1023	1023	780	1005
Hydin	124.224	0.905717	0.238307	3.80064	0.000144325	0.00544005	95	90	67	147	264
Zdbf2	2393.85	-0.419313	0.110597	-3.79137	0.000149816	0.00562034	2053	2756	2542	2102	2517
Rc3h2	817.185	-0.552816	0.145865	-3.78991	0.000150704	0.00563968	656	922	1011	609	894
Sipa1l2	585.133	0.522738	0.138061	3.78629	0.000152912	0.00569419	451	515	403	680	1005
Fabp3-ps1	390.891	0.596694	0.157573	3.78677	0.000152617	0.00569419	316	288	281	484	664
Gulp1	21.9574	-2.03437	0.537841	-3.78247	0.000155277	0.00575712	22	42	24	8	10
Gclc	589.18	-0.496368	0.131233	-3.78234	0.000155362	0.00575712	571	629	629	486	615
Arhgef18	611.031	0.504976	0.133763	3.77514	0.000159916	0.00591144	478	486	468	756	975
Gm38374	101.426	-0.929482	0.246329	-3.77333	0.000161081	0.00594002	85	134	128	70	83
Rpl19-ps1	461.872	0.588616	0.15607	3.77148	0.000162282	0.00596977	367	352	332	517	854
Msh6	5268.17	0.387768	0.102895	3.76858	0.000164177	0.00602484	3768	4644	4503	5750	8735
Fn1	9508.74	0.412225	0.109418	3.76743	0.000164935	0.00603806	7619	8510	6918	11014	15176
Top2a	8097.59	0.480885	0.127767	3.76376	0.00016738	0.00611279	5464	7020	6796	8249	15104
Tex19.1	170.554	0.760024	0.202065	3.76129	0.000169036	0.00615845	106	117	144	203	333
Olfr984	20.2751	-2.20139	0.58573	-3.75837	0.000171025	0.00617157	20	44	19	7	8
Gm26384	363.626	-0.560407	0.149072	-3.7593	0.000170386	0.00617157	319	452	384	271	395
Rack1	6755.54	0.40339	0.107328	3.75849	0.000170942	0.00617157	5291	5965	5172	7367	11332
Grb7	186.244	0.687352	0.182842	3.75927	0.000170413	0.00617157	118	163	133	226	343
Cdc14b	204.374	-0.67433	0.179477	-3.7572	0.000171825	0.0061857	182	256	226	156	195
Nox4	25.9088	-1.80972	0.481897	-3.7554	0.000173063	0.00621549	25	45	31	12	12
Triobp	362.922	0.604044	0.160918	3.75374	0.000174216	0.00624211	245	355	232	453	617
Adam23	318.936	-0.645087	0.171911	-3.75244	0.000175118	0.00625965	311	397	318	277	269
Dleu2	238.12	-0.675684	0.180112	-3.75148	0.000175796	0.0062691	205	270	297	183	225
2610307P16Rik	72.1372	-1.11313	0.296886	-3.74934	0.000177297	0.00630779	87	85	80	31	71
Gng5	127.786	-0.816056	0.217746	-3.74775	0.00017843	0.00633323	112	170	146	90	115
Gramd1a	285.452	0.588477	0.157103	3.7458	0.000179823	0.00636774	182	259	216	358	478
Arpc5	348.989	-0.56692	0.151405	-3.74438	0.000180839	0.00638879	304	405	398	273	360
Syk	271.718	0.616995	0.164884	3.742	0.000182559	0.00643456	174	248	198	315	498
Ntpcr	62.9342	1.12731	0.301578	3.73805	0.00018545	0.00652131	26	48	45	80	143
Yes1	772.134	-0.537776	0.143922	-3.73659	0.00018653	0.00653683	606	927	911	631	783
Gtsf1l	167.62	0.700042	0.187363	3.73629	0.000186754	0.00653683	111	136	122	226	281
Rpl23	1739.33	0.42705	0.114415	3.73246	0.000189619	0.00662182	1347	1493	1356	1906	2951
Flvcr1	102.561	-0.882587	0.236616	-3.73004	0.000191452	0.00667045	101	118	126	69	90
Gm6477	1204.55	0.444098	0.119111	3.72845	0.000192663	0.00669726	822	1079	1005	1315	2075
Eftud2	1897.76	0.461332	0.123791	3.72669	0.000194009	0.00672861	1354	1603	1580	1988	3420
Dpp6	67.7044	-1.24451	0.334484	-3.72069	0.000198681	0.00687489	75	99	68	53	30
Baz2a	4368.01	0.366133	0.0985713	3.71439	0.000203693	0.00703228	3369	3938	3457	4914	6934
Gm14444	246.825	-0.697317	0.187823	-3.71263	0.000205119	0.00706542	196	290	321	176	246
Phf11d	205.918	0.649566	0.175029	3.71119	0.000206285	0.00708946	128	182	154	257	361
Rab30	53.4327	-1.20278	0.324342	-3.70836	0.000208604	0.00715294	59	65	65	35	34
Vegfa	376.631	0.633419	0.170907	3.70622	0.000210375	0.00719737	239	385	234	457	671
Gm5425	191.508	0.677905	0.182952	3.70537	0.000211082	0.00720533	142	155	127	239	341
Gm6560	3238.86	0.424043	0.11458	3.70087	0.000214866	0.00731798	2326	3208	2345	3896	5020
Scpep1	867.521	0.513324	0.138771	3.69907	0.000216388	0.00732047	690	730	611	949	1560
Sgsm1	93.6858	0.930145	0.251428	3.69944	0.000216072	0.00732047	70	63	55	118	192
Sohlh2	57.4716	1.21169	0.327473	3.70013	0.000215492	0.00732047	30	50	25	70	140
Nphs1	152.211	0.748485	0.202435	3.69741	0.00021781	0.00735219	106	106	116	184	291
Ctc1	1057.71	0.497566	0.134753	3.69243	0.000222117	0.00743846	776	938	787	1102	1958
Coro2b	104.513	0.890123	0.241083	3.69219	0.000222329	0.00743846	76	61	75	147	189
Fetub	39.7055	1.36845	0.370514	3.6934	0.000221279	0.00743846	27	21	18	70	74
Cntd1	22.11	2.01257	0.54494	3.69319	0.000221458	0.00743846	7	13	8	21	80
Ddit4	611.261	0.63422	0.171859	3.69034	0.000223955	0.00747634	329	650	422	732	1103
Memo1	215.765	-0.655272	0.177597	-3.68966	0.000224552	0.00747979	195	250	251	169	204
Pphln1	332.6	-0.61759	0.167456	-3.68808	0.000225955	0.00751001	292	351	420	252	337
Lrrc8c	139.621	-0.877016	0.238057	-3.68405	0.000229555	0.00761298	177	166	122	104	110
Pgap1	581.88	-0.57715	0.156792	-3.68098	0.000232335	0.00768837	460	666	729	422	638
Gm47341	96.3676	-0.905499	0.246268	-3.67689	0.000236093	0.00779571	86	131	111	68	79
Krt8-ps	94.7273	-0.910279	0.247768	-3.67392	0.000238861	0.00785288	85	122	115	67	77
Hnrnpa0	1351.34	-0.447217	0.121726	-3.67397	0.000238815	0.00785288	1198	1483	1483	1199	1366
Mtus2	51.1923	1.15518	0.314557	3.67241	0.000240273	0.0078822	33	32	29	75	104
Mfap3l	96.5845	-0.904217	0.246596	-3.6668	0.000245607	0.00803977	112	117	96	64	84
Grik3	106.501	-0.920682	0.251252	-3.66438	0.000247943	0.00806399	119	130	110	85	73
Kbtbd7	102.035	-0.873364	0.238293	-3.66508	0.000247263	0.00806399	98	123	123	61	100
Zic3	784.239	-0.53983	0.147302	-3.66478	0.000247555	0.00806399	612	958	915	661	767
Jmjd1c	2756.14	-0.403448	0.110147	-3.66282	0.00024945	0.00809565	2402	2952	3054	2374	3004
Hsh2d	38.6207	1.38875	0.379656	3.65791	0.00025428	0.00823476	18	24	23	45	104
Gm4631	159.703	-0.743917	0.203472	-3.65611	0.000256072	0.00827512	144	181	199	121	143
Kat2a	860.12	0.424184	0.116114	3.65318	0.00025901	0.00833996	616	795	676	1003	1376
Mink1	460.84	0.511773	0.140117	3.65247	0.000259729	0.00833996	355	391	335	538	782
Ak3l2-ps	67.7002	1.11663	0.305683	3.65288	0.000259312	0.00833996	40	55	33	76	166
Per1	208.873	0.662511	0.181459	3.65103	0.000261194	0.00836927	147	179	141	240	396
Exoc6b	252.293	-0.643223	0.176229	-3.64992	0.000262327	0.00838781	237	312	263	215	219
Ube4a	277.567	-0.616343	0.169159	-3.64358	0.000268869	0.00857889	248	306	333	224	264
Nudc	731.929	0.459184	0.126054	3.64275	0.000269745	0.00858876	559	588	597	873	1173
Gm47342	27.2627	-1.95164	0.53592	-3.64166	0.000270887	0.00860707	13	50	47	8	16
mt-Nd5	8726.6	-0.461419	0.126747	-3.64046	0.000272148	0.00862902	7028	9583	10455	7433	9100
Trim59	820.414	-0.620731	0.170587	-3.63879	0.000273917	0.00866698	589	1010	1054	565	905
Mcc	38.1651	-1.37921	0.379185	-3.6373	0.000275508	0.00869916	42	50	47	22	23
Fdxr	74.6497	0.962432	0.26525	3.62839	0.000285195	0.00898632	51	49	48	106	140
Btbd11	105.193	-0.846131	0.233287	-3.62699	0.000286739	0.00901622	102	129	121	77	88
Sntb1	41.5371	-1.32981	0.366838	-3.62508	0.000288875	0.00906457	47	55	48	26	24
Fzd6	95.5223	-0.875332	0.241635	-3.62254	0.000291729	0.00911639	96	112	113	63	86
Bcam	520.695	-0.605699	0.167183	-3.62298	0.000291226	0.00911639	529	640	490	470	434
Spats2l	50.8764	-1.22681	0.339156	-3.61725	0.000297746	0.00928528	47	84	53	29	37
Gm10052	1895.42	0.381931	0.105803	3.60982	0.000306404	0.00953565	1429	1750	1475	2254	2880
Gm50452	21.9765	-2.03487	0.563947	-3.60826	0.000308254	0.00957357	14	32	42	8	10
Tenm3	714.435	-0.519418	0.144041	-3.60604	0.000310908	0.00963625	693	860	684	642	660
Zswim1	341.172	0.580694	0.161063	3.60539	0.000311681	0.00964048	237	301	248	368	647
Arpp19	349.886	-0.593353	0.164696	-3.60272	0.000314908	0.0097144	315	371	425	291	329
Orc3	318.148	-0.571671	0.158694	-3.60235	0.000315353	0.0097144	287	386	339	220	364
Tex14	446.766	0.553694	0.153883	3.59814	0.000320504	0.00985306	271	381	389	500	810
Id3	112.769	-0.893366	0.248356	-3.59712	0.000321756	0.00987153	127	110	139	85	86
Sgsm2	311.658	0.627211	0.174567	3.59295	0.00032696	0.0100109	221	228	253	334	610
Ajuba	1464.01	-0.465605	0.129658	-3.59104	0.000329364	0.0100642	1376	1542	1597	1327	1414
Cdk14	64.8338	-1.07293	0.298836	-3.59037	0.000330211	0.0100698	61	100	67	41	50
Myo18a	732.893	0.472647	0.131834	3.58516	0.000336872	0.0102414	555	685	508	857	1210
Capn11	30.4043	1.50093	0.418679	3.58491	0.000337189	0.0102414	18	14	16	40	79
Srsf2	1995.97	-0.38083	0.106247	-3.58437	0.000337895	0.0102423	1719	2240	2110	1720	2222
Rpl19	1563.29	0.445049	0.12427	3.58131	0.000341872	0.0103421	1224	1342	1182	1667	2747
Nap1l2	66.1176	-1.10099	0.307854	-3.57633	0.000348454	0.0104785	54	91	88	47	43
Slc7a3	639.682	-0.548806	0.153436	-3.57677	0.000347869	0.0104785	625	740	647	587	556
Trappc13	377.694	-0.538702	0.150588	-3.57732	0.000347136	0.0104785	348	484	361	301	393
Igbp1	287.997	0.557993	0.156075	3.57516	0.000350019	0.0105047	198	231	237	353	482
Gm38162	20.4714	-1.93841	0.542627	-3.57227	0.000353903	0.0105682	23	26	31	6	12
Cul3	1075.85	-0.467215	0.130809	-3.57173	0.000354631	0.0105682	877	1223	1243	912	1123
Ndufv3	257.665	0.5795	0.16225	3.57165	0.000354743	0.0105682	192	206	192	319	433
Nol4l	167.021	0.759398	0.212626	3.57151	0.000354923	0.0105682	124	106	127	190	337
Ttc28	92.8148	-0.954958	0.267445	-3.57066	0.000356078	0.0105818	87	120	110	75	60
Ubox5	134.239	-0.838188	0.234944	-3.5676	0.000360264	0.0106644	159	177	111	95	117
Zfp644	775.007	-0.469431	0.131576	-3.56776	0.000360044	0.0106644	688	813	896	641	828
Gm28229	66.811	-1.03284	0.289773	-3.56432	0.000364802	0.0107777	70	76	84	45	50
Adk	371.454	-0.598273	0.167941	-3.56241	0.000367466	0.0108352	385	429	364	329	321
Rundc3b	46.2714	-1.2788	0.359611	-3.55607	0.000376442	0.0110784	60	50	54	30	27
Fzd10	109.493	-0.812224	0.228527	-3.55417	0.000379171	0.011137	100	142	124	73	104
Zfp942	133.52	-0.964377	0.271393	-3.55344	0.000380227	0.0111465	81	206	179	90	108
Mirg	749.688	-0.491896	0.138536	-3.55066	0.000384268	0.0112432	770	818	733	662	728
Map4k5	431.184	-0.49363	0.139187	-3.54653	0.00039034	0.0113988	385	502	459	331	484
Tgfb2	23.4233	-1.76929	0.499301	-3.54354	0.000394794	0.0114935	25	35	30	12	10
Prc1	1391.07	0.392855	0.110871	3.54334	0.000395099	0.0114935	1030	1297	1081	1545	2278
Mat2a	1799.09	-0.525476	0.148396	-3.54103	0.00039857	0.0115723	1362	2027	2285	1445	1878
Gna13	945.73	0.478576	0.135317	3.5367	0.000405162	0.0117412	608	806	842	1031	1669
Dclk1	22.7951	-1.85426	0.524381	-3.53609	0.000406094	0.0117457	36	27	24	7	14
Itgb1	2345.92	-0.365985	0.103552	-3.53432	0.000408829	0.0118023	2056	2564	2478	2027	2640
Podxl	258.842	-0.608364	0.172174	-3.53343	0.000410201	0.0118194	243	343	245	186	278
Myl12a	319.043	-0.575103	0.162797	-3.53263	0.000411441	0.0118326	298	422	297	237	343
Uty	25.4228	1.95037	0.552252	3.53166	0.000412954	0.0118537	5	9	19	23	92
Pik3c2a	538.405	-0.510851	0.144708	-3.53021	0.000415227	0.0118739	432	668	595	443	557
Fam25c	59.6904	1.06283	0.301052	3.5304	0.000414926	0.0118739	42	42	30	80	125
Micall2	37.051	1.4766	0.419459	3.52025	0.000431148	0.012306	26	19	14	40	107
Tex2	520.145	0.482439	0.137106	3.51872	0.000433629	0.0123073	372	457	408	568	918
Gm2574	328.094	0.572277	0.162607	3.51938	0.000432559	0.0123073	254	280	219	437	508
Dhrs7	75.9453	0.957625	0.272151	3.51873	0.000433621	0.0123073	39	58	56	91	165
Socs6	218.056	-0.648658	0.184555	-3.51471	0.000440227	0.0124479	184	254	267	151	233
Hpcal1	132.611	0.775851	0.220729	3.51495	0.000439835	0.0124479	100	100	83	154	266
Gm5643	518.039	0.500124	0.142329	3.51385	0.000441667	0.0124654	382	493	351	620	853
Smim15	173.581	-0.695841	0.198318	-3.50871	0.000450284	0.0126849	152	194	219	123	174
Wbp2	418.123	0.500398	0.142687	3.50695	0.000453271	0.0127454	322	362	301	498	691
Bend3	652.214	-0.569125	0.162364	-3.50525	0.000456179	0.0127901	602	687	769	595	558
Aplp1	195.218	0.65704	0.187456	3.50503	0.00045655	0.0127901	131	166	141	216	380
Mkrn1	2596.34	0.358341	0.102259	3.50425	0.000457895	0.0128015	1921	2479	2036	2949	4061
Gm20762	58.5476	1.05687	0.301634	3.50381	0.000458645	0.0128015	28	39	46	79	122
Pgm1	179.187	0.779803	0.222669	3.50207	0.000461662	0.012862	128	170	87	219	347
Serinc1	331.322	-0.56405	0.16124	-3.49821	0.000468397	0.0130228	267	420	369	257	346
Btnl7-ps	32.7643	1.43376	0.409907	3.49778	0.00046915	0.0130228	15	19	20	38	90
Gm18558	99.0718	0.873675	0.249851	3.49678	0.000470911	0.0130478	44	84	79	131	190
Tnrc6a	1122.52	-0.39406	0.112722	-3.49586	0.000472544	0.013068	1025	1206	1182	922	1294
Chaf1b	469.486	0.504657	0.144378	3.49539	0.000473366	0.013068	374	390	338	541	802
Nanos3	25.3065	1.62659	0.465512	3.4942	0.000475488	0.0131027	9	15	14	54	42
Kif5c	289.389	-0.553383	0.158395	-3.4937	0.000476381	0.0131035	285	332	294	238	287
Tmsb4x	656.099	-0.499181	0.143179	-3.4864	0.00048957	0.0134419	553	847	660	571	645
Ilk	213.473	-0.636548	0.182626	-3.48553	0.000491159	0.0134611	236	235	210	157	218
mt-Nd3	811.852	-1.13396	0.325577	-3.48291	0.000495993	0.0135375	596	1075	1218	456	656
Arl5a	397.231	-0.513145	0.147383	-3.48172	0.000498196	0.0135375	337	462	448	306	437
Echdc2	393.47	0.554142	0.159144	3.48201	0.000497661	0.0135375	292	286	329	441	711
Capn5	212.602	0.622371	0.178744	3.4819	0.000497863	0.0135375	153	187	142	249	387
Mypn	37.5933	1.26996	0.364762	3.48161	0.00049841	0.0135375	23	25	18	56	80
Cdc37l1	689.959	-0.442677	0.127182	-3.48065	0.000500205	0.0135377	582	811	740	559	772
Gm37123	32.1746	1.43844	0.413214	3.48111	0.000499331	0.0135377	15	20	18	37	89
Gm14403	390.128	-0.502439	0.144408	-3.4793	0.000502723	0.0135816	352	433	432	319	409
4930453N24Rik	337.898	-0.57675	0.165978	-3.47486	0.00051112	0.0136667	284	372	418	246	369
Thoc2	811.676	-0.523021	0.150515	-3.47487	0.000511098	0.0136667	623	930	1006	636	871
Kbtbd2	389.887	-0.508052	0.146122	-3.47689	0.000507258	0.0136667	332	472	420	305	425
Trio	613.718	-0.507413	0.146048	-3.4743	0.000512185	0.0136667	614	625	665	540	589
Rpl3-ps1	3934.02	0.359282	0.103402	3.47461	0.000511599	0.0136667	3017	3729	2989	4455	6175
Sfi1	146.456	0.739139	0.21268	3.47536	0.000510172	0.0136667	103	95	118	175	281
Ndufa4l2	27.8373	1.68711	0.485506	3.47495	0.000510939	0.0136667	4	24	14	38	77
Rgs3	96.9525	0.867999	0.250014	3.47181	0.000516963	0.0137699	71	79	50	139	170
Lbhd1	129.56	-0.86724	0.249969	-3.46939	0.000521636	0.0138457	94	164	181	98	102
Ube2k	1065.13	-0.404219	0.116499	-3.46972	0.000521008	0.0138457	906	1215	1139	870	1224
Gm10335	993.735	0.473584	0.136589	3.46723	0.000525854	0.0139333	800	852	706	1074	1759
Myo9a	699.27	-0.484084	0.139723	-3.4646	0.000531014	0.0140455	568	794	819	584	730
Mb21d2	102.189	-0.852681	0.246156	-3.46399	0.000532232	0.0140531	105	146	93	70	91
2210408I21Rik	31.4569	-1.4491	0.418452	-3.463	0.000534184	0.0140557	32	40	44	16	20
Cited2	134.095	-0.77592	0.224052	-3.46312	0.000533952	0.0140557	114	198	136	95	125
Map7	434.464	0.487437	0.140777	3.46247	0.000535242	0.0140592	285	412	339	513	719
Prr13	91.5386	0.855998	0.24742	3.45969	0.000540797	0.014156	60	78	53	115	181
Vill	73.9388	1.06093	0.306627	3.46	0.000540168	0.014156	45	61	37	76	186
Itgb8	24.2803	-1.6793	0.485678	-3.45763	0.000544946	0.01424	27	34	31	13	11
Mast4	349.277	-0.533178	0.154226	-3.45711	0.000545994	0.0142428	346	425	326	286	355
Orc4	250.457	-0.625319	0.181057	-3.4537	0.000552943	0.0143993	210	289	307	169	279
Gm13268	255.625	0.665866	0.192851	3.45275	0.000554903	0.0144256	192	221	157	271	516
Ankzf1	148.189	0.689099	0.199676	3.45108	0.000558342	0.0144901	95	134	100	196	252
H2az2	278.11	0.586747	0.170095	3.44952	0.000561585	0.0145338	210	214	211	307	519
Mrps24	229.937	0.711696	0.206328	3.44935	0.000561944	0.0145338	167	143	190	248	470
Ubash3a	38.0526	1.25585	0.364298	3.44733	0.000566152	0.0146177	17	28	23	52	87
Arhgap35	1146.37	-0.432302	0.125464	-3.44563	0.000569724	0.0146814	1020	1251	1248	1034	1154
Hus1	359.64	0.557211	0.161734	3.44524	0.000570555	0.0146814	228	293	314	395	663
Tmed8	363.65	-0.511433	0.148501	-3.44397	0.000573244	0.0147256	349	404	381	308	364
4632427E13Rik	347.212	-0.617923	0.179577	-3.441	0.000579579	0.0148631	295	367	450	230	395
Smc1b	95.2124	1.00696	0.292835	3.43865	0.000584619	0.014967	47	65	76	91	243
Sall3	65.4218	-1.26864	0.369184	-3.43633	0.000589649	0.0150704	64	53	115	46	34
Gls	515.445	-0.498487	0.145098	-3.43553	0.000591406	0.0150898	415	627	576	394	579
A530083M17Rik	35.1419	-1.36342	0.397231	-3.43232	0.000598438	0.0152436	32	52	45	20	22
Etv1	79.2142	-1.02549	0.298982	-3.42993	0.000603731	0.0153375	80	74	117	57	55
Gm37245	111.804	-0.909177	0.265086	-3.42974	0.00060415	0.0153375	75	155	154	76	95
Ttc39c	30.1345	1.40548	0.409988	3.42809	0.00060784	0.0154054	16	17	17	40	75
Camk2d	90.9631	-0.906145	0.264408	-3.42707	0.000610135	0.015412	100	128	80	66	72
Mob1a	349.826	-0.534851	0.156049	-3.42745	0.000609278	0.015412	289	415	401	266	382
Apobec3	567.146	0.47409	0.138389	3.42578	0.000613035	0.0154595	426	518	408	625	988
Ddah1	264.338	-0.585929	0.171189	-3.42271	0.000620007	0.0156093	272	289	274	224	245
Pros1	240.066	-0.595046	0.17394	-3.42098	0.000623952	0.0156826	240	303	222	187	242
Eno2	57.0003	1.214	0.354965	3.42007	0.000626049	0.0157093	26	59	20	75	132
Zmym3	413.078	0.514086	0.150484	3.41622	0.000634967	0.0159067	323	337	307	458	734
Cotl1	296.26	0.543381	0.159266	3.41178	0.000645401	0.0161414	225	250	212	384	463
Abhd17c	276.066	-0.537473	0.157582	-3.41075	0.000647843	0.0161758	254	323	292	218	290
Xiap	463.871	-0.61363	0.179979	-3.40945	0.00065093	0.0162261	351	510	628	366	453
Tle6	67.8003	1.00525	0.294926	3.40847	0.000653277	0.0162579	48	55	30	90	139
Tra2b	737.719	-0.504226	0.147961	-3.40784	0.000654789	0.0162688	567	871	881	565	823
Abca7	177.684	0.699825	0.20546	3.40614	0.000658874	0.0163435	125	163	105	201	349
Sec14l2	43.3736	1.16215	0.34126	3.40546	0.000660538	0.016358	26	31	23	58	96
C030017G13Rik	99.3904	-0.805406	0.236639	-3.40351	0.00066525	0.0164214	93	123	115	67	94
Kank3	252.84	0.600074	0.176311	3.40351	0.000665265	0.0164214	175	245	160	304	444
Zfp628	77.8885	-0.910878	0.267794	-3.40141	0.000670381	0.016494	89	88	85	51	68
Kif21b	228.656	0.631584	0.185662	3.4018	0.000669429	0.016494	169	212	136	276	408
Col5a2	44.7188	-1.23584	0.363494	-3.3999	0.000674108	0.016532	61	55	42	27	30
Dtx1	108.275	0.804105	0.236493	3.40012	0.000673554	0.016532	67	102	62	152	187
Gm35066	17.5211	-1.98394	0.583803	-3.3983	0.000678067	0.0166022	21	26	22	5	10
Gpx4-ps2	1207.85	0.401003	0.11804	3.39718	0.000680842	0.0166433	940	1085	918	1324	2012
Map3k7	642.081	-0.442045	0.130147	-3.3965	0.000682541	0.016658	612	677	680	552	676
Aspscr1	395.971	0.507648	0.14951	3.39541	0.000685258	0.0166974	297	302	329	459	674
Ctnnd2	52.54	-1.11131	0.327517	-3.39314	0.000690961	0.0167744	57	62	64	37	34
Bmp1	75.0369	-1.01101	0.297915	-3.39362	0.000689741	0.0167744	87	112	60	51	57
Macroh2a1	713.084	0.437581	0.128972	3.39283	0.000691738	0.0167744	522	688	514	845	1134
Gm20900	542.874	0.483024	0.142455	3.39071	0.00069711	0.0168507	438	451	394	612	932
Gm10284	480.278	0.506889	0.149483	3.39094	0.000696526	0.0168507	346	472	318	589	776
Tmem164	169.243	-0.645489	0.190482	-3.38871	0.000702233	0.0169475	158	213	175	130	165
Chordc1	381.19	-0.50658	0.149698	-3.38401	0.000714347	0.0172125	343	407	439	307	404
Prr5l	42.5044	-1.30203	0.384826	-3.38342	0.000715898	0.0172225	49	62	42	31	20
Mast3	214.054	0.594461	0.17586	3.3803	0.000724057	0.0173911	154	193	143	265	364
Gldc	1271	0.397822	0.117804	3.37698	0.000732855	0.0175746	977	1188	939	1535	1923
Npr3	27.4165	-1.6052	0.475407	-3.37649	0.000734182	0.0175786	32	25	45	11	18
Itpkb	62.88	-1.01812	0.301739	-3.37416	0.0007404	0.0176717	63	92	63	44	46
Prkd3	441.73	-0.469283	0.139066	-3.37454	0.000739383	0.0176717	413	491	462	377	457
Tmem167	338.519	-0.613206	0.18196	-3.37001	0.00075166	0.0177241	250	415	427	239	368
Prrg4	336.128	-0.567173	0.1683	-3.37001	0.000751668	0.0177241	273	380	414	275	331
Exoc5	376.129	-0.549538	0.162957	-3.3723	0.000745442	0.0177241	300	431	460	300	387
Zfp131	406.508	-0.543113	0.161166	-3.3699	0.000751952	0.0177241	335	443	504	330	413
Trim2	444.185	-0.498781	0.148005	-3.37004	0.000751584	0.0177241	387	525	476	392	430
Rab11fip1	550.014	0.437631	0.129837	3.37061	0.000750016	0.0177241	383	506	441	623	913
Fbxo15	668.075	0.457846	0.135753	3.37263	0.000744528	0.0177241	429	627	554	733	1157
Got1l1	247.287	0.740099	0.219564	3.37077	0.000749582	0.0177241	181	235	123	269	512
Gm42047	2932.52	-0.432396	0.128351	-3.36885	0.000754819	0.017764	2704	3246	3048	2771	2778
Pkm	7827.47	0.379476	0.11266	3.36833	0.000756244	0.01777	5868	7779	5647	9211	12001
Lysmd3	124.667	-0.803626	0.238724	-3.36634	0.000761733	0.0178712	113	132	169	73	132
Dynll2	575.306	0.480729	0.142843	3.36543	0.000764255	0.0179027	391	464	512	633	1008
Bmerb1	63.9788	-0.974413	0.2897	-3.36352	0.00076955	0.0179989	64	87	69	40	55
Icam1	180.791	0.666585	0.198441	3.3591	0.000781967	0.0182611	144	144	113	213	336
Jade1	3252.63	-0.412742	0.122897	-3.35844	0.000783829	0.0182765	2696	3504	3761	2869	3423
Mex3c	507.13	-0.511018	0.152225	-3.357	0.000787933	0.0183158	413	569	608	428	510
Igf2bp2	761.66	0.44287	0.131923	3.35704	0.000787814	0.0183158	561	744	534	889	1234
Dclk2	683.274	0.483876	0.144231	3.35487	0.000794036	0.0184294	568	585	460	834	1089
2810408A11Rik	65.3992	0.95179	0.284276	3.34811	0.000813634	0.0188554	43	47	41	80	139
Klhl11	247.176	0.561475	0.16778	3.3465	0.000818393	0.0189367	180	193	197	285	438
Col1a1	94.9805	-0.853423	0.255088	-3.3456	0.000821046	0.0189563	104	127	88	55	97
Hcn3	44.4762	1.16191	0.347321	3.34537	0.000821742	0.0189563	27	24	30	77	75
Slc17a7	18.8886	1.76016	0.526327	3.34422	0.000825136	0.0190057	6	12	9	26	53
Sertad4	69.9024	-0.932566	0.279063	-3.34178	0.000832432	0.0190867	67	89	82	49	56
Brcc3	159.769	-0.704493	0.210796	-3.34206	0.000831584	0.0190867	126	195	203	111	162
Rap1b	550.603	-0.530966	0.158852	-3.34252	0.000830203	0.0190867	419	693	634	395	635
Rpl23a	478.992	0.509472	0.152503	3.34073	0.000835573	0.0191298	396	386	338	542	834
Med14	768.182	-0.464605	0.139099	-3.34009	0.000837498	0.019145	608	901	881	650	806
Cpn1	16.8489	1.85002	0.554033	3.33918	0.000840249	0.0191789	6	11	6	26	45
Igdcc4	142.08	-0.69299	0.207574	-3.33852	0.000842245	0.0191956	131	173	158	114	126
Tet3	137.076	-0.77697	0.232804	-3.33745	0.000845515	0.0192123	145	180	127	116	103
Gstp-ps	393.561	0.525787	0.157528	3.33774	0.00084463	0.0192123	321	337	259	476	652
Asb7	126.076	-0.709345	0.2128	-3.33338	0.00085797	0.0194661	119	157	136	90	124
Perp	104.472	-0.795612	0.238934	-3.32984	0.000868957	0.019686	92	126	129	79	89
Pmaip1	794.904	-0.506882	0.152495	-3.32393	0.000887586	0.020078	694	779	1003	607	886
Calm1	989.901	-0.400441	0.12049	-3.32345	0.000889125	0.0200828	875	1121	1025	888	1036
Mapk4	91.3161	-0.895474	0.269652	-3.32085	0.000897422	0.0201203	109	121	77	67	72
Glis2	408.714	-0.509795	0.15349	-3.32135	0.000895844	0.0201203	390	446	437	365	385
Srsf1	3356.54	-0.468104	0.140891	-3.32245	0.000892313	0.0201203	2461	4023	4002	2715	3673
Ssbp3	683.344	-0.422427	0.127182	-3.32143	0.00089559	0.0201203	643	732	713	596	722
Proca1	20.1123	1.72272	0.51874	3.32097	0.000897058	0.0201203	10	12	7	25	59
Klhl26	109.584	-0.771529	0.232476	-3.31874	0.000904237	0.0202133	123	131	106	76	104
Rpl38-ps1	482.481	0.566906	0.170811	3.3189	0.000903734	0.0202133	422	373	307	564	848
Gm8566	617.709	0.455376	0.137458	3.31284	0.000923541	0.0206144	456	601	428	723	1007
Fmr1	696.887	-0.508112	0.153489	-3.3104	0.000931616	0.0207641	519	844	833	548	756
Sox1	33.4918	-1.46057	0.441454	-3.30853	0.000937861	0.0208726	44	29	48	21	16
Cntrob	328.273	0.539047	0.163057	3.30588	0.000946788	0.0210404	213	283	272	351	611
Stag1	996.485	-0.387162	0.117262	-3.30168	0.000961063	0.0213263	865	1087	1079	833	1137
Bmpr1a	716.636	-0.414882	0.12575	-3.29927	0.00096937	0.0214478	611	839	751	570	836
Fam162a	232.695	0.599894	0.181816	3.29945	0.000968754	0.0214478	167	221	145	274	416
S100a13	30.4763	-1.47257	0.446516	-3.2979	0.000974103	0.0215211	42	45	25	17	17
Rnpc3	157.071	-0.788516	0.239264	-3.29559	0.000982157	0.0216046	111	224	192	128	123
Yipf6	166.683	-0.627709	0.190427	-3.29632	0.000979611	0.0216046	158	204	173	129	164
Zfp36l1	362.578	-0.55525	0.168469	-3.29587	0.00098119	0.0216046	354	392	393	330	317
Bcas3	447.518	0.456252	0.138481	3.2947	0.000985274	0.0216418	338	401	333	512	745
Arhgap45	182.508	0.63447	0.192638	3.29358	0.000989199	0.0216965	143	151	116	220	326
Sipa1l1	873.824	0.398332	0.121232	3.2857	0.00101729	0.0222483	638	845	657	1028	1360
Dppa3-ps	175.129	0.628828	0.191361	3.28608	0.00101593	0.0222483	101	151	146	214	309
Gm47939	268.554	-0.579845	0.176714	-3.28125	0.00103347	0.0225695	282	289	275	234	242
Tmem165	400.137	-0.539693	0.164556	-3.27969	0.00103921	0.0226298	310	467	489	325	408
Rpl5-ps2	822.377	0.403086	0.122903	3.27971	0.00103915	0.0226298	646	684	666	974	1274
Septin1	344.311	0.487661	0.148793	3.27744	0.00104753	0.0227782	236	322	261	429	540
Zbp1	31.5246	1.50112	0.458164	3.27639	0.00105145	0.0228306	8	19	24	33	94
Gm15484	995.882	0.41077	0.125392	3.27588	0.00105333	0.0228387	761	863	794	1052	1723
Ccdc117	457.076	0.618554	0.188914	3.27425	0.00105941	0.0229051	289	388	364	423	982
Ifi30	236.571	0.647775	0.197837	3.27429	0.00105927	0.0229051	188	214	128	291	419
Slc25a11	278.857	0.52305	0.159873	3.27167	0.00106915	0.0230827	212	235	205	323	480
Tmem184b	295.083	0.542855	0.165948	3.27124	0.00107078	0.023085	222	262	203	326	536
Trim25	940.256	0.42302	0.129337	3.2707	0.00107284	0.0230964	643	799	838	1017	1609
Coasy	152.632	0.720093	0.220282	3.26896	0.00107942	0.0232053	115	136	83	178	296
Slc38a2	2950.25	-0.382738	0.117184	-3.26612	0.0010903	0.023406	2454	3195	3324	2606	3192
Pfkm	250.572	0.582413	0.178446	3.26379	0.00109931	0.023566	184	220	172	269	477
Psap	790.437	0.396559	0.121607	3.26098	0.00111028	0.0237675	585	731	618	870	1308
Gm11826	380.916	0.589809	0.181015	3.25835	0.00112061	0.0239549	313	305	249	395	747
Stat2	237.154	0.569112	0.174721	3.25727	0.00112491	0.0240129	171	210	167	262	438
Pak4	472.73	0.44089	0.135574	3.25202	0.00114589	0.0244263	348	440	352	559	755
Meis1	43.2466	-1.18019	0.363023	-3.25101	0.00114994	0.0244782	43	54	57	18	41
Prss23	17.8807	-1.92564	0.592854	-3.24809	0.00116183	0.0246966	24	25	20	10	5
Rpgrip1l	138.852	0.773814	0.238343	3.24664	0.00116775	0.0247877	77	101	121	144	302
Has2	38.6561	-1.25492	0.386777	-3.24455	0.00117635	0.0249005	33	47	59	23	26
Psmb6	612.654	0.477788	0.147254	3.24464	0.00117597	0.0249005	478	472	499	652	1100
Rac1	702.019	-0.396907	0.122346	-3.24415	0.00117802	0.0249011	617	810	716	600	777
Gipc1	455.628	0.445264	0.137412	3.24035	0.00119382	0.0252	346	412	337	543	724
Zfp709	90.9009	-0.83672	0.258311	-3.23919	0.00119869	0.0252323	81	111	112	72	70
Plekha1	1254.69	-0.40121	0.123849	-3.23952	0.00119732	0.0252323	1021	1399	1419	1051	1411
Zscan5b	28.1251	1.34232	0.414912	3.23519	0.00121562	0.0255534	15	18	15	42	62
Gm14406	203.13	-0.653956	0.202232	-3.23369	0.00122201	0.0256091	158	231	269	147	208
Pou3f1	208.725	-0.65339	0.202094	-3.23309	0.00122458	0.0256091	220	191	255	144	222
Rfx7	807.9	-0.39775	0.123007	-3.23356	0.00122257	0.0256091	714	861	885	679	908
Crocc	483.521	0.455806	0.141003	3.23259	0.00122672	0.0256091	319	476	371	591	756
Treml2	41.4449	1.13186	0.35013	3.23268	0.00122635	0.0256091	25	24	28	54	92
Ccdc61	108.963	0.71673	0.221891	3.23011	0.00123744	0.0257974	74	83	81	142	191
Tmem123	342.792	-0.540606	0.167475	-3.22799	0.00124665	0.0259166	278	393	413	244	394
Chmp2a	263.4	0.538128	0.166712	3.22789	0.00124707	0.0259166	194	242	179	307	456
Txlnb	77.216	0.91196	0.28255	3.22761	0.00124829	0.0259166	38	53	67	90	167
Erbb3	687.206	0.394107	0.122139	3.22671	0.00125224	0.0259631	497	603	580	812	1061
Bin2	69.7307	0.940383	0.29152	3.22579	0.00125626	0.0260108	48	37	54	86	146
Dab1	93.3118	-0.859987	0.26664	-3.22528	0.00125852	0.0260196	90	94	127	72	72
Smg6	837.801	0.462645	0.14346	3.22491	0.00126012	0.0260196	581	652	766	900	1480
Gm20008	196.01	-0.74084	0.230021	-3.22075	0.00127857	0.0262663	139	224	285	127	204
Kat6b	2307.65	0.330034	0.102474	3.22065	0.001279	0.0262663	1733	2090	1936	2512	3680
Acly	2616.95	0.364031	0.113	3.22151	0.00127515	0.0262663	1967	2346	2146	2717	4454
Platr14	184.634	0.704745	0.218805	3.22088	0.00127796	0.0262663	92	136	180	227	340
Naf1	540.128	-0.472299	0.146704	-3.21941	0.00128455	0.0263397	428	625	630	431	597
Spdl1	264.164	0.582476	0.180945	3.21907	0.00128605	0.0263397	191	202	212	275	514
Gapdh-ps16	643.065	0.442953	0.137666	3.21759	0.00129273	0.0264408	511	583	450	794	983
Stac2	93.5593	0.794235	0.246956	3.2161	0.00129945	0.0265424	70	66	62	112	185
Miip	309.503	0.529122	0.164705	3.21255	0.00131561	0.0268364	252	256	212	359	534
Ggt1	31.1357	1.29897	0.404489	3.21139	0.00132094	0.0269089	16	16	22	42	73
Catsperg2	37.8597	1.20715	0.376017	3.21036	0.00132569	0.0269693	21	30	18	46	92
Fign	50.7065	-1.07693	0.335725	-3.20777	0.0013377	0.0271618	56	53	66	35	35
Ascc2	387.982	0.453482	0.14138	3.20754	0.00133874	0.0271618	267	341	324	453	633
Aftph	428.799	0.454642	0.14176	3.20712	0.00134072	0.0271657	306	385	339	469	742
Eif1ax	668.713	-0.450162	0.140391	-3.2065	0.00134362	0.0271765	532	764	776	548	735
Prr15l	21.8252	1.54989	0.483398	3.20624	0.00134484	0.0271765	12	14	8	31	55
Ppp1cb	1536.84	-0.476421	0.148622	-3.20559	0.00134788	0.0272016	1106	1999	1722	1254	1655
Cct4	3068.59	0.415545	0.129683	3.20431	0.00135384	0.0272857	2226	2816	2422	3034	5613
Zc3h12c	100.332	-0.771944	0.240941	-3.20387	0.00135593	0.0272915	97	112	121	77	86
Arih1	1175.04	-0.378816	0.118253	-3.20343	0.00135799	0.0272967	974	1339	1265	963	1377
Mov10	847.985	0.42371	0.132295	3.20277	0.00136111	0.0273232	649	822	586	997	1345
Mfhas1	52.9861	-1.01209	0.316401	-3.19877	0.00138016	0.027669	51	66	66	33	44
Tubg1	255.87	0.556859	0.174179	3.19704	0.00138845	0.0277984	189	222	182	275	479
Alkbh5	1160.19	0.48842	0.152891	3.19456	0.00140045	0.0280016	717	1147	913	1164	2198
Tgfb1i1	25.4384	-1.55397	0.486579	-3.19366	0.00140482	0.0280519	37	35	22	14	13
Cdc73	795.393	-0.448805	0.140578	-3.19257	0.00141013	0.028121	633	885	944	633	900
Mtmr3	633.471	0.461019	0.144437	3.19182	0.00141377	0.0281565	444	552	522	646	1164
Fabp3	452.323	0.506251	0.158679	3.19042	0.00142068	0.0282346	387	352	317	531	760
Tmem191c	47.7584	1.0714	0.335833	3.19027	0.00142142	0.0282346	28	42	22	64	101
Ptar1	563.526	-0.458505	0.143874	-3.18685	0.00143832	0.0284128	468	614	663	440	643
Gm15500	3770.08	0.326632	0.102489	3.18698	0.00143766	0.0284128	2982	3473	2951	4358	5655
Eif4a-ps4	5092.96	0.329672	0.103413	3.18793	0.00143294	0.0284128	3872	4677	4163	5363	8366
Rpl3-ps2	1644.39	0.362232	0.11367	3.18669	0.00143912	0.0284128	1306	1518	1233	1845	2609
Tnk1	108.299	0.766684	0.240599	3.18656	0.00143976	0.0284128	66	101	68	122	222
Paip1	293.029	-0.536863	0.168618	-3.18391	0.00145302	0.0286371	232	365	331	238	300
Ube2d1	107.933	-0.776084	0.243836	-3.18281	0.00145855	0.0286766	88	160	113	77	100
Klhl9	492.663	-0.430673	0.135314	-3.18276	0.0014588	0.0286766	423	590	506	404	551
Nmt1	1063.4	0.377773	0.118734	3.18168	0.00146426	0.0287465	794	950	870	1132	1788
Oas1a	101.963	0.73931	0.232773	3.1761	0.00149271	0.0292672	69	88	65	125	192
Tmc6	159.772	0.662387	0.208593	3.1755	0.00149578	0.0292894	91	123	144	186	300
Socs7	358.268	0.477013	0.150235	3.1751	0.00149783	0.0292918	234	345	279	413	602
Gm2027	100.07	-0.782031	0.24634	-3.1746	0.00150044	0.029305	89	110	132	68	96
Dcun1d1	130.38	-0.701398	0.221002	-3.17372	0.00150501	0.0293186	112	146	167	94	128
Zfyve26	503.266	0.422107	0.132992	3.17392	0.00150398	0.0293186	371	452	396	619	761
Arhgef5	80.5818	-0.869634	0.274506	-3.168	0.00153494	0.0298251	76	104	91	66	57
Hif1a	804.854	-0.429216	0.135481	-3.16808	0.00153448	0.0298251	659	896	922	703	844
Gm12816	793.267	0.395997	0.12504	3.16697	0.00154035	0.0298671	617	737	584	903	1272
Llgl2	577.63	0.43469	0.137263	3.16684	0.00154104	0.0298671	414	502	479	611	1014
Wdr1	744.688	-0.388467	0.12288	-3.16134	0.00157043	0.0303977	699	797	762	650	812
Hecw2	135.161	-0.691911	0.219059	-3.15856	0.0015855	0.0306504	120	169	151	114	113
A930024E05Rik	39.76	-1.14994	0.364126	-3.15808	0.00158812	0.0306618	40	56	45	22	32
Zfp69	51.1407	1.00656	0.318889	3.15646	0.00159698	0.0307936	30	43	28	65	109
4930522L14Rik	105.378	-0.843357	0.26731	-3.15498	0.00160509	0.0309107	70	149	139	73	94
Slc39a14	607.015	-0.48984	0.155378	-3.15256	0.00161843	0.0311106	650	605	615	543	581
Eif4g2	8839.05	-0.348376	0.110513	-3.15236	0.00161958	0.0311106	7528	9404	9701	8030	9577
Arhgap30	33.7592	1.24906	0.39636	3.15134	0.00162525	0.03118	19	20	21	39	86
Eml1	64.0805	-0.950534	0.301745	-3.15012	0.00163202	0.0312417	78	80	59	45	50
2410006H16Rik	443.37	0.525154	0.166714	3.15002	0.00163258	0.0312417	349	372	314	449	851
Cenpp	88.4267	-0.811266	0.257629	-3.14897	0.00163846	0.0313146	84	96	113	66	75
Prlr	39.6467	-1.17758	0.374107	-3.14771	0.00164556	0.0314106	39	46	55	26	26
Hdgfl3	98.972	-0.767387	0.243907	-3.14622	0.00165395	0.0314802	97	109	120	61	104
Tmem33	207.643	-0.596688	0.189631	-3.14657	0.00165196	0.0314802	175	226	261	161	210
Ndufb7	205.35	0.579864	0.18432	3.14596	0.00165543	0.0314802	148	178	145	285	305
Samd12	40.2415	-1.16644	0.370932	-3.14462	0.00166305	0.0315376	46	56	40	27	26
Fam102b	62.9086	-0.931507	0.29633	-3.14348	0.00166951	0.0315376	72	67	73	41	54
Pim2	214.261	-0.638072	0.202999	-3.14323	0.00167093	0.0315376	197	203	285	152	226
Cfl2	231.765	-0.625142	0.198876	-3.14338	0.00167009	0.0315376	175	299	277	150	267
Pcgf2	567.122	0.446582	0.142028	3.14432	0.00166475	0.0315376	465	485	407	637	953
Rfx2	326.837	0.478053	0.152055	3.14395	0.00166684	0.0315376	232	306	242	373	554
Gm6083	471.826	0.481196	0.15312	3.1426	0.00167456	0.0315668	353	448	323	508	842
Gm8172	1916.46	0.339863	0.108184	3.14152	0.00168075	0.0316441	1472	1831	1470	2148	2995
Myrf	600.272	0.442651	0.14105	3.13824	0.00169964	0.0319599	394	530	524	776	872
Zfp442	63.934	-0.963333	0.307241	-3.13543	0.00171604	0.0321885	50	95	77	35	62
Septin7	692.27	-0.477155	0.152168	-3.13571	0.00171441	0.0321885	531	781	847	574	733
Qk	1407.55	-0.391643	0.125024	-3.13255	0.00173295	0.0324656	1142	1546	1607	1208	1558
Atp6v0a4	31.6986	1.41046	0.450326	3.13208	0.00173573	0.0324773	11	32	11	39	84
Bhlha15	20.9003	1.52991	0.48855	3.13154	0.00173893	0.0324971	10	15	8	33	48
Trim35	298.44	-0.514354	0.16433	-3.13001	0.001748	0.0326265	303	303	321	250	301
Ccdc136	109.621	0.720128	0.230196	3.12832	0.00175808	0.032734	58	100	84	141	196
Acsf2	97.2516	0.766333	0.244966	3.12833	0.00175804	0.032734	64	62	82	122	182
Btaf1	1154.9	-0.424887	0.135952	-3.12528	0.00177638	0.0330342	902	1302	1355	923	1330
Abi1	380.585	-0.446328	0.142832	-3.12484	0.00177901	0.0330426	339	434	401	317	413
Gm7336	498.835	0.446514	0.143012	3.12221	0.001795	0.0332987	381	474	345	604	781
Magi3	205.858	-0.552822	0.177148	-3.12068	0.00180436	0.0334109	186	240	224	169	205
Brca1	1509.77	0.373596	0.119735	3.1202	0.00180729	0.0334109	1092	1383	1248	1560	2596
Slc38a10	613.308	0.426673	0.136748	3.12014	0.00180766	0.0334109	401	532	555	695	1010
Dusp4	137.148	-0.687506	0.220607	-3.11643	0.00183057	0.0336726	145	180	120	107	126
Aen	539.49	-0.443813	0.142412	-3.1164	0.00183071	0.0336726	498	553	604	473	555
Rpl19-ps7	693.619	0.414914	0.133134	3.11652	0.00182998	0.0336726	529	587	565	734	1201
Rpl19-ps6	237.899	0.545254	0.174962	3.11641	0.00183068	0.0336726	193	192	165	284	404
Plxnb1	419.382	-0.469318	0.150763	-3.11295	0.00185227	0.0340279	423	453	416	372	415
Plin3	371.912	0.454106	0.14594	3.1116	0.00186077	0.0341426	288	312	289	426	617
Igf2r	1337.05	0.334217	0.107426	3.11115	0.00186361	0.0341535	1008	1222	1103	1481	2104
Ptprg	843.192	-0.371259	0.119347	-3.11075	0.0018661	0.0341578	733	937	886	736	935
Chic2	225.54	-0.596411	0.191821	-3.1092	0.00187594	0.0342964	190	239	289	185	215
Adamts6	40.1494	-1.20459	0.387477	-3.10882	0.00187839	0.0342998	28	58	59	22	31
Acot1	126.491	0.736951	0.237245	3.10629	0.00189451	0.0345525	74	119	85	132	269
Naga	97.6168	0.741862	0.238916	3.10512	0.00190201	0.0346476	65	76	71	112	194
9630028I04Rik	44.302	1.24754	0.40189	3.10418	0.00190809	0.0347166	18	33	29	38	131
mt-Ti	34.9994	-1.34098	0.432628	-3.09961	0.00193775	0.035214	25	40	63	17	26
Nhs	76.7001	-0.857088	0.276613	-3.09851	0.00194497	0.0353029	78	90	88	62	56
Lgr4	1124.87	-0.408676	0.1321	-3.09368	0.00197689	0.0357539	879	1289	1287	939	1261
Mprip	1037.39	0.369716	0.119499	3.09389	0.00197549	0.0357539	734	995	838	1116	1720
Gm6992	551.65	0.463108	0.149671	3.09417	0.00197362	0.0357539	392	566	369	650	899
Gm47026	44.775	-1.15105	0.372325	-3.09153	0.00199126	0.0359709	35	79	47	29	31
Myh7b	23.9272	1.41641	0.458567	3.08876	0.00200991	0.0362645	16	12	11	39	50
Igfbp3	153.879	-0.616294	0.199557	-3.0883	0.00201302	0.0362775	133	197	165	117	156
H2bc18	690.048	-0.415428	0.13457	-3.08708	0.0020213	0.0363667	636	824	654	625	704
Marcksl1	1260.67	-0.35045	0.113529	-3.08687	0.00202277	0.0363667	1134	1418	1248	1143	1368
AW146154	51.529	-1.01015	0.327387	-3.0855	0.0020321	0.0364911	46	61	71	32	43
Lrfn4	127.312	-0.687994	0.22309	-3.08393	0.00204284	0.0366406	127	128	156	88	131
Tfap2c	517.615	0.436947	0.141733	3.08289	0.00205002	0.0367259	360	468	424	544	915
Flna	5359.75	-0.368279	0.119535	-3.08094	0.00206347	0.0368958	5232	5893	5044	5027	5482
Mrnip	56.0397	0.913473	0.296504	3.08081	0.00206437	0.0368958	34	41	39	76	107
Tcte2	19.5788	-1.72617	0.560783	-3.07814	0.00208298	0.0371846	26	29	20	4	16
Cpsf6	1699.57	-0.385589	0.125325	-3.07671	0.002093	0.0373194	1327	1985	1884	1464	1885
Git1	706.279	0.385946	0.125463	3.07616	0.00209683	0.0373439	559	620	548	794	1137
Nkrf	184.094	-0.576498	0.187457	-3.07535	0.00210255	0.0374016	159	212	214	145	187
Firre	1097.72	-0.411192	0.133782	-3.0736	0.00211492	0.0374897	1023	1221	1106	1040	1062
Ddx3x	4309.67	-0.383683	0.12483	-3.07365	0.00211457	0.0374897	3361	4781	5006	3623	4906
Gm9354	224.473	0.530748	0.172649	3.07414	0.00211111	0.0374897	166	201	158	259	390
Dock11	356.616	-0.498565	0.162269	-3.07246	0.002123	0.037589	291	459	370	310	352
Cdh2	90.9678	-0.784076	0.255484	-3.06898	0.00214792	0.0379554	99	92	107	68	79
Klf5	1740.5	-0.381969	0.12448	-3.06852	0.00215121	0.0379554	1472	2096	1741	1617	1779
Phrf1	1145.65	0.34251	0.111613	3.06871	0.00214982	0.0379554	879	999	964	1302	1769
Cpeb1	109.49	-0.69275	0.225929	-3.06622	0.00216781	0.0381808	102	129	125	80	107
Xrcc1	350.861	0.462397	0.15082	3.06588	0.00217031	0.0381808	267	317	255	395	595
N4bp3	212.059	0.551626	0.179934	3.06571	0.00217154	0.0381808	153	188	152	233	389
Ddx19b	1196.45	0.371456	0.121209	3.06458	0.00217975	0.0382807	796	1126	1040	1304	1964
Zfp280d	619.266	-0.45333	0.147968	-3.06371	0.00218611	0.0383479	484	697	739	511	674
Gm10769	205.138	-0.649155	0.211964	-3.06257	0.00219442	0.0384049	148	258	262	134	230
Dsp	814.067	-0.377853	0.123374	-3.06267	0.00219373	0.0384049	724	945	804	732	869
Rcn2	158.495	-0.594067	0.194188	-3.05923	0.00221906	0.0387465	158	185	161	117	168
Acbd4	78.5075	0.804589	0.262998	3.0593	0.00221858	0.0387465	51	53	62	95	155
Mbnl1	143.849	-0.647159	0.21163	-3.05798	0.00222836	0.0388642	118	170	177	109	142
Rhbdf2	246.309	0.551462	0.180467	3.05575	0.00224495	0.0391086	185	184	200	264	460
Gm5850	217.353	0.539839	0.176688	3.05533	0.00224813	0.0391191	170	186	149	258	370
Lasp1	1311.1	0.338277	0.11073	3.05496	0.00225091	0.0391224	1022	1190	1048	1441	2084
Pik3c2b	266.917	0.505147	0.165376	3.05454	0.00225408	0.0391327	187	259	186	319	442
Gm37494	264.303	-0.53888	0.176499	-3.05316	0.00226445	0.0392678	219	287	327	202	286
Yipf5	171.251	-0.597517	0.19581	-3.05152	0.00227686	0.0393929	148	192	206	136	169
Ttf2	777.412	0.377868	0.123816	3.05185	0.00227437	0.0393929	615	682	609	860	1263
Tubb2a-ps2	296.264	0.4689	0.15373	3.05016	0.00228722	0.0395269	216	258	233	337	500
Kbtbd8	169.445	-0.761311	0.249671	-3.04926	0.00229407	0.039555	102	248	219	121	159
Lgals3bp	17.9559	1.61481	0.529539	3.04947	0.00229248	0.039555	9	8	10	25	47
Arid2	1505.39	-0.348087	0.114222	-3.04745	0.00230793	0.0397488	1239	1706	1605	1309	1712
Pcyt2	172.412	0.578858	0.190072	3.04547	0.00232315	0.0399655	114	141	142	196	313
Lmo4	55.2888	-0.945853	0.310674	-3.04451	0.00233056	0.0400036	53	68	68	32	52
Tceal8	208.667	-0.607255	0.199479	-3.04421	0.00233292	0.0400036	166	236	266	175	192
Aurkb	480.385	0.481725	0.158263	3.04382	0.00233592	0.0400036	391	411	335	505	873
Gm12758	27.1732	1.38522	0.455081	3.04389	0.00233538	0.0400036	13	19	14	28	78
Wdr34	140.608	0.639512	0.210167	3.04288	0.00234327	0.0400841	97	116	104	153	274
Nbr1	1197.91	0.408515	0.13432	3.04136	0.00235509	0.0401956	833	1066	1023	1203	2155
Nat9	27.0923	1.30798	0.430062	3.04137	0.00235505	0.0401956	12	15	20	38	62
Eif3d	1521.77	0.351992	0.115776	3.04029	0.00236351	0.0402939	1233	1386	1143	1744	2347
1810026B05Rik	153.694	-0.708877	0.23323	-3.03939	0.00237057	0.040369	121	160	221	106	156
Fam114a2	354.172	0.523804	0.172416	3.03802	0.00238135	0.0405069	225	345	267	362	676
Ptpn9	88.3321	-0.768983	0.253155	-3.0376	0.00238469	0.0405184	83	122	88	64	81
Hmmr	1422.79	0.38721	0.127525	3.03633	0.00239476	0.0406438	990	1256	1247	1459	2484
Taf1d	1133.54	-0.490662	0.161661	-3.03513	0.00240435	0.0407154	871	1175	1490	953	1166
Srsf10	1164.7	-0.408863	0.134706	-3.03521	0.00240365	0.0407154	905	1319	1353	947	1339
Ube3a	1406.35	-0.471843	0.155494	-3.03448	0.00240952	0.0407574	1028	1569	1789	1124	1552
Flt1	66.3039	-0.894457	0.294865	-3.03345	0.00241778	0.040806	64	100	62	42	61
Bsdc1	210.983	0.542666	0.178884	3.03362	0.00241641	0.040806	166	161	161	250	360
Zfp334	149.447	-0.623616	0.205628	-3.03273	0.00242349	0.0408361	147	171	159	127	133
2310057M21Rik	178.78	-0.582929	0.192224	-3.03255	0.00242494	0.0408361	179	184	202	129	195
Wnt3	18.216	-1.69732	0.560222	-3.02973	0.00244775	0.0411673	18	31	21	9	9
Fads1	445.814	0.460113	0.151897	3.02911	0.00245276	0.0411673	343	392	331	465	804
Psme2b	220.423	0.577664	0.190689	3.02935	0.00245081	0.0411673	177	159	167	240	413
Gpx4	525.717	0.437455	0.144459	3.02823	0.0024599	0.0412415	433	442	386	582	889
Etf1	3094.75	-0.356366	0.117802	-3.02514	0.00248518	0.0415883	2481	3422	3469	2706	3471
Gm9294	660.82	0.395581	0.130769	3.02503	0.00248608	0.0415883	501	636	481	752	1060
Gmfb	536.447	-0.482624	0.159628	-3.02343	0.00249925	0.0416023	401	637	642	408	614
Eif3j1	500.971	-0.467504	0.154635	-3.02326	0.00250064	0.0416023	382	591	589	400	556
Cdc5l	575.452	0.40312	0.133304	3.02407	0.00249401	0.0416023	412	477	512	662	918
Fbf1	224.44	0.509273	0.168441	3.02345	0.00249906	0.0416023	166	195	167	266	375
Gm8112	90.7729	0.774425	0.256068	3.02429	0.00249216	0.0416023	74	67	52	115	169
0610010F05Rik	148.97	-0.611995	0.20251	-3.02205	0.0025107	0.0417239	128	192	159	113	152
Ubald2	376.539	0.453356	0.150287	3.0166	0.00255626	0.0424345	301	322	277	424	634
Sorbs1	314.757	0.463165	0.153559	3.0162	0.00255968	0.0424448	224	282	248	347	544
Epb41l4a	460.731	-0.487603	0.161688	-3.01569	0.00256393	0.0424687	419	567	450	433	416
Dnm1l	1078.76	-0.367297	0.121814	-3.01524	0.00256778	0.0424862	895	1215	1165	866	1301
Ndc1	680.072	-0.406082	0.134796	-3.01256	0.00259054	0.0427693	585	747	748	516	832
Plcg2	788.74	0.391988	0.13011	3.01274	0.00258904	0.0427693	596	638	689	863	1307
Nelfe	273.652	0.479736	0.159325	3.01105	0.00260344	0.0429354	209	222	217	327	444
Gm43362	78.9052	-0.797838	0.265059	-3.01004	0.00261209	0.0430314	68	99	96	55	73
Gm6652	43.8462	1.02614	0.341215	3.00731	0.00263572	0.0433734	31	31	23	58	91
Anxa3	78.0185	-0.808744	0.269031	-3.00614	0.00264585	0.0434116	82	104	74	49	78
Gm7265	119.799	-0.72277	0.240421	-3.00627	0.00264474	0.0434116	87	167	143	83	120
Cmklr1	86.6624	0.740731	0.246413	3.00605	0.00264663	0.0434116	54	77	58	112	156
Jph4	46.1371	-1.01891	0.339113	-3.00464	0.00265892	0.0435661	49	60	50	32	34
Zfhx4	23.0731	-1.49125	0.496459	-3.00377	0.00266654	0.0436177	18	38	31	11	15
Cpe	45.5238	-1.06351	0.354075	-3.00363	0.00266783	0.0436177	55	64	39	29	35
Kdm5b	5118.88	0.291723	0.0971868	3.00167	0.00268501	0.0438512	3896	4908	4144	5575	7935
Gtf2ird1	480.933	0.395827	0.131912	3.0007	0.00269362	0.0439446	347	431	398	565	748
Dennd1b	387.784	-0.457448	0.152512	-2.99942	0.00270498	0.0440824	322	440	439	335	401
Zfp422	81.7335	-0.780553	0.260286	-2.99882	0.00271024	0.0441004	84	88	97	55	79
Xpo4	1347.6	-0.373559	0.124576	-2.99864	0.0027119	0.0441004	1070	1526	1506	1144	1534
Mpdz	245.762	-0.505004	0.168632	-2.99471	0.00274703	0.0446239	210	285	275	188	274
Tmpo	1654.98	-0.368627	0.123275	-2.99028	0.00278726	0.0452189	1307	1881	1845	1438	1848
Gstp2	197.664	0.578612	0.193536	2.98969	0.00279262	0.0452189	145	188	123	224	360
Gm29719	27.2975	1.3055	0.436652	2.98979	0.00279166	0.0452189	13	12	22	43	56
Fam3c	654.546	-0.403949	0.135132	-2.9893	0.00279621	0.0452288	554	759	690	595	673
Gm7292	158.172	-0.586746	0.19633	-2.98857	0.00280284	0.045246	140	184	180	116	170
Plekhg5	333.221	0.448593	0.150112	2.98839	0.00280447	0.045246	250	272	276	386	545
Rnf19b	239.116	0.501702	0.167894	2.9882	0.00280623	0.045246	163	201	201	271	414
Gm6035	630.574	0.382744	0.128119	2.98742	0.00281344	0.045314	467	584	499	683	1048
Man2a1	371.427	-0.468178	0.15682	-2.98545	0.00283159	0.0455097	292	458	409	299	409
Kat7	1592.17	0.328468	0.110017	2.98563	0.00282998	0.0455097	1167	1495	1322	1694	2589
B930086L07Rik	552.402	-0.402446	0.134903	-2.98322	0.00285229	0.0457938	500	572	609	465	617
Tubg2	48.9266	1.022	0.34283	2.98108	0.00287238	0.0460675	22	44	31	55	115
Impdh2-ps	1993.61	0.335791	0.112683	2.97997	0.00288281	0.0461859	1621	1753	1574	2166	3197
Eid1	67.5036	-0.879672	0.295327	-2.97864	0.0028953	0.04622	61	78	88	53	50
Nipa2	214.822	-0.528273	0.177385	-2.97812	0.00290019	0.04622	187	239	249	167	231
Ppp1r10	526.495	-0.478277	0.160569	-2.97864	0.00289529	0.04622	523	529	570	491	484
Slc44a1	555.017	-0.40332	0.135416	-2.97839	0.00289768	0.04622	456	667	580	460	630
Spag9	739.278	0.448748	0.150625	2.97923	0.00288972	0.04622	495	676	613	727	1385
Slc40a1	94.7684	-0.762323	0.256035	-2.97742	0.00290687	0.0462779	75	138	103	70	86
Rbfaos	103.518	-0.762597	0.256224	-2.97629	0.00291761	0.0464001	92	112	136	87	80
Eef1g	3892.68	0.318859	0.107195	2.97457	0.002934	0.0466119	3130	3579	3020	4581	5694
Frmd5	87.3229	-0.808152	0.271727	-2.97413	0.00293818	0.0466294	88	116	86	75	62
Dock3	101.565	-0.733884	0.247052	-2.97056	0.00297259	0.0471262	104	105	121	83	84
Gm10566	188.543	0.539372	0.181625	2.96969	0.00298097	0.0472096	135	173	132	234	308
Ogdh	962.036	0.382201	0.128718	2.9693	0.00298478	0.0472206	722	833	804	990	1668
Cdk11b	758.996	0.361238	0.121681	2.96874	0.00299025	0.0472509	577	653	641	895	1145
Gm8129	928.159	0.419288	0.141248	2.96846	0.00299293	0.0472509	760	852	634	1000	1589
Lonp1	925.43	0.339833	0.114542	2.96689	0.00300824	0.0474432	681	872	754	1030	1456
Cd44	21.0422	-1.52433	0.514261	-2.96411	0.00303556	0.0478243	22	35	22	11	12
Dcaf4	327.446	0.451765	0.152453	2.9633	0.00304357	0.0479007	258	276	249	376	541
Kars	2295.42	0.328005	0.110711	2.96272	0.00304938	0.0479423	1864	2059	1792	2499	3654
Txnl4a	211.464	-0.542719	0.183338	-2.96022	0.00307423	0.0482829	219	245	199	180	204
Plcg1	929.667	0.353263	0.11936	2.95966	0.00307979	0.0483202	740	846	713	1052	1453
Spag7	251.29	0.487881	0.164875	2.9591	0.00308536	0.0483575	194	201	198	301	409
Psip1	1227.11	-0.339874	0.114933	-2.95716	0.00310492	0.0486138	1034	1350	1311	1076	1394
Eif5	2245.95	-0.383244	0.129639	-2.95624	0.00311414	0.0487078	1752	2462	2634	1903	2538
Topors	824.514	-0.375556	0.127052	-2.95592	0.00311736	0.0487079	727	854	914	719	911
Hps1	128.733	0.611279	0.206824	2.95554	0.00312117	0.0487173	88	112	93	162	218
Slc6a15	118.849	-0.770439	0.260883	-2.95319	0.00314505	0.0489891	95	126	171	99	92
Gpc4	343.271	-0.500562	0.169481	-2.9535	0.00314196	0.0489891	337	410	322	317	313
Gm43481	140.193	-0.616447	0.20883	-2.9519	0.00315826	0.0490766	124	167	158	116	130
Mbtps2	324.122	-0.506942	0.171746	-2.95169	0.00316038	0.0490766	243	398	380	262	343
Kif3a	204.156	0.564255	0.191139	2.95206	0.00315664	0.0490766	142	165	165	211	395
Lzts1	33.3523	-1.18759	0.402488	-2.95061	0.00317143	0.0491977	29	44	46	20	24
Myo15b	43.4658	1.06052	0.359581	2.94933	0.00318465	0.0493523	19	41	25	52	100
Arap2	207.792	-0.521728	0.176936	-2.94868	0.00319136	0.0494058	196	224	230	158	229
Gm10231	252.241	0.49586	0.168201	2.94802	0.00319817	0.0494607	188	236	173	311	402
C530008M17Rik	124.581	-0.666056	0.225985	-2.94735	0.0032051	0.0495173	133	131	135	104	108
Clybl	92.1518	0.731657	0.248365	2.9459	0.00322017	0.0496994	66	82	53	115	170
Vbp1	366.737	-0.511406	0.173719	-2.94388	0.00324128	0.0499237	265	465	429	293	391
Pdzk1	42.1061	1.04895	0.356312	2.9439	0.00324106	0.0499237	24	39	19	58	86
Mybl2	2901.11	0.305281	0.103717	2.9434	0.0032463	0.0499501	2324	2655	2303	3303	4348
Smim10l1	35.8624	-1.14592	0.389609	-2.9412	0.00326945	0.0499811	32	44	51	19	30
Ctdspl	63.0721	-0.915118	0.311033	-2.94219	0.003259	0.0499811	46	95	76	44	52
Casd1	66.1387	-0.847935	0.288203	-2.94214	0.00325948	0.0499811	64	79	78	51	52
Ptp4a1	360.846	-0.480533	0.163298	-2.94268	0.00325384	0.0499811	305	377	439	276	411
Rtn3	873.268	-0.385038	0.130912	-2.9412	0.00326944	0.0499811	719	1070	880	786	925
Npc1	701.964	0.409815	0.139345	2.94101	0.00327139	0.0499811	500	684	532	727	1234
Xylt2	214.416	0.522077	0.177469	2.9418	0.00326315	0.0499811	150	179	174	234	388

## Sheet: sig_genes_rescue_RNAseq
Gene_Identifier	baseMean	log2FoldChange	lfcSE	stat	pvalue	padj	rmce_input_aligned.bam	wt20_input_aligned.bam	wt44_input_aligned.bam	dko4_input_aligned.bam	dko13_input_aligned.bam	fl_1_Aligned_filteredsq30.out.sam	fl_2_Aligned_filteredsq30.out.sam	dd3del_1_Aligned_filteredsq30.out.sam	dd3del_2_Aligned_filteredsq30.out.sam	gfp_1_Aligned_filteredsq30.out.sam	gfp_2_Aligned_filteredsq30.out.sam
Safb	461.067	-5.54209	0.282757	-19.6002	1.54052e-85	2.33481e-81	694	837	554	17	21	793	591	4299	4478	9	13
Prtg	835.948	-1.2247	0.122265	-10.0167	1.28698e-23	9.75277e-20	879	1116	992	488	590	994	1206	307	503	445	492
Upp1	847.898	1.40146	0.163462	8.5736	1.00296e-17	5.06694e-14	351	613	462	1135	2105	3302	3260	3369	4918	4847	4693
Pnma5	133.39	1.90748	0.235909	8.08566	6.18267e-16	2.34261e-12	53	60	62	191	382	475	578	670	897	691	785
Pecam1	809.433	1.17985	0.147597	7.99372	1.30928e-15	3.96868e-12	419	584	484	1019	1898	1553	1820	2065	2856	2263	2532
Pfkp	1671.42	1.15459	0.144973	7.96416	1.66346e-15	4.20191e-12	818	1371	933	2245	3684	2837	4016	4409	6047	5321	5707
Thbs1	223.573	-1.70246	0.220229	-7.73043	1.07181e-14	2.32062e-11	329	264	245	106	113	238	365	50	30	85	75
Ntn1	280.531	-1.679	0.218484	-7.68479	1.5325e-14	2.90331e-11	402	380	272	144	132	290	350	292	193	379	219
Sema6a	274.295	-1.38057	0.183449	-7.52567	5.24526e-14	8.83302e-11	302	332	363	162	159	457	444	63	98	69	68
Plagl1	195.632	-1.8769	0.250137	-7.50347	6.21511e-14	9.41962e-11	152	297	320	87	86	242	304	280	287	356	278
Lrp2	1425.84	-1.05934	0.14161	-7.4807	7.393e-14	1.01862e-10	1693	1632	1589	966	1020	1958	2612	783	1050	1038	1085
Cdk6	464.837	-1.24167	0.167708	-7.40377	1.32369e-13	1.67182e-10	437	577	652	286	303	651	779	503	483	562	447
Cd24a	427.42	-1.19089	0.161721	-7.36383	1.78705e-13	2.08342e-10	459	552	504	283	270	650	640	270	299	307	275
Adgre5	345.129	1.12213	0.15474	7.25172	4.11515e-13	4.45495e-10	188	233	226	462	749	476	685	854	1078	1082	955
Adgrl2	967.958	-0.897804	0.124481	-7.2124	5.49758e-13	5.55476e-10	967	1263	1047	688	788	906	1021	492	593	548	639
Fgf5	98.5951	-1.97638	0.277439	-7.12364	1.0511e-12	9.95658e-10	98	143	147	44	38	139	188	19	32	47	23
Spred1	499.812	-1.10064	0.1549	-7.10549	1.19895e-12	1.00951e-09	460	626	668	318	369	1017	1011	678	781	869	840
Acsl3	441.263	-1.05181	0.147912	-7.11103	1.15179e-12	1.00951e-09	462	592	482	240	396	573	816	498	695	500	628
Enpp2	83.2577	-2.14245	0.305722	-7.00785	2.42008e-12	1.93046e-09	88	105	138	32	31	161	189	41	67	56	79
Ppfia4	237.371	1.38417	0.199545	6.93661	4.01616e-12	3.04344e-09	128	151	119	298	610	491	455	558	769	535	704
Gm37899	821.966	-0.95032	0.141909	-6.69669	2.13197e-11	1.46873e-08	755	997	1057	575	643	1953	1580	844	859	957	769
Ndrg1	138.195	1.65233	0.246576	6.70109	2.06869e-11	1.46873e-08	58	92	57	180	386	218	275	274	427	484	448
Notch4	128.914	1.42854	0.214825	6.64981	2.93468e-11	1.93383e-08	57	88	68	203	283	222	216	379	346	475	313
Ccnd1	646.74	-1.05673	0.161366	-6.54865	5.80601e-11	3.66649e-08	670	768	802	468	426	1485	1101	1027	837	1177	793
Kctd12b	95.44	-1.82956	0.279866	-6.53727	6.2652e-11	3.78753e-08	87	139	145	44	43	212	163	54	60	46	54
Gja1	911.306	-0.881673	0.134981	-6.53182	6.49747e-11	3.78753e-08	813	1111	1156	631	777	2783	2273	1121	1565	1585	1688
Fndc3c1	166.066	-1.29862	0.202835	-6.40237	1.52982e-10	8.58737e-08	163	247	194	86	122	249	214	34	71	59	54
Prrc1	451.188	1.16094	0.182279	6.36901	1.90255e-10	1.02982e-07	235	274	322	532	1096	1946	1757	1549	2104	1827	1993
Safb2	336.842	-5.21447	0.820383	-6.35614	2.06884e-10	1.08122e-07	523	606	387	4	34	35	31	26	32	39	34
Colec12	125.181	-1.41759	0.223357	-6.34675	2.19906e-10	1.11097e-07	132	178	151	64	82	97	127	73	106	83	88
Cdyl2	365.676	0.962106	0.152921	6.29153	3.1436e-10	1.53692e-07	215	292	226	473	750	661	723	1043	1338	1178	1255
Hk1	343.759	1.11554	0.180201	6.19055	5.99529e-10	2.83952e-07	205	258	184	416	803	561	774	646	1107	804	989
Lpp	670.1	-0.77688	0.127094	-6.11265	9.79901e-10	4.50042e-07	641	844	733	492	599	959	1125	402	478	428	495
Dstn	1229.97	-0.684914	0.113552	-6.03171	1.62237e-09	7.23196e-07	1125	1553	1328	882	1233	2304	2458	1828	2128	2249	2121
Zfp710	1195.3	0.66948	0.111386	6.01046	1.84999e-09	8.011e-07	756	1013	901	1504	2105	2336	2323	1856	2352	2145	2156
Fstl1	763.761	-0.817091	0.137492	-5.94282	2.80153e-09	1.17944e-06	851	863	811	563	650	985	1283	590	889	799	978
Dusp6	297.908	-0.994709	0.168058	-5.91886	3.24181e-09	1.32791e-06	304	350	367	207	224	647	710	375	419	491	465
Tmem47	206.07	-1.38862	0.23716	-5.85522	4.76373e-09	1.89998e-06	158	309	296	126	113	426	548	273	326	251	305
Rbms1	532.36	-0.762064	0.130885	-5.82239	5.80132e-09	2.25448e-06	526	631	595	380	497	775	894	443	564	560	552
Dock6	1710.05	0.739351	0.128323	5.76162	8.33097e-09	3.15661e-06	1127	1552	1051	2252	3015	1810	2144	2023	2633	2500	2491
Rbm44	71.0489	2.00502	0.349229	5.74129	9.39564e-09	3.47318e-06	24	28	37	78	242	282	387	638	841	579	710
Sema3e	243.369	-1.01762	0.177904	-5.72004	1.06502e-08	3.8432e-06	257	325	258	168	180	335	433	129	187	197	165
Mep1b	132.653	1.29263	0.226545	5.70584	1.15773e-08	4.08059e-06	52	87	94	193	293	328	537	649	747	993	836
Fmnl2	481.881	-0.821831	0.146127	-5.62409	1.86483e-08	6.4235e-06	470	576	558	366	395	814	873	618	735	696	707
Ube2o	814.42	0.794711	0.141428	5.61918	1.91863e-08	6.46196e-06	487	650	602	932	1677	1794	1892	1688	2255	1856	2016
Lpar4	93.8537	-1.60493	0.287715	-5.57817	2.43056e-08	7.36753e-06	84	112	158	41	58	330	314	147	192	210	201
B830012L14Rik	934.49	-0.811635	0.145393	-5.58237	2.37261e-08	7.36753e-06	833	1102	1178	718	762	2521	2055	1053	1001	1197	978
Rian	4626.68	-0.596094	0.106857	-5.57845	2.42674e-08	7.36753e-06	4093	5324	5343	3578	4688	11278	9820	5359	6604	6089	6874
Gpi1	1208.51	0.844131	0.151291	5.57952	2.41189e-08	7.36753e-06	746	1079	716	1409	2524	2761	3132	2445	3618	3350	3527
Rhox5	346.581	0.926545	0.166056	5.57972	2.4091e-08	7.36753e-06	232	212	252	449	694	1650	1786	2370	3170	2425	2780
Ccn1	448.244	-0.857118	0.153872	-5.57035	2.54231e-08	7.55514e-06	519	486	485	299	406	662	914	201	263	308	294
Grhl3	204.019	1.0111	0.182219	5.54883	2.87582e-08	8.38192e-06	113	167	122	276	414	370	296	398	541	443	397
Fat3	31.322	-2.71669	0.49074	-5.53591	3.09617e-08	8.77492e-06	41	43	46	6	11	34	38	27	30	14	16
Gnasas1	346.316	-0.889664	0.160757	-5.5342	3.12646e-08	8.77492e-06	313	425	435	212	329	640	602	446	435	489	428
Nid1	554.907	0.742796	0.134691	5.51482	3.49128e-08	9.44889e-06	386	432	383	681	1046	734	1472	1690	1968	1852	1863
Rad50	1063.16	0.827429	0.150002	5.51613	3.46538e-08	9.44889e-06	615	768	854	1215	2232	3052	3275	3076	4044	3415	3601
Tpm1	1532.84	-0.771951	0.140075	-5.51097	3.56868e-08	9.48892e-06	1651	1969	1433	1193	1284	1707	2348	979	1277	1207	1207
Ahnak	4732.49	-0.671695	0.122468	-5.48466	4.14268e-08	1.08252e-05	4937	5850	4504	3789	4270	3115	5294	3586	3990	4437	4106
Atrnl1	143.59	-1.13316	0.207231	-5.46813	4.54805e-08	1.16831e-05	160	180	164	82	114	185	202	126	135	133	123
Ezh1	353.635	0.965471	0.176908	5.45747	4.8297e-08	1.21998e-05	234	260	210	408	792	689	807	563	769	676	762
Zfp608	157.311	-1.23084	0.22609	-5.44403	5.20881e-08	1.29417e-05	163	179	217	104	95	229	217	20	58	45	63
Wls	58.172	-1.85112	0.340429	-5.43761	5.40004e-08	1.2991e-05	85	67	70	22	31	35	109	23	49	42	46
Tagln	335.172	-1.08652	0.199788	-5.43838	5.37662e-08	1.2991e-05	435	435	291	223	238	318	539	24	59	49	68
Amot	181.89	-1.02873	0.189865	-5.41821	6.01976e-08	1.42555e-05	172	245	215	113	149	402	425	156	239	244	261
Kcnq1ot1	4680.03	-0.719569	0.133936	-5.37246	7.76687e-08	1.78355e-05	4001	5496	5841	3714	4052	8354	8405	8680	6654	10144	5607
Cpt1a	249.335	1.02853	0.191427	5.37296	7.74529e-08	1.78355e-05	178	161	142	311	544	281	477	495	731	521	726
Mfge8	517.299	0.900209	0.167953	5.35988	8.32751e-08	1.88376e-05	343	447	271	650	1050	927	1036	1603	1953	1955	1844
Tpm4	752.026	-0.686843	0.12869	-5.33719	9.43986e-08	2.10398e-05	697	933	816	593	682	1246	1336	717	1027	844	977
Cyyr1	120.66	-1.26893	0.238286	-5.32522	1.0083e-07	2.21476e-05	145	132	152	72	79	176	196	59	57	58	66
Xlr3b	17.0986	3.93086	0.741106	5.30405	1.13264e-07	2.45232e-05	3	1	3	24	72	21	16	37	43	44	43
Gli3	348.686	-0.783829	0.148238	-5.28763	1.23912e-07	2.64509e-05	349	428	376	251	316	553	539	338	344	357	338
Adgrv1	305.079	-0.822262	0.156153	-5.26574	1.39626e-07	2.89887e-05	315	382	319	214	273	463	402	266	299	339	276
Irs2	436.715	-0.792047	0.150397	-5.26639	1.39134e-07	2.89887e-05	446	498	497	336	364	384	543	200	240	238	217
Akap1	1311.5	0.618483	0.117612	5.25866	1.4511e-07	2.97202e-05	902	1067	1003	1510	2419	2882	2746	2690	3124	3168	2906
Mme	594.957	-0.758168	0.144262	-5.25549	1.47629e-07	2.98329e-05	540	734	689	469	500	806	1188	1121	1086	1261	994
Tasor	1666.9	-0.772124	0.147096	-5.24912	1.52827e-07	3.04769e-05	1298	2149	2105	1218	1503	3769	4059	4104	4723	4973	4643
Ftx	151.996	-1.14899	0.219255	-5.24045	1.60182e-07	3.15288e-05	158	165	211	81	126	262	257	99	112	105	116
Grip1	86.6966	-1.55957	0.299398	-5.20902	1.89842e-07	3.68878e-05	104	125	94	55	35	64	98	27	25	37	37
Samd4	59.3588	-1.69361	0.32653	-5.1867	2.14052e-07	4.10656e-05	67	81	77	32	26	68	99	20	23	20	26
Vgll3	54.4211	-1.75496	0.338983	-5.17713	2.25325e-07	4.21998e-05	58	69	81	25	27	103	158	84	76	96	87
Zfp280c	301.624	-0.926368	0.178941	-5.17696	2.25533e-07	4.21998e-05	249	381	401	201	256	847	743	513	662	658	694
Serp1	413.74	-0.878085	0.170177	-5.15984	2.47159e-07	4.56823e-05	338	506	557	280	363	1292	1330	1252	1321	1533	1158
H2az1	473.429	-0.915765	0.178688	-5.12494	2.97628e-07	5.43476e-05	359	619	643	317	404	729	646	722	627	741	608
Uggt2	120.059	-1.13346	0.222741	-5.08871	3.60516e-07	6.50475e-05	119	162	143	69	95	199	166	95	137	108	105
Lama3	216.438	0.975159	0.191942	5.08048	3.76486e-07	6.6887e-05	120	163	149	253	483	639	838	941	1177	1146	1132
Slc15a2	51.095	1.64867	0.324608	5.07894	3.79538e-07	6.6887e-05	19	26	31	87	115	72	138	105	165	76	134
Cul1	656.619	-0.729968	0.143811	-5.07587	3.85731e-07	6.71971e-05	609	841	706	532	550	1304	1155	1241	1290	1485	1186
Aire	138.057	1.30149	0.257617	5.05203	4.37138e-07	7.52871e-05	62	127	55	194	316	258	280	359	539	567	522
Slc5a5	122.018	-1.14503	0.227176	-5.0403	4.64812e-07	7.87753e-05	111	170	152	73	92	196	245	118	96	181	118
Atp1a3	195.269	0.957105	0.190007	5.03722	4.72345e-07	7.87753e-05	124	125	140	246	407	547	527	399	725	557	753
Ddx60	41.768	2.24156	0.445022	5.03696	4.72984e-07	7.87753e-05	11	22	14	41	158	157	200	114	239	161	247
Krt8	198.67	-1.00503	0.200134	-5.0218	5.11883e-07	8.43271e-05	216	285	186	112	181	176	391	74	145	102	132
Sulf1	545.774	-0.812397	0.162149	-5.01019	5.43754e-07	8.73087e-05	530	639	643	446	410	925	1043	533	655	695	653
Gm2999	577.004	0.643094	0.128389	5.00896	5.47264e-07	8.73087e-05	375	475	448	757	957	465	559	463	647	567	662
Acp5	46.5677	1.75984	0.351325	5.00915	5.46722e-07	8.73087e-05	27	21	17	72	119	103	96	198	246	332	275
Tmx3	404.459	-0.776555	0.155334	-4.99927	5.75488e-07	9.08551e-05	348	491	503	273	393	1188	1343	1115	1340	1406	1270
Cnr1	99.9242	-1.25644	0.251688	-4.99204	5.9745e-07	9.33499e-05	99	123	136	61	65	162	149	17	31	26	36
Neto2	77.2009	-1.44345	0.289528	-4.98554	6.17894e-07	9.45939e-05	83	85	115	37	52	353	283	324	237	367	202
Spire2	130.227	1.05656	0.21192	4.98565	6.17552e-07	9.45939e-05	76	96	79	172	276	222	269	258	398	302	391
Mipol1	86.4988	-1.36066	0.273149	-4.98139	6.31278e-07	9.56765e-05	100	133	83	46	58	112	172	49	92	51	104
Nsd2	987.905	-0.566507	0.114028	-4.96815	6.75944e-07	0.000101432	962	1129	1031	747	1052	1266	1412	797	1100	890	957
Marcks	381.826	-0.875633	0.176536	-4.96008	7.04624e-07	0.000104699	308	500	487	283	304	921	953	554	723	605	740
Lin28b	327.003	-0.778974	0.157128	-4.95756	7.13833e-07	0.000105037	299	386	397	233	301	919	848	556	681	659	634
Rnf217	69.1152	-1.52488	0.307874	-4.95293	7.31051e-07	0.000106537	78	100	79	42	32	102	96	50	46	60	51
Mt2	1335.27	0.59061	0.119329	4.94944	7.44269e-07	0.00010743	955	1158	945	1538	2419	7994	9233	7057	10093	7113	9435
Gm2a	275.381	0.950338	0.192158	4.94562	7.59028e-07	0.000108527	157	237	163	314	618	466	644	584	905	755	886
Cask	287.36	-0.798521	0.161748	-4.93683	7.94009e-07	0.000112467	283	355	315	216	245	329	429	340	363	362	355
Inpp5d	763.963	0.736973	0.149851	4.91805	8.7411e-07	0.000122667	500	667	500	846	1560	1363	1725	1534	2193	1723	2133
Vmn1r90	24.9908	-2.66794	0.542845	-4.91474	8.89011e-07	0.000123613	33	41	30	5	9	36	18	25	18	26	18
Ints6	657.149	-0.742298	0.151356	-4.90432	9.37498e-07	0.00012917	599	703	850	496	590	1467	1462	1643	1333	2111	1328
Gpi-ps	1021.7	0.752943	0.154089	4.88643	1.0268e-06	0.000140199	646	978	602	1218	1990	958	1129	854	1309	1211	1252
Thsd7a	43.1621	-1.90779	0.390605	-4.88418	1.03863e-06	0.000140548	50	56	61	22	15	15	36	5	9	4	11
Aldoa	4841.01	0.721614	0.147876	4.87987	1.06158e-06	0.000142383	3173	4721	2769	5969	8984	9319	11230	9209	15433	11913	15617
Col4a2	169.256	-0.975651	0.200209	-4.87317	1.09824e-06	0.000146008	185	222	172	117	131	165	367	90	140	121	189
Acp6	335.102	0.791942	0.162865	4.86258	1.15868e-06	0.000152704	203	304	212	415	647	519	713	954	1238	1295	1193
Spta1	350.529	-0.956537	0.196978	-4.85606	1.19745e-06	0.000153988	365	415	412	286	219	727	670	729	842	1065	866
Amotl2	533.657	-0.745536	0.153452	-4.85844	1.18314e-06	0.000153988	591	547	597	405	474	1014	1156	476	576	680	593
Hrob	368.947	0.712748	0.146782	4.85582	1.19891e-06	0.000153988	247	306	257	449	688	761	779	745	905	898	768
Lima1	1936.8	0.555608	0.11457	4.84952	1.2376e-06	0.000157622	1447	1670	1364	2268	3380	2730	3301	2747	3527	3077	3344
Sox4	494.217	-0.761238	0.157115	-4.84511	1.2654e-06	0.00015982	499	572	551	406	392	1210	1207	632	949	647	956
Qser1	1568.07	-0.634094	0.13093	-4.843	1.27896e-06	0.000160198	1354	1751	1935	1235	1501	3364	3139	2219	2131	2507	2152
Ucp2	437.262	0.677444	0.139954	4.84048	1.29524e-06	0.000160907	281	389	305	555	768	782	829	857	1191	977	1144
Col4a1	343.555	-0.927345	0.191819	-4.83449	1.33488e-06	0.000164483	406	442	313	263	246	449	666	279	399	306	381
Gm11410	3018.43	-0.576437	0.119758	-4.81333	1.48435e-06	0.000180402	2786	3177	3584	2424	2996	4506	6035	5667	5798	4867	4998
Pltp	204.218	0.857576	0.178184	4.81286	1.48788e-06	0.000180402	141	151	131	269	387	368	454	381	636	476	553
Anxa6	580.346	0.72815	0.151385	4.80991	1.51001e-06	0.000181633	416	489	360	674	1136	1481	1633	1621	2184	1883	1862
Ghr	36.0305	-2.40605	0.500499	-4.80731	1.52976e-06	0.00018256	32	35	79	13	10	29	45	15	20	10	24
Sytl3	87.2077	1.33955	0.278987	4.80149	1.57491e-06	0.000186479	38	44	67	116	211	193	222	288	360	367	252
Hmga2	189.356	-0.904646	0.188498	-4.79925	1.59263e-06	0.000187115	175	230	237	124	167	336	517	567	611	617	615
Cnpy1	325.071	-0.74299	0.154873	-4.7974	1.60738e-06	0.000187396	295	423	354	235	306	403	481	414	411	498	364
Nefl	132.931	-1.20682	0.252065	-4.78773	1.68675e-06	0.000195148	103	189	186	88	83	277	268	206	193	318	229
mt-Nd4	6725.14	-0.695723	0.145412	-4.7845	1.71414e-06	0.000196016	5221	7929	8850	5045	6370	12067	14660	12174	12809	12784	11711
Gm10136	464.334	0.689519	0.144136	4.7838	1.72012e-06	0.000196016	333	390	303	566	852	3	8	3	2	2	4
Rnd3	273.273	-0.835189	0.174798	-4.77802	1.7703e-06	0.000198746	277	298	333	205	224	382	473	416	366	468	328
Ttn	1954.81	-0.67596	0.141438	-4.77919	1.76001e-06	0.000198746	1725	2134	2469	1594	1718	4438	3651	3825	2693	5395	2623
Trim44	541.667	-0.646453	0.135379	-4.77512	1.79604e-06	0.000200152	516	608	616	424	516	1055	1132	993	908	1118	822
Phldb2	149.047	-0.999575	0.209784	-4.76477	1.89066e-06	0.000208342	163	203	147	97	120	168	236	88	100	118	102
Zfp423	304.634	-0.851131	0.178655	-4.7641	1.89702e-06	0.000208342	296	353	369	242	228	506	464	448	392	654	412
Pkd2	418.314	-0.82626	0.17441	-4.73746	2.16413e-06	0.000235968	395	508	492	346	304	620	699	485	490	528	437
Mosmo	123.737	-1.07026	0.22604	-4.73483	2.1924e-06	0.000237055	111	162	160	77	97	337	349	291	308	321	301
Cxadr	226.293	-0.828221	0.174965	-4.73363	2.20538e-06	0.000237055	207	282	268	160	200	363	465	360	408	440	404
Arl4c	270.722	-0.830136	0.175528	-4.72937	2.25216e-06	0.000240379	284	370	252	177	257	294	402	90	194	123	198
Acta2	59.1452	-1.755	0.372958	-4.70562	2.531e-06	0.00026825	95	86	43	24	33	26	239	3	5	20	14
Gm14124	213.333	-1.09585	0.232968	-4.70387	2.55275e-06	0.000268677	157	258	337	123	175	517	534	547	474	596	455
Zfp950	87.8377	-1.35679	0.28861	-4.70112	2.58743e-06	0.000270449	74	110	138	38	70	150	172	162	178	186	190
mt-Cytb	11114.5	-0.642152	0.137026	-4.68633	2.78144e-06	0.000287001	8859	13011	14061	8820	10452	23962	33448	30146	30904	31126	29191
Map1a	626.413	0.630858	0.134621	4.68617	2.78366e-06	0.000287001	469	464	472	786	1076	1122	1231	1086	1390	1166	1373
Gm10033	338.731	-0.818646	0.174894	-4.68081	2.8575e-06	0.000292624	271	428	437	242	299	665	779	757	665	825	627
Slc16a2	67.3044	-1.52281	0.326385	-4.6657	3.07567e-06	0.000312852	92	96	62	23	53	79	60	8	17	14	27
Hjurp	1679.92	0.518962	0.111442	4.65681	3.21151e-06	0.000324491	1147	1475	1328	1898	2954	2767	3386	3142	3727	3481	3430
Tnfrsf19	91.1583	-1.1759	0.253323	-4.6419	3.45222e-06	0.000346502	88	118	118	50	72	146	170	128	222	194	276
Mks1	121.729	1.1667	0.251739	4.63455	3.5772e-06	0.000356685	68	66	89	141	299	385	404	374	451	408	394
Bmf	203.365	0.889701	0.192028	4.63318	3.60091e-06	0.000356702	138	171	109	269	392	260	354	295	525	289	511
Syt11	175.786	-0.897108	0.193754	-4.63014	3.65423e-06	0.000359634	177	198	217	119	151	437	334	133	174	217	167
Ephx1	83.5211	1.32965	0.287992	4.61696	3.8941e-06	0.000380768	51	51	41	96	221	107	181	104	230	121	223
Cep131	254.61	0.803408	0.17445	4.60539	4.11702e-06	0.000399985	179	184	175	302	511	483	517	363	627	426	534
Mgat5b	71.1757	1.25789	0.273441	4.60024	4.22011e-06	0.000407388	40	47	39	99	160	180	186	170	204	216	224
Zfp932	176.974	-0.947604	0.207828	-4.55956	5.12618e-06	0.000488667	146	223	238	118	147	179	176	192	196	246	192
Clmn	144.089	0.929821	0.203929	4.55954	5.12655e-06	0.000488667	90	118	84	197	276	215	268	196	286	206	270
Pip4p2	178.851	-0.951953	0.209037	-4.554	5.26354e-06	0.000497691	174	199	237	96	177	483	444	376	453	401	440
Ankrd37	56.1064	1.58021	0.347066	4.55307	5.2869e-06	0.000497691	12	43	33	89	132	100	127	323	358	551	373
Sun1	940.181	0.576549	0.126902	4.54326	5.53901e-06	0.000515138	687	810	665	1069	1706	1453	1732	1802	2190	2144	2051
Trim56	272.225	0.734885	0.161754	4.54322	5.54021e-06	0.000515138	160	228	207	342	501	363	635	366	484	354	616
Lamc2	267.651	-0.840796	0.18512	-4.54189	5.57518e-06	0.000515228	292	369	235	187	236	256	378	220	265	228	262
Actb	14515.2	-0.449133	0.098995	-4.53693	5.708e-06	0.000524306	13804	16180	14699	12512	15117	37189	35111	26439	31470	33378	30616
Pcdh1	236.817	-0.831533	0.183455	-4.53262	5.82565e-06	0.000531889	254	263	268	183	188	620	508	125	184	175	189
Slc27a2	214.011	-0.868747	0.191726	-4.53118	5.86553e-06	0.000532324	228	267	222	167	161	383	308	154	195	168	171
Pttg1	265.65	0.787216	0.173927	4.52613	6.00728e-06	0.000541942	178	196	192	305	542	1207	1287	1152	1502	1399	1476
Pdzd2	97.2511	-1.178	0.260738	-4.51794	6.24452e-06	0.000560012	116	131	96	65	62	71	121	61	86	85	78
Gm15772	797.525	0.600616	0.132979	4.51663	6.28324e-06	0.000560169	593	667	556	909	1466	40	31	31	44	36	43
Efna5	70.1759	-1.34793	0.298838	-4.51058	6.4652e-06	0.000573021	77	91	86	46	37	83	86	23	18	28	27
Nexmif	420.553	-0.754651	0.167676	-4.50065	6.7747e-06	0.000596961	371	506	509	346	336	723	705	767	564	791	469
Ppp1r9b	275.933	0.759289	0.168807	4.49796	6.86074e-06	0.000601048	197	188	206	342	520	532	635	812	992	982	891
Car2	268.934	-0.849611	0.189046	-4.49419	6.98355e-06	0.000602329	244	292	363	201	218	502	727	216	334	321	344
Acsl4	323.937	-0.75514	0.168038	-4.49385	6.99458e-06	0.000602329	274	419	381	205	339	1006	886	661	899	739	787
D16Ertd472e	328.061	-0.694871	0.154548	-4.49614	6.91978e-06	0.000602329	290	412	369	243	316	658	797	862	744	1168	727
Tubb2b	926.456	0.515735	0.114869	4.48978	7.1296e-06	0.000610487	670	810	696	1113	1536	2159	2783	2282	2966	2678	3085
Igf2bp3	541.483	-0.769738	0.171651	-4.48432	7.31455e-06	0.000622805	524	735	534	457	409	408	546	302	371	380	388
Gm43776	29.523	-2.08354	0.465898	-4.4721	7.74552e-06	0.000654464	32	43	42	13	10	8	12	10	4	6	3
Syncrip	1526.54	-0.668928	0.149682	-4.46899	7.8591e-06	0.000654464	1192	1770	2001	1117	1524	5070	5014	4517	4556	5279	4284
C1qbp	1236.8	0.534118	0.119471	4.47068	7.79707e-06	0.000654464	839	1073	981	1376	2225	4870	4429	4410	4989	5103	4620
St6galnac2	97.8511	1.09245	0.244414	4.46967	7.83409e-06	0.000654464	61	54	69	138	199	199	226	203	211	211	191
Sox15	97.0164	1.15452	0.258718	4.46248	8.10147e-06	0.000670961	59	61	59	113	236	184	207	207	319	241	276
Fam49a	90.9027	-1.15576	0.259066	-4.46126	8.14804e-06	0.00067115	108	99	111	53	69	198	172	124	138	133	131
Col9a2	130.818	0.963702	0.216389	4.45357	8.44538e-06	0.000691882	84	79	96	190	240	265	253	403	422	462	409
Fst	47.389	-1.89475	0.426059	-4.44716	8.70136e-06	0.000709021	31	58	97	19	23	79	75	31	24	48	21
Sall2	160.71	-1.08931	0.245204	-4.44247	8.89326e-06	0.000720782	204	137	210	98	125	322	296	104	137	140	134
Pold2	314.041	0.702762	0.15834	4.43831	9.06699e-06	0.000730953	205	278	211	378	588	831	908	811	1222	968	1078
Gm5452	187.333	0.90826	0.20491	4.43248	9.31572e-06	0.000747032	119	170	95	255	356	316	281	249	488	407	451
Zfp125	156.915	-1.098	0.248036	-4.42676	9.56589e-06	0.000761384	116	193	244	101	115	258	259	186	173	270	183
Bzw1	1743.31	-0.59475	0.134373	-4.4261	9.59517e-06	0.000761384	1396	2051	2133	1362	1751	5620	5307	5382	5643	6857	5288
Dnmt3l	1301.38	0.485729	0.109795	4.42396	9.69069e-06	0.000764959	972	1106	1003	1573	2099	5333	4338	4735	5506	6113	5809
Srsf3	1267.52	-0.553445	0.125251	-4.41868	9.93039e-06	0.000779818	1046	1509	1465	983	1335	3151	3139	3063	3093	3716	2977
Ammecr1	221.456	-0.856493	0.193923	-4.41668	1.00231e-05	0.000783039	178	283	287	156	191	656	607	437	470	423	492
Usp28	1401.52	0.536521	0.121579	4.41293	1.01982e-05	0.000791421	954	1301	1028	1569	2513	2769	3007	2483	3426	2775	3475
Gm13110	60.5788	1.34705	0.305305	4.41215	1.02348e-05	0.000791421	22	39	43	90	135	93	141	161	228	180	196
A4galt	274.537	0.740739	0.168274	4.40198	1.07266e-05	0.000825242	169	255	176	355	494	401	508	442	538	432	509
Impact	1196.79	-0.610804	0.139001	-4.39425	1.11158e-05	0.00085086	1018	1293	1515	914	1211	2596	2736	1832	2183	2448	2104
Scd1	632.024	0.612897	0.139587	4.39077	1.12948e-05	0.000860223	415	507	515	707	1189	1376	1211	1131	1892	1226	1808
Carnmt1	283.189	-0.808089	0.184253	-4.38577	1.15578e-05	0.000867177	221	361	367	196	261	179	209	211	188	245	219
Rps27a-ps2	1021.76	0.560177	0.127686	4.38716	1.14842e-05	0.000867177	784	840	731	1167	1827	522	646	528	509	542	633
Pfkl	1472.23	0.638407	0.145545	4.38632	1.15283e-05	0.000867177	898	1504	951	1824	2579	2661	2991	2685	4237	3509	4445
Psma8	86.795	-1.15133	0.26296	-4.37833	1.19591e-05	0.000892866	81	131	97	52	65	154	150	118	186	151	161
Rbm3	431.193	-0.682577	0.155979	-4.37608	1.20833e-05	0.000897719	368	501	534	294	453	757	728	649	659	739	632
Mt1	580.143	0.72675	0.166348	4.36886	1.24897e-05	0.0009189	455	483	322	718	1075	3023	3487	2079	3568	2634	3624
Ybx2	155.307	0.937686	0.214581	4.36984	1.24337e-05	0.0009189	83	131	102	181	341	277	312	222	337	211	332
1700001L05Rik	231.108	0.809732	0.185535	4.36431	1.27524e-05	0.0009337	126	183	183	271	471	694	742	820	1089	992	1083
Zdhhc21	310.53	-0.70619	0.161905	-4.36175	1.29024e-05	0.000934609	265	384	368	219	310	670	756	681	868	705	820
Cbfb	445.346	-0.659188	0.151118	-4.36207	1.2884e-05	0.000934609	384	507	549	328	446	1185	1271	1245	1216	1482	1121
Atp1b2	181.537	0.88191	0.202229	4.36095	1.29498e-05	0.000934609	111	153	112	209	390	550	551	549	623	647	578
Rps6ka6	571.625	-0.665389	0.152644	-4.35908	1.30607e-05	0.000938145	453	711	697	410	584	1600	1603	1583	1880	1903	1812
Fat2	169.155	1.00843	0.231558	4.355	1.33068e-05	0.00095131	93	162	81	211	367	142	192	291	285	254	268
Lrrc58	828.213	-0.579964	0.133476	-4.34507	1.39229e-05	0.000990682	691	991	960	602	904	1532	1585	1043	1239	1109	1171
Zyx	119.951	-1.00344	0.231191	-4.34033	1.42267e-05	0.00100757	142	145	123	82	91	112	133	65	94	80	106
Rragd	252.074	-0.781412	0.180132	-4.338	1.43783e-05	0.00101357	249	265	315	189	219	676	741	535	608	635	552
Abcg2	318.181	-0.717702	0.165493	-4.33675	1.44603e-05	0.00101463	284	427	334	251	280	554	599	493	593	719	622
Sqstm1	1127.63	0.530829	0.122493	4.33356	1.46716e-05	0.00102251	831	917	880	1259	2017	2767	3438	2256	3097	3029	2912
Smtnl2	381.398	0.8071	0.186267	4.33302	1.47075e-05	0.00102251	215	369	234	428	803	723	1005	1054	1466	1242	1376
Pid1	102.235	-1.10474	0.255062	-4.33126	1.48256e-05	0.00102601	94	137	130	47	98	116	138	73	84	95	70
Piezo2	28.674	-1.99686	0.462102	-4.32125	1.55148e-05	0.00106141	38	38	36	10	14	21	18	5	8	5	11
Gm16233	49.1736	-1.53782	0.356	-4.31972	1.56226e-05	0.00106141	42	73	70	27	26	76	59	37	45	46	45
Ap1s3	103.639	-1.22229	0.282839	-4.32151	1.54966e-05	0.00106141	79	122	171	57	78	254	247	140	133	152	155
Rbm12	362.141	-0.680322	0.157476	-4.32017	1.55911e-05	0.00106141	304	443	433	258	367	938	1090	820	842	911	889
Basp1	368.591	-0.672647	0.155803	-4.31729	1.57957e-05	0.00106141	354	408	427	297	331	858	928	851	898	946	909
Gm7729	1026.56	0.481673	0.111557	4.31774	1.57637e-05	0.00106141	716	904	822	1225	1673	89	103	87	119	101	124
Pgk1-rs7	1075.79	0.70683	0.163737	4.31685	1.58273e-05	0.00106141	682	1099	608	1347	1951	0	0	0	0	0	0
Lgals9	38.171	1.75239	0.406297	4.31309	1.60992e-05	0.00107488	15	15	24	46	115	170	157	202	237	279	198
Snhg5	611.316	-0.557462	0.129316	-4.31085	1.62629e-05	0.00108105	580	675	673	454	667	1981	1896	1377	1321	1645	1361
Fxr2	1250.01	0.525191	0.121902	4.30832	1.645e-05	0.00108872	846	1053	1031	1383	2246	2893	2947	2831	3661	3190	3462
Efhb	36.2351	1.61428	0.374819	4.30683	1.65614e-05	0.00109132	15	23	17	59	84	46	89	98	123	132	117
Capn2	161.249	-0.920176	0.214203	-4.29581	1.7406e-05	0.00112737	187	216	143	107	138	157	250	83	102	111	133
Fhl1	254.824	-0.74458	0.173216	-4.29857	1.71904e-05	0.00112737	246	348	247	176	250	365	388	273	330	310	273
Ddah2	221.512	0.838563	0.195197	4.29598	1.7392e-05	0.00112737	133	213	122	293	415	391	499	459	730	526	695
Gfap	134.248	1.11737	0.260048	4.29679	1.73288e-05	0.00112737	68	68	115	159	318	535	629	264	263	410	348
Csrnp3	105.821	-1.0256	0.23907	-4.28996	1.78703e-05	0.00115252	102	153	113	69	83	145	247	215	229	243	287
Gm14681	4058.52	0.492479	0.114952	4.28421	1.83391e-05	0.00117774	2840	3432	3335	4367	7308	6121	6104	5531	7257	6669	6665
Rap1gap2	114.978	0.989073	0.231245	4.27716	1.89296e-05	0.00121054	70	90	68	139	252	201	261	193	261	240	240
Slf1	126.286	-0.990624	0.231778	-4.27401	1.91985e-05	0.00122257	103	170	165	75	112	337	343	357	397	460	340
Fbn1	70.747	-1.3289	0.311094	-4.27169	1.93993e-05	0.00122517	91	82	80	48	36	153	124	32	38	32	34
Smo	152.017	-0.961446	0.225091	-4.27137	1.94274e-05	0.00122517	186	175	153	113	109	185	174	87	122	106	166
Wdr62	699.208	0.514376	0.120442	4.27075	1.94818e-05	0.00122517	485	601	558	850	1145	1224	1238	1080	1246	1380	1298
Gm3362	1051.49	0.527426	0.123765	4.2615	2.03061e-05	0.00127173	773	901	784	1165	1889	4	4	4	3	3	1
Creb1	529.089	-0.631129	0.148133	-4.26057	2.03909e-05	0.00127179	445	621	637	422	502	1110	1189	940	1018	1109	963
Spred3	89.0673	-1.17661	0.27639	-4.25706	2.07128e-05	0.00128657	102	108	103	65	50	122	96	74	83	70	75
H3f3a	428.169	-0.618376	0.145326	-4.25511	2.0895e-05	0.00129259	368	538	472	313	449	624	705	530	716	670	674
Oip5os1	812.722	-0.591113	0.139023	-4.25191	2.11958e-05	0.00130587	676	941	979	584	887	1653	1967	1490	1674	1689	1840
Banp	288.019	0.654551	0.154044	4.24913	2.14604e-05	0.00131682	195	237	213	357	509	457	438	688	855	764	836
Polq	218.84	-0.811334	0.191119	-4.24519	2.18413e-05	0.00133478	235	261	228	176	169	281	305	263	391	370	339
Adamts14	133.613	0.897894	0.211609	4.24317	2.20386e-05	0.00133981	94	92	86	173	263	256	229	231	340	331	290
Aldoc	99.1582	1.16647	0.274983	4.24197	2.21569e-05	0.00133981	67	70	45	113	246	167	220	165	313	218	325
Cyp2s1	42.0603	1.53524	0.361946	4.24164	2.21888e-05	0.00133981	21	24	21	54	113	95	119	173	221	254	232
Rhobtb3	213.417	-0.757943	0.178788	-4.23935	2.24166e-05	0.0013482	213	255	233	165	184	317	357	166	274	232	277
Ryr1	366.392	0.640748	0.151429	4.23133	2.32313e-05	0.00139167	277	298	246	470	620	498	496	444	604	573	556
Ccne2	147.217	-0.89901	0.21289	-4.22289	2.41187e-05	0.00143915	133	171	194	100	126	407	398	412	413	525	414
Osbpl10	76.8693	1.14759	0.271864	4.22118	2.43029e-05	0.00144255	35	61	48	101	172	133	161	189	262	237	296
Ndrg2	76.4081	1.3135	0.311211	4.22059	2.43661e-05	0.00144255	56	36	38	91	196	208	242	213	357	246	336
Ppp1r2	243.485	-0.711412	0.168693	-4.21719	2.47368e-05	0.00145257	226	285	284	169	245	411	443	364	422	439	366
Rpl23a-ps3	1320.77	0.496058	0.11764	4.21675	2.47851e-05	0.00145257	999	1170	951	1517	2253	147	160	140	190	184	182
Itpr3	1042.76	0.511295	0.121263	4.2164	2.48229e-05	0.00145257	788	929	734	1238	1743	1614	1596	1620	2114	1983	1964
Gm6532	35.6571	1.73528	0.412604	4.20567	2.60307e-05	0.00151739	10	30	12	60	85	1	1	1	1	0	1
Sinhcaf	643.754	-0.541737	0.129268	-4.1908	2.77968e-05	0.00161413	570	784	679	528	648	203	218	204	266	237	228
2900097C17Rik	581.126	-0.541571	0.129356	-4.18668	2.83061e-05	0.00163743	555	696	579	468	596	306	393	285	376	324	393
Prom1	164.029	-0.80754	0.193427	-4.17491	2.9811e-05	0.00171793	164	191	189	115	149	225	291	66	138	89	114
Khnyn	234.977	0.757294	0.181492	4.17259	3.01155e-05	0.0017289	135	222	155	290	446	335	418	432	623	589	730
Cdk5rap3	369.94	0.638458	0.153092	4.17042	3.04036e-05	0.00173886	262	308	263	420	698	991	1014	842	1240	966	1120
Mib2	261.932	0.689516	0.165489	4.16653	3.09268e-05	0.00175553	189	197	190	357	430	502	539	636	772	766	735
Tjp3	183.323	0.82238	0.197363	4.16685	3.08844e-05	0.00175553	105	170	114	266	309	222	238	187	350	217	318
Trmt11	115.841	-0.956874	0.230142	-4.15776	3.21387e-05	0.00181076	113	145	139	63	113	357	314	387	348	425	327
Nfe2l1	1576.18	0.483316	0.116224	4.15847	3.20381e-05	0.00181076	1123	1342	1277	1724	2782	3586	3816	3231	4053	3640	3678
Fat1	9699.79	-0.464301	0.111818	-4.15228	3.29177e-05	0.00184778	9239	10439	10245	8614	9609	12967	11754	5936	7355	7527	7179
Fermt1	74.1646	-1.14263	0.275373	-4.14939	3.33369e-05	0.00186265	76	103	83	46	54	82	116	31	26	30	24
Erbin	390.212	-0.649056	0.156455	-4.14851	3.34643e-05	0.00186265	337	467	456	318	355	537	523	435	420	462	352
Rps27a	789.276	0.528165	0.127332	4.14792	3.35513e-05	0.00186265	603	642	594	907	1374	169	209	172	184	213	184
Rara	450.036	0.607778	0.146561	4.14692	3.36974e-05	0.00186393	306	333	382	547	785	1021	1027	853	1019	1031	1072
Gm9794	3425.66	0.516819	0.12468	4.14517	3.39561e-05	0.00187141	2762	2757	2470	3859	6030	4965	5626	4968	5950	5206	5987
Parpbp	182.672	-0.83819	0.202254	-4.14425	3.40928e-05	0.00187214	168	254	194	104	192	396	447	355	434	343	415
Bmpr2	624.738	-0.557278	0.134562	-4.1414	3.45187e-05	0.00188868	562	679	731	477	665	1350	1361	1134	1188	1212	1059
Snord78	155.193	-1.01714	0.24583	-4.13759	3.50972e-05	0.00191343	105	221	218	94	132	302	324	271	241	260	234
Snord64	22.9369	-2.38303	0.576158	-4.13607	3.53299e-05	0.00191921	17	31	46	8	7	152	163	69	88	97	97
Arrdc3	495.959	-0.611635	0.147977	-4.13331	3.57578e-05	0.00193552	412	581	598	378	503	1106	1072	956	1175	1299	1065
Rab11fip4	646.221	0.526319	0.127409	4.13093	3.61305e-05	0.00194807	450	593	474	759	1103	1280	1451	891	1443	965	1388
Slc15a1	47.7617	1.42897	0.345982	4.13019	3.62467e-05	0.00194807	25	35	19	63	121	82	128	173	190	219	185
B230219D22Rik	403.949	-0.61318	0.148497	-4.12923	3.63983e-05	0.0019493	348	498	452	288	435	769	991	818	1044	922	1021
Cald1	321.525	-0.745375	0.180643	-4.12623	3.68751e-05	0.00196788	342	415	297	265	259	297	608	240	329	290	298
Selenot	530.23	-0.741632	0.179961	-4.12107	3.77117e-05	0.00200547	403	608	738	394	485	1572	1621	1503	1540	1799	1507
Tbc1d4	160.792	-0.809235	0.196452	-4.11925	3.801e-05	0.00201042	154	210	172	116	142	301	258	226	318	308	280
Meg3	4871.67	-0.463046	0.11242	-4.11889	3.807e-05	0.00201042	4770	5028	5191	4190	5017	8681	7742	3586	3676	3948	3741
Tenm4	739.673	-0.722184	0.175499	-4.11504	3.87109e-05	0.00203716	741	846	822	667	533	673	832	720	740	1043	729
Ptbp2	438.332	-0.676228	0.164553	-4.10949	3.96539e-05	0.00207957	351	511	564	329	424	1005	1115	703	634	893	618
Fads2	494.371	0.556133	0.135358	4.10862	3.98036e-05	0.00208022	339	395	410	598	837	1380	1130	993	1260	1235	1072
Kcnq3	23.8977	-2.28382	0.556734	-4.10217	4.09294e-05	0.00212441	30	28	37	12	4	16	12	4	3	3	8
Ttyh2	241.887	0.839349	0.204585	4.10268	4.08388e-05	0.00212441	133	196	181	251	545	381	426	468	606	504	476
Gm35315	135.101	-0.918402	0.224079	-4.09856	4.15726e-05	0.00215042	109	186	168	86	121	339	332	263	353	335	317
Gm23455	323.558	-0.780273	0.19056	-4.09463	4.22846e-05	0.00217982	248	399	430	251	271	1135	979	1007	937	1213	1067
Slc12a7	745.826	0.544363	0.133204	4.08667	4.37606e-05	0.00224826	515	657	567	812	1374	876	985	898	1257	1009	1167
Lrrc31	62.9334	1.19676	0.293073	4.0835	4.43615e-05	0.00227143	34	50	31	88	137	58	80	74	122	51	118
Tcf12	434.855	-0.602654	0.147727	-4.0795	4.51318e-05	0.00230309	440	490	451	363	403	712	738	450	491	534	489
Efnb2	194.145	-0.778873	0.191021	-4.07742	4.55382e-05	0.00230828	189	210	240	145	170	494	424	241	205	344	241
Zkscan17	704.994	0.552767	0.135557	4.07774	4.54751e-05	0.00230828	485	617	537	765	1309	1518	1599	1115	1628	1285	1580
Gm10132	994.985	0.518436	0.12718	4.07638	4.57421e-05	0.00231089	768	842	718	1120	1753	2	2	0	2	1	0
Lratd2	73.7527	-1.132	0.277902	-4.07339	4.63333e-05	0.00233298	70	95	95	46	54	242	188	135	170	132	171
Galnt10	85.426	-1.08396	0.266667	-4.06486	4.80616e-05	0.00241199	102	90	103	52	67	144	135	82	126	115	134
Unc13a	92.4636	0.979715	0.241225	4.06142	4.8775e-05	0.00243971	60	69	54	131	176	78	111	130	191	159	190
Gm38020	95.338	-1.09827	0.270845	-4.05497	5.01407e-05	0.00249208	75	119	142	55	78	189	131	50	63	59	62
Hnrnpa1l2-ps2	397.251	0.575928	0.142032	4.05492	5.01508e-05	0.00249208	293	320	298	498	658	6	9	1	8	5	5
Spon1	18.5186	-2.56575	0.63319	-4.0521	5.0761e-05	0.00251416	32	23	20	4	7	49	39	4	10	5	8
Stag2	797.404	-0.624189	0.154123	-4.04994	5.12304e-05	0.00252093	613	948	1011	591	821	2058	2127	1256	1855	1570	1808
Vcl	1224.12	-0.476792	0.117714	-4.05043	5.11244e-05	0.00252093	1193	1418	1182	1043	1258	1705	1963	1253	1574	1563	1526
Tia1	249.379	-0.669148	0.165467	-4.044	5.25474e-05	0.00257737	233	312	264	177	256	455	435	319	453	385	416
Tmem126a	87.4862	-1.0376	0.25685	-4.0397	5.35196e-05	0.00261659	86	126	93	52	74	320	258	215	308	334	278
Itpripl2	51.5751	-1.37667	0.340963	-4.03758	5.40043e-05	0.0026318	44	77	69	30	31	87	106	46	51	66	77
Rpl19-ps11	1851.65	0.455076	0.112858	4.03227	5.52403e-05	0.0026834	1392	1661	1384	2057	3165	568	623	604	577	636	643
Dennd5b	295.66	-0.626109	0.155413	-4.02867	5.60941e-05	0.00269039	289	335	322	217	306	355	465	363	407	404	483
Nudt5	347.851	-0.593936	0.147406	-4.02925	5.59551e-05	0.00269039	325	398	384	267	356	633	595	539	564	725	507
Spag5	724.658	0.525124	0.130279	4.03078	5.55922e-05	0.00269039	522	612	562	798	1306	1595	1994	1515	1848	1714	1688
Zfp516	610.027	0.579759	0.143885	4.02932	5.59375e-05	0.00269039	422	591	396	749	1036	913	1133	858	1429	1115	1395
Spry4	511.312	-0.682387	0.169512	-4.02561	5.68285e-05	0.00271701	548	597	504	448	406	987	949	1426	1280	1811	1284
Elf3	191.705	0.854914	0.212522	4.0227	5.75343e-05	0.00274211	100	176	128	213	417	383	465	538	784	681	680
Zdhhc15	84.3881	-1.12509	0.279756	-4.02169	5.77818e-05	0.00274527	73	101	123	56	58	177	215	178	190	207	165
Mid1	628.663	-0.660931	0.16451	-4.01757	5.88001e-05	0.00278492	669	833	528	507	570	244	220	103	91	165	82
Setbp1	252.654	-0.748711	0.186729	-4.00961	6.08179e-05	0.00287151	280	290	254	208	203	261	273	83	137	131	135
Ror1	38.7978	-1.73684	0.433703	-4.00467	6.21035e-05	0.00292311	40	34	73	15	23	79	77	32	30	44	27
Pkdcc	95.7816	-1.09073	0.272731	-3.99927	6.35372e-05	0.00297213	99	127	108	75	54	118	93	22	43	37	44
Adam19	1265.31	0.508477	0.127129	3.99971	6.34205e-05	0.00297213	953	1126	899	1387	2266	2110	2144	2246	2355	2473	2165
Ube2z	1055.8	0.529621	0.132475	3.99789	6.3911e-05	0.00297631	787	828	843	1146	1931	3213	3120	3014	3305	3378	3095
Gpat2	36.3174	1.66859	0.417409	3.99748	6.40193e-05	0.00297631	16	23	15	39	113	169	134	186	223	177	199
Dlgap5	939.053	0.491054	0.122873	3.99645	6.43001e-05	0.00298022	685	828	712	1037	1652	2123	2322	1997	2502	2588	2564
Phf19	286.034	0.618168	0.154916	3.99033	6.5981e-05	0.00304881	189	234	226	355	493	729	536	850	746	930	582
Gm42664	137.223	-0.961822	0.241202	-3.98762	6.67384e-05	0.00307443	106	164	202	87	118	217	246	146	141	167	158
Rabgef1	377.265	0.671559	0.168639	3.98223	6.82706e-05	0.00313548	224	348	275	411	751	1104	1283	1453	1787	1732	1780
B3gnt5	127.059	-0.881428	0.221471	-3.97989	6.89483e-05	0.00315704	123	177	130	91	105	142	245	151	210	199	211
Cisd2	105.036	-0.964997	0.24256	-3.97839	6.93832e-05	0.00316284	97	136	127	77	77	286	248	189	162	206	182
Dnm1	106.659	0.967008	0.243088	3.97802	6.94924e-05	0.00316284	71	88	54	135	223	101	115	80	131	93	116
Psmd3	1145.13	0.46879	0.117869	3.97722	6.97259e-05	0.00316397	850	992	888	1266	1983	3461	3293	3022	3892	3694	3606
Zfp36l2	397.517	-0.594095	0.14942	-3.97601	7.00813e-05	0.00316611	349	456	462	319	389	694	626	499	551	601	490
Castor1	261.926	0.679354	0.170879	3.97564	7.01909e-05	0.00316611	179	216	187	294	511	837	770	755	855	913	774
Mmp25	110.149	-0.987651	0.248565	-3.97341	7.08523e-05	0.00318646	124	113	137	80	79	266	199	89	99	121	90
Zfp652	1347.61	0.592172	0.149078	3.97223	7.12029e-05	0.00319275	817	1181	1104	1388	2667	3204	3465	2833	3523	2981	3471
Fsd1l	110.703	-0.973139	0.245178	-3.96911	7.21426e-05	0.00322535	105	172	106	72	92	212	217	205	196	251	207
Rpl38-ps2	389.735	0.57366	0.144579	3.96779	7.25423e-05	0.00323368	293	311	290	473	665	690	852	755	665	704	812
Mdc1	2289.37	0.457121	0.115264	3.96587	7.31298e-05	0.00325031	1793	1937	1733	2539	3924	3401	3739	3024	4483	3420	4563
Clcn5	386.477	-0.605719	0.152793	-3.96432	7.36068e-05	0.00326194	345	469	422	324	356	592	649	490	588	538	505
Enc1	1068.38	-0.472557	0.119258	-3.96246	7.41806e-05	0.00326967	996	1153	1155	913	1099	2269	2137	1731	1691	2281	1539
Twf2	273.848	0.644027	0.162536	3.96236	7.42127e-05	0.00326967	173	251	195	333	490	702	660	742	987	1135	1000
Zfp345	119.652	-0.976564	0.246699	-3.95853	7.54125e-05	0.0033129	93	149	171	77	100	269	240	257	243	311	231
Gm40040	79.6643	-1.12526	0.284467	-3.9557	7.63106e-05	0.00334267	93	117	70	51	57	84	122	27	71	37	72
Ypel2	119.094	0.890783	0.225498	3.95029	7.80551e-05	0.00340923	87	89	67	169	214	179	252	285	373	277	386
Ube2d2a	375.874	-0.5776	0.146298	-3.9481	7.87737e-05	0.00342336	338	440	417	276	407	554	634	507	513	548	551
Socs3	428.388	0.574418	0.145499	3.94793	7.88303e-05	0.00342336	302	398	289	531	718	772	864	827	1304	1059	1377
Slc4a4	113.455	-0.920973	0.233367	-3.94645	7.9317e-05	0.00342909	101	153	133	82	89	174	147	108	95	99	74
Bicd1	128.296	-0.878853	0.222711	-3.94616	7.94147e-05	0.00342909	129	143	158	95	102	318	259	198	200	275	177
mt-Nd1	13145.7	-0.543226	0.137707	-3.9448	7.98657e-05	0.00343172	10616	14012	16843	10500	13559	35140	46031	41368	41641	42018	38526
Slc38a1	1927.95	-0.477641	0.121087	-3.94461	7.99285e-05	0.00343172	1670	2237	2091	1711	1888	3688	3627	2605	2912	3016	2671
Anxa5	73.6533	-1.09004	0.276446	-3.94304	8.04556e-05	0.00344459	86	88	82	42	61	75	138	42	73	69	83
Rpl26	1204.4	0.543787	0.138166	3.93575	8.29377e-05	0.00353091	951	951	883	1302	2230	3077	3302	2753	3487	3114	3309
Catsperg1	162.599	0.815601	0.207216	3.936	8.28512e-05	0.00353091	113	142	89	205	313	133	187	110	172	126	167
Ivns1abp	1097.43	-0.451597	0.114771	-3.93476	8.32804e-05	0.00353557	1057	1173	1144	906	1194	2695	3040	2485	3090	2776	2737
Gnas	896.524	-0.630937	0.160486	-3.93143	8.44433e-05	0.00356497	917	1082	871	811	721	1234	1234	640	983	728	899
Tnip1	417.501	0.585288	0.148873	3.93145	8.44334e-05	0.00356497	282	384	296	474	763	792	809	741	928	806	896
Ubqln2	398.551	-0.6635	0.16885	-3.92951	8.5118e-05	0.00358347	336	485	471	340	337	903	907	787	794	848	783
BC067074	582.368	0.506618	0.129034	3.92623	8.62861e-05	0.00362258	406	532	438	677	990	740	980	889	1196	967	1258
Gm8430	1323.78	0.48894	0.124671	3.92183	8.78786e-05	0.00367925	1044	1139	944	1492	2285	141	152	109	164	141	159
Capns1	775.514	0.540453	0.138024	3.91566	9.01574e-05	0.00376426	612	675	514	914	1331	1562	1783	1613	2128	2043	2125
Stra8	21.2668	1.98216	0.506365	3.91449	9.05949e-05	0.00377213	7	9	11	30	63	33	63	122	188	175	207
Lrrn4	126.6	-0.915665	0.234334	-3.90752	9.3249e-05	0.00384834	114	137	178	80	114	256	232	207	184	208	187
Srsf6	1823.63	-0.460748	0.11788	-3.90861	9.28275e-05	0.00384834	1573	2019	2052	1570	1882	4983	4668	4662	4311	5450	3953
Gm5540	67.5024	1.164	0.29783	3.90828	9.29549e-05	0.00384834	38	38	48	80	163	110	86	117	137	125	108
Platr11	25.9615	1.76423	0.451554	3.90702	9.34408e-05	0.00384834	7	16	14	41	66	29	54	64	76	61	106
Nbea	267.473	-0.658491	0.168652	-3.90444	9.44447e-05	0.00387914	264	315	282	221	237	496	477	372	459	463	369
Slfn9	99.7255	1.15536	0.296353	3.8986	9.67515e-05	0.00396315	34	62	90	122	236	307	296	385	739	406	638
Ccn2	315.001	-0.616108	0.158224	-3.8939	9.86467e-05	0.00402989	290	345	371	243	314	475	513	482	354	727	352
Zfp934	304.576	-0.811889	0.208599	-3.89211	9.93768e-05	0.0040488	208	406	413	193	303	344	339	342	381	471	393
Gm47024	116.829	-0.872564	0.224463	-3.88734	0.000101347	0.00411801	107	145	142	80	102	108	101	58	60	46	45
Tpbg	56.7748	-1.20538	0.310246	-3.88523	0.000102232	0.00414286	61	76	65	34	40	120	112	71	78	92	80
Parva	99.2409	-0.984027	0.253391	-3.88343	0.000102992	0.00416251	111	117	110	75	68	75	159	56	51	63	51
Plcb3	693.913	0.47098	0.121338	3.88156	0.000103786	0.00417106	497	604	554	804	1154	1227	1291	1226	1681	1397	1457
Slc25a30	310.002	0.695066	0.179095	3.881	0.000104029	0.00417106	196	271	221	325	642	596	745	535	969	562	899
Myom3	19.844	1.99479	0.513962	3.8812	0.000103943	0.00417106	7	9	9	31	55	76	92	85	101	81	97
Ptpn14	1084.87	-0.481278	0.124122	-3.87747	0.000105547	0.00422078	1104	1216	1036	921	1114	1177	1493	484	735	597	740
Cachd1	227.609	-0.710212	0.183333	-3.87389	0.000107111	0.00427205	217	257	266	187	192	334	392	210	276	289	296
Pxdn	319.256	-0.624539	0.161408	-3.86931	0.000109142	0.00433969	332	396	294	239	325	514	454	169	265	249	316
Pten	1159.32	-0.581935	0.150418	-3.86878	0.00010938	0.00433969	890	1333	1479	897	1191	2706	2670	1880	2061	2195	2027
Ppp4r3a	1364.9	-0.493843	0.127747	-3.86579	0.000110729	0.00438175	1136	1518	1607	1134	1418	2984	3014	2619	2704	3024	2512
Tcf7	410.449	0.614899	0.159094	3.86501	0.000111083	0.00438432	283	343	307	435	805	971	987	572	943	626	956
Tmem231	321.015	0.621186	0.160777	3.86364	0.00011171	0.00439761	210	256	262	361	604	553	838	809	1008	875	907
Eif4g3	684.296	-0.656647	0.170104	-3.86028	0.000113259	0.00443552	663	829	714	628	522	745	748	393	357	478	306
Rnf213	1453.97	0.580961	0.150486	3.86057	0.000113122	0.00443552	953	1199	1193	1450	2922	3264	4237	2928	3609	3752	3329
Dgcr8	983.272	0.496301	0.128606	3.85909	0.000113812	0.00444569	685	767	866	1231	1541	2174	2157	1922	1919	2306	2015
Gm14409	263.027	-0.703261	0.182266	-3.85843	0.000114116	0.00444613	245	267	341	193	253	270	249	286	255	394	249
Gm9118	3326.9	0.463214	0.120083	3.85744	0.000114581	0.00445281	2232	3020	2731	3505	5979	2183	2183	2132	2552	2494	2426
Ptges3	1354.76	-0.580977	0.15136	-3.83837	0.000123851	0.00480074	1004	1644	1690	1020	1431	2184	2282	2144	2517	2469	2457
Igfbp2	1196.28	0.552822	0.144122	3.83579	0.00012516	0.00483908	880	1159	745	1382	2110	2425	3282	2766	4200	3647	4563
Noct	419.262	-0.558153	0.145594	-3.83363	0.000126266	0.00485026	414	438	466	325	439	948	1223	939	840	1112	770
Gm5611	1141.23	0.468	0.122086	3.83335	0.000126409	0.00485026	825	978	920	1230	2018	28	30	24	32	33	16
Tsc1	426.103	0.538093	0.14035	3.83395	0.000126102	0.00485026	318	369	305	518	709	504	747	544	699	621	706
Flnc	419.307	-0.5867	0.153648	-3.81847	0.000134283	0.00513939	459	474	392	316	439	752	980	338	513	582	569
2700081O15Rik	174.865	-0.750882	0.196718	-3.81705	0.000135055	0.00515592	161	196	217	132	156	276	280	301	233	392	231
Sfmbt2	886.847	-0.588795	0.154343	-3.81485	0.000136267	0.00518912	682	1128	1035	752	818	1650	1414	1386	1718	1874	1584
Gm5276	132.476	0.888441	0.232996	3.81311	0.000137227	0.00521257	77	130	68	182	247	48	64	68	84	67	90
Tcea3	278.445	0.611129	0.160556	3.80633	0.000141043	0.0053308	197	212	222	335	491	596	716	715	1037	947	1027
Fmr1nb	54.4767	1.39249	0.365832	3.80638	0.000141015	0.0053308	38	17	34	68	140	271	291	255	338	281	272
Zfp266	934.092	-0.45184	0.118903	-3.80008	0.000144652	0.00544005	835	1023	1023	780	1005	1972	2168	1362	1798	1569	1709
Hydin	124.224	0.905717	0.238307	3.80064	0.000144325	0.00544005	95	90	67	147	264	331	293	401	574	470	580
Zdbf2	2393.85	-0.419313	0.110597	-3.79137	0.000149816	0.00562034	2053	2756	2542	2102	2517	4078	4028	4059	4286	4776	4052
Rc3h2	817.185	-0.552816	0.145865	-3.78991	0.000150704	0.00563968	656	922	1011	609	894	2035	2174	1760	1732	2055	1685
Sipa1l2	585.133	0.522738	0.138061	3.78629	0.000152912	0.00569419	451	515	403	680	1005	888	1000	727	1046	858	1084
Fabp3-ps1	390.891	0.596694	0.157573	3.78677	0.000152617	0.00569419	316	288	281	484	664	177	256	221	342	267	328
Gulp1	21.9574	-2.03437	0.537841	-3.78247	0.000155277	0.00575712	22	42	24	8	10	48	54	22	26	17	34
Gclc	589.18	-0.496368	0.131233	-3.78234	0.000155362	0.00575712	571	629	629	486	615	1008	1240	707	879	871	820
Arhgef18	611.031	0.504976	0.133763	3.77514	0.000159916	0.00591144	478	486	468	756	975	1039	1284	1173	1353	1473	1340
Gm38374	101.426	-0.929482	0.246329	-3.77333	0.000161081	0.00594002	85	134	128	70	83	228	229	284	158	268	168
Rpl19-ps1	461.872	0.588616	0.15607	3.77148	0.000162282	0.00596977	367	352	332	517	854	9	9	6	9	9	5
Msh6	5268.17	0.387768	0.102895	3.76858	0.000164177	0.00602484	3768	4644	4503	5750	8735	11764	13524	14092	15905	16589	15162
Fn1	9508.74	0.412225	0.109418	3.76743	0.000164935	0.00603806	7619	8510	6918	11014	15176	13143	14592	10614	13979	12614	13533
Top2a	8097.59	0.480885	0.127767	3.76376	0.00016738	0.00611279	5464	7020	6796	8249	15104	22858	24816	21088	27948	25735	27373
Tex19.1	170.554	0.760024	0.202065	3.76129	0.000169036	0.00615845	106	117	144	203	333	1295	1284	1476	1241	1934	1161
Olfr984	20.2751	-2.20139	0.58573	-3.75837	0.000171025	0.00617157	20	44	19	7	8	7	16	12	13	12	9
Gm26384	363.626	-0.560407	0.149072	-3.7593	0.000170386	0.00617157	319	452	384	271	395	1	2	1	1	2	1
Rack1	6755.54	0.40339	0.107328	3.75849	0.000170942	0.00617157	5291	5965	5172	7367	11332	21056	22560	19183	25179	23474	24377
Grb7	186.244	0.687352	0.182842	3.75927	0.000170413	0.00617157	118	163	133	226	343	607	482	376	681	485	654
Cdc14b	204.374	-0.67433	0.179477	-3.7572	0.000171825	0.0061857	182	256	226	156	195	420	447	328	438	360	507
Nox4	25.9088	-1.80972	0.481897	-3.7554	0.000173063	0.00621549	25	45	31	12	12	42	44	38	31	29	23
Triobp	362.922	0.604044	0.160918	3.75374	0.000174216	0.00624211	245	355	232	453	617	599	635	459	681	557	682
Adam23	318.936	-0.645087	0.171911	-3.75244	0.000175118	0.00625965	311	397	318	277	269	339	422	360	331	470	343
Dleu2	238.12	-0.675684	0.180112	-3.75148	0.000175796	0.0062691	205	270	297	183	225	592	808	632	915	807	802
2610307P16Rik	72.1372	-1.11313	0.296886	-3.74934	0.000177297	0.00630779	87	85	80	31	71	119	88	43	43	40	44
Gng5	127.786	-0.816056	0.217746	-3.74775	0.00017843	0.00633323	112	170	146	90	115	150	148	146	166	145	165
Gramd1a	285.452	0.588477	0.157103	3.7458	0.000179823	0.00636774	182	259	216	358	478	466	455	375	597	465	484
Arpc5	348.989	-0.56692	0.151405	-3.74438	0.000180839	0.00638879	304	405	398	273	360	695	834	639	671	754	688
Syk	271.718	0.616995	0.164884	3.742	0.000182559	0.00643456	174	248	198	315	498	315	340	279	417	400	433
Ntpcr	62.9342	1.12731	0.301578	3.73805	0.00018545	0.00652131	26	48	45	80	143	238	214	258	301	331	274
Yes1	772.134	-0.537776	0.143922	-3.73659	0.00018653	0.00653683	606	927	911	631	783	1592	1807	1771	1924	1869	1816
Gtsf1l	167.62	0.700042	0.187363	3.73629	0.000186754	0.00653683	111	136	122	226	281	452	463	503	691	644	615
Rpl23	1739.33	0.42705	0.114415	3.73246	0.000189619	0.00662182	1347	1493	1356	1906	2951	1943	2319	1960	2455	2314	2413
Flvcr1	102.561	-0.882587	0.236616	-3.73004	0.000191452	0.00667045	101	118	126	69	90	189	217	102	118	146	119
Gm6477	1204.55	0.444098	0.119111	3.72845	0.000192663	0.00669726	822	1079	1005	1315	2075	473	542	534	647	558	642
Eftud2	1897.76	0.461332	0.123791	3.72669	0.000194009	0.00672861	1354	1603	1580	1988	3420	5714	5716	4616	5942	5652	5408
Dpp6	67.7044	-1.24451	0.334484	-3.72069	0.000198681	0.00687489	75	99	68	53	30	50	57	41	25	39	27
Baz2a	4368.01	0.366133	0.0985713	3.71439	0.000203693	0.00703228	3369	3938	3457	4914	6934	6534	7206	6243	7657	7410	7344
Gm14444	246.825	-0.697317	0.187823	-3.71263	0.000205119	0.00706542	196	290	321	176	246	43	42	52	42	53	33
Phf11d	205.918	0.649566	0.175029	3.71119	0.000206285	0.00708946	128	182	154	257	361	296	472	637	788	725	653
Rab30	53.4327	-1.20278	0.324342	-3.70836	0.000208604	0.00715294	59	65	65	35	34	109	133	76	93	89	88
Vegfa	376.631	0.633419	0.170907	3.70622	0.000210375	0.00719737	239	385	234	457	671	403	470	555	683	642	680
Gm5425	191.508	0.677905	0.182952	3.70537	0.000211082	0.00720533	142	155	127	239	341	179	191	165	221	201	206
Gm6560	3238.86	0.424043	0.11458	3.70087	0.000214866	0.00731798	2326	3208	2345	3896	5020	2943	3165	2558	3892	3319	3669
Scpep1	867.521	0.513324	0.138771	3.69907	0.000216388	0.00732047	690	730	611	949	1560	1881	2453	2153	2938	2358	2724
Sgsm1	93.6858	0.930145	0.251428	3.69944	0.000216072	0.00732047	70	63	55	118	192	164	187	127	191	146	226
Sohlh2	57.4716	1.21169	0.327473	3.70013	0.000215492	0.00732047	30	50	25	70	140	152	233	370	472	402	353
Nphs1	152.211	0.748485	0.202435	3.69741	0.00021781	0.00735219	106	106	116	184	291	378	323	280	303	322	296
Ctc1	1057.71	0.497566	0.134753	3.69243	0.000222117	0.00743846	776	938	787	1102	1958	1821	2324	1481	2166	1767	1999
Coro2b	104.513	0.890123	0.241083	3.69219	0.000222329	0.00743846	76	61	75	147	189	132	152	174	221	266	265
Fetub	39.7055	1.36845	0.370514	3.6934	0.000221279	0.00743846	27	21	18	70	74	116	162	131	180	151	213
Cntd1	22.11	2.01257	0.54494	3.69319	0.000221458	0.00743846	7	13	8	21	80	39	57	52	81	58	98
Ddit4	611.261	0.63422	0.171859	3.69034	0.000223955	0.00747634	329	650	422	732	1103	2910	2602	2060	3447	2192	3724
Memo1	215.765	-0.655272	0.177597	-3.68966	0.000224552	0.00747979	195	250	251	169	204	522	548	459	499	571	459
Pphln1	332.6	-0.61759	0.167456	-3.68808	0.000225955	0.00751001	292	351	420	252	337	896	891	471	539	505	552
Lrrc8c	139.621	-0.877016	0.238057	-3.68405	0.000229555	0.00761298	177	166	122	104	110	156	200	70	102	94	125
Pgap1	581.88	-0.57715	0.156792	-3.68098	0.000232335	0.00768837	460	666	729	422	638	1568	1483	1382	1714	1687	1601
Gm47341	96.3676	-0.905499	0.246268	-3.67689	0.000236093	0.00779571	86	131	111	68	79	100	73	43	40	46	53
Krt8-ps	94.7273	-0.910279	0.247768	-3.67392	0.000238861	0.00785288	85	122	115	67	77	69	167	32	57	43	50
Hnrnpa0	1351.34	-0.447217	0.121726	-3.67397	0.000238815	0.00785288	1198	1483	1483	1199	1366	3612	3664	3515	3877	3703	3652
Mtus2	51.1923	1.15518	0.314557	3.67241	0.000240273	0.0078822	33	32	29	75	104	68	115	113	188	123	157
Mfap3l	96.5845	-0.904217	0.246596	-3.6668	0.000245607	0.00803977	112	117	96	64	84	128	109	58	74	63	73
Grik3	106.501	-0.920682	0.251252	-3.66438	0.000247943	0.00806399	119	130	110	85	73	57	96	47	56	56	67
Kbtbd7	102.035	-0.873364	0.238293	-3.66508	0.000247263	0.00806399	98	123	123	61	100	291	268	346	309	362	340
Zic3	784.239	-0.53983	0.147302	-3.66478	0.000247555	0.00806399	612	958	915	661	767	1797	1940	1839	1866	2278	1985
Jmjd1c	2756.14	-0.403448	0.110147	-3.66282	0.00024945	0.00809565	2402	2952	3054	2374	3004	4487	4586	3553	3987	4651	4141
Hsh2d	38.6207	1.38875	0.379656	3.65791	0.00025428	0.00823476	18	24	23	45	104	97	116	116	164	112	143
Gm4631	159.703	-0.743917	0.203472	-3.65611	0.000256072	0.00827512	144	181	199	121	143	0	0	0	0	0	0
Kat2a	860.12	0.424184	0.116114	3.65318	0.00025901	0.00833996	616	795	676	1003	1376	1688	1543	1525	1865	1822	1627
Mink1	460.84	0.511773	0.140117	3.65247	0.000259729	0.00833996	355	391	335	538	782	848	835	739	938	827	930
Ak3l2-ps	67.7002	1.11663	0.305683	3.65288	0.000259312	0.00833996	40	55	33	76	166	118	79	166	156	175	131
Per1	208.873	0.662511	0.181459	3.65103	0.000261194	0.00836927	147	179	141	240	396	412	457	304	487	406	469
Exoc6b	252.293	-0.643223	0.176229	-3.64992	0.000262327	0.00838781	237	312	263	215	219	245	376	329	301	351	317
Ube4a	277.567	-0.616343	0.169159	-3.64358	0.000268869	0.00857889	248	306	333	224	264	500	551	454	440	495	420
Nudc	731.929	0.459184	0.126054	3.64275	0.000269745	0.00858876	559	588	597	873	1173	1764	1613	1859	2003	1933	1963
Gm47342	27.2627	-1.95164	0.53592	-3.64166	0.000270887	0.00860707	13	50	47	8	16	28	30	13	17	10	11
mt-Nd5	8726.6	-0.461419	0.126747	-3.64046	0.000272148	0.00862902	7028	9583	10455	7433	9100	16993	21971	17391	16442	16803	15949
Trim59	820.414	-0.620731	0.170587	-3.63879	0.000273917	0.00866698	589	1010	1054	565	905	2466	2489	2095	2287	2492	2291
Mcc	38.1651	-1.37921	0.379185	-3.6373	0.000275508	0.00869916	42	50	47	22	23	42	64	42	35	60	45
Fdxr	74.6497	0.962432	0.26525	3.62839	0.000285195	0.00898632	51	49	48	106	140	169	168	168	243	206	218
Btbd11	105.193	-0.846131	0.233287	-3.62699	0.000286739	0.00901622	102	129	121	77	88	146	128	129	150	221	126
Sntb1	41.5371	-1.32981	0.366838	-3.62508	0.000288875	0.00906457	47	55	48	26	24	75	75	45	48	52	46
Fzd6	95.5223	-0.875332	0.241635	-3.62254	0.000291729	0.00911639	96	112	113	63	86	181	201	86	90	99	83
Bcam	520.695	-0.605699	0.167183	-3.62298	0.000291226	0.00911639	529	640	490	470	434	737	746	576	639	734	652
Spats2l	50.8764	-1.22681	0.339156	-3.61725	0.000297746	0.00928528	47	84	53	29	37	75	62	25	32	27	31
Gm10052	1895.42	0.381931	0.105803	3.60982	0.000306404	0.00953565	1429	1750	1475	2254	2880	1153	1050	963	1327	1199	1172
Gm50452	21.9765	-2.03487	0.563947	-3.60826	0.000308254	0.00957357	14	32	42	8	10	76	82	57	62	67	51
Tenm3	714.435	-0.519418	0.144041	-3.60604	0.000310908	0.00963625	693	860	684	642	660	832	906	525	725	656	669
Zswim1	341.172	0.580694	0.161063	3.60539	0.000311681	0.00964048	237	301	248	368	647	656	691	691	851	739	857
Arpp19	349.886	-0.593353	0.164696	-3.60272	0.000314908	0.0097144	315	371	425	291	329	925	1147	985	965	999	934
Orc3	318.148	-0.571671	0.158694	-3.60235	0.000315353	0.0097144	287	386	339	220	364	809	909	773	1025	872	964
Tex14	446.766	0.553694	0.153883	3.59814	0.000320504	0.00985306	271	381	389	500	810	735	1131	814	1185	903	1056
Id3	112.769	-0.893366	0.248356	-3.59712	0.000321756	0.00987153	127	110	139	85	86	487	399	481	347	636	322
Sgsm2	311.658	0.627211	0.174567	3.59295	0.00032696	0.0100109	221	228	253	334	610	593	585	591	763	710	661
Ajuba	1464.01	-0.465605	0.129658	-3.59104	0.000329364	0.0100642	1376	1542	1597	1327	1414	3023	2605	2064	2179	2625	2040
Cdk14	64.8338	-1.07293	0.298836	-3.59037	0.000330211	0.0100698	61	100	67	41	50	74	80	20	23	19	31
Myo18a	732.893	0.472647	0.131834	3.58516	0.000336872	0.0102414	555	685	508	857	1210	977	1237	877	1341	959	1282
Capn11	30.4043	1.50093	0.418679	3.58491	0.000337189	0.0102414	18	14	16	40	79	93	109	56	89	71	78
Srsf2	1995.97	-0.38083	0.106247	-3.58437	0.000337895	0.0102423	1719	2240	2110	1720	2222	6305	6289	5804	5738	6833	5162
Rpl19	1563.29	0.445049	0.12427	3.58131	0.000341872	0.0103421	1224	1342	1182	1667	2747	1034	980	856	993	964	844
Nap1l2	66.1176	-1.10099	0.307854	-3.57633	0.000348454	0.0104785	54	91	88	47	43	107	122	118	83	128	77
Slc7a3	639.682	-0.548806	0.153436	-3.57677	0.000347869	0.0104785	625	740	647	587	556	2070	1641	1830	1788	2152	1580
Trappc13	377.694	-0.538702	0.150588	-3.57732	0.000347136	0.0104785	348	484	361	301	393	869	858	810	1039	1058	957
Igbp1	287.997	0.557993	0.156075	3.57516	0.000350019	0.0105047	198	231	237	353	482	664	694	583	819	750	780
Gm38162	20.4714	-1.93841	0.542627	-3.57227	0.000353903	0.0105682	23	26	31	6	12	20	36	20	11	18	12
Cul3	1075.85	-0.467215	0.130809	-3.57173	0.000354631	0.0105682	877	1223	1243	912	1123	2420	2649	2502	2626	2709	2425
Ndufv3	257.665	0.5795	0.16225	3.57165	0.000354743	0.0105682	192	206	192	319	433	574	693	674	905	822	920
Nol4l	167.021	0.759398	0.212626	3.57151	0.000354923	0.0105682	124	106	127	190	337	217	314	384	522	428	518
Ttc28	92.8148	-0.954958	0.267445	-3.57066	0.000356078	0.0105818	87	120	110	75	60	65	99	44	65	42	52
Ubox5	134.239	-0.838188	0.234944	-3.5676	0.000360264	0.0106644	159	177	111	95	117	155	194	135	145	136	150
Zfp644	775.007	-0.469431	0.131576	-3.56776	0.000360044	0.0106644	688	813	896	641	828	1538	1627	1099	1336	1404	1276
Gm28229	66.811	-1.03284	0.289773	-3.56432	0.000364802	0.0107777	70	76	84	45	50	195	188	129	124	186	142
Adk	371.454	-0.598273	0.167941	-3.56241	0.000367466	0.0108352	385	429	364	329	321	882	915	671	902	800	814
Rundc3b	46.2714	-1.2788	0.359611	-3.55607	0.000376442	0.0110784	60	50	54	30	27	51	99	77	94	78	91
Fzd10	109.493	-0.812224	0.228527	-3.55417	0.000379171	0.011137	100	142	124	73	104	216	224	151	197	246	152
Zfp942	133.52	-0.964377	0.271393	-3.55344	0.000380227	0.0111465	81	206	179	90	108	276	284	281	306	334	302
Mirg	749.688	-0.491896	0.138536	-3.55066	0.000384268	0.0112432	770	818	733	662	728	2333	2163	927	1036	982	874
Map4k5	431.184	-0.49363	0.139187	-3.54653	0.00039034	0.0113988	385	502	459	331	484	777	830	673	658	778	686
Tgfb2	23.4233	-1.76929	0.499301	-3.54354	0.000394794	0.0114935	25	35	30	12	10	15	26	4	6	12	7
Prc1	1391.07	0.392855	0.110871	3.54334	0.000395099	0.0114935	1030	1297	1081	1545	2278	2433	2701	2398	3064	2868	3006
Mat2a	1799.09	-0.525476	0.148396	-3.54103	0.00039857	0.0115723	1362	2027	2285	1445	1878	6114	5683	6113	4979	7843	4295
Gna13	945.73	0.478576	0.135317	3.5367	0.000405162	0.0117412	608	806	842	1031	1669	1831	2293	2133	2448	2287	2253
Dclk1	22.7951	-1.85426	0.524381	-3.53609	0.000406094	0.0117457	36	27	24	7	14	24	22	10	12	4	17
Itgb1	2345.92	-0.365985	0.103552	-3.53432	0.000408829	0.0118023	2056	2564	2478	2027	2640	4190	5010	3603	4661	4425	4566
Podxl	258.842	-0.608364	0.172174	-3.53343	0.000410201	0.0118194	243	343	245	186	278	376	364	218	342	263	345
Myl12a	319.043	-0.575103	0.162797	-3.53263	0.000411441	0.0118326	298	422	297	237	343	809	952	657	756	765	732
Uty	25.4228	1.95037	0.552252	3.53166	0.000412954	0.0118537	5	9	19	23	92	512	537	572	629	594	510
Pik3c2a	538.405	-0.510851	0.144708	-3.53021	0.000415227	0.0118739	432	668	595	443	557	898	1160	845	1068	907	932
Fam25c	59.6904	1.06283	0.301052	3.5304	0.000414926	0.0118739	42	42	30	80	125	166	219	368	336	374	344
Micall2	37.051	1.4766	0.419459	3.52025	0.000431148	0.012306	26	19	14	40	107	47	67	44	104	68	74
Tex2	520.145	0.482439	0.137106	3.51872	0.000433629	0.0123073	372	457	408	568	918	1032	1220	1159	1377	1319	1268
Gm2574	328.094	0.572277	0.162607	3.51938	0.000432559	0.0123073	254	280	219	437	508	1	0	0	0	1	0
Dhrs7	75.9453	0.957625	0.272151	3.51873	0.000433621	0.0123073	39	58	56	91	165	200	216	125	270	195	254
Socs6	218.056	-0.648658	0.184555	-3.51471	0.000440227	0.0124479	184	254	267	151	233	407	472	412	495	478	472
Hpcal1	132.611	0.775851	0.220729	3.51495	0.000439835	0.0124479	100	100	83	154	266	228	268	149	237	166	275
Gm5643	518.039	0.500124	0.142329	3.51385	0.000441667	0.0124654	382	493	351	620	853	2	2	2	5	1	2
Smim15	173.581	-0.695841	0.198318	-3.50871	0.000450284	0.0126849	152	194	219	123	174	462	498	451	487	537	543
Wbp2	418.123	0.500398	0.142687	3.50695	0.000453271	0.0127454	322	362	301	498	691	968	966	886	1097	963	1119
Bend3	652.214	-0.569125	0.162364	-3.50525	0.000456179	0.0127901	602	687	769	595	558	1876	1396	1116	1043	1429	933
Aplp1	195.218	0.65704	0.187456	3.50503	0.00045655	0.0127901	131	166	141	216	380	473	440	510	676	640	681
Mkrn1	2596.34	0.358341	0.102259	3.50425	0.000457895	0.0128015	1921	2479	2036	2949	4061	5709	5471	6103	7769	7153	7867
Gm20762	58.5476	1.05687	0.301634	3.50381	0.000458645	0.0128015	28	39	46	79	122	106	171	120	125	131	131
Pgm1	179.187	0.779803	0.222669	3.50207	0.000461662	0.012862	128	170	87	219	347	293	356	347	608	414	584
Serinc1	331.322	-0.56405	0.16124	-3.49821	0.000468397	0.0130228	267	420	369	257	346	1130	1224	1039	1184	1231	1091
Btnl7-ps	32.7643	1.43376	0.409907	3.49778	0.00046915	0.0130228	15	19	20	38	90	22	85	77	115	66	120
Gm18558	99.0718	0.873675	0.249851	3.49678	0.000470911	0.0130478	44	84	79	131	190	134	166	145	138	158	157
Tnrc6a	1122.52	-0.39406	0.112722	-3.49586	0.000472544	0.013068	1025	1206	1182	922	1294	1882	1895	1464	1514	1769	1433
Chaf1b	469.486	0.504657	0.144378	3.49539	0.000473366	0.013068	374	390	338	541	802	846	1022	851	1164	967	1120
Nanos3	25.3065	1.62659	0.465512	3.4942	0.000475488	0.0131027	9	15	14	54	42	79	72	83	73	93	96
Kif5c	289.389	-0.553383	0.158395	-3.4937	0.000476381	0.0131035	285	332	294	238	287	570	517	294	340	300	328
Tmsb4x	656.099	-0.499181	0.143179	-3.4864	0.00048957	0.0134419	553	847	660	571	645	2184	2007	2048	2142	2588	2260
Ilk	213.473	-0.636548	0.182626	-3.48553	0.000491159	0.0134611	236	235	210	157	218	350	401	261	340	316	333
mt-Nd3	811.852	-1.13396	0.325577	-3.48291	0.000495993	0.0135375	596	1075	1218	456	656	0	0	0	0	0	0
Arl5a	397.231	-0.513145	0.147383	-3.48172	0.000498196	0.0135375	337	462	448	306	437	860	915	822	997	917	910
Echdc2	393.47	0.554142	0.159144	3.48201	0.000497661	0.0135375	292	286	329	441	711	698	1021	976	1149	1158	1071
Capn5	212.602	0.622371	0.178744	3.4819	0.000497863	0.0135375	153	187	142	249	387	316	312	324	537	399	433
Mypn	37.5933	1.26996	0.364762	3.48161	0.00049841	0.0135375	23	25	18	56	80	71	102	103	136	139	110
Cdc37l1	689.959	-0.442677	0.127182	-3.48065	0.000500205	0.0135377	582	811	740	559	772	1187	1410	1565	1634	1733	1574
Gm37123	32.1746	1.43844	0.413214	3.48111	0.000499331	0.0135377	15	20	18	37	89	64	76	33	66	63	84
Gm14403	390.128	-0.502439	0.144408	-3.4793	0.000502723	0.0135816	352	433	432	319	409	519	499	590	556	691	540
4930453N24Rik	337.898	-0.57675	0.165978	-3.47486	0.00051112	0.0136667	284	372	418	246	369	745	830	830	841	1030	857
Thoc2	811.676	-0.523021	0.150515	-3.47487	0.000511098	0.0136667	623	930	1006	636	871	1839	1853	1797	1875	2078	1789
Kbtbd2	389.887	-0.508052	0.146122	-3.47689	0.000507258	0.0136667	332	472	420	305	425	597	698	521	619	676	573
Trio	613.718	-0.507413	0.146048	-3.4743	0.000512185	0.0136667	614	625	665	540	589	815	854	472	680	590	619
Rpl3-ps1	3934.02	0.359282	0.103402	3.47461	0.000511599	0.0136667	3017	3729	2989	4455	6175	2282	2522	2001	2936	2548	2877
Sfi1	146.456	0.739139	0.21268	3.47536	0.000510172	0.0136667	103	95	118	175	281	665	955	755	929	835	799
Ndufa4l2	27.8373	1.68711	0.485506	3.47495	0.000510939	0.0136667	4	24	14	38	77	40	46	52	97	67	124
Rgs3	96.9525	0.867999	0.250014	3.47181	0.000516963	0.0137699	71	79	50	139	170	80	108	55	97	55	104
Lbhd1	129.56	-0.86724	0.249969	-3.46939	0.000521636	0.0138457	94	164	181	98	102	264	265	264	199	357	178
Ube2k	1065.13	-0.404219	0.116499	-3.46972	0.000521008	0.0138457	906	1215	1139	870	1224	2647	2755	2134	2325	2487	2199
Gm10335	993.735	0.473584	0.136589	3.46723	0.000525854	0.0139333	800	852	706	1074	1759	2	2	0	1	1	1
Myo9a	699.27	-0.484084	0.139723	-3.4646	0.000531014	0.0140455	568	794	819	584	730	1184	1238	1174	1165	1399	1227
Mb21d2	102.189	-0.852681	0.246156	-3.46399	0.000532232	0.0140531	105	146	93	70	91	118	142	128	135	151	127
2210408I21Rik	31.4569	-1.4491	0.418452	-3.463	0.000534184	0.0140557	32	40	44	16	20	79	85	75	70	91	78
Cited2	134.095	-0.77592	0.224052	-3.46312	0.000533952	0.0140557	114	198	136	95	125	242	381	219	237	301	242
Map7	434.464	0.487437	0.140777	3.46247	0.000535242	0.0140592	285	412	339	513	719	677	699	1008	1015	1060	1058
Prr13	91.5386	0.855998	0.24742	3.45969	0.000540797	0.014156	60	78	53	115	181	294	263	307	332	406	348
Vill	73.9388	1.06093	0.306627	3.46	0.000540168	0.014156	45	61	37	76	186	154	182	127	260	128	225
Itgb8	24.2803	-1.6793	0.485678	-3.45763	0.000544946	0.01424	27	34	31	13	11	54	50	11	14	10	13
Mast4	349.277	-0.533178	0.154226	-3.45711	0.000545994	0.0142428	346	425	326	286	355	391	417	203	285	236	332
Orc4	250.457	-0.625319	0.181057	-3.4537	0.000552943	0.0143993	210	289	307	169	279	698	793	832	969	943	839
Gm13268	255.625	0.665866	0.192851	3.45275	0.000554903	0.0144256	192	221	157	271	516	139	165	122	172	156	149
Ankzf1	148.189	0.689099	0.199676	3.45108	0.000558342	0.0144901	95	134	100	196	252	276	346	311	434	372	419
H2az2	278.11	0.586747	0.170095	3.44952	0.000561585	0.0145338	210	214	211	307	519	939	1003	836	1127	947	1029
Mrps24	229.937	0.711696	0.206328	3.44935	0.000561944	0.0145338	167	143	190	248	470	1092	1169	1122	1550	1380	1271
Ubash3a	38.0526	1.25585	0.364298	3.44733	0.000566152	0.0146177	17	28	23	52	87	69	86	105	161	115	151
Arhgap35	1146.37	-0.432302	0.125464	-3.44563	0.000569724	0.0146814	1020	1251	1248	1034	1154	1836	2031	1576	1435	1914	1376
Hus1	359.64	0.557211	0.161734	3.44524	0.000570555	0.0146814	228	293	314	395	663	1228	1206	1458	1700	1714	1498
Tmed8	363.65	-0.511433	0.148501	-3.44397	0.000573244	0.0147256	349	404	381	308	364	707	799	559	582	721	591
4632427E13Rik	347.212	-0.617923	0.179577	-3.441	0.000579579	0.0148631	295	367	450	230	395	816	947	696	754	800	729
Smc1b	95.2124	1.00696	0.292835	3.43865	0.000584619	0.014967	47	65	76	91	243	230	266	506	703	448	660
Sall3	65.4218	-1.26864	0.369184	-3.43633	0.000589649	0.0150704	64	53	115	46	34	102	102	76	38	144	48
Gls	515.445	-0.498487	0.145098	-3.43553	0.000591406	0.0150898	415	627	576	394	579	1151	1249	1028	1254	1298	1224
A530083M17Rik	35.1419	-1.36342	0.397231	-3.43232	0.000598438	0.0152436	32	52	45	20	22	17	30	20	20	33	24
Etv1	79.2142	-1.02549	0.298982	-3.42993	0.000603731	0.0153375	80	74	117	57	55	157	164	102	93	142	122
Gm37245	111.804	-0.909177	0.265086	-3.42974	0.00060415	0.0153375	75	155	154	76	95	220	234	191	138	199	163
Ttc39c	30.1345	1.40548	0.409988	3.42809	0.00060784	0.0154054	16	17	17	40	75	167	188	202	229	249	236
Camk2d	90.9631	-0.906145	0.264408	-3.42707	0.000610135	0.015412	100	128	80	66	72	86	114	45	67	72	79
Mob1a	349.826	-0.534851	0.156049	-3.42745	0.000609278	0.015412	289	415	401	266	382	917	1008	1121	1264	1261	1161
Apobec3	567.146	0.47409	0.138389	3.42578	0.000613035	0.0154595	426	518	408	625	988	1278	1309	1554	1942	1835	1846
Ddah1	264.338	-0.585929	0.171189	-3.42271	0.000620007	0.0156093	272	289	274	224	245	448	449	417	498	499	440
Pros1	240.066	-0.595046	0.17394	-3.42098	0.000623952	0.0156826	240	303	222	187	242	217	332	253	355	308	365
Eno2	57.0003	1.214	0.354965	3.42007	0.000626049	0.0157093	26	59	20	75	132	44	51	56	120	66	118
Zmym3	413.078	0.514086	0.150484	3.41622	0.000634967	0.0159067	323	337	307	458	734	736	878	896	1066	1059	1037
Cotl1	296.26	0.543381	0.159266	3.41178	0.000645401	0.0161414	225	250	212	384	463	674	668	597	829	734	782
Abhd17c	276.066	-0.537473	0.157582	-3.41075	0.000647843	0.0161758	254	323	292	218	290	586	685	501	576	554	566
Xiap	463.871	-0.61363	0.179979	-3.40945	0.00065093	0.0162261	351	510	628	366	453	1179	1369	1229	1376	1366	1266
Tle6	67.8003	1.00525	0.294926	3.40847	0.000653277	0.0162579	48	55	30	90	139	148	157	221	208	284	191
Tra2b	737.719	-0.504226	0.147961	-3.40784	0.000654789	0.0162688	567	871	881	565	823	1476	1531	1395	1578	1737	1388
Abca7	177.684	0.699825	0.20546	3.40614	0.000658874	0.0163435	125	163	105	201	349	138	195	108	250	161	277
Sec14l2	43.3736	1.16215	0.34126	3.40546	0.000660538	0.016358	26	31	23	58	96	153	131	101	152	144	175
C030017G13Rik	99.3904	-0.805406	0.236639	-3.40351	0.00066525	0.0164214	93	123	115	67	94	126	116	96	92	100	80
Kank3	252.84	0.600074	0.176311	3.40351	0.000665265	0.0164214	175	245	160	304	444	410	468	447	569	544	575
Zfp628	77.8885	-0.910878	0.267794	-3.40141	0.000670381	0.016494	89	88	85	51	68	118	129	94	102	147	87
Kif21b	228.656	0.631584	0.185662	3.4018	0.000669429	0.016494	169	212	136	276	408	341	376	161	337	223	412
Col5a2	44.7188	-1.23584	0.363494	-3.3999	0.000674108	0.016532	61	55	42	27	30	45	79	22	26	29	23
Dtx1	108.275	0.804105	0.236493	3.40012	0.000673554	0.016532	67	102	62	152	187	182	194	143	234	183	221
Gm35066	17.5211	-1.98394	0.583803	-3.3983	0.000678067	0.0166022	21	26	22	5	10	33	16	7	14	12	13
Gpx4-ps2	1207.85	0.401003	0.11804	3.39718	0.000680842	0.0166433	940	1085	918	1324	2012	907	982	743	1005	960	1037
Map3k7	642.081	-0.442045	0.130147	-3.3965	0.000682541	0.016658	612	677	680	552	676	1094	1282	1003	1175	1183	1077
Aspscr1	395.971	0.507648	0.14951	3.39541	0.000685258	0.0166974	297	302	329	459	674	1116	1106	1031	1219	1352	1026
Ctnnd2	52.54	-1.11131	0.327517	-3.39314	0.000690961	0.0167744	57	62	64	37	34	60	78	35	26	44	33
Bmp1	75.0369	-1.01101	0.297915	-3.39362	0.000689741	0.0167744	87	112	60	51	57	49	106	36	52	37	31
Macroh2a1	713.084	0.437581	0.128972	3.39283	0.000691738	0.0167744	522	688	514	845	1134	873	1037	847	1267	976	1062
Gm20900	542.874	0.483024	0.142455	3.39071	0.00069711	0.0168507	438	451	394	612	932	1	5	3	7	5	6
Gm10284	480.278	0.506889	0.149483	3.39094	0.000696526	0.0168507	346	472	318	589	776	2	2	5	2	1	2
Tmem164	169.243	-0.645489	0.190482	-3.38871	0.000702233	0.0169475	158	213	175	130	165	281	294	239	321	271	273
Chordc1	381.19	-0.50658	0.149698	-3.38401	0.000714347	0.0172125	343	407	439	307	404	1142	1122	1403	1365	1727	1346
Prr5l	42.5044	-1.30203	0.384826	-3.38342	0.000715898	0.0172225	49	62	42	31	20	75	87	21	32	34	22
Mast3	214.054	0.594461	0.17586	3.3803	0.000724057	0.0173911	154	193	143	265	364	211	253	246	414	289	375
Gldc	1271	0.397822	0.117804	3.37698	0.000732855	0.0175746	977	1188	939	1535	1923	2474	2607	2431	3171	2813	3428
Npr3	27.4165	-1.6052	0.475407	-3.37649	0.000734182	0.0175786	32	25	45	11	18	55	54	22	21	34	20
Itpkb	62.88	-1.01812	0.301739	-3.37416	0.0007404	0.0176717	63	92	63	44	46	87	93	24	23	26	41
Prkd3	441.73	-0.469283	0.139066	-3.37454	0.000739383	0.0176717	413	491	462	377	457	740	779	653	813	767	761
Tmem167	338.519	-0.613206	0.18196	-3.37001	0.00075166	0.0177241	250	415	427	239	368	927	915	805	820	926	818
Prrg4	336.128	-0.567173	0.1683	-3.37001	0.000751668	0.0177241	273	380	414	275	331	674	691	326	408	444	418
Exoc5	376.129	-0.549538	0.162957	-3.3723	0.000745442	0.0177241	300	431	460	300	387	1064	1025	881	956	1030	844
Zfp131	406.508	-0.543113	0.161166	-3.3699	0.000751952	0.0177241	335	443	504	330	413	1087	979	1020	1020	1290	1044
Trim2	444.185	-0.498781	0.148005	-3.37004	0.000751584	0.0177241	387	525	476	392	430	803	900	717	840	986	789
Rab11fip1	550.014	0.437631	0.129837	3.37061	0.000750016	0.0177241	383	506	441	623	913	670	895	718	978	805	859
Fbxo15	668.075	0.457846	0.135753	3.37263	0.000744528	0.0177241	429	627	554	733	1157	2659	2534	3854	4202	4395	3873
Got1l1	247.287	0.740099	0.219564	3.37077	0.000749582	0.0177241	181	235	123	269	512	278	516	230	476	272	495
Gm42047	2932.52	-0.432396	0.128351	-3.36885	0.000754819	0.017764	2704	3246	3048	2771	2778	3133	2897	2003	2123	2540	2324
Pkm	7827.47	0.379476	0.11266	3.36833	0.000756244	0.01777	5868	7779	5647	9211	12001	18307	19621	16214	24037	21535	24155
Lysmd3	124.667	-0.803626	0.238724	-3.36634	0.000761733	0.0178712	113	132	169	73	132	326	362	314	333	324	350
Dynll2	575.306	0.480729	0.142843	3.36543	0.000764255	0.0179027	391	464	512	633	1008	1930	1845	1832	1616	1704	1442
Bmerb1	63.9788	-0.974413	0.2897	-3.36352	0.00076955	0.0179989	64	87	69	40	55	150	113	73	94	83	89
Icam1	180.791	0.666585	0.198441	3.3591	0.000781967	0.0182611	144	144	113	213	336	364	363	422	525	483	572
Jade1	3252.63	-0.412742	0.122897	-3.35844	0.000783829	0.0182765	2696	3504	3761	2869	3423	8906	8329	7021	6944	9202	6545
Mex3c	507.13	-0.511018	0.152225	-3.357	0.000787933	0.0183158	413	569	608	428	510	1021	1107	867	1043	905	977
Igf2bp2	761.66	0.44287	0.131923	3.35704	0.000787814	0.0183158	561	744	534	889	1234	1036	1126	1540	1980	1662	1794
Dclk2	683.274	0.483876	0.144231	3.35487	0.000794036	0.0184294	568	585	460	834	1089	757	1054	809	1185	869	1038
2810408A11Rik	65.3992	0.95179	0.284276	3.34811	0.000813634	0.0188554	43	47	41	80	139	176	190	100	153	99	135
Klhl11	247.176	0.561475	0.16778	3.3465	0.000818393	0.0189367	180	193	197	285	438	670	687	709	729	722	654
Col1a1	94.9805	-0.853423	0.255088	-3.3456	0.000821046	0.0189563	104	127	88	55	97	123	391	70	82	107	84
Hcn3	44.4762	1.16191	0.347321	3.34537	0.000821742	0.0189563	27	24	30	77	75	50	83	94	99	80	76
Slc17a7	18.8886	1.76016	0.526327	3.34422	0.000825136	0.0190057	6	12	9	26	53	41	69	66	101	91	101
Sertad4	69.9024	-0.932566	0.279063	-3.34178	0.000832432	0.0190867	67	89	82	49	56	79	91	49	62	46	58
Brcc3	159.769	-0.704493	0.210796	-3.34206	0.000831584	0.0190867	126	195	203	111	162	534	521	446	431	516	465
Rap1b	550.603	-0.530966	0.158852	-3.34252	0.000830203	0.0190867	419	693	634	395	635	1875	1807	1629	1819	1886	1668
Rpl23a	478.992	0.509472	0.152503	3.34073	0.000835573	0.0191298	396	386	338	542	834	114	101	97	128	128	102
Med14	768.182	-0.464605	0.139099	-3.34009	0.000837498	0.019145	608	901	881	650	806	2070	1860	1408	1530	1846	1312
Cpn1	16.8489	1.85002	0.554033	3.33918	0.000840249	0.0191789	6	11	6	26	45	83	67	85	123	107	100
Igdcc4	142.08	-0.69299	0.207574	-3.33852	0.000842245	0.0191956	131	173	158	114	126	164	209	63	84	87	122
Tet3	137.076	-0.77697	0.232804	-3.33745	0.000845515	0.0192123	145	180	127	116	103	205	176	109	141	123	140
Gstp-ps	393.561	0.525787	0.157528	3.33774	0.00084463	0.0192123	321	337	259	476	652	533	537	664	775	833	832
Asb7	126.076	-0.709345	0.2128	-3.33338	0.00085797	0.0194661	119	157	136	90	124	206	217	137	173	182	217
Perp	104.472	-0.795612	0.238934	-3.32984	0.000868957	0.019686	92	126	129	79	89	162	192	149	142	167	136
Pmaip1	794.904	-0.506882	0.152495	-3.32393	0.000887586	0.020078	694	779	1003	607	886	1298	1571	1157	1369	1407	1314
Calm1	989.901	-0.400441	0.12049	-3.32345	0.000889125	0.0200828	875	1121	1025	888	1036	2443	2519	2363	2644	2944	2396
Mapk4	91.3161	-0.895474	0.269652	-3.32085	0.000897422	0.0201203	109	121	77	67	72	86	97	34	57	57	98
Glis2	408.714	-0.509795	0.15349	-3.32135	0.000895844	0.0201203	390	446	437	365	385	449	501	465	496	589	473
Srsf1	3356.54	-0.468104	0.140891	-3.32245	0.000892313	0.0201203	2461	4023	4002	2715	3673	12174	11281	11186	11943	13454	11216
Ssbp3	683.344	-0.422427	0.127182	-3.32143	0.00089559	0.0201203	643	732	713	596	722	1367	1340	594	836	682	796
Proca1	20.1123	1.72272	0.51874	3.32097	0.000897058	0.0201203	10	12	7	25	59	31	37	58	73	49	66
Klhl26	109.584	-0.771529	0.232476	-3.31874	0.000904237	0.0202133	123	131	106	76	104	122	183	82	128	98	136
Rpl38-ps1	482.481	0.566906	0.170811	3.3189	0.000903734	0.0202133	422	373	307	564	848	0	1	3	1	2	1
Gm8566	617.709	0.455376	0.137458	3.31284	0.000923541	0.0206144	456	601	428	723	1007	635	722	658	759	812	778
Fmr1	696.887	-0.508112	0.153489	-3.3104	0.000931616	0.0207641	519	844	833	548	756	1412	1650	1455	1716	1731	1585
Sox1	33.4918	-1.46057	0.441454	-3.30853	0.000937861	0.0208726	44	29	48	21	16	19	27	18	19	26	12
Cntrob	328.273	0.539047	0.163057	3.30588	0.000946788	0.0210404	213	283	272	351	611	627	746	522	705	630	642
Stag1	996.485	-0.387162	0.117262	-3.30168	0.000961063	0.0213263	865	1087	1079	833	1137	1744	1903	1503	1734	1793	1593
Bmpr1a	716.636	-0.414882	0.12575	-3.29927	0.00096937	0.0214478	611	839	751	570	836	1466	1613	1324	1594	1469	1496
Fam162a	232.695	0.599894	0.181816	3.29945	0.000968754	0.0214478	167	221	145	274	416	512	620	512	838	631	806
S100a13	30.4763	-1.47257	0.446516	-3.2979	0.000974103	0.0215211	42	45	25	17	17	31	49	23	30	30	40
Rnpc3	157.071	-0.788516	0.239264	-3.29559	0.000982157	0.0216046	111	224	192	128	123	568	581	529	608	712	603
Yipf6	166.683	-0.627709	0.190427	-3.29632	0.000979611	0.0216046	158	204	173	129	164	414	478	355	401	399	384
Zfp36l1	362.578	-0.55525	0.168469	-3.29587	0.00098119	0.0216046	354	392	393	330	317	604	602	523	457	622	421
Bcas3	447.518	0.456252	0.138481	3.2947	0.000985274	0.0216418	338	401	333	512	745	781	844	888	842	1023	791
Arhgap45	182.508	0.63447	0.192638	3.29358	0.000989199	0.0216965	143	151	116	220	326	277	294	126	254	187	284
Sipa1l1	873.824	0.398332	0.121232	3.2857	0.00101729	0.0222483	638	845	657	1028	1360	1147	1999	1081	1420	1187	1302
Dppa3-ps	175.129	0.628828	0.191361	3.28608	0.00101593	0.0222483	101	151	146	214	309	433	353	417	482	380	372
Gm47939	268.554	-0.579845	0.176714	-3.28125	0.00103347	0.0225695	282	289	275	234	242	89	105	56	59	67	50
Tmem165	400.137	-0.539693	0.164556	-3.27969	0.00103921	0.0226298	310	467	489	325	408	1273	1170	821	1027	1054	987
Rpl5-ps2	822.377	0.403086	0.122903	3.27971	0.00103915	0.0226298	646	684	666	974	1274	12	14	6	11	17	13
Septin1	344.311	0.487661	0.148793	3.27744	0.00104753	0.0227782	236	322	261	429	540	640	772	1078	1205	1299	1185
Zbp1	31.5246	1.50112	0.458164	3.27639	0.00105145	0.0228306	8	19	24	33	94	120	147	104	161	124	142
Gm15484	995.882	0.41077	0.125392	3.27588	0.00105333	0.0228387	761	863	794	1052	1723	485	528	503	696	581	740
Ccdc117	457.076	0.618554	0.188914	3.27425	0.00105941	0.0229051	289	388	364	423	982	1342	1641	1768	2183	1890	1916
Ifi30	236.571	0.647775	0.197837	3.27429	0.00105927	0.0229051	188	214	128	291	419	337	393	265	393	301	458
Slc25a11	278.857	0.52305	0.159873	3.27167	0.00106915	0.0230827	212	235	205	323	480	795	816	730	802	936	764
Tmem184b	295.083	0.542855	0.165948	3.27124	0.00107078	0.023085	222	262	203	326	536	388	467	427	592	496	484
Trim25	940.256	0.42302	0.129337	3.2707	0.00107284	0.0230964	643	799	838	1017	1609	2439	2674	2945	3459	3273	2934
Coasy	152.632	0.720093	0.220282	3.26896	0.00107942	0.0232053	115	136	83	178	296	300	327	265	431	314	417
Slc38a2	2950.25	-0.382738	0.117184	-3.26612	0.0010903	0.023406	2454	3195	3324	2606	3192	10155	8576	6721	7459	8240	6642
Pfkm	250.572	0.582413	0.178446	3.26379	0.00109931	0.023566	184	220	172	269	477	516	724	469	662	550	636
Psap	790.437	0.396559	0.121607	3.26098	0.00111028	0.0237675	585	731	618	870	1308	1561	1790	1697	2147	1932	1984
Gm11826	380.916	0.589809	0.181015	3.25835	0.00112061	0.0239549	313	305	249	395	747	337	389	311	458	394	395
Stat2	237.154	0.569112	0.174721	3.25727	0.00112491	0.0240129	171	210	167	262	438	377	446	375	564	427	558
Pak4	472.73	0.44089	0.135574	3.25202	0.00114589	0.0244263	348	440	352	559	755	712	768	744	1005	848	896
Meis1	43.2466	-1.18019	0.363023	-3.25101	0.00114994	0.0244782	43	54	57	18	41	47	59	34	27	61	28
Prss23	17.8807	-1.92564	0.592854	-3.24809	0.00116183	0.0246966	24	25	20	10	5	27	43	7	5	5	3
Rpgrip1l	138.852	0.773814	0.238343	3.24664	0.00116775	0.0247877	77	101	121	144	302	376	512	393	526	445	513
Has2	38.6561	-1.25492	0.386777	-3.24455	0.00117635	0.0249005	33	47	59	23	26	87	71	10	25	20	29
Psmb6	612.654	0.477788	0.147254	3.24464	0.00117597	0.0249005	478	472	499	652	1100	2724	2749	2369	2892	2966	2761
Rac1	702.019	-0.396907	0.122346	-3.24415	0.00117802	0.0249011	617	810	716	600	777	1477	1352	1140	1258	1412	1133
Gipc1	455.628	0.445264	0.137412	3.24035	0.00119382	0.0252	346	412	337	543	724	572	821	616	895	747	974
Zfp709	90.9009	-0.83672	0.258311	-3.23919	0.00119869	0.0252323	81	111	112	72	70	212	191	183	162	227	193
Plekha1	1254.69	-0.40121	0.123849	-3.23952	0.00119732	0.0252323	1021	1399	1419	1051	1411	2667	2584	1426	1985	1756	1873
Zscan5b	28.1251	1.34232	0.414912	3.23519	0.00121562	0.0255534	15	18	15	42	62	107	136	129	186	182	157
Gm14406	203.13	-0.653956	0.202232	-3.23369	0.00122201	0.0256091	158	231	269	147	208	7	13	17	8	21	16
Pou3f1	208.725	-0.65339	0.202094	-3.23309	0.00122458	0.0256091	220	191	255	144	222	677	602	176	278	262	270
Rfx7	807.9	-0.39775	0.123007	-3.23356	0.00122257	0.0256091	714	861	885	679	908	1673	1664	1610	1807	1873	1640
Crocc	483.521	0.455806	0.141003	3.23259	0.00122672	0.0256091	319	476	371	591	756	724	801	778	853	800	813
Treml2	41.4449	1.13186	0.35013	3.23268	0.00122635	0.0256091	25	24	28	54	92	138	143	183	188	168	197
Ccdc61	108.963	0.71673	0.221891	3.23011	0.00123744	0.0257974	74	83	81	142	191	228	288	203	262	245	284
Tmem123	342.792	-0.540606	0.167475	-3.22799	0.00124665	0.0259166	278	393	413	244	394	645	848	575	678	598	656
Chmp2a	263.4	0.538128	0.166712	3.22789	0.00124707	0.0259166	194	242	179	307	456	624	670	496	754	610	688
Txlnb	77.216	0.91196	0.28255	3.22761	0.00124829	0.0259166	38	53	67	90	167	112	170	141	160	137	173
Erbb3	687.206	0.394107	0.122139	3.22671	0.00125224	0.0259631	497	603	580	812	1061	1099	1173	1295	1317	1452	1244
Bin2	69.7307	0.940383	0.29152	3.22579	0.00125626	0.0260108	48	37	54	86	146	174	198	178	260	183	230
Dab1	93.3118	-0.859987	0.26664	-3.22528	0.00125852	0.0260196	90	94	127	72	72	140	141	146	109	154	130
Smg6	837.801	0.462645	0.14346	3.22491	0.00126012	0.0260196	581	652	766	900	1480	1694	1642	1478	1635	1694	1539
Gm20008	196.01	-0.74084	0.230021	-3.22075	0.00127857	0.0262663	139	224	285	127	204	403	378	409	394	423	351
Kat6b	2307.65	0.330034	0.102474	3.22065	0.001279	0.0262663	1733	2090	1936	2512	3680	3447	4212	4595	4678	4966	4328
Acly	2616.95	0.364031	0.113	3.22151	0.00127515	0.0262663	1967	2346	2146	2717	4454	7681	7905	6503	8424	7571	8098
Platr14	184.634	0.704745	0.218805	3.22088	0.00127796	0.0262663	92	136	180	227	340	593	622	534	650	667	682
Naf1	540.128	-0.472299	0.146704	-3.21941	0.00128455	0.0263397	428	625	630	431	597	1297	1283	1192	1326	1450	1312
Spdl1	264.164	0.582476	0.180945	3.21907	0.00128605	0.0263397	191	202	212	275	514	763	865	838	922	954	910
Gapdh-ps16	643.065	0.442953	0.137666	3.21759	0.00129273	0.0264408	511	583	450	794	983	67	107	51	81	57	95
Stac2	93.5593	0.794235	0.246956	3.2161	0.00129945	0.0265424	70	66	62	112	185	204	180	220	304	262	299
Miip	309.503	0.529122	0.164705	3.21255	0.00131561	0.0268364	252	256	212	359	534	523	647	434	555	543	673
Ggt1	31.1357	1.29897	0.404489	3.21139	0.00132094	0.0269089	16	16	22	42	73	79	80	92	146	131	126
Catsperg2	37.8597	1.20715	0.376017	3.21036	0.00132569	0.0269693	21	30	18	46	92	15	22	18	23	16	23
Fign	50.7065	-1.07693	0.335725	-3.20777	0.0013377	0.0271618	56	53	66	35	35	130	81	33	35	58	45
Ascc2	387.982	0.453482	0.14138	3.20754	0.00133874	0.0271618	267	341	324	453	633	862	905	806	997	956	918
Aftph	428.799	0.454642	0.14176	3.20712	0.00134072	0.0271657	306	385	339	469	742	879	1117	986	1248	1064	1140
Eif1ax	668.713	-0.450162	0.140391	-3.2065	0.00134362	0.0271765	532	764	776	548	735	2153	2250	1684	2140	1937	1997
Prr15l	21.8252	1.54989	0.483398	3.20624	0.00134484	0.0271765	12	14	8	31	55	30	47	25	63	40	64
Ppp1cb	1536.84	-0.476421	0.148622	-3.20559	0.00134788	0.0272016	1106	1999	1722	1254	1655	4251	4592	4493	5315	5337	5089
Cct4	3068.59	0.415545	0.129683	3.20431	0.00135384	0.0272857	2226	2816	2422	3034	5613	10366	11243	9763	12816	11813	12025
Zc3h12c	100.332	-0.771944	0.240941	-3.20387	0.00135593	0.0272915	97	112	121	77	86	179	179	111	111	142	118
Arih1	1175.04	-0.378816	0.118253	-3.20343	0.00135799	0.0272967	974	1339	1265	963	1377	2337	2525	2308	2595	2661	2465
Mov10	847.985	0.42371	0.132295	3.20277	0.00136111	0.0273232	649	822	586	997	1345	1296	1619	1603	1946	1990	1837
Mfhas1	52.9861	-1.01209	0.316401	-3.19877	0.00138016	0.027669	51	66	66	33	44	74	74	39	41	28	87
Tubg1	255.87	0.556859	0.174179	3.19704	0.00138845	0.0277984	189	222	182	275	479	659	654	589	725	641	637
Alkbh5	1160.19	0.48842	0.152891	3.19456	0.00140045	0.0280016	717	1147	913	1164	2198	2513	2674	2717	3561	3011	3270
Tgfb1i1	25.4384	-1.55397	0.486579	-3.19366	0.00140482	0.0280519	37	35	22	14	13	32	26	7	15	17	16
Cdc73	795.393	-0.448805	0.140578	-3.19257	0.00141013	0.028121	633	885	944	633	900	2277	2254	2136	2277	2339	2016
Mtmr3	633.471	0.461019	0.144437	3.19182	0.00141377	0.0281565	444	552	522	646	1164	1265	1414	1120	1441	1288	1290
Fabp3	452.323	0.506251	0.158679	3.19042	0.00142068	0.0282346	387	352	317	531	760	480	722	564	929	707	872
Tmem191c	47.7584	1.0714	0.335833	3.19027	0.00142142	0.0282346	28	42	22	64	101	99	145	223	230	206	195
Ptar1	563.526	-0.458505	0.143874	-3.18685	0.00143832	0.0284128	468	614	663	440	643	1419	1442	1171	1269	1306	1353
Gm15500	3770.08	0.326632	0.102489	3.18698	0.00143766	0.0284128	2982	3473	2951	4358	5655	1702	1955	1576	2169	2034	2201
Eif4a-ps4	5092.96	0.329672	0.103413	3.18793	0.00143294	0.0284128	3872	4677	4163	5363	8366	10722	10320	10415	12713	13128	12521
Rpl3-ps2	1644.39	0.362232	0.11367	3.18669	0.00143912	0.0284128	1306	1518	1233	1845	2609	14	10	5	3	3	4
Tnk1	108.299	0.766684	0.240599	3.18656	0.00143976	0.0284128	66	101	68	122	222	265	251	187	203	212	215
Paip1	293.029	-0.536863	0.168618	-3.18391	0.00145302	0.0286371	232	365	331	238	300	657	737	638	659	705	659
Ube2d1	107.933	-0.776084	0.243836	-3.18281	0.00145855	0.0286766	88	160	113	77	100	324	305	181	264	208	204
Klhl9	492.663	-0.430673	0.135314	-3.18276	0.0014588	0.0286766	423	590	506	404	551	1110	1174	1062	1271	1273	1163
Nmt1	1063.4	0.377773	0.118734	3.18168	0.00146426	0.0287465	794	950	870	1132	1788	2938	2796	2674	3212	3107	2929
Oas1a	101.963	0.73931	0.232773	3.1761	0.00149271	0.0292672	69	88	65	125	192	133	175	139	190	188	162
Tmc6	159.772	0.662387	0.208593	3.1755	0.00149578	0.0292894	91	123	144	186	300	405	339	403	488	420	412
Socs7	358.268	0.477013	0.150235	3.1751	0.00149783	0.0292918	234	345	279	413	602	709	770	648	862	786	802
Gm2027	100.07	-0.782031	0.24634	-3.1746	0.00150044	0.029305	89	110	132	68	96	83	114	153	151	188	150
Dcun1d1	130.38	-0.701398	0.221002	-3.17372	0.00150501	0.0293186	112	146	167	94	128	344	319	257	269	268	268
Zfyve26	503.266	0.422107	0.132992	3.17392	0.00150398	0.0293186	371	452	396	619	761	646	764	684	765	789	691
Arhgef5	80.5818	-0.869634	0.274506	-3.168	0.00153494	0.0298251	76	104	91	66	57	104	109	56	70	77	65
Hif1a	804.854	-0.429216	0.135481	-3.16808	0.00153448	0.0298251	659	896	922	703	844	2196	2162	2027	2014	2190	1727
Gm12816	793.267	0.395997	0.12504	3.16697	0.00154035	0.0298671	617	737	584	903	1272	206	233	206	240	212	266
Llgl2	577.63	0.43469	0.137263	3.16684	0.00154104	0.0298671	414	502	479	611	1014	1191	1278	1265	1473	1763	1366
Wdr1	744.688	-0.388467	0.12288	-3.16134	0.00157043	0.0303977	699	797	762	650	812	1365	1499	1371	1371	1702	1276
Hecw2	135.161	-0.691911	0.219059	-3.15856	0.0015855	0.0306504	120	169	151	114	113	331	298	330	318	360	290
A930024E05Rik	39.76	-1.14994	0.364126	-3.15808	0.00158812	0.0306618	40	56	45	22	32	73	71	36	48	64	70
Zfp69	51.1407	1.00656	0.318889	3.15646	0.00159698	0.0307936	30	43	28	65	109	92	147	77	127	82	92
4930522L14Rik	105.378	-0.843357	0.26731	-3.15498	0.00160509	0.0309107	70	149	139	73	94	135	144	133	136	177	152
Slc39a14	607.015	-0.48984	0.155378	-3.15256	0.00161843	0.0311106	650	605	615	543	581	1401	991	825	887	1075	806
Eif4g2	8839.05	-0.348376	0.110513	-3.15236	0.00161958	0.0311106	7528	9404	9701	8030	9577	22824	20422	20406	21663	25068	19878
Arhgap30	33.7592	1.24906	0.39636	3.15134	0.00162525	0.03118	19	20	21	39	86	184	107	108	186	104	175
Eml1	64.0805	-0.950534	0.301745	-3.15012	0.00163202	0.0312417	78	80	59	45	50	75	90	40	77	47	60
2410006H16Rik	443.37	0.525154	0.166714	3.15002	0.00163258	0.0312417	349	372	314	449	851	996	1196	848	1397	1026	1388
Cenpp	88.4267	-0.811266	0.257629	-3.14897	0.00163846	0.0313146	84	96	113	66	75	282	333	232	316	278	270
Prlr	39.6467	-1.17758	0.374107	-3.14771	0.00164556	0.0314106	39	46	55	26	26	30	55	16	27	28	32
Hdgfl3	98.972	-0.767387	0.243907	-3.14622	0.00165395	0.0314802	97	109	120	61	104	288	236	153	197	140	176
Tmem33	207.643	-0.596688	0.189631	-3.14657	0.00165196	0.0314802	175	226	261	161	210	646	616	682	624	711	634
Ndufb7	205.35	0.579864	0.18432	3.14596	0.00165543	0.0314802	148	178	145	285	305	650	689	599	720	697	653
Samd12	40.2415	-1.16644	0.370932	-3.14462	0.00166305	0.0315376	46	56	40	27	26	43	70	22	29	32	35
Fam102b	62.9086	-0.931507	0.29633	-3.14348	0.00166951	0.0315376	72	67	73	41	54	138	140	87	102	80	97
Pim2	214.261	-0.638072	0.202999	-3.14323	0.00167093	0.0315376	197	203	285	152	226	1059	673	248	366	391	400
Cfl2	231.765	-0.625142	0.198876	-3.14338	0.00167009	0.0315376	175	299	277	150	267	404	620	573	658	625	607
Pcgf2	567.122	0.446582	0.142028	3.14432	0.00166475	0.0315376	465	485	407	637	953	1284	1357	1236	1336	1482	1324
Rfx2	326.837	0.478053	0.152055	3.14395	0.00166684	0.0315376	232	306	242	373	554	491	446	539	571	603	515
Gm6083	471.826	0.481196	0.15312	3.1426	0.00167456	0.0315668	353	448	323	508	842	488	690	796	1071	925	1100
Gm8172	1916.46	0.339863	0.108184	3.14152	0.00168075	0.0316441	1472	1831	1470	2148	2995	1303	1392	1142	1658	1596	1585
Myrf	600.272	0.442651	0.14105	3.13824	0.00169964	0.0319599	394	530	524	776	872	1812	1256	965	1088	1344	1138
Zfp442	63.934	-0.963333	0.307241	-3.13543	0.00171604	0.0321885	50	95	77	35	62	93	104	72	103	72	87
Septin7	692.27	-0.477155	0.152168	-3.13571	0.00171441	0.0321885	531	781	847	574	733	2189	2339	2174	2690	2735	2426
Qk	1407.55	-0.391643	0.125024	-3.13255	0.00173295	0.0324656	1142	1546	1607	1208	1558	2591	2824	2840	2841	3129	2843
Atp6v0a4	31.6986	1.41046	0.450326	3.13208	0.00173573	0.0324773	11	32	11	39	84	60	92	117	159	136	163
Bhlha15	20.9003	1.52991	0.48855	3.13154	0.00173893	0.0324971	10	15	8	33	48	30	54	44	63	62	71
Trim35	298.44	-0.514354	0.16433	-3.13001	0.001748	0.0326265	303	303	321	250	301	504	585	383	498	465	458
Ccdc136	109.621	0.720128	0.230196	3.12832	0.00175808	0.032734	58	100	84	141	196	192	265	205	305	235	296
Acsf2	97.2516	0.766333	0.244966	3.12833	0.00175804	0.032734	64	62	82	122	182	239	206	206	208	230	215
Btaf1	1154.9	-0.424887	0.135952	-3.12528	0.00177638	0.0330342	902	1302	1355	923	1330	2616	2646	2480	2610	3030	2409
Abi1	380.585	-0.446328	0.142832	-3.12484	0.00177901	0.0330426	339	434	401	317	413	807	937	838	961	960	911
Gm7336	498.835	0.446514	0.143012	3.12221	0.001795	0.0332987	381	474	345	604	781	0	1	0	0	2	0
Magi3	205.858	-0.552822	0.177148	-3.12068	0.00180436	0.0334109	186	240	224	169	205	292	332	245	291	292	278
Brca1	1509.77	0.373596	0.119735	3.1202	0.00180729	0.0334109	1092	1383	1248	1560	2596	2762	3075	3492	3890	4082	3613
Slc38a10	613.308	0.426673	0.136748	3.12014	0.00180766	0.0334109	401	532	555	695	1010	1266	1353	1231	1575	1435	1457
Dusp4	137.148	-0.687506	0.220607	-3.11643	0.00183057	0.0336726	145	180	120	107	126	199	206	89	114	93	116
Aen	539.49	-0.443813	0.142412	-3.1164	0.00183071	0.0336726	498	553	604	473	555	862	831	630	648	712	565
Rpl19-ps7	693.619	0.414914	0.133134	3.11652	0.00182998	0.0336726	529	587	565	734	1201	3	1	4	3	3	3
Rpl19-ps6	237.899	0.545254	0.174962	3.11641	0.00183068	0.0336726	193	192	165	284	404	8	8	3	5	5	6
Plxnb1	419.382	-0.469318	0.150763	-3.11295	0.00185227	0.0340279	423	453	416	372	415	682	590	380	438	495	493
Plin3	371.912	0.454106	0.14594	3.1116	0.00186077	0.0341426	288	312	289	426	617	1004	1134	872	1131	1118	1191
Igf2r	1337.05	0.334217	0.107426	3.11115	0.00186361	0.0341535	1008	1222	1103	1481	2104	2221	2685	2322	3005	2531	2843
Ptprg	843.192	-0.371259	0.119347	-3.11075	0.0018661	0.0341578	733	937	886	736	935	1257	1573	1223	1337	1490	1209
Chic2	225.54	-0.596411	0.191821	-3.1092	0.00187594	0.0342964	190	239	289	185	215	520	527	404	409	459	355
Adamts6	40.1494	-1.20459	0.387477	-3.10882	0.00187839	0.0342998	28	58	59	22	31	87	87	34	75	46	58
Acot1	126.491	0.736951	0.237245	3.10629	0.00189451	0.0345525	74	119	85	132	269	276	401	338	521	379	555
Naga	97.6168	0.741862	0.238916	3.10512	0.00190201	0.0346476	65	76	71	112	194	97	158	92	165	105	177
9630028I04Rik	44.302	1.24754	0.40189	3.10418	0.00190809	0.0347166	18	33	29	38	131	93	140	160	208	153	266
mt-Ti	34.9994	-1.34098	0.432628	-3.09961	0.00193775	0.035214	25	40	63	17	26	86	97	117	119	128	115
Nhs	76.7001	-0.857088	0.276613	-3.09851	0.00194497	0.0353029	78	90	88	62	56	119	147	43	88	67	108
Lgr4	1124.87	-0.408676	0.1321	-3.09368	0.00197689	0.0357539	879	1289	1287	939	1261	2633	2432	2055	2375	2544	2229
Mprip	1037.39	0.369716	0.119499	3.09389	0.00197549	0.0357539	734	995	838	1116	1720	1854	1960	1513	1929	1806	1747
Gm6992	551.65	0.463108	0.149671	3.09417	0.00197362	0.0357539	392	566	369	650	899	13	12	9	14	7	12
Gm47026	44.775	-1.15105	0.372325	-3.09153	0.00199126	0.0359709	35	79	47	29	31	22	21	15	8	14	11
Myh7b	23.9272	1.41641	0.458567	3.08876	0.00200991	0.0362645	16	12	11	39	50	31	51	75	89	62	62
Igfbp3	153.879	-0.616294	0.199557	-3.0883	0.00201302	0.0362775	133	197	165	117	156	308	343	326	244	365	249
H2bc18	690.048	-0.415428	0.13457	-3.08708	0.0020213	0.0363667	636	824	654	625	704	4021	3955	3004	3977	3573	3433
Marcksl1	1260.67	-0.35045	0.113529	-3.08687	0.00202277	0.0363667	1134	1418	1248	1143	1368	2093	2132	1656	1907	1960	1795
AW146154	51.529	-1.01015	0.327387	-3.0855	0.0020321	0.0364911	46	61	71	32	43	82	86	72	79	98	75
Lrfn4	127.312	-0.687994	0.22309	-3.08393	0.00204284	0.0366406	127	128	156	88	131	247	261	116	164	127	170
Tfap2c	517.615	0.436947	0.141733	3.08289	0.00205002	0.0367259	360	468	424	544	915	785	741	737	1022	764	819
Flna	5359.75	-0.368279	0.119535	-3.08094	0.00206347	0.0368958	5232	5893	5044	5027	5482	7376	8051	4695	6184	5958	6437
Mrnip	56.0397	0.913473	0.296504	3.08081	0.00206437	0.0368958	34	41	39	76	107	131	193	166	236	199	245
Tcte2	19.5788	-1.72617	0.560783	-3.07814	0.00208298	0.0371846	26	29	20	4	16	34	43	10	18	20	18
Cpsf6	1699.57	-0.385589	0.125325	-3.07671	0.002093	0.0373194	1327	1985	1884	1464	1885	4940	5171	4553	5394	5188	5117
Git1	706.279	0.385946	0.125463	3.07616	0.00209683	0.0373439	559	620	548	794	1137	1385	1295	1133	1537	1382	1390
Nkrf	184.094	-0.576498	0.187457	-3.07535	0.00210255	0.0374016	159	212	214	145	187	467	398	424	346	527	363
Firre	1097.72	-0.411192	0.133782	-3.0736	0.00211492	0.0374897	1023	1221	1106	1040	1062	929	1109	604	790	735	873
Ddx3x	4309.67	-0.383683	0.12483	-3.07365	0.00211457	0.0374897	3361	4781	5006	3623	4906	14877	13973	13219	13755	16106	12801
Gm9354	224.473	0.530748	0.172649	3.07414	0.00211111	0.0374897	166	201	158	259	390	0	1	1	1	1	0
Dock11	356.616	-0.498565	0.162269	-3.07246	0.002123	0.037589	291	459	370	310	352	586	769	537	678	528	606
Cdh2	90.9678	-0.784076	0.255484	-3.06898	0.00214792	0.0379554	99	92	107	68	79	162	144	84	69	69	65
Klf5	1740.5	-0.381969	0.12448	-3.06852	0.00215121	0.0379554	1472	2096	1741	1617	1779	2439	2939	2627	3331	2968	3153
Phrf1	1145.65	0.34251	0.111613	3.06871	0.00214982	0.0379554	879	999	964	1302	1769	1910	1961	1695	2128	2216	2112
Cpeb1	109.49	-0.69275	0.225929	-3.06622	0.00216781	0.0381808	102	129	125	80	107	180	191	80	151	93	151
Xrcc1	350.861	0.462397	0.15082	3.06588	0.00217031	0.0381808	267	317	255	395	595	732	748	674	835	778	803
N4bp3	212.059	0.551626	0.179934	3.06571	0.00217154	0.0381808	153	188	152	233	389	627	573	593	662	757	558
Ddx19b	1196.45	0.371456	0.121209	3.06458	0.00217975	0.0382807	796	1126	1040	1304	1964	2260	2446	2071	2609	2395	2570
Zfp280d	619.266	-0.45333	0.147968	-3.06371	0.00218611	0.0383479	484	697	739	511	674	1352	1368	1253	1234	1578	1336
Gm10769	205.138	-0.649155	0.211964	-3.06257	0.00219442	0.0384049	148	258	262	134	230	354	400	409	355	544	330
Dsp	814.067	-0.377853	0.123374	-3.06267	0.00219373	0.0384049	724	945	804	732	869	810	1060	622	761	755	722
Rcn2	158.495	-0.594067	0.194188	-3.05923	0.00221906	0.0387465	158	185	161	117	168	389	409	262	343	321	307
Acbd4	78.5075	0.804589	0.262998	3.0593	0.00221858	0.0387465	51	53	62	95	155	133	180	130	156	141	150
Mbnl1	143.849	-0.647159	0.21163	-3.05798	0.00222836	0.0388642	118	170	177	109	142	376	357	307	325	415	245
Rhbdf2	246.309	0.551462	0.180467	3.05575	0.00224495	0.0391086	185	184	200	264	460	461	558	324	528	409	492
Gm5850	217.353	0.539839	0.176688	3.05533	0.00224813	0.0391191	170	186	149	258	370	0	0	0	0	1	0
Lasp1	1311.1	0.338277	0.11073	3.05496	0.00225091	0.0391224	1022	1190	1048	1441	2084	3407	3056	3250	3540	3839	3322
Pik3c2b	266.917	0.505147	0.165376	3.05454	0.00225408	0.0391327	187	259	186	319	442	332	400	341	501	356	433
Gm37494	264.303	-0.53888	0.176499	-3.05316	0.00226445	0.0392678	219	287	327	202	286	547	602	587	623	667	665
Yipf5	171.251	-0.597517	0.19581	-3.05152	0.00227686	0.0393929	148	192	206	136	169	503	552	495	523	612	478
Ttf2	777.412	0.377868	0.123816	3.05185	0.00227437	0.0393929	615	682	609	860	1263	1551	1557	1325	1777	1561	1716
Tubb2a-ps2	296.264	0.4689	0.15373	3.05016	0.00228722	0.0395269	216	258	233	337	500	197	242	206	243	189	309
Kbtbd8	169.445	-0.761311	0.249671	-3.04926	0.00229407	0.039555	102	248	219	121	159	514	578	661	638	737	660
Lgals3bp	17.9559	1.61481	0.529539	3.04947	0.00229248	0.039555	9	8	10	25	47	71	79	49	64	45	52
Arid2	1505.39	-0.348087	0.114222	-3.04745	0.00230793	0.0397488	1239	1706	1605	1309	1712	2422	2258	1582	1817	1897	1873
Pcyt2	172.412	0.578858	0.190072	3.04547	0.00232315	0.0399655	114	141	142	196	313	332	363	291	423	388	383
Lmo4	55.2888	-0.945853	0.310674	-3.04451	0.00233056	0.0400036	53	68	68	32	52	121	139	114	133	154	118
Tceal8	208.667	-0.607255	0.199479	-3.04421	0.00233292	0.0400036	166	236	266	175	192	766	752	681	676	778	683
Aurkb	480.385	0.481725	0.158263	3.04382	0.00233592	0.0400036	391	411	335	505	873	1107	1160	928	1264	1117	1110
Gm12758	27.1732	1.38522	0.455081	3.04389	0.00233538	0.0400036	13	19	14	28	78	48	59	73	102	70	146
Wdr34	140.608	0.639512	0.210167	3.04288	0.00234327	0.0400841	97	116	104	153	274	332	346	285	395	374	386
Nbr1	1197.91	0.408515	0.13432	3.04136	0.00235509	0.0401956	833	1066	1023	1203	2155	2632	2967	2860	3360	3381	3151
Nat9	27.0923	1.30798	0.430062	3.04137	0.00235505	0.0401956	12	15	20	38	62	88	104	77	89	91	91
Eif3d	1521.77	0.351992	0.115776	3.04029	0.00236351	0.0402939	1233	1386	1143	1744	2347	4329	4607	3942	4857	4792	4589
1810026B05Rik	153.694	-0.708877	0.23323	-3.03939	0.00237057	0.040369	121	160	221	106	156	408	489	420	386	521	387
Fam114a2	354.172	0.523804	0.172416	3.03802	0.00238135	0.0405069	225	345	267	362	676	821	901	931	1175	1064	1136
Ptpn9	88.3321	-0.768983	0.253155	-3.0376	0.00238469	0.0405184	83	122	88	64	81	104	151	117	99	122	83
Hmmr	1422.79	0.38721	0.127525	3.03633	0.00239476	0.0406438	990	1256	1247	1459	2484	3329	3608	3478	4535	3818	4316
Taf1d	1133.54	-0.490662	0.161661	-3.03513	0.00240435	0.0407154	871	1175	1490	953	1166	2272	1975	1763	1621	2135	1501
Srsf10	1164.7	-0.408863	0.134706	-3.03521	0.00240365	0.0407154	905	1319	1353	947	1339	2389	2457	2266	2511	2740	2435
Ube3a	1406.35	-0.471843	0.155494	-3.03448	0.00240952	0.0407574	1028	1569	1789	1124	1552	3446	3810	3257	3675	3884	3737
Flt1	66.3039	-0.894457	0.294865	-3.03345	0.00241778	0.040806	64	100	62	42	61	129	136	41	53	56	65
Bsdc1	210.983	0.542666	0.178884	3.03362	0.00241641	0.040806	166	161	161	250	360	407	477	373	484	442	445
Zfp334	149.447	-0.623616	0.205628	-3.03273	0.00242349	0.0408361	147	171	159	127	133	330	321	200	260	284	241
2310057M21Rik	178.78	-0.582929	0.192224	-3.03255	0.00242494	0.0408361	179	184	202	129	195	336	375	260	332	366	296
Wnt3	18.216	-1.69732	0.560222	-3.02973	0.00244775	0.0411673	18	31	21	9	9	27	36	11	7	11	14
Fads1	445.814	0.460113	0.151897	3.02911	0.00245276	0.0411673	343	392	331	465	804	903	865	676	1048	739	895
Psme2b	220.423	0.577664	0.190689	3.02935	0.00245081	0.0411673	177	159	167	240	413	447	484	263	348	325	360
Gpx4	525.717	0.437455	0.144459	3.02823	0.0024599	0.0412415	433	442	386	582	889	549	568	362	569	508	621
Etf1	3094.75	-0.356366	0.117802	-3.02514	0.00248518	0.0415883	2481	3422	3469	2706	3471	7801	7809	7684	8479	9195	7776
Gm9294	660.82	0.395581	0.130769	3.02503	0.00248608	0.0415883	501	636	481	752	1060	520	524	451	678	559	687
Gmfb	536.447	-0.482624	0.159628	-3.02343	0.00249925	0.0416023	401	637	642	408	614	1708	1874	1631	1959	1972	1737
Eif3j1	500.971	-0.467504	0.154635	-3.02326	0.00250064	0.0416023	382	591	589	400	556	397	425	383	428	528	388
Cdc5l	575.452	0.40312	0.133304	3.02407	0.00249401	0.0416023	412	477	512	662	918	1249	1431	1699	1643	1957	1510
Fbf1	224.44	0.509273	0.168441	3.02345	0.00249906	0.0416023	166	195	167	266	375	495	485	368	543	456	488
Gm8112	90.7729	0.774425	0.256068	3.02429	0.00249216	0.0416023	74	67	52	115	169	0	0	0	0	0	0
0610010F05Rik	148.97	-0.611995	0.20251	-3.02205	0.0025107	0.0417239	128	192	159	113	152	271	305	234	303	240	275
Ubald2	376.539	0.453356	0.150287	3.0166	0.00255626	0.0424345	301	322	277	424	634	488	548	584	710	594	590
Sorbs1	314.757	0.463165	0.153559	3.0162	0.00255968	0.0424448	224	282	248	347	544	462	475	533	516	552	491
Epb41l4a	460.731	-0.487603	0.161688	-3.01569	0.00256393	0.0424687	419	567	450	433	416	525	647	567	622	692	540
Dnm1l	1078.76	-0.367297	0.121814	-3.01524	0.00256778	0.0424862	895	1215	1165	866	1301	2447	2645	2362	2838	2808	2698
Ndc1	680.072	-0.406082	0.134796	-3.01256	0.00259054	0.0427693	585	747	748	516	832	1647	1655	1625	1626	1938	1645
Plcg2	788.74	0.391988	0.13011	3.01274	0.00258904	0.0427693	596	638	689	863	1307	2179	1797	1180	1779	1533	1917
Nelfe	273.652	0.479736	0.159325	3.01105	0.00260344	0.0429354	209	222	217	327	444	555	582	497	582	580	647
Gm43362	78.9052	-0.797838	0.265059	-3.01004	0.00261209	0.0430314	68	99	96	55	73	116	135	113	98	122	93
Gm6652	43.8462	1.02614	0.341215	3.00731	0.00263572	0.0433734	31	31	23	58	91	33	49	64	89	60	100
Anxa3	78.0185	-0.808744	0.269031	-3.00614	0.00264585	0.0434116	82	104	74	49	78	77	151	41	42	47	39
Gm7265	119.799	-0.72277	0.240421	-3.00627	0.00264474	0.0434116	87	167	143	83	120	291	286	266	227	292	206
Cmklr1	86.6624	0.740731	0.246413	3.00605	0.00264663	0.0434116	54	77	58	112	156	184	213	224	328	280	291
Jph4	46.1371	-1.01891	0.339113	-3.00464	0.00265892	0.0435661	49	60	50	32	34	98	79	25	64	25	49
Zfhx4	23.0731	-1.49125	0.496459	-3.00377	0.00266654	0.0436177	18	38	31	11	15	21	27	10	4	8	5
Cpe	45.5238	-1.06351	0.354075	-3.00363	0.00266783	0.0436177	55	64	39	29	35	105	65	30	34	30	38
Kdm5b	5118.88	0.291723	0.0971868	3.00167	0.00268501	0.0438512	3896	4908	4144	5575	7935	9199	10252	10293	11759	12101	11046
Gtf2ird1	480.933	0.395827	0.131912	3.0007	0.00269362	0.0439446	347	431	398	565	748	723	789	624	806	720	727
Dennd1b	387.784	-0.457448	0.152512	-2.99942	0.00270498	0.0440824	322	440	439	335	401	710	905	700	755	828	601
Zfp422	81.7335	-0.780553	0.260286	-2.99882	0.00271024	0.0441004	84	88	97	55	79	106	114	104	116	131	117
Xpo4	1347.6	-0.373559	0.124576	-2.99864	0.0027119	0.0441004	1070	1526	1506	1144	1534	3448	3304	2987	3535	3524	3215
Mpdz	245.762	-0.505004	0.168632	-2.99471	0.00274703	0.0446239	210	285	275	188	274	406	385	181	258	188	225
Tmpo	1654.98	-0.368627	0.123275	-2.99028	0.00278726	0.0452189	1307	1881	1845	1438	1848	3754	4017	3434	3970	4248	3852
Gstp2	197.664	0.578612	0.193536	2.98969	0.00279262	0.0452189	145	188	123	224	360	150	216	243	250	342	273
Gm29719	27.2975	1.3055	0.436652	2.98979	0.00279166	0.0452189	13	12	22	43	56	8	9	10	10	13	10
Fam3c	654.546	-0.403949	0.135132	-2.9893	0.00279621	0.0452288	554	759	690	595	673	1342	1255	925	1201	1085	1124
Gm7292	158.172	-0.586746	0.19633	-2.98857	0.00280284	0.045246	140	184	180	116	170	6	12	13	11	12	17
Plekhg5	333.221	0.448593	0.150112	2.98839	0.00280447	0.045246	250	272	276	386	545	552	493	405	540	469	497
Rnf19b	239.116	0.501702	0.167894	2.9882	0.00280623	0.045246	163	201	201	271	414	468	549	525	558	654	571
Gm6035	630.574	0.382744	0.128119	2.98742	0.00281344	0.045314	467	584	499	683	1048	84	91	76	119	73	82
Man2a1	371.427	-0.468178	0.15682	-2.98545	0.00283159	0.0455097	292	458	409	299	409	530	543	454	540	493	516
Kat7	1592.17	0.328468	0.110017	2.98563	0.00282998	0.0455097	1167	1495	1322	1694	2589	3642	3765	3268	3965	3945	3768
B930086L07Rik	552.402	-0.402446	0.134903	-2.98322	0.00285229	0.0457938	500	572	609	465	617	959	891	684	627	781	605
Tubg2	48.9266	1.022	0.34283	2.98108	0.00287238	0.0460675	22	44	31	55	115	86	101	73	93	91	91
Impdh2-ps	1993.61	0.335791	0.112683	2.97997	0.00288281	0.0461859	1621	1753	1574	2166	3197	3183	3673	2966	3731	3317	3735
Eid1	67.5036	-0.879672	0.295327	-2.97864	0.0028953	0.04622	61	78	88	53	50	188	222	228	214	265	164
Nipa2	214.822	-0.528273	0.177385	-2.97812	0.00290019	0.04622	187	239	249	167	231	644	607	565	625	695	497
Ppp1r10	526.495	-0.478277	0.160569	-2.97864	0.00289529	0.04622	523	529	570	491	484	1286	1179	912	760	1131	653
Slc44a1	555.017	-0.40332	0.135416	-2.97839	0.00289768	0.04622	456	667	580	460	630	694	960	824	1016	893	927
Spag9	739.278	0.448748	0.150625	2.97923	0.00288972	0.04622	495	676	613	727	1385	1309	1880	1479	2004	1724	1842
Slc40a1	94.7684	-0.762323	0.256035	-2.97742	0.00290687	0.0462779	75	138	103	70	86	154	165	76	91	94	73
Rbfaos	103.518	-0.762597	0.256224	-2.97629	0.00291761	0.0464001	92	112	136	87	80	244	296	488	262	713	279
Eef1g	3892.68	0.318859	0.107195	2.97457	0.002934	0.0466119	3130	3579	3020	4581	5694	5718	6151	4869	6115	5634	5945
Frmd5	87.3229	-0.808152	0.271727	-2.97413	0.00293818	0.0466294	88	116	86	75	62	92	113	44	57	63	61
Dock3	101.565	-0.733884	0.247052	-2.97056	0.00297259	0.0471262	104	105	121	83	84	178	145	87	92	107	118
Gm10566	188.543	0.539372	0.181625	2.96969	0.00298097	0.0472096	135	173	132	234	308	2	3	2	0	2	4
Ogdh	962.036	0.382201	0.128718	2.9693	0.00298478	0.0472206	722	833	804	990	1668	2690	2782	2349	3079	2713	2618
Cdk11b	758.996	0.361238	0.121681	2.96874	0.00299025	0.0472509	577	653	641	895	1145	1467	1477	1375	1518	1449	1460
Gm8129	928.159	0.419288	0.141248	2.96846	0.00299293	0.0472509	760	852	634	1000	1589	766	853	722	1018	861	968
Lonp1	925.43	0.339833	0.114542	2.96689	0.00300824	0.0474432	681	872	754	1030	1456	1519	1858	1496	2128	1817	2034
Cd44	21.0422	-1.52433	0.514261	-2.96411	0.00303556	0.0478243	22	35	22	11	12	29	33	12	23	9	18
Dcaf4	327.446	0.451765	0.152453	2.9633	0.00304357	0.0479007	258	276	249	376	541	528	750	593	866	706	810
Kars	2295.42	0.328005	0.110711	2.96272	0.00304938	0.0479423	1864	2059	1792	2499	3654	5739	5936	5023	6513	6242	6341
Txnl4a	211.464	-0.542719	0.183338	-2.96022	0.00307423	0.0482829	219	245	199	180	204	562	545	399	490	507	484
Plcg1	929.667	0.353263	0.11936	2.95966	0.00307979	0.0483202	740	846	713	1052	1453	1520	1566	1170	1615	1480	1608
Spag7	251.29	0.487881	0.164875	2.9591	0.00308536	0.0483575	194	201	198	301	409	657	811	648	741	781	712
Psip1	1227.11	-0.339874	0.114933	-2.95716	0.00310492	0.0486138	1034	1350	1311	1076	1394	3423	3580	3033	3747	3455	3679
Eif5	2245.95	-0.383244	0.129639	-2.95624	0.00311414	0.0487078	1752	2462	2634	1903	2538	6227	5949	5950	6338	6643	5784
Topors	824.514	-0.375556	0.127052	-2.95592	0.00311736	0.0487079	727	854	914	719	911	1772	1708	1674	1668	2182	1591
Hps1	128.733	0.611279	0.206824	2.95554	0.00312117	0.0487173	88	112	93	162	218	267	297	224	302	255	294
Slc6a15	118.849	-0.770439	0.260883	-2.95319	0.00314505	0.0489891	95	126	171	99	92	245	268	226	217	276	235
Gpc4	343.271	-0.500562	0.169481	-2.9535	0.00314196	0.0489891	337	410	322	317	313	341	473	357	341	423	349
Gm43481	140.193	-0.616447	0.20883	-2.9519	0.00315826	0.0490766	124	167	158	116	130	167	152	108	116	144	126
Mbtps2	324.122	-0.506942	0.171746	-2.95169	0.00316038	0.0490766	243	398	380	262	343	754	804	589	760	635	672
Kif3a	204.156	0.564255	0.191139	2.95206	0.00315664	0.0490766	142	165	165	211	395	434	513	439	565	443	509
Lzts1	33.3523	-1.18759	0.402488	-2.95061	0.00317143	0.0491977	29	44	46	20	24	84	85	64	63	74	53
Myo15b	43.4658	1.06052	0.359581	2.94933	0.00318465	0.0493523	19	41	25	52	100	89	109	98	111	79	161
Arap2	207.792	-0.521728	0.176936	-2.94868	0.00319136	0.0494058	196	224	230	158	229	234	302	204	212	263	235
Gm10231	252.241	0.49586	0.168201	2.94802	0.00319817	0.0494607	188	236	173	311	402	1	1	0	0	1	0
C530008M17Rik	124.581	-0.666056	0.225985	-2.94735	0.0032051	0.0495173	133	131	135	104	108	110	113	49	61	45	67
Clybl	92.1518	0.731657	0.248365	2.9459	0.00322017	0.0496994	66	82	53	115	170	145	212	134	225	166	233
Vbp1	366.737	-0.511406	0.173719	-2.94388	0.00324128	0.0499237	265	465	429	293	391	1549	1725	1520	1899	1713	1891
Pdzk1	42.1061	1.04895	0.356312	2.9439	0.00324106	0.0499237	24	39	19	58	86	96	125	79	162	97	169
Mybl2	2901.11	0.305281	0.103717	2.9434	0.0032463	0.0499501	2324	2655	2303	3303	4348	3548	3946	4184	4556	4758	4484
Smim10l1	35.8624	-1.14592	0.389609	-2.9412	0.00326945	0.0499811	32	44	51	19	30	92	88	105	95	110	63
Ctdspl	63.0721	-0.915118	0.311033	-2.94219	0.003259	0.0499811	46	95	76	44	52	71	87	49	67	25	58
Casd1	66.1387	-0.847935	0.288203	-2.94214	0.00325948	0.0499811	64	79	78	51	52	139	123	128	138	191	164
Ptp4a1	360.846	-0.480533	0.163298	-2.94268	0.00325384	0.0499811	305	377	439	276	411	136	152	145	140	146	157
Rtn3	873.268	-0.385038	0.130912	-2.9412	0.00326944	0.0499811	719	1070	880	786	925	1774	1845	1570	1743	1810	1657
Npc1	701.964	0.409815	0.139345	2.94101	0.00327139	0.0499811	500	684	532	727	1234	1345	1361	1327	1574	1505	1449
Xylt2	214.416	0.522077	0.177469	2.9418	0.00326315	0.0499811	150	179	174	234	388	520	489	433	526	573	537

## Sheet: all_genes
Gene_Identifier	baseMean	log2FoldChange	lfcSE	stat	pvalue	padj	rmce_input_aligned.bam	wt20_input_aligned.bam	wt44_input_aligned.bam	dko4_input_aligned.bam	dko13_input_aligned.bam	Reg
Xkr4	10.5036	-2.13996	0.764026	-2.8009	0.00509611	NA	12	17	13	4	4	No Change
Gm37180	4.51712	-5.57051	1.68848	-3.29913	0.000969844	NA	5	9	7	0	0	No Change
Gm37363	3.1044	-1.7815	1.35557	-1.31421	0.188775	NA	2	3	7	1	2	No Change
Gm37329	2.82522	-1.38941	1.45023	-0.958063	0.338031	NA	5	4	1	3	0	No Change
Gm7341	2.45856	0.407339	1.3662	0.298155	0.765585	NA	1	1	4	2	5	No Change
Gm38148	12.1414	-2.19938	0.71681	-3.06828	0.00215292	NA	13	20	16	4	5	No Change
Gm19938	15.2943	-1.8959	0.645995	-2.93485	0.00333708	NA	21	24	14	9	4	No Change
Gm37381	9.45206	0.116492	0.783919	0.148602	0.881867	NA	5	3	17	7	17	No Change
Gm6101	4.13247	0.075643	1.03237	0.0732713	0.94159	NA	4	3	4	4	6	No Change
Gm7357	119.86	0.483051	0.214527	2.25171	0.0243408	0.170871	79	114	93	146	192	No Change
Gm37323	2.26337	-2.96854	1.96465	-1.51097	0.130796	NA	2	8	0	1	0	No Change
Gm6085	391.3	0.357113	0.141806	2.51833	0.0117914	0.110629	297	337	332	458	593	No Change
Gm6119	18.0928	-0.413702	0.510574	-0.810268	0.417786	0.73541	19	20	16	16	19	No Change
Gm2053	5.25935	-0.106258	0.969075	-0.109649	0.912688	NA	4	8	3	8	3	No Change
Gm6123	159.439	0.189338	0.192722	0.982442	0.325882	0.667877	129	139	146	173	229	No Change
Mrpl15	658.902	0.0653171	0.136424	0.47878	0.632095	0.863359	544	647	590	594	1016	No Change
Gm37144	30.4246	-0.067518	0.405824	-0.166373	0.867864	0.960028	23	25	37	30	39	No Change
Lypla1	284.804	-0.450471	0.452197	-0.996183	0.319161	0.661204	160	304	424	231	316	No Change
Tcea1	479.048	-0.311185	0.152052	-2.04656	0.0407011	0.227207	366	519	551	414	567	No Change
Gm6104	44.3122	-0.427556	0.348968	-1.2252	0.220499	0.553568	42	57	37	44	40	No Change
Gm37277	2.78963	-1.57611	1.49734	-1.05261	0.292521	NA	7	3	0	1	2	No Change
Rgs20	12.8453	-0.461776	0.614466	-0.751508	0.452347	NA	14	10	15	12	12	No Change
Gm37079	2.6006	-0.543555	1.43207	-0.379559	0.704273	NA	5	3	0	1	4	No Change
Atp6v1h	278.237	0.0698238	0.155247	0.44976	0.652883	0.871953	228	276	247	282	389	No Change
Gm37567	1.97571	1.03016	1.53519	0.67103	0.502202	NA	0	2	2	2	5	No Change
Oprk1	3.56263	-0.771434	1.14618	-0.673048	0.500917	NA	3	6	3	2	4	No Change
Rb1cc1	424.813	-0.240969	0.149869	-1.60786	0.107865	0.385295	322	479	453	369	532	No Change
4732440D04Rik	18.0697	-0.436413	0.518186	-0.842194	0.399679	0.722771	18	15	22	14	21	No Change
Gm2147	2.89235	0.964809	1.26376	0.763445	0.445198	NA	1	4	1	3	7	No Change
Gm19026	86.5962	0.103641	0.243847	0.425025	0.670818	0.879567	66	88	78	92	119	No Change
Gm37108	178.462	0.277675	0.182035	1.52539	0.127162	0.419657	139	160	153	200	266	No Change
Pcmtd1	447.727	-0.0895812	0.162287	-0.551994	0.580952	0.834945	316	468	487	388	635	No Change
Gm38372	214.522	-0.0282772	0.187457	-0.150847	0.880096	0.96317	143	233	224	214	282	No Change
Gm9826	275.992	0.193221	0.189883	1.01758	0.308879	0.653603	272	251	189	286	415	No Change
Gm26901	6.78117	-0.104959	0.866377	-0.121147	0.903574	NA	4	3	12	7	8	No Change
Gm16284	2.92431	-0.803127	1.3073	-0.614343	0.538989	NA	3	6	1	1	4	No Change
Gm15452	86.2311	0.0221572	0.250824	0.0883379	0.929608	0.979454	81	84	70	81	124	No Change
Gm36964	6.44197	0.283258	0.862752	0.328319	0.74267	NA	7	6	3	10	6	No Change
Gm24276	126.272	-0.453603	0.229251	-1.97863	0.0478579	0.248572	99	150	144	86	161	No Change
Gm6152	2.62453	-1.49842	1.4036	-1.06756	0.28572	NA	2	5	3	1	2	No Change
Gm7493	11.4299	0.000963097	0.634609	0.00151762	0.998789	NA	7	15	10	11	16	No Change
Gm6187	5.10572	0.341412	0.939284	0.363481	0.716246	NA	3	7	3	5	9	No Change
Gm7512	3.81124	-0.210197	1.08494	-0.193742	0.846378	NA	3	3	5	4	4	No Change
Rrs1	317.62	-0.146795	0.156566	-0.93759	0.348455	0.685775	278	321	308	324	366	No Change
Adhfe1	9.93952	0.0470302	0.671965	0.069989	0.944202	NA	8	9	10	9	15	No Change
Gm6161	312.987	0.094462	0.152254	0.620424	0.534979	0.808627	255	325	260	329	431	No Change
Mybl1	197.559	0.00855646	0.18049	0.0474068	0.962189	0.988473	145	204	196	192	274	No Change
Vcpip1	463.273	-0.24433	0.143372	-1.70417	0.0883492	0.348431	361	512	493	424	550	No Change
1700034P13Rik	2.21156	0.604775	1.43528	0.421365	0.673489	NA	2	1	2	1	6	No Change
Sgk3	86.2809	0.110263	0.262746	0.419657	0.674736	0.881654	58	77	96	81	133	No Change
Gm6195	42.9392	-0.367219	0.343271	-1.06976	0.284726	0.628552	38	44	48	31	56	No Change
Mcmdc2	27.8269	0.334256	0.411461	0.812365	0.416582	0.734581	17	28	25	30	45	No Change
Snhg6	261.534	-0.165997	0.166022	-0.999848	0.317384	0.660415	223	266	264	220	357	No Change
Snord87	10.6038	-1.8406	0.753261	-2.4435	0.0145455	NA	7	18	17	3	7	No Change
Tcf24	15.5404	-0.316459	0.565437	-0.559671	0.575704	NA	14	11	21	12	20	No Change
Cops5	460.903	-0.071488	0.137115	-0.521373	0.602107	0.846446	408	483	402	434	616	No Change
Cspp1	568.385	0.147379	0.131571	1.12015	0.26265	0.605312	426	546	531	572	850	No Change
Arfgef1	726.426	-0.226656	0.14801	-1.53136	0.125681	0.417005	527	801	810	615	942	No Change
Gm37569	12.7343	-1.00813	0.664414	-1.51732	0.129185	NA	9	11	24	6	13	No Change
Gm15604	2.08437	-0.088743	1.57484	-0.0563503	0.955063	NA	0	1	5	1	4	No Change
Gm28659	2.16475	-0.0416815	1.40962	-0.0295693	0.976411	NA	2	2	2	2	3	No Change
Prex2	185.205	-0.520486	0.186429	-2.79187	0.00524037	0.0682915	184	217	178	156	185	No Change
A830018L16Rik	39.8931	-0.913187	0.376471	-2.42565	0.0152811	0.127603	42	45	47	34	25	No Change
Gm38178	18.3373	-0.124955	0.509557	-0.245223	0.806284	0.939487	15	15	22	16	25	No Change
Gm7560	6.94031	0.333633	0.858421	0.388659	0.697528	NA	5	5	7	13	4	No Change
Gm2383	28.473	0.197386	0.414823	0.475832	0.634194	0.864411	25	26	23	24	50	No Change
Sulf1	545.774	-0.812397	0.162149	-5.01019	5.43754e-07	8.73087e-05	530	639	643	446	410	Down
Slco5a1	59.6833	-0.360441	0.29434	-1.22457	0.220737	0.553889	60	68	52	48	72	No Change
Gm29283	5.22237	0.224396	0.964941	0.232549	0.816112	NA	1	7	6	4	10	No Change
Prdm14	166.69	0.379621	0.192747	1.96954	0.0488916	0.252041	124	162	125	177	281	No Change
Ncoa2	580.659	0.0610479	0.128682	0.47441	0.635207	0.864834	476	544	548	593	800	No Change
Gm38376	13.0972	0.332882	0.602798	0.552229	0.580792	NA	14	8	10	14	21	No Change
Gm37409	23.9572	-0.143529	0.456575	-0.31436	0.753247	0.917407	27	25	16	21	32	No Change
Gm38223	3.88249	0.172818	1.07869	0.16021	0.872716	NA	4	2	4	3	7	No Change
Gm37702	14.2256	-0.6589	0.615888	-1.06984	0.284692	NA	6	20	21	10	15	No Change
Gm38120	82.2644	0.0124106	0.257234	0.0482464	0.96152	0.988053	72	72	80	90	101	No Change
Gm38380	41.8167	-0.146595	0.357113	-0.4105	0.681439	0.885298	40	35	44	31	63	No Change
Tram1	527.375	-0.438938	0.152632	-2.87578	0.00403026	0.0578982	401	621	612	420	602	No Change
Lactb2	398.424	0.0601475	0.140266	0.428809	0.668062	0.878063	309	397	374	410	545	No Change
Gm38319	51.3746	0.363755	0.327772	1.10978	0.267094	0.609943	31	60	38	50	92	No Change
Gm5523	25.819	0.461351	0.42975	1.07353	0.283032	0.626918	18	22	22	25	49	No Change
Eya1	58.0011	-0.816045	0.343977	-2.37238	0.0176737	0.141129	58	59	74	55	34	No Change
Gm9947	8.51794	0.845346	0.749603	1.12772	0.259436	NA	6	9	3	9	19	No Change
Msc	63.9915	0.315148	0.295324	1.06713	0.285914	0.629934	49	61	50	88	77	No Change
Gm37412	4.31692	-1.07012	1.05996	-1.00959	0.312691	NA	4	5	6	3	3	No Change
Smt3h2-ps4	115.019	0.102712	0.223398	0.459771	0.645681	0.870173	103	114	90	111	172	No Change
Rpl5-ps1	1350.23	0.27203	0.109283	2.48924	0.0128018	0.116182	1031	1320	1087	1494	2031	No Change
Trpa1	11.9766	-0.576026	0.63482	-0.907386	0.364203	NA	10	15	13	12	9	No Change
Gm10566	188.543	0.539372	0.181625	2.96969	0.00298097	0.0472096	135	173	132	234	308	Up
Terf1	513.566	0.289372	0.132489	2.18411	0.0289539	0.186913	399	477	421	601	739	No Change
Gm37509	62.0427	0.15378	0.288999	0.532112	0.594648	0.842185	46	54	63	71	82	No Change
4930444P10Rik	2.46932	-1.48303	1.52344	-0.973473	0.330318	NA	5	3	1	0	3	No Change
Rpl7	1654.71	0.221051	0.108591	2.03563	0.0417877	0.230455	1350	1549	1364	1852	2363	No Change
Rdh10	57.4782	-0.541384	0.299054	-1.81032	0.0702457	0.307257	56	60	64	47	58	No Change
Stau2	143.655	-0.146276	0.208876	-0.7003	0.48374	0.778738	121	137	153	120	200	No Change
Ube2w	92.7189	-0.258736	0.256317	-1.00944	0.312765	0.65764	62	118	97	78	118	No Change
Gm38342	2.53641	-2.1909	1.57857	-1.3879	0.165168	NA	4	2	4	0	2	No Change
Eloc	205.51	-0.523323	0.179011	-2.92341	0.00346223	0.0523689	184	224	236	162	219	No Change
Tmem70	118.6	-0.0213131	0.213721	-0.0997242	0.920563	0.97543	100	117	111	117	158	No Change
Gm5828	55.7961	0.580766	0.295536	1.96513	0.0493997	0.253579	39	45	44	69	94	No Change
Jph1	185.751	-0.337562	0.183173	-1.84285	0.0653502	0.295127	178	199	179	167	206	No Change
Gdap1	2.35217	-3.02793	1.83488	-1.6502	0.0989014	NA	3	5	2	1	0	No Change
Gm5251	17.4441	0.107855	0.539491	0.19992	0.841543	0.951468	8	17	22	21	21	No Change
Rbm6-ps1	133.26	-0.172755	0.213368	-0.809659	0.418136	0.735586	120	120	142	121	169	No Change
Gm16070	6.43572	-2.48249	1.05413	-2.35502	0.0185215	NA	3	11	13	2	2	No Change
Crispld1	21.0269	-0.503848	0.491477	-1.02517	0.305282	0.650373	15	33	19	15	25	No Change
Gm7690	2.93118	0.876441	1.26004	0.695565	0.486701	NA	3	2	1	2	8	No Change
Gm17969	12.1716	-0.0365629	0.645497	-0.056643	0.95483	NA	6	12	16	16	11	No Change
Gm28756	2.84966	-1.39138	1.53011	-0.909332	0.363175	NA	6	4	0	3	0	No Change
Gm17837	78.3428	-0.00540166	0.262811	-0.0205534	0.983602	0.994096	54	81	82	82	100	No Change
Gm10075	63.8075	-0.0431849	0.303303	-0.142382	0.886778	0.965879	65	64	47	74	69	No Change
Gm4849	321.57	-0.176861	0.151264	-1.16922	0.242314	0.580958	284	341	302	313	380	No Change
Pkhd1	35.7645	-0.573761	0.376886	-1.52237	0.127915	0.42095	28	45	41	31	33	No Change
Gm15795	4.05668	0.965681	1.05398	0.916222	0.35955	NA	3	3	2	7	6	No Change
Il17f	7.01315	0.584333	0.867916	0.673261	0.500782	NA	3	2	11	7	14	No Change
Mcm3	1911.18	0.115258	0.110274	1.04519	0.295936	0.641018	1621	1893	1570	2050	2619	No Change
Paqr8	51.3167	-0.112626	0.331136	-0.340119	0.733767	0.908131	45	64	37	58	54	No Change
Efhc1	8.95625	0.821539	0.711141	1.15524	0.247992	NA	5	7	7	10	19	No Change
Tram2	165.784	-0.0457553	0.189788	-0.241087	0.809488	0.941204	141	181	141	161	220	No Change
Tmem14a	8.02203	0.341911	0.752518	0.454356	0.649572	NA	6	9	5	11	10	No Change
Gm38224	2.37751	0.820577	1.38293	0.59336	0.55294	NA	1	2	2	5	2	No Change
Gsta3	9.28071	-0.279027	0.760675	-0.366815	0.713757	NA	14	9	4	5	15	No Change
Gm28836	3.29961	-0.24736	1.18027	-0.20958	0.833996	NA	1	5	4	3	4	No Change
Kcnq5	4.43815	-0.213537	1.02367	-0.208599	0.834761	NA	3	6	4	6	3	No Change
Gm7658	523.278	0.0980063	0.136651	0.717203	0.473249	0.772812	398	500	505	511	774	No Change
Gm38243	2.59236	-2.10265	1.53054	-1.37379	0.169506	NA	5	3	2	1	1	No Change
Rims1	135.642	0.0263953	0.202543	0.130319	0.896314	0.968543	110	140	121	140	180	No Change
Gm27028	2.5031	-0.0840951	1.34491	-0.0625284	0.950142	NA	3	2	2	1	5	No Change
Ogfrl1	99.5554	-0.0801622	0.239836	-0.334238	0.7382	0.910135	73	119	91	88	140	No Change
Smap1	235.167	-0.0294563	0.172676	-0.170587	0.864549	0.95867	178	231	245	224	322	No Change
Sdhaf4	20.4976	0.580501	0.497416	1.16703	0.243196	0.581667	18	17	12	18	44	No Change
Fam135a	316.614	-0.365732	0.156898	-2.33102	0.0197521	0.151347	255	378	330	273	358	No Change
Tubb4b-ps2	79.3384	-0.132019	0.270333	-0.488357	0.625297	0.860372	69	99	60	67	111	No Change
Gm28439	1847.67	-1.08991	0.407367	-2.67551	0.00746165	0.0847107	1255	2318	2954	1213	1324	No Change
Gm10222	571.87	-0.870481	0.310141	-2.80673	0.00500476	0.0663623	428	673	835	404	482	No Change
Gm28438	1043.37	-1.07813	0.371792	-2.89982	0.0037338	0.0551188	700	1435	1557	632	830	No Change
Gm28437	8292.29	-0.378319	0.143206	-2.64178	0.0082471	0.0895366	6079	9700	9582	6233	10485	No Change
Gm10925	8433.02	-0.497779	0.290668	-1.71253	0.0867984	0.345552	5716	9812	11016	6417	9518	No Change
Gm28661	9246.56	-0.164371	0.103045	-1.59515	0.110679	0.390469	8019	9463	9089	7960	12437	No Change
Gm29216	6919.17	-0.0757451	0.109888	-0.689296	0.490637	0.784089	5449	6872	7144	6357	9439	No Change
Lmbrd1	100.241	-0.232829	0.230066	-1.01201	0.311534	0.656421	90	105	98	91	121	No Change
Adgrb3	19.4578	-0.142562	0.496229	-0.28729	0.77389	0.92559	18	16	21	21	21	No Change
Gm15702	5.13244	0.836352	0.94264	0.887244	0.374947	NA	2	5	4	5	12	No Change
Gm38286	2.51178	0.840807	1.38962	0.605063	0.545137	NA	3	0	2	3	5	No Change
Gm38260	4.80484	-0.237919	1.02608	-0.231871	0.816638	NA	6	4	4	1	10	No Change
Gm37628	6.45932	0.232565	0.840235	0.276785	0.781945	NA	4	9	4	6	11	No Change
8030445P17Rik	4.57397	-1.54286	1.09085	-1.41436	0.157257	NA	4	4	9	2	3	No Change
Gm38198	11.2027	-0.54251	0.663342	-0.817844	0.413447	NA	9	10	16	11	9	No Change
Gm37077	7.74074	-0.444937	0.768452	-0.579004	0.562586	NA	6	9	9	6	9	No Change
Gm37895	11.3592	-0.942519	0.677834	-1.39049	0.164381	NA	7	13	19	8	9	No Change
Gm36952	10.7635	-0.0152915	0.647677	-0.0236098	0.981164	NA	8	13	9	11	14	No Change
Gm37602	8.27059	-0.338844	0.780287	-0.434255	0.664103	NA	4	9	12	10	6	No Change
2900022M07Rik	3.39277	-1.00854	1.20611	-0.83619	0.403048	NA	3	7	2	2	3	No Change
Gm19028	49.4613	-0.538668	0.34573	-1.55806	0.11922	0.405654	31	70	57	44	46	No Change
Gm7846	37.2609	-0.301377	0.383156	-0.786565	0.431536	0.746617	30	53	29	39	36	No Change
Gm5697	32.2152	0.271182	0.40104	0.676196	0.498916	0.787805	19	25	38	36	48	No Change
Gm5525	646.283	0.250196	0.135319	1.84892	0.0644686	0.292804	510	667	481	716	955	No Change
Gm6473	53.3194	0.00299357	0.303745	0.00985553	0.992137	0.997291	47	51	48	56	68	No Change
Phf3	2488.84	0.053538	0.0998127	0.536385	0.591693	0.840726	2045	2424	2274	2507	3456	No Change
Gm37522	73.3175	-0.363949	0.270146	-1.34723	0.177906	0.501552	58	84	81	57	91	No Change
Gm37906	129.468	-0.372498	0.238715	-1.56043	0.118659	0.405139	85	148	163	106	153	No Change
Ptp4a1	360.846	-0.480533	0.163298	-2.94268	0.00325384	0.0499811	305	377	439	276	411	Down
Gm6489	2.92021	0.310982	1.31843	0.235874	0.813531	NA	4	0	3	2	6	No Change
Gm19680	78.6734	0.403038	0.261529	1.54108	0.123297	0.413322	62	78	52	94	121	No Change
Khdrbs2	4.28243	-1.1162	1.10346	-1.01155	0.311756	NA	3	3	9	2	4	No Change
Gm37110	2.59283	1.04711	1.31085	0.798798	0.424408	NA	2	2	1	3	6	No Change
Gm37911	7.2291	-0.000331615	0.827239	-0.00040087	0.99968	NA	3	5	12	7	10	No Change
Gm37792	5.3874	-0.259288	0.951607	-0.272474	0.785257	NA	2	5	9	6	5	No Change
Gm7114	60.1709	-0.0960606	0.293143	-0.327692	0.743144	0.911918	54	68	48	62	72	No Change
Gm7933	18.8517	-0.27017	0.499293	-0.541106	0.588435	0.838755	16	24	16	18	21	No Change
Prim2	198.607	-0.0439796	0.184102	-0.238887	0.811193	0.94131	187	193	171	180	280	No Change
Gm29228	2.07457	1.03798	1.45794	0.711951	0.476495	NA	1	1	2	3	4	No Change
Gm37618	45.1024	-0.0828338	0.330734	-0.250455	0.802236	0.937228	43	42	41	46	55	No Change
Rab23	239.697	-0.182349	0.169148	-1.07804	0.281016	0.625139	205	237	250	210	312	No Change
Bag2	33.4551	-0.64268	0.395827	-1.62364	0.104453	0.379172	29	51	29	24	35	No Change
Zfp451	985.64	-0.290838	0.12563	-2.31504	0.0206106	0.155101	785	1078	1075	849	1191	No Change
Gm15455	94.4504	0.0342516	0.237241	0.144375	0.885204	0.965488	78	87	92	92	133	No Change
Bend6	13.0207	-1.76539	0.717903	-2.45909	0.013929	NA	16	28	7	3	10	No Change
Gm37067	2.32799	-1.92952	1.58615	-1.21648	0.223803	NA	4	4	1	1	1	No Change
Dst	7341.14	-0.240384	0.0976901	-2.46068	0.0138675	0.12163	6490	8053	7000	6888	8502	No Change
Gm37354	40.7215	-0.390721	0.395593	-0.987685	0.323307	0.665585	37	30	56	24	59	No Change
Gm38157	47.115	-0.194051	0.34216	-0.567133	0.570624	0.827887	28	63	48	43	59	No Change
Gm26788	6.17095	0.285567	0.868921	0.328646	0.742423	NA	2	8	6	8	8	No Change
Gm37233	15.7153	0.499495	0.537766	0.928832	0.352976	NA	11	13	13	21	23	No Change
Ccdc115	63.1488	-0.328418	0.299785	-1.09551	0.273293	0.61719	59	76	54	66	59	No Change
Imp4	662.112	-0.224013	0.124721	-1.79612	0.0724757	0.312251	562	728	647	624	776	No Change
Ptpn18	16.8865	0.523165	0.525969	0.994669	0.319897	0.661532	15	11	13	21	27	No Change
Cfc1	2.25059	-2.0112	1.62396	-1.23845	0.215549	NA	3	4	2	0	2	No Change
Arhgef4	51.9669	-0.24613	0.316671	-0.77724	0.437017	0.750785	49	48	55	40	71	No Change
Gm38336	13.6382	-0.336653	0.582139	-0.578303	0.56306	NA	13	15	13	10	18	No Change
Fam168b	555.791	-0.202662	0.130111	-1.55761	0.119326	0.405799	504	567	539	521	667	No Change
Plekhb2	104.405	0.226607	0.228648	0.991072	0.32165	0.663716	80	103	87	103	168	No Change
Gm37670	21.2159	0.0387491	0.491366	0.0788599	0.937144	0.981862	12	21	25	27	22	No Change
Gm33222	3.46674	0.648831	1.15867	0.559978	0.575495	NA	1	5	2	6	4	No Change
Hs6st1	710.629	0.0933708	0.121995	0.765369	0.444052	0.755836	576	716	614	760	960	No Change
Uggt1	1055.75	0.185868	0.116006	1.60222	0.109106	0.387847	766	1029	968	1138	1525	No Change
Arid5a	26.6344	-0.0602994	0.441463	-0.13659	0.891355	0.967306	20	22	32	32	27	No Change
Kansl3	440.362	0.171161	0.135062	1.26728	0.205057	0.535481	347	432	376	466	640	No Change
Lman2l	132	0.219707	0.20668	1.06303	0.287768	0.632548	101	120	120	135	205	No Change
Cnnm4	98.453	0.144089	0.246173	0.585318	0.558334	0.820752	89	87	83	87	162	No Change
Gm37909	6.60976	0.81721	0.846097	0.965858	0.334115	NA	4	7	3	12	8	No Change
Cnnm3	272.259	-0.137882	0.157478	-0.875566	0.381266	0.710147	237	292	249	259	341	No Change
Ankrd23	3.46538	-0.135278	1.13374	-0.11932	0.905022	NA	3	4	3	2	6	No Change
Ankrd39	28.523	-0.167863	0.41094	-0.408486	0.682917	0.885624	28	30	24	23	40	No Change
Sema4c	68.6348	-0.294494	0.29056	-1.01354	0.310803	0.655516	77	72	53	64	76	No Change
Fam178b	60.7707	0.268611	0.295816	0.908033	0.363861	0.696122	56	51	46	74	82	No Change
Gm6428	8.09971	1.13478	0.784459	1.44657	0.148017	NA	7	6	2	9	20	No Change
Cox5b	96.3389	0.042399	0.248123	0.170879	0.864319	0.958556	96	93	71	101	127	No Change
Actr1b	478.915	-0.122424	0.137361	-0.891263	0.372788	0.702996	441	476	440	464	596	No Change
Zap70	24.5276	1.21	0.452596	2.67347	0.00750709	0.0849086	10	21	14	32	57	No Change
Tmem131	1672.35	-0.118846	0.111999	-1.06113	0.288629	0.633295	1351	1689	1717	1610	2103	No Change
Gm37506	6.15957	-0.794585	0.908961	-0.874168	0.382027	NA	10	7	3	4	6	No Change
Gm38115	83.9316	-0.366242	0.250568	-1.46165	0.143837	0.44826	73	90	91	69	99	No Change
F830112A20Rik	132.911	-0.0295305	0.210301	-0.14042	0.888328	0.966078	95	143	133	133	174	No Change
Rpl12-ps1	84.7423	0.150558	0.268061	0.561658	0.574349	0.829886	85	62	73	90	120	No Change
Vwa3b	27.0564	0.636872	0.428452	1.48645	0.137161	0.436892	19	20	22	26	57	No Change
Cnga3	8.8136	1.45041	0.802384	1.80763	0.0706648	NA	2	11	2	10	25	No Change
Inpp4a	130.002	0.093937	0.212546	0.44196	0.658518	0.874457	98	147	106	130	188	No Change
Coa5	357.103	-0.189656	0.158796	-1.19434	0.232344	0.567099	299	337	395	339	428	No Change
Unc50	90.4294	-0.14539	0.249072	-0.583727	0.559404	0.821234	65	96	99	89	109	No Change
Mgat4a	169.049	-0.014177	0.189567	-0.0747863	0.940385	0.98259	146	179	142	175	216	No Change
4930594C11Rik	11.8497	-0.95917	0.682335	-1.40572	0.159808	NA	6	24	12	7	11	No Change
2010300C02Rik	12.644	-0.192266	0.618311	-0.310953	0.755836	NA	12	17	8	9	19	No Change
Tsga10	22.5266	-0.163462	0.47513	-0.344036	0.730819	0.906853	15	29	22	15	36	No Change
Lipt1	38.5378	0.00108099	0.360802	0.00299609	0.997609	0.999324	34	31	40	42	47	No Change
Mitd1	67.1955	0.0074389	0.277905	0.0267677	0.978645	0.993151	51	75	60	60	100	No Change
Mrpl30	177.703	0.192117	0.200282	0.959236	0.33744	0.676277	167	165	128	181	271	No Change
Txndc9	305.747	0.0273	0.172055	0.158671	0.873928	0.961477	207	305	328	296	432	No Change
Eif5b	1495.06	0.0415436	0.107441	0.386664	0.699005	0.89268	1172	1487	1414	1522	2035	No Change
Rev1	986.964	-0.0934415	0.112687	-0.829215	0.406983	0.727869	835	1037	917	925	1302	No Change
Gm37062	51.6128	-0.33094	0.328832	-1.00641	0.314218	0.658392	50	46	58	35	72	No Change
Aff3	173.448	-0.27812	0.1932	-1.43954	0.149997	0.457607	172	174	165	141	222	No Change
Lonrf2	2.26199	-1.10807	1.46996	-0.75381	0.450963	NA	2	4	2	2	1	No Change
Chst10	59.8504	-0.19002	0.292524	-0.649587	0.515959	0.798075	52	72	50	56	73	No Change
Pdcl3	235.794	0.190537	0.169708	1.12273	0.261552	0.603912	175	229	211	274	316	No Change
Gm37309	15.1247	-0.0556677	0.567014	-0.098177	0.921792	NA	10	18	15	10	26	No Change
Npas2	2.92156	1.27177	1.26282	1.00709	0.313893	NA	2	1	2	6	4	No Change
Rpl31	301.32	-0.104649	0.152501	-0.686218	0.492576	0.785426	257	323	274	293	380	No Change
Tbc1d8	98.3174	0.169336	0.249319	0.679197	0.497013	0.787366	86	98	74	86	166	No Change
Cnot11	301.293	-0.266061	0.153573	-1.73248	0.0831889	0.33786	267	328	294	280	345	No Change
Gm15832	16.1965	-0.486912	0.540525	-0.900814	0.367687	NA	16	17	17	15	15	No Change
Snord89	4.62239	-0.135866	0.991751	-0.136996	0.891034	NA	4	3	6	5	5	No Change
Rnf149	213.498	-0.345904	0.172557	-2.00458	0.0450083	0.240921	201	236	205	178	253	No Change
Gm23722	9.50163	-0.363553	0.832029	-0.436947	0.66215	NA	6	7	16	1	20	No Change
D930019O06Rik	2.09169	0.463606	1.45368	0.318918	0.749789	NA	1	1	3	2	4	No Change
Map4k4	2212.87	-0.060561	0.113203	-0.534978	0.592665	0.841097	1921	2246	2016	2329	2657	No Change
Il1r2	2.21682	1.82179	1.56923	1.16094	0.245666	NA	1	0	2	1	9	No Change
Il1r1	8.80121	1.48485	0.761571	1.94972	0.0512091	NA	3	4	7	19	13	No Change
Gm38070	2.63346	0.00152247	1.31815	0.00115501	0.999078	NA	4	2	1	3	3	No Change
Il1rl2	5.9214	0.300994	0.902947	0.333347	0.738873	NA	2	5	8	9	6	No Change
Mfsd9	8.762	1.58341	0.793953	1.99433	0.0461156	NA	1	9	4	10	26	No Change
Mrps9	224.671	0.116146	0.174212	0.666696	0.504966	0.791877	190	217	191	212	346	No Change
Tgfbrap1	108.752	-0.282409	0.237312	-1.19004	0.234033	0.568976	98	134	91	108	114	No Change
AI597479	165.55	0.0333192	0.190216	0.175165	0.86095	0.957932	127	168	158	157	239	No Change
Fhl2	26.7134	-0.427287	0.430161	-0.99332	0.320554	0.662438	21	38	24	22	30	No Change
Gm8210	111.159	0.259556	0.222735	1.16531	0.243893	0.582703	92	94	96	127	160	No Change
Nck2	122.172	-0.0659768	0.221216	-0.298246	0.765515	0.92348	95	117	130	129	146	No Change
Gm37536	20.4509	-0.423757	0.478976	-0.884716	0.37631	0.705851	18	25	20	16	24	No Change
Gm38228	30.9488	-0.289087	0.397246	-0.727728	0.46678	0.769513	24	31	37	27	37	No Change
Gm29155	4.70959	-0.665424	1.01484	-0.655692	0.512022	NA	4	3	8	4	4	No Change
Gm29156	4.68354	-1.23251	1.06305	-1.15941	0.24629	NA	2	6	9	3	3	No Change
Uxs1	147.723	-0.308771	0.19715	-1.56618	0.117307	0.402607	136	157	147	126	177	No Change
Gm16103	20.0386	0.448309	0.477228	0.939402	0.347525	0.685372	15	16	17	23	33	No Change
Gm19587	80.2811	-0.0317926	0.26766	-0.11878	0.90545	0.97154	65	99	61	71	117	No Change
Tpp2	891.101	-0.257325	0.118838	-2.16534	0.0303615	0.192265	767	963	898	750	1131	No Change
Gm8251	10.5134	-0.369165	0.717738	-0.514346	0.60701	NA	10	5	16	12	8	No Change
Tex30	61.308	-0.0973582	0.29135	-0.334162	0.738257	0.910135	48	57	68	61	76	No Change
Poglut2	133.824	-0.44655	0.215742	-2.06984	0.0384676	0.218918	126	151	136	92	170	No Change
Bivm	128.932	-0.242393	0.214623	-1.12939	0.258732	0.600144	100	148	133	106	169	No Change
Ercc5	431.282	0.10037	0.146915	0.683182	0.494492	0.786503	367	374	407	428	629	No Change
Gm15833	3.1823	-0.839585	1.29042	-0.650629	0.515286	NA	7	1	2	2	3	No Change
Gm5700	2.58433	-1.08227	1.6114	-0.671631	0.501818	NA	1	0	8	0	4	No Change
Txn-ps1	130.735	-0.260219	0.212227	-1.22613	0.220148	0.553102	128	133	122	124	147	No Change
Gulp1	21.9574	-2.03437	0.537841	-3.78247	0.000155277	0.00575712	22	42	24	8	10	Down
Gm37626	21.02	-0.500342	0.487439	-1.02647	0.30467	0.64954	19	18	28	18	21	No Change
Gm16102	2.88319	-0.500069	1.28805	-0.388237	0.697841	NA	2	4	3	4	1	No Change
Col3a1	2.28482	-2.98952	1.88542	-1.5856	0.112831	NA	2	7	1	1	0	No Change
Col5a2	44.7188	-1.23584	0.363494	-3.3999	0.000674108	0.016532	61	55	42	27	30	Down
Gm38211	5.66867	-2.19416	1.08168	-2.02846	0.0425128	NA	8	4	10	3	1	No Change
Gm7063	3.00332	0.0115549	1.29898	0.0088954	0.992903	NA	5	3	0	3	4	No Change
Wdr75	699.88	-0.231382	0.125194	-1.84819	0.0645747	0.29311	610	724	713	599	894	No Change
Gm5526	156.364	0.0207998	0.202691	0.102619	0.918266	0.974883	148	137	139	165	201	No Change
Gm5269	14.9	0.0228721	0.554009	0.0412847	0.967069	NA	10	16	15	16	19	No Change
Slc40a1	94.7684	-0.762323	0.256035	-2.97742	0.00290687	0.0462779	75	138	103	70	86	Down
Gm9496	3.58271	-0.126945	1.15693	-0.109726	0.912627	NA	3	1	6	3	5	No Change
Dnah7b	12.059	-0.879941	0.65252	-1.34853	0.177489	NA	15	14	11	11	7	No Change
Gm8326	152.243	0.0910953	0.198483	0.458959	0.646264	0.870492	135	134	137	155	215	No Change
Dnah7c	6.45722	-0.688018	0.853243	-0.806356	0.420038	NA	5	7	9	5	6	No Change
Slc39a10	773.967	-0.30251	0.125959	-2.40166	0.016321	0.134508	653	843	812	717	859	No Change
Gm28151	13.1903	-0.403858	0.613134	-0.658677	0.510103	NA	9	17	15	7	20	No Change
Gm4852	62.9754	0.282345	0.291063	0.970046	0.332024	0.671578	56	53	49	79	83	No Change
Gm8337	440.735	0.143642	0.141224	1.01713	0.309093	0.653633	367	391	402	449	649	No Change
Tmeff2	2.58664	-1.43773	1.51429	-0.949442	0.342396	NA	5	0	4	1	2	No Change
Nabp1	225.362	0.08834	0.181267	0.487346	0.626013	0.860719	153	228	228	218	334	No Change
Myo1b	764.331	0.147763	0.121838	1.21278	0.225212	0.559744	570	747	705	784	1124	No Change
Gm29453	10.6884	-0.230924	0.659736	-0.350025	0.72632	NA	12	10	9	8	15	No Change
Gm28323	16.0034	-0.245161	0.551658	-0.444407	0.656748	NA	10	24	14	14	20	No Change
Gm8420	98.6588	0.275875	0.230621	1.19623	0.231608	0.566694	76	88	86	112	145	No Change
Stat4	65.8264	0.350161	0.28958	1.2092	0.226585	0.561589	44	57	63	62	119	No Change
Gm3940	126.334	0.514088	0.247006	2.08128	0.0374083	0.215985	123	87	82	145	217	No Change
Stat1	35.1717	-0.236808	0.375902	-0.629973	0.528712	0.8047	35	33	34	36	37	No Change
Gls	515.445	-0.498487	0.145098	-3.43553	0.000591406	0.0150898	415	627	576	394	579	Down
Nab1	91.9758	-0.343406	0.266077	-1.29063	0.196832	0.527139	60	105	114	85	99	No Change
Gm5527	48.4956	-0.219071	0.322223	-0.679876	0.496583	0.78706	43	45	53	41	63	No Change
Nemp2	146.318	-0.040701	0.202584	-0.20091	0.840769	0.951231	114	152	143	129	212	No Change
Mfsd6	21.2765	0.100176	0.47451	0.211114	0.832798	0.949132	16	18	23	18	35	No Change
Inpp1	13.9565	0.274704	0.584757	0.469774	0.638517	NA	15	11	9	13	24	No Change
Hibch	73.7621	0.0773502	0.278344	0.277894	0.781093	0.929552	54	74	72	60	123	No Change
1700019D03Rik	189.039	-0.498852	0.214949	-2.3208	0.0202979	0.153566	166	177	243	172	176	No Change
1700019A02Rik	17.1582	0.439884	0.55401	0.793999	0.427196	0.743025	8	15	19	13	37	No Change
Pms1	196.483	-0.319933	0.178284	-1.79451	0.0727316	0.312715	166	227	197	165	237	No Change
Ormdl1	44.6732	-0.896904	0.350338	-2.56011	0.0104639	0.103384	35	67	51	30	39	No Change
Osgepl1	46.0984	-0.410598	0.329279	-1.24696	0.212411	0.54316	48	48	44	38	52	No Change
Asnsd1	59.8407	0.409575	0.297394	1.37721	0.168447	0.488514	40	61	46	59	109	No Change
Dnah7a	54.2125	-0.328007	0.325399	-1.00801	0.313448	0.658151	37	55	71	51	58	No Change
Stk17b	192.739	-0.0853147	0.183307	-0.465419	0.641632	0.868496	144	207	195	177	261	No Change
Hecw2	135.161	-0.691911	0.219059	-3.15856	0.0015855	0.0306504	120	169	151	114	113	Down
Gm37633	4.38128	-0.64307	1.08856	-0.590752	0.554686	NA	3	5	6	6	1	No Change
Ccdc150	14.4465	0.790214	0.58778	1.3444	0.178818	NA	11	15	5	17	29	No Change
Gtf3c3	320.173	-0.11288	0.153254	-0.736557	0.461392	0.765937	252	340	320	290	429	No Change
Pgap1	581.88	-0.57715	0.156792	-3.68098	0.000232335	0.00768837	460	666	729	422	638	Down
Gm36955	25.947	-0.485337	0.433661	-1.11916	0.263071	0.60569	20	29	32	21	28	No Change
Gm19637	16.817	-0.552378	0.532913	-1.03653	0.299957	0.644949	15	17	21	12	19	No Change
Ankrd44	23.7392	0.462163	0.483215	0.956432	0.338854	0.677725	22	13	21	19	50	No Change
Gm37370	2.1748	-0.728818	1.53752	-0.474022	0.635484	NA	3	1	3	0	4	No Change
A130048G24Rik	5.95614	0.223369	0.877081	0.254673	0.798976	NA	6	3	6	7	8	No Change
Sf3b1	2683.97	0.000936626	0.103453	0.00905368	0.992776	0.997515	2119	2838	2454	2569	3751	No Change
Coq10b	51.3567	-0.562056	0.33993	-1.65345	0.09824	0.368182	37	59	68	31	65	No Change
Gm17971	7.48324	0.490859	0.778238	0.630732	0.528216	NA	4	9	5	10	11	No Change
Hspd1	2518.02	-0.250871	0.118148	-2.12336	0.0337239	0.203877	2031	2711	2682	2417	2816	No Change
Hspe1	590.405	-0.343773	0.13672	-2.51443	0.0119225	0.111262	468	707	613	508	682	No Change
Gm5147	6.1977	-0.0672989	0.863316	-0.0779539	0.937865	NA	8	5	4	6	8	No Change
Gm16581	120.897	-0.00962112	0.237176	-0.0405653	0.967642	0.990113	123	122	86	131	147	No Change
Mob4	192.937	-0.436626	0.189212	-2.3076	0.0210211	0.157254	149	239	210	159	214	No Change
Gm6822	3.34303	0.325012	1.19092	0.272907	0.784924	NA	5	1	2	3	6	No Change
Rftn2	5.14041	-0.915991	0.993799	-0.921706	0.356682	NA	4	11	3	3	5	No Change
Mars2	153.974	-0.323156	0.213458	-1.51391	0.130049	0.424606	137	137	184	136	176	No Change
Boll	10.6153	-0.706974	0.670066	-1.05508	0.291388	NA	8	15	12	8	10	No Change
Gm8292	352.027	0.2452	0.145988	1.67959	0.0930379	0.358482	285	332	284	386	523	No Change
Plcl1	3.75327	-0.777583	1.13357	-0.685958	0.49274	NA	6	3	3	3	3	No Change
Gm38056	6.9892	-0.671043	0.835378	-0.803281	0.421812	NA	10	5	7	5	7	No Change
Gm6644	75.188	0.123735	0.265533	0.465988	0.641224	0.868367	61	70	68	89	93	No Change
Gm28900	31.699	0.546073	0.447025	1.22157	0.22187	0.55509	32	31	10	43	47	No Change
Satb2	125.463	-0.474455	0.235161	-2.01757	0.0436356	0.236701	92	143	156	113	122	No Change
4930558J18Rik	23.6871	0.126886	0.456429	0.277996	0.781015	0.929552	14	28	22	20	40	No Change
1700066M21Rik	36.3974	-0.297575	0.366718	-0.811453	0.417105	0.73499	27	42	40	32	43	No Change
Tyw5	56.328	-0.581269	0.314012	-1.85111	0.0641541	0.291892	52	62	64	53	46	No Change
Maip1	66.8962	-0.627783	0.284897	-2.20355	0.0275562	0.182191	53	84	79	51	67	No Change
Spats2l	50.8764	-1.22681	0.339156	-3.61725	0.000297746	0.00928528	47	84	53	29	37	Down
Kctd18	88.9431	-0.0725473	0.241692	-0.300164	0.764052	0.923133	74	91	85	82	121	No Change
Sgo2a	939.889	0.124881	0.127055	0.982888	0.325663	0.667877	657	998	860	961	1363	No Change
Aox1	11.7442	-0.630567	0.651444	-0.967952	0.333068	NA	15	9	13	7	14	No Change
Aox3	9.6692	0.115156	0.7192	0.160117	0.872789	NA	10	4	11	12	11	No Change
Aox4	5.5363	0.210627	0.905734	0.232549	0.816112	NA	6	3	5	6	8	No Change
Gm37607	29.9968	0.214595	0.396716	0.540929	0.588557	0.838755	20	31	27	35	41	No Change
Bzw1	1743.31	-0.59475	0.134373	-4.4261	9.59517e-06	0.000761384	1396	2051	2133	1362	1751	Down
Clk1	604.472	0.0537188	0.139485	0.385122	0.700147	0.893067	492	582	565	542	928	No Change
Ppil3	125.467	0.15043	0.219784	0.684443	0.493695	0.786219	117	116	96	125	189	No Change
Nif3l1	185.768	0.124414	0.179467	0.693242	0.488158	0.782084	154	179	160	192	266	No Change
Orc2	812.149	-0.103847	0.132141	-0.785878	0.431939	0.746887	630	801	871	781	1036	No Change
Gm23966	6.48965	-0.385509	0.841326	-0.458215	0.646798	NA	4	8	8	5	8	No Change
Gm15834	16.3744	-1.01307	0.579118	-1.74934	0.0802325	NA	18	23	16	5	20	No Change
Fam126b	184.207	0.0553065	0.184396	0.299933	0.764228	0.923133	152	167	179	180	263	No Change
Ndufb3	102.145	0.231257	0.229056	1.00961	0.312683	0.65764	81	88	93	112	150	No Change
Cbx3-ps7	274.206	-0.0636303	0.166698	-0.381711	0.702676	0.893793	229	267	270	294	322	No Change
Flacc1	4.48268	-0.919476	1.03942	-0.884607	0.376368	NA	6	4	5	2	5	No Change
Cflar	100.495	-0.00293659	0.236003	-0.012443	0.990072	0.996119	71	103	104	104	130	No Change
Casp8	17.5129	0.590831	0.57892	1.02057	0.307457	0.652178	5	15	21	14	40	No Change
Gm37760	6.7942	-0.0769071	0.81829	-0.0939851	0.925121	NA	5	6	8	8	7	No Change
Trak2	311.089	0.0139894	0.158555	0.088231	0.929693	0.979454	247	287	318	302	433	No Change
Stradb	40.7681	0.0699708	0.348478	0.20079	0.840863	0.951265	31	46	34	36	64	No Change
Tmem237	73.4655	-0.293284	0.265972	-1.10269	0.270163	0.613863	71	81	66	62	90	No Change
G730003C15Rik	2.8476	-0.637236	1.27163	-0.501117	0.616289	NA	4	3	2	2	3	No Change
Mpp4	3.25533	0.426423	1.17095	0.364168	0.715733	NA	1	3	4	4	5	No Change
Als2	602.167	0.323574	0.126255	2.56286	0.0103813	0.103014	454	532	518	694	904	No Change
Fzd7	985.543	-0.0946159	0.140685	-0.672538	0.501242	0.789444	761	1052	980	1076	1096	No Change
Gm973	6.57985	1.08733	0.89973	1.20851	0.226851	NA	0	7	6	9	14	No Change
Sumo1	377.952	-0.328894	0.15435	-2.13084	0.0331025	0.20173	305	399	431	326	441	No Change
D430013B06Rik	59.4413	-0.430225	0.312692	-1.37587	0.16886	0.489001	44	59	80	46	70	No Change
Gm29596	2.41473	-0.196611	1.35211	-0.14541	0.884387	NA	2	3	2	3	2	No Change
Nop58	2599.17	-0.287697	0.120471	-2.3881	0.0169358	0.137185	2186	2589	2929	2323	3035	No Change
Snord70	9.8646	-0.330074	0.730719	-0.451712	0.651477	NA	5	9	16	5	16	No Change
Gm26293	8.76598	-1.68455	0.817594	-2.06037	0.0393633	NA	5	13	16	3	6	No Change
Gm26287	8.78038	-0.209282	0.845172	-0.247621	0.804428	NA	2	6	18	4	16	No Change
Snord11	4.56646	-0.974807	1.03338	-0.943323	0.345516	NA	4	8	4	2	5	No Change
Bmpr2	624.738	-0.557278	0.134562	-4.1414	3.45187e-05	0.00188868	562	679	731	477	665	Down
Gm38125	27.4771	-0.840968	0.467258	-1.79979	0.0718935	0.310964	33	43	16	21	22	No Change
Fam117b	328.349	0.246936	0.154301	1.60035	0.10952	0.388461	229	319	297	339	517	No Change
Gm37531	37.4671	0.0488031	0.359173	0.135876	0.891919	0.96755	31	42	29	40	49	No Change
Ica1l	3.84685	-1.68754	1.19151	-1.4163	0.156687	NA	3	7	5	1	3	No Change
Wdr12	422.454	-0.0819652	0.139401	-0.587982	0.556544	0.820139	358	413	416	409	545	No Change
Carf	89.9	0.00880355	0.243399	0.0361692	0.971147	0.990955	73	99	76	84	129	No Change
Gm15464	361.747	0.338476	0.148425	2.28045	0.0225809	0.163202	285	343	272	424	540	No Change
Nbeal1	829.52	-0.239356	0.154809	-1.54613	0.122072	0.411321	607	942	903	642	1145	No Change
Cyp20a1	111.616	0.0329749	0.243944	0.135174	0.892474	0.967629	67	115	125	117	147	No Change
6030460B20Rik	9.716	-1.58924	0.780259	-2.03681	0.041669	NA	11	15	11	1	10	No Change
Abi2	735.06	-0.0929968	0.131752	-0.705848	0.480283	0.777498	574	754	753	653	1018	No Change
Raph1	1068.47	-0.103081	0.116393	-0.885627	0.375818	0.705851	836	1154	1047	1006	1393	No Change
Gm11575	12.227	0.00379234	0.686418	0.00552483	0.995592	NA	2	19	14	12	17	No Change
Gm11578	3.03936	-2.26231	1.48466	-1.52379	0.127561	NA	5	5	2	2	0	No Change
Eif4a-ps4	5092.96	0.329672	0.103413	3.18793	0.00143294	0.0284128	3872	4677	4163	5363	8366	Up
Rpl18-ps1	536.812	0.301217	0.142952	2.10712	0.035107	0.208414	461	450	431	627	780	No Change
Rpl17-ps1	3.76287	0.333458	1.11852	0.298125	0.765608	NA	5	1	3	4	6	No Change
Pard3b	11.0867	-1.57534	0.709711	-2.2197	0.0264393	NA	17	13	11	4	8	No Change
Gm37205	3.17955	0.0456831	1.22054	0.0374285	0.970143	NA	2	6	1	2	6	No Change
Gm11599	44.7582	-0.165212	0.36067	-0.45807	0.646902	0.870818	51	49	28	36	63	No Change
Nrp2	865.123	0.202737	0.136813	1.48186	0.138379	0.438439	693	924	636	973	1212	No Change
Gm37121	29.9086	0.0103	0.427423	0.0240979	0.980775	0.993359	26	41	16	28	43	No Change
Ino80d	1096.33	-0.205361	0.120208	-1.70838	0.087565	0.347094	895	1126	1169	994	1358	No Change
Ino80dos	16.2922	-0.387282	0.537755	-0.720183	0.471412	NA	18	16	15	14	18	No Change
Gm20342	215.388	-0.34731	0.170874	-2.03256	0.0420973	0.231421	195	243	211	182	252	No Change
Ndufs1	623.274	-0.122203	0.127871	-0.955678	0.339235	0.677725	525	616	630	592	792	No Change
Eef1b2	4080.38	0.156814	0.108216	1.44909	0.147313	0.454121	3451	3938	3325	4541	5562	No Change
Gm27390	36.6181	0.00848856	0.361287	0.0234954	0.981255	0.993359	34	34	32	36	50	No Change
Gm26457	13.212	-0.81769	0.602892	-1.35628	0.17501	NA	13	17	14	10	11	No Change
Snora41	24.1962	-0.79007	0.457545	-1.72676	0.0842113	0.339624	28	30	22	14	26	No Change
Platr12	53.2633	0.00668518	0.317238	0.0210731	0.983187	0.994096	49	49	48	42	86	No Change
Zdbf2	2393.85	-0.419313	0.110597	-3.79137	0.000149816	0.00562034	2053	2756	2542	2102	2517	Down
Gm11605	157.34	-0.0773113	0.203264	-0.380349	0.703686	0.893873	146	168	127	166	186	No Change
Adam23	318.936	-0.645087	0.171911	-3.75244	0.000175118	0.00625965	311	397	318	277	269	Down
Fastkd2	271.122	-0.290182	0.168404	-1.72313	0.0848654	0.340811	228	269	307	240	319	No Change
Klf7	305.187	-0.292043	0.155182	-1.88194	0.0598443	0.282566	263	319	324	276	351	No Change
Gm13750	35.0684	-0.0223694	0.375361	-0.0595943	0.952479	0.984369	28	41	29	29	54	No Change
Creb1	529.089	-0.631129	0.148133	-4.26057	2.03909e-05	0.00127179	445	621	637	422	502	Down
Mettl21a	45.4867	0.155317	0.340186	0.456566	0.647983	0.87101	35	53	33	40	76	No Change
2810408I11Rik	15.0035	0.101472	0.60576	0.167511	0.866968	NA	14	11	15	7	32	No Change
Ccnyl1	140.46	-0.174444	0.200388	-0.870534	0.384009	0.712105	118	155	133	131	174	No Change
Fzd5	797.97	0.0410442	0.122487	0.335091	0.737557	0.910135	641	820	713	859	1024	No Change
Gm38058	4.3946	0.919295	1.08935	0.843891	0.39873	NA	4	5	0	4	11	No Change
Plekhm3	263.859	0.113771	0.159503	0.713285	0.475669	0.774487	209	249	245	268	381	No Change
Rpl10a-ps1	1790.37	0.283404	0.116358	2.43561	0.0148666	0.126339	1493	1657	1370	2045	2629	No Change
Gm8550	18.2502	0.214885	0.511294	0.420277	0.674283	0.881578	18	18	11	18	29	No Change
Gm7329	6.13125	0.990232	0.858175	1.15388	0.248549	NA	4	4	4	10	10	No Change
D630023F18Rik	26.2102	0.0966257	0.45303	0.213288	0.831102	0.949074	12	37	23	28	36	No Change
Idh1	359.125	0.085578	0.147069	0.581888	0.560642	0.822166	287	379	302	357	518	No Change
Pikfyve	865.597	-0.197016	0.121952	-1.61551	0.1062	0.382164	714	958	848	742	1137	No Change
Gm15659	15.9333	0.242105	0.56021	0.432168	0.665619	NA	8	12	21	18	23	No Change
Map2	85.1686	-0.0993241	0.247208	-0.401784	0.687843	0.886957	67	94	81	79	113	No Change
Unc80	12.4432	-1.70845	0.674149	-2.53424	0.0112693	NA	15	16	16	7	5	No Change
Rpe	538.742	-0.196131	0.156479	-1.25341	0.210058	0.540138	395	547	626	493	667	No Change
Kansl1l	52.8349	0.169318	0.308675	0.548531	0.583327	0.835941	36	53	50	62	69	No Change
Gm37570	20.2331	0.130124	0.493984	0.263418	0.792228	0.933514	11	20	23	25	24	No Change
Gm38387	14.2213	-0.199105	0.569809	-0.349424	0.726771	NA	13	14	14	15	15	No Change
Gm38162	20.4714	-1.93841	0.542627	-3.57227	0.000353903	0.0105682	23	26	31	6	12	Down
Gm15789	3.68133	-1.53547	1.19694	-1.28284	0.199549	NA	3	7	4	2	2	No Change
6820402A03Rik	33.0287	-0.324401	0.385962	-0.8405	0.400628	0.723428	26	43	31	26	42	No Change
Gm37285	15.6607	-0.100724	0.551477	-0.182643	0.855078	NA	13	15	16	19	15	No Change
Gm38218	8.87246	-0.503008	0.758058	-0.663548	0.50698	NA	12	5	10	5	12	No Change
Acadl	195.918	0.102687	0.178391	0.575629	0.564866	0.823817	164	182	176	213	262	No Change
Gm15793	312.68	0.232024	0.156074	1.48663	0.137113	0.436848	268	285	248	347	454	No Change
Rpl31-ps14	143.898	0.16719	0.224867	0.743507	0.457175	0.763723	127	160	91	158	201	No Change
Lancl1	144.549	0.186956	0.206527	0.905238	0.365339	0.697102	123	129	124	137	233	No Change
Erbb4	2.33437	-2.10395	1.69215	-1.24336	0.213737	NA	1	8	1	0	2	No Change
Ikzf2	36.7235	-0.43138	0.367014	-1.17538	0.239845	0.577364	36	35	41	30	41	No Change
Gm29112	3.75717	-0.301717	1.14638	-0.263192	0.792402	NA	6	4	1	2	6	No Change
Gm28112	7.77931	-0.39649	0.776298	-0.510744	0.60953	NA	5	11	8	8	7	No Change
Spag16	13.344	1.1154	0.60014	1.85857	0.0630883	NA	6	7	12	20	26	No Change
Bard1	706.291	0.14068	0.123134	1.1425	0.253246	0.593248	526	721	628	733	1022	No Change
Gm16236	17.9574	0.699923	0.522711	1.33902	0.180563	0.505565	7	16	17	26	28	No Change
Atic	916.498	-0.191799	0.118927	-1.61274	0.1068	0.383207	768	1040	856	868	1100	No Change
Fn1	9508.74	0.412225	0.109418	3.76743	0.000164935	0.00603806	7619	8510	6918	11014	15176	Up
Apol7d	13.0325	-0.168525	0.601878	-0.279999	0.779478	NA	9	18	11	14	14	No Change
Gm5829	38.877	0.742401	0.368946	2.01222	0.0441966	0.238124	35	24	24	49	71	No Change
Gm5256	94.2139	0.615483	0.240978	2.55411	0.010646	0.104196	63	87	65	108	174	No Change
Gm5528	11.6604	0.126024	0.627973	0.200684	0.840946	NA	8	12	11	15	13	No Change
Gm8885	63.3263	-0.0866299	0.295494	-0.29317	0.769392	0.924295	64	55	58	52	93	No Change
Mreg	832.666	0.294655	0.123414	2.38754	0.0169613	0.137248	598	742	763	907	1293	No Change
Gm25360	109.065	-0.089477	0.26626	-0.336051	0.736832	0.909662	59	128	125	116	127	No Change
Gm23472	130.59	0.228663	0.267409	0.855108	0.392492	0.718413	57	149	137	149	185	No Change
Gm24497	114.258	0.0364288	0.266798	0.13654	0.891394	0.967306	57	125	134	116	156	No Change
Gm25939	103.251	0.261189	0.49654	0.526017	0.598876	0.84365	42	103	123	107	164	No Change
Pecr	46.502	0.305855	0.336377	0.909262	0.363212	0.696072	43	36	37	44	81	No Change
Tmem169	3.27451	-0.435979	1.18464	-0.368026	0.712854	NA	3	4	3	4	2	No Change
Xrcc5	906.233	0.0800237	0.11788	0.678859	0.497227	0.787376	722	954	770	921	1275	No Change
Gm15843	20.6373	0.474342	0.503361	0.942348	0.346014	0.683999	23	14	11	27	30	No Change
Smarcal1	213.631	0.358364	0.180355	1.987	0.0469229	0.245649	166	212	151	258	314	No Change
Gm39662	3.6681	0.373223	1.10764	0.336953	0.736152	NA	2	2	5	4	6	No Change
Rpl37a	736.262	-0.0231064	0.155328	-0.148759	0.881744	0.963676	733	734	558	772	918	No Change
Igfbp2	1196.28	0.552822	0.144122	3.83579	0.00012516	0.00483908	880	1159	745	1382	2110	Up
Igfbp5	6.71682	-0.617849	0.846308	-0.730052	0.465359	NA	5	12	5	5	7	No Change
6030407O03Rik	2.5837	2.26142	1.49334	1.51434	0.12994	NA	0	3	0	4	8	No Change
Tns1	176.903	0.44887	0.205205	2.18742	0.0287118	0.185805	154	124	142	197	299	No Change
Arpc2	582.184	-0.0590075	0.130771	-0.451228	0.651826	0.87162	505	628	497	566	763	No Change
Aamp	546.51	0.269134	0.131844	2.0413	0.0412211	0.228854	439	476	470	617	803	No Change
Pnkd	193.182	0.292622	0.195571	1.49625	0.134589	0.432175	159	202	128	207	304	No Change
Tmbim1	278.11	-0.12325	0.159777	-0.771388	0.440477	0.753454	251	300	240	265	352	No Change
Gm29358	14.772	1.10471	0.568946	1.94168	0.0521752	NA	6	11	11	25	25	No Change
Gm37931	8.37726	-0.136888	0.783959	-0.174611	0.861385	NA	11	3	9	9	9	No Change
Catip	8.45627	-0.26854	0.740374	-0.362708	0.716823	NA	9	10	6	6	12	No Change
Slc11a1	28.1733	0.925489	0.427859	2.16307	0.0305357	0.192566	19	25	13	46	44	No Change
Ctdsp1	169.118	-0.428443	0.218176	-1.96375	0.0495589	0.253926	143	192	184	173	145	No Change
Vil1	14.9361	0.539315	0.554044	0.973415	0.330347	NA	10	13	12	15	29	No Change
Usp37	1129.59	-0.0107405	0.125997	-0.0852439	0.932067	0.98032	858	1109	1158	1054	1600	No Change
Gm37733	72.4238	-0.609382	0.31259	-1.94946	0.0512407	0.25956	47	85	101	66	60	No Change
Cnot9	766.912	-0.120055	0.124461	-0.9646	0.334745	0.674365	630	767	783	747	952	No Change
Plcd4	16.2366	0.123722	0.541417	0.228515	0.819246	NA	16	15	12	13	28	No Change
Zfp142	363.28	-0.0297433	0.145363	-0.204614	0.837874	0.949885	318	365	323	368	468	No Change
Gm25035	2.72839	-0.581209	1.36847	-0.424715	0.671044	NA	0	4	5	2	3	No Change
Bcs1l	81.6677	0.313499	0.274444	1.1423	0.253328	0.593329	80	69	54	82	137	No Change
Rnf25	97.3725	0.0905378	0.233919	0.387047	0.698721	0.892601	79	90	92	95	143	No Change
Stk36	53.9863	0.726852	0.307981	2.36006	0.0182722	0.143266	29	52	38	71	95	No Change
Ttll4	1470.61	-0.208133	0.112256	-1.85409	0.063727	0.291249	1296	1505	1469	1411	1713	No Change
Cyp27a1	11.1842	0.143678	0.647525	0.221888	0.824401	NA	12	9	8	14	13	No Change
Prkag3	4.66214	0.4808	0.970529	0.4954	0.620317	NA	4	4	3	6	7	No Change
Wnt6	5.18085	-0.491213	0.957969	-0.512765	0.608116	NA	7	6	3	3	7	No Change
Wnt10a	2.84894	2.3337	1.59315	1.46483	0.142967	NA	0	1	2	11	0	No Change
Cdk5r2	14.2896	0.0712101	0.586198	0.121478	0.903313	NA	17	12	9	12	23	No Change
Ihh	2.59098	-0.117771	1.45853	-0.0807459	0.935644	NA	4	2	1	5	0	No Change
Nhej1	25.3336	0.15878	0.498261	0.318668	0.749978	0.915338	18	40	10	32	30	No Change
Cnppd1	77.2857	0.0349686	0.259803	0.134597	0.892931	0.967698	68	71	71	72	113	No Change
Retreg2	105.373	0.0234205	0.227165	0.103099	0.917884	0.974883	79	105	105	103	147	No Change
Zfand2b	36.2277	0.660243	0.365502	1.8064	0.0708555	0.308837	23	27	31	42	68	No Change
Abcb6	3.57539	-0.0069569	1.14695	-0.00606559	0.99516	NA	1	4	5	5	3	No Change
Atg9a	51.6665	0.194769	0.313013	0.622241	0.533784	0.80811	41	42	51	51	81	No Change
Ankzf1	148.189	0.689099	0.199676	3.45108	0.000558342	0.0144901	95	134	100	196	252	Up
Glb1l	35.4581	-0.033116	0.372563	-0.088887	0.929172	0.97936	33	31	34	30	53	No Change
Stk16	165.431	-0.102293	0.204102	-0.501183	0.616242	0.854628	143	143	179	169	198	No Change
Tuba4a	487.226	-0.0784947	0.14622	-0.536827	0.591387	0.840726	443	537	390	479	621	No Change
Dnajb2	60.9152	0.615132	0.291533	2.11	0.0348588	0.207824	47	43	47	82	96	No Change
Ptprn	102.403	-0.175031	0.245435	-0.713146	0.475755	0.774487	95	109	90	113	104	No Change
Dnpep	260.304	0.464108	0.163883	2.83195	0.00462652	0.062944	199	236	187	299	434	No Change
Des	39.8473	0.769381	0.36754	2.09333	0.03632	0.212366	33	28	24	42	85	No Change
Speg	83.8279	-0.311223	0.262246	-1.18676	0.235322	0.571012	92	86	70	73	98	No Change
Gmppa	103.615	0.32688	0.242693	1.34688	0.178017	0.501586	94	94	69	126	147	No Change
Chpf	105.063	0.101109	0.227146	0.445126	0.656229	0.873714	85	107	89	117	137	No Change
Obsl1	152.53	0.198744	0.206312	0.96332	0.335387	0.675139	110	170	119	179	204	No Change
Tmem198	3.45602	0.450281	1.15974	0.388261	0.697823	NA	4	2	2	6	3	No Change
Inha	4.57266	0.0529055	1.02167	0.0517835	0.958701	NA	7	3	2	4	7	No Change
Stk11ip	235.612	0.0467615	0.164356	0.284513	0.776017	0.926383	193	232	215	236	327	No Change
Slc4a3	43.7039	0.121367	0.35055	0.34622	0.729178	0.906518	36	54	27	48	59	No Change
Gm5257	3.08665	1.0655	1.21638	0.875955	0.381055	NA	2	3	1	3	8	No Change
Epha4	324.098	0.109889	0.166171	0.661298	0.508421	0.793837	242	290	333	307	496	No Change
Mir6352	2.44624	-0.124823	1.39678	-0.0893645	0.928792	NA	2	4	1	4	1	No Change
Sgpp2	2.07048	0.947496	1.53719	0.616382	0.537643	NA	3	1	0	2	5	No Change
Farsb	561.094	-0.0285913	0.131346	-0.21768	0.827679	0.947346	468	609	483	564	730	No Change
4833412K13Rik	33.2731	-0.347867	0.381998	-0.910653	0.362478	0.695715	29	36	35	32	34	No Change
BC035947	2.47339	0.838522	1.49669	0.560251	0.575308	NA	1	0	4	6	1	No Change
5730419F03Rik	39.536	-0.15066	0.374356	-0.402451	0.687352	0.886957	24	42	48	44	41	No Change
Acsl3	441.263	-1.05181	0.147912	-7.11103	1.15179e-12	1.00951e-09	462	592	482	240	396	Down
Utp14b	945.531	0.365517	0.140735	2.59719	0.00939887	0.0967218	621	788	927	1079	1480	No Change
Gm6159	158.244	-0.242878	0.200661	-1.21039	0.226128	0.5611	143	155	164	157	172	No Change
Gm5830	50.2979	0.165195	0.310708	0.531674	0.594952	0.842365	42	50	40	53	73	No Change
Ap1s3	103.639	-1.22229	0.282839	-4.32151	1.54966e-05	0.00106141	79	122	171	57	78	Down
Gm37886	18.0253	-1.15403	0.551169	-2.0938	0.0362782	0.212366	13	22	29	12	12	No Change
Wdfy1	322.292	0.0130595	0.156871	0.0832496	0.933653	0.981035	259	338	290	289	480	No Change
Mrpl44	99.2736	0.279225	0.25045	1.1149	0.264895	0.607405	97	81	71	104	157	No Change
Serpine2	152.4	0.105658	0.194886	0.542151	0.587714	0.838659	125	139	142	159	213	No Change
Gm5529	123.003	0.159762	0.212983	0.750118	0.453184	0.761169	103	111	108	137	168	No Change
Gm28071	37.4252	0.156796	0.375675	0.417372	0.676407	0.882011	40	28	29	36	58	No Change
Gm37932	4.04591	-1.17703	1.15255	-1.02124	0.307142	NA	4	3	7	4	1	No Change
Cul3	1075.85	-0.467215	0.130809	-3.57173	0.000354631	0.0105682	877	1223	1243	912	1123	Down
Gm37902	23.879	-0.883207	0.476651	-1.85294	0.0638907	0.291485	15	37	30	17	20	No Change
Gm37262	20.8869	-0.772171	0.498032	-1.55045	0.121034	0.409555	16	22	31	16	18	No Change
Gm6189	6.80105	-1.36588	0.901218	-1.5156	0.129621	NA	10	4	10	4	4	No Change
Nyap2	3.24072	-1.65314	1.36303	-1.21284	0.225193	NA	5	5	2	3	0	No Change
Gm5530	23.2653	0.11982	0.468563	0.255719	0.798168	0.935773	22	28	12	25	32	No Change
Irs1	125.271	-0.292497	0.216528	-1.35085	0.176745	0.499952	106	135	131	122	133	No Change
Rhbdd1	79.2666	-0.027443	0.271408	-0.101114	0.91946	0.975192	54	103	66	78	106	No Change
Gm19552	11.0345	-0.162025	0.651115	-0.248842	0.803483	NA	9	12	11	7	18	No Change
Mff	304.014	-0.134443	0.157273	-0.854835	0.392643	0.718413	282	306	276	301	366	No Change
Gm28941	22.588	-0.121664	0.501359	-0.242669	0.808262	0.940501	14	15	35	22	28	No Change
Agfg1	943.611	-0.0693682	0.137048	-0.506159	0.612745	0.852953	663	1044	962	877	1281	No Change
A030005L19Rik	4.21352	0.225904	1.0198	0.221518	0.824689	NA	3	5	3	4	7	No Change
Gm7553	44.8207	0.0988875	0.332849	0.297094	0.766395	0.92348	42	41	36	50	58	No Change
Slc19a3	8.91904	-0.853987	0.775147	-1.10171	0.270588	NA	11	11	8	2	13	No Change
Sphkap	2.72449	-1.32943	1.55315	-0.855957	0.392021	NA	0	3	7	3	0	No Change
Gm6374	9.45213	0.523509	0.703906	0.74372	0.457046	NA	8	6	8	8	20	No Change
4933436I20Rik	2.53162	-0.0202547	1.31164	-0.0154423	0.987679	NA	2	2	3	2	4	No Change
Pid1	102.235	-1.10474	0.255062	-4.33126	1.48256e-05	0.00102601	94	137	130	47	98	Down
Gm37058	13.7811	-1.26014	0.619896	-2.03282	0.0420707	NA	15	16	18	10	7	No Change
Dner	8.18028	1.18521	0.844139	1.40405	0.160305	NA	6	9	0	15	13	No Change
Trip12	7101.12	0.123048	0.104144	1.18152	0.237397	0.574026	5178	7081	6688	7244	10299	No Change
Gm38374	101.426	-0.929482	0.246329	-3.77333	0.000161081	0.00594002	85	134	128	70	83	Down
Gm37738	206.822	-0.355897	0.185169	-1.92201	0.0546041	0.268259	175	207	241	181	232	No Change
Fbxo36	9.04963	-0.105536	0.727224	-0.145121	0.884615	NA	12	7	6	9	11	No Change
Slc16a14	10.0749	-0.253135	0.687624	-0.36813	0.712776	NA	13	8	8	9	12	No Change
Rpl19-ps1	461.872	0.588616	0.15607	3.77148	0.000162282	0.00596977	367	352	332	517	854	Up
Gm17017	2.68116	-2.14515	1.6128	-1.33007	0.183494	NA	6	0	4	1	1	No Change
A630001G21Rik	3.76075	-0.817358	1.21292	-0.673876	0.50039	NA	0	6	7	3	3	No Change
Cab39	549.768	-0.332835	0.138151	-2.40921	0.015987	0.132622	442	620	595	454	666	No Change
Itm2c	132.474	-0.0449895	0.217516	-0.206833	0.83614	0.949539	125	129	114	112	197	No Change
Gm18180	79.6472	-0.366922	0.281751	-1.30229	0.192817	0.522318	72	76	91	84	70	No Change
2810459M11Rik	3.48931	-0.744869	1.2447	-0.598434	0.549551	NA	0	6	6	2	4	No Change
Psmd1	1457.61	0.00851888	0.114475	0.0744168	0.940679	0.982689	1138	1427	1442	1398	2045	No Change
Gm22786	2.41428	2.06969	1.47482	1.40335	0.160514	NA	0	2	1	6	4	No Change
Gm37914	37.2938	-0.151833	0.376551	-0.403219	0.686787	0.886957	23	51	35	32	51	No Change
Armc9	55.32	0.531421	0.307688	1.72714	0.0841421	0.339572	32	46	52	61	100	No Change
B3gnt7	468.719	-0.0255681	0.13583	-0.188236	0.850692	0.955491	397	464	436	484	594	No Change
Ncl	18226	0.0432866	0.108127	0.400333	0.688912	0.887023	13983	17506	18116	19401	23691	No Change
Snora75	32.2226	-0.454927	0.421135	-1.08024	0.280035	0.624423	17	39	45	26	36	No Change
Mir3535	4.85592	-0.166771	1.03969	-0.160404	0.872563	NA	2	2	10	3	8	No Change
Snord82	19.8247	-0.226825	0.527822	-0.429738	0.667386	0.877695	23	21	13	25	15	No Change
C130036L24Rik	6.41001	-2.11286	1.00078	-2.11122	0.0347535	NA	12	9	4	2	3	No Change
Ptma	3533.33	-0.350053	0.135421	-2.58492	0.00974021	0.0989293	2577	4123	4034	3092	3983	No Change
Pde6d	122.464	0.0182161	0.22732	0.0801343	0.93613	0.981462	123	112	97	130	156	No Change
Cops7b	174.653	0.0079358	0.193354	0.0410428	0.967262	0.990113	158	154	164	186	220	No Change
Dis3l2	169.765	0.218831	0.192825	1.13487	0.256431	0.596449	120	185	137	180	256	No Change
Gm29055	13.0044	-0.341918	0.596269	-0.573429	0.566354	NA	11	13	15	12	14	No Change
Gm37485	15.9068	-0.0737938	0.536768	-0.137478	0.890653	NA	12	19	14	16	20	No Change
Gm38142	18.7688	-0.254851	0.502859	-0.506804	0.612293	0.852953	18	17	20	14	26	No Change
Gm38010	12.3735	-0.0390548	0.646102	-0.0604468	0.9518	NA	11	17	7	7	23	No Change
Gm37541	7.91723	-0.498008	0.815877	-0.610397	0.541599	NA	6	8	11	2	14	No Change
Gm38021	7.16519	-0.530278	0.822526	-0.644695	0.519125	NA	4	12	7	7	6	No Change
Gm6136	3321.56	0.269603	0.108787	2.47827	0.0132021	0.118005	2735	3132	2564	3737	4902	No Change
Gm37967	10.4305	0.130208	0.690357	0.188609	0.850399	NA	4	11	13	14	11	No Change
Gm37447	16.3474	0.107584	0.544246	0.197675	0.843299	NA	14	11	18	20	19	No Change
Ecel1	11.8974	-0.983945	0.672548	-1.46301	0.143464	NA	17	9	14	5	13	No Change
Eif4e2	687.629	-0.0366388	0.125473	-0.292005	0.770283	0.924852	590	671	646	706	868	No Change
Efhd1	14.561	-1.06501	0.590047	-1.80495	0.0710824	NA	13	18	20	7	14	No Change
Gigyf2	1035.02	0.162953	0.111349	1.46344	0.143346	0.44758	816	1012	893	1086	1507	No Change
Ngef	12.771	-0.273438	0.633852	-0.431391	0.666184	NA	18	11	8	9	18	No Change
Gm17181	11.6812	-0.363233	0.63387	-0.573041	0.566617	NA	13	13	9	11	12	No Change
Gm6153	13.0246	0.136395	0.597719	0.228192	0.819497	NA	14	11	9	14	18	No Change
Inpp5d	763.963	0.736973	0.149851	4.91805	8.7411e-07	0.000122667	500	667	500	846	1560	Up
Atg16l1	339.407	-0.0959418	0.148243	-0.647194	0.517506	0.798874	300	333	323	329	432	No Change
Gm25395	80.0775	0.109129	0.271369	0.402143	0.687579	0.886957	58	93	64	98	94	No Change
Scarna6	42.439	0.476994	0.362553	1.31565	0.188291	0.517168	35	36	29	65	50	No Change
Dgkd	705.809	0.172818	0.122529	1.41042	0.158415	0.471883	585	658	601	757	1013	No Change
4833421G17Rik	9.09298	-0.545622	0.717881	-0.760045	0.447228	NA	8	13	8	6	11	No Change
Gm38365	43.2794	-0.0970483	0.334807	-0.289863	0.771921	0.925235	33	47	43	39	59	No Change
Usp40	186.24	-0.148796	0.186157	-0.799305	0.424114	0.740111	151	193	191	158	256	No Change
Dnajb3	3.34668	0.478254	1.16163	0.41171	0.680552	NA	3	3	2	2	8	No Change
Hjurp	1679.92	0.518962	0.111442	4.65681	3.21151e-06	0.000324491	1147	1475	1328	1898	2954	Up
Gm28888	4.47672	-0.512748	1.02429	-0.500587	0.616662	NA	3	5	6	5	3	No Change
Arl4c	270.722	-0.830136	0.175528	-4.72937	2.25216e-06	0.000240379	284	370	252	177	257	Down
Platr5	6.73054	1.60639	0.878132	1.82933	0.0673501	NA	3	1	6	12	14	No Change
Gm18699	13.4561	0.0731295	0.624474	0.117106	0.906776	NA	12	8	16	8	26	No Change
Sh3bp4	651.895	0.0999231	0.135587	0.736969	0.461141	0.765909	586	631	520	693	890	No Change
Gm38312	15.9032	-0.213788	0.539991	-0.39591	0.692171	NA	15	14	17	14	20	No Change
Gm5259	9.20118	-0.194627	0.703586	-0.276621	0.782071	NA	6	11	10	8	12	No Change
Agap1	709.798	-0.0370026	0.127617	-0.289952	0.771853	0.925235	632	722	615	730	894	No Change
Gm37297	53.0118	0.194878	0.302282	0.644689	0.519129	0.799422	40	50	48	58	76	No Change
Gm28499	10.0459	0.266009	0.688016	0.386632	0.699029	NA	12	7	6	11	15	No Change
Gm26037	5.44977	0.715314	0.903767	0.791481	0.428664	NA	3	4	5	6	11	No Change
Gm37521	20.1052	-0.144216	0.498539	-0.289276	0.77237	0.925405	13	25	20	24	19	No Change
Gbx2	45.5468	-0.611044	0.378008	-1.61648	0.10599	0.382057	56	35	51	44	34	No Change
D130058E05Rik	10.7989	-1.33665	0.724202	-1.84569	0.0649371	NA	19	10	9	6	7	No Change
Iqca	6.5774	2.68133	0.99394	2.69768	0.00698246	NA	0	5	1	9	24	No Change
Ackr3	25.1288	0.0830301	0.432469	0.191991	0.847749	0.95461	19	26	23	22	40	No Change
Gm35048	2.18186	-0.624898	1.44315	-0.433008	0.665009	NA	2	2	3	1	3	No Change
Cops8	275.481	-0.116966	0.160516	-0.72869	0.466191	0.769368	229	312	245	251	366	No Change
Col6a3	2.08597	1.73567	1.55395	1.11695	0.264018	NA	0	1	2	5	3	No Change
Mlph	3.83933	-0.062879	1.07718	-0.0583736	0.953451	NA	2	5	4	3	6	No Change
Rab17	6.4084	0.492191	0.834314	0.589934	0.555235	NA	5	4	6	8	10	No Change
Lrrfip1	457.433	-0.0179743	0.144748	-0.124176	0.901176	0.9697	408	476	379	481	572	No Change
Rbm44	71.0489	2.00502	0.349229	5.74129	9.39564e-09	3.47318e-06	24	28	37	78	242	Up
Gm7776	25.7085	0.563727	0.430593	1.30919	0.19047	0.520393	19	17	23	30	45	No Change
Ube2f	143.45	-0.190304	0.208453	-0.912932	0.361278	0.6946	137	129	146	135	173	No Change
Gm7785	105.322	0.192592	0.225385	0.854501	0.392828	0.718446	82	108	85	112	155	No Change
Scly	68.5792	-0.431304	0.306368	-1.4078	0.159191	0.472935	63	102	48	53	81	No Change
Espnl	2.43575	-0.0463566	1.37563	-0.0336984	0.973118	NA	2	4	1	1	5	No Change
Erfe	48.5766	-0.0318673	0.323058	-0.0986426	0.921422	0.975489	43	46	45	55	55	No Change
Ilkap	264.182	0.00728262	0.163459	0.0445532	0.964463	0.989141	238	249	235	272	345	No Change
Hes6	61.1642	-0.277448	0.327863	-0.846232	0.397424	0.720618	69	57	52	70	52	No Change
Per2	11.2301	-0.546136	0.652473	-0.837024	0.402579	NA	11	11	13	11	9	No Change
Traf3ip1	193.399	0.0224776	0.183163	0.122719	0.90233	0.970323	148	185	196	204	250	No Change
Asb1	104.484	-0.408254	0.231866	-1.76073	0.0782839	0.326402	96	122	101	96	106	No Change
Hdac4	445.507	-0.119405	0.144061	-0.828846	0.407191	0.727869	340	513	422	432	557	No Change
Gm37036	31.5451	-0.552561	0.404825	-1.36494	0.172272	0.493381	31	37	31	31	25	No Change
Ndufa10	450.304	0.152051	0.140091	1.08538	0.277754	0.621441	382	437	366	457	670	No Change
Cops9	75.9738	-0.314515	0.273008	-1.15204	0.249307	0.589039	74	86	66	77	75	No Change
Gpc1	258.609	-0.261706	0.188061	-1.39161	0.164042	0.480522	253	301	207	261	270	No Change
Ankmy1	5.85249	0.89747	0.874223	1.02659	0.304613	NA	3	4	5	8	11	No Change
Dusp28	7.26794	-0.513813	0.801003	-0.641462	0.521223	NA	6	9	8	4	10	No Change
5033417F24Rik	2.83003	1.73026	1.33935	1.29186	0.196405	NA	2	2	0	6	5	No Change
Rnpepl1	111.514	-0.15173	0.248689	-0.610119	0.541783	0.812353	115	106	95	125	113	No Change
Capn10	99.5815	0.380992	0.234047	1.62784	0.103558	0.377564	67	92	86	125	143	No Change
Kif1a	458.251	-0.350013	0.152229	-2.29925	0.0214907	0.158884	466	504	404	421	490	No Change
Crocc2	2.67548	2.17749	1.41822	1.53537	0.124694	NA	2	1	0	4	8	No Change
Sned1	27.9332	-0.471914	0.417484	-1.13038	0.258318	0.59955	26	34	27	19	35	No Change
Mterf4	118.3	-0.00713297	0.227558	-0.0313458	0.974994	0.992481	102	97	125	116	160	No Change
Gm7867	80.3919	0.338453	0.26778	1.26392	0.206259	0.536152	74	72	53	84	133	No Change
Pask	400.165	0.173014	0.141429	1.22333	0.221206	0.554516	307	410	334	437	565	No Change
Ppp1r7	420.783	-0.209854	0.142088	-1.47692	0.139696	0.4407	345	438	443	384	516	No Change
Ano7	4.53749	0.229941	1.00662	0.228428	0.819313	NA	3	7	2	4	8	No Change
Hdlbp	2667.06	-0.120004	0.101035	-1.18774	0.234934	0.570346	2292	2693	2590	2463	3490	No Change
Gm17415	58.2379	0.305042	0.29765	1.02483	0.305442	0.650373	52	45	48	67	86	No Change
Septin2	1368.2	-0.208061	0.125911	-1.65245	0.0984422	0.368268	1036	1500	1466	1208	1735	No Change
Farp2	41.8621	-0.237151	0.343744	-0.689905	0.490254	0.784089	37	45	41	32	58	No Change
Gm37250	3.48617	-0.323564	1.17057	-0.276416	0.782228	NA	6	2	2	3	4	No Change
Stk25	369.597	0.185987	0.162323	1.14579	0.251883	0.592175	345	332	280	389	545	No Change
Bok	60.422	-0.4374	0.328776	-1.33039	0.18339	0.51018	69	61	53	65	47	No Change
Thap4	315.081	0.216151	0.150296	1.43817	0.150387	0.458392	256	293	264	346	457	No Change
Gm10550	2.93825	0.937976	1.23717	0.75816	0.448355	NA	2	3	1	3	7	No Change
Atg4b	256.617	0.0883325	0.164912	0.535634	0.592211	0.840726	184	271	238	263	361	No Change
Dtymk	499.519	-0.208031	0.134851	-1.54268	0.122909	0.412768	453	497	498	461	606	No Change
Ing5	489.793	0.00352033	0.136045	0.0258762	0.979356	0.993359	382	482	484	498	647	No Change
D2hgdh	81.7554	0.0902424	0.256951	0.351205	0.725435	0.90457	63	92	66	77	124	No Change
Gm18666	11.861	-0.313182	0.658549	-0.475563	0.634385	NA	16	12	7	7	18	No Change
Gm7889	7.76107	-0.0276388	0.796769	-0.0346886	0.972328	NA	8	3	10	7	11	No Change
Gm7895	294.366	0.197617	0.163946	1.20538	0.228057	0.563486	242	305	219	331	411	No Change
Fam174a	30.8259	-0.193336	0.423861	-0.456129	0.648297	0.87101	15	40	36	31	35	No Change
BC055308	5.89108	0.135529	0.888184	0.152591	0.878721	NA	4	9	3	5	10	No Change
Gm15427	3221.64	0.258404	0.118522	2.18021	0.0292419	0.187798	2720	3107	2378	3592	4757	No Change
St8sia4	4.69242	-2.99185	1.37174	-2.18106	0.0291789	NA	2	6	12	2	0	No Change
Gm1833	2.4515	0.962674	1.35107	0.712526	0.476139	NA	1	3	1	4	4	No Change
Slco4c1	65.3937	-0.56676	0.305755	-1.85364	0.0637904	0.291295	46	72	90	54	64	No Change
Panct2	31.3643	-0.21224	0.398422	-0.532702	0.59424	0.842025	22	38	32	33	33	No Change
Gm28901	4.59294	-0.54709	1.02435	-0.534085	0.593283	NA	6	3	5	5	3	No Change
Gm6430	547.748	0.150388	0.131633	1.14248	0.253254	0.593248	430	551	465	611	742	No Change
D1Ertd622e	99.6147	0.0124073	0.235782	0.0526219	0.958033	0.98708	72	100	102	105	128	No Change
Ppip5k2	835.317	-0.307859	0.123779	-2.48716	0.0128766	0.116582	695	898	902	737	971	No Change
Gin1	45.5988	-0.0692775	0.347942	-0.199106	0.84218	0.951833	26	59	45	48	55	No Change
Pam	105.154	-0.468373	0.228759	-2.04745	0.0406143	0.226806	104	117	104	81	120	No Change
Gm37140	2.50446	0.375718	1.40403	0.267599	0.789008	NA	2	0	4	2	5	No Change
Gm3531	898.83	0.208194	0.121889	1.70807	0.0876237	0.347105	755	856	713	983	1301	No Change
B230216N24Rik	4.62512	-0.360358	0.995308	-0.362056	0.71731	NA	3	5	6	5	4	No Change
Gm29462	41.7546	-0.0541819	0.340682	-0.159039	0.873638	0.961477	37	38	41	42	53	No Change
Gm3555	45.7679	0.535459	0.326893	1.63803	0.101416	0.374535	36	34	36	57	74	No Change
Prdx2-ps1	195.135	-0.173186	0.200474	-0.863886	0.387651	0.71437	189	227	146	194	226	No Change
Gm29668	35.4017	0.0659176	0.372424	0.176996	0.859511	0.957216	35	34	26	36	49	No Change
Gm29667	81.6301	0.230246	0.249784	0.921779	0.356644	0.691555	65	78	67	91	118	No Change
Psmb6-ps2	46.9482	0.428626	0.329969	1.29899	0.193949	0.52323	28	39	47	52	79	No Change
Rnf152	11.9917	0.0959824	0.611593	0.156939	0.875293	NA	10	11	11	13	16	No Change
Capza1-ps1	392.208	-0.36984	0.154603	-2.39219	0.0167481	0.136515	319	415	455	336	444	No Change
Pign	264.049	-0.248455	0.182948	-1.35806	0.174444	0.495943	181	323	281	234	323	No Change
Gm28404	2.56356	-0.102114	1.46115	-0.0698861	0.944284	NA	2	1	4	5	0	No Change
Gm20302	13.5754	0.0831652	0.588227	0.141383	0.887567	NA	13	9	14	13	20	No Change
Relch	373.306	-0.202294	0.155983	-1.2969	0.194665	0.523999	327	370	386	302	511	No Change
Gm37566	33.5016	-0.645059	0.397094	-1.62445	0.10428	0.378829	23	42	44	24	35	No Change
Gm10193	39.4039	0.243116	0.362706	0.670283	0.502677	0.790256	40	34	26	41	61	No Change
Tnfrsf11a	18.5434	-0.360623	0.530481	-0.679803	0.496629	0.78706	12	18	26	20	16	No Change
Gm7160	7.99345	-0.619065	0.77339	-0.800457	0.423446	NA	5	12	9	7	7	No Change
Zcchc2	422.945	-0.14472	0.144174	-1.00379	0.315479	0.659139	359	408	441	388	545	No Change
Phlpp1	190.923	-0.340053	0.181631	-1.87222	0.0611766	0.285653	168	224	183	173	210	No Change
Gm38235	50.7155	-0.529629	0.321802	-1.64582	0.099801	0.370913	39	69	53	40	54	No Change
Bcl2	25.9423	-1.2153	0.47823	-2.54125	0.0110458	0.106385	36	33	23	9	26	No Change
Gm37053	3.75141	-2.02428	1.25965	-1.60702	0.10805	NA	3	7	5	2	1	No Change
Kdsr	261.719	0.0308536	0.159324	0.193653	0.846448	0.954112	221	263	230	258	364	No Change
Vps4b	526.726	-0.231618	0.138605	-1.67107	0.0947088	0.360975	413	585	550	493	618	No Change
Serpinb8	3.54687	-0.0541303	1.11638	-0.0484875	0.961328	NA	2	4	4	4	4	No Change
Gm5702	42.3555	0.158109	0.349287	0.452664	0.650791	0.871401	40	44	27	47	58	No Change
Gm8141	9.70899	-0.644012	0.753273	-0.854952	0.392578	NA	14	11	6	3	15	No Change
Gm8173	16.4226	-0.368771	0.531391	-0.693974	0.487699	NA	14	20	16	13	20	No Change
Dsel	96.1328	-0.300835	0.247162	-1.21716	0.223545	0.557244	69	108	111	87	110	No Change
Gm6028	24.582	0.256419	0.440315	0.582353	0.560329	0.822026	22	18	22	29	34	No Change
Gm17752	28.9218	0.000226958	0.402824	0.000563418	0.99955	0.999616	21	30	29	28	40	No Change
9330185C12Rik	11.7143	-0.850169	0.646516	-1.315	0.18851	NA	12	14	13	10	8	No Change
Gm4854	4.96806	0.0897369	0.955902	0.0938768	0.925207	NA	6	3	4	5	7	No Change
Gm7200	45.4231	-0.0657529	0.328758	-0.200004	0.841478	0.951468	39	47	41	49	53	No Change
Tsn	722.072	-0.255147	0.135469	-1.88343	0.0596419	0.282038	562	772	799	646	868	No Change
Nifk	448.102	-0.0884963	0.141392	-0.625895	0.531384	0.806414	370	443	449	456	546	No Change
Clasp1	1123.42	-0.1229	0.112405	-1.09337	0.274233	0.617503	943	1222	1038	1093	1393	No Change
Tfcp2l1	2669.5	0.0804116	0.110455	0.728004	0.466611	0.769513	2231	2804	2158	2687	3791	No Change
Gli2	549.643	-0.0548603	0.145329	-0.37749	0.705809	0.894942	519	494	510	562	685	No Change
Inhbb	12.76	0.233042	0.614427	0.379284	0.704477	NA	10	16	7	17	15	No Change
Ralb	261.43	0.352962	0.16193	2.17971	0.0292787	0.187867	206	224	216	286	421	No Change
Tmem185b	78.5724	-0.43554	0.267229	-1.62984	0.103136	0.377185	87	78	74	66	85	No Change
3830432H09Rik	10.7893	-0.543502	0.691181	-0.786339	0.431669	NA	16	7	10	7	13	No Change
Epb41l5	440.4	-0.269924	0.138603	-1.94747	0.0514785	0.259956	362	497	447	390	528	No Change
Gm37219	5.43329	-0.271895	0.940784	-0.289009	0.772574	NA	3	4	9	6	5	No Change
Ptpn4	321.461	-0.450166	0.181877	-2.47511	0.0133196	0.118424	234	377	389	238	387	No Change
Gm3851	38.3231	-0.127922	0.374319	-0.341745	0.732543	0.907415	44	38	26	35	50	No Change
Gm37745	86.1485	-0.546059	0.263766	-2.07024	0.0384296	0.218918	64	105	105	61	99	No Change
Tmem177	59.6359	0.00904651	0.300457	0.0301091	0.97598	0.992638	59	58	46	52	90	No Change
Tmem37	17.2246	0.258992	0.518972	0.499047	0.617746	0.855341	15	18	11	18	27	No Change
Dbi	165.7	0.331992	0.201406	1.64837	0.0992761	0.36999	128	166	121	164	286	No Change
3110009E18Rik	14.0766	-0.199006	0.594126	-0.334956	0.737658	NA	16	12	12	17	12	No Change
Steap3	55.461	0.0224264	0.297986	0.0752599	0.940008	0.982463	42	55	55	56	75	No Change
En1	5.0299	-0.371743	1.02918	-0.361202	0.717948	NA	5	6	4	8	1	No Change
Insig2	89.8565	-0.220978	0.242727	-0.910398	0.362612	0.695764	72	98	93	83	108	No Change
Gm37174	3.91765	0.344872	1.06879	0.322674	0.746942	NA	2	5	3	3	8	No Change
Ccdc93	232.113	0.266378	0.169157	1.57474	0.115317	0.399118	181	198	210	260	343	No Change
Ddx18	385.816	0.0310352	0.143411	0.216407	0.828671	0.947799	313	379	360	410	498	No Change
Gm8392	28.9252	0.12062	0.410977	0.293495	0.769144	0.924216	20	36	22	28	44	No Change
Gm28911	99.2741	0.158319	0.23511	0.673384	0.500703	0.789144	89	91	80	100	149	No Change
Actr3	639.59	-0.282937	0.127429	-2.22035	0.0263953	0.177991	525	722	656	561	765	No Change
Slc35f5	70.9729	-0.146863	0.280178	-0.524178	0.600154	0.844798	70	58	73	65	91	No Change
Gpr39	2.26064	-1.89226	1.67042	-1.13281	0.257296	NA	3	6	0	1	1	No Change
Lypd1	7.73347	-1.50197	0.933121	-1.60962	0.107481	NA	17	4	6	6	2	No Change
Mgat5	147.208	0.150789	0.212648	0.709101	0.478262	0.776407	101	173	118	166	198	No Change
Gm37772	6.41753	0.288433	0.852002	0.338536	0.73496	NA	6	6	4	10	6	No Change
Gm37510	22.7792	0.27219	0.44941	0.60566	0.544741	0.813919	17	23	18	27	32	No Change
Gm8451	937.748	0.240992	0.138056	1.7456	0.0808802	0.332304	835	877	682	1042	1370	No Change
Gm23370	2.15562	1.27106	1.49143	0.852239	0.394081	NA	0	3	1	3	5	No Change
Ccnt2	1138.4	-0.15481	0.132142	-1.17154	0.241381	0.579774	823	1302	1169	1049	1451	No Change
Rab3gap1	286.16	-0.0166481	0.162158	-0.102666	0.918228	0.974883	221	282	290	264	407	No Change
Zranb3	413.534	0.186168	0.14974	1.24327	0.213768	0.545306	335	394	350	392	668	No Change
Gm38248	234.679	0.125501	0.19206	0.653447	0.513468	0.796948	152	252	226	211	379	No Change
Rpl28-ps1	1068.45	0.297641	0.13566	2.19402	0.0282337	0.184206	932	979	770	1154	1675	No Change
Gm37625	90.3286	-0.261544	0.243953	-1.07211	0.283672	0.627472	71	107	90	81	108	No Change
Gm38026	23.8323	0.177875	0.443873	0.400735	0.688615	0.887023	15	27	21	26	34	No Change
R3hdm1	992.472	0.0158652	0.120649	0.131498	0.895381	0.968484	758	1025	947	936	1422	No Change
Gm37588	33.7313	-0.932509	0.406165	-2.29589	0.0216823	0.159646	29	36	50	18	34	No Change
Gm37868	33.9854	-0.33525	0.381675	-0.878363	0.379747	0.708536	24	41	38	29	40	No Change
Gm37407	23.8062	-0.509141	0.450185	-1.13096	0.258072	0.599264	19	29	27	17	28	No Change
Ubxn4	474.667	-0.0464157	0.137956	-0.336452	0.73653	0.909662	400	457	463	486	596	No Change
Lct	12.7949	-0.0341496	0.602444	-0.056685	0.954796	NA	13	10	12	14	15	No Change
Mcm6	2293.65	0.138471	0.101159	1.36884	0.171049	0.491455	1862	2184	2016	2369	3326	No Change
Dars	930.001	-0.0159426	0.122826	-0.129799	0.896725	0.968543	715	968	898	861	1321	No Change
Gm6170	2492.11	0.260935	0.113216	2.30475	0.0211806	0.157771	1968	2502	1896	2835	3612	No Change
Cxcr4	7.4492	-0.232613	0.781318	-0.297718	0.765918	NA	5	8	9	6	10	No Change
Gm15790	135.17	-0.0154424	0.205396	-0.0751834	0.940069	0.982463	105	133	136	135	179	No Change
Rpl31-ps9	437.637	0.24317	0.147245	1.65146	0.0986443	0.368694	384	384	347	487	639	No Change
Cd55b	5.22853	-1.05591	1.018	-1.03724	0.299625	NA	3	11	5	1	7	No Change
Gm15675	19.39	-0.2019	0.506077	-0.398951	0.68993	0.887429	13	21	23	13	30	No Change
Cd55	59.1636	0.167824	0.289278	0.580148	0.561815	0.822252	42	60	54	61	88	No Change
Gm37109	4.05916	0.100672	1.08635	0.0926703	0.926166	NA	1	3	7	4	6	No Change
Zp3r	2.35083	2.05908	1.50586	1.36738	0.171505	NA	0	2	1	2	9	No Change
Pfkfb2	57.4352	0.174669	0.292824	0.596496	0.550844	0.817047	42	60	49	63	81	No Change
Yod1	87.3529	-0.298533	0.25238	-1.18287	0.23686	0.573367	67	102	93	69	113	No Change
AA986860	8.87881	-1.93679	0.844569	-2.29323	0.0218345	NA	7	21	8	2	6	No Change
Mapkapk2	217.253	-0.493852	0.181949	-2.71423	0.00664307	0.0789855	215	234	224	195	207	No Change
Gm25549	2.47588	-3.11666	1.89851	-1.64163	0.100667	NA	0	6	5	1	0	No Change
Gm37084	45.4717	-0.645646	0.337684	-1.91198	0.0558783	0.270919	44	57	46	28	53	No Change
Dyrk3	312.265	-0.0524654	0.159144	-0.329672	0.741648	0.911213	295	308	265	295	422	No Change
Eif2d	480.129	0.247261	0.153724	1.60847	0.107732	0.385099	437	431	353	530	709	No Change
Rassf5	20.6144	0.147485	0.495983	0.297359	0.766192	0.92348	12	19	24	16	37	No Change
Ikbke	11.0287	0.0721136	0.638687	0.112909	0.910103	NA	8	12	10	10	17	No Change
Srgap2	832.71	0.0594593	0.117597	0.505619	0.613124	0.852985	705	808	737	842	1157	No Change
Gm38262	10.0724	-0.650474	0.689151	-0.943877	0.345232	NA	8	15	10	6	12	No Change
Gm37954	30.4561	-0.138856	0.440917	-0.314926	0.752818	0.91716	14	30	44	30	37	No Change
Gm29488	55.9569	-0.203104	0.301437	-0.673785	0.500448	0.788849	49	60	54	44	78	No Change
Gm29487	3.74687	-0.185071	1.10223	-0.167905	0.866658	NA	3	6	2	4	4	No Change
Gm24273	4.54474	-0.00901566	1.10568	-0.00815398	0.993494	NA	0	7	6	7	3	No Change
Fam72a	39.6858	0.183826	0.369181	0.49793	0.618534	0.855728	35	47	22	43	57	No Change
Gm8532	9.42924	-1.07451	0.727558	-1.47687	0.139712	NA	9	14	10	7	6	No Change
Rab7b	3.73087	-1.2674	1.18652	-1.06816	0.285446	NA	2	8	4	1	4	No Change
Slc26a9	9.27613	0.780348	0.71563	1.09044	0.275521	NA	7	9	4	9	21	No Change
Pm20d1	57.163	0.620006	0.302666	2.04848	0.0405129	0.226643	43	41	45	62	110	No Change
Slc41a1	233.056	0.0484354	0.179747	0.269464	0.787572	0.931807	225	214	189	232	325	No Change
Rab29	14.617	0.162463	0.59874	0.271342	0.786128	NA	13	8	17	10	28	No Change
Nucks1	4938.22	-0.0961005	0.11421	-0.84144	0.400101	0.723108	3737	5069	5194	4665	6453	No Change
Gm38067	161.687	-0.162462	0.208203	-0.780303	0.435212	0.749299	131	146	187	140	216	No Change
Slc45a3	23.5554	0.0716621	0.448514	0.159777	0.873057	0.961477	19	26	19	20	38	No Change
Elk4	237.337	-0.0839633	0.197659	-0.424788	0.670991	0.879635	185	220	264	187	362	No Change
Mfsd4a	2.55581	-0.432743	1.33566	-0.323992	0.745944	NA	1	3	4	2	3	No Change
Cdk18	155.554	0.0356298	0.209417	0.170138	0.864902	0.958851	149	160	113	164	203	No Change
Lemd1	6.40815	0.586251	0.8683	0.675171	0.499567	NA	2	8	5	11	7	No Change
Gm29695	33.1161	-0.26004	0.380516	-0.683388	0.494362	0.786503	27	36	35	27	43	No Change
Gm7241	10.7429	0.137117	0.664545	0.206332	0.836531	NA	12	10	6	13	13	No Change
Klhdc8a	3.35445	-0.793882	1.30472	-0.608471	0.542875	NA	6	4	1	0	6	No Change
Nuak2	92.317	0.0852413	0.249921	0.341073	0.733049	0.907659	61	105	85	86	141	No Change
Tmcc2	75.0023	-0.0149417	0.26433	-0.0565268	0.954922	0.98555	55	79	74	80	93	No Change
Dstyk	193.962	0.00992614	0.183246	0.0541683	0.956801	0.986347	150	220	166	185	274	No Change
6030442K20Rik	12.0504	0.0241077	0.616967	0.0390746	0.968831	NA	10	14	9	14	14	No Change
Rbbp5	491.466	0.12954	0.133274	0.971978	0.331062	0.671337	372	485	450	500	718	No Change
Tmem81	80.1449	0.26354	0.265307	0.993342	0.320543	0.662438	51	70	84	84	126	No Change
Cntn2	47.0542	0.580528	0.32638	1.77869	0.0752909	0.319459	29	48	32	61	76	No Change
Nfasc	175.734	-0.292374	0.218465	-1.33831	0.180796	0.505749	205	169	141	156	205	No Change
Lrrn2	8.50354	-0.548653	0.771926	-0.710758	0.477234	NA	10	13	4	5	11	No Change
Mdm4	3205.95	0.0927658	0.116591	0.795653	0.426234	0.742273	2441	3342	2850	2973	4941	No Change
Gm29257	249.259	0.302167	0.166253	1.81751	0.0691386	0.305144	185	226	216	302	349	No Change
Pik3c2b	266.917	0.505147	0.165376	3.05454	0.00225408	0.0391327	187	259	186	319	442	Up
Gm26616	4.29	-0.515571	1.05827	-0.487184	0.626128	NA	6	2	5	3	5	No Change
Ppp1r15b	1303.3	-0.147703	0.116089	-1.27233	0.203255	0.533702	1037	1419	1290	1280	1565	No Change
Plekha6	71.5766	0.826221	0.285294	2.89603	0.00377918	0.055609	49	59	43	77	156	No Change
Ren1	2.33758	0.186137	1.37584	0.13529	0.892383	NA	3	2	1	2	4	No Change
Etnk2	19.87	1.2233	0.494469	2.47396	0.0133626	0.118712	10	17	9	30	41	No Change
Sox13	286.024	0.0888162	0.164584	0.539641	0.589444	0.839468	221	271	275	325	360	No Change
Snrpe	233.007	-0.174853	0.171073	-1.0221	0.306735	0.651726	190	271	215	204	306	No Change
Gm38394	1637.29	-0.111688	0.115001	-0.971189	0.331454	0.671578	1253	1754	1659	1552	2105	No Change
Lax1	8.83022	-0.229867	0.718029	-0.320136	0.748865	NA	8	11	7	7	12	No Change
Atp2b4	165.35	0.425403	0.230264	1.84746	0.0646809	0.293416	120	152	130	139	336	No Change
Gm37368	1.87711	1.56027	1.64577	0.948046	0.343106	NA	1	2	0	1	7	No Change
Btg2	314.991	0.0891734	0.167542	0.532245	0.594557	0.842185	273	311	261	279	500	No Change
Gm38140	2.58415	0.165019	1.34217	0.122949	0.902147	NA	2	4	1	1	6	No Change
Gm8618	12.1497	-0.423563	0.626828	-0.675725	0.499215	NA	8	18	12	9	15	No Change
Chit1	4.23064	-0.0560296	1.02396	-0.0547185	0.956363	NA	3	5	4	3	7	No Change
Chil1	4.86331	0.531249	1.05086	0.505535	0.613183	NA	7	2	2	2	13	No Change
Adora1	6.01824	-0.896928	0.923588	-0.971135	0.331481	NA	9	8	3	5	4	No Change
Ppfia4	237.371	1.38417	0.199545	6.93661	4.01616e-12	3.04344e-09	128	151	119	298	610	Up
Tmem183a	431.506	-0.146886	0.140347	-1.04659	0.295287	0.640184	383	445	405	428	513	No Change
Cyb5r1	278.865	0.0983952	0.167499	0.587439	0.556909	0.820219	258	255	229	275	408	No Change
Adipor1	794.32	-0.029349	0.120493	-0.243575	0.80756	0.940079	673	846	688	773	1066	No Change
Platr1	38.6214	0.16643	0.377527	0.440842	0.659327	0.874563	22	42	39	31	69	No Change
Klhl12	353.63	0.0318943	0.145357	0.219421	0.826322	0.946975	288	346	330	368	467	No Change
Rabif	182.385	0.017761	0.18335	0.0968695	0.92283	0.976228	140	195	167	174	259	No Change
Gm15454	129.199	-0.0596282	0.216866	-0.274955	0.783351	0.930153	101	148	114	140	151	No Change
Mgat4e	11.0977	0.817392	0.680471	1.20122	0.229668	NA	2	11	11	16	19	No Change
Kdm5b	5118.88	0.291723	0.0971868	3.00167	0.00268501	0.0438512	3896	4908	4144	5575	7935	Up
Syt2	3.61812	0.342295	1.09988	0.311212	0.75564	NA	3	3	3	3	7	No Change
Ppp1r12b	139.117	0.187417	0.204982	0.914309	0.360554	0.693914	119	127	115	159	189	No Change
Gm37949	10.8687	-0.351914	0.679414	-0.517967	0.604481	NA	13	6	13	8	14	No Change
Gm37677	79.0565	-0.38542	0.261093	-1.47618	0.139896	0.440895	76	77	86	63	94	No Change
Ube2t	145.359	0.376243	0.214879	1.75095	0.079954	0.329924	119	143	96	150	250	No Change
Lgr6	5.78695	0.232931	0.881022	0.264388	0.791481	NA	3	5	7	6	9	No Change
Ptprv	59.0004	0.663472	0.303615	2.18524	0.0288714	0.186519	42	49	41	60	122	No Change
Gm10535	4.78201	0.547147	0.974053	0.561722	0.574306	NA	5	4	2	5	9	No Change
Ptpn7	13.7168	0.969915	0.594899	1.63038	0.10302	NA	9	6	12	17	29	No Change
Arl8a	208.002	0.468889	0.206505	2.27059	0.0231719	0.166049	182	193	119	253	329	No Change
Gm15445	4.73061	-0.209799	0.978066	-0.214504	0.830154	NA	3	7	4	5	5	No Change
Gm4204	3203.96	-0.0424001	0.123497	-0.343329	0.731351	0.907195	2292	3357	3325	3240	4090	No Change
Elf3	191.705	0.854914	0.212522	4.0227	5.75343e-05	0.00274211	100	176	128	213	417	Up
Rnpep	145.903	-0.1233	0.202603	-0.608577	0.542805	0.813135	130	165	121	135	190	No Change
Timm17a	375.553	-0.0925658	0.146399	-0.632286	0.5272	0.803928	323	358	376	359	486	No Change
Lmod1	5.75957	-0.347853	0.910138	-0.382198	0.702314	NA	7	6	4	7	4	No Change
Shisa4	19.5234	0.350731	0.493173	0.711174	0.476977	0.775404	16	13	19	20	33	No Change
Ipo9	1407.33	-0.0936602	0.109353	-0.856496	0.391723	0.718014	1190	1536	1256	1348	1818	No Change
Gm28277	14.4651	-0.418142	0.608473	-0.687198	0.491958	NA	9	23	13	17	10	No Change
Nav1	815.044	-0.0412437	0.124502	-0.331269	0.740441	0.910836	740	780	738	815	1053	No Change
2610012C04Rik	8.74186	0.920236	0.730549	1.25965	0.207796	NA	3	7	8	11	18	No Change
Gm37333	20.2562	-0.00969679	0.481847	-0.0201242	0.983944	0.994232	14	19	23	21	26	No Change
Gm4793	2.02459	0.988994	1.52606	0.648072	0.516939	NA	2	2	0	2	5	No Change
Csrp1	366.131	-0.090258	0.155179	-0.581638	0.560811	0.822252	355	349	322	341	486	No Change
Phlda3	168.139	-0.113528	0.187268	-0.606233	0.54436	0.813801	144	180	154	153	224	No Change
Tnni1	2.17526	2.59779	1.68397	1.54266	0.122913	NA	0	0	2	2	9	No Change
Lad1	125.733	0.363946	0.209265	1.73916	0.0820063	0.334649	91	114	106	137	205	No Change
Tnnt2	3.95349	0.668914	1.06272	0.629433	0.529066	NA	2	5	2	5	7	No Change
Gm28883	26.3135	0.227463	0.438967	0.518178	0.604334	0.848632	17	35	17	28	40	No Change
Tmem9	91.5559	-0.0018147	0.240418	-0.00754811	0.993978	0.998127	78	89	85	84	132	No Change
Cacna1s	5.85455	0.64826	0.879339	0.737213	0.460993	NA	5	5	3	9	8	No Change
Gm15850	2.88436	0.405534	1.24056	0.326897	0.743746	NA	3	3	1	3	5	No Change
Kif21b	228.656	0.631584	0.185662	3.4018	0.000669429	0.016494	169	212	136	276	408	Up
Mroh3	6.9622	-0.46627	0.859483	-0.542501	0.587474	NA	2	9	11	7	6	No Change
Inava	85.4164	-0.136184	0.258716	-0.526384	0.598621	0.84365	73	105	67	87	100	No Change
Camsap2	598.202	0.0048741	0.132125	0.0368901	0.970573	0.990772	458	620	571	632	760	No Change
9230116N13Rik	3.74644	-0.0820339	1.21017	-0.0677871	0.945955	NA	3	8	0	2	7	No Change
Ddx59	170.173	0.337939	0.188347	1.79424	0.0727746	0.312811	129	154	141	178	282	No Change
Kif14	876.916	0.162167	0.121114	1.33896	0.180584	0.505565	713	800	786	882	1326	No Change
Gm29486	10.0521	0.452268	0.683354	0.661836	0.508077	NA	6	6	12	12	16	No Change
Gm29485	6.31801	-0.0630121	0.878	-0.0717678	0.942787	NA	9	3	5	7	7	No Change
Platr23	2.78913	-3.29976	1.76577	-1.86874	0.061659	NA	3	5	4	1	0	No Change
Zfp281	1095.23	-0.400045	0.142906	-2.79935	0.00512048	0.0671332	834	1207	1314	925	1223	No Change
Gm19705	54.1641	0.111366	0.306281	0.363609	0.71615	0.899998	37	62	47	53	81	No Change
Platr22	142.355	-0.446647	0.201494	-2.21667	0.0266457	0.178448	132	158	148	122	150	No Change
Gm24086	16.6198	-0.834356	0.544202	-1.53317	0.125233	0.416314	19	19	17	13	13	No Change
Gm8762	6.18423	-0.0386109	0.883832	-0.0436858	0.965155	NA	7	4	6	3	12	No Change
Gm29718	42.7063	0.397689	0.370229	1.07417	0.282746	0.626918	41	42	21	42	77	No Change
Nr5a2	314.151	0.0176202	0.155524	0.113296	0.909796	0.972966	261	287	310	309	433	No Change
Gm37534	2.26769	0.0756056	1.46272	0.0516885	0.958777	NA	1	1	4	4	1	No Change
Nek7	278.138	-0.185623	0.164303	-1.12976	0.258576	0.599966	211	307	291	249	355	No Change
Gm37080	10.7098	-0.0812783	0.65682	-0.123745	0.901517	NA	11	12	7	11	13	No Change
Gm37101	28.1739	0.0405462	0.40675	0.0996833	0.920596	0.97543	22	31	24	29	38	No Change
2310009B15Rik	8.56035	-0.645836	0.784542	-0.823201	0.410394	NA	11	10	6	10	4	No Change
Dennd1b	387.784	-0.457448	0.152512	-2.99942	0.00270498	0.0440824	322	440	439	335	401	Down
Gm37423	42.7827	-0.491068	0.34312	-1.43118	0.152377	0.461979	35	55	44	37	43	No Change
4930596I21Rik	12.3332	-0.0273596	0.609658	-0.044877	0.964205	NA	10	11	13	14	14	No Change
Gm16305	12.0071	-0.209214	0.652378	-0.320694	0.748442	NA	17	8	9	9	17	No Change
Gm37470	38.3523	-0.359128	0.375785	-0.955674	0.339237	0.677725	32	32	51	35	41	No Change
Gm43544	16.1171	-0.385997	0.540927	-0.713583	0.475485	NA	13	16	20	13	19	No Change
Gm37718	22.0842	-0.209605	0.472745	-0.443378	0.657492	0.874457	19	18	27	17	31	No Change
Zbtb41	245.141	-0.349298	0.182348	-1.91556	0.0554216	0.27013	179	301	266	198	299	No Change
Aspm	1341.13	0.0821512	0.110862	0.741021	0.458681	0.764373	1034	1359	1224	1321	1946	No Change
Gm5837	304.924	0.123358	0.161999	0.761472	0.446375	0.756986	272	286	248	341	402	No Change
Cfh	2.30057	-1.91747	1.56644	-1.22409	0.220917	NA	2	3	4	1	1	No Change
Kcnt2	32.3081	-1.02716	0.419849	-2.44649	0.0144253	0.124575	38	33	39	26	19	No Change
Gm37777	33.7245	-0.909771	0.387786	-2.34607	0.0189728	0.146935	31	46	38	21	31	No Change
Gm37599	30.3236	-0.450761	0.399858	-1.1273	0.259615	0.601387	32	33	28	25	33	No Change
Gm5835	4369.66	0.270132	0.109585	2.46504	0.0136997	0.120787	3604	4116	3368	5018	6314	No Change
Cdc73	795.393	-0.448805	0.140578	-3.19257	0.00141013	0.028121	633	885	944	633	900	Down
Gm6397	329.615	0.0690169	0.147342	0.468413	0.639489	0.867731	270	319	300	339	454	No Change
Glrx2	111.035	-0.187719	0.230076	-0.8159	0.414557	0.733656	80	126	118	96	146	No Change
Ro60	278.091	-0.450271	0.175386	-2.56731	0.0102491	0.102396	208	340	317	228	306	No Change
Uchl5	382.949	-0.12034	0.146726	-0.820169	0.41212	0.731109	298	400	394	366	485	No Change
Gm29170	92.879	-0.681631	0.251517	-2.71007	0.00672683	0.0795877	76	121	106	75	83	No Change
Rgs2	3.90277	-0.517649	1.11735	-0.463284	0.643161	NA	3	2	7	4	3	No Change
Rbm6-ps2	10.9073	-0.162733	0.656601	-0.247841	0.804257	NA	11	11	9	13	10	No Change
Gm7266	231.289	0.330478	0.181514	1.82067	0.0686568	0.304061	201	211	163	245	377	No Change
Gm8856	7.73389	0.499314	0.816253	0.611715	0.540726	NA	1	11	7	10	12	No Change
Gm5263	69.3063	-0.631557	0.295256	-2.13902	0.0324344	0.199341	53	79	91	60	60	No Change
Gm15583	201.93	0.0873996	0.177012	0.493749	0.621483	0.85749	171	183	186	213	275	No Change
Gm5703	4.38381	0.619761	1.0521	0.589071	0.555814	NA	2	5	3	9	3	No Change
Gm15443	43.3771	-0.0224445	0.333388	-0.0673225	0.946325	0.983913	36	41	43	41	60	No Change
Pla2g4a	18.772	0.0632572	0.49796	0.127033	0.898914	0.968959	14	18	19	16	30	No Change
Ptgs2	7.24074	-1.70162	0.890775	-1.91027	0.0560988	NA	9	6	12	4	3	No Change
Gm9687	17.2285	0.122951	0.517576	0.237551	0.81223	0.941826	12	16	18	16	27	No Change
Rbm3-ps	273.339	-0.276697	0.191095	-1.44795	0.147631	0.454694	304	265	230	263	297	No Change
Gm4322	54.546	0.180135	0.300492	0.599467	0.548862	0.815833	44	47	51	59	78	No Change
Odr4	134.583	0.19875	0.211677	0.938929	0.347767	0.685556	91	145	117	135	210	No Change
Tpr	4181.71	-0.0571373	0.108861	-0.524865	0.599677	0.844361	3358	4051	4278	4171	5346	No Change
Ska2l-ps	15.2797	0.346926	0.568975	0.609739	0.542035	NA	17	10	10	20	20	No Change
Hmcn1	45.025	-0.693359	0.348564	-1.98919	0.0466804	0.2454	52	56	38	28	50	No Change
Ivns1abp	1097.43	-0.451597	0.114771	-3.93476	8.32804e-05	0.00353557	1057	1173	1144	906	1194	Down
Swt1	346.194	-0.434868	0.153429	-2.83432	0.0045923	0.0625907	283	405	381	283	387	No Change
Trmt1l	188.662	-0.148332	0.196653	-0.754283	0.450679	0.759645	143	234	168	194	216	No Change
Gm37893	42.3028	-0.135962	0.360089	-0.377578	0.705744	0.894935	25	49	48	46	46	No Change
Rnf2	500.144	-0.367081	0.1462	-2.51082	0.0120452	0.111959	392	608	525	402	603	No Change
Gm36527	72.1148	-0.586848	0.277888	-2.11181	0.0347026	0.207313	70	77	82	46	86	No Change
Gm19503	22.5269	0.102142	0.451966	0.225994	0.821206	0.944411	20	21	19	23	32	No Change
Fam129a	173.685	0.379924	0.196693	1.93156	0.0534137	0.265181	109	186	136	204	268	No Change
Edem3	381.266	0.107792	0.150274	0.717298	0.47319	0.772812	280	379	363	365	578	No Change
1700025G04Rik	144.11	0.213267	0.200145	1.06556	0.286621	0.631033	111	149	114	159	208	No Change
Tsen15	63.8879	-0.649223	0.291366	-2.22821	0.0258668	0.176117	61	65	79	45	67	No Change
Colgalt2	7.5227	-0.213417	0.819797	-0.260329	0.79461	NA	5	10	7	11	4	No Change
Rgl1	31.5176	0.0380237	0.388606	0.0978463	0.922054	0.975952	25	30	31	28	48	No Change
Gm7278	186.889	-0.275375	0.187156	-1.47136	0.141193	0.442955	181	194	175	179	205	No Change
Arpc5	348.989	-0.56692	0.151405	-3.74438	0.000180839	0.00638879	304	405	398	273	360	Down
Ncf2	10.09	0.657856	0.712381	0.923461	0.355767	NA	12	7	3	13	17	No Change
Smg7	1718.06	0.0809274	0.111933	0.723	0.46968	0.770833	1359	1678	1589	1638	2563	No Change
Gm28791	52.4258	-0.725092	0.344755	-2.10321	0.0354476	0.209187	35	60	78	35	54	No Change
Gm8976	19.1293	0.479224	0.551617	0.868762	0.384977	0.712793	9	30	8	24	30	No Change
Nmnat2	206.808	-0.229744	0.189708	-1.21104	0.22588	0.560851	189	242	176	162	284	No Change
Lamc2	267.651	-0.840796	0.18512	-4.54189	5.57518e-06	0.000515228	292	369	235	187	236	Down
Lamc1	2791.62	-0.238326	0.111229	-2.14265	0.0321412	0.198748	2613	3048	2509	2639	3213	No Change
Gm38009	56.0224	-0.324955	0.305305	-1.06436	0.287165	0.631496	48	68	53	41	75	No Change
Gm8818	14.1092	-0.669461	0.590341	-1.13402	0.256785	NA	11	16	19	8	17	No Change
E330020D12Rik	8.84167	0.559388	0.736811	0.759201	0.447732	NA	10	5	5	9	17	No Change
Shcbp1l	5.80407	0.027134	0.889211	0.0305147	0.975657	NA	3	5	8	5	9	No Change
Dhx9	3855.55	-0.14222	0.101026	-1.40775	0.159205	0.472935	3106	4097	3853	3603	4896	No Change
Npl	22.8657	0.387711	0.448914	0.863663	0.387773	0.714453	18	20	18	24	39	No Change
Gm6652	43.8462	1.02614	0.341215	3.00731	0.00263572	0.0433734	31	31	23	58	91	Up
Rgs16	15.9484	-0.255652	0.53989	-0.473525	0.635838	NA	14	16	17	12	22	No Change
Rnasel	3.78251	1.41627	1.1431	1.23898	0.215353	NA	4	1	1	6	8	No Change
Glul	591.597	-0.135729	0.128345	-1.05753	0.290271	0.635482	501	618	570	585	713	No Change
Cacna1e	3.74756	-0.0186455	1.13875	-0.0163736	0.986936	NA	5	3	2	6	2	No Change
Gm9530	3.01402	1.36182	1.30848	1.04077	0.297981	NA	1	0	4	5	6	No Change
Ier5	69.5653	-0.1762	0.277448	-0.635074	0.52538	0.802688	72	66	61	63	88	No Change
Stx6	161.583	0.1042	0.193137	0.539515	0.589532	0.839513	119	174	141	175	218	No Change
Gm8850	6.66684	1.43554	0.905612	1.58516	0.112929	NA	1	2	8	8	18	No Change
BC034090	47.1327	-0.436907	0.331528	-1.31786	0.187552	0.516368	52	52	40	38	53	No Change
Xpr1	200.778	-0.00148499	0.183772	-0.00808057	0.993553	0.997898	148	194	212	199	271	No Change
Acbd6	197.579	0.0350421	0.187704	0.186689	0.851905	0.955768	169	208	161	223	239	No Change
Qsox1	48.6244	-0.141758	0.326234	-0.43453	0.663904	0.876576	50	50	38	49	57	No Change
Cep350	749.967	0.12011	0.119943	1.0014	0.316635	0.660086	594	762	643	768	1081	No Change
Gm37383	3.49503	-1.08168	1.28285	-0.843187	0.399124	NA	0	9	4	2	3	No Change
Tor1aip1	137.915	-0.346425	0.205177	-1.68842	0.0913303	0.354016	130	142	142	112	167	No Change
9430034N14Rik	38.1275	-0.18295	0.355526	-0.514589	0.60684	0.849906	32	38	40	37	45	No Change
Tor1aip2	839.565	0.190154	0.131072	1.45076	0.146846	0.453186	581	807	809	863	1273	No Change
Fam163a	13.9967	0.0518444	0.573965	0.0903268	0.928028	NA	12	16	10	16	17	No Change
Tdrd5	96.4678	0.191758	0.236663	0.810257	0.417792	0.73541	83	83	84	99	146	No Change
A430050A11Rik	2.43277	0.59907	1.5237	0.393168	0.694196	NA	0	6	0	4	3	No Change
Axdnd1	3.44002	-0.618739	1.14991	-0.538077	0.590524	NA	3	4	4	3	3	No Change
Gm2000	1569.8	0.0893511	0.135789	0.658016	0.510528	0.794982	1425	1626	1153	1660	2137	No Change
Soat1	817.079	-0.26826	0.120844	-2.21989	0.0264261	0.178085	676	931	816	709	1000	No Change
Csnk2a3	1162.71	0.0493617	0.112865	0.437351	0.661857	0.876002	889	1218	1062	1169	1613	No Change
Abl2	1520.09	0.00159718	0.116819	0.0136722	0.989091	0.995661	1243	1409	1520	1550	1997	No Change
Gm38043	181.858	0.0185545	0.187139	0.0991484	0.92102	0.975489	134	183	183	173	259	No Change
Tor3a	133.329	-0.26065	0.211909	-1.23001	0.218692	0.551547	122	154	117	129	147	No Change
Fam20b	297.91	0.262226	0.153461	1.70875	0.0874981	0.34697	234	287	239	321	456	No Change
Gm15428	16.281	0.604388	0.552245	1.09442	0.273771	NA	9	13	15	27	19	No Change
Ralgps2	394.944	0.0619994	0.147732	0.419674	0.674724	0.881654	298	417	359	371	588	No Change
Gm28693	18.8546	-0.398093	0.538085	-0.739834	0.459401	0.764961	8	29	22	17	20	No Change
Gm37802	27.6504	-0.323505	0.414978	-0.779571	0.435643	0.749473	25	31	27	21	36	No Change
Gm37943	29.3282	0.00806029	0.418501	0.0192599	0.984634	0.994279	19	41	22	30	39	No Change
Rasal2	396.481	-0.260198	0.146085	-1.78114	0.0748898	0.318381	330	411	428	358	470	No Change
Gm37788	13.6704	-0.0370635	0.619309	-0.0598466	0.952278	NA	8	23	8	16	15	No Change
Gm37578	7.14899	-0.348092	0.81633	-0.426411	0.669808	NA	4	9	9	4	11	No Change
Gm6058	11.1625	0.0580088	0.64185	0.0903775	0.927987	NA	10	11	9	14	12	No Change
Gm37060	42.0728	-0.189529	0.345359	-0.548789	0.58315	0.835789	34	53	36	35	57	No Change
2810025M15Rik	178.927	0.373473	0.191656	1.94866	0.0513358	0.259868	144	172	124	216	266	No Change
Cryzl2	22.8428	0.684623	0.46095	1.48524	0.137479	0.437057	11	18	22	27	43	No Change
Brinp2	6.96153	-0.568752	0.839531	-0.677464	0.498112	NA	5	8	9	8	4	No Change
Astn1	6.52638	-1.56202	0.939219	-1.6631	0.0962916	NA	7	4	13	3	4	No Change
Cop1	173.621	-0.329898	0.213175	-1.54755	0.121731	0.41063	118	202	205	162	187	No Change
Gm37115	27.579	-0.154592	0.470141	-0.32882	0.742292	0.911329	11	39	31	32	27	No Change
4930523C07Rik	3.36834	-0.999862	1.20684	-0.828494	0.407391	NA	2	7	3	2	3	No Change
Mrps14	146.457	-0.125713	0.202815	-0.619842	0.535362	0.808726	114	174	132	140	185	No Change
Cacybp	1243.54	-0.158928	0.129214	-1.22996	0.218712	0.551547	909	1394	1295	1167	1551	No Change
4933417C20Rik	10.042	0.589064	0.681332	0.864578	0.387271	NA	5	7	11	14	15	No Change
Rabgap1l	226.088	-0.382837	0.184842	-2.07115	0.0383444	0.218806	188	296	209	174	279	No Change
9430087J23Rik	4.67562	-1.05803	1.0664	-0.992149	0.321125	NA	8	5	3	1	6	No Change
Gm37529	19.0708	-0.0831176	0.50063	-0.166026	0.868136	0.960055	12	19	23	19	24	No Change
Gm37212	15.9529	-1.03175	0.569767	-1.81083	0.0701676	NA	11	23	22	10	13	No Change
Gpr52	9.85367	-0.924918	0.706834	-1.30854	0.190692	NA	12	9	12	6	9	No Change
Gm37215	8.58222	-0.916901	0.763797	-1.20045	0.229964	NA	7	8	14	6	7	No Change
Gm38302	13.3027	-0.496139	0.716234	-0.692705	0.488495	NA	11	27	5	4	23	No Change
6720464F23Rik	31.1447	-0.507373	0.397617	-1.27604	0.201943	0.532637	24	39	35	26	32	No Change
Gm37873	2.69051	0.124484	1.32683	0.0938207	0.925252	NA	2	2	3	5	1	No Change
Gm37328	4.7429	-1.8899	1.1459	-1.64927	0.0990917	NA	5	3	10	3	1	No Change
Gm38329	3.93476	0.0470932	1.08083	0.0435713	0.965246	NA	2	5	4	2	8	No Change
Gm6177	43.7898	0.049393	0.334936	0.14747	0.882761	0.963979	30	50	40	44	61	No Change
Rc3h1	1005.85	-0.197496	0.129101	-1.52977	0.126073	0.417746	785	1059	1084	869	1312	No Change
Gm37052	41.2614	0.157331	0.339513	0.463402	0.643077	0.869372	30	42	37	44	59	No Change
Gm37809	14.0127	-0.165371	0.583218	-0.283549	0.776756	NA	16	14	10	11	20	No Change
Gm37653	80.3934	0.113975	0.274924	0.414568	0.678458	0.883167	46	86	85	76	124	No Change
Serpinc1	7.75556	-0.537096	0.796472	-0.674344	0.500092	NA	7	5	12	7	7	No Change
Gm37729	3.32701	0.743528	1.23898	0.600113	0.548431	NA	2	0	5	5	5	No Change
Zbtb37	740.764	0.00604648	0.153894	0.03929	0.968659	0.990113	490	755	805	712	1036	No Change
Gas5	1064.26	-0.0688128	0.117178	-0.587251	0.557035	0.820219	921	1042	1014	1081	1321	No Change
Gm26224	104.232	-0.261902	0.232377	-1.12706	0.259718	0.601418	101	118	88	92	126	No Change
Gm22489	61.4099	-0.0466236	0.291552	-0.159915	0.872948	0.961477	59	54	57	55	87	No Change
Gm22357	124.303	-0.481083	0.227888	-2.11105	0.0347683	0.20746	96	138	154	94	143	No Change
Gm23212	131.116	-0.403099	0.232241	-1.7357	0.0826177	0.336329	121	113	163	105	153	No Change
Snord78	155.193	-1.01714	0.24583	-4.13759	3.50972e-05	0.00191343	105	221	218	94	132	Down
Gm50452	21.9765	-2.03487	0.563947	-3.60826	0.000308254	0.00957357	14	32	42	8	10	Down
Snord80	47.0664	-0.956074	0.366236	-2.61054	0.0090399	0.094554	29	72	63	29	42	No Change
Snord47	19.0289	-1.02256	0.567474	-1.80195	0.071553	0.310555	11	19	36	14	13	No Change
Gm25789	13.9414	-0.659113	0.606485	-1.08678	0.277136	NA	17	18	10	7	18	No Change
Dars2	340.657	0.177842	0.150651	1.18049	0.237804	0.574643	246	329	318	378	475	No Change
Gm37634	28.7985	-0.172237	0.444502	-0.387482	0.698399	0.892562	27	18	37	21	43	No Change
Cenpl	148.812	-0.150857	0.201	-0.750534	0.452933	0.761026	118	149	160	138	189	No Change
Klhl20	151.812	0.0165183	0.201604	0.0819345	0.934699	0.981462	139	151	125	140	221	No Change
Ankrd45	116.605	0.244838	0.230845	1.06062	0.288865	0.633487	73	107	120	136	163	No Change
Gm6185	2.27295	1.256	1.5512	0.809695	0.418115	NA	0	0	4	4	4	No Change
Prdx6	1206.99	-0.135417	0.118249	-1.14519	0.252133	0.592269	1089	1219	1127	1211	1430	No Change
Gm15429	55.512	-0.262318	0.306106	-0.856951	0.391472	0.717951	57	51	54	52	63	No Change
Gm5049	26.6717	0.0667209	0.50104	0.133165	0.894063	0.968164	33	21	16	40	20	No Change
Gm37357	4.92192	-0.0980527	0.952657	-0.102926	0.918022	NA	3	5	6	5	6	No Change
Suco	463.551	-0.215279	0.156794	-1.373	0.169751	0.489885	345	502	512	383	619	No Change
Gm7496	16.1783	-0.0958893	0.550772	-0.1741	0.861787	NA	17	15	13	20	15	No Change
Pigc	28.2289	-0.183641	0.420503	-0.436719	0.662315	0.876303	27	23	31	22	40	No Change
Eef1aknmt	150.556	-0.160145	0.196706	-0.814134	0.415568	0.733947	124	170	140	145	183	No Change
Vamp4	90.1724	-0.400711	0.254522	-1.57437	0.115403	0.399229	76	90	109	68	111	No Change
Prrc2c	7929.2	-0.0115164	0.0951405	-0.121046	0.903655	0.970834	6516	7801	7566	7755	10747	No Change
Gm27616	3.03866	-0.777981	1.26223	-0.616354	0.537661	NA	2	2	6	2	3	No Change
Gorab	43.2642	0.122601	0.359253	0.341268	0.732902	0.907579	21	50	46	45	62	No Change
Rpsa-ps1	181.175	0.191758	0.184686	1.03829	0.299134	0.644172	154	173	144	188	272	No Change
Kifap3	323.069	-0.293081	0.163886	-1.78832	0.0737238	0.31536	281	397	286	308	351	No Change
Scyl3	162.05	0.080024	0.190977	0.419024	0.675198	0.881754	122	163	152	174	216	No Change
BC055324	386.771	0.0396045	0.158956	0.249155	0.803241	0.937899	291	408	360	337	601	No Change
Mettl18	42.027	0.182943	0.335881	0.544666	0.585983	0.837547	32	42	36	45	61	No Change
F5	17.1158	-0.0387917	0.545127	-0.0711608	0.94327	0.983069	21	16	10	14	26	No Change
Slc19a2	499.869	-0.187456	0.136789	-1.3704	0.170561	0.49074	396	542	514	448	636	No Change
Ccdc181	48.4488	0.174195	0.321073	0.54254	0.587447	0.838593	34	47	46	58	62	No Change
Blzf1	156.8	-0.0555854	0.205857	-0.27002	0.787145	0.931736	105	173	164	153	206	No Change
Nme7	133.416	0.164273	0.216627	0.758323	0.448258	0.758433	119	136	95	134	202	No Change
Gm37411	21.4995	-0.323875	0.476367	-0.679885	0.496577	0.78706	17	25	23	14	31	No Change
Atp1b1	358.087	0.0638317	0.151813	0.420464	0.674147	0.881568	265	397	313	354	511	No Change
Gm32391	2.34601	0.76059	1.38733	0.548238	0.583528	NA	1	1	3	4	3	No Change
Gm26685	2.88021	-0.496338	1.31715	-0.376828	0.706301	NA	1	3	5	4	1	No Change
Gm16550	7.30198	0.0366015	0.789115	0.0463829	0.963005	NA	6	7	7	5	13	No Change
Sft2d2	199.981	0.0784042	0.181835	0.431183	0.666335	0.877695	179	201	157	209	273	No Change
Tiprl	195.141	0.00345478	0.188861	0.0182927	0.985405	0.994578	141	203	196	174	290	No Change
Gm38190	68.8866	0.201718	0.275734	0.731566	0.464433	0.768109	52	77	51	75	100	No Change
Gpr161	83.4783	-0.241708	0.252511	-0.957218	0.338457	0.677362	76	96	73	79	96	No Change
Dcaf6	178.362	-0.00521722	0.184175	-0.0283275	0.977401	0.992738	148	188	156	186	228	No Change
Gm37864	26.0693	-0.179845	0.446537	-0.402756	0.687128	0.886957	20	20	35	22	35	No Change
Mpc2	26.5484	-0.194717	0.420576	-0.462977	0.643381	0.869496	24	30	23	25	32	No Change
Gm37860	2.96585	0.493602	1.22188	0.40397	0.686235	NA	2	3	2	5	3	No Change
Mpzl1	339.005	-0.033423	0.159081	-0.2101	0.833589	0.949325	321	345	272	332	450	No Change
Gm37559	25.2755	1.00486	0.438988	2.28904	0.0220771	0.16081	15	22	13	32	54	No Change
Rcsd1	19.8724	0.0182456	0.488895	0.03732	0.97023	0.99063	17	15	22	19	28	No Change
Creg1	38.4996	0.91823	0.373256	2.46005	0.0138917	0.121771	22	33	24	40	90	No Change
Cd247	2.97796	-1.2036	1.40867	-0.854424	0.39287	NA	6	0	4	1	3	No Change
Pou2f1	1397.03	-0.0992467	0.121196	-0.818896	0.412846	0.731909	1065	1434	1464	1310	1834	No Change
Dusp27	240.482	0.0673908	0.188367	0.357763	0.720521	0.902423	175	233	242	287	279	No Change
Gpa33	187.459	0.478872	0.196424	2.43796	0.0147706	0.125978	111	199	141	229	299	No Change
Mael	34.2029	0.472293	0.379207	1.24548	0.212957	0.544049	21	29	32	35	63	No Change
Ildr2	9.68428	-0.199351	0.68408	-0.291415	0.770734	NA	9	9	10	8	13	No Change
Tada1	52.3811	0.0134759	0.304909	0.0441965	0.964748	0.989141	43	55	46	50	74	No Change
Pogk	40.4321	0.0624826	0.354593	0.176209	0.860129	0.957419	35	34	40	34	65	No Change
Gm16418	34.4679	-0.181279	0.385238	-0.470564	0.637952	0.866764	38	28	32	33	41	No Change
Gm6286	232.599	0.276162	0.165703	1.66661	0.0955927	0.362563	183	214	193	251	359	No Change
Fam78b	2.88482	-1.74819	1.42192	-1.22945	0.218902	NA	5	4	2	0	3	No Change
Uck2	2026.68	0.167822	0.108996	1.53971	0.123632	0.413449	1640	2019	1659	2257	2787	No Change
Tmco1	166.17	-0.347462	0.197366	-1.7605	0.078323	0.326475	128	188	187	141	194	No Change
Gm25911	18.4071	-0.894618	0.633266	-1.41271	0.157742	0.471092	23	5	32	13	15	No Change
Aldh9a1	858.029	0.0619417	0.126823	0.488409	0.62526	0.860372	733	895	693	915	1132	No Change
Mgst3	38.9844	0.432876	0.356877	1.21296	0.225147	0.559672	26	43	26	47	61	No Change
Rxrg	4.75913	-0.527274	0.99938	-0.527601	0.597776	NA	3	4	8	3	6	No Change
Pbx1	134.495	-0.386712	0.214632	-1.80175	0.0715854	0.310607	121	150	137	130	131	No Change
Gm37524	24.0607	-0.841145	0.463903	-1.81319	0.0698023	0.306212	20	28	33	13	26	No Change
Gm38381	33.5855	-0.289106	0.38632	-0.748359	0.454243	0.761572	26	46	29	28	42	No Change
Nuf2	252.054	-0.124361	0.161307	-0.77096	0.440731	0.753694	210	261	247	237	323	No Change
Hsd17b7	90.2025	-0.207559	0.2438	-0.851346	0.394577	0.719702	82	91	89	75	120	No Change
3110045C21Rik	4.25848	-0.15905	1.13808	-0.139753	0.888855	NA	0	8	5	2	8	No Change
Ddr2	11.5762	0.60752	0.63962	0.949815	0.342206	NA	8	7	11	18	15	No Change
Uap1	344.914	0.229845	0.147318	1.5602	0.118714	0.405139	260	349	282	373	514	No Change
Uhmk1	519.742	-0.0117411	0.152158	-0.0771636	0.938493	0.981968	359	533	552	497	720	No Change
Gm7694	16.2787	0.0408504	0.532007	0.0767855	0.938794	NA	14	15	15	19	19	No Change
Nos1ap	14.0654	-0.227513	0.571419	-0.398154	0.690517	NA	14	15	12	12	18	No Change
Gm7299	45.4016	0.283443	0.347592	0.815448	0.414816	0.733837	45	43	26	53	65	No Change
Olfml2b	7.15839	-0.416425	0.880316	-0.47304	0.636185	NA	12	6	3	9	4	No Change
Atf6	444.587	-0.00731413	0.143725	-0.0508896	0.959414	0.987369	342	430	455	452	582	No Change
Gm25235	4.81209	-0.496906	0.990708	-0.501566	0.615973	NA	3	4	8	4	5	No Change
Gm9929	10.0037	0.313954	0.711456	0.441284	0.659007	NA	4	14	8	7	21	No Change
Dusp12	149.922	0.00988566	0.19975	0.0494901	0.960529	0.987704	136	138	135	156	194	No Change
Gm26620	4.10097	0.0370113	1.05701	0.0350149	0.972068	NA	4	2	5	3	7	No Change
Gm2962	18.7777	-0.0192004	0.557262	-0.0344548	0.972514	0.99139	15	8	28	20	23	No Change
Fcgr2b	17.4864	0.107658	0.529877	0.203175	0.838998	0.950576	11	15	21	14	30	No Change
Gm26110	74.0741	0.485353	0.307958	1.57603	0.115018	0.398652	74	49	49	106	97	No Change
Fcgr3	30.4345	0.432707	0.395	1.09546	0.273315	0.61719	24	25	24	40	43	No Change
Cfap126	2.98389	0.586577	1.21671	0.482101	0.629734	NA	1	3	3	3	6	No Change
Sdhc	317.484	0.253159	0.152793	1.65688	0.0975438	0.366882	263	291	255	359	460	No Change
Pcp4l1	2.88344	-0.742163	1.38739	-0.534935	0.592695	NA	5	0	4	1	4	No Change
Nr1i3	2.72798	-0.438751	1.33575	-0.328469	0.742557	NA	5	2	1	3	2	No Change
Tomm40l	105.99	0.055244	0.230051	0.240138	0.810223	0.941277	84	106	97	121	129	No Change
Apoa2	36.6187	0.0676983	0.358876	0.18864	0.850375	0.955491	30	38	31	38	50	No Change
Fcer1g	3.01312	-0.839359	1.25742	-0.667524	0.504437	NA	4	3	3	1	4	No Change
Ndufs2	688.052	0.062649	0.123942	0.505472	0.613227	0.852985	585	683	591	681	978	No Change
Adamts4	16.0824	-0.949844	0.55585	-1.70881	0.0874855	NA	17	23	15	11	13	No Change
B4galt3	129.747	0.0356149	0.225927	0.157639	0.874741	0.961477	131	105	113	132	175	No Change
Ppox	71.0272	0.404323	0.282108	1.43322	0.151794	0.460623	49	80	46	77	120	No Change
Usp21	235.807	0.38298	0.174981	2.1887	0.0286187	0.185362	189	216	172	296	338	No Change
Ufc1	155.749	0.0456813	0.207996	0.219625	0.826163	0.946968	136	169	118	176	190	No Change
Rpl27-ps1	201.353	0.303795	0.186834	1.62602	0.103946	0.378203	169	187	150	202	337	No Change
Gm20045	67.2349	-0.788897	0.30291	-2.60439	0.00920375	0.0959311	64	62	95	48	61	No Change
Dedd	269.007	0.272264	0.157067	1.73342	0.0830202	0.337425	199	257	229	296	407	No Change
Nit1	134.319	-0.0331211	0.205166	-0.161436	0.87175	0.961197	121	133	118	131	179	No Change
Pfdn2	254.386	0.235038	0.185293	1.26847	0.204631	0.535028	210	224	216	328	310	No Change
Gm37154	32.9599	-0.745137	0.391323	-1.90415	0.0568912	0.273728	31	39	38	27	27	No Change
Klhdc9	5.91208	0.729566	0.8854	0.823995	0.409942	NA	3	4	6	5	14	No Change
Nectin4	16.5824	0.774449	0.544508	1.42229	0.154941	0.466538	6	15	15	25	26	No Change
Arhgap30	33.7592	1.24906	0.39636	3.15134	0.00162525	0.03118	19	20	21	39	86	Up
Usf1	388.094	0.211865	0.151121	1.40196	0.160929	0.475538	271	365	371	445	537	No Change
Tstd1	15.2622	-0.359744	0.562231	-0.639852	0.522269	NA	17	18	11	11	20	No Change
F11r	317.922	0.0509336	0.148756	0.342396	0.732053	0.907195	256	316	291	326	433	No Change
B930036N10Rik	26.7127	-0.824229	0.459234	-1.79479	0.0726868	0.312611	24	25	40	13	31	No Change
Alyref2	11.6303	-0.215214	0.64976	-0.33122	0.740478	NA	14	8	11	13	11	No Change
Gm37981	9.49711	0.360908	0.706437	0.510884	0.609432	NA	10	5	8	9	17	No Change
Tma7-ps	74.258	-0.244307	0.269439	-0.906724	0.364553	0.696433	75	75	67	60	98	No Change
Vangl2	304.043	0.0375404	0.155976	0.24068	0.809803	0.941231	227	315	289	321	398	No Change
Ncstn	300.978	-0.295556	0.163378	-1.80903	0.0704468	0.307603	303	326	262	268	350	No Change
Copa	1197.63	0.0258185	0.11614	0.222305	0.824076	0.945831	1060	1171	1032	1169	1675	No Change
Gm38164	4.72811	1.26692	1.02852	1.23179	0.218028	NA	4	1	3	10	6	No Change
Pex19	304.891	-0.0125035	0.156701	-0.0797918	0.936403	0.981474	258	334	252	302	408	No Change
Gm10171	121.825	0.102501	0.237692	0.431234	0.666298	0.877695	116	90	115	138	155	No Change
Dcaf8	955.842	-0.0193103	0.12121	-0.159313	0.873422	0.961477	822	1029	797	947	1271	No Change
Pea15a	222.276	-0.153915	0.172173	-0.893958	0.371345	0.701591	205	223	207	217	267	No Change
Casq1	23.3769	0.590512	0.494808	1.19342	0.232706	0.567207	12	33	10	29	40	No Change
Atp1a4	22.2394	0.080627	0.473542	0.170264	0.864803	0.958811	13	20	27	26	27	No Change
Igsf8	359.813	0.347537	0.150796	2.30468	0.0211847	0.157771	264	359	274	388	586	No Change
Atp1a2	132.138	1.19537	0.480201	2.48931	0.0127991	0.116182	71	117	55	137	352	No Change
Kcnj9	11.7301	0.346245	0.634909	0.545345	0.585516	NA	7	8	14	15	16	No Change
Kcnj10	36.0996	0.209973	0.365548	0.574407	0.565692	0.824229	32	34	27	42	49	No Change
Pigm	347.549	-0.456342	0.169135	-2.69809	0.00697376	0.0814286	263	398	419	278	389	No Change
Gm37145	2.11842	0.146739	1.64972	0.0889474	0.929124	NA	1	5	0	0	6	No Change
Igsf9	168.03	-0.296645	0.192589	-1.5403	0.123487	0.413449	154	198	149	140	208	No Change
Tagln2	357.139	-0.0234287	0.172943	-0.135471	0.89224	0.967629	366	332	282	335	497	No Change
Cfap45	5.07603	-0.506997	0.969384	-0.523009	0.600968	NA	4	5	7	2	8	No Change
Dusp23	2.33026	-0.32044	1.38825	-0.230822	0.817453	NA	2	2	3	1	4	No Change
Gm2710	22.5906	0.355542	0.453659	0.783721	0.433204	0.747539	15	21	20	29	31	No Change
Cadm3	11.5027	-1.67424	0.698499	-2.39692	0.0165337	NA	12	16	16	3	9	No Change
Aim2	140.87	0.597386	0.206113	2.89834	0.0037514	0.0552785	99	116	107	156	264	No Change
Spta1	350.529	-0.956537	0.196978	-4.85606	1.19745e-06	0.000153988	365	415	412	286	219	Down
Fmn2	234.703	-0.28836	0.186018	-1.55018	0.121099	0.409592	204	269	224	243	231	No Change
Fh1	311.364	0.205529	0.164134	1.2522	0.210497	0.540688	270	275	259	302	500	No Change
Chml	181.646	-0.254168	0.19534	-1.30116	0.193205	0.522429	138	190	208	170	209	No Change
Exo1	746.868	0.119282	0.122246	0.975753	0.329187	0.670036	614	685	683	770	1068	No Change
Rbm8a2	209.432	0.310671	0.172944	1.79636	0.0724369	0.312245	162	190	173	247	304	No Change
Cep170	434.777	-0.144052	0.141772	-1.01608	0.309592	0.653961	356	440	448	424	528	No Change
3110062G12Rik	2.98297	0.0888318	1.2124	0.0732692	0.941592	NA	2	3	3	4	3	No Change
Gm38104	10.7411	-0.313975	0.650772	-0.482466	0.629475	NA	10	11	11	9	13	No Change
Sdccag8	32.123	-0.0887437	0.39304	-0.225788	0.821366	0.944509	22	31	38	29	44	No Change
Gm38158	16.2982	-0.0272012	0.57716	-0.0471293	0.96241	NA	23	12	9	14	24	No Change
Gm37490	2.6526	0.197398	1.41093	0.139906	0.888734	NA	0	1	6	2	5	No Change
Gm37519	5.26005	-1.4771	1.0134	-1.45757	0.14496	NA	9	5	5	2	4	No Change
Akt3	362.417	-0.0197592	0.152444	-0.129616	0.89687	0.968543	263	386	360	348	497	No Change
Gm37960	13.7852	-0.568138	0.587612	-0.966859	0.333615	NA	10	17	17	11	14	No Change
Gm37106	9.75883	-1.47205	0.804067	-1.83076	0.0671367	NA	6	7	23	5	6	No Change
Gm37598	10.9965	-0.537172	0.658212	-0.816107	0.414439	NA	8	16	11	10	10	No Change
Gm38146	12.1983	0.358828	0.641297	0.559535	0.575797	NA	4	14	13	11	23	No Change
Gm37706	41.2835	-0.26567	0.363885	-0.730092	0.465334	0.768508	24	54	46	35	52	No Change
Gm37463	16.8104	0.158442	0.550768	0.287676	0.773595	0.92541	10	24	11	22	19	No Change
Zbtb18	142.988	0.113696	0.201408	0.564509	0.572408	0.828736	110	153	120	142	211	No Change
Adss	1089.02	-0.114816	0.116484	-0.985684	0.324288	0.666331	868	1177	1059	986	1458	No Change
Gm16585	5.78261	0.0328038	0.883914	0.037112	0.970396	NA	3	6	7	5	9	No Change
Gm37313	4.69359	-1.65719	1.10647	-1.49772	0.134206	NA	3	5	10	1	4	No Change
Gm8010	28.8253	-0.081855	0.425246	-0.192489	0.847359	0.95461	24	40	18	29	36	No Change
Desi2	392.695	-0.195837	0.168035	-1.16545	0.243836	0.582703	286	455	406	407	424	No Change
Gm8023	62.8352	0.0451503	0.287875	0.15684	0.875371	0.961664	49	58	64	56	96	No Change
Gm37486	82.9994	0.280699	0.251004	1.11831	0.263437	0.605864	65	71	74	86	133	No Change
B230369F24Rik	16.5513	-0.0708299	0.569474	-0.124378	0.901016	0.969666	7	15	25	15	23	No Change
Cox20	19.8184	-0.98441	0.514417	-1.91364	0.0556662	0.270409	14	30	25	14	15	No Change
Hnrnpu	8620.03	-0.219646	0.110019	-1.99643	0.0458868	0.242988	7205	8692	9240	8178	10053	No Change
Efcab2	39.7254	0.224367	0.368325	0.609155	0.542422	0.812969	22	34	47	43	59	No Change
Kif26b	9.52213	-1.06097	0.736649	-1.44027	0.149791	NA	8	11	14	8	5	No Change
Smyd3	216.663	0.216898	0.178391	1.21586	0.224038	0.557741	180	220	160	243	308	No Change
Gm5561	111.682	0.0114644	0.226164	0.0506908	0.959572	0.987457	97	118	92	100	166	No Change
Tfb2m	50.2215	-0.325392	0.322686	-1.00839	0.313269	0.658039	38	61	53	37	67	No Change
Cnst	140.925	0.150352	0.202965	0.740776	0.458829	0.764373	122	126	122	143	209	No Change
Sccpdh	72.9249	0.0407732	0.268594	0.151802	0.879343	0.963131	65	76	57	79	93	No Change
Kif28	7.71728	0.696805	0.764323	0.911663	0.361946	NA	6	6	5	8	16	No Change
Ahctf1	2857.47	-0.177161	0.108726	-1.62943	0.103222	0.377335	2296	2975	2992	2604	3609	No Change
Gm10518	4.69935	-0.0307778	0.974627	-0.031579	0.974808	NA	5	5	3	4	7	No Change
Gm37070	85.9672	0.386443	0.249173	1.55091	0.120924	0.409555	72	76	62	96	139	No Change
Cdc42bpa	615.74	-0.227267	0.131066	-1.734	0.0829186	0.337373	510	642	649	576	725	No Change
Gm38169	15.8484	0.0393387	0.553752	0.0710404	0.943366	NA	9	19	16	12	27	No Change
Coq8a	38.2343	0.278866	0.355219	0.785053	0.432422	0.747263	32	37	28	39	62	No Change
Psen2	38.9468	0.1606	0.356004	0.45112	0.651903	0.87162	36	39	27	42	55	No Change
Gm5069	17.2095	0.704154	0.519173	1.3563	0.175004	0.496603	9	14	15	24	28	No Change
Itpkb	62.88	-1.01812	0.301739	-3.37416	0.0007404	0.0176717	63	92	63	44	46	Down
Gm37033	11.7949	-0.737163	0.66378	-1.11055	0.26676	NA	16	14	8	11	8	No Change
Gm36933	5.90567	-1.05667	0.942248	-1.12144	0.262102	NA	5	9	7	1	8	No Change
Parp1	3659.12	0.256723	0.107509	2.38791	0.0169444	0.137185	3040	3419	2860	4047	5440	No Change
Mir6904	2.58594	1.10804	1.44448	0.767086	0.44303	NA	0	3	2	7	1	No Change
Lin9	163.218	-0.324205	0.198525	-1.63307	0.102454	0.376162	134	176	179	155	173	No Change
Mixl1	2.26335	-0.478971	1.45232	-0.329798	0.741553	NA	1	2	4	3	1	No Change
Gm8101	19.7332	-0.0434892	0.506009	-0.0859456	0.93151	0.980149	23	14	17	16	30	No Change
Acbd3	259.462	-0.203011	0.16195	-1.25354	0.210008	0.540113	230	275	249	222	339	No Change
H3f3a	428.169	-0.618376	0.145326	-4.25511	2.0895e-05	0.00129259	368	538	472	313	449	Down
H3f3aos	13.4184	0.234461	0.59582	0.393509	0.693943	NA	11	8	15	16	18	No Change
Sde2	477.255	0.0282136	0.149328	0.188937	0.850142	0.955491	381	421	497	498	626	No Change
Gm20305	24.0953	0.329121	0.447969	0.734696	0.462525	0.766542	15	26	20	22	44	No Change
Lefty2	1068.6	0.126407	0.141904	0.890788	0.373043	0.703225	731	1222	916	1032	1633	No Change
Pycr2	414.106	0.0807266	0.15693	0.514412	0.606964	0.849906	383	417	310	433	566	No Change
Lefty1	747.954	0.0660018	0.139303	0.473802	0.635641	0.865001	620	800	604	846	926	No Change
Tmem63a	174.396	0.0547617	0.184144	0.297385	0.766173	0.92348	147	172	153	182	234	No Change
Ephx1	83.5211	1.32965	0.287992	4.61696	3.8941e-06	0.000380768	51	51	41	96	221	Up
Nvl	1090.41	-0.160819	0.120479	-1.33483	0.181933	0.507563	927	1060	1140	1022	1358	No Change
Cnih4	233.69	-0.120812	0.182806	-0.660875	0.508692	0.794	195	220	249	193	335	No Change
Wdr26	1561.5	-0.204605	0.108516	-1.88548	0.0593653	0.281257	1276	1724	1554	1412	1941	No Change
A430110L20Rik	6.83234	-0.203667	0.814425	-0.250075	0.80253	NA	5	7	8	5	10	No Change
Rpl35a-ps2	109.269	0.409348	0.224255	1.82537	0.0679452	0.30204	89	95	81	124	177	No Change
Gm8146	51.7855	0.141194	0.310454	0.454799	0.649254	0.871036	48	47	41	55	73	No Change
Cnih3	3.45851	-1.975	1.30441	-1.51409	0.130002	NA	3	8	3	1	2	No Change
Dnah14	6.19285	-0.902393	0.916296	-0.984828	0.324709	NA	5	5	11	2	8	No Change
Gm23690	4.38746	0.376204	1.03033	0.36513	0.715014	NA	1	4	6	5	7	No Change
Lbr	1743.74	0.106602	0.11308	0.942715	0.345827	0.683999	1338	1703	1624	1682	2626	No Change
Gm26004	6.83758	1.13099	0.85675	1.3201	0.186803	NA	1	6	6	13	10	No Change
Enah	3808.57	0.0406292	0.106649	0.380961	0.703232	0.893873	2949	3669	3753	3950	5081	No Change
2700078F05Rik	330.346	-0.129244	0.163577	-0.790111	0.429463	0.744917	244	336	365	306	428	No Change
Gm38359	142.759	-0.303663	0.208332	-1.45759	0.144953	0.449909	126	137	161	120	174	No Change
Gm37018	291.191	-0.248058	0.19301	-1.28521	0.19872	0.529872	203	293	363	276	332	No Change
Gm37258	182.245	-0.327656	0.201229	-1.62827	0.103467	0.377564	140	185	222	161	208	No Change
Srp9	144.471	0.0332868	0.209193	0.15912	0.873575	0.961477	106	133	155	152	189	No Change
Degs1	364.159	-0.340664	0.153532	-2.21884	0.0264974	0.178174	308	413	378	280	465	No Change
Fbxo28	297.562	-0.307026	0.157478	-1.94964	0.051219	0.259537	245	348	298	270	337	No Change
Trp53bp2	340.662	-0.012809	0.151751	-0.0844076	0.932732	0.980518	307	348	284	336	457	No Change
Capn2	161.249	-0.920176	0.214203	-4.29581	1.7406e-05	0.00112737	187	216	143	107	138	Down
Susd4	63.9616	0.290602	0.32229	0.901678	0.367228	0.698419	57	46	56	93	68	No Change
Tlr5	3.98315	-0.488847	1.10018	-0.444334	0.656801	NA	5	3	4	5	2	No Change
Disp1	77.0633	-0.0512749	0.259025	-0.197953	0.843082	0.952355	70	72	72	76	100	No Change
BC085271	356.86	-0.380854	0.145776	-2.6126	0.00898573	0.0942476	309	410	367	295	414	No Change
Brox	128.302	-0.107149	0.211021	-0.507767	0.611617	0.852953	119	129	114	128	157	No Change
Aida	129.546	-0.238831	0.213392	-1.11921	0.263049	0.60569	98	148	136	120	153	No Change
Mia3	390.667	0.00534146	0.143161	0.0373108	0.970237	0.99063	305	404	367	408	503	No Change
Taf1a	102.735	-0.320283	0.232858	-1.37544	0.168995	0.489001	94	100	112	89	120	No Change
Dusp10	33.1656	-0.725845	0.391906	-1.85209	0.0640126	0.291694	27	39	43	23	33	No Change
Rpl21-ps1	19.2485	0.479796	0.500007	0.959578	0.337268	0.676231	19	13	13	23	31	No Change
Gm38358	18.5807	0.040171	0.501577	0.0800896	0.936166	0.981462	19	16	15	19	25	No Change
Mtarc2	183.821	0.374416	0.19423	1.9277	0.0538925	0.266469	163	155	131	208	291	No Change
C130074G19Rik	57.4194	-0.109456	0.294744	-0.37136	0.71037	0.897246	54	56	52	55	73	No Change
Mark1	131.179	-0.305953	0.2107	-1.45208	0.14648	0.452531	129	137	123	120	147	No Change
Rab3gap2	571.296	-0.022112	0.127385	-0.173584	0.862192	0.958556	481	577	523	581	738	No Change
Iars2	894.283	0.0980052	0.126424	0.775208	0.438217	0.751824	726	918	755	842	1365	No Change
Gm37785	10.991	0.11491	0.681868	0.168523	0.866172	NA	3	13	14	12	15	No Change
Bpnt1	344.056	-0.100981	0.147596	-0.684174	0.493865	0.786407	285	344	344	330	441	No Change
4930532G15Rik	2.53027	-0.501365	1.36424	-0.367505	0.713243	NA	3	4	1	1	4	No Change
Eprs	3663.89	0.04716	0.0977529	0.48244	0.629493	0.861998	3081	3649	3214	3729	5010	No Change
Slc30a10	4.54568	-0.799218	1.10743	-0.721688	0.470487	NA	1	10	5	1	7	No Change
5033404E19Rik	6.49469	-0.945245	0.865134	-1.0926	0.27457	NA	8	7	7	3	7	No Change
Gm9722	7.56635	-0.0425165	0.781326	-0.0544158	0.956604	NA	7	6	8	5	13	No Change
Lyplal1	28.6582	-0.557955	0.436176	-1.2792	0.200827	0.531471	34	30	26	15	39	No Change
Gm38268	5.39291	0.42751	0.921567	0.463895	0.642723	NA	3	3	7	6	9	No Change
Tgfb2	23.4233	-1.76929	0.499301	-3.54354	0.000394794	0.0114935	25	35	30	12	10	Down
Gm37849	7.31494	-0.26257	0.811611	-0.323517	0.746304	NA	3	10	9	8	7	No Change
Rrp15	313.238	0.137148	0.164189	0.835304	0.403546	0.725694	265	287	273	370	392	No Change
A430105J06Rik	4.74657	-3.17966	1.35628	-2.3444	0.0190579	NA	4	11	6	0	2	No Change
Gm3809	21.7553	0.50992	0.468925	1.08742	0.27685	0.620793	19	20	12	26	36	No Change
Gm37912	4.70823	-0.963907	1.0065	-0.957686	0.338221	NA	5	5	6	3	4	No Change
D1Pas1	308.974	-0.266732	0.347544	-0.767478	0.442797	0.754897	193	369	362	323	305	No Change
Gpatch2	218.622	-0.273191	0.189838	-1.43908	0.150128	0.457908	179	251	218	227	218	No Change
Gm37254	63.9641	-0.544586	0.306583	-1.77631	0.0756822	0.320402	48	65	89	48	70	No Change
Kctd3	710.445	-0.119896	0.131902	-0.908984	0.363359	0.696072	658	741	615	712	855	No Change
Kcnk2	2.52864	-0.0210642	1.36645	-0.0154153	0.987701	NA	1	1	5	2	4	No Change
Pdcd5-ps	154.909	0.121801	0.209947	0.580152	0.561812	0.822252	143	136	129	183	191	No Change
Gm38122	8.97247	-0.00982008	0.728987	-0.0134709	0.989252	NA	8	10	7	5	17	No Change
Cenpf	3673.12	0.290885	0.104066	2.7952	0.00518682	0.067741	2590	3510	3215	3953	5755	No Change
Ptpn14	1084.87	-0.481278	0.124122	-3.87747	0.000105547	0.00422078	1104	1216	1036	921	1114	Down
Gm30280	10.6726	-0.00270165	0.655803	-0.00411961	0.996713	NA	11	8	10	10	15	No Change
Gm37422	11.016	-0.159704	0.657799	-0.242785	0.808172	NA	10	14	8	7	18	No Change
Smyd2	233.048	-0.0323938	0.166491	-0.194568	0.845732	0.953926	190	252	207	230	308	No Change
Gm38245	35.8861	0.371362	0.396753	0.936004	0.349271	0.686196	18	37	35	30	71	No Change
Prox1	10.3153	-0.711114	0.694356	-1.02413	0.305772	NA	14	11	8	9	8	No Change
Rps6kc1	137.958	0.178109	0.211989	0.840181	0.400807	0.723428	103	155	105	156	189	No Change
Angel2	273.122	-0.177392	0.165481	-1.07198	0.28373	0.627472	208	314	272	240	357	No Change
Vash2	99.6188	-0.394836	0.235135	-1.67919	0.0931151	0.358482	90	121	93	88	107	No Change
Flvcr1	102.561	-0.882587	0.236616	-3.73004	0.000191452	0.00667045	101	118	126	69	90	Down
Tatdn3	18.2711	0.372905	0.501157	0.744089	0.456823	0.763723	12	16	17	23	26	No Change
Nsl1	259.704	0.202509	0.159928	1.26625	0.205425	0.535481	196	245	234	273	389	No Change
Batf3	5.24407	0.398643	0.926812	0.430123	0.667107	NA	3	5	5	4	11	No Change
Atf3	30.2617	-0.168318	0.425196	-0.395861	0.692208	0.889392	30	29	27	38	25	No Change
D730003I15Rik	9.16745	0.282822	0.718128	0.393832	0.693705	NA	10	9	4	10	14	No Change
Nenf	40.8727	0.0911495	0.345678	0.263683	0.792024	0.933514	37	35	37	39	61	No Change
Pacc1	48.9977	0.0135693	0.343764	0.0394725	0.968514	0.990113	40	48	47	33	87	No Change
Ppp2r5a	286.475	-0.110538	0.15761	-0.701338	0.483092	0.778495	228	294	292	269	372	No Change
Gm2272	58.5672	-0.197859	0.298578	-0.66267	0.507542	0.793185	46	62	62	61	63	No Change
9430037O13Rik	24.8103	-0.365949	0.442019	-0.827903	0.407725	0.727919	21	24	30	19	31	No Change
Dtl	679.465	-0.110565	0.130582	-0.846709	0.397157	0.720618	515	757	667	635	887	No Change
Ints7	626.183	-0.152373	0.127593	-1.19421	0.232396	0.567099	540	671	585	618	745	No Change
Gm37349	17.1246	0.0217247	0.528997	0.0410677	0.967242	0.990113	19	13	14	18	22	No Change
Lpgat1	378.125	-0.364047	0.14307	-2.54453	0.0109424	0.105902	352	414	376	310	448	No Change
Gm38037	4.04826	0.629915	1.1212	0.56182	0.574238	NA	5	4	0	5	7	No Change
Nek2	679.41	0.24116	0.124969	1.92975	0.0536374	0.265924	494	671	585	716	1046	No Change
1700034H15Rik	9.6941	-0.844789	0.718522	-1.17573	0.239702	NA	9	15	9	4	12	No Change
Slc30a1	186.927	-0.155104	0.203413	-0.762507	0.445757	0.756349	145	176	216	153	263	No Change
Gm32460	7.82936	-0.272277	0.781836	-0.348253	0.72765	NA	9	7	7	4	13	No Change
Traf5	7.61038	-0.478234	0.792483	-0.603463	0.546201	NA	5	9	10	4	11	No Change
Gstp-ps	393.561	0.525787	0.157528	3.33774	0.00084463	0.0192123	321	337	259	476	652	Up
Rcor3	69.8431	-0.137908	0.27034	-0.510127	0.609962	0.851904	63	68	68	62	93	No Change
Gm10516	2.43414	-0.991178	1.52781	-0.648759	0.516494	NA	1	7	1	0	4	No Change
Kcnh1	15.269	1.06829	0.551639	1.93658	0.0527966	NA	10	9	10	22	30	No Change
Hhat	9.61996	0.393097	0.722409	0.544148	0.58634	NA	12	6	5	8	19	No Change
Sertad4	69.9024	-0.932566	0.279063	-3.34178	0.000832432	0.0190867	67	89	82	49	56	Down
Gm2367	8.99806	0.792104	0.721888	1.09727	0.272524	NA	8	6	5	9	20	No Change
Syt14	239.276	-0.208729	0.174387	-1.19693	0.231333	0.56641	178	276	247	224	287	No Change
Gm23583	3.38614	-1.28641	1.2338	-1.04264	0.297115	NA	4	4	4	3	1	No Change
Utp25	297.272	-0.235349	0.170353	-1.38154	0.167113	0.486275	262	274	330	285	338	No Change
Irf6	80.4043	0.0717609	0.25545	0.280919	0.778772	0.928352	64	89	65	79	116	No Change
A130010J15Rik	53.2676	0.497566	0.305448	1.62897	0.103319	0.377564	43	42	40	67	83	No Change
Lamb3	16.8555	0.00901024	0.532426	0.016923	0.986498	0.994967	18	17	11	15	25	No Change
Mir205hg	12.804	0.419028	0.601168	0.697024	0.485788	NA	11	13	7	16	19	No Change
Plxna2	57.9372	-0.192275	0.317963	-0.604708	0.545373	0.814431	56	73	39	60	63	No Change
Gm37783	3.23917	-0.236058	1.31115	-0.180039	0.857122	NA	7	2	0	2	5	No Change
Gm37674	3.03457	-0.268871	1.25294	-0.214591	0.830086	NA	3	5	1	4	2	No Change
Gm38036	2.87704	0.00624792	1.23267	0.00506859	0.995956	NA	2	3	3	2	5	No Change
Gm19777	10.8105	0.355355	0.672988	0.528026	0.597481	NA	9	14	4	13	16	No Change
Cd34	9.51947	-0.439777	0.720997	-0.609956	0.541891	NA	12	12	5	9	9	No Change
A330023F24Rik	14.3386	-0.0344222	0.608892	-0.0565325	0.954918	NA	7	19	15	8	27	No Change
Gm37334	22.9098	0.0404947	0.455811	0.088841	0.929208	0.97936	23	22	17	21	34	No Change
9630010A21Rik	14.1635	0.546561	0.592531	0.922417	0.356311	NA	8	14	11	24	15	No Change
Cd46	3.81926	-1.1967	1.1867	-1.00843	0.31325	NA	8	3	2	2	3	No Change
Gm37132	2.71607	-2.2006	1.50294	-1.4642	0.143139	NA	2	4	5	1	1	No Change
Cr1l	102.56	-0.199576	0.235818	-0.846314	0.397377	0.720618	93	100	103	105	112	No Change
Cr2	3.13843	-0.186051	1.24301	-0.149678	0.881018	NA	2	1	6	2	5	No Change
Fam171a1	99.315	-0.402683	0.248341	-1.62149	0.104912	0.379992	85	137	84	80	116	No Change
Nmt2	968.732	-0.0163508	0.143193	-0.114187	0.90909	0.972759	698	975	1018	855	1432	No Change
Rpp38	45.0446	-0.486409	0.336806	-1.44418	0.148688	0.456137	44	56	40	40	44	No Change
Acbd7	3.06998	-0.220566	1.25622	-0.175579	0.860625	NA	4	4	1	1	6	No Change
Dclre1c	113.711	0.0301417	0.225306	0.133781	0.893576	0.967983	84	128	101	104	169	No Change
Suv39h2	231.777	-0.17123	0.17199	-0.995584	0.319453	0.661333	211	220	234	207	299	No Change
Hspa14	392.17	-0.0915217	0.145186	-0.630375	0.528449	0.8047	316	437	359	355	535	No Change
Gm45902	140.479	0.286992	0.209605	1.36921	0.170935	0.491348	90	134	133	167	199	No Change
Cdnf	4.09438	0.794422	1.16517	0.681808	0.49536	NA	3	6	0	2	12	No Change
Gm13186	9.80875	0.228759	0.701199	0.326239	0.744243	NA	11	10	4	11	14	No Change
Gm13182	37.9664	0.143144	0.361855	0.395583	0.692413	0.88949	27	44	30	45	48	No Change
Fam107b	156.822	-0.422648	0.200461	-2.10838	0.034998	0.207985	164	171	143	131	173	No Change
Gm13181	62.0064	0.0330646	0.288325	0.114678	0.9087	0.972644	54	52	62	62	85	No Change
Frmd4a	157.03	-0.154653	0.204348	-0.756809	0.449165	0.758682	126	189	138	162	178	No Change
Prpf18	304.724	0.247544	0.151521	1.63373	0.102316	0.375838	230	300	252	338	449	No Change
Gm13196	130.811	0.380873	0.218386	1.74404	0.0811528	0.332509	115	114	90	158	195	No Change
Bend7	24.4295	0.22401	0.434068	0.516072	0.605804	0.849674	19	22	22	25	38	No Change
Gm13176	37.5744	0.637876	0.359327	1.7752	0.0758655	0.320909	27	26	31	50	61	No Change
Sephs1	536.722	-0.248286	0.135719	-1.82941	0.0673384	0.300083	441	563	575	490	636	No Change
Phyh	122.182	0.641798	0.22917	2.80053	0.00510188	0.0670052	73	124	81	140	230	No Change
Gm13194	2.16294	1.08177	1.52944	0.707302	0.479379	NA	2	0	2	1	7	No Change
Gm13192	150.43	0.107405	0.237596	0.452048	0.651235	0.871497	163	125	107	172	190	No Change
Mcm10	925.091	0.253147	0.117371	2.15681	0.0310204	0.194034	699	926	747	1010	1390	No Change
Optn	117.782	0.60356	0.237778	2.53833	0.0111381	0.106743	90	115	64	147	200	No Change
Ccdc3	16.0108	0.18371	0.541609	0.339193	0.734465	NA	14	18	10	15	26	No Change
Gm13198	2.92158	-0.432247	1.2862	-0.336065	0.736822	NA	4	4	1	1	5	No Change
Camk1d	80.1613	0.137779	0.278828	0.494136	0.62121	0.857454	46	98	72	75	127	No Change
Gm13216	50.999	0.5179	0.316213	1.63782	0.101459	0.374596	42	44	33	67	77	No Change
Cdc123	249.175	-0.116647	0.164715	-0.708177	0.478835	0.776839	204	249	255	233	323	No Change
Nudt5	347.851	-0.593936	0.147406	-4.02925	5.59551e-05	0.00269039	325	398	384	267	356	Down
Gm13199	2.16475	-0.0416815	1.40962	-0.0295693	0.976411	NA	2	2	2	2	3	No Change
Sec61a2	285.846	-0.0377485	0.157921	-0.239034	0.811079	0.94131	228	280	287	285	372	No Change
Dhtkd1	199.227	0.345329	0.177505	1.94546	0.0517201	0.260769	140	191	166	214	325	No Change
Upf2	560.661	-0.00626271	0.135949	-0.0460667	0.963257	0.988517	424	567	560	529	789	No Change
Proser2	19.6473	0.456926	0.481451	0.949059	0.342591	0.680958	14	16	17	23	32	No Change
Gm13384	40.8097	0.0802006	0.348284	0.230274	0.817879	0.943389	36	45	29	41	58	No Change
Echdc3	2.90465	-0.510608	1.28699	-0.396747	0.691554	NA	2	3	4	4	1	No Change
Usp6nl	461.694	-0.132388	0.146533	-0.903466	0.366279	0.697786	371	500	449	482	525	No Change
Celf2	74.0003	-0.360611	0.266748	-1.35188	0.176414	0.499499	59	88	78	60	89	No Change
Gm26315	3746.32	-0.0229485	0.119408	-0.192185	0.847597	0.95461	3471	3880	2996	3713	4963	No Change
Gm13217	136.331	-0.066505	0.218091	-0.304942	0.760411	0.921052	133	147	101	132	178	No Change
Gata3	8.81332	-0.895831	0.768283	-1.16602	0.243607	NA	13	9	7	8	5	No Change
Taf3	313.609	0.37495	0.163356	2.2953	0.021716	0.15977	240	241	286	371	476	No Change
Atp5c1	692.705	0.0116768	0.122881	0.0950249	0.924295	0.977258	571	713	619	662	977	No Change
Gm23608	2.86174	-1.14524	1.32217	-0.866183	0.38639	NA	3	2	5	1	3	No Change
Kin	82.7859	-0.0489597	0.263753	-0.185627	0.852737	0.956044	84	69	75	85	103	No Change
Itih5	7.95125	0.804909	0.762021	1.05628	0.29084	NA	3	6	8	11	14	No Change
Gm13261	37.1145	0.484484	0.392497	1.23437	0.217067	0.549318	27	45	17	48	56	No Change
Sfmbt2	886.847	-0.588795	0.154343	-3.81485	0.000136267	0.00518912	682	1128	1035	752	818	Down
Gm22072	5.94857	0.13091	0.904192	0.144781	0.884883	NA	2	7	7	9	5	No Change
Gm22677	6.39421	-0.469598	0.852233	-0.551021	0.581619	NA	4	8	8	6	6	No Change
Mir669f	2.33162	0.85912	1.44772	0.593429	0.552894	NA	0	3	2	5	2	No Change
Mir669e	3.91488	-1.53963	1.20996	-1.27247	0.203208	NA	6	2	6	3	1	No Change
Mir669b	2.42478	-0.827934	1.38998	-0.595643	0.551414	NA	3	2	3	1	3	No Change
Mir669d-2	2.61857	-1.49757	1.50993	-0.991816	0.321287	NA	0	3	7	1	2	No Change
Mir466f-3	2.29648	-2.03402	1.61977	-1.25575	0.209207	NA	4	3	2	0	2	No Change
Gm26073	3.77631	-0.149859	1.14367	-0.131033	0.895749	NA	2	3	6	1	8	No Change
Mir669k	4.62123	-1.78611	1.17596	-1.51885	0.128801	NA	4	10	4	4	0	No Change
Gm26491	3.92858	-1.20468	1.12635	-1.06954	0.284825	NA	4	6	4	3	2	No Change
Gm25701	4.13634	-1.64032	1.17901	-1.39127	0.164143	NA	7	3	5	3	1	No Change
Mir669j	2.37863	-1.33144	1.53247	-0.868818	0.384947	NA	0	4	5	1	2	No Change
Gm24315	3.52791	-1.25115	1.32867	-0.941657	0.346368	NA	5	1	6	4	0	No Change
Gm25451	4.14637	-1.4563	1.15056	-1.26573	0.205611	NA	2	9	5	1	4	No Change
Mir466c-1	2.25034	-3.06431	1.87349	-1.63562	0.10192	NA	1	5	4	0	1	No Change
Gm24761	3.52678	-1.23474	1.24021	-0.995593	0.319448	NA	3	6	4	0	5	No Change
Gm23651	2.81357	-3.30904	1.76472	-1.87511	0.060778	NA	4	5	3	1	0	No Change
Gm25680	3.18545	-1.36298	1.29715	-1.05075	0.293373	NA	1	5	6	1	3	No Change
Gm22775	2.33939	-2.05942	1.64074	-1.25517	0.209415	NA	4	1	4	0	2	No Change
Gm26229	2.70329	-0.852047	1.33982	-0.63594	0.524815	NA	2	3	4	3	1	No Change
Gm24167	2.41789	-1.83952	1.71003	-1.07572	0.282052	NA	2	0	7	2	0	No Change
Gm24640	3.84683	-0.10934	1.143	-0.0956604	0.92379	NA	1	4	6	6	2	No Change
Gm23288	3.64981	0.022574	1.17155	0.0192684	0.984627	NA	1	3	6	6	2	No Change
Gm22635	3.86991	-0.448229	1.11029	-0.403704	0.68643	NA	3	6	3	5	2	No Change
Gm23569	3.20144	-0.08288	1.17987	-0.0702449	0.943999	NA	2	3	4	4	3	No Change
Gm24488	4.54291	-4.05447	1.63353	-2.48203	0.0130638	NA	5	7	8	1	0	No Change
Gm24028	2.49027	-3.21416	1.84387	-1.74316	0.0813064	NA	1	4	6	0	1	No Change
Gm22166	3.84386	-1.68772	1.20717	-1.39809	0.162087	NA	2	6	7	1	3	No Change
Gm23571	6.8467	-1.96315	0.958577	-2.04798	0.0405617	NA	4	17	7	2	4	No Change
Gm25316	3.33546	0.158596	1.17809	0.134621	0.892912	NA	1	5	3	5	3	No Change
Gm26398	4.07834	-0.619752	1.07188	-0.578193	0.563134	NA	3	4	6	4	3	No Change
Gm22051	5.59058	-1.84815	1.01774	-1.81593	0.0693804	NA	4	10	8	3	2	No Change
Gm24806	6.97458	0.985848	0.818089	1.20506	0.228179	NA	2	6	6	11	12	No Change
Mir669i	6.99303	-0.80542	0.840089	-0.958731	0.337694	NA	6	6	11	6	5	No Change
Mir669h	4.92056	-0.345199	0.95739	-0.360562	0.718427	NA	4	7	4	4	6	No Change
Gm13294	6.23278	-0.615908	0.903829	-0.681443	0.495591	NA	3	5	12	5	6	No Change
Gm13292	311.189	0.457067	0.164752	2.77428	0.00553246	0.0711645	235	305	207	380	487	No Change
Pfkfb3	124.705	-0.0353785	0.259183	-0.1365	0.891426	0.967306	90	175	88	104	190	No Change
Gm37975	3.70965	0.0403843	1.10381	0.0365863	0.970815	NA	3	2	5	3	6	No Change
Rbm17	521.33	0.0673106	0.154955	0.434388	0.664006	0.876579	459	461	478	605	625	No Change
Il15ra	5.4829	0.249088	0.93147	0.267414	0.78915	NA	6	5	3	3	12	No Change
Fbh1	329.941	0.169726	0.147356	1.15181	0.249399	0.589136	262	321	282	359	466	No Change
Ankrd16	83.8316	-0.212844	0.258328	-0.823929	0.40998	0.729372	77	97	71	66	116	No Change
Gm13310	34.6846	0.275064	0.367497	0.74848	0.454171	0.761572	27	31	30	37	54	No Change
Itga8	11.8574	-0.565974	0.68019	-0.832083	0.405362	NA	11	12	14	15	5	No Change
Mindy3	143.93	0.132147	0.214845	0.61508	0.538502	0.810481	91	159	136	139	221	No Change
Gm37289	11.3041	-0.492626	0.640523	-0.769099	0.441834	NA	11	12	12	10	11	No Change
Gm37255	20.724	0.292484	0.493858	0.592243	0.553688	0.818659	14	21	18	15	42	No Change
Gm38014	25.8237	-0.188849	0.430835	-0.438332	0.661146	0.875464	25	23	26	26	29	No Change
Pter	20.1458	0.17735	0.507599	0.349389	0.726797	0.905186	19	24	10	17	35	No Change
Rsu1	138.886	-0.0949201	0.227485	-0.417259	0.676489	0.882043	121	134	135	163	140	No Change
Gm38156	9.90068	-1.35368	0.719335	-1.88185	0.0598563	NA	11	13	12	5	7	No Change
Gm37780	19.7886	-0.526451	0.492472	-1.069	0.285071	0.628807	18	20	24	14	23	No Change
Gm37160	7.77662	0.647535	0.779444	0.830765	0.406106	NA	3	10	5	8	16	No Change
Cubn	13.5057	-0.421014	0.608157	-0.692277	0.488763	NA	11	10	20	12	14	No Change
Trdmt1	37.4033	-0.161285	0.38616	-0.417664	0.676193	0.881884	45	33	28	29	54	No Change
Vim	540.651	-0.0957302	0.146853	-0.651876	0.514481	0.797695	497	514	507	574	622	No Change
St8sia6	10.4297	0.0450376	0.684293	0.0658163	0.947524	NA	5	12	12	7	19	No Change
Hacd1	7.46657	-0.26323	0.782261	-0.336499	0.736495	NA	7	7	8	5	11	No Change
D930036K23Rik	4.11736	-3.95443	1.67329	-2.36326	0.0181148	NA	5	4	9	0	1	No Change
Gm37894	4.21054	0.226203	1.02718	0.220217	0.825702	NA	2	4	5	4	7	No Change
Stamos	2.33485	0.596556	1.47462	0.404548	0.68581	NA	4	0	1	2	5	No Change
Stam	327.498	-0.127846	0.173131	-0.738436	0.460249	0.76516	222	358	361	299	431	No Change
Gm37499	25.9609	-0.246103	0.454494	-0.541487	0.588172	0.838755	19	27	31	15	42	No Change
Gm13320	7.45361	0.0153692	0.86883	0.0176895	0.985887	NA	10	4	6	2	17	No Change
Mrc1	2.88184	-0.984424	1.34397	-0.732476	0.463878	NA	3	6	1	3	1	No Change
Cacnb2	10.4878	-1.72768	0.734021	-2.35372	0.0185868	NA	11	15	14	6	4	No Change
Gm13268	255.625	0.665866	0.192851	3.45275	0.000554903	0.0144256	192	221	157	271	516	Up
2900092N22Rik	4.94016	-1.08087	1.04987	-1.02952	0.303234	NA	1	10	7	3	4	No Change
Gm37006	6.55561	-2.38507	1.04852	-2.27469	0.0229245	NA	9	7	10	4	0	No Change
Gm13315	49.2049	0.211477	0.33802	0.625634	0.531555	0.806512	27	63	40	50	77	No Change
Gm13316	91.0802	0.0442804	0.256769	0.172452	0.863082	0.958556	56	110	85	95	122	No Change
Nsun6	89.23	0.21619	0.243745	0.886949	0.375106	0.705436	73	90	68	93	136	No Change
Gm36930	11.1981	0.23969	0.692728	0.34601	0.729336	NA	7	15	7	19	8	No Change
Arl5b	434.211	-0.365097	0.159667	-2.28662	0.0222183	0.161351	318	517	489	373	493	No Change
Gm38257	43.9535	-0.441219	0.343387	-1.2849	0.198827	0.529971	34	59	44	32	54	No Change
Gm13313	20.0046	0.528748	0.488418	1.08257	0.278998	0.62312	13	16	18	19	40	No Change
Gm13365	3.45099	-0.0714117	1.14674	-0.0622738	0.950345	NA	2	6	2	3	5	No Change
Gm13368	8.42403	-0.681696	0.757562	-0.899856	0.368197	NA	8	8	11	8	6	No Change
Gm37416	3.19984	-0.819406	1.24337	-0.659022	0.509882	NA	1	6	4	3	2	No Change
Plxdc2	258.342	-0.119129	0.17748	-0.671225	0.502077	0.789939	184	286	269	266	303	No Change
Nebl	31.3823	-0.444199	0.432702	-1.02657	0.304623	0.64953	30	21	44	30	29	No Change
A930004D18Rik	20.5981	-0.951995	0.500895	-1.90059	0.0573563	0.275354	20	25	25	17	13	No Change
Skida1	16.2946	-1.38993	0.610939	-2.27507	0.022902	NA	10	19	31	10	9	No Change
Mllt10	849.543	-0.104931	0.115738	-0.906627	0.364604	0.696433	712	886	810	797	1109	No Change
Gm25147	5.66363	-1.21244	0.986076	-1.22956	0.218863	NA	4	5	11	5	2	No Change
Gm13351	2.22205	0.548325	1.42014	0.386107	0.699417	NA	2	1	2	4	2	No Change
Dnajc1	104.982	-0.0429573	0.229743	-0.18698	0.851677	0.955654	81	103	109	97	146	No Change
Gm13349	3.95485	0.961529	1.07486	0.894562	0.371021	NA	1	3	4	6	7	No Change
Gm13352	4.58772	0.464601	0.987185	0.470632	0.637904	NA	4	5	2	5	8	No Change
Commd3	48.6798	-0.482301	0.31952	-1.50945	0.131183	0.42638	48	56	47	39	53	No Change
Bmi1	23.7761	-0.907159	0.462298	-1.96228	0.0497295	0.254285	21	34	26	18	18	No Change
Gm13333	6.05839	0.159317	0.868934	0.183347	0.854526	NA	3	5	8	7	8	No Change
Pip4k2a	69.5899	-0.0662025	0.269829	-0.245349	0.806186	0.939455	62	73	60	65	94	No Change
Gm13332	6.99538	0.21725	0.803115	0.27051	0.786768	NA	7	7	4	7	11	No Change
Msrb2	20.3544	-0.203097	0.506903	-0.400662	0.688669	0.887023	24	19	15	24	18	No Change
Otud1	67.7158	-0.447855	0.28734	-1.55862	0.119086	0.405587	48	87	76	57	73	No Change
Gm13347	12.7846	0.181811	0.609736	0.298179	0.765566	NA	14	12	7	14	18	No Change
Etl4	2463.92	-0.0213393	0.111416	-0.191528	0.848112	0.954789	2030	2412	2373	2613	3039	No Change
Gm13363	70.1411	-0.318687	0.274739	-1.15996	0.246064	0.58538	58	72	80	57	87	No Change
Gm13360	24.057	0.894369	0.451779	1.97966	0.047742	0.24814	17	19	13	39	37	No Change
Gm13328	192.272	-0.0774725	0.180038	-0.430312	0.666969	0.877695	152	207	183	195	238	No Change
Gm27446	19.3992	0.0182298	0.51816	0.0351819	0.971935	0.991362	12	21	21	12	36	No Change
Gm13362	2.52662	-0.790148	1.40013	-0.564338	0.572524	NA	5	2	1	2	2	No Change
Arhgap21	1149.35	-0.150858	0.116079	-1.29961	0.193733	0.52323	971	1223	1103	1146	1353	No Change
Gm13380	17.3686	-0.240234	0.543884	-0.441702	0.658705	0.874457	13	21	17	22	13	No Change
Gm13375	20.5683	-0.0516881	0.47492	-0.108835	0.913333	0.973982	20	19	18	20	27	No Change
Thnsl1	67.6733	-0.0379409	0.31081	-0.122071	0.902843	0.970529	40	86	66	51	110	No Change
Gm13378	65.4298	-0.06422	0.278131	-0.230899	0.817394	0.943089	58	69	56	67	81	No Change
Gm13379	6.89716	-0.820407	0.828609	-0.990101	0.322125	NA	6	8	9	5	6	No Change
Gm13337	13.2823	0.697511	0.598166	1.16608	0.243581	NA	12	11	6	18	22	No Change
Gm13342	4.19434	0.847943	1.05125	0.806604	0.419895	NA	1	4	4	4	10	No Change
Gm13341	6164.34	-0.371273	0.133476	-2.78158	0.00540952	0.0701341	4646	7121	7032	4783	7637	No Change
Gm13340	25070.2	-0.276635	0.134982	-2.04943	0.0404199	0.226471	18177	27782	28752	20779	31775	No Change
Gm13339	2744.34	-0.762823	0.38889	-1.96154	0.0498161	0.254642	1737	3303	4108	1918	2614	No Change
Pdss1	112.932	-0.425878	0.227308	-1.87357	0.0609893	0.284943	93	139	117	84	138	No Change
Gm25544	2.37751	0.820577	1.38293	0.59336	0.55294	NA	1	2	2	5	2	No Change
Abi1	380.585	-0.446328	0.142832	-3.12484	0.00177901	0.0330426	339	434	401	317	413	Down
Gm13357	6.54628	-0.535703	0.871894	-0.614413	0.538943	NA	8	3	9	5	7	No Change
Acbd5	149.329	-0.147482	0.221267	-0.666533	0.50507	0.791877	102	166	164	119	216	No Change
Mastl	413.493	-0.266294	0.159638	-1.66811	0.0952933	0.362062	328	416	477	392	463	No Change
Yme1l1	1177.38	-0.257064	0.139955	-1.83675	0.0662464	0.297667	857	1297	1336	1054	1412	No Change
Gm13423	9.91049	-0.168594	0.692746	-0.24337	0.807719	NA	5	11	13	8	14	No Change
Gm13422	82.4944	-0.131995	0.262402	-0.503025	0.614947	0.853805	72	77	86	65	121	No Change
Spopl	184.451	-0.328545	0.194415	-1.68991	0.0910447	0.353677	150	209	197	137	244	No Change
Gm13331	117.976	0.111249	0.226226	0.491761	0.622888	0.858383	106	123	85	129	158	No Change
Gm13392	7.19692	0.12089	0.801011	0.150921	0.880038	NA	5	6	8	10	7	No Change
Gm13410	144.875	-0.128575	0.217476	-0.591214	0.554377	0.818855	104	178	136	119	208	No Change
Il1f9	2.21796	0.461239	1.50137	0.307211	0.758683	NA	4	1	0	3	3	No Change
Psd4	106.808	0.535609	0.23724	2.25766	0.0239667	0.169294	58	96	97	136	170	No Change
Pax8	4.64591	-0.512921	1.03949	-0.493437	0.621704	NA	6	3	5	6	2	No Change
Gm13416	56.5543	-0.187213	0.29786	-0.628527	0.529659	0.804869	50	56	57	56	65	No Change
Cacna1b	120.826	-0.113791	0.213889	-0.53201	0.594719	0.842185	108	118	116	112	158	No Change
Ehmt1	872.502	-0.116305	0.117667	-0.988422	0.322946	0.665385	710	954	823	807	1144	No Change
Gm38147	50.2155	-0.680867	0.327264	-2.08049	0.037481	0.21624	43	54	66	34	53	No Change
Gm37139	82.4743	-0.389719	0.254848	-1.52922	0.12621	0.417851	66	95	91	69	94	No Change
Arrdc1	59.647	0.326198	0.288623	1.13018	0.258399	0.599646	48	57	44	67	92	No Change
Zmynd19	497.794	-0.0308432	0.135429	-0.227745	0.819845	0.943929	434	522	426	473	682	No Change
Dph7	83.63	0.256946	0.2485	1.03399	0.30114	0.646013	63	84	67	96	120	No Change
Mrpl41	41.1075	0.642922	0.34563	1.86015	0.0628648	0.289013	32	31	29	47	77	No Change
Pnpla7	210.018	0.109193	0.192168	0.568216	0.569888	0.8274	198	205	154	236	272	No Change
Gm13370	251.711	0.280744	0.178987	1.56852	0.11676	0.401364	223	237	175	291	364	No Change
Gm13369	4.56534	-0.207983	1.00706	-0.206525	0.836381	NA	6	3	4	3	7	No Change
Nsmf	39.1152	-0.274926	0.360325	-0.762994	0.445467	0.756179	29	47	41	29	54	No Change
Nrarp	26.7611	-0.601005	0.426474	-1.40924	0.158764	0.472425	23	36	27	20	28	No Change
Tor4a	30.9548	-0.289207	0.391535	-0.73865	0.46012	0.76516	26	33	33	27	37	No Change
Nelfb	290.013	0.160594	0.157597	1.01901	0.308197	0.653109	243	289	230	306	419	No Change
Stpg3	2.04604	0.971625	1.47549	0.658511	0.51021	NA	2	1	1	2	5	No Change
Tubb4b	1214.29	0.0381273	0.110302	0.345662	0.729597	0.906541	1027	1186	1088	1250	1629	No Change
Slc34a3	2.96585	-0.0440485	1.31743	-0.0334353	0.973327	NA	3	0	5	2	5	No Change
Rnf224	2.87406	0.00568478	1.27014	0.00447572	0.996429	NA	1	2	5	2	5	No Change
Rnf208	31.9614	-0.285842	0.411979	-0.693828	0.48779	0.78166	40	29	24	31	34	No Change
Ndor1	357.325	-0.228615	0.154362	-1.48103	0.138598	0.438488	333	349	357	347	403	No Change
Tmem203	12.6803	0.699914	0.596454	1.17346	0.240612	NA	8	10	10	15	24	No Change
Tprn	149.036	0.203229	0.197464	1.0292	0.303386	0.648132	107	155	127	158	222	No Change
Ssna1	60.9398	0.146877	0.283835	0.517474	0.604826	0.84885	47	60	54	66	85	No Change
Anapc2	408.544	0.221261	0.151714	1.45841	0.144728	0.449671	347	405	301	460	580	No Change
Grin1	18.1543	1.50699	0.585259	2.57491	0.0100266	0.101145	3	20	7	24	48	No Change
Man1b1	450.433	0.0694502	0.137862	0.503765	0.614427	0.853551	358	477	385	446	644	No Change
Gm25220	2.46997	0.949463	1.41635	0.670362	0.502627	NA	0	1	4	4	4	No Change
Dpp7	138.198	-0.0947731	0.209778	-0.451777	0.65143	0.871497	124	143	122	148	158	No Change
Uap1l1	150.122	-0.0104355	0.22539	-0.0462998	0.963071	0.988517	135	182	99	152	197	No Change
Sapcd2	129.567	0.0190765	0.213065	0.0895335	0.928658	0.97936	117	135	102	135	169	No Change
Entpd2	9.92403	-0.112155	0.694404	-0.161512	0.87169	NA	11	9	8	6	17	No Change
Npdc1	65.6594	0.259035	0.284006	0.912075	0.361729	0.695113	59	63	45	70	101	No Change
Abca2	337.048	0.103602	0.161264	0.642436	0.52059	0.800091	299	345	255	368	449	No Change
Paxx	4.34755	0.0420589	1.14365	0.0367761	0.970664	NA	8	0	3	5	5	No Change
C8g	4.91369	-1.62374	1.07051	-1.51679	0.129321	NA	4	11	4	3	2	No Change
Fbxw5	100.163	0.304173	0.235323	1.29258	0.196158	0.526234	87	91	73	110	155	No Change
Traf2	82.4933	-0.122532	0.261847	-0.46795	0.63982	0.867731	83	84	66	85	96	No Change
Edf1	251.464	0.123919	0.163175	0.759425	0.447598	0.757966	212	235	219	272	344	No Change
Mamdc4	22.0237	-0.400387	0.46888	-0.853922	0.393148	0.718759	16	28	24	16	28	No Change
Phpt1	48.8604	0.279707	0.313382	0.892545	0.372101	0.702137	36	45	43	54	74	No Change
Ajm1	14.2057	-0.763884	0.58638	-1.30271	0.192673	NA	13	20	14	12	11	No Change
Rabl6	426.654	0.0647043	0.151509	0.427067	0.669331	0.878605	342	483	334	449	573	No Change
Tmem141	8.55965	-0.487886	0.772669	-0.63143	0.527759	NA	9	4	13	7	9	No Change
Bmyc	22.4744	0.399668	0.463511	0.862262	0.388543	0.714916	22	16	16	27	34	No Change
Kcnt1	8.22948	-0.914337	0.801522	-1.14075	0.253974	NA	5	10	13	8	4	No Change
Camsap1	611.963	-0.173361	0.124627	-1.39104	0.164212	0.480742	533	657	575	573	755	No Change
Gm13542	3.99777	-0.273052	1.09763	-0.248766	0.803542	NA	3	4	5	1	8	No Change
Ubac1	264.265	0.222905	0.162574	1.3711	0.170344	0.49057	206	268	209	300	373	No Change
Nacc2	79.0834	0.0274746	0.261565	0.105039	0.916345	0.974537	72	83	61	73	116	No Change
Tmem250-ps	148.362	-0.289702	0.225122	-1.28686	0.198142	0.529003	163	162	112	140	163	No Change
Qsox2	213.642	0.30095	0.174067	1.72893	0.0838212	0.339181	145	209	187	234	332	No Change
Ccdc187	46.6829	-0.308964	0.353021	-0.875202	0.381464	0.710196	34	45	60	50	43	No Change
Gpsm1	87.4501	-0.500553	0.253885	-1.97158	0.0486579	0.251338	95	97	79	72	91	No Change
Dnlz	66.2104	-0.453291	0.286886	-1.58004	0.114098	0.397349	68	81	55	57	69	No Change
Card9	4.43542	0.0152175	1.00648	0.0151195	0.987937	NA	4	4	4	6	4	No Change
Snapc4	376.266	0.190288	0.143272	1.32816	0.184125	0.511193	304	340	334	400	552	No Change
Gm13563	13.3921	-0.252651	0.600802	-0.420523	0.674103	NA	13	14	12	16	11	No Change
Entr1	389.78	0.0592312	0.14459	0.40965	0.682063	0.88535	292	393	373	411	520	No Change
Pmpca	834.404	0.0168887	0.117035	0.144305	0.88526	0.965488	661	869	762	827	1143	No Change
Inpp5e	98.9383	-0.404397	0.250178	-1.61644	0.105999	0.382057	109	93	96	91	100	No Change
Sec16a	1806.9	0.0137791	0.111609	0.123459	0.901744	0.969967	1579	1781	1581	1903	2317	No Change
0610009E02Rik	4.14252	0.120699	1.04068	0.115981	0.907668	NA	4	5	2	5	5	No Change
Notch1	819.681	0.306964	0.123284	2.4899	0.0127779	0.116174	655	766	638	880	1301	No Change
Egfl7	77.3325	0.272135	0.258872	1.05123	0.293151	0.638453	61	65	70	81	122	No Change
Agpat2	117.898	0.0867127	0.220435	0.393371	0.694045	0.890606	89	133	97	116	172	No Change
Dipk1b	17.6711	-0.324872	0.521577	-0.622865	0.533373	0.807977	14	21	18	19	16	No Change
Snora43	31.2784	-0.0311798	0.390688	-0.0798076	0.93639	0.981474	28	34	25	28	45	No Change
Snora17	61.733	0.314799	0.305278	1.03119	0.302452	0.64727	35	64	58	57	111	No Change
Snhg7os	2.57864	-1.47766	1.43783	-1.02771	0.304088	NA	1	6	3	1	2	No Change
Gm13359	61.8106	-0.172435	0.289019	-0.596621	0.55076	0.817047	61	58	58	54	81	No Change
Surf6	377.228	0.136494	0.151587	0.900438	0.367887	0.699096	269	360	372	412	517	No Change
Med22	168.295	-0.375058	0.204385	-1.83505	0.0664983	0.298284	152	156	199	149	183	No Change
Rpl7a	545.81	0.219078	0.134058	1.6342	0.102216	0.375802	425	556	432	614	775	No Change
Gm23969	26.0188	0.412459	0.44201	0.933145	0.350745	0.687604	27	17	18	31	40	No Change
Gm22879	12.093	-0.19842	0.624511	-0.317721	0.750697	NA	9	10	16	11	15	No Change
Gm24134	17.3075	-0.13288	0.560964	-0.236878	0.812751	0.941972	21	21	7	17	21	No Change
Surf1	81.2459	-0.203003	0.27474	-0.738892	0.459972	0.76516	87	91	57	71	104	No Change
Surf2	144.511	0.0306251	0.20846	0.146911	0.883202	0.963979	136	141	115	156	183	No Change
Surf4	542.851	-0.167226	0.13532	-1.23577	0.216542	0.548688	443	565	556	533	641	No Change
Rexo4	186.312	0.146038	0.193733	0.753809	0.450964	0.759676	122	183	190	188	278	No Change
Cacfd1	71.286	-0.0916925	0.27279	-0.336129	0.736774	0.909662	62	84	56	67	94	No Change
Slc2a6	4.66599	-0.401891	1.06633	-0.376892	0.706254	NA	1	11	3	5	4	No Change
Fam163b	8.93294	1.05234	0.732863	1.43593	0.151022	NA	5	5	7	17	12	No Change
Vav2	224.39	0.0710612	0.167947	0.423118	0.672209	0.880553	188	224	193	232	308	No Change
Brd3os	7.3127	0.81816	0.812432	1.00705	0.313911	NA	6	3	6	13	9	No Change
Brd3	995.297	-0.0610041	0.117749	-0.518084	0.604399	0.848636	788	1038	966	1008	1249	No Change
Wdr5	1251.51	0.107241	0.108185	0.991273	0.321552	0.663686	1022	1224	1094	1308	1750	No Change
Gm25541	13.532	0.0660317	0.602389	0.109616	0.912714	NA	13	12	11	19	12	No Change
Gm13421	8.60717	-0.442598	0.75066	-0.589612	0.555451	NA	11	9	6	9	7	No Change
Rxra	110.866	-0.394494	0.223231	-1.7672	0.077195	0.323987	93	130	116	91	128	No Change
Col5a1	208.784	-0.348757	0.192271	-1.81389	0.069695	0.306053	192	258	180	202	211	No Change
Olfm1	41.7021	0.272362	0.360933	0.754607	0.450485	0.759645	25	54	29	44	66	No Change
Ppp1r26	72.2963	0.435538	0.270046	1.61283	0.106782	0.383207	50	63	62	74	130	No Change
1700007K13Rik	32.8173	0.127796	0.379882	0.33641	0.736562	0.909662	25	29	33	34	47	No Change
Mrps2	433.226	-0.0355839	0.143938	-0.247217	0.80474	0.938767	327	480	405	405	601	No Change
Rpsa-ps9	791.308	0.208258	0.135278	1.53948	0.123688	0.413449	673	772	601	916	1078	No Change
Gbgt1	12.9058	0.240958	0.628558	0.383351	0.701459	NA	4	17	13	16	17	No Change
Gm10134	13.054	1.01645	0.629983	1.61345	0.106646	NA	8	5	12	24	18	No Change
Ralgds	282.668	0.18847	0.166231	1.13379	0.256883	0.597046	223	306	211	305	409	No Change
Gtf3c5	176.984	-0.124341	0.197618	-0.6292	0.529218	0.804739	178	165	156	178	211	No Change
Tsc1	426.103	0.538093	0.14035	3.83395	0.000126102	0.00485026	318	369	305	518	709	Up
Ak8	2.09901	1.01887	1.45404	0.700716	0.48348	NA	2	1	1	3	4	No Change
Gtf3c4	640.068	0.0086719	0.123192	0.0703936	0.94388	0.983069	512	650	598	638	866	No Change
Ddx31	174.321	-0.21081	0.184837	-1.14051	0.254072	0.593898	146	194	169	155	219	No Change
Cfap77	9.80344	-0.871111	0.705988	-1.23389	0.217244	NA	10	14	9	8	7	No Change
Gm13394	437.189	0.390463	0.155083	2.51776	0.0118104	0.110629	355	422	293	494	703	No Change
Ttf1	266.012	0.210193	0.171386	1.22643	0.220036	0.553102	205	272	213	323	344	No Change
Setx	4986.03	0.264377	0.123652	2.13807	0.0325109	0.199341	3270	4839	4674	5143	7962	No Change
Med27	54.2235	0.616935	0.299499	2.05989	0.0394089	0.222369	38	45	40	66	95	No Change
Rapgef1	1001.07	0.0827559	0.112819	0.733528	0.463236	0.766867	830	965	893	1032	1391	No Change
Gm9823	2.27501	0.599447	1.44477	0.414909	0.678209	NA	2	1	2	5	1	No Change
Gm13420	3.20578	0.288156	1.18738	0.242682	0.808252	NA	2	2	4	5	3	No Change
Trub2	372.223	-0.060171	0.14268	-0.421721	0.673229	0.88128	305	378	359	366	482	No Change
Coq4	44.1806	0.290213	0.346889	0.836617	0.402808	0.724968	45	33	32	48	68	No Change
Slc27a4	133.108	-0.151006	0.208673	-0.723649	0.469281	0.770546	117	128	135	131	159	No Change
Urm1	138.71	-0.00671339	0.212605	-0.0315769	0.974809	0.992481	111	124	147	126	201	No Change
Cercam	125.068	0.0234756	0.214968	0.109205	0.91304	0.973942	97	143	104	129	166	No Change
Odf2	2059.63	0.312132	0.108554	2.87537	0.00403552	0.0579174	1652	1798	1700	2390	3042	No Change
Gle1	297.677	0.199241	0.163462	1.21888	0.22289	0.556345	247	307	220	331	421	No Change
Sptan1	5436.8	-0.0636775	0.104673	-0.608346	0.542958	0.81323	4674	5288	5227	5569	6713	No Change
Wdr34	140.608	0.639512	0.210167	3.04288	0.00234327	0.0400841	97	116	104	153	274	Up
Set	4198.6	-0.334938	0.119195	-2.81	0.0049542	0.0659226	3359	4536	4746	3743	4706	No Change
Pkn3	147.348	0.516161	0.19849	2.60043	0.00931058	0.0962559	97	134	116	189	229	No Change
Zdhhc12	131.804	-0.108157	0.217518	-0.497231	0.619026	0.856174	126	113	131	129	164	No Change
Zer1	237.691	0.269326	0.180272	1.49399	0.135177	0.433254	204	236	164	255	367	No Change
Tbc1d13	1114.48	0.00345081	0.125786	0.0274339	0.978114	0.992914	1012	1128	915	1165	1428	No Change
Slc39a1-ps	32.8501	-0.229158	0.397485	-0.57652	0.564264	0.823223	24	33	39	36	32	No Change
Endog	43.2473	-0.0226022	0.338465	-0.0667787	0.946758	0.984022	39	48	33	40	61	No Change
Spout1	252.693	0.202765	0.169386	1.19706	0.231285	0.56641	223	227	202	283	355	No Change
Kyat1	47.691	0.467325	0.336992	1.38676	0.165516	0.483098	34	54	27	54	81	No Change
Lrrc8a	134.097	-0.120283	0.21968	-0.547538	0.584009	0.836285	106	148	128	149	143	No Change
Dolk	24.3368	-0.561295	0.447147	-1.25528	0.209377	0.539497	25	29	23	16	29	No Change
Nup188	1726.56	0.199185	0.109882	1.81272	0.0698752	0.306255	1355	1757	1385	1877	2498	No Change
Sh3glb2	98.0734	0.132075	0.234388	0.563489	0.573102	0.828969	77	101	83	94	151	No Change
Miga2	114.117	0.0245244	0.228189	0.107474	0.914413	0.974312	103	109	98	130	135	No Change
Dolpp1	126.465	0.281646	0.218459	1.28924	0.197315	0.527892	97	99	123	137	195	No Change
Crat	93.0329	0.270145	0.241517	1.11854	0.263338	0.605756	72	86	78	115	124	No Change
Ptpa	702.884	-0.0733366	0.143454	-0.511221	0.609196	0.851412	625	754	593	763	804	No Change
Ier5l	44.3776	-0.422241	0.349917	-1.20669	0.227552	0.562791	29	61	48	39	47	No Change
1700001O22Rik	7.04881	1.17603	0.808421	1.45473	0.145745	NA	4	6	3	10	15	No Change
Ntmt1	111.775	-0.155649	0.266435	-0.584192	0.559091	0.821091	116	128	75	126	112	No Change
Asb6	110.028	-0.113207	0.227557	-0.497488	0.618845	0.856002	95	107	109	116	126	No Change
Prrx2	7.78416	-0.186422	0.781287	-0.238609	0.811409	NA	10	5	7	6	11	No Change
Ptges	13.1154	-0.255766	0.616846	-0.414635	0.678409	NA	13	19	7	10	18	No Change
Tor1b	238.462	-0.419102	0.171866	-2.43854	0.0147469	0.125847	202	257	272	195	270	No Change
Tor1a	104.439	0.0903153	0.230315	0.392138	0.694957	0.890967	95	97	87	102	153	No Change
BC005624	67.3542	0.0749898	0.280548	0.267297	0.78924	0.932543	62	61	57	77	83	No Change
Usp20	53.4025	-0.446906	0.320849	-1.39289	0.163654	0.480034	62	58	43	45	57	No Change
Fnbp1	939.462	0.00382072	0.125987	0.0303264	0.975807	0.992638	778	1001	808	1016	1160	No Change
D330023K18Rik	3.49643	1.39437	1.16764	1.19418	0.232407	NA	1	4	1	6	7	No Change
Gpr107	327.156	-0.104687	0.151907	-0.689153	0.490727	0.784089	290	351	285	323	406	No Change
Gm22516	6.58397	0.409771	0.817198	0.501435	0.616065	NA	5	6	5	8	10	No Change
Ncs1	77.5116	-0.142036	0.262833	-0.540403	0.588919	0.838956	72	71	77	78	91	No Change
Hmcn2	29.9996	0.809888	0.400941	2.01997	0.0433869	0.235604	16	28	20	43	51	No Change
Ass1	413.283	0.28138	0.150709	1.86704	0.0618965	0.287284	354	388	302	456	627	No Change
Fubp3	914.879	-0.102487	0.121527	-0.843327	0.399046	0.721969	765	891	929	897	1145	No Change
Mir6998	2.17913	-0.151838	1.51712	-0.100083	0.920278	NA	3	0	3	1	4	No Change
Exosc2	380.75	-0.129445	0.154473	-0.837978	0.402043	0.724486	372	389	319	355	489	No Change
Abl1	775.138	0.20241	0.126688	1.59771	0.110109	0.389635	641	695	668	888	1063	No Change
Lamc3	2.71406	1.59967	1.36727	1.16998	0.242011	NA	2	0	2	3	8	No Change
Aif1l	168.949	0.370327	0.201863	1.83454	0.0665735	0.298284	134	137	144	166	300	No Change
Nup214	1305.56	0.0762237	0.11021	0.691625	0.489173	0.783049	1047	1238	1229	1336	1818	No Change
Gm13608	28.2276	0.199506	0.432846	0.460918	0.644858	0.870173	17	39	19	27	46	No Change
Fam78a	59.1056	0.603809	0.307868	1.96126	0.0498485	0.254721	46	54	35	61	117	No Change
Plpp7	8.83642	0.440101	0.762532	0.577158	0.563833	NA	10	9	2	12	12	No Change
Prrc2b	4460.88	0.183714	0.0996644	1.84332	0.0652819	0.294907	3537	4399	3719	4956	6230	No Change
Gm27805	7.48007	0.659616	0.79084	0.83407	0.404241	NA	5	9	3	8	15	No Change
Gm22192	3.21701	1.11297	1.23459	0.901487	0.36733	NA	3	3	0	5	6	No Change
Gm25632	4.56782	-0.29092	1.04607	-0.278108	0.78093	NA	2	9	3	6	3	No Change
Gm13610	2.75283	-0.59416	1.29956	-0.457202	0.647526	NA	1	4	4	2	3	No Change
Pomt1	186.476	0.424689	0.190005	2.23515	0.0254077	0.174956	158	157	134	208	310	No Change
Uck1	76.151	-0.234692	0.269979	-0.869296	0.384685	0.712528	79	76	66	75	84	No Change
Gm13611	228.7	0.230019	0.171128	1.34413	0.178906	0.503077	185	221	182	266	316	No Change
Swi5	313.214	0.0375889	0.152909	0.245826	0.805817	0.9393	269	321	263	308	439	No Change
Golga2	288.077	0.113169	0.162946	0.694518	0.487358	0.781381	241	282	245	268	448	No Change
Dnm1	106.659	0.967008	0.243088	3.97802	6.94924e-05	0.00316284	71	88	54	135	223	Up
Ciz1	113.673	0.0788745	0.222535	0.354436	0.723012	0.903685	99	119	88	116	159	No Change
1110008P14Rik	46.717	0.0675071	0.342729	0.196969	0.843851	0.952727	51	37	36	51	60	No Change
Ptges2	70.5469	0.31069	0.304691	1.01969	0.307877	0.652795	48	85	47	61	132	No Change
Gm13413	30.1229	0.203155	0.399348	0.508717	0.610951	0.85261	21	33	25	28	50	No Change
Slc25a25	124.096	-0.152415	0.23805	-0.640266	0.522	0.801076	134	113	104	131	136	No Change
Naif1	55.5997	-0.105677	0.319871	-0.330374	0.741117	0.911096	41	77	42	49	77	No Change
Fam102a	105.683	0.199765	0.229708	0.869644	0.384495	0.712396	95	95	83	113	155	No Change
Dpm2	77.4896	-0.251093	0.279452	-0.898522	0.368908	0.699585	65	79	83	86	72	No Change
Pip5kl1	13.1426	-0.199716	0.622954	-0.320596	0.748517	NA	18	8	11	12	16	No Change
St6galnac4	48.5319	0.237982	0.317359	0.749883	0.453325	0.761169	39	41	44	56	68	No Change
St6galnac6	104.299	0.35541	0.25642	1.38605	0.165733	0.483419	100	87	69	101	185	No Change
Ak1	317.586	0.232081	0.153383	1.51308	0.13026	0.425111	254	276	284	358	454	No Change
Eng	278.859	0.0733372	0.179439	0.408703	0.682758	0.885563	268	223	252	284	388	No Change
Fpgs	286.605	0.00573445	0.15916	0.0360296	0.971259	0.990955	249	302	237	277	398	No Change
Cdk9	356.561	0.108409	0.149476	0.725261	0.468292	0.770471	309	336	304	351	527	No Change
Sh2d3c	59.135	0.189776	0.294485	0.644434	0.519294	0.799433	55	53	45	64	85	No Change
Ttc16	4.99044	0.384679	0.967491	0.397605	0.690922	NA	5	2	5	4	10	No Change
Tor2a	143.052	-0.0156104	0.200211	-0.07797	0.937852	0.981911	115	154	128	134	201	No Change
Ptrh1	23.4974	-0.403636	0.480403	-0.840203	0.400794	0.723428	25	34	13	20	26	No Change
Stxbp1	141.315	0.596219	0.208944	2.85348	0.00432427	0.0603486	114	111	96	168	249	No Change
Fam129b	407.714	-0.066104	0.142078	-0.465264	0.641742	0.868496	362	429	351	391	538	No Change
Lrsam1	184.811	-0.163457	0.186213	-0.877798	0.380053	0.70861	156	198	179	153	256	No Change
Rpl12	465.622	0.0846299	0.174095	0.486114	0.626887	0.860762	474	434	331	477	651	No Change
Snora65	39.8392	0.160801	0.368387	0.436499	0.662474	0.876328	35	29	40	33	69	No Change
Slc2a8	77.23	0.573495	0.266881	2.14888	0.031644	0.196717	64	63	50	88	139	No Change
Garnl3	123.928	0.132996	0.222909	0.596639	0.550748	0.817047	119	114	93	129	177	No Change
Gm38299	21.0685	-0.44425	0.509092	-0.872631	0.382864	0.711375	26	17	21	11	31	No Change
Ralgps1	167.453	0.277977	0.196941	1.41147	0.158107	0.471427	117	172	139	165	280	No Change
Angptl2	5.33631	-0.324251	0.930647	-0.348415	0.727529	NA	6	7	3	4	7	No Change
Gm13537	2.88411	0.0707767	1.24054	0.0570532	0.954503	NA	1	4	3	3	4	No Change
Zbtb34	396.45	-0.0239592	0.142756	-0.167833	0.866715	0.959597	311	401	388	403	512	No Change
Zbtb43	339.7	0.112107	0.14823	0.756303	0.449468	0.758713	264	342	301	372	455	No Change
Lmx1b	24.1951	-1.03186	0.494688	-2.08587	0.0369902	0.214305	21	21	41	18	16	No Change
C130021I20Rik	5.89539	-1.01605	0.93687	-1.08452	0.278135	NA	7	7	6	6	2	No Change
Gm13529	8.30352	0.116847	0.733751	0.159246	0.873475	NA	7	8	7	10	10	No Change
Mvb12b	80.4076	0.065182	0.286122	0.227812	0.819793	0.943929	82	86	48	89	102	No Change
Gm13404	3.09897	2.03675	1.31282	1.55144	0.120797	NA	0	3	1	4	10	No Change
Pbx3	91.7659	-0.581845	0.25282	-2.30142	0.0213677	0.158439	91	105	94	83	79	No Change
Mapkap1	247.644	0.1712	0.164166	1.04285	0.29702	0.642081	205	223	219	257	366	No Change
Gm13408	704.2	0.23997	0.134423	1.78519	0.0742307	0.316823	594	686	525	749	1073	No Change
Gm13414	168.447	0.15691	0.188021	0.834534	0.40398	0.726004	125	175	145	184	235	No Change
Gapvd1	847.892	-0.158724	0.119328	-1.33014	0.183471	0.510312	683	924	837	775	1085	No Change
Hspa5	2418.61	-0.171717	0.101315	-1.69488	0.0900981	0.351774	2152	2542	2269	2281	2965	No Change
Rabepk	91.6445	0.104826	0.251645	0.416564	0.676998	0.882203	67	99	81	79	150	No Change
Fbxw2	292.097	0.0367923	0.155111	0.2372	0.812502	0.941962	242	276	276	301	391	No Change
Gm34653	2.52772	-0.699697	1.412	-0.495536	0.620222	NA	2	1	5	3	1	No Change
Psmd5	356.248	-0.0316716	0.144262	-0.219543	0.826227	0.946968	300	372	318	346	478	No Change
Cutal	7.79255	-1.36868	0.849086	-1.61195	0.106974	NA	6	16	7	6	3	No Change
Phf19	286.034	0.618168	0.154916	3.99033	6.5981e-05	0.00304881	189	234	226	355	493	Up
Traf1	14.6272	0.304255	0.560823	0.542515	0.587463	NA	9	15	13	19	19	No Change
Gm13450	3.84186	1.27497	1.12199	1.13635	0.255812	NA	1	5	1	6	8	No Change
AI182371	2.85559	0.0170473	1.24217	0.0137238	0.98905	NA	2	4	2	2	5	No Change
Cntrl	720.95	0.32829	0.122595	2.67785	0.00740968	0.0843735	550	660	589	856	1053	No Change
Rab14	491.002	-0.0890587	0.141864	-0.627774	0.530152	0.805262	366	560	469	464	646	No Change
Gsn	53.6696	0.152116	0.315038	0.482848	0.629203	0.861823	43	62	37	63	69	No Change
Gm43128	3.28114	-0.237345	1.21061	-0.196053	0.844568	NA	2	7	1	3	4	No Change
Stom	39.511	0.605718	0.3555	1.70385	0.0884096	0.348578	31	35	24	44	74	No Change
Glo1-ps	224.436	-0.0506099	0.175994	-0.287567	0.773679	0.92541	204	242	180	219	295	No Change
Ggta1	220.389	0.156515	0.181612	0.861807	0.388794	0.715116	162	248	174	248	298	No Change
Gm43761	9.06556	-0.542058	0.721822	-0.750959	0.452677	NA	6	12	11	6	11	No Change
Dab2ip	424.224	-0.0156014	0.13878	-0.112418	0.910492	0.97301	370	421	379	429	554	No Change
Ndufa8	141.271	0.453917	0.204286	2.22197	0.0262855	0.177575	107	126	105	182	208	No Change
Lhx6	13.4599	0.012443	0.597083	0.0208397	0.983374	NA	12	17	8	16	15	No Change
Rbm18	153.267	-0.05941	0.202378	-0.29356	0.769094	0.924216	118	145	166	145	206	No Change
Mrrf	62.7019	0.0517869	0.287009	0.180437	0.85681	0.95617	56	62	52	56	96	No Change
Ptgs1	7.86584	-1.06793	0.797269	-1.33949	0.180412	NA	9	7	11	5	6	No Change
Gm13430	56.3449	0.0653201	0.31171	0.209554	0.834016	0.949325	58	51	42	51	86	No Change
Gm13436	1118.55	0.244065	0.138326	1.76442	0.0776611	0.324717	980	1091	788	1218	1672	No Change
Gm13435	17.5522	0.0709358	0.519767	0.136476	0.891445	0.967306	10	19	19	16	27	No Change
Pdcl	234.801	0.00419707	0.176892	0.0237267	0.981071	0.993359	172	232	244	217	339	No Change
Rc3h2	817.185	-0.552816	0.145865	-3.78991	0.000150704	0.00563968	656	922	1011	609	894	Down
Zbtb6	144.953	-0.515521	0.212593	-2.42492	0.0153117	0.127789	120	159	175	125	142	No Change
Zbtb26	126.368	-0.515564	0.228753	-2.2538	0.0242085	0.170331	96	163	141	88	151	No Change
Rabgap1	669.198	-0.143366	0.130059	-1.10231	0.270325	0.613881	534	723	665	584	904	No Change
Strbp	1135.43	-0.194402	0.116723	-1.6655	0.0958128	0.362944	935	1184	1177	1003	1455	No Change
Gm17893	15.5748	-1.21728	0.657634	-1.85099	0.0641704	NA	10	23	24	2	20	No Change
Gpr21	62.4764	-0.418105	0.286992	-1.45685	0.145157	0.450451	51	71	70	51	71	No Change
Mir5128	2.396	-1.44376	1.49795	-0.963824	0.335134	NA	2	3	4	0	3	No Change
Crb2	12.7841	-1.04181	0.624577	-1.66803	0.09531	NA	15	16	13	9	9	No Change
Dennd1a	120.343	0.245534	0.216561	1.13379	0.256884	0.597046	99	118	91	138	171	No Change
Gm44283	16.9988	-0.00388552	0.529344	-0.00734026	0.994143	0.998227	11	15	21	16	24	No Change
Gm44291	26.2472	-0.381558	0.444534	-0.858331	0.39071	0.717161	15	35	31	23	29	No Change
Lhx2	3.39599	0.360401	1.17957	0.305537	0.759957	NA	5	1	2	4	5	No Change
Gm13588	3.31471	-1.33269	1.27421	-1.04589	0.295611	NA	5	6	1	2	2	No Change
Nek6	165.125	-0.197431	0.199784	-0.988222	0.323044	0.665417	158	189	132	148	208	No Change
Psmb7	716.94	0.143785	0.123522	1.16404	0.244408	0.583345	603	668	617	773	1000	No Change
Gm13586	60.9856	0.189207	0.292968	0.645827	0.518391	0.799098	42	56	61	73	79	No Change
Adgrd2-ps	10.5768	1.14036	0.728863	1.56457	0.117683	NA	6	9	5	6	34	No Change
Nr6a1	788.514	-0.199953	0.117843	-1.69677	0.0897401	0.351177	672	843	776	728	964	No Change
Gm44146	7.13431	-1.88347	0.952804	-1.97677	0.0480678	NA	4	11	13	5	1	No Change
Nr6a1os	2.34212	-3.10652	1.83383	-1.694	0.0902648	NA	3	3	4	0	1	No Change
Gm44144	43.0771	-0.823048	0.382432	-2.15214	0.0313864	0.195437	28	49	68	26	44	No Change
5730507A11Rik	4.17401	0.96118	1.1297	0.850825	0.394867	NA	3	0	5	8	5	No Change
Olfml2a	8.91326	-0.835996	0.743235	-1.12481	0.260671	NA	6	11	13	7	7	No Change
Rpl35	718.038	0.0948105	0.15447	0.613781	0.53936	0.810886	678	730	508	750	994	No Change
Arpc5l	218.001	-0.192177	0.17363	-1.10682	0.268372	0.611424	190	213	227	199	271	No Change
Golga1	123.346	-0.0685854	0.213108	-0.321834	0.747578	0.914209	111	120	114	113	169	No Change
Scai	270.279	-0.18419	0.211627	-0.870352	0.384108	0.712202	177	280	331	206	393	No Change
Gm16523	47.9645	-0.380218	0.320776	-1.18531	0.235896	0.57222	40	55	51	41	54	No Change
Gm44027	66.3868	-0.0833208	0.277945	-0.299774	0.764349	0.923133	49	71	68	61	90	No Change
Ppp6c	272.444	-0.434014	0.202299	-2.14541	0.0319203	0.198029	182	348	319	197	339	No Change
Gm13511	3.30601	-0.933247	1.21228	-0.769828	0.441402	NA	4	2	5	2	3	No Change
Gm13453	80.4791	-0.0918154	0.256492	-0.357966	0.720369	0.902336	69	87	71	85	94	No Change
Gm13456	9300.39	0.230531	0.109937	2.09695	0.0359983	0.211428	7366	9557	7077	10294	13539	No Change
Gm13462	4.82306	-0.110779	0.973823	-0.113756	0.909431	NA	2	6	6	4	7	No Change
Gm13461	941.84	-0.122918	0.116193	-1.05788	0.290112	0.635303	781	967	934	864	1237	No Change
Gm13464	251.98	0.394621	0.169817	2.3238	0.0201364	0.153207	205	232	178	284	407	No Change
Kynu	2.82497	-3.38572	1.7873	-1.89432	0.058182	NA	4	2	6	0	1	No Change
Gtdc1	122.992	-0.205358	0.217016	-0.94628	0.344006	0.682581	95	147	118	116	147	No Change
Gm13477	45.6116	-0.157089	0.341838	-0.459542	0.645845	0.870173	33	41	57	42	58	No Change
Zeb2	52.8683	-0.718291	0.376541	-1.9076	0.0564426	0.272584	56	50	64	56	28	No Change
1700019E08Rik	4.62242	1.02448	1.09203	0.938143	0.348171	NA	2	1	6	2	15	No Change
Acvr2a	146.263	-0.567221	0.227312	-2.49534	0.0125837	0.114891	103	191	174	124	139	No Change
Orc4	250.457	-0.625319	0.181057	-3.4537	0.000552943	0.0143993	210	289	307	169	279	Down
Mbd5	156.958	-0.280696	0.194493	-1.44322	0.148959	0.456592	131	185	151	141	184	No Change
Gm13510	5.49288	-0.437865	0.951695	-0.46009	0.645452	NA	3	4	10	3	8	No Change
Ap2m1-ps	595.155	-0.00721306	0.130202	-0.0553992	0.95582	0.985873	526	571	538	609	773	No Change
Epc2	344.67	-0.432841	0.162552	-2.66279	0.00774949	0.0863151	287	380	393	313	345	No Change
Kif5c	289.389	-0.553383	0.158395	-3.4937	0.000476381	0.0131035	285	332	294	238	287	Down
Gm13525	3.71011	-1.09551	1.15351	-0.949716	0.342256	NA	4	6	3	3	2	No Change
Lypd6b	6.71771	-1.82629	0.926003	-1.97223	0.0485836	NA	7	11	8	4	2	No Change
Lypd6	20.93	-1.15577	0.520764	-2.21937	0.0264615	0.178086	16	22	36	13	15	No Change
Mmadhc	217.29	-0.027125	0.170148	-0.159421	0.873338	0.961477	174	225	205	207	298	No Change
Gm13488	2.63185	-0.902315	1.36172	-0.66263	0.507567	NA	3	5	1	2	2	No Change
Gm13487	167.741	-0.351029	0.219747	-1.59742	0.110171	0.389765	134	155	215	156	177	No Change
Gm13498	214.773	0.305676	0.206303	1.48169	0.138423	0.438439	177	154	203	278	277	No Change
Rnd3	273.273	-0.835189	0.174798	-4.77802	1.7703e-06	0.000198746	277	298	333	205	224	Down
Gm13494	2.05745	1.67005	1.5057	1.10915	0.267365	NA	1	1	1	4	4	No Change
Gm13493	456.042	0.265762	0.1444	1.84046	0.0657001	0.29609	337	450	379	454	750	No Change
Rbm43	24.4375	0.0654586	0.444877	0.147139	0.883023	0.963979	14	29	24	25	34	No Change
Nmi	14.4177	0.126069	0.565735	0.22284	0.82366	NA	14	12	12	13	23	No Change
Tnfaip6	2.81474	-1.21688	1.41368	-0.86079	0.389354	NA	5	4	1	0	4	No Change
Rif1	7456.33	-0.224326	0.119403	-1.87873	0.0602811	0.283411	5731	7874	8256	6541	9380	No Change
Neb	124.928	0.6633	0.227064	2.9212	0.00348689	0.0526368	75	90	114	145	235	No Change
Arl5a	397.231	-0.513145	0.147383	-3.48172	0.000498196	0.0135375	337	462	448	306	437	Down
Cacnb4	6.9296	0.978753	0.871593	1.12295	0.26146	NA	1	4	9	7	17	No Change
Bloc1s2-ps	39.3079	-0.644216	0.385238	-1.67225	0.0944747	0.360669	54	36	34	27	42	No Change
Stam2	253.823	-0.0336369	0.166849	-0.2016	0.840229	0.951109	188	283	239	244	344	No Change
Gm13548	7.26476	0.574783	0.794037	0.723874	0.469143	NA	4	9	4	10	11	No Change
Fmnl2	481.881	-0.821831	0.146127	-5.62409	1.86483e-08	6.4235e-06	470	576	558	366	395	Down
Prpf40a	1301.36	-0.260685	0.130235	-2.00166	0.0453215	0.241714	979	1447	1433	1146	1581	No Change
Arl6ip6	250.67	-0.33781	0.17194	-1.9647	0.0494491	0.253579	197	283	277	205	305	No Change
Gm13503	4.71987	-0.0279222	1.09565	-0.0254847	0.979668	NA	0	11	3	5	6	No Change
Gm13502	88.8685	-0.229436	0.283424	-0.809513	0.41822	0.735586	49	116	100	74	117	No Change
Rprm	16.7741	-0.233946	0.555273	-0.421316	0.673524	0.881362	18	12	18	20	14	No Change
Galnt13	5.68533	-0.640662	0.979876	-0.65382	0.513228	NA	5	6	7	8	1	No Change
Gm13517	115.059	-0.00220112	0.227827	-0.00966136	0.992291	0.997291	93	123	101	132	132	No Change
Nr4a2	6.48419	0.173372	0.827465	0.209522	0.834041	NA	5	7	5	8	8	No Change
A930012O16Rik	4.95026	0.206159	0.950948	0.216793	0.828369	NA	4	6	3	4	9	No Change
Gpd2	653.038	-0.134454	0.123241	-1.09099	0.275279	0.618918	537	699	632	611	834	No Change
Gm13531	5.06052	0.48091	0.935436	0.514102	0.607181	NA	4	5	3	7	7	No Change
Gm13532	132.29	0.513014	0.219396	2.3383	0.0193718	0.149186	91	113	108	133	253	No Change
Gm13534	2.7088	0.600684	1.28431	0.467709	0.639993	NA	3	1	2	3	5	No Change
Gm13545	9.70754	-0.667769	0.714385	-0.934746	0.349919	NA	10	7	14	6	11	No Change
Acvr1	66.2964	-0.138976	0.281724	-0.493307	0.621795	0.857657	48	74	69	57	91	No Change
Pkp4	943.799	-0.0357937	0.122089	-0.293177	0.769387	0.924295	846	978	795	942	1228	No Change
5330411J11Rik	3.88683	0.469998	1.09419	0.42954	0.66753	NA	4	1	4	4	7	No Change
Gm13552	57.5412	0.315709	0.303382	1.04063	0.298047	0.643021	50	42	51	59	95	No Change
Tanc1	1130.64	-0.0143037	0.111618	-0.128149	0.898031	0.968723	907	1171	1052	1151	1469	No Change
Wdsub1	71.5333	0.744574	0.267513	2.78332	0.00538057	0.0698184	44	56	55	100	119	No Change
Baz2b	601.951	0.186118	0.128269	1.451	0.146781	0.453078	470	579	523	606	926	No Change
Gm13574	3.96925	0.0856145	1.0993	0.077881	0.937923	NA	3	7	1	3	7	No Change
Gm13570	3.47952	-0.024778	1.15356	-0.0214795	0.982863	NA	1	6	3	4	4	No Change
Marchf7	771.196	-0.22531	0.154216	-1.461	0.144015	0.448564	548	819	900	668	981	No Change
Cd302	6.84241	-0.969096	0.898993	-1.07798	0.281043	NA	7	12	5	1	10	No Change
Rpl10a-ps4	229.715	0.295354	0.182516	1.61824	0.105611	0.381498	207	206	163	254	351	No Change
Ly75	158.221	0.0508101	0.235594	0.215668	0.829247	0.948084	154	172	103	132	255	No Change
Pla2r1	2.6515	0.127832	1.31233	0.0974085	0.922402	NA	3	2	2	1	6	No Change
Gm13566	2.29466	2.64853	1.61145	1.64357	0.100265	NA	1	1	0	7	3	No Change
Rbms1	532.36	-0.762064	0.130885	-5.82239	5.80132e-09	2.25448e-06	526	631	595	380	497	Down
Tank	68.7704	-0.31411	0.279372	-1.12434	0.260867	0.60318	57	69	79	65	74	No Change
Psmd14	654.662	0.0544535	0.12606	0.431966	0.665766	0.877422	521	640	615	632	946	No Change
Gm25966	3.43295	-0.678667	1.15944	-0.58534	0.558319	NA	4	3	4	2	4	No Change
Tbr1	3.53436	-0.522966	1.26898	-0.412117	0.680254	NA	6	5	0	1	6	No Change
Slc4a10	3.22588	-0.0934722	1.171	-0.0798225	0.936378	NA	3	3	3	4	3	No Change
Dpp4	87.2303	0.364578	0.24776	1.4715	0.141156	0.442931	56	86	75	94	144	No Change
Ifih1	2.79233	-0.459507	1.46474	-0.313712	0.75374	NA	0	3	6	0	6	No Change
Gca	94.7129	0.295607	0.299925	0.985602	0.324328	0.666331	39	103	102	91	164	No Change
Kcnh7	3.62038	-2.66283	1.39533	-1.90838	0.0563418	NA	5	6	4	1	1	No Change
Fign	50.7065	-1.07693	0.335725	-3.20777	0.0013377	0.0271618	56	53	66	35	35	Down
Gm13577	34.9775	0.263845	0.375301	0.703021	0.482043	0.778127	32	26	30	41	49	No Change
Gm13578	28.502	-0.0979693	0.426896	-0.229492	0.818486	0.943556	32	29	19	23	42	No Change
Grb14	11.7981	0.237374	0.641386	0.370095	0.711312	NA	5	16	10	15	15	No Change
Cobll1	44.111	-0.60333	0.338217	-1.78385	0.0744477	0.317214	43	47	50	36	42	No Change
Scn3a	28.9804	-0.825128	0.430165	-1.91817	0.0550897	0.269307	24	47	27	22	24	No Change
Scn2a	7.31111	-0.152046	0.787213	-0.193144	0.846846	NA	7	9	5	7	9	No Change
Csrnp3	105.821	-1.0256	0.23907	-4.28996	1.78703e-05	0.00115252	102	153	113	69	83	Down
Galnt3	42.472	-0.658769	0.350026	-1.88206	0.0598283	0.282566	42	42	52	34	39	No Change
Ttc21b	75.9198	-0.164715	0.27372	-0.601764	0.547332	0.815589	58	95	68	60	109	No Change
Scn9a	2.30516	-0.600433	1.43549	-0.418277	0.675744	NA	4	1	2	2	2	No Change
Gm13602	12.1205	-0.2012	0.613642	-0.327878	0.743004	NA	11	11	13	11	15	No Change
B3galt1	8.3766	-0.638366	0.765986	-0.833392	0.404624	NA	10	12	5	5	10	No Change
Gm13604	12.6901	0.778259	0.630272	1.2348	0.216905	NA	10	12	5	22	16	No Change
Gm37964	11.5718	-1.07297	0.669977	-1.6015	0.109265	NA	10	17	14	4	13	No Change
Gm13607	7.83455	-0.22066	0.794259	-0.277819	0.781151	NA	4	6	13	6	11	No Change
Stk39	84.4881	0.370312	0.273546	1.35375	0.175817	0.498317	75	86	47	93	137	No Change
Gm13597	11.1053	0.434096	0.646943	0.670995	0.502224	NA	8	10	9	9	23	No Change
Gm13612	24.6985	0.214982	0.446981	0.480965	0.630541	0.862654	22	28	14	27	36	No Change
Cers6	330.213	-0.198241	0.156059	-1.27029	0.20398	0.534585	265	357	340	277	441	No Change
Gm37159	30.675	-0.630658	0.422529	-1.49258	0.135547	0.433682	19	40	41	20	35	No Change
Gm38236	14.4245	0.77804	0.580595	1.34007	0.180221	NA	7	9	15	16	30	No Change
Gm37651	14.3426	0.42206	0.578026	0.730174	0.465284	NA	15	9	10	18	21	No Change
Gm37747	19.3509	-0.654497	0.509331	-1.28501	0.198788	0.529961	17	19	26	17	16	No Change
Gm37666	9.70463	-0.224112	0.699286	-0.320487	0.748599	NA	12	9	7	7	14	No Change
Gm38377	25.8651	-0.183438	0.428706	-0.427887	0.668733	0.878285	23	28	24	20	37	No Change
Spc25	313.732	-0.0391972	0.155362	-0.252297	0.800812	0.936876	255	298	319	301	423	No Change
Lrp2	1425.84	-1.05934	0.14161	-7.4807	7.393e-14	1.01862e-10	1693	1632	1589	966	1020	Down
Bbs5	31.2135	-0.195634	0.394967	-0.495317	0.620376	0.857025	31	29	30	25	43	No Change
Klhl41	2.70813	0.401262	1.49376	0.268625	0.788218	NA	6	0	0	4	3	No Change
Fastkd1	207.744	0.135945	0.180807	0.75188	0.452123	0.760644	144	216	194	204	315	No Change
Ppig	834.431	-0.217856	0.156387	-1.39306	0.163602	0.480034	638	812	987	682	1122	No Change
Ccdc173	9.94204	1.22324	0.706718	1.73087	0.0834752	NA	4	9	5	20	14	No Change
Gm13623	100.141	0.320282	0.232089	1.37999	0.167589	0.487053	82	87	81	106	162	No Change
Phospho2	77.281	-0.394512	0.278346	-1.41734	0.156383	0.468777	58	95	85	52	104	No Change
Gm13624	37.8148	-0.0699226	0.356202	-0.196301	0.844375	0.953176	32	40	34	40	45	No Change
Klhl23	52.0348	-0.730354	0.327558	-2.22969	0.0257679	0.176117	41	65	66	31	58	No Change
Ssb	1312.13	-0.0786842	0.128964	-0.610127	0.541778	0.812353	947	1385	1379	1263	1709	No Change
Mettl5	71.0302	-0.0597653	0.278242	-0.214796	0.829926	0.94838	51	90	60	71	91	No Change
Ubr3	1086.59	-0.0489175	0.118682	-0.412174	0.680212	0.884538	884	1064	1083	1006	1503	No Change
Rpl9-ps7	768.264	0.207712	0.123017	1.68849	0.0913177	0.354016	622	760	610	826	1131	No Change
Sp5	5.25179	-1.80267	1.05451	-1.70948	0.0873614	NA	3	12	6	2	3	No Change
Erich2	2.13714	0.565336	1.53417	0.368498	0.712502	NA	2	2	1	0	7	No Change
Gad1	13.0633	0.349453	0.643286	0.543232	0.58697	NA	5	11	17	9	28	No Change
Gorasp2	418.513	0.0288001	0.137699	0.209153	0.834329	0.949414	336	430	379	410	585	No Change
Tlk1	929.557	-0.316574	0.11977	-2.64319	0.00821295	0.0894863	776	1046	964	837	1050	No Change
Mettl8	125.291	-0.0457636	0.215275	-0.212583	0.831653	0.949074	91	144	117	123	165	No Change
Dcaf17	501.717	0.0241282	0.134605	0.179252	0.85774	0.95617	392	545	441	497	692	No Change
Cybrd1	4.35438	-1.51272	1.11384	-1.35811	0.174429	NA	7	5	4	1	4	No Change
Dync1i2	483.35	-0.0711233	0.131717	-0.53997	0.589218	0.839303	400	503	455	467	631	No Change
Slc25a12	328.853	0.141693	0.162408	0.872453	0.382961	0.711381	230	303	338	352	462	No Change
Gm13641	3.45372	-0.359718	1.19508	-0.300999	0.763415	NA	1	8	2	3	4	No Change
Hat1	1410.53	0.183523	0.119726	1.53285	0.125312	0.416406	1048	1414	1235	1373	2231	No Change
Gm13642	21.8922	-0.111827	0.46692	-0.239498	0.810719	0.941277	20	25	17	24	24	No Change
Metap1d	69.8111	-0.229703	0.283933	-0.809004	0.418513	0.735759	64	82	58	74	71	No Change
Platr26	5.06626	1.33589	1.01582	1.31509	0.188481	NA	2	6	1	4	16	No Change
Itga6	1051.48	0.0597483	0.111534	0.535698	0.592167	0.840726	863	1051	932	1091	1425	No Change
Gm13663	5.43738	0.0891079	1.07828	0.0826388	0.934139	NA	0	7	8	10	2	No Change
Gm13662	3.28318	0.314227	1.19346	0.26329	0.792327	NA	3	2	3	6	2	No Change
Pdk1	1328.17	0.217972	0.138714	1.57138	0.116095	0.400258	944	1506	1016	1366	2056	No Change
Rapgef4	84.0883	0.198342	0.249919	0.793623	0.427415	0.743219	65	76	77	98	113	No Change
Map3k20	355.056	-0.0384724	0.147457	-0.260907	0.794165	0.933974	293	362	334	324	501	No Change
Zakit	3.25124	0.370402	1.15862	0.319692	0.749201	NA	3	3	2	3	6	No Change
Rpl36a-ps4	3.2019	-2.46204	1.43509	-1.7156	0.0862354	NA	4	4	5	1	1	No Change
Cdca7	850.287	0.156557	0.117398	1.33355	0.182351	0.50843	656	859	728	921	1194	No Change
Ak3l2-ps	67.7002	1.11663	0.305683	3.65288	0.000259312	0.00833996	40	55	33	76	166	Up
6430710C18Rik	1.72963	2.32778	3.90839	0.595586	0.551452	NA	0	2	0	0	9	No Change
Sp3	941.916	-0.142487	0.144222	-0.987967	0.323169	0.665417	676	968	1063	870	1210	No Change
Gm11084	2.45739	-0.654917	1.49682	-0.437539	0.661721	NA	0	2	6	3	1	No Change
Sp3os	13.8926	0.609012	0.584619	1.04172	0.29754	NA	13	9	9	20	20	No Change
Ola1	660.17	-0.0449733	0.13287	-0.338477	0.735004	0.909086	515	674	656	594	939	No Change
Gm13666	2.75283	-0.59416	1.29956	-0.457202	0.647526	NA	1	4	4	2	3	No Change
Cir1	44.2602	-0.0845608	0.33568	-0.251909	0.801112	0.937003	42	40	42	38	63	No Change
Scrn3	81.1524	0.170209	0.250175	0.680361	0.496276	0.78706	62	78	73	85	119	No Change
Gpr155	10.6979	-0.235983	0.708265	-0.333185	0.738995	NA	8	5	18	8	15	No Change
[truncated: 19,973 more rows]

## Sheet: rescue_RNA_seq_all_genes
Gene_Identifier	baseMean	log2FoldChange	lfcSE	stat	pvalue	padj	rmce_input_aligned.bam	wt20_input_aligned.bam	wt44_input_aligned.bam	dko4_input_aligned.bam	dko13_input_aligned.bam	Reg	fl_1_Aligned_filteredsq30.out.sam	fl_2_Aligned_filteredsq30.out.sam	dd3del_1_Aligned_filteredsq30.out.sam	dd3del_2_Aligned_filteredsq30.out.sam	gfp_1_Aligned_filteredsq30.out.sam	gfp_2_Aligned_filteredsq30.out.sam
Xkr4	10.5036	-2.13996	0.764026	-2.8009	0.00509611	NA	12	17	13	4	4	No Change	9	3	0	1	1	2
Gm37180	4.51712	-5.57051	1.68848	-3.29913	0.000969844	NA	5	9	7	0	0	No Change	4	2	1	0	0	0
Gm37363	3.1044	-1.7815	1.35557	-1.31421	0.188775	NA	2	3	7	1	2	No Change	3	2	0	1	0	1
Gm37329	2.82522	-1.38941	1.45023	-0.958063	0.338031	NA	5	4	1	3	0	No Change	0	1	0	0	1	0
Gm7341	2.45856	0.407339	1.3662	0.298155	0.765585	NA	1	1	4	2	5	No Change	1	1	1	1	1	1
Gm38148	12.1414	-2.19938	0.71681	-3.06828	0.00215292	NA	13	20	16	4	5	No Change	6	8	3	1	1	0
Gm19938	15.2943	-1.8959	0.645995	-2.93485	0.00333708	NA	21	24	14	9	4	No Change	11	6	5	2	6	3
Gm37381	9.45206	0.116492	0.783919	0.148602	0.881867	NA	5	3	17	7	17	No Change	26	32	13	19	13	16
Gm6101	4.13247	0.075643	1.03237	0.0732713	0.94159	NA	4	3	4	4	6	No Change	1	3	1	2	1	2
Gm7357	119.86	0.483051	0.214527	2.25171	0.0243408	0.170871	79	114	93	146	192	No Change	65	72	65	90	77	83
Gm37323	2.26337	-2.96854	1.96465	-1.51097	0.130796	NA	2	8	0	1	0	No Change	1	0	0	0	1	0
Gm6085	391.3	0.357113	0.141806	2.51833	0.0117914	0.110629	297	337	332	458	593	No Change	200	186	146	204	233	224
Gm6119	18.0928	-0.413702	0.510574	-0.810268	0.417786	0.73541	19	20	16	16	19	No Change	14	7	5	7	2	7
Gm2053	5.25935	-0.106258	0.969075	-0.109649	0.912688	NA	4	8	3	8	3	No Change	6	8	7	5	4	3
Gm6123	159.439	0.189338	0.192722	0.982442	0.325882	0.667877	129	139	146	173	229	No Change	246	254	240	255	317	279
Mrpl15	658.902	0.0653171	0.136424	0.47878	0.632095	0.863359	544	647	590	594	1016	No Change	2111	2247	2211	2561	2686	2350
Gm37144	30.4246	-0.067518	0.405824	-0.166373	0.867864	0.960028	23	25	37	30	39	No Change	63	77	55	56	75	59
Lypla1	284.804	-0.450471	0.452197	-0.996183	0.319161	0.661204	160	304	424	231	316	No Change	1311	1732	1645	1786	1795	1630
Tcea1	479.048	-0.311185	0.152052	-2.04656	0.0407011	0.227207	366	519	551	414	567	No Change	595	633	705	738	772	667
Gm6104	44.3122	-0.427556	0.348968	-1.2252	0.220499	0.553568	42	57	37	44	40	No Change	32	19	19	7	14	10
Gm37277	2.78963	-1.57611	1.49734	-1.05261	0.292521	NA	7	3	0	1	2	No Change	2	1	0	0	0	1
Rgs20	12.8453	-0.461776	0.614466	-0.751508	0.452347	NA	14	10	15	12	12	No Change	22	24	12	16	17	20
Gm37079	2.6006	-0.543555	1.43207	-0.379559	0.704273	NA	5	3	0	1	4	No Change	6	1	2	5	0	1
Atp6v1h	278.237	0.0698238	0.155247	0.44976	0.652883	0.871953	228	276	247	282	389	No Change	732	803	770	982	1022	930
Gm37567	1.97571	1.03016	1.53519	0.67103	0.502202	NA	0	2	2	2	5	No Change	1	2	1	0	0	0
Oprk1	3.56263	-0.771434	1.14618	-0.673048	0.500917	NA	3	6	3	2	4	No Change	10	17	5	9	5	6
Rb1cc1	424.813	-0.240969	0.149869	-1.60786	0.107865	0.385295	322	479	453	369	532	No Change	797	973	885	1038	1082	981
4732440D04Rik	18.0697	-0.436413	0.518186	-0.842194	0.399679	0.722771	18	15	22	14	21	No Change	54	71	44	72	70	61
Gm2147	2.89235	0.964809	1.26376	0.763445	0.445198	NA	1	4	1	3	7	No Change	1	3	1	4	3	0
Gm19026	86.5962	0.103641	0.243847	0.425025	0.670818	0.879567	66	88	78	92	119	No Change	50	36	42	33	51	34
Gm37108	178.462	0.277675	0.182035	1.52539	0.127162	0.419657	139	160	153	200	266	No Change	8	9	5	2	6	7
Pcmtd1	447.727	-0.0895812	0.162287	-0.551994	0.580952	0.834945	316	468	487	388	635	No Change	529	873	639	826	759	833
Gm38372	214.522	-0.0282772	0.187457	-0.150847	0.880096	0.96317	143	233	224	214	282	No Change	300	432	358	462	394	473
Gm9826	275.992	0.193221	0.189883	1.01758	0.308879	0.653603	272	251	189	286	415	No Change	34	24	14	21	16	16
Gm26901	6.78117	-0.104959	0.866377	-0.121147	0.903574	NA	4	3	12	7	8	No Change	20	10	26	19	21	18
Gm16284	2.92431	-0.803127	1.3073	-0.614343	0.538989	NA	3	6	1	1	4	No Change	2	1	4	2	0	1
Gm15452	86.2311	0.0221572	0.250824	0.0883379	0.929608	0.979454	81	84	70	81	124	No Change	164	170	151	217	178	206
Gm36964	6.44197	0.283258	0.862752	0.328319	0.74267	NA	7	6	3	10	6	No Change	3	5	1	7	3	2
Gm24276	126.272	-0.453603	0.229251	-1.97863	0.0478579	0.248572	99	150	144	86	161	No Change	0	0	1	3	4	1
Gm6152	2.62453	-1.49842	1.4036	-1.06756	0.28572	NA	2	5	3	1	2	No Change	0	0	0	0	0	0
Gm7493	11.4299	0.000963097	0.634609	0.00151762	0.998789	NA	7	15	10	11	16	No Change	0	0	0	0	0	1
Gm6187	5.10572	0.341412	0.939284	0.363481	0.716246	NA	3	7	3	5	9	No Change	3	3	4	3	2	8
Gm7512	3.81124	-0.210197	1.08494	-0.193742	0.846378	NA	3	3	5	4	4	No Change	0	8	6	4	2	9
Rrs1	317.62	-0.146795	0.156566	-0.93759	0.348455	0.685775	278	321	308	324	366	No Change	806	761	810	779	979	773
Adhfe1	9.93952	0.0470302	0.671965	0.069989	0.944202	NA	8	9	10	9	15	No Change	24	34	27	23	17	28
Gm6161	312.987	0.094462	0.152254	0.620424	0.534979	0.808627	255	325	260	329	431	No Change	1	1	2	2	0	1
Mybl1	197.559	0.00855646	0.18049	0.0474068	0.962189	0.988473	145	204	196	192	274	No Change	344	451	412	529	492	524
Vcpip1	463.273	-0.24433	0.143372	-1.70417	0.0883492	0.348431	361	512	493	424	550	No Change	901	1121	929	1067	1121	1051
1700034P13Rik	2.21156	0.604775	1.43528	0.421365	0.673489	NA	2	1	2	1	6	No Change	2	10	8	7	2	4
Sgk3	86.2809	0.110263	0.262746	0.419657	0.674736	0.881654	58	77	96	81	133	No Change	279	266	237	268	266	220
Gm6195	42.9392	-0.367219	0.343271	-1.06976	0.284726	0.628552	38	44	48	31	56	No Change	113	122	130	170	161	155
Mcmdc2	27.8269	0.334256	0.411461	0.812365	0.416582	0.734581	17	28	25	30	45	No Change	112	88	79	104	73	77
Snhg6	261.534	-0.165997	0.166022	-0.999848	0.317384	0.660415	223	266	264	220	357	No Change	568	701	576	706	613	694
Snord87	10.6038	-1.8406	0.753261	-2.4435	0.0145455	NA	7	18	17	3	7	No Change	41	41	33	33	45	37
Tcf24	15.5404	-0.316459	0.565437	-0.559671	0.575704	NA	14	11	21	12	20	No Change	31	39	26	57	22	29
Cops5	460.903	-0.071488	0.137115	-0.521373	0.602107	0.846446	408	483	402	434	616	No Change	1420	1497	1324	1549	1574	1496
Cspp1	568.385	0.147379	0.131571	1.12015	0.26265	0.605312	426	546	531	572	850	No Change	936	1079	909	979	976	920
Arfgef1	726.426	-0.226656	0.14801	-1.53136	0.125681	0.417005	527	801	810	615	942	No Change	1456	1523	1163	1428	1228	1247
Gm37569	12.7343	-1.00813	0.664414	-1.51732	0.129185	NA	9	11	24	6	13	No Change	31	27	16	16	24	24
Gm15604	2.08437	-0.088743	1.57484	-0.0563503	0.955063	NA	0	1	5	1	4	No Change	1	1	0	1	1	0
Gm28659	2.16475	-0.0416815	1.40962	-0.0295693	0.976411	NA	2	2	2	2	3	No Change	3	3	2	1	3	1
Prex2	185.205	-0.520486	0.186429	-2.79187	0.00524037	0.0682915	184	217	178	156	185	No Change	152	236	169	180	179	147
A830018L16Rik	39.8931	-0.913187	0.376471	-2.42565	0.0152811	0.127603	42	45	47	34	25	No Change	38	58	32	42	48	40
Gm38178	18.3373	-0.124955	0.509557	-0.245223	0.806284	0.939487	15	15	22	16	25	No Change	10	19	14	7	12	9
Gm7560	6.94031	0.333633	0.858421	0.388659	0.697528	NA	5	5	7	13	4	No Change	0	1	0	0	0	0
Gm2383	28.473	0.197386	0.414823	0.475832	0.634194	0.864411	25	26	23	24	50	No Change	5	1	3	4	7	2
Sulf1	545.774	-0.812397	0.162149	-5.01019	5.43754e-07	8.73087e-05	530	639	643	446	410	Down	925	1043	533	655	695	653
Slco5a1	59.6833	-0.360441	0.29434	-1.22457	0.220737	0.553889	60	68	52	48	72	No Change	77	86	84	89	82	82
Gm29283	5.22237	0.224396	0.964941	0.232549	0.816112	NA	1	7	6	4	10	No Change	15	19	12	15	16	12
Prdm14	166.69	0.379621	0.192747	1.96954	0.0488916	0.252041	124	162	125	177	281	No Change	251	280	446	404	521	385
Ncoa2	580.659	0.0610479	0.128682	0.47441	0.635207	0.864834	476	544	548	593	800	No Change	840	1129	1165	1140	1180	1018
Gm38376	13.0972	0.332882	0.602798	0.552229	0.580792	NA	14	8	10	14	21	No Change	12	16	20	22	32	16
Gm37409	23.9572	-0.143529	0.456575	-0.31436	0.753247	0.917407	27	25	16	21	32	No Change	25	21	23	14	26	22
Gm38223	3.88249	0.172818	1.07869	0.16021	0.872716	NA	4	2	4	3	7	No Change	2	5	1	3	6	3
Gm37702	14.2256	-0.6589	0.615888	-1.06984	0.284692	NA	6	20	21	10	15	No Change	26	26	14	20	28	14
Gm38120	82.2644	0.0124106	0.257234	0.0482464	0.96152	0.988053	72	72	80	90	101	No Change	96	137	127	100	127	86
Gm38380	41.8167	-0.146595	0.357113	-0.4105	0.681439	0.885298	40	35	44	31	63	No Change	63	66	60	56	74	43
Tram1	527.375	-0.438938	0.152632	-2.87578	0.00403026	0.0578982	401	621	612	420	602	No Change	1469	1530	1307	1472	1431	1314
Lactb2	398.424	0.0601475	0.140266	0.428809	0.668062	0.878063	309	397	374	410	545	No Change	852	1237	1328	1721	1440	1697
Gm38319	51.3746	0.363755	0.327772	1.10978	0.267094	0.609943	31	60	38	50	92	No Change	65	89	85	108	83	85
Gm5523	25.819	0.461351	0.42975	1.07353	0.283032	0.626918	18	22	22	25	49	No Change	4	8	3	8	5	11
Eya1	58.0011	-0.816045	0.343977	-2.37238	0.0176737	0.141129	58	59	74	55	34	No Change	100	109	67	50	67	50
Gm9947	8.51794	0.845346	0.749603	1.12772	0.259436	NA	6	9	3	9	19	No Change	12	19	11	9	16	8
Msc	63.9915	0.315148	0.295324	1.06713	0.285914	0.629934	49	61	50	88	77	No Change	140	108	127	103	147	100
Gm37412	4.31692	-1.07012	1.05996	-1.00959	0.312691	NA	4	5	6	3	3	No Change	4	5	2	1	6	2
Smt3h2-ps4	115.019	0.102712	0.223398	0.459771	0.645681	0.870173	103	114	90	111	172	No Change	0	0	0	0	0	0
Rpl5-ps1	1350.23	0.27203	0.109283	2.48924	0.0128018	0.116182	1031	1320	1087	1494	2031	No Change	2	7	4	6	6	1
Trpa1	11.9766	-0.576026	0.63482	-0.907386	0.364203	NA	10	15	13	12	9	No Change	45	40	38	22	38	18
Gm10566	188.543	0.539372	0.181625	2.96969	0.00298097	0.0472096	135	173	132	234	308	Up	2	3	2	0	2	4
Terf1	513.566	0.289372	0.132489	2.18411	0.0289539	0.186913	399	477	421	601	739	No Change	1034	1280	1330	1599	1537	1552
Gm37509	62.0427	0.15378	0.288999	0.532112	0.594648	0.842185	46	54	63	71	82	No Change	36	76	61	66	69	58
4930444P10Rik	2.46932	-1.48303	1.52344	-0.973473	0.330318	NA	5	3	1	0	3	No Change	1	1	0	1	0	1
Rpl7	1654.71	0.221051	0.108591	2.03563	0.0417877	0.230455	1350	1549	1364	1852	2363	No Change	3997	4423	3864	5242	4581	5068
Rdh10	57.4782	-0.541384	0.299054	-1.81032	0.0702457	0.307257	56	60	64	47	58	No Change	123	99	84	94	117	103
Stau2	143.655	-0.146276	0.208876	-0.7003	0.48374	0.778738	121	137	153	120	200	No Change	271	318	245	289	250	240
Ube2w	92.7189	-0.258736	0.256317	-1.00944	0.312765	0.65764	62	118	97	78	118	No Change	298	332	281	319	322	269
Gm38342	2.53641	-2.1909	1.57857	-1.3879	0.165168	NA	4	2	4	0	2	No Change	0	5	8	2	4	9
Eloc	205.51	-0.523323	0.179011	-2.92341	0.00346223	0.0523689	184	224	236	162	219	No Change	873	953	995	1071	1116	957
Tmem70	118.6	-0.0213131	0.213721	-0.0997242	0.920563	0.97543	100	117	111	117	158	No Change	283	295	292	357	297	319
Gm5828	55.7961	0.580766	0.295536	1.96513	0.0493997	0.253579	39	45	44	69	94	No Change	55	52	45	52	62	56
Jph1	185.751	-0.337562	0.183173	-1.84285	0.0653502	0.295127	178	199	179	167	206	No Change	257	268	164	273	193	279
Gdap1	2.35217	-3.02793	1.83488	-1.6502	0.0989014	NA	3	5	2	1	0	No Change	0	2	4	3	2	2
Gm5251	17.4441	0.107855	0.539491	0.19992	0.841543	0.951468	8	17	22	21	21	No Change	15	19	20	15	29	16
Rbm6-ps1	133.26	-0.172755	0.213368	-0.809659	0.418136	0.735586	120	120	142	121	169	No Change	89	100	94	105	95	67
Gm16070	6.43572	-2.48249	1.05413	-2.35502	0.0185215	NA	3	11	13	2	2	No Change	26	11	2	3	8	3
Crispld1	21.0269	-0.503848	0.491477	-1.02517	0.305282	0.650373	15	33	19	15	25	No Change	61	62	18	26	25	28
Gm7690	2.93118	0.876441	1.26004	0.695565	0.486701	NA	3	2	1	2	8	No Change	4	3	1	3	4	5
Gm17969	12.1716	-0.0365629	0.645497	-0.056643	0.95483	NA	6	12	16	16	11	No Change	6	19	16	9	23	13
Gm28756	2.84966	-1.39138	1.53011	-0.909332	0.363175	NA	6	4	0	3	0	No Change	3	3	0	0	0	1
Gm17837	78.3428	-0.00540166	0.262811	-0.0205534	0.983602	0.994096	54	81	82	82	100	No Change	19	8	8	11	8	8
Gm10075	63.8075	-0.0431849	0.303303	-0.142382	0.886778	0.965879	65	64	47	74	69	No Change	0	0	1	0	1	0
Gm4849	321.57	-0.176861	0.151264	-1.16922	0.242314	0.580958	284	341	302	313	380	No Change	258	277	268	262	272	249
Pkhd1	35.7645	-0.573761	0.376886	-1.52237	0.127915	0.42095	28	45	41	31	33	No Change	60	58	78	66	100	67
Gm15795	4.05668	0.965681	1.05398	0.916222	0.35955	NA	3	3	2	7	6	No Change	1	0	1	0	0	0
Il17f	7.01315	0.584333	0.867916	0.673261	0.500782	NA	3	2	11	7	14	No Change	11	12	8	13	8	11
Mcm3	1911.18	0.115258	0.110274	1.04519	0.295936	0.641018	1621	1893	1570	2050	2619	No Change	4907	5023	4861	5812	5725	5438
Paqr8	51.3167	-0.112626	0.331136	-0.340119	0.733767	0.908131	45	64	37	58	54	No Change	70	87	40	67	69	66
Efhc1	8.95625	0.821539	0.711141	1.15524	0.247992	NA	5	7	7	10	19	No Change	11	21	11	14	10	10
Tram2	165.784	-0.0457553	0.189788	-0.241087	0.809488	0.941204	141	181	141	161	220	No Change	263	293	215	254	262	262
Tmem14a	8.02203	0.341911	0.752518	0.454356	0.649572	NA	6	9	5	11	10	No Change	33	33	27	35	36	23
Gm38224	2.37751	0.820577	1.38293	0.59336	0.55294	NA	1	2	2	5	2	No Change	1	1	1	3	1	2
Gsta3	9.28071	-0.279027	0.760675	-0.366815	0.713757	NA	14	9	4	5	15	No Change	24	34	59	61	71	62
Gm28836	3.29961	-0.24736	1.18027	-0.20958	0.833996	NA	1	5	4	3	4	No Change	4	3	6	6	6	14
Kcnq5	4.43815	-0.213537	1.02367	-0.208599	0.834761	NA	3	6	4	6	3	No Change	10	11	9	7	9	6
Gm7658	523.278	0.0980063	0.136651	0.717203	0.473249	0.772812	398	500	505	511	774	No Change	468	537	414	576	562	581
Gm38243	2.59236	-2.10265	1.53054	-1.37379	0.169506	NA	5	3	2	1	1	No Change	2	3	7	1	3	1
Rims1	135.642	0.0263953	0.202543	0.130319	0.896314	0.968543	110	140	121	140	180	No Change	202	157	169	158	157	124
Gm27028	2.5031	-0.0840951	1.34491	-0.0625284	0.950142	NA	3	2	2	1	5	No Change	8	13	16	13	16	11
Ogfrl1	99.5554	-0.0801622	0.239836	-0.334238	0.7382	0.910135	73	119	91	88	140	No Change	180	189	146	170	145	183
Smap1	235.167	-0.0294563	0.172676	-0.170587	0.864549	0.95867	178	231	245	224	322	No Change	519	588	549	666	575	550
Sdhaf4	20.4976	0.580501	0.497416	1.16703	0.243196	0.581667	18	17	12	18	44	No Change	108	119	109	127	122	124
Fam135a	316.614	-0.365732	0.156898	-2.33102	0.0197521	0.151347	255	378	330	273	358	No Change	636	698	479	557	504	512
Tubb4b-ps2	79.3384	-0.132019	0.270333	-0.488357	0.625297	0.860372	69	99	60	67	111	No Change	16	6	11	7	14	9
Gm28439	1847.67	-1.08991	0.407367	-2.67551	0.00746165	0.0847107	1255	2318	2954	1213	1324	No Change	2	0	0	0	0	3
Gm10222	571.87	-0.870481	0.310141	-2.80673	0.00500476	0.0663623	428	673	835	404	482	No Change	1	1	0	0	0	0
Gm28438	1043.37	-1.07813	0.371792	-2.89982	0.0037338	0.0551188	700	1435	1557	632	830	No Change	19	36	20	19	25	15
Gm28437	8292.29	-0.378319	0.143206	-2.64178	0.0082471	0.0895366	6079	9700	9582	6233	10485	No Change	3	1	1	3	2	0
Gm10925	8433.02	-0.497779	0.290668	-1.71253	0.0867984	0.345552	5716	9812	11016	6417	9518	No Change	2	2	0	1	1	0
Gm28661	9246.56	-0.164371	0.103045	-1.59515	0.110679	0.390469	8019	9463	9089	7960	12437	No Change	1	3	1	1	3	1
Gm29216	6919.17	-0.0757451	0.109888	-0.689296	0.490637	0.784089	5449	6872	7144	6357	9439	No Change	1	2	1	1	4	2
Lmbrd1	100.241	-0.232829	0.230066	-1.01201	0.311534	0.656421	90	105	98	91	121	No Change	254	276	212	235	249	189
Adgrb3	19.4578	-0.142562	0.496229	-0.28729	0.77389	0.92559	18	16	21	21	21	No Change	21	28	16	13	13	15
Gm15702	5.13244	0.836352	0.94264	0.887244	0.374947	NA	2	5	4	5	12	No Change	0	0	0	0	0	0
Gm38286	2.51178	0.840807	1.38962	0.605063	0.545137	NA	3	0	2	3	5	No Change	2	2	1	0	1	0
Gm38260	4.80484	-0.237919	1.02608	-0.231871	0.816638	NA	6	4	4	1	10	No Change	10	5	10	6	7	3
Gm37628	6.45932	0.232565	0.840235	0.276785	0.781945	NA	4	9	4	6	11	No Change	20	12	17	12	8	14
8030445P17Rik	4.57397	-1.54286	1.09085	-1.41436	0.157257	NA	4	4	9	2	3	No Change	8	7	9	5	9	6
Gm38198	11.2027	-0.54251	0.663342	-0.817844	0.413447	NA	9	10	16	11	9	No Change	14	12	2	6	6	9
Gm37077	7.74074	-0.444937	0.768452	-0.579004	0.562586	NA	6	9	9	6	9	No Change	15	7	9	10	10	2
Gm37895	11.3592	-0.942519	0.677834	-1.39049	0.164381	NA	7	13	19	8	9	No Change	22	29	13	16	13	9
Gm36952	10.7635	-0.0152915	0.647677	-0.0236098	0.981164	NA	8	13	9	11	14	No Change	27	20	13	18	12	14
Gm37602	8.27059	-0.338844	0.780287	-0.434255	0.664103	NA	4	9	12	10	6	No Change	21	12	7	15	11	16
2900022M07Rik	3.39277	-1.00854	1.20611	-0.83619	0.403048	NA	3	7	2	2	3	No Change	10	7	10	6	3	5
Gm19028	49.4613	-0.538668	0.34573	-1.55806	0.11922	0.405654	31	70	57	44	46	No Change	38	21	27	28	35	26
Gm7846	37.2609	-0.301377	0.383156	-0.786565	0.431536	0.746617	30	53	29	39	36	No Change	90	68	76	62	63	74
Gm5697	32.2152	0.271182	0.40104	0.676196	0.498916	0.787805	19	25	38	36	48	No Change	19	16	22	29	21	30
Gm5525	646.283	0.250196	0.135319	1.84892	0.0644686	0.292804	510	667	481	716	955	No Change	57	88	49	80	88	75
Gm6473	53.3194	0.00299357	0.303745	0.00985553	0.992137	0.997291	47	51	48	56	68	No Change	26	30	22	33	43	41
Phf3	2488.84	0.053538	0.0998127	0.536385	0.591693	0.840726	2045	2424	2274	2507	3456	No Change	3719	4099	3796	4387	4233	4357
Gm37522	73.3175	-0.363949	0.270146	-1.34723	0.177906	0.501552	58	84	81	57	91	No Change	92	102	80	96	104	95
Gm37906	129.468	-0.372498	0.238715	-1.56043	0.118659	0.405139	85	148	163	106	153	No Change	172	219	198	203	191	168
Ptp4a1	360.846	-0.480533	0.163298	-2.94268	0.00325384	0.0499811	305	377	439	276	411	Down	136	152	145	140	146	157
Gm6489	2.92021	0.310982	1.31843	0.235874	0.813531	NA	4	0	3	2	6	No Change	5	3	11	9	8	12
Gm19680	78.6734	0.403038	0.261529	1.54108	0.123297	0.413322	62	78	52	94	121	No Change	47	59	56	91	83	81
Khdrbs2	4.28243	-1.1162	1.10346	-1.01155	0.311756	NA	3	3	9	2	4	No Change	10	13	13	15	18	11
Gm37110	2.59283	1.04711	1.31085	0.798798	0.424408	NA	2	2	1	3	6	No Change	0	0	0	0	0	0
Gm37911	7.2291	-0.000331615	0.827239	-0.00040087	0.99968	NA	3	5	12	7	10	No Change	21	21	28	19	31	5
Gm37792	5.3874	-0.259288	0.951607	-0.272474	0.785257	NA	2	5	9	6	5	No Change	13	18	11	26	26	29
Gm7114	60.1709	-0.0960606	0.293143	-0.327692	0.743144	0.911918	54	68	48	62	72	No Change	24	29	40	45	41	36
Gm7933	18.8517	-0.27017	0.499293	-0.541106	0.588435	0.838755	16	24	16	18	21	No Change	6	6	10	1	7	4
Prim2	198.607	-0.0439796	0.184102	-0.238887	0.811193	0.94131	187	193	171	180	280	No Change	423	488	405	494	481	493
Gm29228	2.07457	1.03798	1.45794	0.711951	0.476495	NA	1	1	2	3	4	No Change	3	0	2	5	2	2
Gm37618	45.1024	-0.0828338	0.330734	-0.250455	0.802236	0.937228	43	42	41	46	55	No Change	76	80	53	75	77	79
Rab23	239.697	-0.182349	0.169148	-1.07804	0.281016	0.625139	205	237	250	210	312	No Change	491	551	400	435	474	410
Bag2	33.4551	-0.64268	0.395827	-1.62364	0.104453	0.379172	29	51	29	24	35	No Change	78	70	44	52	52	62
Zfp451	985.64	-0.290838	0.12563	-2.31504	0.0206106	0.155101	785	1078	1075	849	1191	No Change	2021	2099	1764	1946	2079	1775
Gm15455	94.4504	0.0342516	0.237241	0.144375	0.885204	0.965488	78	87	92	92	133	No Change	64	49	69	62	92	59
Bend6	13.0207	-1.76539	0.717903	-2.45909	0.013929	NA	16	28	7	3	10	No Change	9	8	5	13	9	4
Gm37067	2.32799	-1.92952	1.58615	-1.21648	0.223803	NA	4	4	1	1	1	No Change	2	2	1	3	2	1
Dst	7341.14	-0.240384	0.0976901	-2.46068	0.0138675	0.12163	6490	8053	7000	6888	8502	No Change	7741	9155	6279	6617	7142	6521
Gm37354	40.7215	-0.390721	0.395593	-0.987685	0.323307	0.665585	37	30	56	24	59	No Change	62	72	64	58	60	51
Gm38157	47.115	-0.194051	0.34216	-0.567133	0.570624	0.827887	28	63	48	43	59	No Change	64	64	37	51	33	48
Gm26788	6.17095	0.285567	0.868921	0.328646	0.742423	NA	2	8	6	8	8	No Change	8	7	2	4	5	2
Gm37233	15.7153	0.499495	0.537766	0.928832	0.352976	NA	11	13	13	21	23	No Change	34	46	34	23	40	25
Ccdc115	63.1488	-0.328418	0.299785	-1.09551	0.273293	0.61719	59	76	54	66	59	No Change	222	193	221	167	289	194
Imp4	662.112	-0.224013	0.124721	-1.79612	0.0724757	0.312251	562	728	647	624	776	No Change	1807	1697	1733	1658	2134	1536
Ptpn18	16.8865	0.523165	0.525969	0.994669	0.319897	0.661532	15	11	13	21	27	No Change	57	69	36	48	46	66
Cfc1	2.25059	-2.0112	1.62396	-1.23845	0.215549	NA	3	4	2	0	2	No Change	6	6	9	6	11	7
Arhgef4	51.9669	-0.24613	0.316671	-0.77724	0.437017	0.750785	49	48	55	40	71	No Change	86	107	52	92	48	99
Gm38336	13.6382	-0.336653	0.582139	-0.578303	0.56306	NA	13	15	13	10	18	No Change	20	16	16	13	17	16
Fam168b	555.791	-0.202662	0.130111	-1.55761	0.119326	0.405799	504	567	539	521	667	No Change	1102	1031	944	1022	1109	996
Plekhb2	104.405	0.226607	0.228648	0.991072	0.32165	0.663716	80	103	87	103	168	No Change	196	254	168	252	236	251
Gm37670	21.2159	0.0387491	0.491366	0.0788599	0.937144	0.981862	12	21	25	27	22	No Change	16	30	21	31	21	35
Gm33222	3.46674	0.648831	1.15867	0.559978	0.575495	NA	1	5	2	6	4	No Change	5	7	16	14	14	13
Hs6st1	710.629	0.0933708	0.121995	0.765369	0.444052	0.755836	576	716	614	760	960	No Change	1153	1217	1101	1245	1384	1095
Uggt1	1055.75	0.185868	0.116006	1.60222	0.109106	0.387847	766	1029	968	1138	1525	No Change	2144	2219	2180	2403	2572	2257
Arid5a	26.6344	-0.0602994	0.441463	-0.13659	0.891355	0.967306	20	22	32	32	27	No Change	36	57	41	39	47	37
Kansl3	440.362	0.171161	0.135062	1.26728	0.205057	0.535481	347	432	376	466	640	No Change	796	826	659	792	852	789
Lman2l	132	0.219707	0.20668	1.06303	0.287768	0.632548	101	120	120	135	205	No Change	246	271	226	288	267	299
Cnnm4	98.453	0.144089	0.246173	0.585318	0.558334	0.820752	89	87	83	87	162	No Change	169	180	98	176	143	159
Gm37909	6.60976	0.81721	0.846097	0.965858	0.334115	NA	4	7	3	12	8	No Change	16	10	12	20	11	12
Cnnm3	272.259	-0.137882	0.157478	-0.875566	0.381266	0.710147	237	292	249	259	341	No Change	337	446	320	380	334	365
Ankrd23	3.46538	-0.135278	1.13374	-0.11932	0.905022	NA	3	4	3	2	6	No Change	5	1	2	6	3	7
Ankrd39	28.523	-0.167863	0.41094	-0.408486	0.682917	0.885624	28	30	24	23	40	No Change	42	43	40	45	42	38
Sema4c	68.6348	-0.294494	0.29056	-1.01354	0.310803	0.655516	77	72	53	64	76	No Change	126	131	62	110	82	94
Fam178b	60.7707	0.268611	0.295816	0.908033	0.363861	0.696122	56	51	46	74	82	No Change	102	132	75	102	126	142
Gm6428	8.09971	1.13478	0.784459	1.44657	0.148017	NA	7	6	2	9	20	No Change	0	0	0	0	0	0
Cox5b	96.3389	0.042399	0.248123	0.170879	0.864319	0.958556	96	93	71	101	127	No Change	263	326	296	313	347	363
Actr1b	478.915	-0.122424	0.137361	-0.891263	0.372788	0.702996	441	476	440	464	596	No Change	819	864	748	955	1017	868
Zap70	24.5276	1.21	0.452596	2.67347	0.00750709	0.0849086	10	21	14	32	57	No Change	37	48	68	92	74	77
Tmem131	1672.35	-0.118846	0.111999	-1.06113	0.288629	0.633295	1351	1689	1717	1610	2103	No Change	2833	2960	2636	2635	3064	2401
Gm37506	6.15957	-0.794585	0.908961	-0.874168	0.382027	NA	10	7	3	4	6	No Change	7	10	10	8	12	6
Gm38115	83.9316	-0.366242	0.250568	-1.46165	0.143837	0.44826	73	90	91	69	99	No Change	124	125	125	112	145	102
F830112A20Rik	132.911	-0.0295305	0.210301	-0.14042	0.888328	0.966078	95	143	133	133	174	No Change	189	218	201	218	219	173
Rpl12-ps1	84.7423	0.150558	0.268061	0.561658	0.574349	0.829886	85	62	73	90	120	No Change	1	3	0	0	1	1
Vwa3b	27.0564	0.636872	0.428452	1.48645	0.137161	0.436892	19	20	22	26	57	No Change	51	67	93	98	129	105
Cnga3	8.8136	1.45041	0.802384	1.80763	0.0706648	NA	2	11	2	10	25	No Change	14	29	30	53	29	43
Inpp4a	130.002	0.093937	0.212546	0.44196	0.658518	0.874457	98	147	106	130	188	No Change	168	207	179	199	234	200
Coa5	357.103	-0.189656	0.158796	-1.19434	0.232344	0.567099	299	337	395	339	428	No Change	826	934	928	987	1064	932
Unc50	90.4294	-0.14539	0.249072	-0.583727	0.559404	0.821234	65	96	99	89	109	No Change	237	331	246	287	293	283
Mgat4a	169.049	-0.014177	0.189567	-0.0747863	0.940385	0.98259	146	179	142	175	216	No Change	267	291	262	297	296	264
4930594C11Rik	11.8497	-0.95917	0.682335	-1.40572	0.159808	NA	6	24	12	7	11	No Change	19	22	15	14	15	17
2010300C02Rik	12.644	-0.192266	0.618311	-0.310953	0.755836	NA	12	17	8	9	19	No Change	13	20	10	11	9	18
Tsga10	22.5266	-0.163462	0.47513	-0.344036	0.730819	0.906853	15	29	22	15	36	No Change	45	51	56	55	54	67
Lipt1	38.5378	0.00108099	0.360802	0.00299609	0.997609	0.999324	34	31	40	42	47	No Change	106	103	104	152	126	125
Mitd1	67.1955	0.0074389	0.277905	0.0267677	0.978645	0.993151	51	75	60	60	100	No Change	224	215	202	256	264	239
Mrpl30	177.703	0.192117	0.200282	0.959236	0.33744	0.676277	167	165	128	181	271	No Change	444	471	477	612	589	545
Txndc9	305.747	0.0273	0.172055	0.158671	0.873928	0.961477	207	305	328	296	432	No Change	898	927	873	976	1061	874
Eif5b	1495.06	0.0415436	0.107441	0.386664	0.699005	0.89268	1172	1487	1414	1522	2035	No Change	3009	3247	3362	3375	3772	3085
Rev1	986.964	-0.0934415	0.112687	-0.829215	0.406983	0.727869	835	1037	917	925	1302	No Change	1464	1616	1054	1369	1273	1345
Gm37062	51.6128	-0.33094	0.328832	-1.00641	0.314218	0.658392	50	46	58	35	72	No Change	80	60	44	65	64	68
Aff3	173.448	-0.27812	0.1932	-1.43954	0.149997	0.457607	172	174	165	141	222	No Change	355	332	114	221	162	187
Lonrf2	2.26199	-1.10807	1.46996	-0.75381	0.450963	NA	2	4	2	2	1	No Change	6	4	5	3	1	4
Chst10	59.8504	-0.19002	0.292524	-0.649587	0.515959	0.798075	52	72	50	56	73	No Change	77	67	65	77	68	52
Pdcl3	235.794	0.190537	0.169708	1.12273	0.261552	0.603912	175	229	211	274	316	No Change	545	553	537	665	675	590
Gm37309	15.1247	-0.0556677	0.567014	-0.098177	0.921792	NA	10	18	15	10	26	No Change	26	28	14	26	27	26
Npas2	2.92156	1.27177	1.26282	1.00709	0.313893	NA	2	1	2	6	4	No Change	6	7	4	3	5	6
Rpl31	301.32	-0.104649	0.152501	-0.686218	0.492576	0.785426	257	323	274	293	380	No Change	349	361	336	362	383	372
Tbc1d8	98.3174	0.169336	0.249319	0.679197	0.497013	0.787366	86	98	74	86	166	No Change	108	121	102	103	71	109
Cnot11	301.293	-0.266061	0.153573	-1.73248	0.0831889	0.33786	267	328	294	280	345	No Change	646	681	718	673	825	660
Gm15832	16.1965	-0.486912	0.540525	-0.900814	0.367687	NA	16	17	17	15	15	No Change	39	53	41	43	68	43
Snord89	4.62239	-0.135866	0.991751	-0.136996	0.891034	NA	4	3	6	5	5	No Change	8	14	7	9	8	11
Rnf149	213.498	-0.345904	0.172557	-2.00458	0.0450083	0.240921	201	236	205	178	253	No Change	412	466	375	417	482	367
Gm23722	9.50163	-0.363553	0.832029	-0.436947	0.66215	NA	6	7	16	1	20	No Change	16	14	11	13	12	11
D930019O06Rik	2.09169	0.463606	1.45368	0.318918	0.749789	NA	1	1	3	2	4	No Change	7	11	24	20	22	10
Map4k4	2212.87	-0.060561	0.113203	-0.534978	0.592665	0.841097	1921	2246	2016	2329	2657	No Change	3681	3756	3255	3495	3759	3342
Il1r2	2.21682	1.82179	1.56923	1.16094	0.245666	NA	1	0	2	1	9	No Change	10	8	18	21	18	26
Il1r1	8.80121	1.48485	0.761571	1.94972	0.0512091	NA	3	4	7	19	13	No Change	14	22	11	14	22	15
Gm38070	2.63346	0.00152247	1.31815	0.00115501	0.999078	NA	4	2	1	3	3	No Change	0	1	1	1	0	0
Il1rl2	5.9214	0.300994	0.902947	0.333347	0.738873	NA	2	5	8	9	6	No Change	13	15	16	23	17	20
Mfsd9	8.762	1.58341	0.793953	1.99433	0.0461156	NA	1	9	4	10	26	No Change	23	21	35	38	27	49
Mrps9	224.671	0.116146	0.174212	0.666696	0.504966	0.791877	190	217	191	212	346	No Change	614	662	535	717	641	712
Tgfbrap1	108.752	-0.282409	0.237312	-1.19004	0.234033	0.568976	98	134	91	108	114	No Change	151	187	141	181	169	178
AI597479	165.55	0.0333192	0.190216	0.175165	0.86095	0.957932	127	168	158	157	239	No Change	426	557	512	623	571	574
Fhl2	26.7134	-0.427287	0.430161	-0.99332	0.320554	0.662438	21	38	24	22	30	No Change	54	49	19	23	29	30
Gm8210	111.159	0.259556	0.222735	1.16531	0.243893	0.582703	92	94	96	127	160	No Change	1	2	3	1	2	1
Nck2	122.172	-0.0659768	0.221216	-0.298246	0.765515	0.92348	95	117	130	129	146	No Change	143	160	146	186	175	213
Gm37536	20.4509	-0.423757	0.478976	-0.884716	0.37631	0.705851	18	25	20	16	24	No Change	24	26	18	16	26	26
Gm38228	30.9488	-0.289087	0.397246	-0.727728	0.46678	0.769513	24	31	37	27	37	No Change	62	40	31	32	49	32
Gm29155	4.70959	-0.665424	1.01484	-0.655692	0.512022	NA	4	3	8	4	4	No Change	1	5	8	4	8	1
Gm29156	4.68354	-1.23251	1.06305	-1.15941	0.24629	NA	2	6	9	3	3	No Change	10	5	3	9	4	7
Uxs1	147.723	-0.308771	0.19715	-1.56618	0.117307	0.402607	136	157	147	126	177	No Change	292	318	331	356	369	335
Gm16103	20.0386	0.448309	0.477228	0.939402	0.347525	0.685372	15	16	17	23	33	No Change	0	2	1	0	1	2
Gm19587	80.2811	-0.0317926	0.26766	-0.11878	0.90545	0.97154	65	99	61	71	117	No Change	175	172	146	197	175	153
Tpp2	891.101	-0.257325	0.118838	-2.16534	0.0303615	0.192265	767	963	898	750	1131	No Change	2247	2486	2155	2624	2624	2309
Gm8251	10.5134	-0.369165	0.717738	-0.514346	0.60701	NA	10	5	16	12	8	No Change	19	15	28	23	33	9
Tex30	61.308	-0.0973582	0.29135	-0.334162	0.738257	0.910135	48	57	68	61	76	No Change	269	265	277	328	324	276
Poglut2	133.824	-0.44655	0.215742	-2.06984	0.0384676	0.218918	126	151	136	92	170	No Change	276	309	232	343	249	345
Bivm	128.932	-0.242393	0.214623	-1.12939	0.258732	0.600144	100	148	133	106	169	No Change	321	317	244	335	293	313
Ercc5	431.282	0.10037	0.146915	0.683182	0.494492	0.786503	367	374	407	428	629	No Change	614	800	403	578	459	589
Gm15833	3.1823	-0.839585	1.29042	-0.650629	0.515286	NA	7	1	2	2	3	No Change	0	1	1	2	0	3
Gm5700	2.58433	-1.08227	1.6114	-0.671631	0.501818	NA	1	0	8	0	4	No Change	1	0	1	0	1	0
Txn-ps1	130.735	-0.260219	0.212227	-1.22613	0.220148	0.553102	128	133	122	124	147	No Change	50	53	62	65	52	69
Gulp1	21.9574	-2.03437	0.537841	-3.78247	0.000155277	0.00575712	22	42	24	8	10	Down	48	54	22	26	17	34
Gm37626	21.02	-0.500342	0.487439	-1.02647	0.30467	0.64954	19	18	28	18	21	No Change	36	44	20	21	17	17
Gm16102	2.88319	-0.500069	1.28805	-0.388237	0.697841	NA	2	4	3	4	1	No Change	6	7	5	5	6	3
Col3a1	2.28482	-2.98952	1.88542	-1.5856	0.112831	NA	2	7	1	1	0	No Change	0	14	1	0	2	2
Col5a2	44.7188	-1.23584	0.363494	-3.3999	0.000674108	0.016532	61	55	42	27	30	Down	45	79	22	26	29	23
Gm38211	5.66867	-2.19416	1.08168	-2.02846	0.0425128	NA	8	4	10	3	1	No Change	12	6	3	2	2	1
Gm7063	3.00332	0.0115549	1.29898	0.0088954	0.992903	NA	5	3	0	3	4	No Change	5	7	8	4	6	3
Wdr75	699.88	-0.231382	0.125194	-1.84819	0.0645747	0.29311	610	724	713	599	894	No Change	2174	2128	2121	2366	2558	2166
Gm5526	156.364	0.0207998	0.202691	0.102619	0.918266	0.974883	148	137	139	165	201	No Change	24	28	21	24	28	37
Gm5269	14.9	0.0228721	0.554009	0.0412847	0.967069	NA	10	16	15	16	19	No Change	0	0	0	0	0	0
Slc40a1	94.7684	-0.762323	0.256035	-2.97742	0.00290687	0.0462779	75	138	103	70	86	Down	154	165	76	91	94	73
Gm9496	3.58271	-0.126945	1.15693	-0.109726	0.912627	NA	3	1	6	3	5	No Change	0	0	0	0	2	2
Dnah7b	12.059	-0.879941	0.65252	-1.34853	0.177489	NA	15	14	11	11	7	No Change	15	10	4	6	5	13
Gm8326	152.243	0.0910953	0.198483	0.458959	0.646264	0.870492	135	134	137	155	215	No Change	3	4	1	0	0	2
Dnah7c	6.45722	-0.688018	0.853243	-0.806356	0.420038	NA	5	7	9	5	6	No Change	3	2	6	4	6	3
Slc39a10	773.967	-0.30251	0.125959	-2.40166	0.016321	0.134508	653	843	812	717	859	No Change	1564	1621	1502	1799	1811	1596
Gm28151	13.1903	-0.403858	0.613134	-0.658677	0.510103	NA	9	17	15	7	20	No Change	23	51	34	41	35	25
Gm4852	62.9754	0.282345	0.291063	0.970046	0.332024	0.671578	56	53	49	79	83	No Change	0	0	2	0	1	3
Gm8337	440.735	0.143642	0.141224	1.01713	0.309093	0.653633	367	391	402	449	649	No Change	7	7	7	9	10	5
Tmeff2	2.58664	-1.43773	1.51429	-0.949442	0.342396	NA	5	0	4	1	2	No Change	3	12	1	2	3	1
Nabp1	225.362	0.08834	0.181267	0.487346	0.626013	0.860719	153	228	228	218	334	No Change	561	710	738	926	899	902
Myo1b	764.331	0.147763	0.121838	1.21278	0.225212	0.559744	570	747	705	784	1124	No Change	1417	1714	1349	1708	1582	1733
Gm29453	10.6884	-0.230924	0.659736	-0.350025	0.72632	NA	12	10	9	8	15	No Change	13	27	11	12	16	14
Gm28323	16.0034	-0.245161	0.551658	-0.444407	0.656748	NA	10	24	14	14	20	No Change	26	37	24	14	28	23
Gm8420	98.6588	0.275875	0.230621	1.19623	0.231608	0.566694	76	88	86	112	145	No Change	56	50	42	67	63	65
Stat4	65.8264	0.350161	0.28958	1.2092	0.226585	0.561589	44	57	63	62	119	No Change	143	160	135	171	148	170
Gm3940	126.334	0.514088	0.247006	2.08128	0.0374083	0.215985	123	87	82	145	217	No Change	1	1	1	0	0	2
Stat1	35.1717	-0.236808	0.375902	-0.629973	0.528712	0.8047	35	33	34	36	37	No Change	91	87	98	89	88	91
Gls	515.445	-0.498487	0.145098	-3.43553	0.000591406	0.0150898	415	627	576	394	579	Down	1151	1249	1028	1254	1298	1224
Nab1	91.9758	-0.343406	0.266077	-1.29063	0.196832	0.527139	60	105	114	85	99	No Change	201	228	267	261	252	218
Gm5527	48.4956	-0.219071	0.322223	-0.679876	0.496583	0.78706	43	45	53	41	63	No Change	0	0	0	0	0	0
Nemp2	146.318	-0.040701	0.202584	-0.20091	0.840769	0.951231	114	152	143	129	212	No Change	266	291	239	376	262	345
Mfsd6	21.2765	0.100176	0.47451	0.211114	0.832798	0.949132	16	18	23	18	35	No Change	58	41	20	28	24	27
Inpp1	13.9565	0.274704	0.584757	0.469774	0.638517	NA	15	11	9	13	24	No Change	58	43	27	33	46	50
Hibch	73.7621	0.0773502	0.278344	0.277894	0.781093	0.929552	54	74	72	60	123	No Change	168	221	211	291	252	279
1700019D03Rik	189.039	-0.498852	0.214949	-2.3208	0.0202979	0.153566	166	177	243	172	176	No Change	234	302	257	265	312	278
1700019A02Rik	17.1582	0.439884	0.55401	0.793999	0.427196	0.743025	8	15	19	13	37	No Change	100	100	110	116	102	90
Pms1	196.483	-0.319933	0.178284	-1.79451	0.0727316	0.312715	166	227	197	165	237	No Change	420	453	367	484	465	436
Ormdl1	44.6732	-0.896904	0.350338	-2.56011	0.0104639	0.103384	35	67	51	30	39	No Change	133	141	151	182	171	150
Osgepl1	46.0984	-0.410598	0.329279	-1.24696	0.212411	0.54316	48	48	44	38	52	No Change	140	146	113	191	159	156
Asnsd1	59.8407	0.409575	0.297394	1.37721	0.168447	0.488514	40	61	46	59	109	No Change	159	174	146	203	191	214
Dnah7a	54.2125	-0.328007	0.325399	-1.00801	0.313448	0.658151	37	55	71	51	58	No Change	114	75	70	57	76	62
Stk17b	192.739	-0.0853147	0.183307	-0.465419	0.641632	0.868496	144	207	195	177	261	No Change	466	556	452	548	492	537
Hecw2	135.161	-0.691911	0.219059	-3.15856	0.0015855	0.0306504	120	169	151	114	113	Down	331	298	330	318	360	290
Gm37633	4.38128	-0.64307	1.08856	-0.590752	0.554686	NA	3	5	6	6	1	No Change	14	9	5	3	4	6
Ccdc150	14.4465	0.790214	0.58778	1.3444	0.178818	NA	11	15	5	17	29	No Change	15	29	16	28	18	24
Gtf3c3	320.173	-0.11288	0.153254	-0.736557	0.461392	0.765937	252	340	320	290	429	No Change	810	834	779	977	945	948
Pgap1	581.88	-0.57715	0.156792	-3.68098	0.000232335	0.00768837	460	666	729	422	638	Down	1568	1483	1382	1714	1687	1601
Gm36955	25.947	-0.485337	0.433661	-1.11916	0.263071	0.60569	20	29	32	21	28	No Change	33	22	40	40	35	33
Gm19637	16.817	-0.552378	0.532913	-1.03653	0.299957	0.644949	15	17	21	12	19	No Change	19	15	16	27	32	32
Ankrd44	23.7392	0.462163	0.483215	0.956432	0.338854	0.677725	22	13	21	19	50	No Change	72	64	113	99	141	97
Gm37370	2.1748	-0.728818	1.53752	-0.474022	0.635484	NA	3	1	3	0	4	No Change	1	6	8	7	5	4
A130048G24Rik	5.95614	0.223369	0.877081	0.254673	0.798976	NA	6	3	6	7	8	No Change	6	6	19	8	16	18
Sf3b1	2683.97	0.000936626	0.103453	0.00905368	0.992776	0.997515	2119	2838	2454	2569	3751	No Change	5838	6759	5832	7237	7078	6905
Coq10b	51.3567	-0.562056	0.33993	-1.65345	0.09824	0.368182	37	59	68	31	65	No Change	202	196	220	265	280	201
Gm17971	7.48324	0.490859	0.778238	0.630732	0.528216	NA	4	9	5	10	11	No Change	15	8	13	15	16	13
Hspd1	2518.02	-0.250871	0.118148	-2.12336	0.0337239	0.203877	2031	2711	2682	2417	2816	No Change	6665	6217	7396	7824	9278	7312
Hspe1	590.405	-0.343773	0.13672	-2.51443	0.0119225	0.111262	468	707	613	508	682	No Change	1522	1402	1546	1720	1682	1660
Gm5147	6.1977	-0.0672989	0.863316	-0.0779539	0.937865	NA	8	5	4	6	8	No Change	2	1	3	5	3	3
Gm16581	120.897	-0.00962112	0.237176	-0.0405653	0.967642	0.990113	123	122	86	131	147	No Change	74	83	75	92	67	68
Mob4	192.937	-0.436626	0.189212	-2.3076	0.0210211	0.157254	149	239	210	159	214	No Change	625	667	708	735	767	666
Gm6822	3.34303	0.325012	1.19092	0.272907	0.784924	NA	5	1	2	3	6	No Change	0	0	0	0	0	0
Rftn2	5.14041	-0.915991	0.993799	-0.921706	0.356682	NA	4	11	3	3	5	No Change	10	13	7	13	9	13
Mars2	153.974	-0.323156	0.213458	-1.51391	0.130049	0.424606	137	137	184	136	176	No Change	410	462	459	522	568	488
Boll	10.6153	-0.706974	0.670066	-1.05508	0.291388	NA	8	15	12	8	10	No Change	24	26	29	41	34	37
Gm8292	352.027	0.2452	0.145988	1.67959	0.0930379	0.358482	285	332	284	386	523	No Change	195	341	313	494	369	413
Plcl1	3.75327	-0.777583	1.13357	-0.685958	0.49274	NA	6	3	3	3	3	No Change	4	1	4	4	5	0
Gm38056	6.9892	-0.671043	0.835378	-0.803281	0.421812	NA	10	5	7	5	7	No Change	0	0	1	1	0	0
Gm6644	75.188	0.123735	0.265533	0.465988	0.641224	0.868367	61	70	68	89	93	No Change	7	9	14	7	14	14
Gm28900	31.699	0.546073	0.447025	1.22157	0.22187	0.55509	32	31	10	43	47	No Change	0	0	0	0	0	0
Satb2	125.463	-0.474455	0.235161	-2.01757	0.0436356	0.236701	92	143	156	113	122	No Change	93	133	196	191	194	139
4930558J18Rik	23.6871	0.126886	0.456429	0.277996	0.781015	0.929552	14	28	22	20	40	No Change	46	50	63	59	48	75
1700066M21Rik	36.3974	-0.297575	0.366718	-0.811453	0.417105	0.73499	27	42	40	32	43	No Change	95	136	121	140	161	126
Tyw5	56.328	-0.581269	0.314012	-1.85111	0.0641541	0.291892	52	62	64	53	46	No Change	192	179	174	174	212	163
Maip1	66.8962	-0.627783	0.284897	-2.20355	0.0275562	0.182191	53	84	79	51	67	No Change	227	238	231	222	290	240
Spats2l	50.8764	-1.22681	0.339156	-3.61725	0.000297746	0.00928528	47	84	53	29	37	Down	75	62	25	32	27	31
Kctd18	88.9431	-0.0725473	0.241692	-0.300164	0.764052	0.923133	74	91	85	82	121	No Change	180	172	173	170	171	150
Sgo2a	939.889	0.124881	0.127055	0.982888	0.325663	0.667877	657	998	860	961	1363	No Change	1523	1803	2108	2402	2365	2295
Aox1	11.7442	-0.630567	0.651444	-0.967952	0.333068	NA	15	9	13	7	14	No Change	18	34	23	27	20	23
Aox3	9.6692	0.115156	0.7192	0.160117	0.872789	NA	10	4	11	12	11	No Change	9	18	40	24	45	32
Aox4	5.5363	0.210627	0.905734	0.232549	0.816112	NA	6	3	5	6	8	No Change	23	28	26	37	31	17
Gm37607	29.9968	0.214595	0.396716	0.540929	0.588557	0.838755	20	31	27	35	41	No Change	39	59	41	40	36	53
Bzw1	1743.31	-0.59475	0.134373	-4.4261	9.59517e-06	0.000761384	1396	2051	2133	1362	1751	Down	5620	5307	5382	5643	6857	5288
Clk1	604.472	0.0537188	0.139485	0.385122	0.700147	0.893067	492	582	565	542	928	No Change	1307	1564	1532	1907	1824	1800
Ppil3	125.467	0.15043	0.219784	0.684443	0.493695	0.786219	117	116	96	125	189	No Change	258	318	305	300	341	326
Nif3l1	185.768	0.124414	0.179467	0.693242	0.488158	0.782084	154	179	160	192	266	No Change	626	727	620	731	750	656
[truncated: 22,593 more rows]

## Sheet: Sheet_Legends
Sheet Name
sig_Genes		sig_genes_rescue_RNAseq		all_genes		rescue_RNA_seq_all_genes
[truncated: 20 more rows]
