# Supplementary material
Source: HighWire-hosted journal article supplement (doi:10.1101/rna.079569.122)
Supplement: Supplemental_Table_S4.xlsx [file Supplemental_Table_S4.xlsx]

## Sheet: Sheet1
GROUP 1								GROUP 2								GROUP 3
Downregulated genes; Hallmark Gene Sets								Downregulated genes; chemical and genetic perturbations								Downregulated genes; GO Biological process
Overlap Results								Overlap Results								Overlap Results
Collection(s):	H							Collection(s):	CGP							Collection(s):	GO:BP
# overlaps shown:	20							# overlaps shown:	20							# overlaps shown:	20
# genesets in collections:	50							# genesets in collections:	3399							# genesets in collections:	7763
# genes in comparison (n):	487							# genes in comparison (n):	487							# genes in comparison (n):	487
# genes in universe (N):	41014							# genes in universe (N):	41014							# genes in universe (N):	41014
Gene Set Name	# Genes in Gene Set (K)	Description	# Genes in Overlap (k)	k/K	p-value	FDR q-value		Gene Set Name	# Genes in Gene Set (K)	Description	# Genes in Overlap (k)	k/K	p-value	FDR q-value		Gene Set Name	# Genes in Gene Set (K)	Description	# Genes in Overlap (k)	k/K	p-value	FDR q-value
HALLMARK_EPITHELIAL_MESENCHYMAL_TRANSITION	200	Genes defining epithelial-mesenchymal transition, as in wound healing, fibrosis and metastasis.	24	0.12	3.29e-17	1.64e-15		PASINI_SUZ12_TARGETS_DN	316	Genes down-regulated in ES (embryonic stem cells) with defficient SUZ12 [GeneID=23512].	85	0.269	4.18e-90	1.42e-86		GOBP_TISSUE_DEVELOPMENT	1998	The process whose specific outcome is the progression of a tissue over time, from its formation to the mature structure. [ISBN:0471245208]	104	0.0521	7.69e-38	5.97e-34
HALLMARK_G2M_CHECKPOINT	200	Genes involved in the G2/M checkpoint, as in progression through the cell division cycle.	18	0.09	4.13e-11	1.03e-09		GRAESSMANN_APOPTOSIS_BY_DOXORUBICIN_DN	1774	Genes down-regulated in ME-A cells (breast cancer) undergoing apoptosis in response to doxorubicin [PubChem=31703].	103	0.0581	1.28e-41	2.18e-38		GOBP_EPITHELIUM_DEVELOPMENT	1211	The process whose specific outcome is the progression of an epithelium over time, from its formation to the mature structure. An epithelium is a tissue that covers the internal or external surfaces of an anatomical structure. [GOC:dph, GOC:mtg_lung]	74	0.0611	4.47e-31	1.73e-27
HALLMARK_MYC_TARGETS_V1	200	A subgroup of genes regulated by MYC - version 1 (v1).	14	0.07	1.46e-07	2.43e-06		MILI_PSEUDOPODIA_HAPTOTAXIS_UP	521	Transcripts enriched in pseudopodia of NIH/3T3 cells (fibroblast) in response to haptotactic migratory stimulus by fibronectin, FN1 [GeneID=2335].	59	0.1132	2.6e-39	2.94e-36		GOBP_CELL_ADHESION	1541	The attachment of a cell, either to another cell or to an underlying substrate such as the extracellular matrix, via cell adhesion molecules. [GOC:hb, GOC:pf]	80	0.0519	8.17e-29	2.12e-25
HALLMARK_UV_RESPONSE_DN	144	Genes down-regulated in response to ultraviolet (UV) radiation.	11	0.0764	1.34e-06	1.67e-05		GRYDER_PAX3FOXO1_ENHANCERS_IN_TADS	1009	Expressed genes (FPKM>1) associated with high-confidence PAX3-FOXO1 sites with enhancers in primary tumors and cell lines, restricted to those within topological domain boundaries	77	0.0763	6.28e-39	5.34e-36		GOBP_ANIMAL_ORGAN_MORPHOGENESIS	1058	Morphogenesis of an animal organ. An organ is defined as a tissue or set of tissues that work together to perform a specific function or functions. Morphogenesis is the process in which anatomical structures are generated and organized. Organs are commonly observed as visibly distinct structures, but may also exist as loosely associated clusters of cells that work together to perform a specific f…	66	0.0624	3.08e-28	5.98e-25
HALLMARK_APICAL_JUNCTION	200	Genes encoding components of apical junction complex.	12	0.06	5.6e-06	4.63e-05		DODD_NASOPHARYNGEAL_CARCINOMA_DN	1406	Genes down-regulated in nasopharyngeal carcinoma (NPC) compared to the normal tissue.	79	0.0562	9.99e-31	6.79e-28		GOBP_NEUROGENESIS	1669	Generation of cells within the nervous system. [GO_REF:0000021, GOC:cls, GOC:curators, GOC:dgh, GOC:dph, GOC:jid]	82	0.0491	6.33e-28	9.82e-25
HALLMARK_ESTROGEN_RESPONSE_EARLY	200	Genes defining early response to estrogen.	12	0.06	5.6e-06	4.63e-05		DACOSTA_UV_RESPONSE_VIA_ERCC3_DN	856	Genes down-regulated in fibroblasts expressing mutant forms of ERCC3 [GeneID=2071] after UV irradiation.	62	0.0724	4.42e-30	2.5e-27		GOBP_ANATOMICAL_STRUCTURE_FORMATION_INVOLVED_IN_MORPHOGENESIS	1244	The developmental process pertaining to the initial formation of an anatomical structure from unspecified parts. This process begins with the specific processes that contribute to the appearance of the discrete structure and ends when the structural rudiment is recognizable. An anatomical structure is any biological entity that occupies space and is distinguished from its surroundings. Anatomical…	69	0.0555	1.66e-26	2.15e-23
HALLMARK_COAGULATION	138	Genes encoding components of blood coagulation system; also up-regulated in platelets.	10	0.0725	6.48e-06	4.63e-05		CUI_TCF21_TARGETS_2_DN	849	All significantly down-regulated genes in kidney glomeruli isolated from TCF21 [Gene ID=6943] knockout mice.	59	0.0695	1.05e-27	4.81e-25		GOBP_TISSUE_MORPHOGENESIS	637	The process in which the anatomical structures of a tissue are generated and organized. [GOC:dph, GOC:jid]	50	0.0785	6.05e-26	6.71e-23
HALLMARK_ESTROGEN_RESPONSE_LATE	200	Genes defining late response to estrogen.	11	0.055	3.07e-05	0.000192		DUTERTRE_ESTRADIOL_RESPONSE_24HR_DN	504	Genes down-regulated in MCF7 cells (breast cancer) at 24 h of estradiol [PubChem=5757] treatment.	47	0.0933	1.13e-27	4.81e-25		GOBP_POSITIVE_REGULATION_OF_DEVELOPMENTAL_PROCESS	1388	Any process that activates or increases the rate or extent of development, the biological process whose specific outcome is the progression of an organism over time from an initial condition (e.g. a zygote, or a young adult) to a later condition (e.g. a multicellular animal or an aged adult). [GOC:ai]	71	0.0512	3.43e-25	3.33e-22
HALLMARK_TGF_BETA_SIGNALING	54	Genes up-regulated in response to TGFB1 [GeneID=7040].	6	0.1111	4.33e-05	0.000241		RODRIGUES_THYROID_CARCINOMA_ANAPLASTIC_UP	721	Genes up-regulated in anaplastic thyroid carcinoma (ATC) compared to normal thyroid tissue.	54	0.0749	5.7e-27	2.15e-24		GOBP_REGULATION_OF_ANATOMICAL_STRUCTURE_MORPHOGENESIS	988	Any process that modulates the frequency, rate or extent of anatomical structure morphogenesis. [GOC:mah]	60	0.0607	4.2e-25	3.62e-22
HALLMARK_IL2_STAT5_SIGNALING	199	Genes up-regulated by STAT5 in response to IL2 stimulation.	10	0.0503	0.000147	0.000698		JOHNSTONE_PARVB_TARGETS_3_DN	875	Genes down-regulated upon overexpression of PARVB [GeneID=29780] in MDA-MB-231 cells (breast cancer) cultured in 3D Matrigel only.	57	0.0651	2.23e-25	7.2e-23		GOBP_CIRCULATORY_SYSTEM_DEVELOPMENT	1211	The process whose specific outcome is the progression of the circulatory system over time, from its formation to the mature structure. The circulatory system is the organ system that passes nutrients (such as amino acids and electrolytes), gases, hormones, blood cells, etc. to and from cells in the body to help fight diseases and help stabilize body temperature and pH to maintain homeostasis. [GO…	66	0.0545	6.08e-25	4.72e-22
HALLMARK_KRAS_SIGNALING_UP	200	Genes up-regulated by KRAS activation.	10	0.05	0.000154	0.000698		KOINUMA_TARGETS_OF_SMAD2_OR_SMAD3	843	Genes with promoters occupied by SMAD2 or SMAD3 [GeneID=4087, 4088] in HaCaT cells (keratinocyte) according to a ChIP-chip analysis.	56	0.0664	2.33e-25	7.2e-23		GOBP_GENERATION_OF_NEURONS	1453	The process in which nerve cells are generated. This includes the production of neuroblasts and their differentiation into neurons. [GOC:nln]	72	0.0496	9.95e-25	7.02e-22
HALLMARK_ANDROGEN_RESPONSE	101	Genes defining response to androgens.	7	0.0693	0.00021	0.000874		MEISSNER_BRAIN_HCP_WITH_H3K4ME3_AND_H3K27ME3	1074	Genes with high-CpG-density promoters (HCP) bearing histone H3 dimethylation at K4 (H3K4me2) and trimethylation at K27 (H3K27me3) in brain.	62	0.0577	9.26e-25	2.62e-22		GOBP_TUBE_DEVELOPMENT	1155	The process whose specific outcome is the progression of a tube over time, from its initial formation to a mature structure. Epithelial and endothelial tubes transport gases, liquids and cells from one site to another and form the basic structure of many organs and tissues including lung and trachea, kidney, the mammary gland, the vascular system and the gastrointestinal and urinary-genital tract…	64	0.0554	1.39e-24	8.98e-22
HALLMARK_GLYCOLYSIS	200	Genes encoding proteins involved in glycolysis and gluconeogenesis.	9	0.045	0.000697	0.00249		DIAZ_CHRONIC_MYELOGENOUS_LEUKEMIA_UP	1399	Genes up-regulated in CD34+ [GeneID=947] cells isolated from bone marrow of CML (chronic myelogenous leukemia) patients, compared to those from normal donors.	70	0.05	2.75e-24	7.18e-22		GOBP_CELL_MOTILITY	1794	Any process involved in the controlled self-propelled movement of a cell that results in translocation of the cell from one place to another. [GOC:dgh, GOC:dph, GOC:isa_complete, GOC:mlg]	80	0.0446	1.58e-24	9.46e-22
HALLMARK_HYPOXIA	200	Genes up-regulated in response to low oxygen levels (hypoxia).	9	0.045	0.000697	0.00249		GEORGES_TARGETS_OF_MIR192_AND_MIR215	892	Genes down-regulated in HCT116 cells (colon cancer) by expression of MIR192 or MIR215 [GeneID=406967;406997] at 24 h.	56	0.0628	3.65e-24	8.86e-22		GOBP_POSITIVE_REGULATION_OF_SIGNALING	1758	Any process that activates, maintains or increases the frequency, rate or extent of a signaling process. [GOC:mtg_signal]	77	0.0438	3.94e-23	2.18e-20
HALLMARK_ALLOGRAFT_REJECTION	200	Genes up-regulated during transplant rejection.	8	0.04	0.00284	0.00835		LEE_BMP2_TARGETS_DN	897	Genes down-regulated in uterus upon knockout of BMP2 [GeneID=650].	55	0.0613	2.93e-23	6.64e-21		GOBP_REGULATION_OF_CELL_DIFFERENTIATION	1641	Any process that modulates the frequency, rate or extent of cell differentiation, the process in which relatively unspecialized cells acquire specialized structural and functional features. [GOC:go_curators]	74	0.0451	5.67e-23	2.93e-20
HALLMARK_E2F_TARGETS	200	Genes encoding cell cycle related targets of E2F transcription factors.	8	0.04	0.00284	0.00835		FLECHNER_BIOPSY_KIDNEY_TRANSPLANT_OK_VS_DONOR_UP	568	Genes up-regulated in kidney biopsies from patients with well functioning kidneys more than 1-year post transplant compared to the biopsies from normal living kidney donors.	44	0.0775	1.04e-22	2.09e-20		GOBP_CELL_MORPHOGENESIS	1019	The developmental process in which the size or shape of a cell is generated and organized. [GOC:clt, GOC:dph, GOC:go_curators, GOC:tb]	58	0.0569	6.76e-23	3.28e-20
HALLMARK_MYOGENESIS	200	Genes involved in development of skeletal muscle (myogenesis).	8	0.04	0.00284	0.00835		BENPORATH_ES_1	379	Set 'ES exp1': genes overexpressed in human embryonic stem cells according to 5 or more out of 20 profiling studies.	37	0.0976	1.09e-22	2.09e-20		GOBP_REGULATION_OF_MULTICELLULAR_ORGANISMAL_DEVELOPMENT	1471	Any process that modulates the frequency, rate or extent of multicellular organismal development. [GOC:obol]	69	0.0469	2.23e-22	1.02e-19
HALLMARK_APOPTOSIS	161	Genes mediating programmed cell death (apoptosis) by activation of caspases.	7	0.0435	0.00325	0.00902		WONG_ADULT_TISSUE_STEM_MODULE	722	The 'adult tissue stem' module: genes coordinately up-regulated in a compendium of adult tissue stem cells.	49	0.0679	1.11e-22	2.09e-20		GOBP_MORPHOGENESIS_OF_AN_EPITHELIUM	524	The process in which the anatomical structures of epithelia are generated and organized. An epithelium consists of closely packed cells arranged in one or more layers, that covers the outer surfaces of the body or lines any internal cavity or tube. [GOC:dph, GOC:jl, GOC:tb, ISBN:0198506732]	41	0.0782	2.16e-21	9.06e-19
HALLMARK_MITOTIC_SPINDLE	199	Genes important for mitotic spindle assembly.	7	0.0352	0.01	0.0245		REN_ALVEOLAR_RHABDOMYOSARCOMA_DN	407	Genes commonly down-regulated in human alveolar rhabdomyosarcoma (ARMS) and its mouse model overexpressing PAX3-FOXO1 [GeneID=5077;2308] fusion.	38	0.0934	1.4e-22	2.5e-20		GOBP_EMBRYO_DEVELOPMENT	1133	The process whose specific outcome is the progression of an embryo from its formation until the end of its embryonic life stage. The end of the embryonic stage is organism-specific. For example, for mammals, the process would begin with zygote formation and end with birth. For insects, the process would begin at zygote formation and end with larval hatching. For plant zygotic embryos, this would …	59	0.0521	2.22e-21	9.06e-19
HALLMARK_COMPLEMENT	200	Genes encoding components of the complement system, which is part of the innate immune system.	7	0.035	0.0103	0.0245		GRYDER_PAX3FOXO1_ENHANCERS_KO_DOWN	438	Expressed genes (FPKM>1) associated with high-confidence PAX3-FOXO1 sites with enhancers in primary tumors and cell lines, restricted to those within topological domain boundaries, which are downregulated by delta log2(FPKM) < -0.2	38	0.0868	1.85e-21	3.15e-19		GOBP_CENTRAL_NERVOUS_SYSTEM_DEVELOPMENT	1061	The process whose specific outcome is the progression of the central nervous system over time, from its formation to the mature structure. The central nervous system is the core nervous system that serves an integrating and coordinating function. In vertebrates it consists of the brain and spinal cord. In those invertebrates with a central nervous system it typically consists of a brain, cerebral…	57	0.0537	2.57e-21	9.99e-19
GROUP 4								GROUP 5								GROUP 6
Upregulated genes; Hallmark Gene Sets								Upregulated genes; chemical and genetic perturbations								Upregulated genes; GO Biological process
Overlap Results								Overlap Results								Overlap Results
Collection(s):	H							Collection(s):	CGP							Collection(s):	GO:BP
# overlaps shown:	20							# overlaps shown:	20							# overlaps shown:	20
# genesets in collections:	50							# genesets in collections:	3399							# genesets in collections:	7763
# genes in comparison (n):	367							# genes in comparison (n):	367							# genes in comparison (n):	367
# genes in universe (N):	41014							# genes in universe (N):	41014							# genes in universe (N):	41014
Gene Set Name	# Genes in Gene Set (K)	Description	# Genes in Overlap (k)	k/K	p-value	FDR q-value		Gene Set Name	# Genes in Gene Set (K)	Description	# Genes in Overlap (k)	k/K	p-value	FDR q-value		Gene Set Name	# Genes in Gene Set (K)	Description	# Genes in Overlap (k)	k/K	p-value	FDR q-value
HALLMARK_HYPOXIA	200	Genes up-regulated in response to low oxygen levels (hypoxia).	15	0.075	4.65e-10	2.33e-08		NIKOLSKY_BREAST_CANCER_17Q21_Q25_AMPLICON	334	Genes within amplicon 17q21-q25 identified in a copy number alterations study of 191 breast tumor samples.	32	0.0958	3.04e-23	1.03e-19		GOBP_CELL_CYCLE	1844	The progression of biochemical and morphological phases and events that occur in a cell during successive cell replication or nuclear replication events. Canonically, the cell cycle comprises the replication and segregation of genetic material followed by the division of the cell, but in endocycles or syncytial cells nuclear replication or nuclear division may not be followed by cell division. [G…	64	0.0347	1.13e-20	8.8e-17
HALLMARK_GLYCOLYSIS	200	Genes encoding proteins involved in glycolysis and gluconeogenesis.	14	0.07	4.34e-09	5.42e-08		PASINI_SUZ12_TARGETS_UP	112	Genes up-regulated in ES (embryonic stem cells) with defficient SUZ12 [GeneID=23512].	19	0.1696	5e-19	8.5e-16		GOBP_CELL_CYCLE_PROCESS	1275	The cellular process that ensures successive accurate and complete genome replication and chromosome segregation. [GOC:isa_complete, GOC:mtg_cell_cycle]	52	0.0408	8e-20	3.11e-16
HALLMARK_INTERFERON_GAMMA_RESPONSE	200	Genes up-regulated in response to IFNG [GeneID=3458].	14	0.07	4.34e-09	5.42e-08		KIM_ALL_DISORDERS_OLIGODENDROCYTE_NUMBER_CORR_UP	755	Genes whose expression was significantly and positively correlated with the number of perineuronal oligodendrocytes in the layer III of BA9 brain region.	38	0.0503	1.21e-17	1.37e-14		GOBP_CYTOSKELETON_ORGANIZATION	1519	A process that is carried out at the cellular level which results in the assembly, arrangement of constituent parts, or disassembly of cytoskeletal structures. [GOC:dph, GOC:jl, GOC:mah]	54	0.0355	6.11e-18	1.58e-14
HALLMARK_MTORC1_SIGNALING	200	Genes up-regulated through activation of mTORC1 complex.	14	0.07	4.34e-09	5.42e-08		HELLER_HDAC_TARGETS_UP	317	Genes up-regulated in at least one of three multiple myeloma (MM) cell lines by TSA [PubChem=5562].	26	0.082	2e-17	1.7e-14		GOBP_MONOCARBOXYLIC_ACID_METABOLIC_PROCESS	616	The chemical reactions and pathways involving monocarboxylic acids, any organic acid containing one carboxyl (COOH) group or anion (COO-). [GOC:vk]	32	0.0519	2.09e-15	4.05e-12
HALLMARK_E2F_TARGETS	200	Genes encoding cell cycle related targets of E2F transcription factors.	12	0.06	2.99e-07	2.49e-06		DELACROIX_RAR_BOUND_ES	465	Genes with DNA sequences bound by RARA and RARG [GeneID=5914, 5916] in ES cells.	30	0.0645	4.99e-17	3.39e-14		GOBP_SMALL_MOLECULE_METABOLIC_PROCESS	1848	The chemical reactions and pathways involving small molecules, any low molecular weight, monomeric, non-encoded molecule. [GOC:curators, GOC:pde, GOC:vw]	55	0.0298	5.77e-15	8.96e-12
HALLMARK_XENOBIOTIC_METABOLISM	200	Genes encoding proteins involved in processing of drugs and other xenobiotics.	12	0.06	2.99e-07	2.49e-06		GARY_CD5_TARGETS_UP	473	Genes up-regulated in Daudi cells (B lymphocytes) stably expressing CD5 [GeneID=921] off a plasmid vector.	30	0.0634	7.94e-17	4.5e-14		GOBP_LIPID_METABOLIC_PROCESS	1415	The chemical reactions and pathways involving lipids, compounds soluble in an organic solvent but not, or sparingly, in an aqueous solvent. Includes fatty acids; neutral fats, other fatty-acid esters, and soaps; long-chain (fatty) alcohols and waxes; sphingoids and other long-chain bases; glycolipids, phospholipids and sphingolipids; and carotenes, polyprenols, sterols, terpenes and other isopren…	47	0.0332	1.31e-14	1.7e-11
HALLMARK_APOPTOSIS	161	Genes mediating programmed cell death (apoptosis) by activation of caspases.	10	0.0621	2.14e-06	1.21e-05		LINDGREN_BLADDER_CANCER_CLUSTER_1_DN	378	Down-regulated genes whose expression profile is specific to Custer I of urothelial cell carcinoma (UCC) tumors.	27	0.0714	1.55e-16	7.52e-14		GOBP_REGULATION_OF_CELL_CYCLE_PROCESS	735	Any process that modulates a cellular process that is involved in the progression of biochemical and morphological phases and events that occur in a cell during successive cell replication or nuclear replication events. [GOC:dph, GOC:tb]	33	0.0449	4.63e-14	5.14e-11
HALLMARK_ADIPOGENESIS	200	Genes up-regulated during adipocyte differentiation (adipogenesis).	11	0.055	2.18e-06	1.21e-05		QI_HYPOXIA	133	Genes up-regulated by hypoxia in TRAMP-C cells (prostatic cancer).	17	0.1278	5.02e-15	2.13e-12		GOBP_ORGANIC_ACID_METABOLIC_PROCESS	966	The chemical reactions and pathways involving organic acids, any acidic compound containing carbon in covalent linkage. [ISBN:0198506732]	37	0.0383	1.61e-13	1.56e-10
HALLMARK_P53_PATHWAY	200	Genes involved in p53 pathways and networks.	11	0.055	2.18e-06	1.21e-05		KRIEG_HYPOXIA_NOT_VIA_KDM3A	746	Genes induced under hypoxia independently of KDM3A [GeneID=55818] in RCC4 cells (renal carcinoma) expressing VHL [GeneID=7428].	34	0.0456	1.22e-14	4.61e-12		GOBP_ORGANOPHOSPHATE_METABOLIC_PROCESS	1035	The chemical reactions and pathways involving organophosphates, any phosphate-containing organic compound. [ISBN:0198506732]	38	0.0367	2.7e-13	2.33e-10
HALLMARK_INTERFERON_ALPHA_RESPONSE	97	Genes up-regulated in response to alpha interferon proteins.	8	0.0825	2.75e-06	1.38e-05		NIKOLSKY_BREAST_CANCER_17Q11_Q21_AMPLICON	132	Genes within amplicon 17q11-q21 identified in a copy number alterations study of 191 breast tumor samples.	16	0.1212	7.5e-14	2.55e-11		GOBP_REGULATION_OF_CELL_CYCLE	1147	Any process that modulates the rate or extent of progression through the cell cycle. [GOC:ai, GOC:dph, GOC:tb]	40	0.0349	3.13e-13	2.33e-10
HALLMARK_APICAL_JUNCTION	200	Genes encoding components of apical junction complex.	10	0.05	1.45e-05	6.61e-05		GOBERT_OLIGODENDROCYTE_DIFFERENTIATION_UP	574	Genes up-regulated during later stage of differentiation of Oli-Neu cells (oligodendroglial precursor) in response to PD174265 [PubChem=4709].	29	0.0505	9.1e-14	2.66e-11		GOBP_CELLULAR_RESPONSE_TO_STRESS	1978	Any process that results in a change in state or activity of a cell (in terms of movement, secretion, enzyme production, gene expression, etc.) as a result of a stimulus indicating the organism is under stress. The stress is usually, but not necessarily, exogenous (e.g. temperature, humidity, ionizing radiation). [GOC:mah]	54	0.0273	3.31e-13	2.33e-10
HALLMARK_G2M_CHECKPOINT	200	Genes involved in the G2/M checkpoint, as in progression through the cell division cycle.	9	0.045	8.77e-05	0.000365		BLALOCK_ALZHEIMERS_DISEASE_UP	1671	Genes up-regulated in brain from patients with Alzheimer's disease.	50	0.0299	9.38e-14	2.66e-11		GOBP_CELLULAR_LIPID_METABOLIC_PROCESS	1014	The chemical reactions and pathways involving lipids, as carried out by individual cells. [GOC:jl]	37	0.0365	6.8e-13	4.4e-10
HALLMARK_ESTROGEN_RESPONSE_EARLY	200	Genes defining early response to estrogen.	8	0.04	0.000474	0.00169		FEVR_CTNNB1_TARGETS_UP	688	Genes up-regulated in intestinal crypt cells upon deletion of CTNNB1 [GeneID=1499].	31	0.0451	2.56e-13	6.69e-11		GOBP_REPRODUCTION	1501	The production of new individuals that contain some portion of genetic material inherited from one or more parent organisms. [GOC:go_curators, GOC:isa_complete, GOC:jl, ISBN:0198506732]	45	0.03	1.72e-12	1.03e-09
HALLMARK_MYC_TARGETS_V1	200	A subgroup of genes regulated by MYC - version 1 (v1).	8	0.04	0.000474	0.00169		MARTENS_BOUND_BY_PML_RARA_FUSION	456	Genes with promoters occupied by PML-RARA fusion [GeneID=5371,5914] protein in acute promyelocytic leukemia(APL) cells NB4 and two APL primary blasts, based on Chip-seq data.	25	0.0548	8.22e-13	1.99e-10		GOBP_ADP_METABOLIC_PROCESS	92	The chemical reactions and pathways involving ADP, adenosine 5'-diphosphate. [GOC:go_curators]	13	0.1413	2.25e-12	1.25e-09
HALLMARK_CHOLESTEROL_HOMEOSTASIS	74	Genes involved in cholesterol homeostasis.	5	0.0676	0.000542	0.00181		KIM_BIPOLAR_DISORDER_OLIGODENDROCYTE_DENSITY_CORR_UP	680	Genes whose expression significantly and positively correlated with oligodendrocyte density in layer VI of BA9 brain region in patients with bipolar disorder.	30	0.0441	1.07e-12	2.44e-10		GOBP_MICROTUBULE_CYTOSKELETON_ORGANIZATION	663	A process that is carried out at the cellular level which results in the assembly, arrangement of constituent parts, or disassembly of cytoskeletal structures comprising microtubules and their associated proteins. [GOC:mah]	29	0.0437	3.2e-12	1.66e-09
HALLMARK_UV_RESPONSE_UP	158	Genes up-regulated in response to ultraviolet (UV) radiation.	7	0.0443	0.000583	0.00182		STEIN_ESRRA_TARGETS_UP	385	Genes up-regulated by ESRRA [GeneID=2101] only.	23	0.0597	1.2e-12	2.54e-10		GOBP_REGULATION_OF_ORGANELLE_ORGANIZATION	1208	Any process that modulates the frequency, rate or extent of a process involved in the formation, arrangement of constituent parts, or disassembly of an organelle. [GOC:mah]	39	0.0323	6.57e-12	3.19e-09
HALLMARK_MITOTIC_SPINDLE	199	Genes important for mitotic spindle assembly.	7	0.0352	0.00221	0.00598		GRAESSMANN_APOPTOSIS_BY_DOXORUBICIN_UP	1151	Genes up-regulated in ME-A cells (breast cancer) undergoing apoptosis in response to doxorubicin [PubChem=31703].	39	0.0339	1.53e-12	3.05e-10		GOBP_RESPONSE_TO_OXYGEN_CONTAINING_COMPOUND	1695	Any process that results in a change in state or activity of a cell or an organism (in terms of movement, secretion, enzyme production, gene expression, etc.) as a result of an oxygen-containing compound stimulus. [GOC:pr, GOC:TermGenie]	47	0.0277	7.91e-12	3.61e-09
HALLMARK_MYOGENESIS	200	Genes involved in development of skeletal muscle (myogenesis).	7	0.035	0.00227	0.00598		DANG_BOUND_BY_MYC	1061	Genes whose promoters are bound by MYC [GeneID=4609], according to MYC Target Gene Database.	37	0.0349	2.57e-12	4.85e-10		GOBP_NUCLEOTIDE_PHOSPHORYLATION	102	The process of introducing one or more phosphate groups into a nucleotide to produce a phosphorylated nucleoside. [GOC:ai]	13	0.1275	8.71e-12	3.76e-09
HALLMARK_TNFA_SIGNALING_VIA_NFKB	200	Genes regulated by NF-kB in response to TNF [GeneID=7124].	7	0.035	0.00227	0.00598		STEIN_ESRRA_TARGETS	529	Genes regulated by ESRRA [GeneID=2101] in MCF-7 cells (breast cancer).	26	0.0491	3.35e-12	6e-10		GOBP_MICROTUBULE_BASED_PROCESS	946	Any cellular process that depends upon or alters the microtubule cytoskeleton, that part of the cytoskeleton comprising microtubules and their associated proteins. [GOC:mah]	34	0.0359	9.27e-12	3.79e-09
HALLMARK_BILE_ACID_METABOLISM	112	Genes involve in metabolism of bile acids and salts.	5	0.0446	0.00343	0.00857		PUJANA_BRCA1_PCC_NETWORK	1625	Genes constituting the BRCA1-PCC network of transcripts whose expression positively correlated (Pearson correlation coefficient, PCC >= 0.4) with that of BRCA1 [GeneID=672] across a compendium of normal tissues.	46	0.0283	6.74e-12	1.13e-09		GOBP_CARBOHYDRATE_CATABOLIC_PROCESS	155	The chemical reactions and pathways resulting in the breakdown of carbohydrates, any of a group of organic compounds based of the general formula Cx(H2O)y. [ISBN:0198506732]	15	0.0968	1.24e-11	4.83e-09

## Sheet: Top 10 Downregulated
Gene Set Name	# Genes in Gene Set (K)	Description	# Genes in Overlap (k)	k/K	p-value	FDR q-value
PASINI_SUZ12_TARGETS_DN	316	Genes down-regulated in ES (embryonic stem cells) with defficient SUZ12 [GeneID=23512].	85	0.269	4.18e-90	1.42e-86
GRAESSMANN_APOPTOSIS_BY_DOXORUBICIN_DN	1774	Genes down-regulated in ME-A cells (breast cancer) undergoing apoptosis in response to doxorubicin [PubChem=31703].	103	0.0581	1.28e-41	2.18e-38
MILI_PSEUDOPODIA_HAPTOTAXIS_UP	521	Transcripts enriched in pseudopodia of NIH/3T3 cells (fibroblast) in response to haptotactic migratory stimulus by fibronectin, FN1 [GeneID=2335].	59	0.1132	2.6e-39	2.94e-36
GRYDER_PAX3FOXO1_ENHANCERS_IN_TADS	1009	Expressed genes (FPKM>1) associated with high-confidence PAX3-FOXO1 sites with enhancers in primary tumors and cell lines, restricted to those within topological domain boundaries	77	0.0763	6.28e-39	5.34e-36
GOBP_TISSUE_DEVELOPMENT	1998	The process whose specific outcome is the progression of a tissue over time, from its formation to the mature structure. [ISBN:0471245208]	104	0.0521	7.69e-38	5.97e-34
DODD_NASOPHARYNGEAL_CARCINOMA_DN	1406	Genes down-regulated in nasopharyngeal carcinoma (NPC) compared to the normal tissue.	79	0.0562	9.99e-31	6.79e-28
GOBP_EPITHELIUM_DEVELOPMENT	1211	The process whose specific outcome is the progression of an epithelium over time, from its formation to the mature structure. An epithelium is a tissue that covers the internal or external surfaces of an anatomical structure. [GOC:dph, GOC:mtg_lung]	74	0.0611	4.47e-31	1.73e-27
DACOSTA_UV_RESPONSE_VIA_ERCC3_DN	856	Genes down-regulated in fibroblasts expressing mutant forms of ERCC3 [GeneID=2071] after UV irradiation.	62	0.0724	4.42e-30	2.5e-27
GOBP_CELL_ADHESION	1541	The attachment of a cell, either to another cell or to an underlying substrate such as the extracellular matrix, via cell adhesion molecules. [GOC:hb, GOC:pf]	80	0.0519	8.17e-29	2.12e-25
CUI_TCF21_TARGETS_2_DN	849	All significantly down-regulated genes in kidney glomeruli isolated from TCF21 [Gene ID=6943] knockout mice.	59	0.0695	1.05e-27	4.81e-25

## Sheet: Top 10 Upregulated
Gene Set Name	# Genes in Gene Set (K)	Description	# Genes in Overlap (k)	k/K	p-value	FDR q-value
NIKOLSKY_BREAST_CANCER_17Q21_Q25_AMPLICON	334	Genes within amplicon 17q21-q25 identified in a copy number alterations study of 191 breast tumor samples.	32	0.0958	3.04e-23	1.03e-19
GOBP_CELL_CYCLE	1844	The progression of biochemical and morphological phases and events that occur in a cell during successive cell replication or nuclear replication events. Canonically, the cell cycle comprises the replication and segregation of genetic material followed by the division of the cell, but in endocycles or syncytial cells nuclear replication or nuclear division may not be followed by cell division. [G…	64	0.0347	1.13e-20	8.8e-17
GOBP_CELL_CYCLE_PROCESS	1275	The cellular process that ensures successive accurate and complete genome replication and chromosome segregation. [GOC:isa_complete, GOC:mtg_cell_cycle]	52	0.0408	8e-20	3.11e-16
PASINI_SUZ12_TARGETS_UP	112	Genes up-regulated in ES (embryonic stem cells) with defficient SUZ12 [GeneID=23512].	19	0.1696	5e-19	8.5e-16
KIM_ALL_DISORDERS_OLIGODENDROCYTE_NUMBER_CORR_UP	755	Genes whose expression was significantly and positively correlated with the number of perineuronal oligodendrocytes in the layer III of BA9 brain region.	38	0.0503	1.21e-17	1.37e-14
GOBP_CYTOSKELETON_ORGANIZATION	1519	A process that is carried out at the cellular level which results in the assembly, arrangement of constituent parts, or disassembly of cytoskeletal structures. [GOC:dph, GOC:jl, GOC:mah]	54	0.0355	6.11e-18	1.58e-14
HELLER_HDAC_TARGETS_UP	317	Genes up-regulated in at least one of three multiple myeloma (MM) cell lines by TSA [PubChem=5562].	26	0.082	2e-17	1.7e-14
DELACROIX_RAR_BOUND_ES	465	Genes with DNA sequences bound by RARA and RARG [GeneID=5914, 5916] in ES cells.	30	0.0645	4.99e-17	3.39e-14
GARY_CD5_TARGETS_UP	473	Genes up-regulated in Daudi cells (B lymphocytes) stably expressing CD5 [GeneID=921] off a plasmid vector.	30	0.0634	7.94e-17	4.5e-14
LINDGREN_BLADDER_CANCER_CLUSTER_1_DN	378	Down-regulated genes whose expression profile is specific to Custer I of urothelial cell carcinoma (UCC) tumors.	27	0.0714	1.55e-16	7.52e-14

## Sheet: Sheet_Legends
Sheet
Sheet 1		Top 10 Downregulated		Top 10 Upregulated
Group	Description	Column	Description	Column	Description
1	Downregulated genes; Hallmark Gene Sets	A	Gene Set Name	A	Gene Set Name
2	Downregulated genes; chemical and genetic perturbations	B	# Genes in Gene Set (K)	B	# Genes in Gene Set (K)
3	Downregulated genes; GO Biological process	C	Description of Gene Set	C	Description of Gene Set
4	Upregulated genes; Hallmark Gene Sets	D	# Querey Genes in Overlap (k)	D	# Querey Genes in Overlap (k)
5	Upregulated genes; chemical and genetic perturbations	E	k/K (Col D/ Col B)	E	k/K (Col D/ Col B)
6	Upregulated genes; GO Biological process	F	p-value	F	p-value
		G	FDR q-value	G	FDR q-value
