# Supplementary material
Source: HighWire-hosted journal article supplement (doi:10.1101/rna.079569.122)
Supplement: Supplemental_Table_S5.xlsx [file Supplemental_Table_S5.xlsx]

## Sheet: Legend
Sheets 1-2, Figure 3D			Sheets 3-10, Figure 4D/E
Column	Column Header	Description	Column	Column Header	Description
A	gene_ID	Gencode Transcript ID and location	A	gene_ID	Gencode Transcript ID and location
B	Gene_Identifier	Gene name from column A (Gene_ID)	B	Gene_Identifier	Gene name from column A (Gene_ID)
C	length	length of transcript	C	length	length of transcript
D	eff_length	eff_length	D	eff_length	length of transcript as determined by kallisto
E	total_tpm	transcript expression level in wild type cells, as in Figure 3D, bottom panel	E	tpm_fl_safb_rep1	tpm of SAFB-FL-WT in dko13 rep 1
F	safb1_rpm	SAFB signal per transcript	F	tpm_fl_safb_rep2	tpm of SAFB-FL-WT in dko13 rep 2
G	safb1_rpm_over_ctrl	SAFB signal per transcript over DKO signal, as in Figure 3D top panel	G	tpm_dd3del_rep1	tpm of safb∆dd3 in dko13 rep 1
H	Reg	Whether gene was up- or down- regulated, or unchanged upon safb1/2 dko	H	tpm_dd3del_rep2	tpm of safb∆dd3 in dko13 rep 2
I	Category	Whether transcript annotation is spliced or unspliced	I	tpm_gfp_rep1	tpm of gfp in dko13 rep 1
			J	tpm_gfp_rep2	tpm of gfp in dko13 rep 2
			K	fl.av.tpm	average tpm of rep1 and rep2 of columns
			L	av.fl1	SAFB-FL-WT in dko13 rep 1 normalized to average tpm of rep1 and rep2 of columns
			M	av.fl2	SAFB-FL-WT in dko13 rep 2
			N	av.dd3.1	safb∆dd3 in dko13 rep 1 normalized to average tpm
			O	av.dd3.2	safb∆dd3 in dko13 rep 2 normalized to average tpm
			P	av.gfp1	gfp in dko13 rep 1 normalized to average tpm
			Q	av.gfp2	gfp in dko13 rep 2 normalized to average tpm

## Sheet: 1_Spliced_SAFB_IP
gene_ID	Gene_Identifier	length	eff_length	total_tpm	safb1_rpm	safb1_rpm_over_ctrl	Reg	Category
0610009B22Rik_chr11_51685386_51688874(-)_transcript=ENSMUST00000007921.8	0610009B22Rik	813	613.994	19.6857	0	0	No Change High Expression	spliced
0610010F05Rik_chr11_23564961_23633639(-)_transcript=ENSMUST00000180260.7	0610010F05Rik	4128	3928.99	7.6732	0.00349198	-0.00027099	Down	spliced
0610012G03Rik_chr16_31947050_31948494(-)_transcript=ENSMUST00000202722.1	0610012G03Rik	1445	1245.99	4.25961	0	0	No Change Medium Expression	spliced
0610030E20Rik_chr6_72347317_72353148(+)_transcript=ENSMUST00000077783.4	0610030E20Rik	4605	4405.99	5.40133	20.6349	12.3774	No Change Medium Expression	spliced
0610040B10Rik_chr5_143329247_143332704(+)_transcript=ENSMUST00000160231.1	0610040B10Rik	501	301.994	0.755197	0	0	No Change Low Expression	spliced
0610040J01Rik_chr5_63812363_63899625(+)_transcript=ENSMUST00000081747.7	0610040J01Rik	2008	1808.99	0.461603	0	0	No Change Low Expression	spliced
0610043K17Rik_chr4_101353783_101399181(+)_transcript=ENSMUST00000123107.7	0610043K17Rik	614	414.994	0.700225	0.389594	0.297743	No Change Low Expression	spliced
1110002J07Rik_chr10_66912489_66920258(-)_transcript=ENSMUST00000181710.2	1110002J07Rik	2229	2029.99	0.511846	0.172757	0.172757	No Change Low Expression	spliced
1110002L01Rik_chr12_3403878_3427011(-)_transcript=ENSMUST00000168012.2	1110002L01Rik	3569	3369.99	5.57674	0.0441788	0.0240635	No Change Medium Expression	spliced
1110004F10Rik_chr7_116039397_116105210(+)_transcript=ENSMUST00000032899.11	1110004F10Rik	1479	1279.99	61.7993	0	0	No Change High Expression	spliced
1110006O24Rik_chr5_115631049_115631816(-)_transcript=ENSMUST00000201728.1	1110006O24Rik	768	568.994	0.29117	0	0	No Change Low Expression	spliced
1110008P14Rik_chr2_32377097_32381938(-)_transcript=ENSMUST00000048792.4	1110008P14Rik	680	480.994	18.2393	0	-0.030697	No Change High Expression	spliced
1110012L19Rik_chrX_70385877_70389417(+)_transcript=ENSMUST00000053981.5	1110012L19Rik	1094	894.994	8.97297	0	0	No Change Medium Expression	spliced
1110018N20Rik_chr2_167188702_167192808(+)_transcript=ENSMUST00000147446.1	1110018N20Rik	1162	962.994	0.452052	0	0	No Change Low Expression	spliced
1110019D14Rik_chr6_13871526_14044385(+)_transcript=ENSMUST00000181225.1	1110019D14Rik	1499	1299.99	1.10691	0	0	No Change Medium Expression	spliced
1110025M09Rik_chr15_81584174_81585028(-)_transcript=ENSMUST00000192082.1	1110025M09Rik	855	655.994	1.6416	0	0	No Change Medium Expression	spliced
1110032A03Rik_chr9_50762828_50775520(-)_transcript=ENSMUST00000042576.10	1110032A03Rik	1015	815.994	1.2137	0	0	No Change Medium Expression	spliced
1110032F04Rik_chr3_68869586_68872163(+)_transcript=ENSMUST00000054551.2	1110032F04Rik	2578	2378.99	0.400432	0	0	No Change Low Expression	spliced
1110038B12Rik_chr17_34950238_34952471(-)_transcript=ENSMUST00000174714.7	1110038B12Rik	520	320.994	68.7418	0	0	No Change High Expression	spliced
1110038F14Rik_chr15_76948506_76950979(+)_transcript=ENSMUST00000071792.6	1110038F14Rik	1043	843.994	14.3757	0	0	No Change Medium Expression	spliced
1110046J04Rik_chr13_33935567_33960181(+)_transcript=ENSMUST00000180906.1	1110046J04Rik	2776	2576.99	0.32686	0	0	No Change Low Expression	spliced
1110051M20Rik_chr2_91275068_91444704(-)_transcript=ENSMUST00000094835.8	1110051M20Rik	1498	1298.99	2.42036	0.0287928	-0.0122573	No Change Medium Expression	spliced
1110059E24Rik_chr19_21581202_21652976(-)_transcript=ENSMUST00000038830.9	1110059E24Rik	1614	1414.99	21.2411	0	0	No Change High Expression	spliced
1110059G10Rik_chr9_122945089_122951000(-)_transcript=ENSMUST00000118422.1	1110059G10Rik	723	523.994	3.63379	0	0	No Change Medium Expression	spliced
1110065P20Rik_chr4_124849080_124851196(-)_transcript=ENSMUST00000163946.1	1110065P20Rik	762	562.994	7.8368	0	0	No Change Medium Expression	spliced
1190005I06Rik_chr8_120608602_120647632(-)_transcript=ENSMUST00000123927.7	1190005I06Rik	844	644.994	9.02678	0	-0.030697	No Change Medium Expression	spliced
1190007I07Rik_chr10_82619851_82623228(-)_transcript=ENSMUST00000079648.11	1190007I07Rik	716	516.994	5.14248	0	0	No Change Medium Expression	spliced
1300002E11Rik_chr16_21794318_21809040(+)_transcript=ENSMUST00000211443.1	1300002E11Rik	767	567.994	4.46987	0	0	No Change Medium Expression	spliced
1300014J16Rik_chr12_80115863_80117199(+)_transcript=ENSMUST00000219015.1	1300014J16Rik	1337	1137.99	0.36396	0.167958	0.15261	No Change Low Expression	spliced
1500002C15Rik_chr4_155732545_155734727(-)_transcript=ENSMUST00000178987.2	1500002C15Rik	2183	1983.99	0.250516	0.105574	0.0978997	No Change Low Expression	spliced
1500004A13Rik_chr3_88782943_88832547(-)_transcript=ENSMUST00000183707.1	1500004A13Rik	6054	5854.99	1.83375	0.503554	0.444718	No Change Medium Expression	spliced
1500009L16Rik_chr10_83722865_83762762(+)_transcript=ENSMUST00000150459.2	1500009L16Rik	1194	994.994	31.3818	0	0	No Change High Expression	spliced
1500011B03Rik_chr5_114808196_114823468(-)_transcript=ENSMUST00000100850.5	1500011B03Rik	420	220.995	8.31494	0	0	No Change Medium Expression	spliced
1500015A07Rik_chr18_61726390_61735917(+)_transcript=ENSMUST00000184181.1	1500015A07Rik	1865	1665.99	1.8851	1.49236	0.862931	No Change Medium Expression	spliced
1600012H06Rik_chr17_14943184_14959570(+)_transcript=ENSMUST00000174004.1	1600012H06Rik	1466	1266.99	6.23306	5.11203	2.77885	No Change Medium Expression	spliced
1600014C10Rik_chr7_38183217_38197568(+)_transcript=ENSMUST00000179525.7	1600014C10Rik	2326	2126.99	1.08163	0	0	No Change Medium Expression	spliced
1600020E01Rik_chr6_86526247_86582466(+)_transcript=ENSMUST00000205028.1	1600020E01Rik	329	130.694	9.03089	0	-0.0460456	No Change Medium Expression	spliced
1600023N17Rik_chr5_45668702_45669708(-)_transcript=ENSMUST00000196242.1	1600023N17Rik	1007	807.994	0.410087	0	0	No Change Low Expression	spliced
1700001L05Rik_chr15_83353847_83367282(-)_transcript=ENSMUST00000100370.1	1700001L05Rik	2270	2070.99	3.53086	0	0	Up	spliced
1700001O22Rik_chr2_30794769_30803661(-)_transcript=ENSMUST00000050003.8	1700001O22Rik	1672	1472.99	0.160385	0	0	No Change Low Expression	spliced
1700003M07Rik_chr4_129960374_129963657(+)_transcript=ENSMUST00000139884.1	1700003M07Rik	541	341.994	0.424659	0	0	No Change Low Expression	spliced
1700007K13Rik_chr2_28462001_28466332(-)_transcript=ENSMUST00000086370.10	1700007K13Rik	812	612.994	10.1781	0	0	No Change Medium Expression	spliced
1700007L15Rik_chr16_33379854_33380727(-)_transcript=ENSMUST00000180923.1	1700007L15Rik	737	537.994	0.649634	0	0	No Change Low Expression	spliced
1700008J07Rik_chr7_127510438_127512869(-)_transcript=ENSMUST00000185351.1	1700008J07Rik	2432	2232.99	1.92903	2.91767	1.60537	No Change Medium Expression	spliced
1700008O03Rik_chr7_44360043_44385820(-)_transcript=ENSMUST00000107933.7	1700008O03Rik	913	713.994	2.45742	0.00959761	0.00959761	No Change Medium Expression	spliced
1700010I14Rik_chr17_8988333_9011949(+)_transcript=ENSMUST00000151609.1	1700010I14Rik	1853	1653.99	0.368794	0	0	No Change Low Expression	spliced
1700013H16Rik_chrX_53742901_53757831(-)_transcript=ENSMUST00000067940.2	1700013H16Rik	1224	1024.99	0.242451	0	0	No Change Low Expression	spliced
1700016K19Rik_chr11_75999912_76003569(+)_transcript=ENSMUST00000066408.5	1700016K19Rik	921	721.994	0.917868	0	0	No Change Low Expression	spliced
1700017B05Rik_chr9_57253117_57262612(-)_transcript=ENSMUST00000034846.6	1700017B05Rik	4152	3952.99	23.9882	0	0	No Change High Expression	spliced
1700019A02Rik_chr1_53158577_53187636(-)_transcript=ENSMUST00000072235.9	1700019A02Rik	646	446.994	3.32139	0	0	No Change Medium Expression	spliced
1700019D03Rik_chr1_52922324_53020179(-)_transcript=ENSMUST00000050567.10	1700019D03Rik	3641	3441.99	12.4036	1.05962	0.391486	No Change Medium Expression	spliced
1700019E08Rik_chr2_45696605_45698447(+)_transcript=ENSMUST00000134308.1	1700019E08Rik	424	224.994	1.06405	0	0	No Change Medium Expression	spliced
1700019L13Rik_chr9_119983146_119988092(+)_transcript=ENSMUST00000217388.1	1700019L13Rik	1646	1446.99	0.157653	0	0	No Change Low Expression	spliced
1700022N22Rik_chr17_25985808_25991030(+)_transcript=ENSMUST00000235322.1	1700022N22Rik	760	560.994	0.404211	0	0	No Change Low Expression	spliced
1700023H06Rik_chr13_80884224_80885524(-)_transcript=ENSMUST00000161006.1	1700023H06Rik	1044	844.994	0.461938	0	0	No Change Low Expression	spliced
1700025G04Rik_chr1_151852403_152090125(-)_transcript=ENSMUST00000044581.13	1700025G04Rik	9559	9359.99	2.16745	1.30333	0.7411	No Change Medium Expression	spliced
1700026N04Rik_chr13_47106419_47109519(+)_transcript=ENSMUST00000224610.1	1700026N04Rik	643	443.994	0.282889	0	0	No Change Low Expression	spliced
1700028B04Rik_chr7_28492550_28497713(+)_transcript=ENSMUST00000190841.1	1700028B04Rik	971	771.994	0.343134	0	0	No Change Low Expression	spliced
1700028E10Rik_chr5_151368675_151432118(+)_transcript=ENSMUST00000181114.5	1700028E10Rik	2034	1834.99	0.167325	0	0	No Change Low Expression	spliced
1700028I16Rik_chr10_82812123_82824242(+)_transcript=ENSMUST00000076984.7	1700028I16Rik	1048	848.994	2.69269	0.00812573	-0.0686169	No Change Medium Expression	spliced
1700028J19Rik_chr7_44229811_44246695(-)_transcript=ENSMUST00000237383.1	1700028J19Rik	1306	1106.99	0.148612	0	0	No Change Low Expression	spliced
1700029J07Rik_chr8_45953606_45975440(-)_transcript=ENSMUST00000095323.7	1700029J07Rik	2740	2540.99	1.01256	0	0	No Change Medium Expression	spliced
1700029P11Rik_chr15_81980540_81981563(+)_transcript=ENSMUST00000074608.3	1700029P11Rik	1024	824.994	4.71923	0	0	No Change Medium Expression	spliced
1700030C10Rik_chr12_20804381_20815779(-)_transcript=ENSMUST00000189625.1	1700030C10Rik	1735	1535.99	11.4184	0	0	No Change Medium Expression	spliced
1700030J22Rik_chr8_116969594_116978959(-)_transcript=ENSMUST00000070577.6	1700030J22Rik	2976	2776.99	1.64202	0	0	No Change Medium Expression	spliced
1700030K09Rik_chr8_72443880_72461001(+)_transcript=ENSMUST00000064853.12	1700030K09Rik	2887	2687.99	3.16017	2.09412	2.09412	No Change Medium Expression	spliced
1700034P13Rik_chr1_9747648_9791924(+)_transcript=ENSMUST00000189431.1	1700034P13Rik	555	355.994	0.131867	0	0	No Change Low Expression	spliced
1700037C18Rik_chr16_3895179_3908689(-)_transcript=ENSMUST00000115859.7	1700037C18Rik	2592	2392.99	0.148538	0	0	No Change Low Expression	spliced
1700037H04Rik_chr2_131146324_131160081(-)_transcript=ENSMUST00000103188.9	1700037H04Rik	1241	1041.99	32.6567	0	0	No Change High Expression	spliced
1700052K11Rik_chr11_105177726_105181433(-)_transcript=ENSMUST00000190120.1	1700052K11Rik	3708	3508.99	0.731818	2.74972	1.59858	No Change Low Expression	spliced
1700055D18Rik_chr4_45011687_45015406(+)_transcript=ENSMUST00000186030.1	1700055D18Rik	3720	3520.99	0.2003	0	0	No Change Low Expression	spliced
1700056N10Rik_chr16_17047520_17049111(+)_transcript=ENSMUST00000141875.1	1700056N10Rik	1043	843.994	1.7256	4.031	2.46545	No Change Medium Expression	spliced
1700066M21Rik_chr1_57377620_57385423(+)_transcript=ENSMUST00000042734.2	1700066M21Rik	3008	2808.99	2.66293	0	0	No Change Medium Expression	spliced
1700067K01Rik_chr8_84001502_84004770(+)_transcript=ENSMUST00000060357.14	1700067K01Rik	1291	1091.99	0.480726	0	0	No Change Low Expression	spliced
1700086P04Rik_chr4_129050097_129057983(-)_transcript=ENSMUST00000149472.2	1700086P04Rik	1009	809.994	0.137161	0	0	No Change Low Expression	spliced
1700094D03Rik_chr3_90062796_90068347(+)_transcript=ENSMUST00000029551.2	1700094D03Rik	3097	2897.99	2.33542	0	0	No Change Medium Expression	spliced
1700094J05Rik_chr10_76389015_76401507(+)_transcript=ENSMUST00000190491.1	1700094J05Rik	997	797.994	0.488416	0	0	No Change Low Expression	spliced
1700096K18Rik_chr5_25530013_25531466(+)_transcript=ENSMUST00000188465.1	1700096K18Rik	1454	1254.99	1.55114	0	0	No Change Medium Expression	spliced
1700097N02Rik_chr17_30622441_30626905(-)_transcript=ENSMUST00000188852.1	1700097N02Rik	845	645.994	5.84374	0	0	No Change Medium Expression	spliced
1700102P08Rik_chr9_108392805_108410934(+)_transcript=ENSMUST00000035234.5	1700102P08Rik	1101	901.994	0.883865	0	0	No Change Low Expression	spliced
1700105P06Rik_chr19_7382537_7383561(+)_transcript=ENSMUST00000186160.2	1700105P06Rik	1025	825.994	0.702013	0.230343	0.1536	No Change Low Expression	spliced
1700108F19Rik_chr14_76672963_76687169(+)_transcript=ENSMUST00000189375.1	1700108F19Rik	494	294.994	2.98495	0	0	No Change Medium Expression	spliced
1700109H08Rik_chr5_3571566_3584356(+)_transcript=ENSMUST00000008451.11	1700109H08Rik	773	573.994	0.794966	0	-0.0153485	No Change Low Expression	spliced
1700113A16Rik_chr3_88171556_88177785(-)_transcript=ENSMUST00000200006.1	1700113A16Rik	563	363.994	0.561229	0	0	No Change Low Expression	spliced
1700123J17Rik_chr7_126224247_126248238(-)_transcript=ENSMUST00000206035.1	1700123J17Rik	1805	1605.99	0.149724	0	0	No Change Low Expression	spliced
1700123O20Rik_chr14_54686216_54690741(+)_transcript=ENSMUST00000227269.1	1700123O20Rik	893	693.994	12.573	0	0	No Change Medium Expression	spliced
1700124L16Rik_chr6_83761756_83762865(-)_transcript=ENSMUST00000190077.1	1700124L16Rik	1110	910.994	0.220311	0.163159	0.147811	No Change Low Expression	spliced
1810008B01Rik_chr8_124305132_124306507(-)_transcript=ENSMUST00000162325.1	1810008B01Rik	829	629.994	0.262977	0	0	No Change Low Expression	spliced
1810010H24Rik_chr11_107025681_107030443(+)_transcript=ENSMUST00000106767.2	1810010H24Rik	1100	900.994	0.830418	0	0	No Change Low Expression	spliced
1810013L24Rik_chr16_8830100_8858922(+)_transcript=ENSMUST00000023150.6	1810013L24Rik	4072	3872.99	14.3564	0	0	No Change Medium Expression	spliced
1810014B01Rik_chr10_86685525_86694806(+)_transcript=ENSMUST00000218095.1	1810014B01Rik	1622	1422.99	1.57267	0	0	No Change Medium Expression	spliced
1810014P07Rik_chr17_29717072_29719153(+)_transcript=ENSMUST00000234637.1	1810014P07Rik	2082	1882.99	0.220364	0.129568	0.121894	No Change Low Expression	spliced
1810019D21Rik_chr8_106135400_106138525(+)_transcript=ENSMUST00000145343.1	1810019D21Rik	984	784.994	0.654739	0	0	No Change Low Expression	spliced
1810019N24Rik_chr7_12948592_12961768(-)_transcript=ENSMUST00000181128.1	1810019N24Rik	1474	1274.99	0.824605	0	0	No Change Low Expression	spliced
1810026B05Rik_chr7_73539801_73558395(-)_transcript=ENSMUST00000190028.6	1810026B05Rik	590	390.994	17.0915	0	0	Down	spliced
1810030O07Rik_chrX_12654879_12673668(-)_transcript=ENSMUST00000060108.6	1810030O07Rik	2699	2499.99	14.831	13.3067	7.58724	No Change Medium Expression	spliced
1810037I17Rik_chr3_122924203_122926184(+)_transcript=ENSMUST00000106429.5	1810037I17Rik	1160	960.994	52.7095	0	0	No Change High Expression	spliced
1810044D09Rik_chr6_91440987_91441755(+)_transcript=ENSMUST00000186472.1	1810044D09Rik	486	286.994	2.01638	0	0	No Change Medium Expression	spliced
1810055G02Rik_chr19_3708293_3717881(+)_transcript=ENSMUST00000235295.1	1810055G02Rik	1643	1443.99	11.6221	0	0	No Change Medium Expression	spliced
1810058I24Rik_chr6_35252654_35263496(+)_transcript=ENSMUST00000130875.7	1810058I24Rik	690	490.994	46.2493	0	0	No Change High Expression	spliced
2010001A14Rik_chr11_57795499_57801417(-)_transcript=ENSMUST00000152790.7	2010001A14Rik	714	514.994	1.44437	0	0	No Change Medium Expression	spliced
2010008C14Rik_chr6_125083437_125084029(+)_transcript=ENSMUST00000203956.1	2010008C14Rik	593	393.994	0.315374	0	0	No Change Low Expression	spliced
2010110E17Rik_chr8_86885688_86886566(+)_transcript=ENSMUST00000184161.1	2010110E17Rik	879	679.994	0.670011	0	0	No Change Low Expression	spliced
2010110K18Rik_chr18_34751809_34758685(+)_transcript=ENSMUST00000181453.2	2010110K18Rik	2398	2198.99	0.489817	0	0	No Change Low Expression	spliced
2010204K13Rik_chrX_7411817_7445143(-)_transcript=ENSMUST00000150671.1	2010204K13Rik	885	685.994	6.6282	0.00959761	0.00959761	No Change Medium Expression	spliced
2010300C02Rik_chr1_37611677_37720085(-)_transcript=ENSMUST00000162875.7	2010300C02Rik	4634	4434.99	0.537724	0	0	No Change Low Expression	spliced
2010309G21Rik_chr16_19051367_19106749(+)_transcript=ENSMUST00000198927.1	2010309G21Rik	458	258.994	1.60375	0.0472009	-0.0141932	No Change Medium Expression	spliced
2010315B03Rik_chr9_124291804_124312696(-)_transcript=ENSMUST00000177714.7	2010315B03Rik	2623	2423.99	0.465566	0	0	No Change Low Expression	spliced
2010320M18Rik_chr8_70776815_70777823(+)_transcript=ENSMUST00000191396.1	2010320M18Rik	1009	809.994	3.17033	0	0	No Change Medium Expression	spliced
2200002D01Rik_chr7_29246561_29248466(-)_transcript=ENSMUST00000032808.5	2200002D01Rik	1466	1266.99	3.06699	2.35193	1.51821	No Change Medium Expression	spliced
2210016F16Rik_chr13_58379817_58385225(-)_transcript=ENSMUST00000022032.6	2210016F16Rik	3051	2851.99	5.45784	0.668236	0.20778	No Change Medium Expression	spliced
2210016L21Rik_chr5_114942158_114949783(+)_transcript=ENSMUST00000031538.8	2210016L21Rik	2607	2407.99	9.89228	19.3425	12.5953	No Change Medium Expression	spliced
2210408I21Rik_chr13_77135540_77613784(+)_transcript=ENSMUST00000225605.1	2210408I21Rik	1539	1339.99	2.48708	1.69828	1.13793	Down	spliced
2210409E12Rik_chr11_88972657_88973002(+)_transcript=ENSMUST00000122062.1	2210409E12Rik	346	147.267	22.9841	0	0	No Change High Expression	spliced
2210412B16Rik_chr5_130131327_130131824(+)_transcript=ENSMUST00000201281.1	2210412B16Rik	498	298.994	0.585439	0.133699	0.121575	No Change Low Expression	spliced
2210418O10Rik_chr2_176226569_176240328(+)_transcript=ENSMUST00000099009.8	2210418O10Rik	3823	3623.99	9.02152	2.12408	1.12862	No Change Medium Expression	spliced
2300009A05Rik_chr9_63394447_63399246(-)_transcript=ENSMUST00000168665.2	2300009A05Rik	595	395.994	2.02244	0	0	No Change Medium Expression	spliced
2310002F09Rik_chr7_43695209_43797958(-)_transcript=ENSMUST00000181551.2	2310002F09Rik	2468	2268.99	0.25796	0	0	No Change Low Expression	spliced
2310009B15Rik_chr1_138851983_138856852(-)_transcript=ENSMUST00000112025.2	2310009B15Rik	565	365.994	5.89292	0	0	No Change Medium Expression	spliced
2310010J17Rik_chr7_90124822_90129984(-)_transcript=ENSMUST00000181189.2	2310010J17Rik	490	290.994	5.86498	0	0	No Change Medium Expression	spliced
2310011J03Rik_chr10_80318254_80320537(-)_transcript=ENSMUST00000020341.8	2310011J03Rik	1649	1449.99	9.07803	0	0	No Change Medium Expression	spliced
2310015A10Rik_chr12_80120546_80132844(-)_transcript=ENSMUST00000180643.2	2310015A10Rik	1399	1199.99	0.703614	0	-0.0342174	No Change Low Expression	spliced
2310022A10Rik_chr7_27553233_27582099(+)_transcript=ENSMUST00000067386.13	2310022A10Rik	2701	2501.99	18.5568	0	0	No Change High Expression	spliced
2310022B05Rik_chr8_124635756_124663369(-)_transcript=ENSMUST00000034464.7	2310022B05Rik	3307	3107.99	20.5815	0	0	No Change High Expression	spliced
2310030G06Rik_chr9_50739691_50746536(-)_transcript=ENSMUST00000034564.3	2310030G06Rik	1257	1057.99	4.45362	1.89445	1.89445	No Change Medium Expression	spliced
2310033P09Rik_chr11_59208321_59210738(+)_transcript=ENSMUST00000020719.6	2310033P09Rik	1285	1085.99	12.5096	4.62055	2.14026	No Change Medium Expression	spliced
2310039H08Rik_chr17_46772635_46773396(+)_transcript=ENSMUST00000071430.6	2310039H08Rik	762	562.994	2.94273	0	0	No Change Medium Expression	spliced
2310039L15Rik_chr10_95336276_95366202(+)_transcript=ENSMUST00000220058.1	2310039L15Rik	727	527.994	0.278377	0	0	No Change Low Expression	spliced
2310040G24Rik_chr6_86483376_86488227(-)_transcript=ENSMUST00000189386.1	2310040G24Rik	775	575.994	2.62854	0	-0.0110117	No Change Medium Expression	spliced
2310043M15Rik_chr16_93792136_93794901(-)_transcript=ENSMUST00000180967.2	2310043M15Rik	1580	1380.99	2.8714	0.0191952	0.0191952	No Change Medium Expression	spliced
2310047D07Rik_chr5_149231332_149237984(+)_transcript=ENSMUST00000189493.1	2310047D07Rik	735	535.994	0.450352	0	0	No Change Low Expression	spliced
2310057M21Rik_chr7_131338220_131362759(-)_transcript=ENSMUST00000059438.10	2310057M21Rik	6773	6573.99	4.17677	0.300624	0.300624	Down	spliced
2310058D17Rik_chr11_58965748_58978050(-)_transcript=ENSMUST00000131221.1	2310058D17Rik	3201	3001.99	0.155391	0.0619344	0.0619344	No Change Low Expression	spliced
2310061I04Rik_chr17_35892677_35897431(-)_transcript=ENSMUST00000148482.7	2310061I04Rik	1193	993.994	18.1918	0	0	No Change High Expression	spliced
2310068J16Rik_chr15_99972158_99973287(-)_transcript=ENSMUST00000188271.2	2310068J16Rik	1130	930.994	0.978746	0	0	No Change Low Expression	spliced
2400006E01Rik_chr3_41521247_41528474(-)_transcript=ENSMUST00000199633.1	2400006E01Rik	643	443.994	11.0583	0	0	No Change Medium Expression	spliced
2410002F23Rik_chr7_44246722_44252319(+)_transcript=ENSMUST00000055858.13	2410002F23Rik	1982	1782.99	13.0256	0.00959761	0.00959761	No Change Medium Expression	spliced
2410003I16Rik_chr16_94011441_94012236(+)_transcript=ENSMUST00000231382.1	2410003I16Rik	452	252.994	5.7395	0	0	No Change Medium Expression	spliced
2410003L11Rik_chr11_97598511_97622893(+)_transcript=ENSMUST00000145262.1	2410003L11Rik	642	442.994	6.99568	2.16223	0.77694	No Change Medium Expression	spliced
2410004B18Rik_chr3_145938014_145944829(+)_transcript=ENSMUST00000039571.13	2410004B18Rik	1547	1347.99	10.0156	0	0	No Change Medium Expression	spliced
2410004P03Rik_chr12_17003319_17011727(-)_transcript=ENSMUST00000190691.1	2410004P03Rik	953	753.994	0.165455	0	0	No Change Low Expression	spliced
2410006H16Rik_chr11_62602877_62604807(+)_transcript=ENSMUST00000131787.1	2410006H16Rik	462	262.994	152.411	0	0	Up	spliced
2410017I17Rik_chr17_36145018_36163176(+)_transcript=ENSMUST00000056774.15	2410017I17Rik	1509	1309.99	0.552092	0	0	No Change Low Expression	spliced
2410018L13Rik_chr12_22953997_23010284(-)_transcript=ENSMUST00000149246.7	2410018L13Rik	3370	3170.99	1.85862	0	0	No Change Medium Expression	spliced
2410021H03Rik_chr17_69275362_69277208(-)_transcript=ENSMUST00000187090.1	2410021H03Rik	764	564.994	1.10931	0	0	No Change Medium Expression	spliced
2410022M11Rik_chr14_56811989_56813899(+)_transcript=ENSMUST00000186474.2	2410022M11Rik	1911	1711.99	0.677407	0	0	No Change Low Expression	spliced
2410024N13Rik_chr3_103198226_103198975(-)_transcript=ENSMUST00000090704.4	2410024N13Rik	669	469.994	0.352502	0	0	No Change Low Expression	spliced
2410080I02Rik_chr19_23134900_23135717(+)_transcript=ENSMUST00000142712.1	2410080I02Rik	414	214.996	0.39202	0	0	No Change Low Expression	spliced
2410124H12Rik_chr16_92478742_92497366(+)_transcript=ENSMUST00000160494.2	2410124H12Rik	706	506.994	0.344065	0	0	No Change Low Expression	spliced
2410131K14Rik_chr5_118245227_118266093(+)_transcript=ENSMUST00000049138.7	2410131K14Rik	5649	5449.99	3.34445	0	0	No Change Medium Expression	spliced
2410141K09Rik_chr13_66418114_66441118(-)_transcript=ENSMUST00000172579.3	2410141K09Rik	2587	2387.99	22.7894	0	0	No Change High Expression	spliced
2500002B13Rik_chr8_57488054_57508877(+)_transcript=ENSMUST00000210752.1	2500002B13Rik	298	101.93	30.9422	0	0	No Change High Expression	spliced
2510002D24Rik_chr16_18836578_18840160(+)_transcript=ENSMUST00000055413.12	2510002D24Rik	1281	1081.99	3.60348	0	-0.0460456	No Change Medium Expression	spliced
2510016D11Rik_chr5_120552055_120553039(-)_transcript=ENSMUST00000201971.1	2510016D11Rik	985	785.994	0.523093	0.398087	0.314009	No Change Low Expression	spliced
2510017J16Rik_chr5_3585112_3586374(+)_transcript=ENSMUST00000198718.1	2510017J16Rik	1263	1063.99	1.82959	0.777407	0.631596	No Change Medium Expression	spliced
2510039O18Rik_chr4_147940895_147947314(+)_transcript=ENSMUST00000103232.1	2510039O18Rik	2731	2531.99	14.4207	0	0	No Change Medium Expression	spliced
2510046G10Rik_chr7_126648543_126649594(-)_transcript=ENSMUST00000187458.1	2510046G10Rik	1052	852.994	0.534122	0	0	No Change Low Expression	spliced
2600002D14Rik_chr16_36862450_36862741(+)_transcript=ENSMUST00000231824.1	2600002D14Rik	292	96.7163	0.136277	0.0579556	0.0579556	No Change Low Expression	spliced
2610001J05Rik_chr6_13867735_13871518(-)_transcript=ENSMUST00000155856.1	2610001J05Rik	1077	877.994	5.82331	0	0	No Change Medium Expression	spliced
2610002M06Rik_chrX_107782751_107816334(-)_transcript=ENSMUST00000120722.1	2610002M06Rik	5842	5642.99	2.00931	0.0479881	0.0172911	No Change Medium Expression	spliced
2610005L07Rik_chr8_20385782_20424814(-)_transcript=ENSMUST00000139264.1	2610005L07Rik	948	748.994	53.6466	0	0	No Change High Expression	spliced
2610008E11Rik_chr10_79064374_79097600(-)_transcript=ENSMUST00000039271.6	2610008E11Rik	4229	4029.99	9.51882	0	0	No Change Medium Expression	spliced
2610011E03Rik_chr5_131996179_131998413(-)_transcript=ENSMUST00000200128.1	2610011E03Rik	2235	2035.99	0.136878	0.0834619	0.0617401	No Change Low Expression	spliced
2610017A05Rik_chr6_148831452_148833112(+)_transcript=ENSMUST00000204670.1	2610017A05Rik	1661	1461.99	0.141651	0	0	No Change Low Expression	spliced
2610021A01Rik_chr7_41599230_41628533(+)_transcript=ENSMUST00000163475.2	2610021A01Rik	4004	3804.99	34.8523	0.124769	0.045613	No Change High Expression	spliced
2610024D14Rik_chr11_21099534_21099827(+)_transcript=ENSMUST00000121233.1	2610024D14Rik	294	98.4381	0.635894	0	0	No Change Low Expression	spliced
2610028D06Rik_chr9_45797348_45799060(-)_transcript=ENSMUST00000215216.1	2610028D06Rik	1713	1513.99	0.871332	0	0	No Change Low Expression	spliced
2610035D17Rik_chr11_113043895_113201838(-)_transcript=ENSMUST00000127263.7	2610035D17Rik	1861	1661.99	0.198814	0	0	No Change Low Expression	spliced
2610035F20Rik_chr14_122470284_122475199(-)_transcript=ENSMUST00000177306.1	2610035F20Rik	1149	949.994	0.147062	0.0372053	-0.0276565	No Change Low Expression	spliced
2610037D02Rik_chr15_96134819_96284495(-)_transcript=ENSMUST00000185067.1	2610037D02Rik	2997	2797.99	6.67297	0.646795	0.469203	No Change Medium Expression	spliced
2610044O15Rik8_chr8_129216354_129234406(-)_transcript=ENSMUST00000186619.6	2610044O15Rik8	2337	2137.99	10.202	10.6191	8.13595	No Change Medium Expression	spliced
2610301B20Rik_chr4_10874498_10899425(+)_transcript=ENSMUST00000080517.13	2610301B20Rik	2116	1916.99	4.15813	0	0	No Change Medium Expression	spliced
2610306M01Rik_chr6_86848399_86849440(-)_transcript=ENSMUST00000185414.1	2610306M01Rik	1042	842.994	0.736989	0	0	No Change Low Expression	spliced
2610307P16Rik_chr13_28460034_28885620(-)_transcript=ENSMUST00000148885.7	2610307P16Rik	1870	1670.99	7.91271	0.181554	0.037638	Down	spliced
2610318N02Rik_chr16_17113398_17125167(-)_transcript=ENSMUST00000231681.1	2610318N02Rik	1156	956.994	38.7126	0.0479881	0.0326396	No Change High Expression	spliced
2610507B11Rik_chr11_78261752_78290623(+)_transcript=ENSMUST00000010421.6	2610507B11Rik	7443	7243.99	92.7725	0	-0.030697	No Change High Expression	spliced
2610507I01Rik_chr11_59199836_59202385(-)_transcript=ENSMUST00000154354.1	2610507I01Rik	1360	1160.99	0.375337	0	0	No Change Low Expression	spliced
2610509F24Rik_chr9_118402465_118403302(-)_transcript=ENSMUST00000193035.1	2610509F24Rik	838	638.994	3.11128	0	0	No Change Medium Expression	spliced
2610528J11Rik_chr4_118526999_118530228(+)_transcript=ENSMUST00000030261.5	2610528J11Rik	958	758.994	5.89358	0.00959761	0.00959761	No Change Medium Expression	spliced
2700029L08Rik_chr5_134519325_134520789(-)_transcript=ENSMUST00000202895.1	2700029L08Rik	1465	1265.99	0.141585	0	0	No Change Low Expression	spliced
2700038G22Rik_chr5_23850597_23855038(+)_transcript=ENSMUST00000181574.5	2700038G22Rik	1375	1175.99	6.27217	16.2863	11.8506	No Change Medium Expression	spliced
2700049A03Rik_chr12_71136848_71243303(+)_transcript=ENSMUST00000149564.7	2700049A03Rik	5763	5563.99	9.72158	0.0850335	0.0850335	No Change Medium Expression	spliced
2700062C07Rik_chr18_24470850_24477798(+)_transcript=ENSMUST00000097646.4	2700062C07Rik	1065	865.994	18.2879	0.791161	0.377759	No Change High Expression	spliced
2700078F05Rik_chr1_181950132_181953375(-)_transcript=ENSMUST00000194331.1	2700078F05Rik	3244	3044.99	2.59469	0	0	No Change Medium Expression	spliced
2700081O15Rik_chr19_7417625_7425904(+)_transcript=ENSMUST00000159348.2	2700081O15Rik	4989	4789.99	6.17981	0	0	Down	spliced
2700097O09Rik_chr12_55045661_55080110(-)_transcript=ENSMUST00000021406.5	2700097O09Rik	1105	905.994	12.5058	0	0	No Change Medium Expression	spliced
2700099C18Rik_chr17_94750100_94775132(+)_transcript=ENSMUST00000182402.7	2700099C18Rik	1275	1075.99	12.2273	4.62589	2.56042	No Change Medium Expression	spliced
2810001G20Rik_chr11_64079484_64083259(+)_transcript=ENSMUST00000146333.1	2810001G20Rik	959	759.994	1.75452	0.472112	0.333975	No Change Medium Expression	spliced
2810002D19Rik_chr2_94406151_94411682(+)_transcript=ENSMUST00000152313.1	2810002D19Rik	2040	1840.99	2.07596	0	0	No Change Medium Expression	spliced
2810004N23Rik_chr8_124836945_124863120(-)_transcript=ENSMUST00000034465.8	2810004N23Rik	2340	2140.99	60.9432	27.1153	14.5846	No Change High Expression	spliced
2810006K23Rik_chr5_124328089_124341844(+)_transcript=ENSMUST00000077376.2	2810006K23Rik	1677	1477.99	8.17068	0	-0.0153485	No Change Medium Expression	spliced
2810013P06Rik_chr8_123042466_123044602(+)_transcript=ENSMUST00000186531.1	2810013P06Rik	2137	1937.99	4.40324	0	0	No Change Medium Expression	spliced
2810021J22Rik_chr11_58867216_58883288(+)_transcript=ENSMUST00000073924.9	2810021J22Rik	3866	3666.99	3.58388	0	0	No Change Medium Expression	spliced
2810025M15Rik_chr1_157412352_157420236(+)_transcript=ENSMUST00000061537.11	2810025M15Rik	1194	994.994	33.6788	0	0	No Change High Expression	spliced
2810039B14Rik_chr15_75642129_75653643(+)_transcript=ENSMUST00000183928.7	2810039B14Rik	1459	1259.99	0.287601	0	0	No Change Low Expression	spliced
2810402E24Rik_chr14_20641009_20644048(+)_transcript=ENSMUST00000190699.1	2810402E24Rik	3040	2840.99	0.88931	2.50495	1.7913	No Change Low Expression	spliced
2810403D21Rik_chrX_108833800_108974906(+)_transcript=ENSMUST00000152089.1	2810403D21Rik	852	652.994	0.690014	0	0	No Change Low Expression	spliced
2810405F17Rik_chr4_137387266_137388382(-)_transcript=ENSMUST00000189334.1	2810405F17Rik	1117	917.994	0.812132	0	0	No Change Low Expression	spliced
2810408A11Rik_chr11_69897352_69900987(-)_transcript=ENSMUST00000018714.12	2810408A11Rik	1485	1285.99	3.05279	0	0	Up	spliced
2810408I11Rik_chr1_64679871_64690659(-)_transcript=ENSMUST00000150749.1	2810408I11Rik	711	511.994	3.61749	0	-0.030697	No Change Medium Expression	spliced
2810428J06Rik_chr3_135425237_135427932(-)_transcript=ENSMUST00000198336.1	2810428J06Rik	2696	2496.99	0.265397	0	0	No Change Low Expression	spliced
2810429I04Rik_chr13_3478230_3501393(+)_transcript=ENSMUST00000181708.1	2810429I04Rik	4769	4569.99	2.66855	2.10027	1.25072	No Change Medium Expression	spliced
2810454H06Rik_chr6_134897961_134901108(+)_transcript=ENSMUST00000189942.1	2810454H06Rik	3148	2948.99	0.238764	0.637775	0.399873	No Change Low Expression	spliced
2810455O05Rik_chr8_123838553_123840785(-)_transcript=ENSMUST00000138442.1	2810455O05Rik	1691	1491.99	2.01187	0	0	No Change Medium Expression	spliced
2810459M11Rik_chr1_86045863_86055456(+)_transcript=ENSMUST00000165824.2	2810459M11Rik	3331	3131.99	0.302801	0	0	No Change Low Expression	spliced
2900022M07Rik_chr1_25808956_25809972(-)_transcript=ENSMUST00000193912.1	2900022M07Rik	1017	817.994	0.425327	0.686314	0.602649	No Change Low Expression	spliced
2900026A02Rik_chr5_113086323_113221236(-)_transcript=ENSMUST00000211733.1	2900026A02Rik	10238	10039	7.57038	0.0287928	0.0287928	No Change Medium Expression	spliced
2900041M22Rik_chr11_117611247_117613857(+)_transcript=ENSMUST00000155384.1	2900041M22Rik	1784	1584.99	1.15415	0	0	No Change Medium Expression	spliced
2900052L18Rik_chr11_120229802_120231585(-)_transcript=ENSMUST00000139014.1	2900052L18Rik	1588	1388.99	10.4808	0	0	No Change Medium Expression	spliced
2900076A07Rik_chr7_81523550_81531498(+)_transcript=ENSMUST00000180879.7	2900076A07Rik	725	525.994	0.662351	0	0	No Change Low Expression	spliced
2900092N22Rik_chr2_14673404_14674812(+)_transcript=ENSMUST00000193601.1	2900092N22Rik	1409	1209.99	0.292684	0.301738	0.295492	No Change Low Expression	spliced
2900093K20Rik_chr2_163419795_163420361(+)_transcript=ENSMUST00000190930.1	2900093K20Rik	567	367.994	1.23807	0	0	No Change Medium Expression	spliced
2900097C17Rik_chr2_156388065_156392979(-)_transcript=ENSMUST00000192863.2	2900097C17Rik	4915	4715.99	28.0717	0	0	Down	spliced
3000002C10Rik_chr9_109827943_109832706(-)_transcript=ENSMUST00000133495.2	3000002C10Rik	1008	808.994	1.16953	1.00569	0.747009	No Change Medium Expression	spliced
3010003L21Rik_chr6_148944867_148947129(+)_transcript=ENSMUST00000047953.9	3010003L21Rik	1729	1529.99	0.285311	0	-0.0153485	No Change Low Expression	spliced
3110001I22Rik_chr16_13671929_13678388(+)_transcript=ENSMUST00000035426.6	3110001I22Rik	1611	1411.99	6.50317	12.2913	8.58379	No Change Medium Expression	spliced
3110009E18Rik_chr1_120121187_120188189(+)_transcript=ENSMUST00000112644.8	3110009E18Rik	488	288.994	4.75513	0.00425339	0.00425339	No Change Medium Expression	spliced
3110021N24Rik_chr4_108719649_108781904(+)_transcript=ENSMUST00000178992.1	3110021N24Rik	1812	1612.99	0.38827	0	0	No Change Low Expression	spliced
3110040N11Rik_chr7_81782182_81789478(-)_transcript=ENSMUST00000026092.8	3110040N11Rik	887	687.994	8.6907	4.0944	2.58657	No Change Medium Expression	spliced
3110045C21Rik_chr1_169969409_169972396(+)_transcript=ENSMUST00000180638.2	3110045C21Rik	1135	935.994	0.793793	0	0	No Change Low Expression	spliced
3110053B16Rik_chr12_20874125_20921262(-)_transcript=ENSMUST00000140360.7	3110053B16Rik	2004	1804.99	1.08706	0.0133925	-0.0023209	No Change Medium Expression	spliced
3110056K07Rik_chr12_70991615_71015832(-)_transcript=ENSMUST00000136690.2	3110056K07Rik	1063	863.994	1.2423	0	0	No Change Medium Expression	spliced
3110070M22Rik_chr13_119487252_119488384(-)_transcript=ENSMUST00000238285.1	3110070M22Rik	1133	933.994	0.709529	0	0	No Change Low Expression	spliced
3110082I17Rik_chr5_139359739_139460527(-)_transcript=ENSMUST00000066052.11	3110082I17Rik	1429	1229.99	22.7702	0.355217	-0.289562	No Change High Expression	spliced
3222401L13Rik_chr18_37655451_37661742(+)_transcript=ENSMUST00000192137.1	3222401L13Rik	6292	6092.99	0.544722	0.563835	0.387232	No Change Low Expression	spliced
3300002I08Rik_chr2_150310935_150362765(-)_transcript=ENSMUST00000051153.5	3300002I08Rik	650	450.994	1.54004	0	0	No Change Medium Expression	spliced
3300002P13Rik_chr7_3421665_3423445(-)_transcript=ENSMUST00000204020.1	3300002P13Rik	1092	892.994	0.742105	0	0	No Change Low Expression	spliced
3830406C13Rik_chr14_12284173_12303231(+)_transcript=ENSMUST00000225294.1	3830406C13Rik	1191	991.994	1.50482	0	0	No Change Medium Expression	spliced
3830408C21Rik_chr13_107022553_107055497(+)_transcript=ENSMUST00000225489.1	3830408C21Rik	1810	1610.99	1.11824	0	0	No Change Medium Expression	spliced
3830417A13Rik_chrX_64173548_64178778(+)_transcript=ENSMUST00000033522.14	3830417A13Rik	1649	1449.99	1.7519	0	0	No Change Medium Expression	spliced
3830432H09Rik_chr1_119529480_119536165(-)_transcript=ENSMUST00000188909.1	3830432H09Rik	2414	2214.99	0.193962	0	0	No Change Low Expression	spliced
4632404H12Rik_chr3_89767511_89773240(-)_transcript=ENSMUST00000195940.1	4632404H12Rik	4671	4471.99	1.06812	0	0	No Change Medium Expression	spliced
4632411P08Rik_chr5_29378699_29390488(+)_transcript=ENSMUST00000181005.1	4632411P08Rik	3237	3037.99	0.295814	0	0	No Change Low Expression	spliced
4632415L05Rik_chr3_19894886_19901033(+)_transcript=ENSMUST00000198527.2	4632415L05Rik	6148	5948.99	1.11752	0.836369	0.622365	No Change Medium Expression	spliced
4632418H02Rik_chr9_122127294_122130014(+)_transcript=ENSMUST00000217287.1	4632418H02Rik	2721	2521.99	0.169204	0	0	No Change Low Expression	spliced
4633401B06Rik_chr3_121787500_121788572(-)_transcript=ENSMUST00000198169.1	4633401B06Rik	1073	873.994	0.507121	0	0	No Change Low Expression	spliced
4731419I09Rik_chr3_89337850_89347831(+)_transcript=ENSMUST00000180791.1	4731419I09Rik	2820	2620.99	0.190209	0	0	No Change Low Expression	spliced
4732416N19Rik_chr6_148212253_148215731(+)_transcript=ENSMUST00000203932.1	4732416N19Rik	3479	3279.99	0.378828	0.379106	0.271666	No Change Low Expression	spliced
4732440D04Rik_chr1_6209866_6215293(-)_transcript=ENSMUST00000191825.1	4732440D04Rik	5428	5228.99	0.412063	1.29093	0.946856	No Change Low Expression	spliced
4732471J01Rik_chr7_25376819_25566417(+)_transcript=ENSMUST00000206300.1	4732471J01Rik	1887	1687.99	1.3418	0.0383904	0.0383904	No Change Medium Expression	spliced
4732496C06Rik_chr7_116546865_116549364(+)_transcript=ENSMUST00000206533.1	4732496C06Rik	2500	2300.99	0.342005	0.0671833	0.0671833	No Change Low Expression	spliced
4833407H14Rik_chr19_53460622_53462723(+)_transcript=ENSMUST00000180442.2	4833407H14Rik	1494	1294.99	1.12975	3.31715	2.35539	No Change Medium Expression	spliced
4833412K13Rik_chr1_78465448_78466926(-)_transcript=ENSMUST00000195509.1	4833412K13Rik	1479	1279.99	1.06948	0	0	No Change Medium Expression	spliced
4833413G10Rik_chr5_3629777_3631722(-)_transcript=ENSMUST00000199632.1	4833413G10Rik	1946	1746.99	0.521585	0.225544	0.202521	No Change Low Expression	spliced
4833417C18Rik_chr11_95858865_95861044(+)_transcript=ENSMUST00000146868.1	4833417C18Rik	1269	1069.99	4.2751	0	0	No Change Medium Expression	spliced
4833420G17Rik_chr13_119462768_119486120(+)_transcript=ENSMUST00000026519.9	4833420G17Rik	2565	2365.99	16.1782	0	0	No Change High Expression	spliced
4833421G17Rik_chr1_87865073_87865916(+)_transcript=ENSMUST00000191704.1	4833421G17Rik	844	644.994	0.255366	0	0	No Change Low Expression	spliced
4833438C02Rik_chr19_46303591_46305611(-)_transcript=ENSMUST00000235942.1	4833438C02Rik	1764	1564.99	0.688105	0.587324	0.265005	No Change Low Expression	spliced
4833439L19Rik_chr13_54551218_54565435(-)_transcript=ENSMUST00000026989.14	4833439L19Rik	2727	2527.99	33.1469	0	0	No Change High Expression	spliced
4833445I07Rik_chr9_108567533_108569174(+)_transcript=ENSMUST00000193193.1	4833445I07Rik	1642	1442.99	1.06202	0.729596	0.407277	No Change Medium Expression	spliced
4921507P07Rik_chr6_50573302_50596632(-)_transcript=ENSMUST00000031852.4	4921507P07Rik	2378	2178.99	0.489683	0	0	No Change Low Expression	spliced
4921508M14Rik_chr12_34873730_34874828(-)_transcript=ENSMUST00000061679.2	4921508M14Rik	1099	899.994	0.153776	0	0	No Change Low Expression	spliced
4921514A10Rik_chr4_141115660_141118087(+)_transcript=ENSMUST00000181450.1	4921514A10Rik	2114	1914.99	0.130192	0	0	No Change Low Expression	spliced
4921524J17Rik_chr8_85408759_85432833(-)_transcript=ENSMUST00000047749.6	4921524J17Rik	1587	1387.99	24.7145	0	0	No Change High Expression	spliced
4921531C22Rik_chr2_179975993_179979013(+)_transcript=ENSMUST00000150145.1	4921531C22Rik	1905	1705.99	1.16257	0	0	No Change Medium Expression	spliced
4921536K21Rik_chr11_3886088_3895098(-)_transcript=ENSMUST00000020712.4	4921536K21Rik	2590	2390.99	0.153715	0	0	No Change Low Expression	spliced
4930402H24Rik_chr2_130706200_130906406(-)_transcript=ENSMUST00000044766.14	4930402H24Rik	6628	6428.99	2.57809	0	0	No Change Medium Expression	spliced
4930405N21Rik_chr5_113320454_113321653(-)_transcript=ENSMUST00000199950.1	4930405N21Rik	1200	1000.99	1.15857	0	0	No Change Medium Expression	spliced
4930415O20Rik_chr15_98571004_98589580(+)_transcript=ENSMUST00000023728.7	4930415O20Rik	558	358.994	1.14018	0	0	No Change Medium Expression	spliced
4930423D22Rik_chr12_81781358_81783031(+)_transcript=ENSMUST00000221909.1	4930423D22Rik	1674	1474.99	0.168483	0	0	No Change Low Expression	spliced
4930430F08Rik_chr10_100572265_100590423(-)_transcript=ENSMUST00000054471.9	4930430F08Rik	2564	2364.99	5.153	0	0	No Change Medium Expression	spliced
4930432K21Rik_chr8_84148025_84172590(+)_transcript=ENSMUST00000118856.7	4930432K21Rik	2366	2166.99	4.1639	0.039296	0.0239475	No Change Medium Expression	spliced
4930444P10Rik_chr1_16065979_16093325(-)_transcript=ENSMUST00000151004.1	4930444P10Rik	1001	801.994	0.504294	0	0	No Change Low Expression	spliced
4930445E18Rik_chr15_25285802_25332659(-)_transcript=ENSMUST00000228450.1	4930445E18Rik	868	668.994	0.400007	0	0	No Change Low Expression	spliced
4930447C04Rik_chr12_72881109_72940774(-)_transcript=ENSMUST00000110489.8	4930447C04Rik	1988	1788.99	8.96074	0.143803	-0.2199	No Change Medium Expression	spliced
4930447F24Rik_chr9_108133718_108138567(+)_transcript=ENSMUST00000194140.1	4930447F24Rik	1341	1141.99	0.44071	0	0	No Change Low Expression	spliced
4930451G09Rik_chr16_4964289_4978962(+)_transcript=ENSMUST00000229669.1	4930451G09Rik	1460	1260.99	0.369157	0.798435	0.612239	No Change Low Expression	spliced
4930452B06Rik_chr14_8431192_8666240(-)_transcript=ENSMUST00000102996.3	4930452B06Rik	2681	2481.99	7.13081	0.321108	-0.074385	No Change Medium Expression	spliced
4930453N24Rik_chr16_64751751_64771161(-)_transcript=ENSMUST00000076991.6	4930453N24Rik	5522	5322.99	15.5516	21.3509	15.8722	Down	spliced
4930461G14Rik_chr9_58455122_58469635(+)_transcript=ENSMUST00000181967.2	4930461G14Rik	843	643.994	5.15955	0.0479881	-0.0013694	No Change Medium Expression	spliced
4930465K10Rik_chr18_77714210_77715449(+)_transcript=ENSMUST00000056675.8	4930465K10Rik	1238	1038.99	0.51561	0	0	No Change Low Expression	spliced
4930466K18Rik_chr10_53614369_53615274(+)_transcript=ENSMUST00000219458.1	4930466K18Rik	906	706.994	0.585839	0.4031	0.364729	No Change Low Expression	spliced
4930481B07Rik_chr3_95015625_95020138(+)_transcript=ENSMUST00000128160.1	4930481B07Rik	1089	889.994	1.08023	0	0	No Change Medium Expression	spliced
4930500F10Rik_chr9_106247960_106249413(+)_transcript=ENSMUST00000180701.2	4930500F10Rik	1224	1024.99	0.727353	0.0329684	0.0329684	No Change Low Expression	spliced
4930503L19Rik_chr18_70452212_70472509(-)_transcript=ENSMUST00000067556.3	4930503L19Rik	2291	2091.99	11.4896	0	-0.0733082	No Change Medium Expression	spliced
4930509H03Rik_chr3_104510099_104511313(-)_transcript=ENSMUST00000196088.1	4930509H03Rik	1215	1015.99	0.511871	0	0	No Change Low Expression	spliced
4930512J16Rik_chr6_89269511_89285725(-)_transcript=ENSMUST00000203704.1	4930512J16Rik	1859	1659.99	0.136136	0.109622	0.109622	No Change Low Expression	spliced
4930513N10Rik_chr8_95806744_95821728(+)_transcript=ENSMUST00000145562.7	4930513N10Rik	2803	2603.99	1.2228	3.88622	2.45881	No Change Medium Expression	spliced
4930517E14Rik_chr9_31278021_31280992(-)_transcript=ENSMUST00000214795.1	4930517E14Rik	2972	2772.99	0.298727	0	0	No Change Low Expression	spliced
4930518I15Rik_chr2_156856616_156858212(-)_transcript=ENSMUST00000238678.1	4930518I15Rik	1597	1397.99	0.819818	0	0	No Change Low Expression	spliced
4930519F09Rik_chr10_28880921_28923507(-)_transcript=ENSMUST00000159347.1	4930519F09Rik	618	418.994	0.171853	0	0	No Change Low Expression	spliced
4930519F16Rik_chrX_103182971_103311782(-)_transcript=ENSMUST00000127012.8	4930519F16Rik	685	485.994	12.0135	0.00959761	0.00959761	No Change Medium Expression	spliced
4930520O04Rik_chr9_114368303_114377229(+)_transcript=ENSMUST00000131898.1	4930520O04Rik	2660	2460.99	0.311662	0	0	No Change Low Expression	spliced
4930522L14Rik_chr5_109735990_109751886(-)_transcript=ENSMUST00000112547.7	4930522L14Rik	2001	1801.99	16.3048	4.67257	3.42691	Down	spliced
4930523C07Rik_chr1_160044382_160080208(+)_transcript=ENSMUST00000097513.3	4930523C07Rik	300	103.699	0.601889	0	0	No Change Low Expression	spliced
4930524B15Rik_chr11_31965592_31979651(+)_transcript=ENSMUST00000102829.3	4930524B15Rik	2000	1800.99	0.32182	0	0	No Change Low Expression	spliced
4930524O07Rik_chr9_106891547_106895182(+)_transcript=ENSMUST00000162334.1	4930524O07Rik	293	97.5751	0.519111	0	0	No Change Low Expression	spliced
4930525G20Rik_chr13_67796594_67830985(-)_transcript=ENSMUST00000181912.1	4930525G20Rik	2987	2787.99	0.160051	0.525306	0.448563	No Change Low Expression	spliced
4930526A20Rik_chr17_28075050_28076677(-)_transcript=ENSMUST00000134228.2	4930526A20Rik	950	750.994	2.25223	0	0	No Change Medium Expression	spliced
4930526L06Rik_chr19_11196817_11299886(+)_transcript=ENSMUST00000181137.1	4930526L06Rik	1022	822.994	1.13932	0.00939647	-0.00550543	No Change Medium Expression	spliced
4930532G15Rik_chr1_185359461_185362865(-)_transcript=ENSMUST00000195314.1	4930532G15Rik	1457	1257.99	0.286705	0	0	No Change Low Expression	spliced
4930537H20Rik_chr3_90292301_90293983(-)_transcript=ENSMUST00000200437.1	4930537H20Rik	1683	1483.99	0.362832	0	0	No Change Low Expression	spliced
4930539J05Rik_chr3_135436209_135438665(-)_transcript=ENSMUST00000181619.1	4930539J05Rik	1406	1206.99	1.4359	0	0	No Change Medium Expression	spliced
4930550C14Rik_chr9_53402325_53434402(+)_transcript=ENSMUST00000217318.1	4930550C14Rik	1055	855.994	0.42012	0	0	No Change Low Expression	spliced
4930556H04Rik_chr12_99569740_99571414(+)_transcript=ENSMUST00000222451.1	4930556H04Rik	1675	1475.99	0.175702	0	0	No Change Low Expression	spliced
4930558C23Rik_chr3_95386461_95402841(-)_transcript=ENSMUST00000196239.1	4930558C23Rik	731	531.994	0.311177	0	0	No Change Low Expression	spliced
4930558J18Rik_chr1_57359222_57377544(-)_transcript=ENSMUST00000181949.2	4930558J18Rik	2052	1852.99	1.712	0.0340678	-0.0580233	No Change Medium Expression	spliced
4930566F21Rik_chr5_31486629_31495179(-)_transcript=ENSMUST00000201177.1	4930566F21Rik	1535	1335.99	13.4392	0	0	No Change Medium Expression	spliced
4930578M01Rik_chr15_98983348_98996446(+)_transcript=ENSMUST00000230013.1	4930578M01Rik	5157	4957.99	0.458016	3.47533	3.13695	No Change Low Expression	spliced
4930579G24Rik_chr3_79629079_79632820(+)_transcript=ENSMUST00000029388.9	4930579G24Rik	1970	1770.99	5.6923	0	0	No Change Medium Expression	spliced
4930594C11Rik_chr1_37485851_37488605(-)_transcript=ENSMUST00000192316.1	4930594C11Rik	2755	2555.99	0.956768	1.08428	0.807146	No Change Low Expression	spliced
4931406C07Rik_chr9_15283337_15306448(-)_transcript=ENSMUST00000178977.8	4931406C07Rik	2650	2450.99	10.5873	0	0	No Change Medium Expression	spliced
4931406P16Rik_chr7_34236707_34313551(-)_transcript=ENSMUST00000108074.7	4931406P16Rik	6224	6024.99	17.3384	0	0	No Change High Expression	spliced
4931414P19Rik_chr14_54583663_54605993(-)_transcript=ENSMUST00000022786.5	4931414P19Rik	2670	2470.99	3.23205	0	0	No Change Medium Expression	spliced
4931428F04Rik_chr8_105280409_105289864(-)_transcript=ENSMUST00000212219.1	4931428F04Rik	2044	1844.99	3.14528	0.0547675	0.0547675	No Change Medium Expression	spliced
4931440P22Rik_chr3_65507257_65529379(-)_transcript=ENSMUST00000099076.3	4931440P22Rik	1786	1586.99	0.283208	0	0	No Change Low Expression	spliced
4932422M17Rik_chr5_123138931_123141569(+)_transcript=ENSMUST00000195992.1	4932422M17Rik	2639	2439.99	1.06941	2.8265	2.01303	No Change Medium Expression	spliced
4932438A13Rik_chr3_36863104_37053033(+)_transcript=ENSMUST00000057272.14	4932438A13Rik	15883	15684	14.7154	0	0	No Change Medium Expression	spliced
4933402E13Rik_chrX_62283499_62292078(+)_transcript=ENSMUST00000178085.7	4933402E13Rik	1931	1731.99	1.20147	0	0	No Change Medium Expression	spliced
4933404O12Rik_chr5_136919146_136937112(+)_transcript=ENSMUST00000181190.2	4933404O12Rik	4058	3858.99	4.38507	0	0	No Change Medium Expression	spliced
4933406P04Rik_chr10_20310506_20312294(-)_transcript=ENSMUST00000092680.2	4933406P04Rik	1789	1589.99	0.364692	0.513472	0.390684	No Change Low Expression	spliced
4933407K13Rik_chrX_75706932_75764699(-)_transcript=ENSMUST00000138943.7	4933407K13Rik	4364	4164.99	3.91361	0.590326	0.444691	No Change Medium Expression	spliced
4933408J17Rik_chr10_93589413_93605245(+)_transcript=ENSMUST00000181835.1	4933408J17Rik	1859	1659.99	0.275513	0	0	No Change Low Expression	spliced
4933412E12Rik_chr10_116949757_116963279(+)_transcript=ENSMUST00000217853.1	4933412E12Rik	1698	1498.99	1.08193	0.438261	0.246513	No Change Medium Expression	spliced
4933413C19Rik_chr19_28580533_28583294(-)_transcript=ENSMUST00000162380.1	4933413C19Rik	2217	2017.99	0.258667	0	0	No Change Low Expression	spliced
4933415A04Rik_chr11_43587040_43589048(+)_transcript=ENSMUST00000056256.2	4933415A04Rik	2009	1809.99	0.480547	0	0	No Change Low Expression	spliced
4933417C20Rik_chr1_160212943_160214816(+)_transcript=ENSMUST00000193962.1	4933417C20Rik	1874	1674.99	0.591203	0.56146	0.323558	No Change Low Expression	spliced
4933425D22Rik_chr5_149441861_149443581(+)_transcript=ENSMUST00000201035.1	4933425D22Rik	1721	1521.99	0.134001	0	0	No Change Low Expression	spliced
4933427D06Rik_chr6_88950683_89110031(+)_transcript=ENSMUST00000168837.6	4933427D06Rik	2467	2267.99	0.337341	0	0	No Change Low Expression	spliced
4933427D14Rik_chr11_72153929_72207459(-)_transcript=ENSMUST00000238653.1	4933427D14Rik	4390	4190.99	1.62593	0	0	No Change Medium Expression	spliced
4933429H19Rik_chr3_30792570_30793564(-)_transcript=ENSMUST00000187361.2	4933429H19Rik	995	795.994	0.208135	0	0	No Change Low Expression	spliced
4933430I17Rik_chr4_62525369_62547993(+)_transcript=ENSMUST00000062145.1	4933430I17Rik	1783	1583.99	0.872132	0	0	No Change Low Expression	spliced
4933431E20Rik_chr3_107888850_107896213(-)_transcript=ENSMUST00000131345.7	4933431E20Rik	5407	5207.99	0.167647	0	0	No Change Low Expression	spliced
4933431K14Rik_chr9_85749078_85750429(+)_transcript=ENSMUST00000195799.1	4933431K14Rik	1352	1152.99	0.251458	0	0	No Change Low Expression	spliced
4933434E20Rik_chr3_90051636_90063341(+)_transcript=ENSMUST00000160640.7	4933434E20Rik	2510	2310.99	8.53761	0	0	No Change Medium Expression	spliced
4933435E02Rik_chr18_32112460_32120413(-)_transcript=ENSMUST00000234068.1	4933435E02Rik	1365	1165.99	0.200759	0	0	No Change Low Expression	spliced
4933435F18Rik_chr4_124326308_124332508(-)_transcript=ENSMUST00000154878.1	4933435F18Rik	2174	1974.99	0.336221	0	0	No Change Low Expression	spliced
4933437G19Rik_chr5_121847667_121848844(-)_transcript=ENSMUST00000197910.1	4933437G19Rik	1178	978.994	0.253843	0.299819	0.284471	No Change Low Expression	spliced
4933439C10Rik_chr11_59505662_59513647(+)_transcript=ENSMUST00000132226.1	4933439C10Rik	3184	2984.99	1.35509	0	0	No Change Medium Expression	spliced
4933439N14Rik_chr8_12502899_12505341(+)_transcript=ENSMUST00000211062.1	4933439N14Rik	1087	887.994	0.264177	1.24769	1.01746	No Change Low Expression	spliced
4933440N22Rik_chr6_117905808_117907760(-)_transcript=ENSMUST00000204444.1	4933440N22Rik	1952	1752.99	0.991801	0.679741	0.484611	No Change Low Expression	spliced
5031425E22Rik_chr5_23382308_23434269(-)_transcript=ENSMUST00000101522.2	5031425E22Rik	2110	1910.99	6.23612	0	0	No Change Medium Expression	spliced
5031434O11Rik_chr3_51560035_51567117(+)_transcript=ENSMUST00000180404.7	5031434O11Rik	3731	3531.99	0.293558	0	0	No Change Low Expression	spliced
5031439G07Rik_chr15_84943936_84988551(-)_transcript=ENSMUST00000165743.1	5031439G07Rik	5032	4832.99	7.0971	0.00959761	0.00959761	No Change Medium Expression	spliced
5033404E19Rik_chr1_185487294_185498159(+)_transcript=ENSMUST00000194748.1	5033404E19Rik	1065	865.994	1.75661	0.993554	0.932443	No Change Medium Expression	spliced
5330411J11Rik_chr2_59382502_59387471(-)_transcript=ENSMUST00000137162.7	5330411J11Rik	1635	1435.99	0.296439	0	0	No Change Low Expression	spliced
5330417C22Rik_chr3_108455694_108536536(-)_transcript=ENSMUST00000048012.12	5330417C22Rik	3321	3121.99	0.273012	0	0	No Change Low Expression	spliced
5330431K02Rik_chr13_99502477_99504439(-)_transcript=ENSMUST00000223710.1	5330431K02Rik	1963	1763.99	1.3598	0	0	No Change Medium Expression	spliced
5330438D12Rik_chr10_116509052_116583515(+)_transcript=ENSMUST00000064101.7	5330438D12Rik	2229	2029.99	1.22357	0	0	No Change Medium Expression	spliced
5430403G16Rik_chr5_109674545_109691041(-)_transcript=ENSMUST00000092720.3	5430403G16Rik	3341	3141.99	9.04494	4.60135	2.80576	No Change Medium Expression	spliced
5430405H02Rik_chr2_156844351_156862963(-)_transcript=ENSMUST00000153616.8	5430405H02Rik	1431	1231.99	0.752103	0	0	No Change Low Expression	spliced
5430414B19Rik_chr14_16271089_16271838(+)_transcript=ENSMUST00000224044.1	5430414B19Rik	750	550.994	0.250895	0	0	No Change Low Expression	spliced
5430416N02Rik_chr5_100420842_100429535(-)_transcript=ENSMUST00000181873.7	5430416N02Rik	626	426.994	37.5494	0	0	No Change High Expression	spliced
5430420F09Rik_chr3_52071589_52073387(-)_transcript=ENSMUST00000194956.1	5430420F09Rik	1799	1599.99	0.503266	0.0533026	0.0533026	No Change Low Expression	spliced
5430430B14Rik_chr8_27279441_27281070(+)_transcript=ENSMUST00000209427.1	5430430B14Rik	1630	1430.99	1.79452	0	0	No Change Medium Expression	spliced
5530601H04Rik_chrX_105037197_105079609(-)_transcript=ENSMUST00000138460.7	5530601H04Rik	3732	3532.99	1.87045	1.42195	0.978678	No Change Medium Expression	spliced
5730405O15Rik_chrX_13042015_13045297(+)_transcript=ENSMUST00000127521.1	5730405O15Rik	1749	1549.99	0.761503	0	0	No Change Low Expression	spliced
5730409E04Rik_chr4_126609818_126614371(+)_transcript=ENSMUST00000164362.1	5730409E04Rik	2855	2655.99	1.69781	0	0	No Change Medium Expression	spliced
5730414N17Rik_chr15_98872644_98874082(+)_transcript=ENSMUST00000230130.1	5730414N17Rik	1439	1239.99	0.167011	0	0	No Change Low Expression	spliced
5730419F03Rik_chr1_78595031_78609508(-)_transcript=ENSMUST00000190504.1	5730419F03Rik	2092	1892.99	1.85312	8.16041	7.13994	No Change Medium Expression	spliced
5730455P16Rik_chr11_80360492_80378034(-)_transcript=ENSMUST00000103225.10	5730455P16Rik	4554	4354.99	7.31997	0	0	No Change Medium Expression	spliced
5730480H06Rik_chr5_48327952_48414294(+)_transcript=ENSMUST00000030968.6	5730480H06Rik	1616	1416.99	9.12806	0	0	No Change Medium Expression	spliced
5730507C01Rik_chr12_18514510_18535254(+)_transcript=ENSMUST00000063216.5	5730507C01Rik	2431	2231.99	25.1164	0.0106974	0.0106974	No Change High Expression	spliced
5730521K06Rik_chr15_76590120_76591727(+)_transcript=ENSMUST00000230081.1	5730521K06Rik	1608	1408.99	0.496164	0	0	No Change Low Expression	spliced
5830417I10Rik_chr3_88775216_88825587(+)_transcript=ENSMUST00000135913.1	5830417I10Rik	6190	5990.99	30.5462	0.0208949	-0.180366	No Change High Expression	spliced
5830418P13Rik_chr9_103423578_103461260(+)_transcript=ENSMUST00000143564.7	5830418P13Rik	2178	1978.99	0.162482	0	0	No Change Low Expression	spliced
5830448L01Rik_chr14_34672465_34673763(-)_transcript=ENSMUST00000228874.1	5830448L01Rik	1299	1099.99	0.489494	0	0	No Change Low Expression	spliced
5830454E08Rik_chr9_120577331_120578074(+)_transcript=ENSMUST00000213974.1	5830454E08Rik	744	544.994	0.987975	0	0	No Change Low Expression	spliced
5930403N24Rik_chr10_37139402_37151315(+)_transcript=ENSMUST00000217338.1	5930403N24Rik	337	138.45	0.484339	0	0	No Change Low Expression	spliced
5930420M18Rik_chr5_30897300_30899580(+)_transcript=ENSMUST00000202893.1	5930420M18Rik	2281	2081.99	0.969569	2.41329	1.48673	No Change Low Expression	spliced
5930430L01Rik_chr5_148990056_148995223(-)_transcript=ENSMUST00000145042.1	5930430L01Rik	3994	3794.99	0.488951	1.38206	1.09044	No Change Low Expression	spliced
6030442K20Rik_chr1_132466433_132477064(-)_transcript=ENSMUST00000180835.1	6030442K20Rik	1540	1340.99	0.291803	3.29312	2.98864	No Change Low Expression	spliced
6030443J06Rik_chr5_22550432_22807850(+)_transcript=ENSMUST00000181764.7	6030443J06Rik	4299	4099.99	0.883698	0	0	No Change Low Expression	spliced
6030445D17Rik_chr4_136462250_136463977(+)_transcript=ENSMUST00000084593.2	6030445D17Rik	1728	1528.99	0.162532	0	0	No Change Low Expression	spliced
6030458C11Rik_chr15_12808177_12824649(-)_transcript=ENSMUST00000057256.4	6030458C11Rik	3966	3766.99	7.56475	1.15636	0.251914	No Change Medium Expression	spliced
6030460B20Rik_chr1_60353119_60354176(+)_transcript=ENSMUST00000191764.1	6030460B20Rik	1058	858.994	0.922857	0	0	No Change Low Expression	spliced
6330403K07Rik_chr11_71031941_71033513(-)_transcript=ENSMUST00000238695.1	6330403K07Rik	1573	1373.99	0.482313	0	0	No Change Low Expression	spliced
6330403L08Rik_chr5_138995056_139000577(+)_transcript=ENSMUST00000187923.1	6330403L08Rik	5522	5322.99	0.280118	0	0	No Change Low Expression	spliced
6330408M09Rik_chr16_23127793_23128922(+)_transcript=ENSMUST00000231407.1	6330408M09Rik	1130	930.994	0.84528	0.878181	0.601908	No Change Low Expression	spliced
6330410L21Rik_chr3_129753758_129763884(+)_transcript=ENSMUST00000199846.1	6330410L21Rik	3871	3671.99	0.154805	0	0	No Change Low Expression	spliced
6330418K02Rik_chr5_138264043_138266661(+)_transcript=ENSMUST00000124298.1	6330418K02Rik	743	543.994	0.568431	0.151965	0.0845925	No Change Low Expression	spliced
6330537M06Rik_chr8_70766579_70768220(+)_transcript=ENSMUST00000212384.1	6330537M06Rik	1642	1442.99	0.143516	0	0	No Change Low Expression	spliced
6430511E19Rik_chr7_92639949_92643783(+)_transcript=ENSMUST00000192772.1	6430511E19Rik	3835	3635.99	1.19495	0.626788	0.149877	No Change Medium Expression	spliced
6430571L13Rik_chr9_107340602_107352422(+)_transcript=ENSMUST00000042581.3	6430571L13Rik	2599	2399.99	0.324404	0	0	No Change Low Expression	spliced
6430590A07Rik_chr3_40885897_40894193(-)_transcript=ENSMUST00000181813.1	6430590A07Rik	1032	832.994	2.05001	0.472669	0.104429	No Change Medium Expression	spliced
6430710C18Rik_chr2_72745846_72813717(-)_transcript=ENSMUST00000125746.1	6430710C18Rik	509	309.994	0.267221	0	0	No Change Low Expression	spliced
6720464F23Rik_chr1_160608955_160612450(-)_transcript=ENSMUST00000193946.1	6720464F23Rik	3496	3296.99	0.679049	0	0	No Change Low Expression	spliced
6720475M21Rik_chr5_74367163_74369915(-)_transcript=ENSMUST00000201755.1	6720475M21Rik	2753	2553.99	0.474427	0.177917	0.162341	No Change Low Expression	spliced
6720489N17Rik_chr13_62603013_62624182(-)_transcript=ENSMUST00000201563.3	6720489N17Rik	2640	2440.99	3.15949	2.58953	1.74242	No Change Medium Expression	spliced
6820402A03Rik_chr1_66793645_66796298(-)_transcript=ENSMUST00000194648.1	6820402A03Rik	2654	2454.99	0.968533	0.680219	0.388866	No Change Low Expression	spliced
6820408C15Rik_chr2_152415587_152444330(+)_transcript=ENSMUST00000039961.11	6820408C15Rik	1684	1484.99	0.374706	0	0	No Change Low Expression	spliced
6820431F20Rik_chr8_20262613_20297432(-)_transcript=ENSMUST00000153748.1	6820431F20Rik	4659	4459.99	38.4056	0	0	No Change High Expression	spliced
8030445P17Rik_chr1_25722038_25724778(-)_transcript=ENSMUST00000192614.1	8030445P17Rik	2741	2541.99	0.134958	0	0	No Change Low Expression	spliced
8030456M14Rik_chr19_53390789_53391795(+)_transcript=ENSMUST00000238029.1	8030456M14Rik	1007	807.994	1.53783	0	0	No Change Medium Expression	spliced
8030462N17Rik_chr18_77631497_77714486(-)_transcript=ENSMUST00000074653.5	8030462N17Rik	5125	4925.99	26.1997	0	0	No Change High Expression	spliced
8030474K03Rik_chrX_101794656_101798642(+)_transcript=ENSMUST00000151231.9	8030474K03Rik	1940	1740.99	3.04415	0	0	No Change Medium Expression	spliced
8430422M14Rik_chr3_35955436_35956257(-)_transcript=ENSMUST00000199608.1	8430422M14Rik	822	622.994	0.664829	0.0911773	0.052806	No Change Low Expression	spliced
8430429K09Rik_chr11_3452365_3479831(+)_transcript=ENSMUST00000146456.1	8430429K09Rik	1675	1475.99	1.83656	2.7794	1.75549	No Change Medium Expression	spliced
9030025P20Rik_chr17_14978468_14991572(+)_transcript=ENSMUST00000061688.10	9030025P20Rik	1844	1644.99	1.16639	0	0	No Change Medium Expression	spliced
9030624G23Rik_chr12_24043202_24097246(-)_transcript=ENSMUST00000101538.4	9030624G23Rik	2245	2045.99	3.36147	1.37447	1.08458	No Change Medium Expression	spliced
9130002K18Rik_chr15_35787154_35790279(+)_transcript=ENSMUST00000228829.1	9130002K18Rik	3126	2926.99	0.413141	1.37605	1.09649	No Change Low Expression	spliced
9130008F23Rik_chr17_40875482_40880559(-)_transcript=ENSMUST00000233122.1	9130008F23Rik	781	581.994	1.49474	1.43981	1.12394	No Change Medium Expression	spliced
9130019O22Rik_chr7_127382260_127387166(-)_transcript=ENSMUST00000164345.1	9130019O22Rik	2735	2535.99	1.75942	0	0	No Change Medium Expression	spliced
9130023H24Rik_chr7_128234458_128238031(-)_transcript=ENSMUST00000078816.4	9130023H24Rik	3574	3374.99	0.748601	0	0	No Change Low Expression	spliced
9130221H12Rik_chr7_25228687_25230263(+)_transcript=ENSMUST00000169914.1	9130221H12Rik	1465	1265.99	0.646174	0	0	No Change Low Expression	spliced
9130230N09Rik_chr11_22858931_22861264(+)_transcript=ENSMUST00000174568.1	9130230N09Rik	663	463.994	0.803553	0	0	No Change Low Expression	spliced
9130401M01Rik_chr15_58022259_58034325(-)_transcript=ENSMUST00000100655.4	9130401M01Rik	1341	1141.99	49.2762	0	0	No Change High Expression	spliced
9130604C24Rik_chr5_137502673_137503628(+)_transcript=ENSMUST00000197965.1	9130604C24Rik	956	756.994	0.437715	0	0	No Change Low Expression	spliced
9230111E07Rik_chr2_167782053_167783486(+)_transcript=ENSMUST00000124850.1	9230111E07Rik	811	611.994	0.57971	0	0	No Change Low Expression	spliced
9230112E08Rik_chr2_180983924_180987275(+)_transcript=ENSMUST00000189441.1	9230112E08Rik	3352	3152.99	1.50147	0	0	No Change Medium Expression	spliced
9230114K14Rik_chr5_52190672_52279034(+)_transcript=ENSMUST00000199547.4	9230114K14Rik	437	237.994	3.41106	0.179332	0.179332	No Change Medium Expression	spliced
9330104G04Rik_chr7_16871347_16874886(-)_transcript=ENSMUST00000181501.2	9330104G04Rik	2242	2042.99	0.902754	0	0	No Change Low Expression	spliced
9330151L19Rik_chr12_69197211_69199867(+)_transcript=ENSMUST00000181850.2	9330151L19Rik	2545	2345.99	1.20243	0	0	No Change Medium Expression	spliced
9330159F19Rik_chr10_29211606_29230779(+)_transcript=ENSMUST00000213489.1	9330159F19Rik	2992	2792.99	1.64623	2.64255	1.89891	No Change Medium Expression	spliced
9330159M07Rik_chr9_88840236_88858870(-)_transcript=ENSMUST00000181448.2	9330159M07Rik	602	402.994	3.6076	0	0	No Change Medium Expression	spliced
9330161L09Rik_chr12_103406822_103407976(-)_transcript=ENSMUST00000238327.1	9330161L09Rik	1153	953.994	1.38477	0	0	No Change Medium Expression	spliced
9330162012Rik_chr13_24937401_24941417(+)_transcript=ENSMUST00000154919.1	9330162012Rik	3836	3636.99	0.18221	0	0	No Change Low Expression	spliced
9330182L06Rik_chr5_9266118_9481825(+)_transcript=ENSMUST00000134991.7	9330182L06Rik	4115	3915.99	0.860229	0	-0.0153485	No Change Low Expression	spliced
9330185C12Rik_chr1_113891385_113964134(-)_transcript=ENSMUST00000180837.1	9330185C12Rik	1009	809.994	0.894918	0.00959761	0.00959761	No Change Low Expression	spliced
9430002A10Rik_chr8_88174560_88175034(+)_transcript=ENSMUST00000185395.1	9430002A10Rik	475	275.994	2.10098	0	0	No Change Medium Expression	spliced
9430015G10Rik_chr4_156109982_156127265(+)_transcript=ENSMUST00000072554.12	9430015G10Rik	2528	2328.99	11.4153	0	0	No Change Medium Expression	spliced
9430025C20Rik_chr4_3806635_3808751(-)_transcript=ENSMUST00000068663.3	9430025C20Rik	2115	1915.99	0.377998	0	0	No Change Low Expression	spliced
9430031K09Rik_chr12_98762048_98762972(+)_transcript=ENSMUST00000222913.1	9430031K09Rik	925	725.994	0.143979	0	0	No Change Low Expression	spliced
9430034N14Rik_chr1_156026223_156030007(-)_transcript=ENSMUST00000193532.1	9430034N14Rik	3785	3585.99	0.40877	0	0	No Change Low Expression	spliced
9430037G07Rik_chr9_88595325_88599516(-)_transcript=ENSMUST00000180723.7	9430037G07Rik	3177	2977.99	0.899541	0.0193386	0.0193386	No Change Low Expression	spliced
9430037O13Rik_chr1_191535885_191536892(-)_transcript=ENSMUST00000192556.1	9430037O13Rik	1008	808.994	3.12305	1.05574	0.69505	No Change Medium Expression	spliced
9430038I01Rik_chr7_137375574_137410762(-)_transcript=ENSMUST00000068996.12	9430038I01Rik	1126	926.994	6.62578	0.0775626	0.0142679	No Change Medium Expression	spliced
9430064I24Rik_chr7_127800094_127802762(-)_transcript=ENSMUST00000206516.1	9430064I24Rik	2669	2469.99	0.570134	0	0	No Change Low Expression	spliced
9430065F17Rik_chr13_67553035_67564010(+)_transcript=ENSMUST00000180908.8	9430065F17Rik	1084	884.994	0.487617	0	0	No Change Low Expression	spliced
9430081H08Rik_chr9_44378633_44379450(-)_transcript=ENSMUST00000217460.1	9430081H08Rik	818	618.994	1.87355	0.638241	0.49243	No Change Medium Expression	spliced
9430087J23Rik_chr1_160315344_160316495(-)_transcript=ENSMUST00000195414.1	9430087J23Rik	1152	952.994	0.194572	0	0	No Change Low Expression	spliced
9530018F02Rik_chr12_77236065_77238663(-)_transcript=ENSMUST00000219513.1	9530018F02Rik	2599	2399.99	0.189835	0	0	No Change Low Expression	spliced
9530051G07Rik_chrX_153037629_153072915(+)_transcript=ENSMUST00000127673.1	9530051G07Rik	4414	4214.99	0.132063	0	0	No Change Low Expression	spliced
9530053A07Rik_chr7_28129466_28164811(+)_transcript=ENSMUST00000059886.11	9530053A07Rik	7922	7722.99	0.137359	0	0	No Change Low Expression	spliced
9530056K15Rik_chr5_143397248_143399563(-)_transcript=ENSMUST00000061947.5	9530056K15Rik	2315	2115.99	0.346599	0	-0.0339296	No Change Low Expression	spliced
9530068E07Rik_chr11_52396428_52408728(+)_transcript=ENSMUST00000036952.4	9530068E07Rik	2467	2267.99	15.8693	0	0	No Change Medium Expression	spliced
9530077C05Rik_chr9_22411513_22444681(+)_transcript=ENSMUST00000058868.8	9530077C05Rik	2223	2023.99	1.19059	0.75784	0.635052	No Change Medium Expression	spliced
9530078K11Rik_chr7_92902179_92902872(+)_transcript=ENSMUST00000208883.1	9530078K11Rik	694	494.994	1.14321	0.403777	0.275166	No Change Medium Expression	spliced
9530082P21Rik_chr17_23743234_23754065(+)_transcript=ENSMUST00000181605.1	9530082P21Rik	3162	2962.99	0.256355	0.00959761	0.00959761	No Change Low Expression	spliced
9530085L11Rik_chr8_13285352_13287466(-)_transcript=ENSMUST00000203963.1	9530085L11Rik	2115	1915.99	0.315249	0	0	No Change Low Expression	spliced
9530086O07Rik_chr6_101285826_101288510(-)_transcript=ENSMUST00000203503.1	9530086O07Rik	2685	2485.99	0.141128	0	0	No Change Low Expression	spliced
9630014M24Rik_chr18_38601534_38789045(+)_transcript=ENSMUST00000149112.1	9630014M24Rik	737	537.994	0.946241	0	0	No Change Low Expression	spliced
9630028I04Rik_chr17_27235075_27248066(-)_transcript=ENSMUST00000236498.1	9630028I04Rik	2579	2379.99	2.13679	0	0	Up	spliced
9930012K11Rik_chr14_70154405_70159502(-)_transcript=ENSMUST00000153871.1	9930012K11Rik	1983	1783.99	2.25444	0	0	No Change Medium Expression	spliced
9930014A18Rik_chr15_60822271_60831793(+)_transcript=ENSMUST00000180730.2	9930014A18Rik	3074	2874.99	0.887654	0	0	No Change Low Expression	spliced
9930017N22Rik_chr15_34126944_34130688(+)_transcript=ENSMUST00000228274.1	9930017N22Rik	3745	3545.99	2.4043	0	0	No Change Medium Expression	spliced
9930021J03Rik_chr19_29714402_29805989(-)_transcript=ENSMUST00000177155.7	9930021J03Rik	6632	6432.99	12.9339	0.36112	0.176486	No Change Medium Expression	spliced
9930024M15Rik_chr10_41826538_41829121(+)_transcript=ENSMUST00000214902.1	9930024M15Rik	2584	2384.99	0.820427	0	0	No Change Low Expression	spliced
9930104L06Rik_chr4_124937048_124944656(+)_transcript=ENSMUST00000094769.12	9930104L06Rik	2911	2711.99	4.82906	0	-0.0153485	No Change Medium Expression	spliced
9930120I10Rik_chr6_87805472_87806336(-)_transcript=ENSMUST00000203027.1	9930120I10Rik	865	665.994	0.435533	0	0	No Change Low Expression	spliced
A030001D20Rik_chr7_45635680_45638765(-)_transcript=ENSMUST00000211533.1	A030001D20Rik	1542	1342.99	1.32742	3.03285	2.20403	No Change Medium Expression	spliced
A030005L19Rik_chr1_82913325_82914130(+)_transcript=ENSMUST00000220768.1	A030005L19Rik	806	606.994	0.477648	0	0	No Change Low Expression	spliced
A130010J15Rik_chr1_193168046_193177832(+)_transcript=ENSMUST00000110831.3	A130010J15Rik	2257	2057.99	1.70064	0	0	No Change Medium Expression	spliced
A130012E19Rik_chr10_115394750_115397884(+)_transcript=ENSMUST00000218674.1	A130012E19Rik	3135	2935.99	0.125826	0	0	No Change Low Expression	spliced
A130014A01Rik_chr8_120101582_120103904(+)_transcript=ENSMUST00000183021.1	A130014A01Rik	2323	2123.99	0.459299	0.0318542	0.0318542	No Change Low Expression	spliced
A230056P14Rik_chr7_55962531_55980868(+)_transcript=ENSMUST00000130189.1	A230056P14Rik	2177	1977.99	0.532544	0.624227	0.360728	No Change Low Expression	spliced
A230072C01Rik_chrX_20961684_20986737(+)_transcript=ENSMUST00000136447.1	A230072C01Rik	1412	1212.99	1.67523	0	0	No Change Medium Expression	spliced
A230087F16Rik_chr12_111284762_111293988(+)_transcript=ENSMUST00000181561.2	A230087F16Rik	1303	1103.99	0.185023	0.108969	0.108969	No Change Low Expression	spliced
A230107N01Rik_chr13_84219581_84222175(-)_transcript=ENSMUST00000180894.1	A230107N01Rik	2348	2148.99	0.385468	0	0	No Change Low Expression	spliced
A2m_chr6_121635376_121679227(+)_transcript=ENSMUST00000032203.8	A2m	4605	4405.99	0.938453	0	0	No Change Low Expression	spliced
A330009N23Rik_chr15_101221195_101225186(-)_transcript=ENSMUST00000180639.2	A330009N23Rik	1393	1193.99	0.603795	0	0	No Change Low Expression	spliced
A330035P11Rik_chr14_122103430_122106974(-)_transcript=ENSMUST00000144926.1	A330035P11Rik	3074	2874.99	0.282135	0	0	No Change Low Expression	spliced
A330049N07Rik_chr10_72973303_73086705(-)_transcript=ENSMUST00000220010.1	A330049N07Rik	1989	1789.99	0.507504	0	0	No Change Low Expression	spliced
A330074K22Rik_chr8_120204434_120228230(-)_transcript=ENSMUST00000183235.1	A330074K22Rik	2489	2289.99	0.126312	0	0	No Change Low Expression	spliced
A330094K24Rik_chr18_77729496_77732739(-)_transcript=ENSMUST00000180530.2	A330094K24Rik	1269	1069.99	0.75926	0	0	No Change Low Expression	spliced
A330102I10Rik_chr13_29014399_29040336(+)_transcript=ENSMUST00000140415.7	A330102I10Rik	682	482.994	0.220581	0	0	No Change Low Expression	spliced
A430005L14Rik_chr4_153957237_153961925(+)_transcript=ENSMUST00000058393.8	A430005L14Rik	1098	898.994	27.3411	0	0	No Change High Expression	spliced
A430019L02Rik_chr18_46758557_46761977(+)_transcript=ENSMUST00000234279.1	A430019L02Rik	3421	3221.99	0.250773	0	0	No Change Low Expression	spliced
A430033K04Rik_chr5_138622859_138652414(+)_transcript=ENSMUST00000069862.10	A430033K04Rik	3038	2838.99	2.61571	0	0	No Change Medium Expression	spliced
A430057M04Rik_chr14_21847578_21856931(+)_transcript=ENSMUST00000170150.8	A430057M04Rik	2176	1976.99	0.338047	0	0	No Change Low Expression	spliced
A430073D23Rik_chr5_109769407_109796298(-)_transcript=ENSMUST00000196262.1	A430073D23Rik	665	465.994	0.647705	0.694758	0.577332	No Change Low Expression	spliced
A430078I02Rik_chr6_86470277_86480830(-)_transcript=ENSMUST00000154066.1	A430078I02Rik	2233	2033.99	0.235308	0	0	No Change Low Expression	spliced
A430103D13Rik_chr12_76344525_76345381(-)_transcript=ENSMUST00000220077.1	A430103D13Rik	857	657.994	2.81854	0	0	No Change Medium Expression	spliced
A430105J06Rik_chr1_186749396_186752921(+)_transcript=ENSMUST00000180869.1	A430105J06Rik	1275	1075.99	0.877328	0.534369	0.442278	No Change Low Expression	spliced
A430110L20Rik_chr1_181225986_181228498(+)_transcript=ENSMUST00000181680.1	A430110L20Rik	2513	2313.99	0.340083	0	0	No Change Low Expression	spliced
A4galt_chr15_83226722_83251774(-)_transcript=ENSMUST00000049530.13	A4galt	2092	1892.99	17.763	0	0	Up	spliced
A530020G20Rik_chr3_121531619_121536206(+)_transcript=ENSMUST00000181070.2	A530020G20Rik	3660	3460.99	0.245818	0	0	No Change Low Expression	spliced
A530030E21Rik_chr16_19243525_19244834(+)_transcript=ENSMUST00000199551.1	A530030E21Rik	1310	1110.99	0.149122	0	0	No Change Low Expression	spliced
A530041M06Rik_chr3_104499320_104501607(-)_transcript=ENSMUST00000199690.1	A530041M06Rik	2288	2088.99	0.367322	0	0	No Change Low Expression	spliced
A530064D06Rik_chr17_48149126_48167275(-)_transcript=ENSMUST00000053612.13	A530064D06Rik	1859	1659.99	0.27188	0	0	No Change Low Expression	spliced
A530064N14Rik_chr9_72687224_72688715(+)_transcript=ENSMUST00000195338.1	A530064N14Rik	1492	1292.99	4.81521	0	0	No Change Medium Expression	spliced
A530083M17Rik_chr3_153309370_153312745(-)_transcript=ENSMUST00000199877.1	A530083M17Rik	3376	3176.99	0.707785	1.71954	1.48853	Down	spliced
A630001G21Rik_chr1_85717083_85778643(-)_transcript=ENSMUST00000159122.7	A630001G21Rik	2053	1853.99	0.180616	0	0	No Change Low Expression	spliced
A630052C17Rik_chr11_29170909_29173558(-)_transcript=ENSMUST00000129876.1	A630052C17Rik	2203	2003.99	0.149535	0.496247	0.496247	No Change Low Expression	spliced
A630072M18Rik_chr5_20950989_20956398(+)_transcript=ENSMUST00000190567.1	A630072M18Rik	5410	5210.99	1.47392	0.984168	0.577432	No Change Medium Expression	spliced
A630089N07Rik_chr16_98001310_98082450(-)_transcript=ENSMUST00000231268.1	A630089N07Rik	2142	1942.99	16.3257	0	0	No Change High Expression	spliced
A730011C13Rik_chr3_94994410_94997350(-)_transcript=ENSMUST00000141787.1	A730011C13Rik	1877	1677.99	0.510652	0.0299445	0.0299445	No Change Low Expression	spliced
A730036I17Rik_chr2_129218969_129235604(+)_transcript=ENSMUST00000143346.7	A730036I17Rik	3431	3231.99	0.44858	0	0	No Change Low Expression	spliced
A730049H05Rik_chr6_92816478_92847174(+)_transcript=ENSMUST00000057977.3	A730049H05Rik	2239	2039.99	0.54208	0.0191952	0.0038467	No Change Low Expression	spliced
A730062M13Rik_chr9_72869652_72871561(+)_transcript=ENSMUST00000192843.1	A730062M13Rik	1910	1710.99	0.502665	0.650862	0.45367	No Change Low Expression	spliced
A730063M14Rik_chr10_127070375_127074796(+)_transcript=ENSMUST00000217956.1	A730063M14Rik	1770	1570.99	1.49103	0	0	No Change Medium Expression	spliced
A830018L16Rik_chr1_11414105_11975901(+)_transcript=ENSMUST00000135014.7	A830018L16Rik	6451	6251.99	1.18546	0	0	No Change Medium Expression	spliced
A830073O21Rik_chr7_73737929_73741024(-)_transcript=ENSMUST00000205693.1	A830073O21Rik	3096	2896.99	0.271644	0	0	No Change Low Expression	spliced
A830082N09Rik_chr10_33987216_33995055(-)_transcript=ENSMUST00000217778.1	A830082N09Rik	1412	1212.99	0.252544	0	0	No Change Low Expression	spliced
A930004D18Rik_chr2_18025193_18037737(-)_transcript=ENSMUST00000066163.2	A930004D18Rik	3217	3017.99	1.77683	2.409	1.62622	No Change Medium Expression	spliced
A930004J17Rik_chr4_131878628_131883237(+)_transcript=ENSMUST00000192689.1	A930004J17Rik	4610	4410.99	2.51346	0	0	No Change Medium Expression	spliced
A930005H10Rik_chr3_115881581_115888130(-)_transcript=ENSMUST00000187055.1	A930005H10Rik	436	236.994	1.12473	0.0997681	0.0006576	No Change Medium Expression	spliced
A930006K02Rik_chr16_91465025_91470128(+)_transcript=ENSMUST00000231422.1	A930006K02Rik	1151	951.994	0.411303	0	0	No Change Low Expression	spliced
A930007A09Rik_chr16_13754566_13758537(+)_transcript=ENSMUST00000239037.1	A930007A09Rik	3972	3772.99	1.99792	0	0	No Change Medium Expression	spliced
A930015D03Rik_chr17_35994453_36038435(+)_transcript=ENSMUST00000173900.1	A930015D03Rik	1111	911.994	1.20175	2.22665	1.38248	No Change Medium Expression	spliced
A930023M06Rik_chr12_117602039_117603763(+)_transcript=ENSMUST00000223270.1	A930023M06Rik	1093	893.994	0.133428	0	0	No Change Low Expression	spliced
A930024E05Rik_chr5_122989354_122998345(+)_transcript=ENSMUST00000148466.1	A930024E05Rik	1896	1696.99	2.60248	0.694933	0.472198	Down	spliced
A930037H05Rik_chr11_119448788_119491298(-)_transcript=ENSMUST00000207446.1	A930037H05Rik	4320	4120.99	0.334441	3.45463	2.34588	No Change Low Expression	spliced
AA386476_chr8_47675391_47685239(+)_transcript=ENSMUST00000098781.2	AA386476	1665	1465.99	1.68416	0	0	No Change Medium Expression	spliced
AA413626_chr11_4918510_4919003(+)_transcript=ENSMUST00000121125.1	AA413626	494	294.994	1.00695	0.854467	0.673819	No Change Medium Expression	spliced
AA414768_chrX_12936872_12938128(+)_transcript=ENSMUST00000121924.1	AA414768	1257	1057.99	0.859306	0.56146	0.369603	No Change Low Expression	spliced
AA465934_chr11_83291699_83294632(+)_transcript=ENSMUST00000176545.1	AA465934	356	157.142	2.22271	0	0	No Change Medium Expression	spliced
AA467197_chr2_122636986_122641191(+)_transcript=ENSMUST00000110512.3	AA467197	751	551.994	6.6819	0	0	No Change Medium Expression	spliced
AA474408_chr7_110057987_110061325(-)_transcript=ENSMUST00000098110.2	AA474408	3339	3139.99	0.782187	0	-0.0153485	No Change Low Expression	spliced
AA914427_chr16_17922043_17923208(+)_transcript=ENSMUST00000193194.1	AA914427	1166	966.994	0.642483	0	0	No Change Low Expression	spliced
AA986860_chr1_130731976_130744622(+)_transcript=ENSMUST00000039323.7	AA986860	2909	2709.99	0.750061	0	0	No Change Low Expression	spliced
Aaas_chr15_102338252_102350771(-)_transcript=ENSMUST00000041208.8	Aaas	1811	1611.99	60.7517	0	-0.0153485	No Change High Expression	spliced
Aacs_chr5_125475814_125517410(+)_transcript=ENSMUST00000031445.4	Aacs	3239	3039.99	10.231	0.0959761	-0.103381	No Change Medium Expression	spliced
Aagab_chr9_63602660_63644588(+)_transcript=ENSMUST00000041551.8	Aagab	5294	5094.99	6.32311	1.35326	0.770016	No Change Medium Expression	spliced
Aak1_chr6_86849517_87003223(+)_transcript=ENSMUST00000089519.12	Aak1	19341	19142	3.80984	0	0	No Change Medium Expression	spliced
Aamdc_chr7_97550331_97579497(-)_transcript=ENSMUST00000124552.2	Aamdc	618	418.994	4.76979	0.0383904	0.0115305	No Change Medium Expression	spliced
Aamp_chr1_74279840_74284738(-)_transcript=ENSMUST00000006462.13	Aamp	1817	1617.99	55.3045	0	0	No Change High Expression	spliced
Aar2_chr2_156547584_156568972(+)_transcript=ENSMUST00000109570.7	Aar2	2766	2566.99	10.5207	0	0	No Change Medium Expression	spliced
Aard_chr15_52040107_52045722(+)_transcript=ENSMUST00000090025.4	Aard	1348	1148.99	13.5701	0.0776603	-0.0824817	No Change Medium Expression	spliced
Aars_chr8_111033144_111057664(+)_transcript=ENSMUST00000034441.7	Aars	5750	5550.99	152.373	0.0111783	-0.0195187	No Change High Expression	spliced
Aars2_chr17_45506841_45520843(+)_transcript=ENSMUST00000024733.8	Aars2	3349	3149.99	11.1615	3.01517	0.62092	No Change Medium Expression	spliced
Aasdh_chr5_76873659_76905514(-)_transcript=ENSMUST00000120963.7	Aasdh	3694	3494.99	8.39056	0	0	No Change Medium Expression	spliced
Aasdhppt_chr9_4294793_4309471(-)_transcript=ENSMUST00000051589.8	Aasdhppt	2843	2643.99	19.8399	0	0	No Change High Expression	spliced
Aass_chr6_23072173_23132986(-)_transcript=ENSMUST00000031707.13	Aass	3701	3501.99	1.31163	0	0	No Change Medium Expression	spliced
Aatf_chr11_84422855_84513522(-)_transcript=ENSMUST00000018841.2	Aatf	1822	1622.99	54.2834	9.76854	4.50087	No Change High Expression	spliced
Aatk_chr11_120007313_120047167(-)_transcript=ENSMUST00000103019.1	Aatk	5177	4977.99	0.316216	0	0	No Change Low Expression	spliced
Abat_chr16_8513429_8621568(+)_transcript=ENSMUST00000065987.13	Abat	4636	4436.99	0.825637	0	-0.0153485	No Change Low Expression	spliced
Abca1_chr4_53030787_53159895(-)_transcript=ENSMUST00000030010.3	Abca1	10262	10063	1.47321	0	0	No Change Medium Expression	spliced
Abca2_chr2_25428703_25448540(+)_transcript=ENSMUST00000102919.3	Abca2	8033	7833.99	8.26159	0	0	No Change Medium Expression	spliced
Abca3_chr17_24351950_24410201(+)_transcript=ENSMUST00000039013.14	Abca3	6476	6276.99	3.29581	0	0	No Change Medium Expression	spliced
Abca4_chr3_122044443_122180123(+)_transcript=ENSMUST00000013995.12	Abca4	7263	7063.99	0.419377	0	0	No Change Low Expression	spliced
Abca5_chr11_110269369_110337716(-)_transcript=ENSMUST00000043961.11	Abca5	8231	8031.99	0.727566	0	0	No Change Low Expression	spliced
Abca7_chr10_79996494_80015572(+)_transcript=ENSMUST00000132517.7	Abca7	6696	6496.99	3.08469	0	0	Up	spliced
Abca8b_chr11_109932190_109995845(-)_transcript=ENSMUST00000020948.14	Abca8b	7423	7223.99	0.161077	0	0	No Change Low Expression	spliced
Abcb10_chr8_123952459_123983122(-)_transcript=ENSMUST00000075578.6	Abcb10	4306	4106.99	14.6358	0	0	No Change Medium Expression	spliced
Abcb1a_chr5_8660077_8748575(+)_transcript=ENSMUST00000047753.4	Abcb1a	4997	4797.99	6.4691	0.0658273	-0.121847	No Change Medium Expression	spliced
Abcb1b_chr5_8798147_8866315(+)_transcript=ENSMUST00000009058.9	Abcb1b	4306	4106.99	9.77946	1.35311	0.22516	No Change Medium Expression	spliced
Abcb6_chr1_75171717_75180392(-)_transcript=ENSMUST00000027396.14	Abcb6	2966	2766.99	5.66454	0	0	No Change Medium Expression	spliced
Abcb7_chrX_104280657_104413856(-)_transcript=ENSMUST00000033695.5	Abcb7	5667	5467.99	20.745	0.448187	-0.153756	No Change High Expression	spliced
Abcb8_chr5_24393663_24410054(+)_transcript=ENSMUST00000073076.11	Abcb8	2939	2739.99	6.46534	0	0	No Change Medium Expression	spliced
Abcb9_chr5_124061530_124095798(-)_transcript=ENSMUST00000031354.10	Abcb9	3661	3461.99	0.239483	0	0	No Change Low Expression	spliced
Abcc1_chr16_14361558_14475737(+)_transcript=ENSMUST00000100167.9	Abcc1	6792	6592.99	13.2245	0.234101	-0.132937	No Change Medium Expression	spliced
Abcc10_chr17_46303221_46328352(-)_transcript=ENSMUST00000167360.7	Abcc10	4866	4666.99	1.94128	0	0	No Change Medium Expression	spliced
Abcc2_chr19_43782192_43840740(+)_transcript=ENSMUST00000026208.5	Abcc2	8027	7827.99	0.486518	0	0	No Change Low Expression	spliced
Abcc3_chr11_94343295_94392997(-)_transcript=ENSMUST00000178136.7	Abcc3	5005	4805.99	0.515808	0	0	No Change Low Expression	spliced
Abcc4_chr14_118482692_118706219(-)_transcript=ENSMUST00000036554.13	Abcc4	5715	5515.99	25.3179	0	0	No Change High Expression	spliced
Abcc5_chr16_20331303_20426394(-)_transcript=ENSMUST00000079158.12	Abcc5	5811	5611.99	18.5853	0	0	No Change High Expression	spliced
Abcc8_chr7_46104523_46180033(-)_transcript=ENSMUST00000033123.7	Abcc8	4877	4677.99	1.22123	0.00959761	0.00959761	No Change Medium Expression	spliced
Abcd1_chrX_73716597_73738534(+)_transcript=ENSMUST00000002084.13	Abcd1	3648	3448.99	2.37704	0	0	No Change Medium Expression	spliced
Abcd2_chr15_91145871_91191799(-)_transcript=ENSMUST00000069511.7	Abcd2	5532	5332.99	0.15444	0	0	No Change Low Expression	spliced
Abcd3_chr3_121758774_121815302(-)_transcript=ENSMUST00000029770.7	Abcd3	3489	3289.99	14.0816	0	0	No Change Medium Expression	spliced
Abcd4_chr12_84601464_84617413(-)_transcript=ENSMUST00000021666.5	Abcd4	2309	2109.99	13.0521	0	0	No Change Medium Expression	spliced
Abce1_chr8_79683462_79711740(-)_transcript=ENSMUST00000080536.7	Abce1	3793	3593.99	196.537	0.0191952	0.0191952	No Change High Expression	spliced
Abcf1_chr17_35956819_35969761(-)_transcript=ENSMUST00000043757.14	Abcf1	3161	2961.99	76.6104	0	0	No Change High Expression	spliced
Abcf2_chr5_24565345_24577467(-)_transcript=ENSMUST00000030795.9	Abcf2	2569	2369.99	86.5108	0.0383904	0.0230419	No Change High Expression	spliced
Abcf3_chr16_20548577_20561379(+)_transcript=ENSMUST00000003319.5	Abcf3	3090	2890.99	14.1521	0.0383904	0.0383904	No Change Medium Expression	spliced
Abcg1_chr17_31057675_31117988(+)_transcript=ENSMUST00000024829.7	Abcg1	5832	5632.99	5.62361	0.0295259	-0.0472167	No Change Medium Expression	spliced
Abcg2_chr6_58584523_58695676(+)_transcript=ENSMUST00000114294.7	Abcg2	2178	1978.99	24.6325	0	0	Down	spliced
Abcg4_chr9_44273188_44288615(-)_transcript=ENSMUST00000034648.15	Abcg4	3476	3276.99	0.204964	0	0	No Change Low Expression	spliced
Abhd1_chr5_30950066_30955091(+)_transcript=ENSMUST00000201125.3	Abhd1	1352	1152.99	1.20373	0	0	No Change Medium Expression	spliced
Abhd10_chr16_45729725_45742955(-)_transcript=ENSMUST00000066983.12	Abhd10	2848	2648.99	5.12203	0	0	No Change Medium Expression	spliced
Abhd11_chr5_135009152_135012175(+)_transcript=ENSMUST00000111216.7	Abhd11	972	772.994	8.46176	0	0	No Change Medium Expression	spliced
Abhd11os_chr5_135012114_135013253(-)_transcript=ENSMUST00000136022.7	Abhd11os	604	404.994	1.86415	0	0	No Change Medium Expression	spliced
Abhd12_chr2_150832493_150904741(-)_transcript=ENSMUST00000056149.14	Abhd12	1999	1799.99	18.7609	0.191952	0.10431	No Change High Expression	spliced
Abhd13_chr8_9977707_9992155(+)_transcript=ENSMUST00000048216.5	Abhd13	5074	4874.99	8.60568	0	0	No Change Medium Expression	spliced
Abhd14a_chr9_106440051_106447678(-)_transcript=ENSMUST00000048685.12	Abhd14a	1256	1056.99	14.4718	0	0	No Change Medium Expression	spliced
Abhd14b_chr9_106447459_106452923(+)_transcript=ENSMUST00000213179.1	Abhd14b	1627	1427.99	1.65256	0	0	No Change Medium Expression	spliced
Abhd16a_chr17_35089263_35102987(+)_transcript=ENSMUST00000007251.13	Abhd16a	1945	1745.99	9.03347	0	0	No Change Medium Expression	spliced
Abhd17a_chr10_80583654_80590341(-)_transcript=ENSMUST00000003436.11	Abhd17a	1468	1268.99	27.3337	0	0	No Change High Expression	spliced
Abhd17b_chr19_21653185_21685637(+)_transcript=ENSMUST00000052556.4	Abhd17b	2259	2059.99	13.1514	0	0	No Change Medium Expression	spliced
Abhd17c_chr7_84109356_84151893(-)_transcript=ENSMUST00000117085.1	Abhd17c	2238	2038.99	31.0816	0.182355	-0.25897	Down	spliced
Abhd18_chr3_40846970_40938138(+)_transcript=ENSMUST00000203472.2	Abhd18	588	388.994	1.15298	0	0	No Change Medium Expression	spliced
Abhd2_chr7_79273199_79365508(+)_transcript=ENSMUST00000037315.12	Abhd2	6877	6677.99	17.2179	0.335916	-0.554298	No Change High Expression	spliced
Abhd3_chr18_10642092_10706771(-)_transcript=ENSMUST00000117726.8	Abhd3	1890	1690.99	0.25026	0	0	No Change Low Expression	spliced
Abhd4_chr14_54254188_54270637(+)_transcript=ENSMUST00000239403.1	Abhd4	2406	2206.99	29.9856	0	0	No Change High Expression	spliced
Abhd5_chr9_122351608_122381524(+)_transcript=ENSMUST00000156520.7	Abhd5	3157	2957.99	4.14673	0	0	No Change Medium Expression	spliced
Abhd6_chr14_8002902_8056763(+)_transcript=ENSMUST00000166497.8	Abhd6	2226	2026.99	3.58144	0	0	No Change Medium Expression	spliced
Abhd8_chr8_71456705_71463655(-)_transcript=ENSMUST00000008094.9	Abhd8	1978	1778.99	6.86366	0	0	No Change Medium Expression	spliced
Abi1_chr2_22940073_23040241(-)_transcript=ENSMUST00000140164.7	Abi1	3403	3203.99	10.3774	0	0	Down	spliced
Abi2_chr1_60409619_60481158(+)_transcript=ENSMUST00000052332.14	Abi2	5768	5568.99	19.7651	0	0	No Change High Expression	spliced
Abi3_chr11_95830074_95842476(-)_transcript=ENSMUST00000059026.9	Abi3	4006	3806.99	0.328534	0	0	No Change Low Expression	spliced
Abitram_chr4_56802345_56809601(+)_transcript=ENSMUST00000045368.11	Abitram	4275	4075.99	5.00294	0.117337	-0.142211	No Change Medium Expression	spliced
Abl1_chr2_31688376_31804227(+)_transcript=ENSMUST00000075759.12	Abl1	6327	6127.99	23.2866	0.0627942	0.0320972	No Change High Expression	spliced
Abl2_chr1_156558786_156649568(+)_transcript=ENSMUST00000166172.8	Abl2	10151	9951.99	24.5368	0.126598	0.0609754	No Change High Expression	spliced
Ablim1_chr19_57032733_57314919(-)_transcript=ENSMUST00000111529.7	Ablim1	5927	5727.99	1.95726	0	0	No Change Medium Expression	spliced
Ablim2_chr5_35757880_35884973(+)_transcript=ENSMUST00000114205.7	Ablim2	2579	2379.99	0.746613	0	0	No Change Low Expression	spliced
Ablim3_chr18_61799392_61911824(-)_transcript=ENSMUST00000166783.2	Ablim3	4187	3987.99	0.682552	0	0	No Change Low Expression	spliced
Abr_chr11_76416734_76623558(-)_transcript=ENSMUST00000108407.9	Abr	4811	4611.99	11.621	0	0	No Change Medium Expression	spliced
Abracl_chr10_18011260_18023288(-)_transcript=ENSMUST00000020002.8	Abracl	846	646.994	26.3323	0	0	No Change High Expression	spliced
Abraxas1_chr5_100805192_100820965(-)_transcript=ENSMUST00000117364.7	Abraxas1	1657	1457.99	16.1321	0	0	No Change High Expression	spliced
Abraxas2_chr7_132859225_132885111(+)_transcript=ENSMUST00000084497.11	Abraxas2	2892	2692.99	11.7106	0	0	No Change Medium Expression	spliced
Abt1_chr13_23418361_23423866(-)_transcript=ENSMUST00000041782.3	Abt1	4456	4256.99	8.01783	0	0	No Change Medium Expression	spliced
Abtb1_chr6_88835914_88841984(-)_transcript=ENSMUST00000032169.7	Abtb1	1845	1645.99	7.13385	0	0	No Change Medium Expression	spliced
Abtb2_chr2_103566310_103718423(+)_transcript=ENSMUST00000076212.3	Abtb2	4558	4358.99	1.36223	0.0191952	0.0191952	No Change Medium Expression	spliced
AC074312.1_chr7_27643098_27650268(+)_transcript=ENSMUST00000239103.1	AC074312.1	437	237.994	1.53758	0	0	No Change Medium Expression	spliced
AC106834.1_chr19_21121152_21248451(-)_transcript=ENSMUST00000235456.1	AC106834.1	1130	930.994	0.508187	0	0	No Change Low Expression	spliced
AC132288.1_chr19_47252243_47254332(+)_transcript=ENSMUST00000237690.1	AC132288.1	2090	1890.99	0.470974	0	0	No Change Low Expression	spliced
AC135859.1_chr10_128196071_128197594(+)_transcript=ENSMUST00000239116.1	AC135859.1	1524	1324.99	0.985087	0	0	No Change Low Expression	spliced
AC150312.1_chr7_111117779_111119594(-)_transcript=ENSMUST00000238860.1	AC150312.1	1816	1616.99	0.435633	1.14266	0.990886	No Change Low Expression	spliced
AC154542.1_chr17_86175575_86178029(+)_transcript=ENSMUST00000234087.1	AC154542.1	2455	2255.99	0.609843	0	0	No Change Low Expression	spliced
AC156021.1_chr5_27971317_27977050(+)_transcript=ENSMUST00000239249.1	AC156021.1	5734	5534.99	0.567742	0	0	No Change Low Expression	spliced
AC156546.1_chr18_43526177_43529880(-)_transcript=ENSMUST00000235649.1	AC156546.1	3704	3504.99	0.165438	0	0	No Change Low Expression	spliced
AC159819.1_chr9_56437457_56438444(+)_transcript=ENSMUST00000239472.1	AC159819.1	988	788.994	110.363	0	0	No Change High Expression	spliced
AC240460.1_chr7_3513936_3515365(-)_transcript=ENSMUST00000239381.1	AC240460.1	531	331.994	2.62872	0	0	No Change Medium Expression	spliced
Acaa1a_chr9_119339676_119350299(+)_transcript=ENSMUST00000039784.11	Acaa1a	1762	1562.99	8.90983	0	0	No Change Medium Expression	spliced
Acaa1b_chr9_119148023_119157093(-)_transcript=ENSMUST00000010795.4	Acaa1b	1689	1489.99	1.29042	0	0	No Change Medium Expression	spliced
Acaa2_chr18_74779197_74806208(+)_transcript=ENSMUST00000041053.10	Acaa2	1516	1316.99	10.7361	0	0	No Change Medium Expression	spliced
Acaca_chr11_84129672_84401651(+)_transcript=ENSMUST00000020843.12	Acaca	9026	8826.99	20.9707	0.134367	-0.202961	No Change High Expression	spliced
Acacb_chr5_114146535_114250761(+)_transcript=ENSMUST00000031583.14	Acacb	8482	8282.99	3.08999	0	0	No Change Medium Expression	spliced
Acad10_chr5_121621026_121660514(-)_transcript=ENSMUST00000111770.1	Acad10	3626	3426.99	2.91082	0	0	No Change Medium Expression	spliced
Acad11_chr9_104063377_104127725(+)_transcript=ENSMUST00000120854.7	Acad11	3108	2908.99	3.0828	0	0	No Change Medium Expression	spliced
Acad12_chr5_121596775_121618938(-)_transcript=ENSMUST00000041252.12	Acad12	3881	3681.99	1.57805	0	0	No Change Medium Expression	spliced
Acad8_chr9_26974135_26999566(-)_transcript=ENSMUST00000060513.7	Acad8	2859	2659.99	7.55809	0	0	No Change Medium Expression	spliced
Acad9_chr3_36065979_36092853(+)_transcript=ENSMUST00000011492.14	Acad9	3930	3730.99	11.0095	0	0	No Change Medium Expression	spliced
Acadl_chr1_66830839_66863277(-)_transcript=ENSMUST00000027153.5	Acadl	1916	1716.99	23.3041	0.786384	0.082521	No Change High Expression	spliced
Acadm_chr3_153922357_153944632(-)_transcript=ENSMUST00000072697.12	Acadm	2047	1847.99	42.6863	0	0	No Change High Expression	spliced
Acads_chr5_115110299_115119346(-)_transcript=ENSMUST00000031524.10	Acads	1870	1670.99	15.2143	0	0	No Change Medium Expression	spliced
Acadsb_chr7_131410601_131448944(+)_transcript=ENSMUST00000015829.14	Acadsb	6081	5881.99	5.73948	0	0	No Change Medium Expression	spliced
Acadvl_chr11_70010183_70015411(-)_transcript=ENSMUST00000102574.9	Acadvl	2168	1968.99	8.3172	0	0	No Change Medium Expression	spliced
Acan_chr7_79053483_79115099(+)_transcript=ENSMUST00000032835.6	Acan	7355	7155.99	2.4236	0.00959761	0.00959761	No Change Medium Expression	spliced
Acap1_chr11_69881567_69895539(-)_transcript=ENSMUST00000001631.6	Acap1	2482	2282.99	1.39865	0	0	No Change Medium Expression	spliced
Acap2_chr16_31092412_31201245(-)_transcript=ENSMUST00000058033.8	Acap2	6362	6162.99	10.6576	0	0	No Change Medium Expression	spliced
Acap3_chr4_155891822_155907251(+)_transcript=ENSMUST00000105584.9	Acap3	4365	4165.99	3.73766	0	0	No Change Medium Expression	spliced
Acat1_chr9_53580522_53610382(-)_transcript=ENSMUST00000034547.5	Acat1	3405	3205.99	4.85969	0	-0.0613941	No Change Medium Expression	spliced
Acat2_chr17_12942890_12960747(-)_transcript=ENSMUST00000007005.13	Acat2	2250	2050.99	21.0231	0	0	No Change High Expression	spliced
Acat3_chr17_12923813_12940600(-)_transcript=ENSMUST00000043923.11	Acat3	2123	1923.99	0.428813	0	0	No Change Low Expression	spliced
Acbd3_chr1_180726043_180754204(+)_transcript=ENSMUST00000027780.5	Acbd3	3471	3271.99	16.0638	0	0	No Change High Expression	spliced
Acbd4_chr11_103101682_103112200(+)_transcript=ENSMUST00000024492.14	Acbd4	2075	1875.99	4.10137	0	0	Up	spliced
Acbd5_chr2_23068167_23115558(+)_transcript=ENSMUST00000155602.3	Acbd5	1712	1512.99	4.56996	0	0	No Change Medium Expression	spliced
Acbd6_chr1_155558120_155691330(+)_transcript=ENSMUST00000080138.12	Acbd6	993	793.994	19.6083	0	0	No Change High Expression	spliced
Acbd7_chr2_3336168_3340993(+)_transcript=ENSMUST00000115089.1	Acbd7	531	331.994	0.72778	0	0	No Change Low Expression	spliced
Accs_chr2_93833467_93849943(-)_transcript=ENSMUST00000068513.10	Accs	1872	1672.99	1.61082	0	0	No Change Medium Expression	spliced
Accsl_chr2_93855361_93869157(-)_transcript=ENSMUST00000099690.3	Accsl	2224	2024.99	1.61496	0	0	No Change Medium Expression	spliced
Acd_chr8_105695860_105701102(-)_transcript=ENSMUST00000042608.7	Acd	3154	2954.99	7.69597	0.00959761	0.00959761	No Change Medium Expression	spliced
Ace_chr11_105967945_105989964(+)_transcript=ENSMUST00000001964.7	Ace	2418	2218.99	0.190094	0	0	No Change Low Expression	spliced
Acer1_chr17_56953490_56982126(-)_transcript=ENSMUST00000056113.4	Acer1	2429	2229.99	0.278928	0	0	No Change Low Expression	spliced
Acer2_chr4_86874396_86934822(+)_transcript=ENSMUST00000045224.13	Acer2	4216	4016.99	0.946735	0	0	No Change Low Expression	spliced
Acer3_chr7_98206389_98321208(-)_transcript=ENSMUST00000120520.7	Acer3	3964	3764.99	2.68427	0.00959761	-0.00575089	No Change Medium Expression	spliced
Acin1_chr14_54642161_54686931(-)_transcript=ENSMUST00000126166.7	Acin1	2369	2169.99	45.019	0	0	No Change High Expression	spliced
Ackr3_chr1_90203980_90216751(+)_transcript=ENSMUST00000065587.4	Ackr3	3065	2865.99	0.943868	0	0	No Change Low Expression	spliced
Ackr4_chr9_104084157_104126933(-)_transcript=ENSMUST00000076147.5	Ackr4	2389	2189.99	0.464181	0	0	No Change Low Expression	spliced
Acly_chr11_100476353_100528000(-)_transcript=ENSMUST00000107389.7	Acly	4426	4226.99	55.4285	0	0	Up	spliced
Aco1_chr4_40143081_40198338(+)_transcript=ENSMUST00000102973.3	Aco1	3832	3632.99	17.3671	0	0	No Change High Expression	spliced
Aco2_chr15_81872309_81915133(+)_transcript=ENSMUST00000023116.6	Aco2	2918	2718.99	85.6412	0	0	No Change High Expression	spliced
Acot1_chr12_84009490_84018371(+)_transcript=ENSMUST00000168120.2	Acot1	2272	2072.99	11.1244	0	-0.0153485	Up	spliced
Acot11_chr4_106744555_106804998(-)_transcript=ENSMUST00000102762.9	Acot11	5689	5489.99	0.697491	0	0	No Change Low Expression	spliced
Acot13_chr13_24817948_24831540(-)_transcript=ENSMUST00000006900.6	Acot13	721	521.994	22.1649	0	0	No Change High Expression	spliced
Acot2_chr12_83987861_83993873(+)_transcript=ENSMUST00000021649.7	Acot2	2196	1996.99	4.68373	0	0	No Change Medium Expression	spliced
Acot3_chr12_84052144_84060402(+)_transcript=ENSMUST00000120927.7	Acot3	1854	1654.99	0.749267	0	0	No Change Low Expression	spliced
Acot6_chr12_84100654_84111349(+)_transcript=ENSMUST00000056822.3	Acot6	3388	3188.99	0.367859	0	0	No Change Low Expression	spliced
Acot7_chr4_152178134_152271855(+)_transcript=ENSMUST00000105652.2	Acot7	1393	1193.99	12.7107	0	0	No Change Medium Expression	spliced
Acot8_chr2_164792765_164804882(-)_transcript=ENSMUST00000103094.10	Acot8	1152	952.994	7.74237	0	0	No Change Medium Expression	spliced
Acot9_chrX_155262443_155297654(+)_transcript=ENSMUST00000026324.9	Acot9	1752	1552.99	41.5058	0.364709	-0.310626	No Change High Expression	spliced
Acox1_chr11_116171888_116199045(-)_transcript=ENSMUST00000066587.11	Acox1	3987	3787.99	5.37571	0	0	No Change Medium Expression	spliced
Acox3_chr5_35583040_35615352(+)_transcript=ENSMUST00000068947.13	Acox3	3976	3776.99	3.47706	4.72621	2.56133	No Change Medium Expression	spliced
Acoxl_chr2_127838876_128123873(+)_transcript=ENSMUST00000028859.7	Acoxl	2842	2642.99	0.269169	0	0	No Change Low Expression	spliced
Acp1_chr12_30893326_30911589(-)_transcript=ENSMUST00000074038.6	Acp1	2754	2554.99	31.7128	0	0	No Change High Expression	spliced
Acp2_chr2_91202885_91214098(+)_transcript=ENSMUST00000239169.1	Acp2	4652	4452.99	3.99102	5.95279	3.32868	No Change Medium Expression	spliced
Acp5_chr9_22126727_22135711(-)_transcript=ENSMUST00000069330.13	Acp5	1356	1156.99	4.0157	0	0	Up	spliced
Acp6_chr3_97158777_97177299(+)_transcript=ENSMUST00000090759.4	Acp6	1754	1554.99	32.3847	0	0	Up	spliced
Acp7_chr7_28607276_28631332(-)_transcript=ENSMUST00000159560.2	Acp7	2207	2007.99	0.5133	0	0	No Change Low Expression	spliced
Acpp_chr9_104288251_104337748(-)_transcript=ENSMUST00000062723.13	Acpp	4483	4283.99	0.348921	0	0	No Change Low Expression	spliced
Acrbp_chr6_125049689_125063267(+)_transcript=ENSMUST00000112414.7	Acrbp	1498	1298.99	4.4922	0	0	No Change Medium Expression	spliced
Acsbg2_chr17_56843103_56874447(-)_transcript=ENSMUST00000043062.4	Acsbg2	2609	2409.99	0.382303	0	0	No Change Low Expression	spliced
Acsbg3_chr17_56875477_56888904(+)_transcript=ENSMUST00000025048.6	Acsbg3	2677	2477.99	6.54483	0.0191952	0.0191952	No Change Medium Expression	spliced
Acsf2_chr11_94557102_94601871(-)_transcript=ENSMUST00000103164.3	Acsf2	3154	2954.99	9.67178	0	0	Up	spliced
Acsf3_chr8_122775486_122817880(+)_transcript=ENSMUST00000015160.5	Acsf3	2206	2006.99	4.69143	3.01389e-10	-1.1929e-08	No Change Medium Expression	spliced
Acsl1_chr8_46471037_46536051(+)_transcript=ENSMUST00000034046.12	Acsl1	3897	3697.99	11.9339	0	-0.0748345	No Change Medium Expression	spliced
Acsl3_chr1_78657825_78707743(+)_transcript=ENSMUST00000142704.7	Acsl3	2976	2776.99	39.1704	0.477289	-0.013864	Down	spliced
Acsl4_chrX_142317993_142390535(-)_transcript=ENSMUST00000112907.7	Acsl4	5137	4937.99	10.0758	0	0	Down	spliced
Acsl5_chr19_55251938_55297720(+)_transcript=ENSMUST00000043150.5	Acsl5	4243	4043.99	10.3204	0.126521	0.003733	No Change Medium Expression	spliced
Acsl6_chr11_54303798_54364756(+)_transcript=ENSMUST00000094194.9	Acsl6	2554	2354.99	0.743786	0	0	No Change Low Expression	spliced
Acss1_chr2_150618105_150668500(-)_transcript=ENSMUST00000028944.3	Acss1	3618	3418.99	8.00811	0.0767809	3.83e-05	No Change Medium Expression	spliced
Acss2_chr2_155517948_155585724(+)_transcript=ENSMUST00000029135.14	Acss2	2931	2731.99	3.52365	0	0	No Change Medium Expression	spliced
Acss3_chr10_106933517_107123668(-)_transcript=ENSMUST00000165067.8	Acss3	4696	4496.99	0.288308	0	0	No Change Low Expression	spliced
Acta1_chr8_123891769_123894751(-)_transcript=ENSMUST00000034453.5	Acta1	1446	1246.99	5.40645	0	0	No Change Medium Expression	spliced
Acta2_chr19_34241090_34255590(-)_transcript=ENSMUST00000039631.9	Acta2	2035	1835.99	9.83996	0	0	Down	spliced
Actb_chr5_142903115_142906754(-)_transcript=ENSMUST00000100497.10	Actb	1920	1720.99	2212.06	0.073086	-0.160672	Down	spliced
Actb-ps1_chrX_152489661_152491860(-)_transcript=ENSMUST00000140208.1	Actb-ps1	2200	2000.99	0.176961	0	0	No Change Low Expression	spliced
Actc1_chr2_114047282_114053548(-)_transcript=ENSMUST00000090269.6	Actc1	1473	1273.99	1.02825	0	0	No Change Medium Expression	spliced
Actg1_chr11_120345690_120348542(-)_transcript=ENSMUST00000106215.10	Actg1	1827	1627.99	956.236	0.0286974	0.0286974	No Change High Expression	spliced
Actl6a_chr3_32706298_32726973(+)_transcript=ENSMUST00000029214.13	Actl6a	2010	1810.99	98.3615	0	-0.0153485	No Change High Expression	spliced
Actl7b_chr4_56740005_56741443(-)_transcript=ENSMUST00000095080.4	Actl7b	1439	1239.99	0.400826	0	0	No Change Low Expression	spliced
Actn1_chr12_80167547_80260371(-)_transcript=ENSMUST00000021554.15	Actn1	3734	3534.99	58.548	0	-0.0317277	No Change High Expression	spliced
Actn2_chr13_12269426_12340760(-)_transcript=ENSMUST00000064204.13	Actn2	3013	2813.99	1.53977	0	0	No Change Medium Expression	spliced
Actn3_chr19_4861216_4877909(-)_transcript=ENSMUST00000006626.4	Actn3	2887	2687.99	8.67074	0	0	No Change Medium Expression	spliced
Actn4_chr7_28893248_28962340(-)_transcript=ENSMUST00000068045.13	Actn4	3877	3677.99	178.933	0	0	No Change High Expression	spliced
Actr10_chr12_70937857_70964718(+)_transcript=ENSMUST00000021479.5	Actr10	4022	3822.99	13.0551	0	0	No Change Medium Expression	spliced
Actr1a_chr19_46376811_46395748(-)_transcript=ENSMUST00000040270.5	Actr1a	2757	2557.99	32.8839	0	0	No Change High Expression	spliced
Actr1b_chr1_36698114_36714422(-)_transcript=ENSMUST00000043951.9	Actr1b	3248	3048.99	34.1188	0.00959761	0.00959761	No Change High Expression	spliced
Actr2_chr11_20062304_20112913(-)_transcript=ENSMUST00000000137.7	Actr2	3631	3431.99	125.051	0	0	No Change High Expression	spliced
Actr3_chr1_125392905_125435727(-)_transcript=ENSMUST00000027579.16	Actr3	2554	2354.99	70.7404	0	0	No Change High Expression	spliced
Actr3-ps_chrX_81820384_81822730(-)_transcript=ENSMUST00000118948.1	Actr3-ps	2347	2147.99	6.61192	0	0	No Change Medium Expression	spliced
Actr3b_chr5_25759997_25850688(+)_transcript=ENSMUST00000128727.7	Actr3b	2031	1831.99	6.89668	0	0	No Change Medium Expression	spliced
Actr5_chr2_158624888_158639211(+)_transcript=ENSMUST00000045644.8	Actr5	2402	2202.99	3.82662	0	0	No Change Medium Expression	spliced
Actr6_chr10_89711971_89732295(-)_transcript=ENSMUST00000020109.4	Actr6	1705	1505.99	9.79196	0.00959761	0.00959761	No Change Medium Expression	spliced
Actr8_chr14_29978337_30006354(+)_transcript=ENSMUST00000016115.5	Actr8	2119	1919.99	25.3268	0	0	No Change High Expression	spliced
Acvr1_chr2_58388644_58567157(-)_transcript=ENSMUST00000112599.7	Acvr1	2891	2691.99	3.80483	0	0	No Change Medium Expression	spliced
Acvr1b_chr15_101174067_101213684(+)_transcript=ENSMUST00000000544.11	Acvr1b	4418	4218.99	10.2145	0	0	No Change Medium Expression	spliced
Acvr2a_chr2_48814109_48903269(+)_transcript=ENSMUST00000063886.3	Acvr2a	5686	5486.99	5.32635	0.0191952	-0.134102	No Change Medium Expression	spliced
Acvr2b_chr9_119402118_119434995(+)_transcript=ENSMUST00000215746.1	Acvr2b	3175	2975.99	27.1695	0	0	No Change High Expression	spliced
Acvrl1_chr15_101128522_101145336(+)_transcript=ENSMUST00000120754.1	Acvrl1	3506	3306.99	0.457236	0	0	No Change Low Expression	spliced
Acy1_chr9_106432981_106438319(-)_transcript=ENSMUST00000024031.12	Acy1	1529	1329.99	16.2199	0	0	No Change High Expression	spliced
Acy3_chr19_3986570_3990007(+)_transcript=ENSMUST00000054030.7	Acy3	1505	1305.99	1.08667	0	0	No Change Medium Expression	spliced
Acyp1_chr12_85272398_85288438(-)_transcript=ENSMUST00000008966.12	Acyp1	648	448.994	2.88268	0	0	No Change Medium Expression	spliced
Acyp2_chr11_30505991_30649587(-)_transcript=ENSMUST00000074613.3	Acyp2	863	663.994	1.08128	0.0479881	0.0479881	No Change Medium Expression	spliced
Ada_chr2_163726584_163750239(-)_transcript=ENSMUST00000017841.3	Ada	1688	1488.99	4.55417	0.185126	-0.169511	No Change Medium Expression	spliced
Adad2_chr8_119612747_119616924(+)_transcript=ENSMUST00000098361.3	Adad2	1926	1726.99	3.04785	0	0	No Change Medium Expression	spliced
Adal_chr2_121140428_121156680(+)_transcript=ENSMUST00000119031.7	Adal	2477	2277.99	6.27743	0	0	No Change Medium Expression	spliced
Adam10_chr9_70678997_70780229(+)_transcript=ENSMUST00000067880.12	Adam10	4593	4393.99	18.1409	0.0575857	-0.141945	No Change High Expression	spliced
Adam11_chr11_102761439_102780262(+)_transcript=ENSMUST00000068150.6	Adam11	5102	4902.99	1.23716	0	0	No Change Medium Expression	spliced
Adam12_chr7_133883199_134232146(-)_transcript=ENSMUST00000067680.10	Adam12	7675	7475.99	0.190816	0	0	No Change Low Expression	spliced
Adam15_chr3_89338542_89349996(-)_transcript=ENSMUST00000074582.6	Adam15	2799	2599.99	2.80246	0	0	No Change Medium Expression	spliced
Adam17_chr12_21323509_21373632(-)_transcript=ENSMUST00000064536.12	Adam17	4443	4243.99	19.0792	0	0	No Change High Expression	spliced
Adam19_chr11_46055992_46147343(+)_transcript=ENSMUST00000011400.7	Adam19	6383	6183.99	35.3133	0	0	Up	spliced
Adam1a_chr5_121518576_121545482(-)_transcript=ENSMUST00000200170.1	Adam1a	4783	4583.99	0.614548	0	0	No Change Low Expression	spliced
Adam22_chr5_8072352_8368160(-)_transcript=ENSMUST00000046838.13	Adam22	2773	2573.99	1.93572	0.249538	-0.072781	No Change Medium Expression	spliced
Adam23_chr1_63445891_63596276(+)_transcript=ENSMUST00000114103.7	Adam23	2655	2455.99	14.0852	0.557636	-0.547724	Down	spliced
Adam33_chr2_131050591_131063814(-)_transcript=ENSMUST00000052104.9	Adam33	2795	2595.99	0.140108	0	0	No Change Low Expression	spliced
Adam4_chr12_81419443_81421946(-)_transcript=ENSMUST00000085319.3	Adam4	2504	2304.99	0.731689	4.14449	3.379	No Change Low Expression	spliced
Adam8_chr7_139978932_139992562(-)_transcript=ENSMUST00000106069.8	Adam8	3117	2917.99	1.28999	0	0	No Change Medium Expression	spliced
Adam9_chr8_24949611_25016927(-)_transcript=ENSMUST00000084032.5	Adam9	3834	3634.99	9.02913	0	0	No Change Medium Expression	spliced
Adamts1_chr16_85793827_85803113(-)_transcript=ENSMUST00000023610.14	Adamts1	4884	4684.99	1.97444	2.4282	1.75286	No Change Medium Expression	spliced
Adamts10_chr17_33524204_33553782(+)_transcript=ENSMUST00000087623.12	Adamts10	4043	3843.99	2.29209	0.045875	0.045875	No Change Medium Expression	spliced
Adamts14_chr10_61197112_61273438(-)_transcript=ENSMUST00000092486.10	Adamts14	5188	4988.99	3.43005	0	0	Up	spliced
Adamts15_chr9_30899155_30922452(-)_transcript=ENSMUST00000065112.6	Adamts15	5928	5728.99	1.12271	0.00959761	0.00959761	No Change Medium Expression	spliced
Adamts17_chr7_66839735_67153171(+)_transcript=ENSMUST00000098382.9	Adamts17	6025	5825.99	0.139352	0	0	No Change Low Expression	spliced
Adamts19_chr18_58836667_59054060(+)_transcript=ENSMUST00000052907.6	Adamts19	5145	4945.99	0.563963	0.0220634	0.0110907	No Change Low Expression	spliced
Adamts2_chr11_50602084_50807573(+)_transcript=ENSMUST00000142118.2	Adamts2	5079	4879.99	0.309763	0.0191952	-0.0115018	No Change Low Expression	spliced
Adamts20_chr15_94270163_94465418(-)_transcript=ENSMUST00000155907.1	Adamts20	6886	6686.99	0.211404	0	0	No Change Low Expression	spliced
Adamts3_chr5_89677087_89883334(-)_transcript=ENSMUST00000061427.9	Adamts3	3934	3734.99	0.450963	0	0	No Change Low Expression	spliced
Adamts4_chr1_171250421_171260637(+)_transcript=ENSMUST00000219033.1	Adamts4	4386	4186.99	0.606517	0	0	No Change Low Expression	spliced
Adamts6_chr13_104287835_104496695(+)_transcript=ENSMUST00000065766.6	Adamts6	4822	4622.99	0.803564	0	0	Down	spliced
Adamts7_chr9_90163069_90208071(+)_transcript=ENSMUST00000113060.2	Adamts7	5098	4898.99	1.10848	0	0	No Change Medium Expression	spliced
Adamts8_chr9_30942562_30963838(+)_transcript=ENSMUST00000068135.12	Adamts8	3631	3431.99	0.540744	0	0	No Change Low Expression	spliced
Adamts9_chr6_92772699_92943492(-)_transcript=ENSMUST00000113438.7	Adamts9	8016	7816.99	5.04099	0.220745	-0.255059	No Change Medium Expression	spliced
Adamtsl1_chr4_85514172_86428385(+)_transcript=ENSMUST00000120678.1	Adamtsl1	977	777.994	0.557131	0	-0.0136084	No Change Low Expression	spliced
Adamtsl4_chr3_95676201_95687917(-)_transcript=ENSMUST00000015994.3	Adamtsl4	3856	3656.99	0.694325	0	0	No Change Low Expression	spliced
Adamtsl5_chr10_80339110_80348412(-)_transcript=ENSMUST00000105352.1	Adamtsl5	989	789.994	1.22497	0	0	No Change Medium Expression	spliced
Adap1_chr5_139271876_139325622(-)_transcript=ENSMUST00000110865.1	Adap1	2557	2357.99	9.34386	0.191952	-0.114655	No Change Medium Expression	spliced
Adap2_chr11_80154105_80178958(+)_transcript=ENSMUST00000021050.13	Adap2	1785	1585.99	2.56687	0	0	No Change Medium Expression	spliced
Adar_chr3_89715022_89753446(+)_transcript=ENSMUST00000098924.8	Adar	5909	5709.99	8.81797	1.02671	-0.55146	No Change Medium Expression	spliced
Adarb1_chr10_77290726_77418270(-)_transcript=ENSMUST00000020496.13	Adarb1	6549	6349.99	2.19621	4.71806	2.77274	No Change Medium Expression	spliced
Adat1_chr8_111966908_111992302(-)_transcript=ENSMUST00000139820.7	Adat1	2762	2562.99	9.0109	0	0	No Change Medium Expression	spliced
Adat2_chr10_13552894_13563376(+)_transcript=ENSMUST00000019944.8	Adat2	1466	1266.99	7.63812	0	0	No Change Medium Expression	spliced
Adck1_chr12_88360554_88461724(+)_transcript=ENSMUST00000222695.1	Adck1	2253	2053.99	4.78599	0	0	No Change Medium Expression	spliced
Adck2_chr6_39573873_39588769(+)_transcript=ENSMUST00000051249.12	Adck2	2287	2087.99	1.36792	0	0	No Change Medium Expression	spliced
Adck5_chr15_76576358_76595816(+)_transcript=ENSMUST00000162503.7	Adck5	2040	1840.99	7.51158	0	0	No Change Medium Expression	spliced
Adcy1_chr11_7063489_7178506(+)_transcript=ENSMUST00000020706.4	Adcy1	12259	12060	3.31754	0.355112	-0.197435	No Change Medium Expression	spliced
Adcy2_chr13_68620043_68999541(-)_transcript=ENSMUST00000022013.7	Adcy2	4211	4011.99	0.84214	0.0383904	-0.0076552	No Change Low Expression	spliced
Adcy3_chr12_4133103_4213525(+)_transcript=ENSMUST00000020984.8	Adcy3	4348	4148.99	3.49668	0	0	No Change Medium Expression	spliced
Adcy4_chr14_55769057_55784095(-)_transcript=ENSMUST00000002398.8	Adcy4	3444	3244.99	0.289215	0	0	No Change Low Expression	spliced
Adcy5_chr16_35154877_35305738(+)_transcript=ENSMUST00000114913.2	Adcy5	7008	6808.99	0.413393	0.00959761	-0.0197328	No Change Low Expression	spliced
Adcy6_chr15_98589973_98610076(-)_transcript=ENSMUST00000096224.5	Adcy6	6038	5838.99	3.32783	0	0	No Change Medium Expression	spliced
Adcy7_chr8_88272403_88329962(+)_transcript=ENSMUST00000169037.8	Adcy7	5198	4998.99	0.763582	0.0191952	0.0038467	No Change Low Expression	spliced
Adcy9_chr16_4287529_4420498(-)_transcript=ENSMUST00000117801.7	Adcy9	4507	4307.99	1.85611	7.89509	4.90943	No Change Medium Expression	spliced
Adcyap1r1_chr6_55451978_55501451(+)_transcript=ENSMUST00000070756.11	Adcyap1r1	6107	5907.99	0.284241	0	0	No Change Low Expression	spliced
Add1_chr5_34573664_34632308(+)_transcript=ENSMUST00000114340.8	Add1	3761	3561.99	31.435	0	0	No Change High Expression	spliced
Add3_chr19_53140443_53247399(+)_transcript=ENSMUST00000237430.1	Add3	4054	3854.99	10.5265	0	0	No Change Medium Expression	spliced
Adgra2_chr8_27085583_27123436(+)_transcript=ENSMUST00000033876.13	Adgra2	5760	5560.99	3.57668	0	0	No Change Medium Expression	spliced
Adgra3_chr5_49959956_50059006(-)_transcript=ENSMUST00000030971.6	Adgra3	4480	4280.99	24.7311	0.182355	-0.047873	No Change High Expression	spliced
Adgrb1_chr15_74516195_74589465(+)_transcript=ENSMUST00000185682.6	Adgrb1	2744	2544.99	1.54125	0	0	No Change Medium Expression	spliced
Adgrb2_chr4_129984870_130022633(+)_transcript=ENSMUST00000106015.8	Adgrb2	4982	4782.99	1.56736	0	0	No Change Medium Expression	spliced
Adgrb3_chr1_25067476_25829707(-)_transcript=ENSMUST00000151309.7	Adgrb3	5448	5248.99	0.650203	1.30308	0.833144	No Change Low Expression	spliced
Adgrd1_chr5_129096750_129204599(+)_transcript=ENSMUST00000056617.13	Adgrd1	5163	4963.99	0.653378	0	0	No Change Low Expression	spliced
Adgre5_chr8_83723251_83741326(-)_transcript=ENSMUST00000109802.2	Adgre5	2867	2667.99	8.38152	0	0	Up	spliced
Adgrf4_chr17_42656891_42692284(-)_transcript=ENSMUST00000167993.7	Adgrf4	2983	2783.99	0.270913	0	0	No Change Low Expression	spliced
Adgrf5_chr17_43360451_43459557(+)_transcript=ENSMUST00000226087.1	Adgrf5	4954	4754.99	0.692665	0	0	No Change Low Expression	spliced
Adgrg1_chr8_94974751_95014217(+)_transcript=ENSMUST00000093271.7	Adgrg1	3574	3374.99	16.1122	0	-0.030697	No Change High Expression	spliced
Adgrg2_chrX_160390690_160498070(+)_transcript=ENSMUST00000112401.7	Adgrg2	4632	4432.99	0.285746	0	0	No Change Low Expression	spliced
Adgrg5_chr8_94923694_94943280(+)_transcript=ENSMUST00000074570.9	Adgrg5	2802	2602.99	0.210433	0	0	No Change Low Expression	spliced
Adgrg6_chr10_14402583_14545659(-)_transcript=ENSMUST00000041168.5	Adgrg6	6507	6307.99	2.5289	0	0	No Change Medium Expression	spliced
Adgrl1_chr8_83900105_83941954(+)_transcript=ENSMUST00000141158.7	Adgrl1	8181	7981.99	31.9453	0	0	No Change High Expression	spliced
Adgrl2_chr3_148815583_148990555(-)_transcript=ENSMUST00000200543.4	Adgrl2	5509	5309.99	33.924	1.02536e-09	-2.71275e-08	Down	spliced
Adgrl3_chr5_81020138_81825133(+)_transcript=ENSMUST00000119788.7	Adgrl3	5394	5194.99	0.13447	0	0	No Change Low Expression	spliced
Adgrv1_chr13_81095068_81633154(-)_transcript=ENSMUST00000146749.1	Adgrv1	1592	1392.99	3.71038	0	0	Down	spliced
Adh5_chr3_138443093_138455499(+)_transcript=ENSMUST00000005964.6	Adh5	1604	1404.99	133.699	0	0	No Change High Expression	spliced
Adh7_chr3_138217760_138233382(+)_transcript=ENSMUST00000090171.6	Adh7	3432	3232.99	0.219823	0	0	No Change Low Expression	spliced
Adhfe1_chr1_9547948_9580673(+)_transcript=ENSMUST00000144177.7	Adhfe1	3239	3039.99	0.256451	0	0	No Change Low Expression	spliced
Adi1_chr12_28675231_28682175(+)_transcript=ENSMUST00000020957.12	Adi1	1652	1452.99	25.7127	0	0	No Change High Expression	spliced
Adipor1_chr1_134415378_134433351(+)_transcript=ENSMUST00000027727.14	Adipor1	3123	2923.99	49.7948	0.182766	-0.091403	No Change High Expression	spliced
Adipor2_chr6_119353150_119417704(-)_transcript=ENSMUST00000032272.12	Adipor2	4184	3984.99	32.1041	0.0395131	-0.0212545	No Change High Expression	spliced
Adk_chr14_21052574_21448569(+)_transcript=ENSMUST00000045376.10	Adk	1782	1582.99	54.7232	1.91758	0.03487	Down	spliced
Adm_chr7_110627661_110629820(+)_transcript=ENSMUST00000033054.9	Adm	1390	1190.99	0.834633	0	0	No Change Low Expression	spliced
Adm2_chr15_89322720_89324731(+)_transcript=ENSMUST00000066991.6	Adm2	1298	1098.99	1.42304	0.124769	0.017329	No Change Medium Expression	spliced
Adnp_chr2_168180986_168207112(-)_transcript=ENSMUST00000057793.10	Adnp	4917	4717.99	14.8995	0.537726	-0.176023	No Change Medium Expression	spliced
Adnp2_chr18_80126311_80151482(-)_transcript=ENSMUST00000066743.10	Adnp2	5012	4812.99	28.8164	0	0	No Change High Expression	spliced
Ado_chr10_67544511_67549068(-)_transcript=ENSMUST00000075686.6	Ado	4558	4358.99	8.88422	0	0	No Change Medium Expression	spliced
Adora1_chr1_134199223_134235431(-)_transcript=ENSMUST00000086465.5	Adora1	4968	4768.99	0.148644	0	0	No Change Low Expression	spliced
Adora2a_chr10_75316877_75334784(+)_transcript=ENSMUST00000105420.2	Adora2a	2596	2396.99	0.229879	0	0	No Change Low Expression	spliced
Adora2b_chr11_62248984_62266453(+)_transcript=ENSMUST00000018644.2	Adora2b	1845	1645.99	0.604809	0	0	No Change Low Expression	spliced
Adpgk_chr9_59291558_59324052(+)_transcript=ENSMUST00000217570.1	Adpgk	2484	2284.99	26.2437	0	0	No Change High Expression	spliced
Adprh_chr16_38444030_38452703(-)_transcript=ENSMUST00000002923.9	Adprh	2966	2766.99	24.5553	0	0	No Change High Expression	spliced
Adprhl1_chr8_13221663_13254162(-)_transcript=ENSMUST00000033825.10	Adprhl1	1372	1172.99	0.249535	0	0	No Change Low Expression	spliced
Adprhl2_chr4_126316047_126321703(-)_transcript=ENSMUST00000102617.4	Adprhl2	1672	1472.99	20.7422	0.0289013	-0.0333193	No Change High Expression	spliced
Adprm_chr11_67037905_67052594(-)_transcript=ENSMUST00000116363.1	Adprm	1283	1083.99	15.12	0	0	No Change Medium Expression	spliced
Adra2b_chr2_127363208_127367221(+)_transcript=ENSMUST00000071902.4	Adra2b	3936	3736.99	0.221667	0	0	No Change Low Expression	spliced
Adrb2_chr18_62177816_62179959(-)_transcript=ENSMUST00000053640.4	Adrb2	2144	1944.99	0.915681	0	0	No Change Low Expression	spliced
Adrb3_chr8_27225776_27250616(-)_transcript=ENSMUST00000081438.9	Adrb3	2795	2595.99	5.77903	0	0	No Change Medium Expression	spliced
Adrm1_chr2_180171485_180176286(+)_transcript=ENSMUST00000061437.4	Adrm1	1535	1335.99	87.456	0	0	No Change High Expression	spliced
Adsl_chr15_80948490_80970946(+)_transcript=ENSMUST00000164806.5	Adsl	1595	1395.99	25.3825	0	0	No Change High Expression	spliced
Adss_chr1_177762962_177796511(-)_transcript=ENSMUST00000016105.8	Adss	2771	2571.99	92.9085	0	0	No Change High Expression	spliced
Adssl1_chr12_112620045_112641360(+)_transcript=ENSMUST00000021726.7	Adssl1	1777	1577.99	1.48463	0	0	No Change Medium Expression	spliced
Aebp1_chr11_5861947_5872088(+)_transcript=ENSMUST00000102923.9	Aebp1	3831	3631.99	2.49482	1.33395	0.791765	No Change Medium Expression	spliced
Aebp2_chr6_140622663_140678472(+)_transcript=ENSMUST00000161335.7	Aebp2	2524	2324.99	12.5463	0	0	No Change Medium Expression	spliced
Aen_chr7_78895854_78911209(+)_transcript=ENSMUST00000107421.7	Aen	2007	1807.99	44.1025	0	0	Down	spliced
Afap1_chr5_35893319_36003923(+)_transcript=ENSMUST00000064571.10	Afap1	6618	6418.99	10.906	0.299907	0.023634	No Change Medium Expression	spliced
Afap1l1_chr18_61730261_61786702(-)_transcript=ENSMUST00000120472.1	Afap1l1	3444	3244.99	2.09405	0	0	No Change Medium Expression	spliced
Afap1l2_chr19_56912361_57008228(-)_transcript=ENSMUST00000118800.7	Afap1l2	3531	3331.99	0.729611	0	0	No Change Low Expression	spliced
Afdn_chr17_13760539_13906150(+)_transcript=ENSMUST00000170827.8	Afdn	7338	7138.99	52.4641	0	0	No Change High Expression	spliced
Aff1_chr5_103692374_103855322(+)_transcript=ENSMUST00000054979.9	Aff1	8323	8123.99	15.7613	1.95047	0.80492	No Change Medium Expression	spliced
Aff2_chrX_69360294_69868037(+)_transcript=ENSMUST00000033532.6	Aff2	4523	4323.99	0.851521	0.181049	0.150352	No Change Low Expression	spliced
Aff3_chr1_38177326_38664955(-)_transcript=ENSMUST00000039827.13	Aff3	6010	5810.99	3.84301	3.94684	2.43434	No Change Medium Expression	spliced
Aff4_chr11_53350833_53421830(+)_transcript=ENSMUST00000060945.11	Aff4	10099	9899.99	75.8305	0.459629	-0.455995	No Change High Expression	spliced
Afg1l_chr10_42312585_42478565(-)_transcript=ENSMUST00000041024.14	Afg1l	2513	2313.99	7.35768	0.05972	-0.093765	No Change Medium Expression	spliced
Afg3l1_chr8_123477903_123503916(+)_transcript=ENSMUST00000001520.12	Afg3l1	4227	4027.99	36.7573	0.0287928	-0.0172528	No Change High Expression	spliced
Afg3l2_chr18_67404764_67449172(-)_transcript=ENSMUST00000025408.9	Afg3l2	3094	2894.99	40.053	0	0	No Change High Expression	spliced
Afm_chr5_90518932_90553543(+)_transcript=ENSMUST00000113179.8	Afm	2038	1838.99	0.264689	0	0	No Change Low Expression	spliced
Afmid_chr11_117825924_117839908(+)_transcript=ENSMUST00000073388.12	Afmid	2327	2127.99	0.468075	0	-0.179131	No Change Low Expression	spliced
Aftph_chr11_20685084_20741589(-)_transcript=ENSMUST00000035350.11	Aftph	3998	3798.99	10.8917	0	0	Up	spliced
Aga_chr8_53511727_53523421(+)_transcript=ENSMUST00000033920.5	Aga	1181	981.994	6.89558	0	0	No Change Medium Expression	spliced
Agap1_chr1_89454806_89897617(+)_transcript=ENSMUST00000190096.6	Agap1	4078	3878.99	14.5307	0.819327	-0.008313	No Change Medium Expression	spliced
Agap2_chr10_127075284_127093169(+)_transcript=ENSMUST00000217941.1	Agap2	5573	5373.99	0.60506	0	0	No Change Low Expression	spliced
Agap3_chr5_24452177_24502047(+)_transcript=ENSMUST00000024123.8	Agap3	3207	3007.99	15.3677	0	0	No Change Medium Expression	spliced
Agbl2_chr2_90782727_90834437(+)_transcript=ENSMUST00000111481.1	Agbl2	3448	3248.99	0.191389	0	0	No Change Low Expression	spliced
Agbl5_chr5_30888694_30906965(+)_transcript=ENSMUST00000201168.3	Agbl5	3199	2999.99	3.82366	0.0413845	0.0413845	No Change Medium Expression	spliced
Ager_chr17_34597862_34600936(+)_transcript=ENSMUST00000015596.9	Ager	1370	1170.99	0.924086	0	0	No Change Low Expression	spliced
Agfg1_chr1_82839483_82901182(+)_transcript=ENSMUST00000186302.6	Agfg1	2352	2152.99	18.0405	0	0	No Change High Expression	spliced
Agfg2_chr5_137650463_137684726(-)_transcript=ENSMUST00000031736.15	Agfg2	2893	2693.99	7.0166	1.79294e-09	1.79294e-09	No Change Medium Expression	spliced
Aggf1_chr13_95350683_95375352(-)_transcript=ENSMUST00000022189.8	Aggf1	3249	3049.99	37.4341	0	0	No Change High Expression	spliced
Agk_chr6_40325172_40396762(+)_transcript=ENSMUST00000031977.11	Agk	2531	2331.99	9.8232	0.211147	-0.049778	No Change Medium Expression	spliced
Agl_chr3_116739999_116808166(-)_transcript=ENSMUST00000162792.7	Agl	6978	6778.99	6.07165	0	0	No Change Medium Expression	spliced
Agmat_chr4_141746672_141759263(+)_transcript=ENSMUST00000038161.4	Agmat	1407	1207.99	0.885812	0	0	No Change Low Expression	spliced
Ago1_chr4_126435012_126468583(-)_transcript=ENSMUST00000239428.1	Ago1	7065	6865.99	23.4755	0.0191952	0.0191952	No Change High Expression	spliced
Ago2_chr15_73095844_73184935(-)_transcript=ENSMUST00000044113.11	Ago2	13800	13601	40.9779	0.897755	-0.628075	No Change High Expression	spliced
Ago3_chr4_126331704_126429556(-)_transcript=ENSMUST00000069097.12	Ago3	15595	15396	5.80864	0.165964	0.045953	No Change Medium Expression	spliced
Ago4_chr4_126489541_126533472(-)_transcript=ENSMUST00000084289.4	Ago4	6537	6337.99	0.496572	0.386833	0.330642	No Change Low Expression	spliced
Agpat1_chr17_34604262_34613449(+)_transcript=ENSMUST00000037489.14	Agpat1	2190	1990.99	30.8586	0	0	No Change High Expression	spliced
Agpat2_chr2_26593057_26604417(-)_transcript=ENSMUST00000028286.11	Agpat2	1489	1289.99	17.279	0	0	No Change High Expression	spliced
Agpat3_chr10_78269178_78352489(-)_transcript=ENSMUST00000105387.7	Agpat3	1316	1116.99	6.66883	0.164246	-0.011616	No Change Medium Expression	spliced
Agpat4_chr17_12118704_12219645(+)_transcript=ENSMUST00000024594.8	Agpat4	1915	1715.99	26.5967	0.633188	-0.628632	No Change High Expression	spliced
Agpat5_chr8_18846277_18891361(+)_transcript=ENSMUST00000033847.4	Agpat5	2841	2641.99	16.7426	0.0287928	0.0134443	No Change High Expression	spliced
Agps_chr2_75832177_75931350(+)_transcript=ENSMUST00000175646.1	Agps	1839	1639.99	32.0661	0.239759	-0.08256	No Change High Expression	spliced
Agrn_chr4_156165290_156197488(-)_transcript=ENSMUST00000105574.8	Agrn	7193	6993.99	46.8525	0	0	No Change High Expression	spliced
Agtpbp1_chr13_59445742_59585227(-)_transcript=ENSMUST00000171606.8	Agtpbp1	3037	2837.99	3.95107	0	0	No Change Medium Expression	spliced
Agtr1a_chr13_30336441_30382867(+)_transcript=ENSMUST00000066412.7	Agtr1a	2199	1999.99	0.279102	0	0	No Change Low Expression	spliced
Agtrap_chr4_148077061_148088031(-)_transcript=ENSMUST00000030865.8	Agtrap	3996	3796.99	23.8776	0	0	No Change High Expression	spliced
Ahctf1_chr1_179744894_179803680(-)_transcript=ENSMUST00000027768.13	Ahctf1	8506	8306.99	73.2791	115.01	59.7166	No Change High Expression	spliced
Ahcy_chr2_155059310_155074497(-)_transcript=ENSMUST00000054607.15	Ahcy	2543	2343.99	71.3765	0	0	No Change High Expression	spliced
Ahcyl1_chr3_107663118_107696560(-)_transcript=ENSMUST00000029490.14	Ahcyl1	3863	3663.99	38.1015	0	0	No Change High Expression	spliced
Ahcyl2_chr6_29768011_29912310(+)_transcript=ENSMUST00000102995.8	Ahcyl2	5155	4955.99	4.86032	0.0758382	0.0758382	No Change Medium Expression	spliced
Ahdc1_chr4_133011260_133078110(+)_transcript=ENSMUST00000105914.1	Ahdc1	5898	5698.99	26.3098	0	0	No Change High Expression	spliced
Ahi1_chr10_20952547_21080429(+)_transcript=ENSMUST00000105525.11	Ahi1	4851	4651.99	5.18257	0	0	No Change Medium Expression	spliced
Ahnak_chr19_8989284_9076914(+)_transcript=ENSMUST00000092956.3	Ahnak	18100	17901	67.4368	0	-0.0460456	Down	spliced
Ahnak2_chr12_112772194_112802657(-)_transcript=ENSMUST00000101010.2	Ahnak2	2821	2621.99	3.85578	0	0	No Change Medium Expression	spliced
Ahr_chr12_35497974_35535038(-)_transcript=ENSMUST00000116436.8	Ahr	5548	5348.99	3.87644	4.44427	3.30848	No Change Medium Expression	spliced
Ahrr_chr13_74211118_74292331(-)_transcript=ENSMUST00000022059.13	Ahrr	4754	4554.99	0.227151	0	0	No Change Low Expression	spliced
Ahsa1_chr12_87266479_87273998(+)_transcript=ENSMUST00000021425.7	Ahsa1	1377	1177.99	148.496	0	0	No Change High Expression	spliced
Ahsa2_chr11_23487882_23498030(-)_transcript=ENSMUST00000020529.12	Ahsa2	3023	2823.99	10.5609	2.3122	1.62152	No Change Medium Expression	spliced
Ahsg_chr16_22891277_22899449(+)_transcript=ENSMUST00000231328.1	Ahsg	1291	1091.99	0.425943	0	0	No Change Low Expression	spliced
AI413582_chr17_27563573_27565756(-)_transcript=ENSMUST00000232276.1	AI413582	860	660.994	1.85143	0	0	No Change Medium Expression	spliced
AI463170_chr12_76546972_76547943(-)_transcript=ENSMUST00000219353.1	AI463170	430	230.994	0.410456	0	0	No Change Low Expression	spliced
AI467606_chr7_127091359_127093986(+)_transcript=ENSMUST00000056288.6	AI467606	1932	1732.99	2.24659	0	0	No Change Medium Expression	spliced
AI480526_chr5_123133723_123141666(-)_transcript=ENSMUST00000159072.1	AI480526	957	757.994	4.17662	0	0	No Change Medium Expression	spliced
AI504432_chr3_107039504_107054347(+)_transcript=ENSMUST00000070085.5	AI504432	5569	5369.99	0.320551	0	0	No Change Low Expression	spliced
AI506816_chr5_23698296_23712667(-)_transcript=ENSMUST00000199941.4	AI506816	2804	2604.99	30.3027	0.161086	0.156143	No Change High Expression	spliced
AI597479_chr1_43098710_43115947(+)_transcript=ENSMUST00000010434.7	AI597479	3458	3258.99	9.98841	0	0	No Change Medium Expression	spliced
AI661453_chr17_47436615_47470638(+)_transcript=ENSMUST00000150819.2	AI661453	4866	4666.99	5.06758	0	0	No Change Medium Expression	spliced
AI662270_chr11_83223576_83226604(+)_transcript=ENSMUST00000142709.1	AI662270	304	107.281	1.45731	0	0	No Change Medium Expression	spliced
AI837181_chr19_5425144_5427313(+)_transcript=ENSMUST00000159759.2	AI837181	1528	1328.99	12.4312	0	0	No Change Medium Expression	spliced
AI847159_chr2_129158666_129180667(-)_transcript=ENSMUST00000138431.1	AI847159	952	752.994	0.589602	0	0	No Change Low Expression	spliced
AI987944_chr7_41372923_41393379(-)_transcript=ENSMUST00000071804.9	AI987944	2671	2471.99	2.54056	3.63157	2.22343	No Change Medium Expression	spliced
Aida_chr1_183296590_183325476(+)_transcript=ENSMUST00000193625.1	Aida	1810	1610.99	14.5289	0	0	No Change Medium Expression	spliced
Aif1l_chr2_31950139_31973442(+)_transcript=ENSMUST00000001920.12	Aif1l	3117	2917.99	10.7975	0	0	No Change Medium Expression	spliced
Aifm1_chrX_48474944_48513563(-)_transcript=ENSMUST00000037349.7	Aifm1	2237	2037.99	24.8331	2.93079e-05	-0.000138648	No Change High Expression	spliced
Aifm2_chr10_61715263_61739260(+)_transcript=ENSMUST00000099706.8	Aifm2	3086	2886.99	2.74475	0	0	No Change Medium Expression	spliced
Aifm3_chr16_17489611_17507485(+)_transcript=ENSMUST00000115685.9	Aifm3	2357	2157.99	1.86568	0	0	No Change Medium Expression	spliced
Aig1_chr10_13647054_13868980(-)_transcript=ENSMUST00000162610.7	Aig1	1554	1354.99	3.46194	0.0138791	-0.0083164	No Change Medium Expression	spliced
Aim2_chr1_173350879_173466040(+)_transcript=ENSMUST00000166137.2	Aim2	2079	1879.99	6.101	0	0	No Change Medium Expression	spliced
Aimp1_chr3_132660481_132684370(-)_transcript=ENSMUST00000029663.10	Aimp1	1126	926.994	58.5461	0	0	No Change High Expression	spliced
Aimp2_chr5_143902704_143909847(-)_transcript=ENSMUST00000031613.10	Aimp2	1185	985.994	29.1716	0	0	No Change High Expression	spliced
Aip_chr19_4114446_4125858(-)_transcript=ENSMUST00000025767.13	Aip	1261	1061.99	11.0241	0.293785	-0.23538	No Change Medium Expression	spliced
Aire_chr10_78030022_78043610(-)_transcript=ENSMUST00000130972.7	Aire	1923	1723.99	3.30078	0	0	Up	spliced
Ajm1_chr2_25575416_25581757(-)_transcript=ENSMUST00000114217.2	Ajm1	4881	4681.99	0.757144	4.62611e-09	4.62611e-09	No Change Low Expression	spliced
Ajuba_chr14_54567472_54577558(-)_transcript=ENSMUST00000054487.9	Ajuba	3397	3197.99	97.5369	0.0146073	0.0146073	Down	spliced
Ak1_chr2_32621758_32635058(+)_transcript=ENSMUST00000113277.7	Ak1	2063	1863.99	13.4067	0	0	No Change Medium Expression	spliced
AK157302_chr13_21495223_21497146(+)_transcript=ENSMUST00000104942.1	AK157302	1924	1724.99	3.07107	0	0	No Change Medium Expression	spliced
Ak2_chr4_128991958_129011529(+)_transcript=ENSMUST00000102604.10	Ak2	1781	1581.99	102.535	0	0	No Change High Expression	spliced
Ak3_chr19_29020833_29047961(-)_transcript=ENSMUST00000025696.4	Ak3	2809	2609.99	4.69348	0.159419	0.017573	No Change Medium Expression	spliced
Ak3l2-ps_chr2_72633936_72634607(+)_transcript=ENSMUST00000120282.1	Ak3l2-ps	672	472.994	3.98326	0	0	Up	spliced
Ak4_chr4_101419277_101466995(+)_transcript=ENSMUST00000106945.7	Ak4	4175	3975.99	18.4009	0	0	No Change High Expression	spliced
Ak5_chr3_152462815_152668360(-)_transcript=ENSMUST00000045262.10	Ak5	3323	3123.99	0.883091	0.19619	0.181316	No Change Low Expression	spliced
Ak6_chr13_100650979_100666359(+)_transcript=ENSMUST00000084721.7	Ak6	1222	1022.99	48.5164	0	0	No Change High Expression	spliced
Ak7_chr12_105705976_105782447(+)_transcript=ENSMUST00000040876.6	Ak7	3099	2899.99	1.31398	0	0	No Change Medium Expression	spliced
Ak8_chr2_28700164_28813165(+)_transcript=ENSMUST00000074156.6	Ak8	1567	1367.99	0.146451	0	0	No Change Low Expression	spliced
Akap1_chr11_88830792_88864586(-)_transcript=ENSMUST00000107903.7	Akap1	3721	3521.99	53.3853	0	0	Up	spliced
Akap10_chr11_61871307_61930252(-)_transcript=ENSMUST00000102650.9	Akap10	3874	3674.99	14.7865	0.0386355	-0.0841525	No Change Medium Expression	spliced
Akap11_chr14_78492246_78536808(-)_transcript=ENSMUST00000123853.8	Akap11	9364	9164.99	18.2097	0	0	No Change High Expression	spliced
Akap12_chr10_4266380_4359470(+)_transcript=ENSMUST00000045730.6	Akap12	6195	5995.99	269.389	0.05382	0.05382	No Change High Expression	spliced
Akap13_chr7_75455534_75754609(+)_transcript=ENSMUST00000166315.6	Akap13	12543	12344	6.52349	0.675928	0.161379	No Change Medium Expression	spliced
Akap17b_chrX_36608314_36645395(-)_transcript=ENSMUST00000051906.12	Akap17b	6003	5803.99	3.85831	2.1143	0.97179	No Change Medium Expression	spliced
Akap5_chr12_76324891_76334153(+)_transcript=ENSMUST00000172992.1	Akap5	2711	2511.99	3.1541	21.1668	14.6746	No Change Medium Expression	spliced
Akap7_chr10_25169090_25307870(-)_transcript=ENSMUST00000041984.13	Akap7	2092	1892.99	5.81083	1.80111	0.43608	No Change Medium Expression	spliced
Akap8_chr17_32303672_32321238(-)_transcript=ENSMUST00000002699.6	Akap8	3731	3531.99	60.1296	0.0191952	0.0191952	No Change High Expression	spliced
Akap8l_chr17_32321424_32350607(-)_transcript=ENSMUST00000050214.8	Akap8l	2102	1902.99	30.7272	0	0	No Change High Expression	spliced
Akap9_chr5_3928054_4081310(+)_transcript=ENSMUST00000044492.9	Akap9	13123	12924	16.7207	109.526	56.9177	No Change High Expression	spliced
Akip1_chr7_109703690_109712189(+)_transcript=ENSMUST00000033335.5	Akip1	1028	828.994	12.4632	0	0	No Change Medium Expression	spliced
Akirin1_chr4_123734559_123750345(-)_transcript=ENSMUST00000102636.3	Akirin1	3052	2852.99	19.3548	0	0	No Change High Expression	spliced
Akirin2_chr4_34550937_34566908(+)_transcript=ENSMUST00000084299.5	Akirin2	1397	1197.99	54.877	0	0	No Change High Expression	spliced
Akna_chr4_63367125_63403354(-)_transcript=ENSMUST00000035724.4	Akna	5387	5187.99	3.4331	0	0	No Change Medium Expression	spliced
Akr1a1_chr4_116636510_116651680(-)_transcript=ENSMUST00000030455.14	Akr1a1	1420	1220.99	175.65	0	0	No Change High Expression	spliced
Akr1b10_chr6_34384218_34396950(+)_transcript=ENSMUST00000038383.13	Akr1b10	1371	1171.99	2.38069	0.0322302	0.0322302	No Change Medium Expression	spliced
Akr1b3_chr6_34302434_34317478(-)_transcript=ENSMUST00000102980.10	Akr1b3	1387	1187.99	57.8708	0	0	No Change High Expression	spliced
Akr1b8_chr6_34354119_34368463(+)_transcript=ENSMUST00000038406.6	Akr1b8	1358	1158.99	5.84508	0	0	No Change Medium Expression	spliced
Akr1e1_chr13_4590750_4609174(-)_transcript=ENSMUST00000091848.6	Akr1e1	3463	3263.99	1.44179	0	0	No Change Medium Expression	spliced
Akr7a5_chr4_139310744_139318426(+)_transcript=ENSMUST00000073787.6	Akr7a5	1288	1088.99	13.1804	0	0	No Change Medium Expression	spliced
Akt1_chr12_112653821_112674884(-)_transcript=ENSMUST00000001780.9	Akt1	2690	2490.99	25.7733	0	0	No Change High Expression	spliced
Akt1s1_chr7_44848991_44855421(+)_transcript=ENSMUST00000054343.14	Akt1s1	1592	1392.99	16.0202	0	0	No Change High Expression	spliced
Akt2_chr7_27591552_27640826(+)_transcript=ENSMUST00000051356.11	Akt2	2923	2723.99	19.4754	0	0	No Change High Expression	spliced
Akt2-ps_chr11_16514533_16515981(+)_transcript=ENSMUST00000120718.1	Akt2-ps	1449	1249.99	1.39315	0	0	No Change Medium Expression	spliced
Akt3_chr1_177020073_177258203(-)_transcript=ENSMUST00000019843.14	Akt3	1511	1311.99	8.70365	0	0	No Change Medium Expression	spliced
Aktip_chr8_91111784_91199976(-)_transcript=ENSMUST00000125257.2	Aktip	2079	1879.99	26.7293	0	0	No Change High Expression	spliced
Alad_chr4_62509169_62519918(-)_transcript=ENSMUST00000030090.3	Alad	1206	1006.99	12.7706	0.680604	-0.347746	No Change Medium Expression	spliced
Alas1_chr9_106233455_106248654(-)_transcript=ENSMUST00000074082.12	Alas1	2129	1929.99	9.26781	0	0	No Change Medium Expression	spliced
Alcam_chr16_52248996_52454074(-)_transcript=ENSMUST00000168071.1	Alcam	878	678.994	0.463664	0	0	No Change Low Expression	spliced
Aldh16a1_chr7_45140684_45154584(-)_transcript=ENSMUST00000209963.1	Aldh16a1	3537	3337.99	9.08155	0	0	No Change Medium Expression	spliced
Aldh18a1_chr19_40550257_40588463(-)_transcript=ENSMUST00000025979.12	Aldh18a1	3527	3327.99	24.1371	0	0	No Change High Expression	spliced
Aldh1a2_chr9_71215789_71296243(+)_transcript=ENSMUST00000034723.5	Aldh1a2	2264	2064.99	0.656874	0	0	No Change Low Expression	spliced
Aldh1a3_chr7_66390890_66427517(-)_transcript=ENSMUST00000174209.7	Aldh1a3	1496	1296.99	2.49878	0	0	No Change Medium Expression	spliced
Aldh1b1_chr4_45799022_45804604(+)_transcript=ENSMUST00000044384.4	Aldh1b1	2298	2098.99	3.33206	0	0	No Change Medium Expression	spliced
Aldh1l1_chr6_90486427_90600203(+)_transcript=ENSMUST00000032175.10	Aldh1l1	3052	2852.99	1.49091	0	-0.0153485	No Change Medium Expression	spliced
Aldh1l2_chr10_83487450_83534140(-)_transcript=ENSMUST00000020497.13	Aldh1l2	6027	5827.99	1.08743	0	0	No Change Medium Expression	spliced
Aldh2_chr5_121566027_121593824(-)_transcript=ENSMUST00000129753.7	Aldh2	1799	1599.99	26.1353	0.44149	-0.418027	No Change High Expression	spliced
Aldh3a1_chr11_61207537_61218421(+)_transcript=ENSMUST00000108716.7	Aldh3a1	1721	1521.99	0.637828	0	0	No Change Low Expression	spliced
Aldh3a2_chr11_61223417_61267464(-)_transcript=ENSMUST00000074127.13	Aldh3a2	3091	2891.99	13.3719	0	0	No Change Medium Expression	spliced
Aldh3b1_chr19_3913491_3929808(-)_transcript=ENSMUST00000051803.7	Aldh3b1	1924	1724.99	1.43475	0	0	No Change Medium Expression	spliced
Aldh3b2_chr19_3972328_3981646(+)_transcript=ENSMUST00000143380.2	Aldh3b2	2142	1942.99	0.255802	0	0	No Change Low Expression	spliced
Aldh4a1_chr4_139622866_139649690(+)_transcript=ENSMUST00000039818.9	Aldh4a1	3382	3182.99	12.5817	0	0	No Change Medium Expression	spliced
Aldh5a1_chr13_24907579_24937661(-)_transcript=ENSMUST00000037615.6	Aldh5a1	5647	5447.99	4.81828	0	0	No Change Medium Expression	spliced
Aldh6a1_chr12_84430717_84451004(-)_transcript=ENSMUST00000085192.6	Aldh6a1	3399	3199.99	8.43466	0	0	No Change Medium Expression	spliced
Aldh7a1_chr18_56509687_56572951(-)_transcript=ENSMUST00000066208.12	Aldh7a1	1914	1714.99	44.6764	0	0	No Change High Expression	spliced
Aldh9a1_chr1_167349991_167368532(+)_transcript=ENSMUST00000028004.10	Aldh9a1	2835	2635.99	63.7381	0.00959761	0.00959761	No Change High Expression	spliced
Aldoa_chr7_126795234_126800751(-)_transcript=ENSMUST00000032934.11	Aldoa	1511	1311.99	577.12	0	0	Up	spliced
Aldoa-ps4_chr9_79346774_79347526(+)_transcript=ENSMUST00000216332.1	Aldoa-ps4	753	553.994	0.224653	0	0	No Change Low Expression	spliced
Aldoc_chr11_78322968_78327781(+)_transcript=ENSMUST00000102478.3	Aldoc	1700	1500.99	8.85592	0	0	Up	spliced
Alg1_chr16_5233621_5244912(+)_transcript=ENSMUST00000100196.8	Alg1	1755	1555.99	5.50137	0	0	No Change Medium Expression	spliced
Alg10b_chr15_90224311_90233471(+)_transcript=ENSMUST00000100309.2	Alg10b	6644	6444.99	14.3085	0	0	No Change Medium Expression	spliced
Alg11_chr8_22060721_22071627(+)_transcript=ENSMUST00000072572.12	Alg11	4960	4760.99	10.1311	0	0	No Change Medium Expression	spliced
Alg12_chr15_88805244_88819318(-)_transcript=ENSMUST00000162183.7	Alg12	2130	1930.99	1.97442	0	0	No Change Medium Expression	spliced
Alg13_chrX_144317804_144374450(+)_transcript=ENSMUST00000238864.1	Alg13	4191	3991.99	105.071	0.00959761	0.00959761	No Change High Expression	spliced
Alg14_chr3_121291773_121363094(+)_transcript=ENSMUST00000039442.11	Alg14	2037	1837.99	3.75694	0.134367	0.028313	No Change Medium Expression	spliced
Alg2_chr4_47465067_47474333(-)_transcript=ENSMUST00000044148.2	Alg2	3021	2821.99	8.69442	0	0	No Change Medium Expression	spliced
Alg3_chr16_20605374_20611735(-)_transcript=ENSMUST00000045918.14	Alg3	1451	1251.99	13.2669	0	0	No Change Medium Expression	spliced
Alg5_chr3_54735539_54751318(+)_transcript=ENSMUST00000044567.3	Alg5	1471	1271.99	11.944	0	0	No Change Medium Expression	spliced
Alg6_chr4_99715664_99763460(+)_transcript=ENSMUST00000097961.8	Alg6	3079	2879.99	10.2276	0	0	No Change Medium Expression	spliced
Alg8_chr7_97371606_97392185(+)_transcript=ENSMUST00000098300.5	Alg8	2039	1839.99	11.0611	0.0619846	-0.027339	No Change Medium Expression	spliced
Alg9_chr9_50775019_50843542(+)_transcript=ENSMUST00000034561.10	Alg9	2873	2673.99	8.73655	0	0	No Change Medium Expression	spliced
Alk_chr17_71868972_72604627(-)_transcript=ENSMUST00000086639.5	Alk	5454	5254.99	0.14765	0.0226175	-0.0080795	No Change Low Expression	spliced
Alkbh1_chr12_87425840_87444017(-)_transcript=ENSMUST00000162961.7	Alkbh1	3857	3657.99	11.494	0.537859	-0.106779	No Change Medium Expression	spliced
Alkbh2_chr5_114123926_114128218(-)_transcript=ENSMUST00000112279.1	Alkbh2	899	699.994	24.3037	0	0	No Change High Expression	spliced
Alkbh3_chr2_93980550_94010807(-)_transcript=ENSMUST00000040005.12	Alkbh3	1228	1028.99	8.99688	0	0	No Change Medium Expression	spliced
Alkbh4_chr5_136136146_136141615(+)_transcript=ENSMUST00000041100.3	Alkbh4	1773	1573.99	5.32868	0	0	No Change Medium Expression	spliced
Alkbh5_chr11_60536381_60558512(+)_transcript=ENSMUST00000044250.3	Alkbh5	5730	5530.99	36.7132	0	0	Up	spliced
Alkbh6_chr7_30308717_30314304(+)_transcript=ENSMUST00000060834.11	Alkbh6	982	782.994	10.8587	0.0293704	0.0293704	No Change Medium Expression	spliced
Alkbh7_chr17_56997339_56999322(+)_transcript=ENSMUST00000002737.6	Alkbh7	917	717.994	3.5386	0	0	No Change Medium Expression	spliced
Alkbh8_chr9_3335140_3391154(+)_transcript=ENSMUST00000053407.12	Alkbh8	3603	3403.99	7.90822	6.55499	3.07048	No Change Medium Expression	spliced
Alms1_chr6_85587531_85702753(+)_transcript=ENSMUST00000213058.1	Alms1	11163	10964	15.5772	0	0	No Change Medium Expression	spliced
Alms1-ps1_chr6_85721925_85756526(+)_transcript=ENSMUST00000159498.1	Alms1-ps1	2166	1966.99	1.34237	0	0	No Change Medium Expression	spliced
Alms1-ps2_chr6_85774393_85804057(+)_transcript=ENSMUST00000161983.7	Alms1-ps2	2290	2090.99	3.36241	0.0108383	0.0108383	No Change Medium Expression	spliced
Alox12_chr11_70241457_70255353(-)_transcript=ENSMUST00000108574.2	Alox12	2314	2114.99	0.81486	0	0	No Change Low Expression	spliced
Alox12b_chr11_69156989_69169792(+)_transcript=ENSMUST00000036424.2	Alox12b	2431	2231.99	0.400373	0	0	No Change Low Expression	spliced
Alox15_chr11_70344152_70352031(-)_transcript=ENSMUST00000019068.6	Alox15	2409	2209.99	0.218803	0	0	No Change Low Expression	spliced
Alox5_chr6_116410077_116461178(-)_transcript=ENSMUST00000026795.12	Alox5	2821	2621.99	0.905103	0	0	No Change Low Expression	spliced
Alox5ap_chr5_149264767_149288153(+)_transcript=ENSMUST00000200928.1	Alox5ap	356	157.142	1.41143	0	0	No Change Medium Expression	spliced
Aloxe3_chr11_69125896_69149115(+)_transcript=ENSMUST00000021268.8	Aloxe3	3019	2819.99	0.356119	0	0	No Change Low Expression	spliced
Alpk1_chr3_127670310_127780527(-)_transcript=ENSMUST00000029662.11	Alpk1	4795	4595.99	0.32152	0	0	No Change Low Expression	spliced
Alpk3_chr7_81057600_81105612(+)_transcript=ENSMUST00000107348.1	Alpk3	6369	6169.99	2.91048	6.29145	2.73489	No Change Medium Expression	spliced
Alpl_chr4_137741733_137796384(-)_transcript=ENSMUST00000030551.10	Alpl	2522	2322.99	95.8269	0.00959761	0.00959761	No Change High Expression	spliced
Als2_chr1_59162926_59237231(-)_transcript=ENSMUST00000027178.12	Als2	6342	6142.99	15.0123	0	0	No Change Medium Expression	spliced
Als2cl_chr9_110879870_110900530(+)_transcript=ENSMUST00000130386.7	Als2cl	5056	4856.99	4.36297	0	0	No Change Medium Expression	spliced
Alyref_chr11_120592121_120598365(-)_transcript=ENSMUST00000026125.2	Alyref	3527	3327.99	53.7651	0	0	No Change High Expression	spliced
Alyref2_chr1_171503478_171504750(+)_transcript=ENSMUST00000081527.1	Alyref2	1273	1073.99	0.966624	0	0	No Change Low Expression	spliced
Amacr_chr15_10981756_10996626(+)_transcript=ENSMUST00000070877.6	Amacr	2577	2377.99	4.82905	0	0	No Change Medium Expression	spliced
Ambra1_chr2_91730134_91918849(+)_transcript=ENSMUST00000045705.13	Ambra1	5203	5003.99	10.5375	0	0	No Change Medium Expression	spliced
Amd-ps3_chr18_64448685_64449689(-)_transcript=ENSMUST00000072796.5	Amd-ps3	1005	805.994	18.3252	0	0	No Change High Expression	spliced
Amd-ps7_chr17_94803193_94803818(+)_transcript=ENSMUST00000234672.1	Amd-ps7	626	426.994	0.658693	0	0	No Change Low Expression	spliced
Amd1_chr10_40287458_40302188(-)_transcript=ENSMUST00000099945.5	Amd1	3204	3004.99	28.0293	0	0	No Change High Expression	spliced
Amd2_chr10_35708675_35711892(-)_transcript=ENSMUST00000080898.3	Amd2	3218	3018.99	12.6327	0	0	No Change Medium Expression	spliced
Amdhd2_chr17_24155833_24163766(-)_transcript=ENSMUST00000040735.11	Amdhd2	1496	1296.99	12.8103	0	-0.0153485	No Change Medium Expression	spliced
Amer1_chrX_95420318_95444872(-)_transcript=ENSMUST00000084535.5	Amer1	8496	8296.99	6.05922	16.1212	8.35485	No Change Medium Expression	spliced
Amer2_chr14_60373259_60388197(+)_transcript=ENSMUST00000239079.1	Amer2	2718	2518.99	0.384958	0	0	No Change Low Expression	spliced
Amfr_chr8_93971588_94012842(-)_transcript=ENSMUST00000053766.13	Amfr	3880	3680.99	23.1318	0	0	No Change High Expression	spliced
Amhr2_chr15_102445367_102454633(+)_transcript=ENSMUST00000023809.10	Amhr2	1938	1738.99	1.11763	0	0	No Change Medium Expression	spliced
Amigo1_chr3_108186335_108192286(+)_transcript=ENSMUST00000050909.6	Amigo1	5030	4830.99	0.96797	0	0	No Change Low Expression	spliced
Amigo2_chr15_97244125_97247287(-)_transcript=ENSMUST00000229890.1	Amigo2	2998	2798.99	2.00093	0	0	No Change Medium Expression	spliced
Amigo3_chr9_108053159_108055701(+)_transcript=ENSMUST00000085060.2	Amigo3	2543	2343.99	0.222398	0.295275	0.244032	No Change Low Expression	spliced
Ammecr1_chrX_142851146_142966728(-)_transcript=ENSMUST00000041317.2	Ammecr1	5437	5237.99	10.2289	0.276167	0.076636	Down	spliced
Ammecr1l_chr18_31759826_31782743(+)_transcript=ENSMUST00000115808.3	Ammecr1l	3385	3185.99	7.02031	0	0	No Change Medium Expression	spliced
Amn_chr12_111271095_111276426(+)_transcript=ENSMUST00000021707.7	Amn	1701	1501.99	0.220605	0	0	No Change Low Expression	spliced
Amn1_chr6_149157147_149188712(-)_transcript=ENSMUST00000095319.9	Amn1	1369	1169.99	3.77384	0	-2.69592e-08	No Change Medium Expression	spliced
Amot_chrX_145446425_145505181(-)_transcript=ENSMUST00000112836.8	Amot	6957	6757.99	4.21647	2.25412	1.23433	Down	spliced
Amotl1_chr9_14541966_14645056(-)_transcript=ENSMUST00000013220.7	Amotl1	8957	8757.99	9.85028	0.0213335	0.0213335	No Change Medium Expression	spliced
Amotl2_chr9_102716672_102733418(+)_transcript=ENSMUST00000035121.13	Amotl2	4328	4128.99	17.5518	0	0	Down	spliced
Ampd2_chr3_108074062_108086651(-)_transcript=ENSMUST00000102638.7	Ampd2	3650	3450.99	11.8843	0	0	No Change Medium Expression	spliced
Ampd3_chr7_110768206_110812405(+)_transcript=ENSMUST00000170374.7	Ampd3	3489	3289.99	0.872495	0	0	No Change Low Expression	spliced
Amph_chr13_18948205_19150921(+)_transcript=ENSMUST00000003345.9	Amph	3367	3167.99	3.62081	0	0	No Change Medium Expression	spliced
Amt_chr9_108296853_108302302(+)_transcript=ENSMUST00000035230.6	Amt	2082	1882.99	31.818	0	0	No Change High Expression	spliced
Amz1_chr5_140724127_140761439(+)_transcript=ENSMUST00000060918.10	Amz1	2683	2483.99	0.540384	0	0	No Change Low Expression	spliced
Amz2_chr11_109425946_109452813(+)_transcript=ENSMUST00000103061.2	Amz2	1832	1632.99	14.1321	0.105574	-0.124654	No Change Medium Expression	spliced
Anapc1_chr2_128610104_128687391(-)_transcript=ENSMUST00000110333.1	Anapc1	4214	4014.99	28.3302	0	0	No Change High Expression	spliced
Anapc10_chr8_79711820_79779059(+)_transcript=ENSMUST00000048147.8	Anapc10	2801	2601.99	14.5374	0.263198	-0.028424	No Change Medium Expression	spliced
Anapc11_chr11_120598421_120608198(+)_transcript=ENSMUST00000093140.4	Anapc11	962	762.994	42.6886	0	0	No Change High Expression	spliced
Anapc13_chr9_102626296_102634425(+)_transcript=ENSMUST00000038673.13	Anapc13	411	211.996	77.0003	0	0	No Change High Expression	spliced
Anapc15_chr7_101863715_101901849(+)_transcript=ENSMUST00000106978.7	Anapc15	841	641.994	55.4956	0	0	No Change High Expression	spliced
Anapc16_chr10_59987409_60003135(-)_transcript=ENSMUST00000182898.7	Anapc16	1852	1652.99	7.52615	0	0	No Change Medium Expression	spliced
Anapc2_chr2_25272478_25285915(+)_transcript=ENSMUST00000028341.10	Anapc2	3004	2804.99	26.7293	0	0	No Change High Expression	spliced
Anapc4_chr5_52834012_52867797(+)_transcript=ENSMUST00000031072.13	Anapc4	3854	3654.99	20.9158	0	0	No Change High Expression	spliced
Anapc5_chr5_122787459_122821339(-)_transcript=ENSMUST00000200645.4	Anapc5	2404	2204.99	69.2812	0	0	No Change High Expression	spliced
Anapc7_chr5_122421693_122444912(+)_transcript=ENSMUST00000031422.9	Anapc7	2751	2551.99	19.4441	0	0	No Change High Expression	spliced
Ang_chr14_51091150_51102009(+)_transcript=ENSMUST00000171688.8	Ang	728	528.994	0.492575	0.630218	0.373015	No Change Low Expression	spliced
Angel1_chr12_86700502_86726460(-)_transcript=ENSMUST00000021682.8	Angel1	3850	3650.99	3.84619	0.0287928	0.0134443	No Change Medium Expression	spliced
Angel2_chr1_190925112_190946962(+)_transcript=ENSMUST00000066632.13	Angel2	3714	3514.99	8.91422	0	0	No Change Medium Expression	spliced
Angpt2_chr8_18690263_18741562(-)_transcript=ENSMUST00000033846.6	Angpt2	3560	3360.99	0.126467	0	0	No Change Low Expression	spliced
Angptl2_chr2_33216069_33247717(+)_transcript=ENSMUST00000004208.6	Angptl2	3339	3139.99	0.243411	0	0	No Change Low Expression	spliced
Angptl4_chr17_33773750_33781830(-)_transcript=ENSMUST00000002360.16	Angptl4	3308	3108.99	3.81158	0	0	No Change Medium Expression	spliced
Angptl6_chr9_20873808_20879727(-)_transcript=ENSMUST00000043726.7	Angptl6	1582	1382.99	1.1691	0	0	No Change Medium Expression	spliced
Ank_chr15_27466677_27594909(+)_transcript=ENSMUST00000022875.6	Ank	3498	3298.99	7.49771	0.0479881	-0.0901489	No Change Medium Expression	spliced
Ank1_chr8_22974844_23150497(+)_transcript=ENSMUST00000117270.8	Ank1	5652	5452.99	0.246254	0	0	No Change Low Expression	spliced
Ank2_chr3_126921612_127499350(-)_transcript=ENSMUST00000044443.14	Ank2	5775	5575.99	6.59685	2.16006	0.83075	No Change Medium Expression	spliced
Ank3_chr10_69398773_70027438(+)_transcript=ENSMUST00000181974.7	Ank3	3751	3551.99	8.56778	0	0	No Change Medium Expression	spliced
Ankfy1_chr11_72690006_72772146(+)_transcript=ENSMUST00000155998.1	Ankfy1	8030	7830.99	15.1213	0	0	No Change Medium Expression	spliced
Ankhd1_chr18_36559987_36658913(+)_transcript=ENSMUST00000155329.8	Ankhd1	8223	8023.99	31.2034	18.7945	10.6683	No Change High Expression	spliced
Ankib1_chr5_3690000_3802925(-)_transcript=ENSMUST00000043551.10	Ankib1	6426	6226.99	6.26055	0.466516	0.282334	No Change Medium Expression	spliced
Ankle1_chr8_71406010_71409904(+)_transcript=ENSMUST00000119976.7	Ankle1	2136	1936.99	7.34356	0	0	No Change Medium Expression	spliced
Ankle2_chr5_110231004_110256651(+)_transcript=ENSMUST00000197188.4	Ankle2	4077	3877.99	25.8011	0	-0.0294873	No Change High Expression	spliced
Ankmy1_chr1_92859803_92902906(-)_transcript=ENSMUST00000112998.1	Ankmy1	3243	3043.99	0.237166	0	0	No Change Low Expression	spliced
Ankmy2_chr12_36157114_36197291(+)_transcript=ENSMUST00000041640.4	Ankmy2	2456	2256.99	11.9577	0.0575857	0.0422372	No Change Medium Expression	spliced
Ankra2_chr13_98263074_98274754(+)_transcript=ENSMUST00000123924.7	Ankra2	2328	2128.99	5.11747	0	0	No Change Medium Expression	spliced
Ankrd1_chr19_36111961_36120099(-)_transcript=ENSMUST00000025718.9	Ankrd1	1818	1618.99	0.256892	0	0	No Change Low Expression	spliced
Ankrd10_chr8_11611583_11635757(-)_transcript=ENSMUST00000033905.12	Ankrd10	2285	2085.99	34.3349	0.00959761	0.00959761	No Change High Expression	spliced
Ankrd11_chr8_122883822_123042277(-)_transcript=ENSMUST00000098334.12	Ankrd11	8455	8255.99	124.231	0	0	No Change High Expression	spliced
Ankrd12_chr17_65965698_66077089(-)_transcript=ENSMUST00000038116.12	Ankrd12	10821	10622	4.79911	0.331861	0.204688	No Change Medium Expression	spliced
Ankrd13a_chr5_114774677_114806200(+)_transcript=ENSMUST00000102578.10	Ankrd13a	3717	3517.99	33.0081	0.00959761	0.00959761	No Change High Expression	spliced
Ankrd13b_chr11_77470485_77489678(-)_transcript=ENSMUST00000037593.13	Ankrd13b	3105	2905.99	3.29603	0	0	No Change Medium Expression	spliced
Ankrd13c_chr3_157947239_158008034(+)_transcript=ENSMUST00000164582.3	Ankrd13c	1735	1535.99	23.9331	1.64977	-0.85115	No Change High Expression	spliced
Ankrd13d_chr19_4270180_4283137(-)_transcript=ENSMUST00000056888.12	Ankrd13d	2139	1939.99	3.01095	0	0	No Change Medium Expression	spliced
Ankrd16_chr2_11777876_11790329(+)_transcript=ENSMUST00000056108.11	Ankrd16	1618	1418.99	8.57549	1.46338	0.80153	No Change Medium Expression	spliced
Ankrd17_chr5_90227166_90366577(-)_transcript=ENSMUST00000197021.1	Ankrd17	8067	7867.99	32.7829	0	0	No Change High Expression	spliced
Ankrd23_chr1_36530188_36536883(-)_transcript=ENSMUST00000193083.5	Ankrd23	2277	2077.99	1.23244	0	0	No Change Medium Expression	spliced
Ankrd24_chr10_81628540_81647610(+)_transcript=ENSMUST00000119336.7	Ankrd24	3561	3361.99	2.71961	0.270967	-0.009804	No Change Medium Expression	spliced
Ankrd26_chr6_118501308_118562226(-)_transcript=ENSMUST00000112830.2	Ankrd26	6930	6730.99	6.65704	0.303483	-0.064882	No Change Medium Expression	spliced
Ankrd27_chr7_35586244_35639226(+)_transcript=ENSMUST00000040844.15	Ankrd27	4284	4084.99	25.4375	0	0	No Change High Expression	spliced
Ankrd28_chr14_31698768_31830651(-)_transcript=ENSMUST00000227089.1	Ankrd28	3522	3322.99	18.4903	1.40474	-1.06445	No Change High Expression	spliced
Ankrd31_chr13_96748272_96910039(+)_transcript=ENSMUST00000208758.1	Ankrd31	5859	5659.99	0.495268	0	0	No Change Low Expression	spliced
Ankrd33b_chr15_31291478_31367726(-)_transcript=ENSMUST00000123325.8	Ankrd33b	7466	7266.99	0.562181	0	0	No Change Low Expression	spliced
Ankrd34a_chr3_96596636_96599775(+)_transcript=ENSMUST00000058943.7	Ankrd34a	2583	2383.99	0.972919	0	0	No Change Low Expression	spliced
Ankrd34b_chr13_92425896_92441658(+)_transcript=ENSMUST00000061594.12	Ankrd34b	4013	3813.99	0.328065	0	0	No Change Low Expression	spliced
Ankrd35_chr3_96670131_96691032(+)_transcript=ENSMUST00000048427.8	Ankrd35	4052	3852.99	6.27974	0	0	No Change Medium Expression	spliced
Ankrd37_chr8_45996902_46005707(-)_transcript=ENSMUST00000053558.9	Ankrd37	927	727.994	8.48145	0	0	Up	spliced
Ankrd39_chr1_36537507_36547445(-)_transcript=ENSMUST00000001172.11	Ankrd39	2109	1909.99	2.22895	0	0	No Change Medium Expression	spliced
Ankrd40_chr11_94328001_94341841(+)_transcript=ENSMUST00000107818.8	Ankrd40	3487	3287.99	20.1772	0	-0.0153485	No Change High Expression	spliced
Ankrd42_chr7_92581723_92637142(-)_transcript=ENSMUST00000118157.7	Ankrd42	2782	2582.99	0.729255	3.54424	2.48345	No Change Low Expression	spliced
Ankrd44_chr1_54645340_54926387(-)_transcript=ENSMUST00000179030.7	Ankrd44	6140	5940.99	0.553254	0	0	No Change Low Expression	spliced
Ankrd45_chr1_161142691_161170498(+)_transcript=ENSMUST00000111608.7	Ankrd45	3714	3514.99	4.59895	0	0	No Change Medium Expression	spliced
Ankrd46_chr15_36477668_36496820(-)_transcript=ENSMUST00000057486.8	Ankrd46	2509	2309.99	16.7265	0	0	No Change High Expression	spliced
Ankrd49_chr9_14779618_14784856(-)_transcript=ENSMUST00000216372.1	Ankrd49	2679	2479.99	4.82837	0	0	No Change Medium Expression	spliced
Ankrd50_chr3_38449259_38484844(-)_transcript=ENSMUST00000094300.3	Ankrd50	1944	1744.99	14.3414	0	0	No Change Medium Expression	spliced
Ankrd52_chr10_128377115_128408704(+)_transcript=ENSMUST00000014642.9	Ankrd52	6620	6420.99	15.8318	0.0071296	-0.0082189	No Change Medium Expression	spliced
Ankrd54_chr15_79053094_79062893(-)_transcript=ENSMUST00000040676.10	Ankrd54	1904	1704.99	8.33943	0	0	No Change Medium Expression	spliced
Ankrd6_chr4_32804035_32950841(-)_transcript=ENSMUST00000084749.7	Ankrd6	4573	4373.99	10.3475	0.0932058	-0.0260382	No Change Medium Expression	spliced
Ankrd9_chr12_110975353_110979040(-)_transcript=ENSMUST00000043459.12	Ankrd9	1706	1506.99	3.28749	0	0	No Change Medium Expression	spliced
Anks1_chr17_27909306_28062775(+)_transcript=ENSMUST00000233525.1	Anks1	5717	5517.99	4.88191	0	0	No Change Medium Expression	spliced
Anks1b_chr10_89873509_90973300(+)_transcript=ENSMUST00000099368.10	Anks1b	2799	2599.99	1.17203	0.0500741	0.0500741	No Change Medium Expression	spliced
Anks3_chr16_4941436_4964205(-)_transcript=ENSMUST00000023157.5	Anks3	2398	2198.99	6.53456	0	0	No Change Medium Expression	spliced
Anks6_chr4_47015669_47057427(-)_transcript=ENSMUST00000229609.1	Anks6	3438	3238.99	0.335287	0	0	No Change Low Expression	spliced
Ankzf1_chr1_75192151_75199387(+)_transcript=ENSMUST00000152233.8	Ankzf1	2739	2539.99	7.66189	0	0	Up	spliced
Anln_chr9_22332012_22389188(-)_transcript=ENSMUST00000040912.8	Anln	4605	4405.99	59.0732	0	-0.0127499	No Change High Expression	spliced
Ano1_chr7_144588549_144751974(-)_transcript=ENSMUST00000121758.7	Ano1	4552	4352.99	0.679704	0.0341021	0.0341021	No Change Low Expression	spliced
Ano10_chr9_122175874_122294423(-)_transcript=ENSMUST00000042546.3	Ano10	2653	2453.99	2.94642	0	0	No Change Medium Expression	spliced
Ano3_chr2_110655201_110950923(-)_transcript=ENSMUST00000099623.9	Ano3	6705	6505.99	1.44819	0.259136	0.059605	No Change Medium Expression	spliced
Ano4_chr10_88948994_89344762(-)_transcript=ENSMUST00000181976.7	Ano4	1410	1210.99	0.345917	0	0	No Change Low Expression	spliced
Ano6_chr15_95790843_95974751(+)_transcript=ENSMUST00000071874.7	Ano6	4927	4727.99	9.89291	0.129317	-0.136889	No Change Medium Expression	spliced
Ano7_chr1_93373930_93404303(+)_transcript=ENSMUST00000186641.6	Ano7	3984	3784.99	0.165474	0	0	No Change Low Expression	spliced
Ano8_chr8_71476019_71485963(-)_transcript=ENSMUST00000093450.5	Ano8	3653	3453.99	5.78406	0.0199865	-0.0381361	No Change Medium Expression	spliced
Ano9_chr7_141101212_141117806(-)_transcript=ENSMUST00000067836.8	Ano9	3019	2819.99	13.4544	0	0	No Change Medium Expression	spliced
Anp32-ps_chr11_33394879_33395266(-)_transcript=ENSMUST00000118265.1	Anp32-ps	388	189.01	9.28843	2.25316	0.96321	No Change Medium Expression	spliced
Anp32a_chr9_62341293_62378812(+)_transcript=ENSMUST00000135395.7	Anp32a	924	724.994	110.298	0.143454	0.132252	No Change High Expression	spliced
Anp32b_chr4_46450902_46472657(+)_transcript=ENSMUST00000102926.4	Anp32b	1716	1516.99	428.674	146.737	70.3273	No Change High Expression	spliced
Anp32b-ps1_chr4_143389659_143390416(+)_transcript=ENSMUST00000122215.1	Anp32b-ps1	758	558.994	0.566971	0	0	No Change Low Expression	spliced
Anp32e_chr3_95929246_95947390(+)_transcript=ENSMUST00000015893.12	Anp32e	1381	1181.99	70.5527	0.00891816	0.00891816	No Change High Expression	spliced
Anpep_chr7_79821803_79861059(-)_transcript=ENSMUST00000107392.7	Anpep	3797	3597.99	3.36873	0	0	No Change Medium Expression	spliced
Antxr1_chr6_87133853_87335821(-)_transcript=ENSMUST00000042025.11	Antxr1	5253	5053.99	0.439622	0.170551	0.170551	No Change Low Expression	spliced
Antxr2_chr5_97882783_98031043(-)_transcript=ENSMUST00000031281.13	Antxr2	5656	5456.99	0.306546	0	0	No Change Low Expression	spliced
Anxa1_chr19_20373428_20390944(-)_transcript=ENSMUST00000235280.1	Anxa1	1622	1422.99	3.90613	0.151814	0.105768	No Change Medium Expression	spliced
Anxa11_chr14_25842156_25886804(+)_transcript=ENSMUST00000022416.14	Anxa11	2394	2194.99	89.2772	0	0	No Change High Expression	spliced
Anxa2_chr9_69453620_69491795(+)_transcript=ENSMUST00000034756.14	Anxa2	1447	1247.99	19.0808	0.0479881	-0.0594519	No Change High Expression	spliced
Anxa3_chr5_96793339_96845966(+)_transcript=ENSMUST00000031447.11	Anxa3	1595	1395.99	10.8789	1.13322	0.689456	Down	spliced
Anxa4_chr6_86736840_86793584(-)_transcript=ENSMUST00000113675.7	Anxa4	2030	1830.99	6.78392	8.73023e-10	-2.30162e-08	No Change Medium Expression	spliced
Anxa5_chr3_36448923_36475894(-)_transcript=ENSMUST00000029266.13	Anxa5	1731	1531.99	13.0385	0	0	Down	spliced
Anxa6_chr11_54979108_55033445(-)_transcript=ENSMUST00000102727.2	Anxa6	2471	2271.99	22.2684	0	-0.0153416	Up	spliced
Anxa7_chr14_20455260_20480133(-)_transcript=ENSMUST00000224975.1	Anxa7	2727	2527.99	30.3688	0	0	No Change High Expression	spliced
Anxa8_chr14_34085981_34100571(+)_transcript=ENSMUST00000022519.14	Anxa8	1880	1680.99	4.41178	0	0	No Change Medium Expression	spliced
Anxa9_chr3_95296096_95307176(-)_transcript=ENSMUST00000015846.8	Anxa9	1851	1651.99	1.0492	0	0	No Change Medium Expression	spliced
Aoah_chr13_20794113_21036617(+)_transcript=ENSMUST00000021757.4	Aoah	2921	2721.99	3.44007	0.311517	0.20705	No Change Medium Expression	spliced
Aoc2_chr11_101325063_101329702(+)_transcript=ENSMUST00000041095.13	Aoc2	2543	2343.99	1.14884	0	0	No Change Medium Expression	spliced
Aoc3_chr11_101330605_101341938(+)_transcript=ENSMUST00000103105.9	Aoc3	4397	4197.99	0.312007	0	0	No Change Low Expression	spliced
Aopep_chr13_62964893_63326096(+)_transcript=ENSMUST00000021911.14	Aopep	2979	2779.99	5.59314	0.0681207	-0.0843933	No Change Medium Expression	spliced
Aox1_chr1_58029931_58106413(+)_transcript=ENSMUST00000001027.6	Aox1	4423	4223.99	0.48993	0	0	No Change Low Expression	spliced
Aox3_chr1_58113130_58200698(+)_transcript=ENSMUST00000162011.2	Aox3	1568	1368.99	0.460798	0	0	No Change Low Expression	spliced
Aox4_chr1_58210397_58268597(+)_transcript=ENSMUST00000040442.5	Aox4	4973	4773.99	0.22534	0	0	No Change Low Expression	spliced
Ap1ar_chr3_127807007_127837523(-)_transcript=ENSMUST00000051737.7	Ap1ar	2662	2462.99	26.8913	0	0	No Change High Expression	spliced
Ap1b1_chr11_4986824_5042791(+)_transcript=ENSMUST00000009234.15	Ap1b1	4085	3885.99	20.6583	0	0	No Change High Expression	spliced
Ap1g1_chr8_109778554_109864204(+)_transcript=ENSMUST00000093157.12	Ap1g1	6899	6699.99	31.2572	0	0	No Change High Expression	spliced
Ap1g2_chr14_55098575_55106593(-)_transcript=ENSMUST00000036041.14	Ap1g2	2673	2473.99	5.42854	0	0	No Change Medium Expression	spliced
Ap1m1_chr8_72240018_72257385(+)_transcript=ENSMUST00000003117.14	Ap1m1	2084	1884.99	33.8626	0	0	No Change High Expression	spliced
Ap1m2_chr9_21294275_21312337(-)_transcript=ENSMUST00000003397.8	Ap1m2	1706	1506.99	9.63953	0	0	No Change Medium Expression	spliced
Ap1s1_chr5_137034993_137046135(-)_transcript=ENSMUST00000111080.7	Ap1s1	1353	1153.99	19.1115	0	0	No Change High Expression	spliced
Ap1s2_chrX_163909017_163933666(+)_transcript=ENSMUST00000112294.8	Ap1s2	3199	2999.99	5.71216	0	0	No Change Medium Expression	spliced
Ap1s3_chr1_79606876_79671972(-)_transcript=ENSMUST00000162342.7	Ap1s3	2876	2676.99	11.3492	0.00959761	0.00959761	Down	spliced
Ap2a1_chr7_44900373_44929496(-)_transcript=ENSMUST00000167930.7	Ap2a1	3376	3176.99	45.5147	0	0	No Change High Expression	spliced
Ap2a2_chr7_141562173_141633011(+)_transcript=ENSMUST00000003038.11	Ap2a2	4646	4446.99	46.5067	0.0959761	-0.0728579	No Change High Expression	spliced
Ap2b1_chr11_83299024_83405035(+)_transcript=ENSMUST00000018875.12	Ap2b1	5625	5425.99	40.782	0	0	No Change High Expression	spliced
Ap2m1_chr16_20535478_20544909(+)_transcript=ENSMUST00000090023.12	Ap2m1	2080	1880.99	90.5114	0	0	No Change High Expression	spliced
Ap2m1-ps_chr2_49308155_49309462(+)_transcript=ENSMUST00000119733.1	Ap2m1-ps	1308	1108.99	23.5044	0	0	No Change High Expression	spliced
Ap2s1_chr7_16738410_16749294(+)_transcript=ENSMUST00000086112.7	Ap2s1	836	636.994	46.2569	0	0	No Change High Expression	spliced
Ap3b1_chr13_94358960_94566317(+)_transcript=ENSMUST00000022196.4	Ap3b1	4021	3821.99	50.0379	4.7128	0.66279	No Change High Expression	spliced
Ap3b2_chr7_81460399_81493925(-)_transcript=ENSMUST00000082090.14	Ap3b2	3806	3606.99	10.0399	0	-0.0153485	No Change Medium Expression	spliced
Ap3d1_chr10_80706956_80742264(-)_transcript=ENSMUST00000020420.8	Ap3d1	4805	4605.99	40.4791	0.0287928	0.0287928	No Change High Expression	spliced
Ap3m1_chr14_21031442_21052508(-)_transcript=ENSMUST00000022371.9	Ap3m1	1770	1570.99	17.9841	0	0	No Change High Expression	spliced
Ap3m1-ps_chr10_82585426_82586683(+)_transcript=ENSMUST00000177652.2	Ap3m1-ps	1258	1058.99	4.48353	0	0	No Change Medium Expression	spliced
Ap3m2_chr8_22787354_22805622(-)_transcript=ENSMUST00000163739.2	Ap3m2	3417	3217.99	1.33077	0	-1.12048e-07	No Change Medium Expression	spliced
Ap3s1_chr18_46741876_46790826(+)_transcript=ENSMUST00000224622.1	Ap3s1	978	778.994	18.9975	0	0	No Change High Expression	spliced
Ap3s1-ps1_chrX_38685592_38686170(-)_transcript=ENSMUST00000117113.1	Ap3s1-ps1	579	379.994	1.81388	0	0	No Change Medium Expression	spliced
Ap3s2_chr7_79875325_79920649(-)_transcript=ENSMUST00000075657.7	Ap3s2	5813	5613.99	12.4627	0.087056	-0.020384	No Change Medium Expression	spliced
Ap4b1_chr3_103809520_103822025(+)_transcript=ENSMUST00000047285.6	Ap4b1	2799	2599.99	5.75631	0	0	No Change Medium Expression	spliced
Ap4e1_chr2_127008717_127067909(+)_transcript=ENSMUST00000002063.14	Ap4e1	4600	4400.99	7.66508	0	0	No Change Medium Expression	spliced
Ap4m1_chr5_138172002_138180429(+)_transcript=ENSMUST00000019662.10	Ap4m1	3479	3279.99	6.84984	0	0	No Change Medium Expression	spliced
Ap4s1_chr12_51691033_51744786(+)_transcript=ENSMUST00000021338.9	Ap4s1	1035	835.994	10.5734	0.0635515	0.0635515	No Change Medium Expression	spliced
Ap5b1_chr19_5568025_5571261(+)_transcript=ENSMUST00000235575.1	Ap5b1	2785	2585.99	2.54907	0	0	No Change Medium Expression	spliced
Ap5m1_chr14_49066097_49094234(+)_transcript=ENSMUST00000037473.5	Ap5m1	6321	6121.99	6.43773	0	0	No Change Medium Expression	spliced
Ap5s1_chr2_131207078_131213514(+)_transcript=ENSMUST00000110208.7	Ap5s1	1521	1321.99	2.83088	0	0	No Change Medium Expression	spliced
Ap5z1_chr5_142463944_142478710(+)_transcript=ENSMUST00000038699.12	Ap5z1	3689	3489.99	3.12441	0	0	No Change Medium Expression	spliced
Apaf1_chr10_90989311_91082770(-)_transcript=ENSMUST00000159110.7	Apaf1	6433	6233.99	17.1339	0	0	No Change High Expression	spliced
Apba1_chr19_23758887_23949596(+)_transcript=ENSMUST00000237688.1	Apba1	3174	2974.99	0.226376	0	0	No Change Low Expression	spliced
Apba2_chr7_64501706_64753878(+)_transcript=ENSMUST00000032732.14	Apba2	3321	3121.99	0.604447	0.0287928	0.0287928	No Change Low Expression	spliced
Apba3_chr10_81266960_81273246(+)_transcript=ENSMUST00000057798.8	Apba3	2106	1906.99	10.4621	0	0	No Change Medium Expression	spliced
Apbb1_chr7_105558483_105581653(-)_transcript=ENSMUST00000191601.6	Apbb1	2690	2490.99	2.7668	0	0	No Change Medium Expression	spliced
Apbb2_chr5_66298703_66618784(-)_transcript=ENSMUST00000159786.7	Apbb2	6333	6133.99	3.79631	0.0745497	-0.0027582	No Change Medium Expression	spliced
Apbb3_chr18_36671154_36679366(-)_transcript=ENSMUST00000001415.8	Apbb3	2067	1867.99	4.4224	0	0	No Change Medium Expression	spliced
Apc_chr18_34220924_34322552(+)_transcript=ENSMUST00000115781.9	Apc	12346	12147	26.0025	0	0	No Change High Expression	spliced
Apc2_chr10_80295977_80318263(+)_transcript=ENSMUST00000105359.7	Apc2	9173	8973.99	0.38278	0	0	No Change Low Expression	spliced
Apcdd1_chr18_62922231_62961179(+)_transcript=ENSMUST00000096554.11	Apcdd1	1842	1642.99	2.30716	0	0	No Change Medium Expression	spliced
Apeh_chr9_108085413_108094606(-)_transcript=ENSMUST00000193254.5	Apeh	2518	2318.99	10.8822	0	0	No Change Medium Expression	spliced
Apela_chr8_65028417_65037336(-)_transcript=ENSMUST00000142822.3	Apela	975	775.994	66.6032	0	0	No Change High Expression	spliced
Apex1_chr14_50924968_50927139(+)_transcript=ENSMUST00000049411.11	Apex1	1239	1039.99	119.106	0	0	No Change High Expression	spliced
Apex2_chrX_150519519_150589868(-)_transcript=ENSMUST00000026303.15	Apex2	1884	1684.99	5.5926	2.36888e-09	-2.59536e-08	No Change Medium Expression	spliced
Aph1a_chr3_95893969_95898288(+)_transcript=ENSMUST00000056710.9	Aph1a	1601	1401.99	14.5413	0	0	No Change Medium Expression	spliced
Aph1b_chr9_66775202_66795490(-)_transcript=ENSMUST00000113730.2	Aph1b	682	482.994	0.538707	0	0	No Change Low Expression	spliced
Aph1c_chr9_66814994_66834726(-)_transcript=ENSMUST00000057261.8	Aph1c	715	515.994	0.550282	0	0	No Change Low Expression	spliced
Api5_chr2_94411682_94438136(-)_transcript=ENSMUST00000028617.6	Api5	3736	3536.99	88.9931	0.0383904	-0.0537007	No Change High Expression	spliced
Apip_chr2_103073675_103092644(+)_transcript=ENSMUST00000011055.6	Apip	919	719.994	10.1178	0.00959761	0.00959761	No Change Medium Expression	spliced
Aplf_chr6_87628424_87672193(-)_transcript=ENSMUST00000032130.7	Aplf	1889	1689.99	2.67755	0	0	No Change Medium Expression	spliced
Apln_chrX_48025146_48034853(-)_transcript=ENSMUST00000039026.7	Apln	3149	2949.99	0.257799	0	0	No Change Low Expression	spliced
Aplp1_chr7_30434982_30445535(-)_transcript=ENSMUST00000006828.8	Aplp1	2343	2143.99	15.5106	0	0	Up	spliced
Aplp2_chr9_31149557_31211815(-)_transcript=ENSMUST00000072634.14	Aplp2	3634	3434.99	69.4875	0	0	No Change High Expression	spliced
Apmap_chr2_150583080_150608567(-)_transcript=ENSMUST00000046399.6	Apmap	2235	2035.99	6.6024	0	0	No Change Medium Expression	spliced
Apoa2_chr1_171225054_171226379(+)_transcript=ENSMUST00000005824.11	Apoa2	492	292.994	12.3505	0	0	No Change Medium Expression	spliced
Apob_chr12_7977648_8016835(+)_transcript=ENSMUST00000037811.12	Apob	13934	13735	0.333428	0	0	No Change Low Expression	spliced
Apobec1_chr6_122577792_122602444(-)_transcript=ENSMUST00000112585.7	Apobec1	2127	1927.99	1.50612	0	0	No Change Medium Expression	spliced
Apobec2_chr17_48419231_48432930(-)_transcript=ENSMUST00000046549.4	Apobec2	1420	1220.99	4.78633	0	0	No Change Medium Expression	spliced
Apobec3_chr15_79891659_79915906(+)_transcript=ENSMUST00000175714.7	Apobec3	1953	1753.99	29.645	0	0	Up	spliced
Apobr_chr7_126584942_126589112(+)_transcript=ENSMUST00000039522.7	Apobr	3685	3485.99	0.665358	0	0	No Change Low Expression	spliced
Apoc1_chr7_19689481_19692660(-)_transcript=ENSMUST00000045035.11	Apoc1	432	232.994	38.4192	0	0	No Change High Expression	spliced
Apod_chr16_31296192_31314808(-)_transcript=ENSMUST00000115230.1	Apod	1070	870.994	3.47077	0	0	No Change Medium Expression	spliced
Apoe_chr7_19696109_19699188(-)_transcript=ENSMUST00000173739.7	Apoe	1221	1021.99	323.324	0	-0.0153485	No Change High Expression	spliced
Apold1_chr6_134981718_134986836(+)_transcript=ENSMUST00000167323.2	Apold1	3567	3367.99	0.143388	0	0	No Change Low Expression	spliced
Apom_chr17_35128997_35132050(-)_transcript=ENSMUST00000025249.6	Apom	1013	813.994	0.698618	0	0	No Change Low Expression	spliced
Apon_chr10_128254096_128255896(+)_transcript=ENSMUST00000218722.1	Apon	1747	1547.99	0.481612	0	0	No Change Low Expression	spliced
Apoo_chrX_94367117_94417093(+)_transcript=ENSMUST00000113896.7	Apoo	1032	832.994	17.915	0	0	No Change High Expression	spliced
Apool_chrX_112311334_112372755(+)_transcript=ENSMUST00000026599.9	Apool	1359	1159.99	8.34863	0	0	No Change Medium Expression	spliced
Apopt1_chr12_111713261_111755053(+)_transcript=ENSMUST00000040519.11	Apopt1	1065	865.994	15.5075	0.0383904	-0.0191815	No Change Medium Expression	spliced
App_chr16_84949685_85173766(-)_transcript=ENSMUST00000226232.1	App	3120	2920.99	7.69049	0.16091	0.16091	No Change Medium Expression	spliced
Appbp2_chr11_85187262_85235130(-)_transcript=ENSMUST00000018625.9	Appbp2	6463	6263.99	37.3866	0	0	No Change High Expression	spliced
Appl1_chr14_26918988_26971232(-)_transcript=ENSMUST00000036570.4	Appl1	7642	7442.99	15.0518	0.00959761	0.00959761	No Change Medium Expression	spliced
Appl2_chr10_83600033_83648738(-)_transcript=ENSMUST00000020500.13	Appl2	3020	2820.99	9.9221	0	0	No Change Medium Expression	spliced
Aprt_chr8_122574635_122576909(-)_transcript=ENSMUST00000006764.8	Aprt	849	649.994	108.52	0	0	No Change High Expression	spliced
Aptx_chr4_40682382_40703194(-)_transcript=ENSMUST00000068125.10	Aptx	5383	5183.99	2.01996	0	0	No Change Medium Expression	spliced
Aqp11_chr7_97724006_97738289(-)_transcript=ENSMUST00000206389.1	Aqp11	3737	3537.99	0.529621	0	0	No Change Low Expression	spliced
Aqp3_chr4_41092722_41098183(-)_transcript=ENSMUST00000055327.7	Aqp3	1765	1565.99	11.7775	0	0	No Change Medium Expression	spliced
Aqp5_chr15_99590782_99594829(+)_transcript=ENSMUST00000231163.1	Aqp5	831	631.994	0.64459	0	0	No Change Low Expression	spliced
Aqr_chr2_114101170_114187024(-)_transcript=ENSMUST00000043160.12	Aqr	4888	4688.99	60.8085	0	0	No Change High Expression	spliced
Ar_chrX_98148769_98323215(+)_transcript=ENSMUST00000052837.8	Ar	10048	9848.99	0.320696	0.124183	0.124183	No Change Low Expression	spliced
Araf_chrX_20797814_20860519(+)_transcript=ENSMUST00000001155.10	Araf	2358	2158.99	13.1055	0	-0.0153485	No Change Medium Expression	spliced
Arap1_chr7_101348067_101412586(+)_transcript=ENSMUST00000107010.8	Arap1	5147	4947.99	7.3833	0	0	No Change Medium Expression	spliced
Arap2_chr5_62602445_62766159(-)_transcript=ENSMUST00000076623.7	Arap2	7306	7106.99	7.34896	2.74303	1.23801	Down	spliced
Arap3_chr18_37972628_37998969(-)_transcript=ENSMUST00000042944.8	Arap3	5219	5019.99	3.13713	0.0191952	-0.0268504	No Change Medium Expression	spliced
Arc_chr15_74669083_74672570(-)_transcript=ENSMUST00000023268.13	Arc	3055	2855.99	3.27212	0	0	No Change Medium Expression	spliced
Arcn1_chr9_44741564_44767845(-)_transcript=ENSMUST00000034607.9	Arcn1	4072	3872.99	121.547	0	0	No Change High Expression	spliced
Arel1_chr12_84918148_84970900(-)_transcript=ENSMUST00000043169.13	Arel1	5446	5246.99	13.0365	0	-0.0153485	No Change Medium Expression	spliced
Arf1_chr11_59211412_59228270(-)_transcript=ENSMUST00000061242.7	Arf1	1800	1600.99	169.11	0	0	No Change High Expression	spliced
Arf2_chr11_103966739_103985337(+)_transcript=ENSMUST00000057921.9	Arf2	2242	2042.99	10.1956	0	0	No Change Medium Expression	spliced
Arf3_chr15_98736634_98763214(-)_transcript=ENSMUST00000053183.11	Arf3	4566	4366.99	27.6269	0	0	No Change High Expression	spliced
Arf4_chr14_26638074_26665084(+)_transcript=ENSMUST00000112318.9	Arf4	1367	1167.99	63.0155	0	0	No Change High Expression	spliced
Arf5_chr6_28423560_28426602(+)_transcript=ENSMUST00000020717.11	Arf5	1116	916.994	24.063	0	0	No Change High Expression	spliced
Arf6_chr12_69372150_69373783(+)_transcript=ENSMUST00000050063.8	Arf6	1534	1334.99	71.78	0	0	No Change High Expression	spliced
Arfgap1_chr2_180967225_180982526(+)_transcript=ENSMUST00000029092.12	Arfgap1	2714	2514.99	10.5991	0	0	No Change Medium Expression	spliced
Arfgap2_chr2_91264974_91276931(+)_transcript=ENSMUST00000028691.6	Arfgap2	2791	2591.99	7.42024	0	0	No Change Medium Expression	spliced
Arfgap3_chr15_83299739_83350247(-)_transcript=ENSMUST00000067215.8	Arfgap3	2619	2419.99	3.64332	0	0	No Change Medium Expression	spliced
Arfgef1_chr1_10137571_10232670(-)_transcript=ENSMUST00000088615.10	Arfgef1	6978	6778.99	17.9521	1.36902	0.27146	No Change High Expression	spliced
Arfgef2_chr2_166805588_166898052(+)_transcript=ENSMUST00000099078.9	Arfgef2	8770	8570.99	15.0699	0	-0.030697	No Change Medium Expression	spliced
Arfgef3_chr10_18581839_18743949(-)_transcript=ENSMUST00000215836.1	Arfgef3	14579	14380	2.09633	2.50716	1.59807	No Change Medium Expression	spliced
Arfip1_chr3_84496093_84582625(-)_transcript=ENSMUST00000098990.9	Arfip1	2799	2599.99	11.7299	0	0	No Change Medium Expression	spliced
Arfip2_chr7_105634203_105640416(-)_transcript=ENSMUST00000084782.9	Arfip2	2254	2054.99	7.99856	0	0	No Change Medium Expression	spliced
Arfrp1_chr2_181357690_181365404(-)_transcript=ENSMUST00000108808.7	Arfrp1	1133	933.994	12.7272	0	0	No Change Medium Expression	spliced
Arglu1_chr8_8665075_8690521(-)_transcript=ENSMUST00000048545.9	Arglu1	3197	2997.99	42.3506	62.6973	37.3679	No Change High Expression	spliced
Arhgap1_chr2_91649860_91672326(+)_transcript=ENSMUST00000090614.10	Arhgap1	2866	2666.99	21.4903	0	0	No Change High Expression	spliced
Arhgap10_chr8_77250366_77517953(-)_transcript=ENSMUST00000210922.1	Arhgap10	2208	2008.99	12.9312	0	-0.184647	No Change Medium Expression	spliced
Arhgap11a_chr2_113831492_113848661(-)_transcript=ENSMUST00000110949.8	Arhgap11a	4458	4258.99	33.8654	0	0	No Change High Expression	spliced
Arhgap12_chr18_6024427_6136098(-)_transcript=ENSMUST00000182383.7	Arhgap12	2500	2300.99	11.9639	0.571961	-0.652409	No Change Medium Expression	spliced
Arhgap17_chr7_123279218_123369915(-)_transcript=ENSMUST00000106442.8	Arhgap17	3336	3136.99	9.55576	0	0	No Change Medium Expression	spliced
Arhgap18_chr10_26753421_26918648(+)_transcript=ENSMUST00000039557.8	Arhgap18	3651	3451.99	2.22065	0.142185	0.0807909	No Change Medium Expression	spliced
Arhgap19_chr19_41766588_41802047(-)_transcript=ENSMUST00000026150.14	Arhgap19	5103	4903.99	34.3183	0.00350736	-0.0118411	No Change High Expression	spliced
Arhgap20_chr9_51765337_51853856(+)_transcript=ENSMUST00000130405.1	Arhgap20	3881	3681.99	0.224976	0	0	No Change Low Expression	spliced
Arhgap21_chr2_20847919_20968881(-)_transcript=ENSMUST00000173194.7	Arhgap21	6920	6720.99	24.843	2.59087	0.24629	No Change High Expression	spliced
Arhgap22_chr14_33214026_33369934(+)_transcript=ENSMUST00000111956.8	Arhgap22	2596	2396.99	2.59474	0	-0.0153485	No Change Medium Expression	spliced
Arhgap23_chr11_97415533_97502402(+)_transcript=ENSMUST00000121799.7	Arhgap23	5816	5616.99	10.8626	0	0	No Change Medium Expression	spliced
Arhgap24_chr5_102481391_102897937(+)_transcript=ENSMUST00000094559.8	Arhgap24	3346	3146.99	0.287374	0	0	No Change Low Expression	spliced
Arhgap26_chr18_38993145_39376284(+)_transcript=ENSMUST00000155576.7	Arhgap26	2280	2080.99	1.47114	0.0863785	0.0329092	No Change Medium Expression	spliced
Arhgap27_chr11_103331497_103363692(-)_transcript=ENSMUST00000041385.13	Arhgap27	3512	3312.99	3.7826	0	0	No Change Medium Expression	spliced
Arhgap28_chr17_67842713_68004120(-)_transcript=ENSMUST00000024840.11	Arhgap28	5322	5122.99	6.29357	0.191467	-0.145346	No Change Medium Expression	spliced
Arhgap29_chr3_121952541_122016753(+)_transcript=ENSMUST00000037958.13	Arhgap29	5787	5587.99	13.5503	2.53132	1.10489	No Change Medium Expression	spliced
Arhgap30_chr1_171388954_171410298(+)_transcript=ENSMUST00000056449.8	Arhgap30	4494	4294.99	1.05493	0	-0.0153485	Up	spliced
Arhgap31_chr16_38598340_38713274(-)_transcript=ENSMUST00000023487.4	Arhgap31	7964	7764.99	0.576238	0.108502	0.108502	No Change Low Expression	spliced
Arhgap32_chr9_32116136_32268446(+)_transcript=ENSMUST00000168954.8	Arhgap32	8703	8503.99	10.1853	0	0	No Change Medium Expression	spliced
Arhgap33_chr7_30522226_30535060(-)_transcript=ENSMUST00000207858.1	Arhgap33	4337	4137.99	2.04977	0	0	No Change Medium Expression	spliced
Arhgap33os_chr7_30515122_30522193(+)_transcript=ENSMUST00000238768.1	Arhgap33os	2117	1917.99	0.391491	0	0	No Change Low Expression	spliced
Arhgap35_chr7_16493719_16614993(-)_transcript=ENSMUST00000171937.1	Arhgap35	6251	6051.99	25.7162	0	0	Down	spliced
Arhgap39_chr15_76723985_76818170(-)_transcript=ENSMUST00000036176.15	Arhgap39	4500	4300.99	6.15166	0	0	No Change Medium Expression	spliced
Arhgap4_chrX_73891442_73921870(-)_transcript=ENSMUST00000114407.8	Arhgap4	3051	2851.99	1.39755	0.226867	-0.332079	No Change Medium Expression	spliced
Arhgap42_chr9_8994329_9239101(-)_transcript=ENSMUST00000093893.11	Arhgap42	6116	5916.99	6.90574	0.758934	0.003383	No Change Medium Expression	spliced
Arhgap44_chr11_65002039_65162961(-)_transcript=ENSMUST00000047463.14	Arhgap44	4074	3874.99	5.34006	0	0	No Change Medium Expression	spliced
Arhgap45_chr10_80016653_80031472(+)_transcript=ENSMUST00000043311.6	Arhgap45	3499	3299.99	7.0201	0	0	Up	spliced
Arhgap5_chr12_52503972_52571975(+)_transcript=ENSMUST00000110725.1	Arhgap5	5197	4997.99	42.3391	0	0	No Change High Expression	spliced
Arhgap6_chrX_168795099_169304435(+)_transcript=ENSMUST00000087016.10	Arhgap6	1310	1110.99	0.141963	0	0	No Change Low Expression	spliced
Arhgap8_chr15_84720052_84772207(+)_transcript=ENSMUST00000006029.10	Arhgap8	1527	1327.99	9.20408	0	0	No Change Medium Expression	spliced
Arhgap9_chr10_127321964_127329943(+)_transcript=ENSMUST00000069548.6	Arhgap9	1782	1582.99	2.2828	0.0191952	0.0038467	No Change Medium Expression	spliced
Arhgdia_chr11_120578104_120581624(-)_transcript=ENSMUST00000106197.9	Arhgdia	1867	1667.99	227.711	0.0191952	0.0191952	No Change High Expression	spliced
Arhgdib_chr6_136923655_136941899(-)_transcript=ENSMUST00000111892.7	Arhgdib	1153	953.994	0.986226	0	0	No Change Low Expression	spliced
Arhgdig_chr17_26199183_26207786(-)_transcript=ENSMUST00000025019.8	Arhgdig	1032	832.994	8.56015	0	0	No Change Medium Expression	spliced
Arhgef1_chr7_24902912_24926594(+)_transcript=ENSMUST00000117419.7	Arhgef1	3214	3014.99	26.3492	0	-3.19014e-05	No Change High Expression	spliced
Arhgef10_chr8_14911663_15001085(+)_transcript=ENSMUST00000084207.11	Arhgef10	5528	5328.99	4.0657	0.198681	-0.108289	No Change Medium Expression	spliced
Arhgef10l_chr4_140514485_140666012(-)_transcript=ENSMUST00000097820.8	Arhgef10l	4382	4182.99	1.91894	0	0	No Change Medium Expression	spliced
Arhgef11_chr3_87617559_87738034(+)_transcript=ENSMUST00000039476.14	Arhgef11	6776	6576.99	10.0275	0.228506	-0.155207	No Change Medium Expression	spliced
Arhgef12_chr9_42963842_43107239(-)_transcript=ENSMUST00000165665.8	Arhgef12	10752	10553	12.819	0	0	No Change Medium Expression	spliced
Arhgef15_chr11_68943155_68957480(-)_transcript=ENSMUST00000065040.12	Arhgef15	4123	3923.99	2.08404	0.0191952	0.0191952	No Change Medium Expression	spliced
Arhgef16_chr4_154278486_154301676(-)_transcript=ENSMUST00000030898.11	Arhgef16	2860	2660.99	4.3457	0	0	No Change Medium Expression	spliced
Arhgef17_chr7_100869752_100932107(-)_transcript=ENSMUST00000107032.2	Arhgef17	10190	9990.99	7.21311	1.38206	0.783468	No Change Medium Expression	spliced
Arhgef18_chr8_3353415_3456601(+)_transcript=ENSMUST00000004684.12	Arhgef18	5271	5071.99	17.5607	0	0	Up	spliced
Arhgef19_chr4_141239499_141257564(+)_transcript=ENSMUST00000006618.8	Arhgef19	3414	3214.99	3.05962	0.0383904	0.0383904	No Change Medium Expression	spliced
Arhgef2_chr3_88605966_88648052(+)_transcript=ENSMUST00000029694.13	Arhgef2	4300	4100.99	19.2114	0	0	No Change High Expression	spliced
Arhgef25_chr10_127182525_127190083(-)_transcript=ENSMUST00000167353.2	Arhgef25	2189	1989.99	9.49666	0	0	No Change Medium Expression	spliced
Arhgef26_chr3_62338344_62462221(+)_transcript=ENSMUST00000079300.12	Arhgef26	5638	5438.99	1.39916	0	-0.0460456	No Change Medium Expression	spliced
Arhgef28_chr13_97899469_98206439(-)_transcript=ENSMUST00000109426.2	Arhgef28	5387	5187.99	2.40812	0.268733	0.176642	No Change Medium Expression	spliced
Arhgef3_chr14_27114899_27403911(+)_transcript=ENSMUST00000224981.1	Arhgef3	3618	3418.99	6.70293	0.039315	-0.298353	No Change Medium Expression	spliced
Arhgef33_chr17_80307407_80400081(+)_transcript=ENSMUST00000225223.2	Arhgef33	714	514.994	0.484572	0	0	No Change Low Expression	spliced
Arhgef37_chr18_61491657_61536594(-)_transcript=ENSMUST00000171629.2	Arhgef37	5429	5229.99	0.333294	0	0	No Change Low Expression	spliced
Arhgef39_chr4_43496142_43499695(-)_transcript=ENSMUST00000054538.12	Arhgef39	1659	1459.99	8.45516	0	0	No Change Medium Expression	spliced
Arhgef4_chr1_34678188_34813309(+)_transcript=ENSMUST00000159747.8	Arhgef4	6514	6314.99	1.38036	0.0315247	0.0166544	No Change Medium Expression	spliced
Arhgef40_chr14_51984719_52006251(+)_transcript=ENSMUST00000100639.10	Arhgef40	4843	4643.99	2.22977	1.3278e-09	-3.05103e-08	No Change Medium Expression	spliced
Arhgef5_chr6_43265582_43289320(+)_transcript=ENSMUST00000031750.13	Arhgef5	5469	5269.99	3.72036	10.9166	7.06412	Down	spliced
Arhgef6_chrX_57231485_57338729(-)_transcript=ENSMUST00000033468.10	Arhgef6	4569	4369.99	0.198828	0	0	No Change Low Expression	spliced
Arhgef7_chr8_11727721_11835219(+)_transcript=ENSMUST00000074856.12	Arhgef7	4451	4251.99	18.932	0.219303	0.08606	No Change High Expression	spliced
Arhgef9_chrX_95048935_95196856(-)_transcript=ENSMUST00000113885.7	Arhgef9	4578	4378.99	0.593597	0	0	No Change Low Expression	spliced
Arid1a_chr4_133679008_133756769(-)_transcript=ENSMUST00000145664.8	Arid1a	8187	7987.99	63.1634	0	0	No Change High Expression	spliced
Arid1b_chr17_4994332_5347656(+)_transcript=ENSMUST00000232180.1	Arid1b	7309	7109.99	9.62846	0	-3.33276e-10	No Change Medium Expression	spliced
Arid2_chr15_96287518_96404992(+)_transcript=ENSMUST00000096250.4	Arid2	8507	8307.99	39.0207	1.02962	-0.04037	Down	spliced
Arid3a_chr10_79927043_79955018(+)_transcript=ENSMUST00000019708.11	Arid3a	5361	5161.99	8.70057	0	0	No Change Medium Expression	spliced
Arid3b_chr9_57790353_57836793(-)_transcript=ENSMUST00000004780.15	Arid3b	3785	3585.99	16.4329	0	0	No Change High Expression	spliced
Arid3c_chr4_41723836_41731142(-)_transcript=ENSMUST00000171251.7	Arid3c	1751	1551.99	0.354419	0	0	No Change Low Expression	spliced
Arid4a_chr12_71015990_71098592(+)_transcript=ENSMUST00000046305.11	Arid4a	4998	4798.99	16.3608	1.53118	-0.33242	No Change High Expression	spliced
Arid4b_chr13_14063232_14199603(+)_transcript=ENSMUST00000110534.7	Arid4b	5864	5664.99	21.4402	68.918	46.2065	No Change High Expression	spliced
Arid5a_chr1_36307733_36324029(+)_transcript=ENSMUST00000097778.8	Arid5a	2270	2070.99	1.38483	0	0	No Change Medium Expression	spliced
Arid5b_chr10_68092520_68278740(-)_transcript=ENSMUST00000219238.1	Arid5b	7581	7381.99	32.555	0.30197	0.277101	No Change High Expression	spliced
Arih1_chr9_59388258_59486618(-)_transcript=ENSMUST00000165322.1	Arih1	1431	1231.99	50.2136	0.309511	-0.539855	Down	spliced
Arih2_chr9_108602942_108649386(-)_transcript=ENSMUST00000013338.13	Arih2	3924	3724.99	33.654	0	-0.0140025	No Change High Expression	spliced
Arl1_chr10_88730858_88744094(+)_transcript=ENSMUST00000116234.8	Arl1	2080	1880.99	40.01	0	0	No Change High Expression	spliced
Arl10_chr13_54575015_54581128(+)_transcript=ENSMUST00000026988.10	Arl10	1046	846.994	3.68672	0	0	No Change Medium Expression	spliced
Arl13b_chr16_62793685_62847040(-)_transcript=ENSMUST00000089289.5	Arl13b	3528	3328.99	6.96316	0	0	No Change Medium Expression	spliced
Arl14ep_chr2_106962527_106974424(-)_transcript=ENSMUST00000028536.12	Arl14ep	3337	3137.99	14.888	0.0966854	0.0659884	No Change Medium Expression	spliced
Arl14epl_chr18_46921815_46934232(+)_transcript=ENSMUST00000234910.1	Arl14epl	2257	2057.99	25.611	0.224197	0.224197	No Change High Expression	spliced
Arl15_chr13_113794505_114157461(+)_transcript=ENSMUST00000091201.6	Arl15	3364	3164.99	14.3886	0.0383904	0.017824	No Change Medium Expression	spliced
Arl16_chr11_120464866_120467607(-)_transcript=ENSMUST00000076921.6	Arl16	911	711.994	2.56089	0.653009	0.220504	No Change Medium Expression	spliced
Arl2_chr19_6134374_6141548(-)_transcript=ENSMUST00000025893.6	Arl2	1286	1086.99	16.5917	0	0	No Change High Expression	spliced
Arl2bp_chr8_94666600_94674425(+)_transcript=ENSMUST00000034228.15	Arl2bp	2063	1863.99	29.3465	0	0	No Change High Expression	spliced
Arl3_chr19_46531096_46573198(-)_transcript=ENSMUST00000026009.9	Arl3	843	643.994	17.8263	0	0	No Change High Expression	spliced
Arl4a_chr12_40005447_40038025(-)_transcript=ENSMUST00000101472.3	Arl4a	1200	1000.99	25.5021	0	0	No Change High Expression	spliced
Arl4c_chr1_88673125_88702221(-)_transcript=ENSMUST00000159814.1	Arl4c	3997	3797.99	19.0934	0	0	Down	spliced
Arl4d_chr11_101665541_101667832(+)_transcript=ENSMUST00000039388.2	Arl4d	1382	1182.99	3.36704	0	0	No Change Medium Expression	spliced
Arl5a_chr2_52397951_52424901(-)_transcript=ENSMUST00000036541.7	Arl5a	5239	5039.99	19.5569	0.230343	-0.287031	Down	spliced
Arl5b_chr2_15049395_15082456(+)_transcript=ENSMUST00000069870.10	Arl5b	6981	6781.99	13.319	0	0	No Change Medium Expression	spliced
Arl5c_chr11_97989578_97996181(-)_transcript=ENSMUST00000042971.15	Arl5c	1571	1371.99	1.47287	0.0161096	-0.0265051	No Change Medium Expression	spliced
Arl6_chr16_59612949_59639391(-)_transcript=ENSMUST00000118438.7	Arl6	875	675.994	5.81713	0.0671833	0.0211377	No Change Medium Expression	spliced
Arl6ip1_chr7_118118891_118129662(-)_transcript=ENSMUST00000032888.9	Arl6ip1	2171	1971.99	138.791	0	0	No Change High Expression	spliced
Arl6ip4_chr5_124116089_124118196(+)_transcript=ENSMUST00000031351.10	Arl6ip4	1192	992.994	37.7472	0	0	No Change High Expression	spliced
Arl6ip5_chr6_97210689_97233315(+)_transcript=ENSMUST00000044681.6	Arl6ip5	1442	1242.99	12.9189	0.0959761	-0.0728579	No Change Medium Expression	spliced
Arl6ip6_chr2_53191726_53219220(+)_transcript=ENSMUST00000028336.6	Arl6ip6	2548	2348.99	19.1132	0	0	No Change High Expression	spliced
Arl8a_chr1_135146824_135156269(+)_transcript=ENSMUST00000027684.10	Arl8a	1713	1513.99	24.1778	0	0	No Change High Expression	spliced
Arl8b_chr6_108783099_108825278(+)_transcript=ENSMUST00000204483.1	Arl8b	695	495.994	14.8688	0	0	No Change Medium Expression	spliced
Armc1_chr3_19131402_19163065(-)_transcript=ENSMUST00000029125.9	Armc1	3673	3473.99	19.9436	0.00959761	0.00959761	No Change High Expression	spliced
Armc10_chr5_21645813_21662694(+)_transcript=ENSMUST00000072896.12	Armc10	2221	2021.99	39.7531	1.19854	0.328831	No Change High Expression	spliced
Armc2_chr10_41914990_42018442(-)_transcript=ENSMUST00000162405.7	Armc2	1135	935.994	1.27305	0	0	No Change Medium Expression	spliced
Armc5_chr7_128237342_128245100(+)_transcript=ENSMUST00000044660.5	Armc5	3834	3634.99	3.56398	0	0	No Change Medium Expression	spliced
Armc6_chr8_70220172_70234466(-)_transcript=ENSMUST00000019679.11	Armc6	2263	2063.99	7.25606	0.00959761	0.00959761	No Change Medium Expression	spliced
Armc7_chr11_115475667_115490467(+)_transcript=ENSMUST00000035240.6	Armc7	2260	2060.99	0.477446	0	0	No Change Low Expression	spliced
Armc8_chr9_99478372_99568899(-)_transcript=ENSMUST00000035043.11	Armc8	4647	4447.99	10.997	0.283766	0.053538	No Change Medium Expression	spliced
Armc9_chr1_86154780_86278284(+)_transcript=ENSMUST00000131412.7	Armc9	2160	1960.99	4.61437	0.134367	-0.00377	No Change Medium Expression	spliced
Armcx1_chrX_134717963_134721917(+)_transcript=ENSMUST00000051256.9	Armcx1	2253	2053.99	7.94084	0	0	No Change Medium Expression	spliced
Armcx2_chrX_134804145_134809221(-)_transcript=ENSMUST00000035559.10	Armcx2	3384	3184.99	6.99316	0	0	No Change Medium Expression	spliced
Armcx3_chrX_134756595_134761455(+)_transcript=ENSMUST00000081834.9	Armcx3	3327	3127.99	2.7166	0	0	No Change Medium Expression	spliced
Armcx4_chrX_134686519_134696757(+)_transcript=ENSMUST00000124226.2	Armcx4	7996	7796.99	13.2172	1.89073	1.06191	No Change Medium Expression	spliced
Armcx5_chrX_135742733_135747322(+)_transcript=ENSMUST00000096321.2	Armcx5	2779	2579.99	4.55279	0	0	No Change Medium Expression	spliced
Armcx6_chrX_134748461_134751417(-)_transcript=ENSMUST00000052431.11	Armcx6	2024	1824.99	0.743218	0.589085	0.376545	No Change Low Expression	spliced
Armh3_chr19_45817364_45998488(-)_transcript=ENSMUST00000045396.8	Armh3	3676	3476.99	21.4906	0.124769	-0.136156	No Change High Expression	spliced
Armh4_chr14_49675952_49783383(-)_transcript=ENSMUST00000118129.1	Armh4	3100	2900.99	1.62206	0.0430178	0.0430178	No Change Medium Expression	spliced
Armt1_chr10_4432467_4455141(+)_transcript=ENSMUST00000095893.10	Armt1	2429	2229.99	20.3206	0	0	No Change High Expression	spliced
Arnt_chr3_95434388_95497240(+)_transcript=ENSMUST00000102749.10	Arnt	2699	2499.99	18.8111	0	0	No Change High Expression	spliced
Arnt2_chr7_84246278_84410176(-)_transcript=ENSMUST00000208232.1	Arnt2	6047	5847.99	1.70908	0.282685	0.006412	No Change Medium Expression	spliced
Arntl_chr7_113207465_113314126(+)_transcript=ENSMUST00000047321.8	Arntl	2908	2708.99	7.93919	0	0	No Change Medium Expression	spliced
Arntl2_chr6_146796055_146833529(+)_transcript=ENSMUST00000111639.7	Arntl2	2923	2723.99	3.27577	0	0	No Change Medium Expression	spliced
Arpc1a_chr5_145083830_145108761(+)_transcript=ENSMUST00000031625.14	Arpc1a	1632	1432.99	47.9135	0	0	No Change High Expression	spliced
Arpc1b_chr5_145114215_145130705(+)_transcript=ENSMUST00000196111.4	Arpc1b	1394	1194.99	25.5472	0	0	No Change High Expression	spliced
Arpc2_chr1_74236084_74268209(+)_transcript=ENSMUST00000113820.8	Arpc2	1439	1239.99	101.026	0	0	No Change High Expression	spliced
Arpc3_chr5_122391878_122414184(+)_transcript=ENSMUST00000031421.11	Arpc3	736	536.994	61.4958	0	0	No Change High Expression	spliced
Arpc4_chr6_113378115_113390448(+)_transcript=ENSMUST00000203578.2	Arpc4	1323	1123.99	42.9898	0	0	No Change High Expression	spliced
Arpc5_chr1_152766542_152775597(+)_transcript=ENSMUST00000077755.10	Arpc5	1914	1714.99	52.3827	0	0	Down	spliced
Arpc5l_chr2_39005348_39015877(+)_transcript=ENSMUST00000112862.6	Arpc5l	1339	1139.99	41.1068	0	0	No Change High Expression	spliced
Arpin_chr7_79925361_79935359(-)_transcript=ENSMUST00000048731.5	Arpin	2277	2077.99	0.952244	0	0	No Change Low Expression	spliced
Arpp19_chr9_75037614_75060313(+)_transcript=ENSMUST00000170308.7	Arpp19	429	229.994	50.1598	0	0	Down	spliced
Arrb1_chr7_99535466_99606771(+)_transcript=ENSMUST00000098266.8	Arrb1	7132	6932.99	6.41851	0	0	No Change Medium Expression	spliced
Arrb2_chr11_70432635_70440828(+)_transcript=ENSMUST00000102564.10	Arrb2	1848	1648.99	15.6702	0	0	No Change Medium Expression	spliced
Arrdc1_chr2_24925352_24935252(-)_transcript=ENSMUST00000028349.13	Arrdc1	1666	1466.99	3.98633	0	-0.0153485	No Change Medium Expression	spliced
Arrdc2_chr8_70835129_70839720(-)_transcript=ENSMUST00000002989.10	Arrdc2	2355	2155.99	3.81218	0	0	No Change Medium Expression	spliced
Arrdc3_chr13_80883384_80896042(+)_transcript=ENSMUST00000099356.9	Arrdc3	4101	3901.99	26.2454	1.10733	0.05568	Down	spliced
Arrdc4_chr7_68736995_68749241(-)_transcript=ENSMUST00000118110.2	Arrdc4	1129	929.994	5.47926	0	0	No Change Medium Expression	spliced
Arsa_chr15_89472476_89477425(-)_transcript=ENSMUST00000165199.7	Arsa	3492	3292.99	4.57856	0	-0.0153485	No Change Medium Expression	spliced
Arsb_chr13_93771630_93943016(+)_transcript=ENSMUST00000091403.5	Arsb	4038	3838.99	0.828089	0.0287928	0.0287928	No Change Low Expression	spliced
Arsg_chr11_109473374_109573330(+)_transcript=ENSMUST00000106697.7	Arsg	3232	3032.99	0.703773	0	0	No Change Low Expression	spliced
Arsi_chr18_60911780_60918561(+)_transcript=ENSMUST00000040359.5	Arsi	2975	2775.99	0.241209	0	0	No Change Low Expression	spliced
Arsk_chr13_76060422_76098660(-)_transcript=ENSMUST00000120573.2	Arsk	3657	3457.99	0.576453	0	-0.0383713	No Change Low Expression	spliced
Art1_chr7_102101743_102113933(+)_transcript=ENSMUST00000033300.3	Art1	1425	1225.99	0.61838	0.112747	0.08205	No Change Low Expression	spliced
Art5_chr7_102096879_102109489(-)_transcript=ENSMUST00000106937.7	Art5	1713	1513.99	0.93568	0	0	No Change Low Expression	spliced
Artn_chr4_117926162_117929763(-)_transcript=ENSMUST00000070816.8	Artn	2177	1977.99	0.389828	0	-0.0460456	No Change Low Expression	spliced
Arv1_chr8_124722139_124734123(+)_transcript=ENSMUST00000034463.3	Arv1	1165	965.994	13.6766	0	0	No Change Medium Expression	spliced
Arvcf_chr16_18348182_18407076(+)_transcript=ENSMUST00000150253.2	Arvcf	4232	4032.99	11.638	0	0	No Change Medium Expression	spliced
Arxes1_chrX_136033367_136034946(+)_transcript=ENSMUST00000057625.2	Arxes1	1580	1380.99	3.37348	0	0	No Change Medium Expression	spliced
Arxes2_chrX_135993824_135995355(+)_transcript=ENSMUST00000058119.8	Arxes2	1532	1332.99	5.95085	0	0	No Change Medium Expression	spliced
As3mt_chr19_46707458_46741099(+)_transcript=ENSMUST00000003655.8	As3mt	1736	1536.99	4.31463	0	0	No Change Medium Expression	spliced
Asah1_chr8_41340197_41374773(-)_transcript=ENSMUST00000034000.14	Asah1	2773	2573.99	48.1614	0.307124	-0.091938	No Change High Expression	spliced
Asap1_chr15_64086857_64382919(-)_transcript=ENSMUST00000110115.8	Asap1	4535	4335.99	4.89732	0	0	No Change Medium Expression	spliced
Asap2_chr12_20990459_21270171(+)_transcript=ENSMUST00000050990.9	Asap2	3345	3145.99	7.79662	2.26472	0.27681	No Change Medium Expression	spliced
Asap3_chr4_136206365_136245216(+)_transcript=ENSMUST00000047526.7	Asap3	4225	4025.99	4.33203	0	0	No Change Medium Expression	spliced
Asb1_chr1_91540544_91559589(+)_transcript=ENSMUST00000027538.8	Asb1	5826	5626.99	3.43355	0	0	No Change Medium Expression	spliced
Asb13_chr13_3634032_3653822(+)_transcript=ENSMUST00000042288.7	Asb13	4453	4253.99	1.47611	0	-0.0538845	No Change Medium Expression	spliced
Asb14_chr14_26894557_26915258(+)_transcript=ENSMUST00000165929.3	Asb14	1815	1615.99	0.272535	0	0	No Change Low Expression	spliced
Asb16_chr11_102268743_102279462(+)_transcript=ENSMUST00000036467.4	Asb16	2843	2643.99	1.64034	0	0	No Change Medium Expression	spliced
Asb2_chr12_103321142_103356001(-)_transcript=ENSMUST00000021617.13	Asb2	2690	2490.99	0.212182	0	0	No Change Low Expression	spliced
Asb3_chr11_30885416_31102704(+)_transcript=ENSMUST00000203878.2	Asb3	1813	1613.99	4.31967	0	0	No Change Medium Expression	spliced
Asb4_chr6_5383386_5433022(+)_transcript=ENSMUST00000043294.11	Asb4	3286	3086.99	0.230754	0	0	No Change Low Expression	spliced
Asb6_chr2_30823097_30830333(-)_transcript=ENSMUST00000041726.3	Asb6	4147	3947.99	4.97469	0	0	No Change Medium Expression	spliced
Asb7_chr7_66644565_66689596(-)_transcript=ENSMUST00000124899.7	Asb7	4928	4728.99	5.27515	0	0	Down	spliced
Asb8_chr15_98134637_98165625(-)_transcript=ENSMUST00000143400.7	Asb8	2226	2026.99	11.2621	0	0	No Change Medium Expression	spliced
Ascc1_chr10_60002805_60099988(+)_transcript=ENSMUST00000164083.3	Ascc1	1473	1273.99	21.7767	3.30349e-10	-1.24259e-08	No Change High Expression	spliced
Ascc2_chr11_4637747_4685699(+)_transcript=ENSMUST00000070257.13	Ascc2	2650	2450.99	14.8226	0.115171	0.0537769	Up	spliced
Ascc3_chr10_50592669_50851485(+)_transcript=ENSMUST00000035606.9	Ascc3	7760	7560.99	24.5275	0.554301	0.125247	No Change High Expression	spliced
Ascl2_chr7_142966829_142969264(-)_transcript=ENSMUST00000009392.5	Ascl2	1605	1405.99	8.68698	0	0	No Change Medium Expression	spliced
Asf1a_chr10_53596757_53609225(+)_transcript=ENSMUST00000219271.1	Asf1a	725	525.994	32.1225	0	0	No Change High Expression	spliced
Asf1b_chr8_83955507_83970197(+)_transcript=ENSMUST00000005607.8	Asf1b	1788	1588.99	19.8191	0.0995128	-0.146063	No Change High Expression	spliced
Ash1l_chr3_88950622_89079375(+)_transcript=ENSMUST00000090933.4	Ash1l	11268	11069	10.4374	13.0875	6.63968	No Change Medium Expression	spliced
Ash2l_chr8_25815996_25847694(-)_transcript=ENSMUST00000110610.7	Ash2l	2337	2137.99	161.433	0	0	No Change High Expression	spliced
Asic1_chr15_99670368_99701130(+)_transcript=ENSMUST00000023758.8	Asic1	4114	3914.99	2.34287	0.0191952	0.0191952	No Change Medium Expression	spliced
Asic2_chr11_80880169_81968457(-)_transcript=ENSMUST00000066197.6	Asic2	2700	2500.99	0.148603	0	0	No Change Low Expression	spliced
Asic3_chr5_24413392_24417835(+)_transcript=ENSMUST00000049346.9	Asic3	1853	1653.99	0.171323	0	0	No Change Low Expression	spliced
Asl_chr5_130011258_130029247(-)_transcript=ENSMUST00000161094.7	Asl	1824	1624.99	10.4108	0	0	No Change Medium Expression	spliced
Asna1_chr8_85017931_85025281(-)_transcript=ENSMUST00000064314.9	Asna1	1256	1056.99	155.6	0.00959761	-0.00575089	No Change High Expression	spliced
Asns_chr6_7675169_7693254(-)_transcript=ENSMUST00000031766.11	Asns	2001	1801.99	124.132	0	0	No Change High Expression	spliced
Asnsd1_chr1_53344617_53352752(-)_transcript=ENSMUST00000027264.9	Asnsd1	2442	2242.99	29.8782	0	0	No Change High Expression	spliced
Aspg_chr12_112106679_112127559(+)_transcript=ENSMUST00000079400.5	Aspg	2722	2522.99	1.84052	0	0	No Change Medium Expression	spliced
Asph_chr4_9448069_9669344(-)_transcript=ENSMUST00000108334.7	Asph	2685	2485.99	11.2377	0.0245914	0.0245914	No Change Medium Expression	spliced
Asphd1_chr7_126945567_126949582(-)_transcript=ENSMUST00000106340.7	Asphd1	1647	1447.99	0.410255	0	0	No Change Low Expression	spliced
Asphd2_chr5_112384354_112394866(-)_transcript=ENSMUST00000031291.8	Asphd2	2678	2478.99	2.07777	0	0	No Change Medium Expression	spliced
Aspm_chr1_139454772_139494091(+)_transcript=ENSMUST00000053364.11	Aspm	9867	9667.99	27.7993	0	0	No Change High Expression	spliced
Aspscr1_chr11_120672973_120709447(+)_transcript=ENSMUST00000026135.14	Aspscr1	1820	1620.99	31.2846	0	0	Up	spliced
Asrgl1_chr19_9109868_9135636(-)_transcript=ENSMUST00000049948.5	Asrgl1	4195	3995.99	6.6365	0.194546	-0.105203	No Change Medium Expression	spliced
Ass1_chr2_31470207_31520672(+)_transcript=ENSMUST00000102840.4	Ass1	1696	1496.99	172.076	0	0	No Change High Expression	spliced
Aste1_chr9_105395392_105412229(+)_transcript=ENSMUST00000123807.7	Aste1	2349	2149.99	2.50159	4.59091	3.52106	No Change Medium Expression	spliced
Astn1_chr1_158362273_158691781(+)_transcript=ENSMUST00000194369.5	Astn1	3344	3144.99	0.20857	0	0	No Change Low Expression	spliced
Asxl1_chr2_153345829_153404007(+)_transcript=ENSMUST00000109790.1	Asxl1	6968	6768.99	48.4239	0	0	No Change High Expression	spliced
Asxl2_chr12_3426857_3506852(+)_transcript=ENSMUST00000153102.8	Asxl2	4462	4262.99	21.1185	36.0273	18.5851	No Change High Expression	spliced
Asxl3_chr18_22344246_22530227(+)_transcript=ENSMUST00000120223.7	Asxl3	11485	11286	1.95995	3.76262e-07	-6.11079e-06	No Change Medium Expression	spliced
Atad1_chr19_32671638_32739786(-)_transcript=ENSMUST00000070210.5	Atad1	2666	2466.99	30.7894	0	0	No Change High Expression	spliced
Atad2_chr15_58094044_58135082(-)_transcript=ENSMUST00000038194.4	Atad2	5684	5484.99	63.0269	3.69974	1.92011	No Change High Expression	spliced
Atad2b_chr12_4917353_5047394(+)_transcript=ENSMUST00000045664.6	Atad2b	8035	7835.99	19.9382	4.64607	1.851	No Change High Expression	spliced
Atad3a_chr4_155740641_155761093(-)_transcript=ENSMUST00000030903.11	Atad3a	2413	2213.99	56.5014	0.00959761	0.00959761	No Change High Expression	spliced
Atad3aos_chr4_155761178_155769264(+)_transcript=ENSMUST00000067628.1	Atad3aos	971	771.994	0.824103	0	0	No Change Low Expression	spliced
Atad5_chr11_80089400_80135794(+)_transcript=ENSMUST00000017694.6	Atad5	7272	7072.99	23.5069	0.776245	0.352363	No Change High Expression	spliced
Atat1_chr17_35897595_35910075(-)_transcript=ENSMUST00000056034.12	Atat1	1930	1730.99	2.24627	0	0	No Change Medium Expression	spliced
Atcay_chr10_81204508_81230833(-)_transcript=ENSMUST00000047408.5	Atcay	3736	3536.99	1.56078	0	0	No Change Medium Expression	spliced
Atcayos_chr10_81194609_81210877(+)_transcript=ENSMUST00000129834.1	Atcayos	1350	1150.99	0.13894	0	0	No Change Low Expression	spliced
Ate1_chr7_130391493_130520369(-)_transcript=ENSMUST00000178534.7	Ate1	1530	1330.99	8.87717	0	0	No Change Medium Expression	spliced
Atf1_chr15_100227819_100261244(+)_transcript=ENSMUST00000023769.10	Atf1	2365	2165.99	45.2632	0.00892821	0.00892821	No Change High Expression	spliced
Atf2_chr2_73816509_73892639(-)_transcript=ENSMUST00000112017.7	Atf2	2396	2196.99	16.8215	0	0	No Change High Expression	spliced
Atf3_chr1_191170296_191218039(-)_transcript=ENSMUST00000027941.13	Atf3	1984	1784.99	3.18422	0	0	No Change Medium Expression	spliced
Atf4_chr15_80255184_80257541(+)_transcript=ENSMUST00000109605.4	Atf4	1725	1525.99	254.001	0.00959761	0.00959761	No Change High Expression	spliced
Atf5_chr7_44812256_44816658(-)_transcript=ENSMUST00000047356.10	Atf5	1816	1616.99	7.86036	0	0	No Change Medium Expression	spliced
Atf6_chr1_170704674_170867771(-)_transcript=ENSMUST00000027974.6	Atf6	7246	7046.99	11.7435	0.758132	-0.113224	No Change Medium Expression	spliced
Atf6b_chr17_34647146_34655074(+)_transcript=ENSMUST00000015605.14	Atf6b	2566	2366.99	17.8453	0	0	No Change High Expression	spliced
Atf7_chr15_102525946_102625464(-)_transcript=ENSMUST00000184616.7	Atf7	7147	6947.99	8.0473	0	0	No Change Medium Expression	spliced
Atf7ip_chr6_136506167_136610862(+)_transcript=ENSMUST00000032335.12	Atf7ip	8059	7859.99	30.0626	1.47282	-0.02429	No Change High Expression	spliced
Atf7ip2_chr16_10192712_10251478(+)_transcript=ENSMUST00000044005.13	Atf7ip2	2778	2578.99	8.59022	4.91485	3.23832	No Change Medium Expression	spliced
Atg10_chr13_90935356_91223968(-)_transcript=ENSMUST00000022119.5	Atg10	1583	1383.99	1.23171	0.00959761	-0.0210994	No Change Medium Expression	spliced
Atg101_chr15_101284272_101290945(+)_transcript=ENSMUST00000048393.7	Atg101	1270	1070.99	18.8066	0	0	No Change High Expression	spliced
Atg12_chr18_46730144_46741580(-)_transcript=ENSMUST00000035648.5	Atg12	4765	4565.99	8.16566	0	0	No Change Medium Expression	spliced
Atg13_chr2_91674618_91710576(-)_transcript=ENSMUST00000076803.11	Atg13	3551	3351.99	18.2485	0	0	No Change High Expression	spliced
Atg14_chr14_47540893_47570649(-)_transcript=ENSMUST00000042988.6	Atg14	3450	3250.99	12.4814	0	0	No Change Medium Expression	spliced
Atg16l1_chr1_87755870_87792428(+)_transcript=ENSMUST00000113186.7	Atg16l1	3004	2804.99	18.6334	1.9554	-0.19144	No Change High Expression	spliced
Atg16l2_chr7_101263034_101302251(-)_transcript=ENSMUST00000122116.7	Atg16l2	2083	1883.99	3.28761	0	0	No Change Medium Expression	spliced
Atg2a_chr19_6241668_6262335(+)_transcript=ENSMUST00000045351.12	Atg2a	6371	6171.99	13.4371	0	0	No Change Medium Expression	spliced
Atg2b_chr12_105616136_105685211(-)_transcript=ENSMUST00000041055.8	Atg2b	7546	7346.99	17.8954	0.15833	-0.192686	No Change High Expression	spliced
Atg3_chr16_45158785_45188538(+)_transcript=ENSMUST00000023343.3	Atg3	2057	1857.99	15.7495	0.20155	0.140156	No Change Medium Expression	spliced
Atg4a_chrX_140956907_141164270(+)_transcript=ENSMUST00000112971.1	Atg4a	2202	2002.99	2.45643	0	0	No Change Medium Expression	spliced
Atg4b_chr1_93751500_93790610(+)_transcript=ENSMUST00000027502.15	Atg4b	4173	3973.99	12.0188	0	0	No Change Medium Expression	spliced
Atg4c_chr4_99193934_99259787(+)_transcript=ENSMUST00000180278.1	Atg4c	2792	2592.99	4.2568	0	0	No Change Medium Expression	spliced
Atg4d_chr9_21265293_21277772(+)_transcript=ENSMUST00000065005.4	Atg4d	5951	5751.99	5.60447	0	0	No Change Medium Expression	spliced
Atg5_chr10_44268358_44364291(+)_transcript=ENSMUST00000039286.4	Atg5	2352	2152.99	18.1864	0.257131	-0.018321	No Change High Expression	spliced
Atg7_chr6_114643097_114860614(+)_transcript=ENSMUST00000182793.7	Atg7	2459	2259.99	4.57806	0	0	No Change Medium Expression	spliced
Atg9a_chr1_75180860_75192196(-)_transcript=ENSMUST00000040689.14	Atg9a	3764	3564.99	3.92602	0	0	No Change Medium Expression	spliced
Atg9b_chr5_24384181_24392143(-)_transcript=ENSMUST00000059401.6	Atg9b	3902	3702.99	2.95268	0	0	No Change Medium Expression	spliced
Atic_chr1_71557150_71579631(+)_transcript=ENSMUST00000027384.5	Atic	2845	2645.99	76.0458	0	0	No Change High Expression	spliced
Atl1_chr12_69892614_69966417(+)_transcript=ENSMUST00000021466.9	Atl1	5150	4950.99	0.731498	0	0	No Change Low Expression	spliced
Atl2_chr17_79848390_79896123(-)_transcript=ENSMUST00000068282.6	Atl2	3618	3418.99	31.6225	0	0	No Change High Expression	spliced
Atl3_chr19_7494040_7539674(+)_transcript=ENSMUST00000170373.8	Atl3	7540	7340.99	19.4607	0	0	No Change High Expression	spliced
Atm_chr9_53439149_53536740(-)_transcript=ENSMUST00000232179.1	Atm	9787	9587.99	15.2812	0.12605	-0.04754	No Change Medium Expression	spliced
Atmin_chr8_116943393_116960445(+)_transcript=ENSMUST00000109099.3	Atmin	4877	4677.99	35.434	0.783828	-0.982402	No Change High Expression	spliced
Atn1_chr6_124742544_124756524(-)_transcript=ENSMUST00000088357.11	Atn1	4433	4233.99	9.88151	0	0	No Change Medium Expression	spliced
Atox1_chr11_55446641_55461239(-)_transcript=ENSMUST00000108857.1	Atox1	541	341.994	62.3737	0	0	No Change High Expression	spliced
Atp10a_chr7_58656166_58829420(+)_transcript=ENSMUST00000168747.2	Atp10a	5419	5219.99	12.7868	1.31493	-0.58133	No Change Medium Expression	spliced
Atp10d_chr5_72203329_72298775(+)_transcript=ENSMUST00000126664.7	Atp10d	6052	5852.99	5.15401	0.113569	0.0161079	No Change Medium Expression	spliced
Atp11a_chr8_12757014_12868728(+)_transcript=ENSMUST00000091237.11	Atp11a	7443	7243.99	4.87253	0.00959761	-0.0517965	No Change Medium Expression	spliced
Atp11b_chr3_35754106_35856276(+)_transcript=ENSMUST00000029257.14	Atp11b	4868	4668.99	34.1977	1.44493	-1.03918	No Change High Expression	spliced
Atp11c_chrX_60223290_60592698(-)_transcript=ENSMUST00000101527.2	Atp11c	6044	5844.99	6.64382	1.72161e-10	-5.5512e-09	No Change Medium Expression	spliced
Atp13a1_chr8_69791163_69807749(+)_transcript=ENSMUST00000034326.6	Atp13a1	3915	3715.99	41.5227	0	0	No Change High Expression	spliced
Atp13a2_chr4_140986873_141007330(+)_transcript=ENSMUST00000127833.2	Atp13a2	3882	3682.99	4.72898	0	0	No Change Medium Expression	spliced
Atp13a3_chr16_30312423_30405975(-)_transcript=ENSMUST00000061350.12	Atp13a3	7220	7020.99	35.694	0	0	No Change High Expression	spliced
Atp1a1_chr3_101576219_101604684(-)_transcript=ENSMUST00000036493.7	Atp1a1	3679	3479.99	133.83	0.220745	-0.669469	No Change High Expression	spliced
Atp1a2_chr1_172271709_172298064(-)_transcript=ENSMUST00000085913.10	Atp1a2	6227	6027.99	2.40737	0	0	No Change Medium Expression	spliced
Atp1a3_chr7_24978167_25005958(-)_transcript=ENSMUST00000080882.10	Atp1a3	3621	3421.99	7.99327	0	0	Up	spliced
Atp1a4_chr1_172223513_172258414(-)_transcript=ENSMUST00000111243.1	Atp1a4	3470	3270.99	1.01836	0	0	No Change Medium Expression	spliced
Atp1b1_chr1_164437109_164458355(-)_transcript=ENSMUST00000027863.12	Atp1b1	2580	2380.99	30.6054	0	0	No Change High Expression	spliced
Atp1b2_chr11_69599736_69605942(-)_transcript=ENSMUST00000047889.12	Atp1b2	2842	2642.99	10.1292	0	0	Up	spliced
Atp1b3_chr9_96332655_96364442(-)_transcript=ENSMUST00000034983.6	Atp1b3	1994	1794.99	57.6813	0.430075	0.070519	No Change High Expression	spliced
Atp23_chr10_126868427_126901355(-)_transcript=ENSMUST00000168520.2	Atp23	1043	843.994	7.69155	0	0	No Change Medium Expression	spliced
Atp2a1_chr7_126445858_126463108(-)_transcript=ENSMUST00000032974.12	Atp2a1	3477	3277.99	0.203884	0	0	No Change Low Expression	spliced
Atp2a2_chr5_122453513_122502225(-)_transcript=ENSMUST00000031423.9	Atp2a2	4486	4286.99	106.196	0	0	No Change High Expression	spliced
Atp2a3_chr11_72961169_72993044(+)_transcript=ENSMUST00000021142.7	Atp2a3	4593	4393.99	2.15184	0	0	No Change Medium Expression	spliced
Atp2b1_chr10_98914406_99026143(+)_transcript=ENSMUST00000020107.7	Atp2b1	7130	6930.99	21.5475	0.983198	0.395532	No Change High Expression	spliced
Atp2b2_chr6_113743831_114042613(-)_transcript=ENSMUST00000089003.11	Atp2b2	7067	6867.99	0.25699	0	0	No Change Low Expression	spliced
Atp2b4_chr1_133699457_133801041(-)_transcript=ENSMUST00000165602.8	Atp2b4	8101	7901.99	2.89775	0	0	No Change Medium Expression	spliced
Atp2c1_chr9_105403539_105527319(-)_transcript=ENSMUST00000177074.7	Atp2c1	2664	2464.99	15.2243	0	0	No Change Medium Expression	spliced
Atp2c2_chr8_119700009_119757717(+)_transcript=ENSMUST00000095171.4	Atp2c2	3222	3022.99	0.831536	0	0	No Change Low Expression	spliced
Atp4a_chr7_30712209_30725534(+)_transcript=ENSMUST00000170371.1	Atp4a	3447	3247.99	0.473945	0	0	No Change Low Expression	spliced
Atp5a1_chr18_77773729_77782869(+)_transcript=ENSMUST00000026495.14	Atp5a1	2471	2271.99	376.847	0	-0.0613941	No Change High Expression	spliced
Atp5b_chr10_128083273_128090391(+)_transcript=ENSMUST00000026459.5	Atp5b	1916	1716.99	864.095	0.680354	-0.580986	No Change High Expression	spliced
Atp5c1_chr2_10056016_10080510(-)_transcript=ENSMUST00000114897.8	Atp5c1	1166	966.994	177.487	0	0	No Change High Expression	spliced
Atp5d_chr10_80138632_80145818(+)_transcript=ENSMUST00000003156.14	Atp5d	931	731.994	87.7997	0	0	No Change High Expression	spliced
Atp5e_chr2_174461072_174464105(-)_transcript=ENSMUST00000016396.7	Atp5e	421	221.995	136.249	0	0	No Change High Expression	spliced
Atp5g1_chr11_96068852_96075670(-)_transcript=ENSMUST00000107684.1	Atp5g1	596	396.994	186.876	0.0191952	0.0191952	No Change High Expression	spliced
Atp5g2_chr15_102662864_102672352(-)_transcript=ENSMUST00000185641.6	Atp5g2	731	531.994	144.201	0	0	No Change High Expression	spliced
Atp5g3_chr2_73908447_73911326(-)_transcript=ENSMUST00000018914.2	Atp5g3	714	514.994	185.926	0	0	No Change High Expression	spliced
Atp5h_chr11_115415689_115419962(-)_transcript=ENSMUST00000043931.8	Atp5h	625	425.994	189.626	0	0	No Change High Expression	spliced
Atp5j_chr16_84827866_84835625(-)_transcript=ENSMUST00000114193.7	Atp5j	680	480.994	199.221	0	0	No Change High Expression	spliced
Atp5j2_chr5_145183698_145192062(-)_transcript=ENSMUST00000037056.8	Atp5j2	540	340.994	202.475	0.0109974	-0.0196996	No Change High Expression	spliced
Atp5k_chr5_108433244_108434448(-)_transcript=ENSMUST00000049628.15	Atp5k	371	172.049	127.811	0	0	No Change High Expression	spliced
Atp5l_chr9_44912557_44920742(-)_transcript=ENSMUST00000043675.8	Atp5l	544	344.994	221.306	0	0	No Change High Expression	spliced
Atp5md_chr19_47083464_47090647(-)_transcript=ENSMUST00000096014.4	Atp5md	362	163.095	179.866	0	0	No Change High Expression	spliced
Atp5mpl_chr12_111961375_111966977(-)_transcript=ENSMUST00000021719.6	Atp5mpl	366	167.072	181.346	0	0	No Change High Expression	spliced
Atp5o_chr16_91925214_91931687(-)_transcript=ENSMUST00000023677.9	Atp5o	838	638.994	179.47	0	0	No Change High Expression	spliced
Atp5pb_chr3_105942698_105960099(-)_transcript=ENSMUST00000118209.7	Atp5pb	1604	1404.99	144.367	0	0	No Change High Expression	spliced
Atp5pb-ps_chr11_55118101_55118795(-)_transcript=ENSMUST00000119447.1	Atp5pb-ps	695	495.994	6.00911	0	0	No Change Medium Expression	spliced
Atp6ap1_chrX_74297097_74304721(+)_transcript=ENSMUST00000019231.11	Atp6ap1	2189	1989.99	22.9249	0	0	No Change High Expression	spliced
Atp6ap2_chrX_12587801_12617049(+)_transcript=ENSMUST00000033313.2	Atp6ap2	2324	2124.99	21.4433	0	-0.0153485	No Change High Expression	spliced
Atp6v0a1_chr11_101009452_101063719(+)_transcript=ENSMUST00000044721.12	Atp6v0a1	4008	3808.99	5.26162	0	0	No Change Medium Expression	spliced
Atp6v0a2_chr5_124628576_124724455(+)_transcript=ENSMUST00000037865.12	Atp6v0a2	5345	5145.99	8.80562	0	0	No Change Medium Expression	spliced
Atp6v0a4_chr6_38048483_38124586(-)_transcript=ENSMUST00000114908.4	Atp6v0a4	3307	3107.99	1.26067	0	0	Up	spliced
Atp6v0b_chr4_117884326_117887333(-)_transcript=ENSMUST00000036380.13	Atp6v0b	1000	800.994	43.7295	0	0	No Change High Expression	spliced
Atp6v0c_chr17_24163866_24169702(-)_transcript=ENSMUST00000024932.11	Atp6v0c	1183	983.994	127.929	0	0	No Change High Expression	spliced
Atp6v0c-ps1_chr7_4412438_4412900(+)_transcript=ENSMUST00000206596.1	Atp6v0c-ps1	463	263.994	0.17799	0	0	No Change Low Expression	spliced
Atp6v0d1_chr8_105524465_105566047(-)_transcript=ENSMUST00000013304.7	Atp6v0d1	1629	1429.99	66.6692	0	0	No Change High Expression	spliced
Atp6v0e_chr17_26663231_26699647(+)_transcript=ENSMUST00000236867.1	Atp6v0e	772	572.994	43.739	0	0	No Change High Expression	spliced
Atp6v0e2_chr6_48537615_48541801(+)_transcript=ENSMUST00000203011.1	Atp6v0e2	1612	1412.99	1.58487	0	0	No Change Medium Expression	spliced
Atp6v1a_chr16_44085402_44139705(-)_transcript=ENSMUST00000114666.8	Atp6v1a	4234	4034.99	22.4468	0	0	No Change High Expression	spliced
Atp6v1b2_chr8_69088646_69113711(+)_transcript=ENSMUST00000006435.7	Atp6v1b2	2825	2625.99	78.8381	0	0	No Change High Expression	spliced
Atp6v1c1_chr15_38661933_38692446(+)_transcript=ENSMUST00000022904.7	Atp6v1c1	2071	1871.99	33.4551	0	0	No Change High Expression	spliced
Atp6v1d_chr12_78840725_78861638(-)_transcript=ENSMUST00000021536.8	Atp6v1d	3667	3467.99	18.0846	0	0	No Change High Expression	spliced
Atp6v1e1_chr6_120794305_120822793(-)_transcript=ENSMUST00000019354.10	Atp6v1e1	1312	1112.99	46.1643	0	0	No Change High Expression	spliced
Atp6v1f_chr6_29467718_29470512(+)_transcript=ENSMUST00000004396.12	Atp6v1f	703	503.994	36.3583	0	0	No Change High Expression	spliced
Atp6v1fnb_chr6_29471437_29473465(+)_transcript=ENSMUST00000171317.1	Atp6v1fnb	682	482.994	0.207035	0.211147	0.195799	No Change Low Expression	spliced
Atp6v1g1_chr4_63544772_63550750(+)_transcript=ENSMUST00000035301.6	Atp6v1g1	1135	935.994	66.7552	0	0	No Change High Expression	spliced
Atp6v1g2_chr17_35233660_35238767(+)_transcript=ENSMUST00000068261.8	Atp6v1g2	1528	1328.99	0.477387	0	0	No Change Low Expression	spliced
Atp6v1h_chr1_5070018_5162529(+)_transcript=ENSMUST00000044369.12	Atp6v1h	2049	1849.99	18.9083	0	0	No Change High Expression	spliced
Atp7a_chrX_106027276_106124926(+)_transcript=ENSMUST00000113557.7	Atp7a	4900	4700.99	6.00762	3.71122e-06	-0.000163246	No Change Medium Expression	spliced
Atp7b_chr8_21992785_22060305(-)_transcript=ENSMUST00000006742.10	Atp7b	6505	6305.99	1.86192	0	0	No Change Medium Expression	spliced
Atp8a1_chr5_67618140_67847434(-)_transcript=ENSMUST00000072971.12	Atp8a1	7154	6954.99	5.27572	0.53055	-0.114088	No Change Medium Expression	spliced
Atp8a2_chr14_59638540_60197179(-)_transcript=ENSMUST00000080368.12	Atp8a2	12886	12687	0.265209	0.222655	0.130564	No Change Low Expression	spliced
Atp8b1_chr18_64528967_64661267(-)_transcript=ENSMUST00000025482.9	Atp8b1	6719	6519.99	0.210271	0	0	No Change Low Expression	spliced
Atp8b2_chr3_89939481_89963508(-)_transcript=ENSMUST00000069805.13	Atp8b2	5559	5359.99	19.2092	0	0	No Change High Expression	spliced
Atp8b3_chr10_80519584_80539124(-)_transcript=ENSMUST00000020383.5	Atp8b3	4412	4212.99	0.556242	0	0	No Change Low Expression	spliced
Atp9a_chr2_168634438_168742409(-)_transcript=ENSMUST00000109175.8	Atp9a	3729	3529.99	5.78696	0.0191952	0.0191952	No Change Medium Expression	spliced
Atp9b_chr18_80734141_80934060(-)_transcript=ENSMUST00000225980.1	Atp9b	5150	4950.99	10.234	0.0959761	-0.0528889	No Change Medium Expression	spliced
Atpaf1_chr4_115784812_115822655(+)_transcript=ENSMUST00000239030.1	Atpaf1	2160	1960.99	9.70597	0	0	No Change Medium Expression	spliced
Atpaf2_chr11_60400626_60418457(-)_transcript=ENSMUST00000108721.8	Atpaf2	1813	1613.99	13.4332	0	0	No Change Medium Expression	spliced
Atpif1_chr4_132530555_132533659(-)_transcript=ENSMUST00000152993.7	Atpif1	462	262.994	274.961	0.105574	0.105574	No Change High Expression	spliced
Atpsckmt_chr15_31601852_31621227(+)_transcript=ENSMUST00000042702.6	Atpsckmt	1164	964.994	2.47109	2.34486	1.63253	No Change Medium Expression	spliced
Atr_chr9_95857597_95951781(+)_transcript=ENSMUST00000034980.8	Atr	8056	7856.99	20.7463	0	0	No Change High Expression	spliced
Atraid_chr5_31048312_31054623(+)_transcript=ENSMUST00000013766.12	Atraid	966	766.994	10.7539	0	0	No Change Medium Expression	spliced
Atrip_chr9_109057933_109074124(-)_transcript=ENSMUST00000045011.8	Atrip	2572	2372.99	6.62521	0.61215	0.058624	No Change Medium Expression	spliced
Atrn_chr2_130906495_131030333(+)_transcript=ENSMUST00000028781.8	Atrn	8745	8545.99	4.74732	4.02996	2.30921	No Change Medium Expression	spliced
Atrnl1_chr19_57611034_58133343(+)_transcript=ENSMUST00000077282.6	Atrnl1	6586	6386.99	5.61541	1.26602	0.677447	Down	spliced
Atrx_chrX_105797615_105929403(-)_transcript=ENSMUST00000113573.7	Atrx	10275	10076	125.495	0	0	No Change High Expression	spliced
Atxn1_chr13_45549755_45965008(-)_transcript=ENSMUST00000091628.10	Atxn1	10569	10370	0.587359	0.305586	0.265131	No Change Low Expression	spliced
Atxn10_chr15_85336245_85463212(+)_transcript=ENSMUST00000163242.2	Atxn10	1937	1737.99	170.214	0.0184894	0.0184894	No Change High Expression	spliced
Atxn1l_chr8_109726451_109737739(-)_transcript=ENSMUST00000212605.1	Atxn1l	7439	7239.99	11.0547	0	0	No Change Medium Expression	spliced
Atxn2_chr5_121711337_121816493(+)_transcript=ENSMUST00000051950.13	Atxn2	4472	4272.99	43.4622	0	-0.0153485	No Change High Expression	spliced
Atxn2l_chr7_126491708_126503437(-)_transcript=ENSMUST00000040202.14	Atxn2l	3853	3653.99	41.7806	0	-0.0153482	No Change High Expression	spliced
Atxn3_chr12_101918901_101958246(-)_transcript=ENSMUST00000021606.11	Atxn3	5363	5163.99	11.9456	0.0575857	-0.0345054	No Change Medium Expression	spliced
Atxn7_chr14_13961440_14107302(+)_transcript=ENSMUST00000022257.3	Atxn7	6853	6653.99	3.7315	0	0	No Change Medium Expression	spliced
Atxn7l1_chr12_33147693_33373185(+)_transcript=ENSMUST00000110824.8	Atxn7l1	1675	1475.99	4.69073	1.47081	1.02661	No Change Medium Expression	spliced
Atxn7l2_chr3_108202222_108210934(-)_transcript=ENSMUST00000117409.7	Atxn7l2	2321	2121.99	2.3385	0	0	No Change Medium Expression	spliced
Atxn7l3_chr11_102289300_102296631(-)_transcript=ENSMUST00000073234.8	Atxn7l3	3688	3488.99	37.5073	0.0191446	0.0191446	No Change High Expression	spliced
Atxn7l3b_chr10_112925430_112929001(-)_transcript=ENSMUST00000099276.3	Atxn7l3b	3566	3366.99	16.2903	0	0	No Change High Expression	spliced
AU015836_chrX_93968659_93975470(+)_transcript=ENSMUST00000121565.7	AU015836	2997	2797.99	16.6542	0	0	No Change High Expression	spliced
AU018091_chr7_3154658_3169203(-)_transcript=ENSMUST00000171749.2	AU018091	3449	3249.99	62.1501	0	0	No Change High Expression	spliced
AU020206_chr7_75769038_75782099(-)_transcript=ENSMUST00000206358.1	AU020206	3009	2809.99	17.25	0	0	No Change High Expression	spliced
AU022252_chr4_119203570_119232712(-)_transcript=ENSMUST00000141112.1	AU022252	7151	6951.99	6.70162	0	-0.0153487	No Change Medium Expression	spliced
AU022751_chrX_6081219_6083419(-)_transcript=ENSMUST00000117544.1	AU022751	2201	2001.99	0.541309	0	0	No Change Low Expression	spliced
AU040320_chr4_126753544_126870070(+)_transcript=ENSMUST00000047431.10	AU040320	4384	4184.99	3.21291	0	0	No Change Medium Expression	spliced
AU041133_chr10_82128013_82153065(+)_transcript=ENSMUST00000201286.3	AU041133	2634	2434.99	6.16295	2.56202	1.68715	No Change Medium Expression	spliced
Auh_chr13_52835119_52929681(-)_transcript=ENSMUST00000021913.15	Auh	1320	1120.99	8.64974	0.489035	-0.242898	No Change Medium Expression	spliced
Aunip_chr4_134510999_134523927(+)_transcript=ENSMUST00000105866.2	Aunip	1275	1075.99	22.7563	10.8569	5.33263	No Change High Expression	spliced
Aup1_chr6_83054521_83057808(+)_transcript=ENSMUST00000092618.8	Aup1	1769	1569.99	19.4637	0	0	No Change High Expression	spliced
Aurka_chr2_172356190_172370535(-)_transcript=ENSMUST00000109140.9	Aurka	1862	1662.99	61.044	0	0	No Change High Expression	spliced
Aurkaip1_chr4_155831272_155833130(+)_transcript=ENSMUST00000105592.7	Aurkaip1	1029	829.994	43.7096	0	0	No Change High Expression	spliced
Aurkb_chr11_69045647_69051664(+)_transcript=ENSMUST00000108666.7	Aurkb	1831	1631.99	35.1956	0	0	Up	spliced
Aurkc_chr7_6995300_7003091(+)_transcript=ENSMUST00000086248.6	Aurkc	1154	954.994	0.810478	0	0	No Change Low Expression	spliced
Auts2_chr5_131437333_132543344(-)_transcript=ENSMUST00000178555.1	Auts2	309	111.833	19.3949	2.97926	2.10622	No Change High Expression	spliced
AV356131_chr7_116443575_116444324(+)_transcript=ENSMUST00000206201.1	AV356131	750	550.994	0.676534	0	0	No Change Low Expression	spliced
Aven_chr2_112492964_112634573(+)_transcript=ENSMUST00000099588.3	Aven	791	591.994	20.3854	0.0157601	-0.113266	No Change High Expression	spliced
Avil_chr10_127000709_127020994(+)_transcript=ENSMUST00000026500.11	Avil	3033	2833.99	0.126665	0	0	No Change Low Expression	spliced
Avl9_chr6_56714899_56761912(+)_transcript=ENSMUST00000031805.10	Avl9	6670	6470.99	7.49778	0.0361149	-0.0417523	No Change Medium Expression	spliced
Avpi1_chr19_42123273_42129059(-)_transcript=ENSMUST00000018965.3	Avpi1	1044	844.994	43.8171	0	0	No Change High Expression	spliced
AW146154_chr7_41478874_41499890(-)_transcript=ENSMUST00000098509.4	AW146154	3411	3211.99	2.14969	2.70727	2.14317	Down	spliced
AW209491_chr13_14630154_14639096(+)_transcript=ENSMUST00000178289.2	AW209491	2035	1835.99	11.5746	22.9917	17.0737	No Change Medium Expression	spliced
AW549877_chr15_3982035_3995744(-)_transcript=ENSMUST00000046633.9	AW549877	5076	4876.99	25.763	0	0	No Change High Expression	spliced
AW551984_chr9_39587396_39604403(-)_transcript=ENSMUST00000119722.7	AW551984	4224	4024.99	1.70329	0	0	No Change Medium Expression	spliced
AW554918_chr18_25168999_25467321(+)_transcript=ENSMUST00000097643.9	AW554918	5351	5151.99	3.65091	3.61977	1.80405	No Change Medium Expression	spliced
AW822073_chr10_58222972_58224930(-)_transcript=ENSMUST00000075305.1	AW822073	555	355.994	0.259458	0	0	No Change Low Expression	spliced
Awat2_chrX_100402221_100442717(-)_transcript=ENSMUST00000147103.1	Awat2	1984	1784.99	0.891744	0.167284	0.167284	No Change Low Expression	spliced
Axdnd1_chr1_156323509_156421159(-)_transcript=ENSMUST00000213088.1	Axdnd1	3561	3361.99	0.146903	0	0	No Change Low Expression	spliced
Axin1_chr17_26138688_26195811(+)_transcript=ENSMUST00000118904.8	Axin1	2833	2633.99	17.4447	0	0	No Change High Expression	spliced
Axin2_chr11_108920349_108950783(+)_transcript=ENSMUST00000052915.13	Axin2	4260	4060.99	4.7487	2.7681	1.09688	No Change Medium Expression	spliced
Axl_chr7_25757273_25788705(-)_transcript=ENSMUST00000002677.10	Axl	4265	4065.99	3.87402	0	0	No Change Medium Expression	spliced
Azi2_chr9_118040499_118069794(+)_transcript=ENSMUST00000044454.11	Azi2	3396	3196.99	10.1896	0	0	No Change Medium Expression	spliced
Azin1_chr15_38487427_38519266(-)_transcript=ENSMUST00000110329.7	Azin1	4217	4017.99	43.9607	0	0	No Change High Expression	spliced
Azin2_chr4_128930233_128962442(-)_transcript=ENSMUST00000106068.7	Azin2	2049	1849.99	1.58077	0	0	No Change Medium Expression	spliced
B020010K11Rik_chr18_82336250_82361600(-)_transcript=ENSMUST00000235445.1	B020010K11Rik	3579	3379.99	3.70707	0	0	No Change Medium Expression	spliced
B130021K23Rik_chr6_87830274_87832866(-)_transcript=ENSMUST00000205226.1	B130021K23Rik	2593	2393.99	0.392142	0	0	No Change Low Expression	spliced
B130055M24Rik_chr7_127448636_127460360(+)_transcript=ENSMUST00000144796.1	B130055M24Rik	1778	1578.99	1.14876	12.7198	9.73025	No Change Medium Expression	spliced
B230118H07Rik_chr2_101560781_101649532(-)_transcript=ENSMUST00000160722.7	B230118H07Rik	931	731.994	10.0013	0	0	No Change Medium Expression	spliced
B230206L02Rik_chr11_94133485_94155776(+)_transcript=ENSMUST00000132584.7	B230206L02Rik	695	495.994	2.6482	0	-0.00038274	No Change Medium Expression	spliced
B230208H11Rik_chr10_12916648_12923090(-)_transcript=ENSMUST00000180529.1	B230208H11Rik	1112	912.994	0.254969	0	0	No Change Low Expression	spliced
B230216N24Rik_chr1_98031116_98057680(-)_transcript=ENSMUST00000159353.1	B230216N24Rik	345	146.283	0.972278	0	0	No Change Low Expression	spliced
B230217C12Rik_chr11_97840780_97844099(+)_transcript=ENSMUST00000170806.1	B230217C12Rik	1118	918.994	2.20073	0	0	No Change Medium Expression	spliced
B230219D22Rik_chr13_55693124_55703500(+)_transcript=ENSMUST00000057844.9	B230219D22Rik	4652	4452.99	17.1627	10.6821	5.4329	Down	spliced
B230303O12Rik_chr5_146188620_146194809(-)_transcript=ENSMUST00000199119.1	B230303O12Rik	3645	3445.99	0.451729	0.374307	0.266867	No Change Low Expression	spliced
B230307C23Rik_chr16_97997315_98031801(+)_transcript=ENSMUST00000232308.1	B230307C23Rik	669	469.994	2.68702	0	0	No Change Medium Expression	spliced
B230311B06Rik_chr7_118592328_118596838(+)_transcript=ENSMUST00000207610.1	B230311B06Rik	687	487.994	1.35445	0	0	No Change Medium Expression	spliced
B230312C02Rik_chr2_180370491_180385885(-)_transcript=ENSMUST00000145549.1	B230312C02Rik	1703	1503.99	0.710895	0	0	No Change Low Expression	spliced
B230317F23Rik_chr8_60983437_60985908(+)_transcript=ENSMUST00000052189.3	B230317F23Rik	2472	2272.99	0.291552	0	0	No Change Low Expression	spliced
B230322F03Rik_chr7_35555367_35556935(+)_transcript=ENSMUST00000181932.1	B230322F03Rik	1569	1369.99	0.181395	0	0	No Change Low Expression	spliced
B230354K17Rik_chr17_45433598_45442544(+)_transcript=ENSMUST00000181149.1	B230354K17Rik	4897	4697.99	4.72257	0.105574	0.105574	No Change Medium Expression	spliced
B230377A18Rik_chr5_134176346_134177709(+)_transcript=ENSMUST00000192921.1	B230377A18Rik	1364	1164.99	0.319973	0.278331	0.255308	No Change Low Expression	spliced
B2m_chr2_122147686_122153083(+)_transcript=ENSMUST00000102476.4	B2m	860	660.994	15.9557	0	0	No Change Medium Expression	spliced
B3galnt1_chr3_69574158_69598960(-)_transcript=ENSMUST00000061826.2	B3galnt1	2028	1828.99	3.54966	0	0	No Change Medium Expression	spliced
B3galnt2_chr13_13954469_13999103(+)_transcript=ENSMUST00000099747.4	B3galnt2	3892	3692.99	10.3921	0	0	No Change Medium Expression	spliced
B3galt1_chr2_67565871_68122689(+)_transcript=ENSMUST00000042456.3	B3galt1	2855	2655.99	0.147861	0	0	No Change Low Expression	spliced
B3galt4_chr17_33949909_33951488(-)_transcript=ENSMUST00000087543.4	B3galt4	1580	1380.99	1.52958	0	0	No Change Medium Expression	spliced
B3galt6_chr4_155989466_155992649(-)_transcript=ENSMUST00000052185.4	B3galt6	3184	2984.99	1.33205	0	0	No Change Medium Expression	spliced
B3gat3_chr19_8920374_8927236(+)_transcript=ENSMUST00000096243.6	B3gat3	1603	1403.99	9.9247	0	0	No Change Medium Expression	spliced
B3glct_chr5_149678230_149762599(+)_transcript=ENSMUST00000100404.5	B3glct	4570	4370.99	16.4145	0.264383	-0.150027	No Change High Expression	spliced
B3gnt2_chr11_22759738_22860961(-)_transcript=ENSMUST00000062844.10	B3gnt2	3057	2857.99	3.38828	1.31437	-0.4035	No Change Medium Expression	spliced
B3gnt3_chr8_71690756_71701789(-)_transcript=ENSMUST00000034260.8	B3gnt3	3055	2855.99	0.493115	0	0	No Change Low Expression	spliced
B3gnt4_chr5_123510460_123511882(+)_transcript=ENSMUST00000031384.5	B3gnt4	1423	1223.99	0.363632	0	0	No Change Low Expression	spliced
B3gnt5_chr16_19760208_19772753(+)_transcript=ENSMUST00000121344.7	B3gnt5	4175	3975.99	3.39461	0.0575856	0.0575856	Down	spliced
B3gnt7_chr1_86302832_86307305(+)_transcript=ENSMUST00000113306.3	B3gnt7	2582	2382.99	40.3182	0	0	No Change High Expression	spliced
B3gnt8_chr7_25626654_25635100(+)_transcript=ENSMUST00000076034.7	B3gnt8	1463	1263.99	0.340141	0	0	No Change Low Expression	spliced
B3gnt9_chr8_105252638_105255153(-)_transcript=ENSMUST00000093217.8	B3gnt9	2325	2125.99	0.662385	0	0	No Change Low Expression	spliced
B3gntl1_chr11_121616197_121673153(-)_transcript=ENSMUST00000067399.13	B3gntl1	2864	2664.99	5.14845	0	0	No Change Medium Expression	spliced
B430218F22Rik_chr13_118386630_118388124(+)_transcript=ENSMUST00000181168.1	B430218F22Rik	1495	1295.99	0.193724	0	0	No Change Low Expression	spliced
B430305J03Rik_chr3_61362250_61365951(-)_transcript=ENSMUST00000066298.2	B430305J03Rik	3702	3502.99	0.472949	0	0	No Change Low Expression	spliced
B4galnt1_chr10_127165225_127172330(+)_transcript=ENSMUST00000006914.10	B4galnt1	2395	2195.99	2.13051	0	0	No Change Medium Expression	spliced
B4galnt2_chr11_95865943_95914891(-)_transcript=ENSMUST00000038343.6	B4galnt2	1722	1522.99	0.22091	0.0982719	0.0725485	No Change Low Expression	spliced
B4galnt3_chr6_120203073_120294559(-)_transcript=ENSMUST00000057283.7	B4galnt3	3677	3477.99	7.68552	0	0	No Change Medium Expression	spliced
B4galnt4_chr7_141061104_141072400(+)_transcript=ENSMUST00000048002.6	B4galnt4	3556	3356.99	10.3145	0.0232664	-0.0486772	No Change Medium Expression	spliced
B4galt1_chr4_40804602_40854005(-)_transcript=ENSMUST00000030121.12	B4galt1	3983	3783.99	24.1977	0	0	No Change High Expression	spliced
B4galt2_chr4_117869260_117883487(-)_transcript=ENSMUST00000030266.11	B4galt2	2312	2112.99	6.58469	0	0	No Change Medium Expression	spliced
B4galt3_chr1_171270328_171276896(+)_transcript=ENSMUST00000064272.9	B4galt3	1998	1798.99	12.1843	0	0	No Change Medium Expression	spliced
B4galt4_chr16_38742264_38769049(+)_transcript=ENSMUST00000114712.7	B4galt4	2168	1968.99	3.07372	0	0	No Change Medium Expression	spliced
B4galt5_chr2_167298444_167349183(-)_transcript=ENSMUST00000109221.8	B4galt5	4210	4010.99	22.4241	0.232086	-0.440052	No Change High Expression	spliced
B4galt6_chr18_20684599_20746404(-)_transcript=ENSMUST00000070080.5	B4galt6	5808	5608.99	26.7586	0	0	No Change High Expression	spliced
B4galt7_chr13_55599896_55610443(+)_transcript=ENSMUST00000064701.7	B4galt7	2130	1930.99	2.71287	0	0	No Change Medium Expression	spliced
B630019K06Rik_chrX_8892382_8894964(+)_transcript=ENSMUST00000064196.4	B630019K06Rik	2583	2383.99	0.156362	0	0	No Change Low Expression	spliced
B830012L14Rik_chr12_109676277_109714555(+)_transcript=ENSMUST00000238801.1	B830012L14Rik	3230	3030.99	8.76886	9.83323	3.67572	Down	spliced
B930036N10Rik_chr1_171500568_171504111(-)_transcript=ENSMUST00000181170.1	B930036N10Rik	3544	3344.99	0.897893	1.66039	1.36109	No Change Low Expression	spliced
B930086L07Rik_chr7_133116534_133120271(-)_transcript=ENSMUST00000209529.1	B930086L07Rik	3738	3538.99	6.7692	0	0	Down	spliced
B9d1_chr11_61505144_61512931(+)_transcript=ENSMUST00000102657.9	B9d1	817	617.994	16.1923	0.0767809	-0.0613561	No Change High Expression	spliced
B9d1os_chr11_61504386_61505059(-)_transcript=ENSMUST00000137010.1	B9d1os	674	474.994	0.174396	0	0	No Change Low Expression	spliced
B9d2_chr7_25680780_25686558(+)_transcript=ENSMUST00000205658.1	B9d2	995	795.994	2.61526	0	0	No Change Medium Expression	spliced
Babam1_chr8_71396861_71404619(+)_transcript=ENSMUST00000002473.9	Babam1	1433	1233.99	53.677	0	-0.0153485	No Change High Expression	spliced
Babam2_chr5_31697684_32084962(+)_transcript=ENSMUST00000201352.3	Babam2	1888	1688.99	17.5365	0	-0.272872	No Change High Expression	spliced
Bace1_chr9_45838580_45864399(+)_transcript=ENSMUST00000078111.10	Bace1	4041	3841.99	5.30254	0.0863785	0.0249844	No Change Medium Expression	spliced
Bach1_chr16_87698945_87733346(+)_transcript=ENSMUST00000026703.5	Bach1	5867	5667.99	17.3886	0	0	No Change High Expression	spliced
Bach2_chr4_32238804_32586108(+)_transcript=ENSMUST00000037416.12	Bach2	3462	3262.99	1.78336	1.97295	0.90257	No Change Medium Expression	spliced
Bad_chr19_6941861_6951899(+)_transcript=ENSMUST00000113423.9	Bad	990	790.994	4.24474	0	0	No Change Medium Expression	spliced
Bag1_chr4_40936398_40948294(-)_transcript=ENSMUST00000030125.4	Bag1	1295	1095.99	81.4341	0	-0.0153485	No Change High Expression	spliced
Bag2_chr1_33745484_33757795(-)_transcript=ENSMUST00000044691.8	Bag2	1860	1660.99	3.92921	0	0	No Change Medium Expression	spliced
Bag3_chr7_128523616_128546981(+)_transcript=ENSMUST00000033136.8	Bag3	2562	2362.99	8.2593	0	0	No Change Medium Expression	spliced
Bag4_chr8_25764538_25785287(-)_transcript=ENSMUST00000038498.9	Bag4	4876	4676.99	21.5307	0	0	No Change High Expression	spliced
Bag5_chr12_111709488_111713257(-)_transcript=ENSMUST00000054636.6	Bag5	2139	1939.99	7.21216	0	0	No Change Medium Expression	spliced
Bag6_chr17_35135178_35147322(+)_transcript=ENSMUST00000025250.13	Bag6	3858	3658.99	50.7858	0	0	No Change High Expression	spliced
Bahcc1_chr11_120232947_120292296(+)_transcript=ENSMUST00000122148.7	Bahcc1	10712	10513	13.125	0.0113485	-0.0021575	No Change Medium Expression	spliced
Bahd1_chr2_118900377_118924528(+)_transcript=ENSMUST00000036578.6	Bahd1	4594	4394.99	5.77626	0	0	No Change Medium Expression	spliced
Baiap2_chr11_119942763_120006782(+)_transcript=ENSMUST00000026436.9	Baiap2	2394	2194.99	2.99527	0.00959761	0.00959761	No Change Medium Expression	spliced
Baiap2l1_chr5_144264526_144358112(-)_transcript=ENSMUST00000055190.7	Baiap2l1	3247	3047.99	3.65784	0.0959761	-0.103555	No Change Medium Expression	spliced
Baiap2l2_chr15_79258195_79285537(-)_transcript=ENSMUST00000165408.7	Baiap2l2	2100	1900.99	0.954224	0	0	No Change Low Expression	spliced
Baiap3_chr17_25242659_25256364(-)_transcript=ENSMUST00000182056.7	Baiap3	4645	4445.99	0.285685	0	0	No Change Low Expression	spliced
Bak1_chr17_27019810_27029009(-)_transcript=ENSMUST00000078691.11	Bak1	2387	2187.99	22.4463	0	0	No Change High Expression	spliced
Bambi_chr18_3507923_3516404(+)_transcript=ENSMUST00000025075.2	Bambi	5074	4874.99	1.8305	0.00959761	0.00959761	No Change Medium Expression	spliced
Banf1_chr19_5364638_5367168(-)_transcript=ENSMUST00000170010.2	Banf1	758	558.994	155.311	0	0	No Change High Expression	spliced
Banp_chr8_121949750_122029258(+)_transcript=ENSMUST00000093078.12	Banp	2289	2089.99	8.14565	0	-0.271142	Up	spliced
Bap1_chr14_31251450_31259944(+)_transcript=ENSMUST00000022458.10	Bap1	3460	3260.99	40.2103	0	-0.0153485	No Change High Expression	spliced
Bard1_chr1_71027498_71103146(-)_transcript=ENSMUST00000027393.7	Bard1	5659	5459.99	21.5056	49.6481	23.1519	No Change High Expression	spliced
Barx1_chr13_48662998_48666507(+)_transcript=ENSMUST00000021813.4	Barx1	1399	1199.99	0.473768	0	0	No Change Low Expression	spliced
Basp1_chr15_25363277_25413764(-)_transcript=ENSMUST00000058845.8	Basp1	1855	1655.99	52.4237	1.49581	0.520821	Down	spliced
Batf3_chr1_191097847_191108945(+)_transcript=ENSMUST00000027943.5	Batf3	801	601.994	1.41297	0.0112086	0.0112086	No Change Medium Expression	spliced
Bax_chr7_45461697_45466898(-)_transcript=ENSMUST00000033093.9	Bax	867	667.994	129.9	0	0	No Change High Expression	spliced
Baz1a_chr12_54892989_55014348(-)_transcript=ENSMUST00000173433.7	Baz1a	5788	5588.99	23.9709	8.57739	4.09874	No Change High Expression	spliced
Baz1b_chr5_135187264_135246129(+)_transcript=ENSMUST00000002825.5	Baz1b	6492	6292.99	67.0332	0	-0.0251645	No Change High Expression	spliced
Baz2a_chr10_128091577_128129303(+)_transcript=ENSMUST00000045621.8	Baz2a	8369	8169.99	65.5504	0.0383665	0.0218081	Up	spliced
Baz2b_chr2_59899363_60209839(-)_transcript=ENSMUST00000112550.7	Baz2b	7895	7695.99	14.3478	8.3219	4.68909	No Change Medium Expression	spliced
BB218582_chr2_106642914_106650364(-)_transcript=ENSMUST00000123623.7	BB218582	1024	824.994	0.405546	0	0	No Change Low Expression	spliced
Bbc3_chr7_16308393_16318205(+)_transcript=ENSMUST00000002152.12	Bbc3	1814	1614.99	16.2096	0	0	No Change High Expression	spliced
Bbip1_chr19_53929861_53944627(-)_transcript=ENSMUST00000236370.1	Bbip1	662	462.994	7.65348	0.0191952	-0.0268504	No Change Medium Expression	spliced
Bbof1_chr12_84409071_84442887(+)_transcript=ENSMUST00000081828.12	Bbof1	2187	1987.99	0.59231	0.412697	0.335954	No Change Low Expression	spliced
Bbs1_chr19_4886878_4906628(-)_transcript=ENSMUST00000053506.7	Bbs1	5602	5402.99	0.71845	0	0	No Change Low Expression	spliced
Bbs10_chr10_111298679_111301727(+)_transcript=ENSMUST00000040454.4	Bbs10	2744	2544.99	2.59175	0	0	No Change Medium Expression	spliced
Bbs12_chr3_37312554_37321453(+)_transcript=ENSMUST00000057975.7	Bbs12	2433	2233.99	1.3336	6.23287	4.17784	No Change Medium Expression	spliced
Bbs2_chr8_94067954_94098928(-)_transcript=ENSMUST00000034206.5	Bbs2	3064	2864.99	7.02147	0.219505	-0.010534	No Change Medium Expression	spliced
Bbs4_chr9_59321990_59353508(-)_transcript=ENSMUST00000026265.7	Bbs4	2518	2318.99	8.40534	0	0	No Change Medium Expression	spliced
Bbs5_chr2_69647171_69667571(+)_transcript=ENSMUST00000074963.8	Bbs5	1468	1268.99	3.50015	0	0	No Change Medium Expression	spliced
Bbs7_chr3_36573142_36613477(-)_transcript=ENSMUST00000108156.8	Bbs7	2687	2487.99	3.85072	0	0	No Change Medium Expression	spliced
Bbs9_chr9_22475715_22888280(+)_transcript=ENSMUST00000039798.15	Bbs9	3382	3182.99	3.4974	0	0	No Change Medium Expression	spliced
Bbx_chr16_50191844_50432390(-)_transcript=ENSMUST00000138166.7	Bbx	8743	8543.99	13.5192	0	0	No Change Medium Expression	spliced
BC002059_chr17_16951539_16974157(+)_transcript=ENSMUST00000232328.1	BC002059	1598	1398.99	12.3238	6.06828	3.08935	No Change Medium Expression	spliced
BC003965_chr17_25184554_25187662(+)_transcript=ENSMUST00000088307.4	BC003965	3030	2830.99	4.95434	0	0	No Change Medium Expression	spliced
BC004004_chr17_29268788_29314065(+)_transcript=ENSMUST00000120346.8	BC004004	1148	948.994	13.0793	0	0	No Change Medium Expression	spliced
BC005537_chr13_24801657_24816197(+)_transcript=ENSMUST00000019276.11	BC005537	5849	5649.99	51.1526	0	0	No Change High Expression	spliced
BC005624_chr2_30972177_30982201(-)_transcript=ENSMUST00000028205.9	BC005624	1984	1784.99	12.6715	4.63371	3.05637	No Change Medium Expression	spliced
BC017158_chr7_128271379_128298170(-)_transcript=ENSMUST00000033044.15	BC017158	2627	2427.99	4.10652	4.01947	2.14695	No Change Medium Expression	spliced
BC021767_chr3_94661830_94670696(-)_transcript=ENSMUST00000136988.7	BC021767	905	705.994	0.688684	0.0169383	0.0169383	No Change Low Expression	spliced
BC022960_chrX_169368189_169370003(+)_transcript=ENSMUST00000119987.1	BC022960	1815	1615.99	1.97354	0.583112	0.391255	No Change Medium Expression	spliced
BC024063_chr10_82083353_82111216(+)_transcript=ENSMUST00000220287.1	BC024063	2726	2526.99	7.92614	0.0132961	0.0132961	No Change Medium Expression	spliced
BC024978_chr7_27195781_27210186(+)_transcript=ENSMUST00000179391.7	BC024978	1748	1548.99	5.39707	0	0	No Change Medium Expression	spliced
BC025920_chr10_81606270_81620703(+)_transcript=ENSMUST00000119492.1	BC025920	1895	1695.99	0.483638	1.45354	0.999437	No Change Low Expression	spliced
BC028528_chr3_95883954_95892005(-)_transcript=ENSMUST00000036360.12	BC028528	752	552.994	2.06029	0.0383904	0.0383904	No Change Medium Expression	spliced
BC029722_chr2_155817730_155819426(-)_transcript=ENSMUST00000124586.1	BC029722	1615	1415.99	2.16453	0	0	No Change Medium Expression	spliced
BC030343_chr5_143270075_143272513(+)_transcript=ENSMUST00000199606.1	BC030343	2439	2239.99	0.184904	0	0	No Change Low Expression	spliced
BC031181_chr18_75005868_75010152(+)_transcript=ENSMUST00000040284.5	BC031181	979	779.994	39.0625	0	0	No Change High Expression	spliced
BC034090_chr1_155212471_155244444(-)_transcript=ENSMUST00000186156.6	BC034090	4873	4673.99	1.98035	0.0692131	0.0692131	No Change Medium Expression	spliced
BC037704_chr19_43675178_43677176(+)_transcript=ENSMUST00000238165.1	BC037704	1999	1799.99	0.483217	0	0	No Change Low Expression	spliced
BC046401_chr2_165857684_165859034(+)_transcript=ENSMUST00000155786.1	BC046401	847	647.994	0.127847	0	0	No Change Low Expression	spliced
BC048403_chr10_121739937_121752878(+)_transcript=ENSMUST00000065600.7	BC048403	3123	2923.99	7.82208	0	0	No Change Medium Expression	spliced
BC051226_chr17_33908044_33909317(-)_transcript=ENSMUST00000172526.2	BC051226	978	778.994	1.56706	0	0	No Change Medium Expression	spliced
BC052040_chr2_115581716_115778768(+)_transcript=ENSMUST00000110918.2	BC052040	2735	2535.99	10.4063	0.00959761	-0.11319	No Change Medium Expression	spliced
BC055324_chr1_163945993_163994796(-)_transcript=ENSMUST00000045876.7	BC055324	3179	2979.99	25.3891	0	0	No Change High Expression	spliced
BC060293_chr7_34250252_34251355(-)_transcript=ENSMUST00000207005.1	BC060293	1104	904.994	0.284483	0	0	No Change Low Expression	spliced
BC065397_chrX_136741824_136803364(+)_transcript=ENSMUST00000134066.7	BC065397	3201	3001.99	2.84046	1.60764	0.3469	No Change Medium Expression	spliced
BC067074_chr13_113293159_113379711(+)_transcript=ENSMUST00000136755.9	BC067074	8274	8074.99	12.0697	0.127422	-0.10588	Up	spliced
BC085271_chr1_183205071_183206557(-)_transcript=ENSMUST00000191852.1	BC085271	1487	1287.99	0.218914	0	0	No Change Low Expression	spliced
BC106179_chr16_23220656_23225484(-)_transcript=ENSMUST00000055369.4	BC106179	4128	3928.99	0.20413	0.655215	0.655215	No Change Low Expression	spliced
Bcam_chr7_19756131_19771016(-)_transcript=ENSMUST00000003061.13	Bcam	2429	2229.99	55.5602	7.29919	0.89858	Down	spliced
Bcan_chr3_87987531_88000230(-)_transcript=ENSMUST00000090971.10	Bcan	3141	2941.99	0.223565	0	0	No Change Low Expression	spliced
Bcap29_chr12_31590967_31634658(-)_transcript=ENSMUST00000020979.8	Bcap29	1949	1749.99	13.4065	0.0767809	0.0307353	No Change Medium Expression	spliced
Bcap31_chrX_73686178_73716175(-)_transcript=ENSMUST00000002091.5	Bcap31	1219	1019.99	45.0571	0.413515	0.141932	No Change High Expression	spliced
Bcar1_chr8_111710474_111743809(-)_transcript=ENSMUST00000166232.3	Bcar1	3142	2942.99	47.1107	2.76902e-07	2.76902e-07	No Change High Expression	spliced
Bcar3_chr3_122294136_122530191(+)_transcript=ENSMUST00000029766.8	Bcar3	3311	3111.99	10.8153	0.249328	-0.257149	No Change Medium Expression	spliced
Bcas1_chr2_170346991_170427845(-)_transcript=ENSMUST00000068137.10	Bcas1	2769	2569.99	0.396568	0	0	No Change Low Expression	spliced
Bcas2_chr3_103171655_103179166(+)_transcript=ENSMUST00000005830.14	Bcas2	1467	1267.99	81.0769	0	0	No Change High Expression	spliced
Bcas3_chr11_85353167_85826058(+)_transcript=ENSMUST00000092821.9	Bcas3	2769	2569.99	11.5434	0.783763	-0.418537	Up	spliced
Bcat1_chr6_144993835_145076184(-)_transcript=ENSMUST00000111742.7	Bcat1	2556	2356.99	104.06	0	0	No Change High Expression	spliced
Bcat2_chr7_45570153_45589711(+)_transcript=ENSMUST00000211173.1	Bcat2	1684	1484.99	60.3994	0	0	No Change High Expression	spliced
Bccip_chr7_133709333_133721145(+)_transcript=ENSMUST00000033282.4	Bccip	1244	1044.99	76.6583	0	0	No Change High Expression	spliced
Bcdin3d_chr15_99470079_99474730(-)_transcript=ENSMUST00000040313.5	Bcdin3d	1276	1076.99	6.41746	3.39415	1.79672	No Change Medium Expression	spliced
Bche_chr3_73635808_73708415(-)_transcript=ENSMUST00000029367.5	Bche	6210	6010.99	0.541334	0.747744	0.57891	No Change Low Expression	spliced
Bckdha_chr7_25629946_25658981(-)_transcript=ENSMUST00000071329.7	Bckdha	1899	1699.99	24.6317	0.0959761	-0.0421609	No Change High Expression	spliced
Bckdhb_chr9_83925145_84124240(+)_transcript=ENSMUST00000190166.6	Bckdhb	1398	1198.99	14.2251	0.132848	0.0888013	No Change Medium Expression	spliced
Bckdk_chr7_127904082_127910221(+)_transcript=ENSMUST00000124533.2	Bckdk	1792	1592.99	33.5488	0	0	No Change High Expression	spliced
Bcl10_chr3_145922804_145934356(+)_transcript=ENSMUST00000029842.8	Bcl10	1949	1749.99	23.5614	0.865202	0.286293	No Change High Expression	spliced
Bcl11a_chr11_24078056_24174123(+)_transcript=ENSMUST00000000881.12	Bcl11a	3061	2861.99	0.87351	1.3097	0.840981	No Change Low Expression	spliced
Bcl11b_chr12_107910403_108003602(-)_transcript=ENSMUST00000109887.7	Bcl11b	2522	2322.99	0.404275	0	0	No Change Low Expression	spliced
Bcl2_chr1_106538178_106714274(-)_transcript=ENSMUST00000112751.1	Bcl2	7191	6991.99	0.443008	1.44083	1.13996	No Change Low Expression	spliced
Bcl2l1_chr2_152780668_152831728(-)_transcript=ENSMUST00000007803.11	Bcl2l1	2417	2217.99	16.284	0.502345	-0.207793	No Change High Expression	spliced
Bcl2l11_chr2_128126038_128162547(+)_transcript=ENSMUST00000110341.8	Bcl2l11	5036	4836.99	12.182	0	0	No Change Medium Expression	spliced
Bcl2l12_chr7_44991222_44998712(-)_transcript=ENSMUST00000003290.11	Bcl2l12	1075	875.994	12.558	0	0	No Change Medium Expression	spliced
Bcl2l13_chr6_120836212_120892842(+)_transcript=ENSMUST00000009256.3	Bcl2l13	6925	6725.99	11.13	0.0287928	-0.0326013	No Change Medium Expression	spliced
Bcl2l14_chr6_134396318_134438736(+)_transcript=ENSMUST00000111960.1	Bcl2l14	1578	1378.99	0.861316	0	0	No Change Low Expression	spliced
Bcl2l15_chr3_103832601_103854618(+)_transcript=ENSMUST00000106822.1	Bcl2l15	1902	1702.99	0.265739	0.558262	0.422724	No Change Low Expression	spliced
Bcl2l2_chr14_54883377_54888234(+)_transcript=ENSMUST00000022806.9	Bcl2l2	3509	3309.99	7.48016	0	0	No Change Medium Expression	spliced
Bcl3_chr7_19808462_19822770(-)_transcript=ENSMUST00000120537.7	Bcl3	1850	1650.99	9.71932	0	0	No Change Medium Expression	spliced
Bcl6_chr16_23965052_23988852(-)_transcript=ENSMUST00000023151.5	Bcl6	3525	3325.99	0.717619	0	0	No Change Low Expression	spliced
Bcl6b_chr11_70224128_70229798(-)_transcript=ENSMUST00000000326.11	Bcl6b	3366	3166.99	4.82068	0	0	No Change Medium Expression	spliced
Bcl7a_chr5_123343834_123374992(+)_transcript=ENSMUST00000031391.8	Bcl7a	4718	4518.99	7.8602	0.23994	0.086455	No Change Medium Expression	spliced
Bcl7b_chr5_135168283_135181855(+)_transcript=ENSMUST00000031692.11	Bcl7b	1758	1558.99	5.20969	0.0164183	0.0164183	No Change Medium Expression	spliced
Bcl7c_chr7_127661456_127708933(-)_transcript=ENSMUST00000061468.8	Bcl7c	1132	932.994	12.8437	0	0	No Change Medium Expression	spliced
Bcl9_chr3_97203662_97297917(-)_transcript=ENSMUST00000046521.13	Bcl9	6102	5902.99	12.857	0	0	No Change Medium Expression	spliced
Bcl9l_chr9_44482825_44511896(+)_transcript=ENSMUST00000220303.1	Bcl9l	5760	5560.99	3.33554	0	0	No Change Medium Expression	spliced
Bclaf1_chr10_20312469_20344613(+)_transcript=ENSMUST00000185800.6	Bclaf1	3142	2942.99	144.132	458.916	306.168	No Change High Expression	spliced
Bclaf3_chrX_159526688_159593081(+)_transcript=ENSMUST00000057180.12	Bclaf3	2513	2313.99	33.6797	49.2299	26.4809	No Change High Expression	spliced
Bcor_chrX_12036740_12160355(-)_transcript=ENSMUST00000043441.12	Bcor	6113	5913.99	12.3429	0	0	No Change Medium Expression	spliced
Bcorl1_chrX_48341358_48408049(+)_transcript=ENSMUST00000037596.12	Bcorl1	7360	7160.99	2.40121	0.0622574	-0.149232	No Change Medium Expression	spliced
Bcr_chr10_75060592_75184921(+)_transcript=ENSMUST00000164107.2	Bcr	6839	6639.99	7.63649	0.422524	0.02873	No Change Medium Expression	spliced
Bcs1l_chr1_74588289_74592443(+)_transcript=ENSMUST00000113732.1	Bcs1l	1679	1479.99	8.48052	0	0	No Change Medium Expression	spliced
Bdh1_chr16_31422280_31458901(+)_transcript=ENSMUST00000089759.8	Bdh1	1711	1511.99	3.08437	0	0	No Change Medium Expression	spliced
Bdh2_chr3_135281221_135304426(+)_transcript=ENSMUST00000029817.10	Bdh2	1059	859.994	5.4808	0	0	No Change Medium Expression	spliced
Bdkrb2_chr12_105563226_105595237(+)_transcript=ENSMUST00000001652.6	Bdkrb2	3792	3592.99	0.363238	0	0	No Change Low Expression	spliced
Bdnf_chr2_109674700_109727007(+)_transcript=ENSMUST00000111047.8	Bdnf	4042	3842.99	0.445915	0	0	No Change Low Expression	spliced
Bdp1_chr13_100017994_100104070(-)_transcript=ENSMUST00000109379.8	Bdp1	7567	7367.99	21.7921	78.8996	40.9407	No Change High Expression	spliced
Becn1_chr11_101285952_101302286(-)_transcript=ENSMUST00000172233.7	Becn1	1493	1293.99	21.3541	0	0	No Change High Expression	spliced
Begain_chr12_109032187_109068217(-)_transcript=ENSMUST00000190647.2	Begain	2707	2507.99	0.857854	0	0	No Change Low Expression	spliced
Bend3_chr10_43478831_43515396(+)_transcript=ENSMUST00000167488.8	Bend3	6337	6137.99	15.6412	0	0	Down	spliced
Bend4_chr5_67392147_67428310(-)_transcript=ENSMUST00000169190.4	Bend4	7935	7735.99	18.1115	0	0	No Change High Expression	spliced
Bend5_chr4_111415006_111460298(+)_transcript=ENSMUST00000030274.6	Bend5	1826	1626.99	1.0112	0	0	No Change Medium Expression	spliced
Bend6_chr1_33852052_33907816(-)_transcript=ENSMUST00000062289.10	Bend6	2487	2287.99	1.18088	0.0503439	0.0503439	No Change Medium Expression	spliced
Bend7_chr2_4717831_4802142(+)_transcript=ENSMUST00000056914.6	Bend7	2302	2102.99	0.949262	0.0287928	-0.0169934	No Change Low Expression	spliced
Best1_chr19_9985174_10001633(-)_transcript=ENSMUST00000117346.1	Best1	2080	1880.99	0.608146	0	0	No Change Low Expression	spliced
Best2_chr8_85007202_85014531(-)_transcript=ENSMUST00000059072.5	Best2	1971	1771.99	0.214534	0	0	No Change Low Expression	spliced
Bet1_chr6_4076899_4086972(-)_transcript=ENSMUST00000049166.4	Bet1	1516	1316.99	5.79948	0	0	No Change Medium Expression	spliced
Bet1l_chr7_140853394_140857577(-)_transcript=ENSMUST00000211527.1	Bet1l	298	101.93	14.3391	0	0	No Change Medium Expression	spliced
Bex1_chrX_136213972_136215513(-)_transcript=ENSMUST00000058125.8	Bex1	866	666.994	308.906	0	-0.0691713	No Change High Expression	spliced
Bex2_chrX_136066564_136068236(-)_transcript=ENSMUST00000049130.7	Bex2	903	703.994	35.2202	0.0110238	0.0110238	No Change High Expression	spliced
Bex3_chrX_136270253_136271978(+)_transcript=ENSMUST00000113113.1	Bex3	766	566.994	136.219	0	0	No Change High Expression	spliced
Bex4_chrX_136138996_136140443(+)_transcript=ENSMUST00000116527.1	Bex4	837	637.994	128.612	0	0	No Change High Expression	spliced
Bfar_chr16_13671858_13703612(+)_transcript=ENSMUST00000023365.12	Bfar	3003	2803.99	7.54791	0.00959761	0.00959761	No Change Medium Expression	spliced
Bglap3_chr3_88368616_88372743(-)_transcript=ENSMUST00000107543.7	Bglap3	1047	847.994	0.761927	0	0	No Change Low Expression	spliced
Bgn_chrX_73483602_73495933(+)_transcript=ENSMUST00000033741.14	Bgn	2419	2219.99	1.33716	0	0	No Change Medium Expression	spliced
Bhlha15_chr5_144190286_144194441(+)_transcript=ENSMUST00000060747.7	Bhlha15	3494	3294.99	0.403953	0	0	Up	spliced
Bhlhb9_chrX_135797594_135891081(+)_transcript=ENSMUST00000180025.7	Bhlhb9	2812	2612.99	15.36	0	-0.0301967	No Change Medium Expression	spliced
Bhlhe22_chr3_18054174_18057517(+)_transcript=ENSMUST00000026120.7	Bhlhe22	3344	3144.99	0.263393	0.302325	0.271628	No Change Low Expression	spliced
Bhlhe40_chr6_108660629_108666925(+)_transcript=ENSMUST00000032194.10	Bhlhe40	3113	2913.99	9.79203	0	0	No Change Medium Expression	spliced
Bhlhe41_chr6_145858243_145865558(-)_transcript=ENSMUST00000032386.10	Bhlhe41	6133	5933.99	0.491106	0	0	No Change Low Expression	spliced
Bicc1_chr10_70922832_71159700(-)_transcript=ENSMUST00000143791.7	Bicc1	5431	5231.99	1.20663	0	0	No Change Medium Expression	spliced
Bicd1_chr6_149408886_149563329(+)_transcript=ENSMUST00000003544.13	Bicd1	2928	2728.99	3.90482	10.9291	7.23133	Down	spliced
Bicd2_chr13_49341585_49387026(+)_transcript=ENSMUST00000048544.13	Bicd2	6309	6109.99	5.20908	0	0	No Change Medium Expression	spliced
Bicdl1_chr5_115648175_115731621(-)_transcript=ENSMUST00000055408.12	Bicdl1	3026	2826.99	9.5885	0.11887	-0.02485	No Change Medium Expression	spliced
Bicdl2_chr17_23660506_23668621(+)_transcript=ENSMUST00000232760.1	Bicdl2	1990	1790.99	0.727438	0	0	No Change Low Expression	spliced
Bicra_chr7_15970672_16047921(-)_transcript=ENSMUST00000210781.1	Bicra	5975	5775.99	4.5208	0	0	No Change Medium Expression	spliced
Bicral_chr17_46798120_46858482(-)_transcript=ENSMUST00000040624.6	Bicral	6575	6375.99	20.6949	0	-0.0456362	No Change High Expression	spliced
Bid_chr6_120891930_120916853(-)_transcript=ENSMUST00000004560.11	Bid	2189	1989.99	13.4256	0	0	No Change Medium Expression	spliced
Bik_chr15_83526862_83544634(+)_transcript=ENSMUST00000016902.4	Bik	942	742.994	2.65701	0	0	No Change Medium Expression	spliced
Bin1_chr18_32377230_32435737(+)_transcript=ENSMUST00000091967.12	Bin1	2091	1891.99	3.13534	0.00959761	0.00959761	No Change Medium Expression	spliced
Bin2_chr15_100641077_100669553(-)_transcript=ENSMUST00000183211.7	Bin2	2036	1836.99	4.25302	0.0479881	0.0326396	Up	spliced
Bin3_chr14_70100105_70138206(+)_transcript=ENSMUST00000022680.8	Bin3	1767	1567.99	5.11026	0.0863785	-0.220592	No Change Medium Expression	spliced
Birc2_chr9_7818227_7837064(-)_transcript=ENSMUST00000074246.6	Birc2	3130	2930.99	15.9271	36.8857	21.1631	No Change Medium Expression	spliced
Birc3_chr9_7848699_7873186(-)_transcript=ENSMUST00000013949.14	Birc3	2667	2467.99	2.42158	0.0195391	-0.0111579	No Change Medium Expression	spliced
Birc5_chr11_117849251_117855743(+)_transcript=ENSMUST00000081387.10	Birc5	947	747.994	104.764	0	-0.0153485	No Change High Expression	spliced
Birc6_chr17_74528295_74703356(+)_transcript=ENSMUST00000182597.7	Birc6	14649	14450	20.6448	5.58955e-05	-0.000154319	No Change High Expression	spliced
Birc7_chr2_180929023_180934010(+)_transcript=ENSMUST00000108875.1	Birc7	1178	978.994	0.286975	0	0	No Change Low Expression	spliced
Bivm_chr1_44118957_44144770(+)_transcript=ENSMUST00000035991.7	Bivm	3313	3113.99	8.51029	0	0	No Change Medium Expression	spliced
Blcap_chr2_157556362_157571274(-)_transcript=ENSMUST00000109528.8	Blcap	2056	1856.99	9.7759	0.00959761	0.00959761	No Change Medium Expression	spliced
Blm_chr7_80454733_80535119(-)_transcript=ENSMUST00000081314.10	Blm	4598	4398.99	32.5622	3.41675	-0.45438	No Change High Expression	spliced
Blmh_chr11_76924809_76987379(+)_transcript=ENSMUST00000021197.9	Blmh	2497	2297.99	44.9099	0.259136	-0.247315	No Change High Expression	spliced
Blnk_chr19_40928927_40994535(-)_transcript=ENSMUST00000117695.7	Blnk	1701	1501.99	1.73322	0	0	No Change Medium Expression	spliced
Bloc1s1_chr10_128917882_128924035(-)_transcript=ENSMUST00000026405.9	Bloc1s1	550	350.994	23.3222	0	0	No Change High Expression	spliced
Bloc1s2_chr19_44139246_44146446(-)_transcript=ENSMUST00000079033.5	Bloc1s2	885	685.994	37.181	0	0	No Change High Expression	spliced
Bloc1s2-ps_chr2_52619754_52620185(+)_transcript=ENSMUST00000183232.1	Bloc1s2-ps	432	232.994	1.67524	0	0	No Change Medium Expression	spliced
Bloc1s3_chr7_19504486_19508367(-)_transcript=ENSMUST00000077408.7	Bloc1s3	3188	2988.99	2.07512	0	0	No Change Medium Expression	spliced
Bloc1s4_chr5_36747378_36748650(-)_transcript=ENSMUST00000071949.4	Bloc1s4	1273	1073.99	3.23945	0	0	No Change Medium Expression	spliced
Bloc1s5_chr13_38592842_38635109(-)_transcript=ENSMUST00000224902.1	Bloc1s5	612	412.994	1.56683	0.00959761	-0.0210994	No Change Medium Expression	spliced
Bloc1s6_chr2_122738503_122749475(+)_transcript=ENSMUST00000005954.8	Bloc1s6	3484	3284.99	4.7506	0	0	No Change Medium Expression	spliced
Blvra_chr2_127070665_127097084(+)_transcript=ENSMUST00000110389.9	Blvra	657	457.994	3.82938	0	0	No Change Medium Expression	spliced
Blvrb_chr7_27447978_27466144(+)_transcript=ENSMUST00000108357.7	Blvrb	782	582.994	20.2396	0	0	No Change High Expression	spliced
Blzf1_chr1_164289800_164307489(-)_transcript=ENSMUST00000120447.7	Blzf1	2430	2230.99	8.23853	0	0	No Change Medium Expression	spliced
Bmerb1_chr16_13986604_14101500(+)_transcript=ENSMUST00000056521.11	Bmerb1	2394	2194.99	6.7523	2.41794	1.13524	Down	spliced
Bmf_chr2_118528757_118549687(-)_transcript=ENSMUST00000090219.12	Bmf	4642	4442.99	4.45986	0	-0.0153485	Up	spliced
Bmi1_chr2_18677018_18686629(+)_transcript=ENSMUST00000051929.12	Bmi1	2747	2547.99	2.29959	0	0	No Change Medium Expression	spliced
Bmp1_chr14_70474558_70520234(-)_transcript=ENSMUST00000022693.8	Bmp1	3684	3484.99	5.40472	0	0	Down	spliced
Bmp2_chr2_133552159_133562885(+)_transcript=ENSMUST00000028836.6	Bmp2	3555	3355.99	0.29734	0	0	No Change Low Expression	spliced
Bmp2k_chr5_96997689_97091867(+)_transcript=ENSMUST00000035635.9	Bmp2k	7387	7187.99	2.84386	6.13803	3.47798	No Change Medium Expression	spliced
Bmp4_chr14_46383520_46390669(-)_transcript=ENSMUST00000074077.11	Bmp4	2064	1864.99	4.94931	0	0	No Change Medium Expression	spliced
Bmp6_chr13_38345107_38500302(+)_transcript=ENSMUST00000171970.2	Bmp6	3593	3393.99	0.799776	0	0	No Change Low Expression	spliced
Bmp7_chr2_172868012_172940321(-)_transcript=ENSMUST00000009143.7	Bmp7	3670	3470.99	2.31162	0.0383904	-0.0997466	No Change Medium Expression	spliced
Bmp8a_chr4_123312645_123343252(-)_transcript=ENSMUST00000102641.9	Bmp8a	1917	1717.99	1.84302	1.50987	0.898653	No Change Medium Expression	spliced
Bmp8b_chr4_123105165_123132099(+)_transcript=ENSMUST00000002457.1	Bmp8b	2940	2740.99	2.23224	0.452081	0.327849	No Change Medium Expression	spliced
Bmpr1a_chr14_34410734_34503341(-)_transcript=ENSMUST00000049005.14	Bmpr1a	5956	5756.99	23.6039	0	0	Down	spliced
Bmpr1b_chr3_141837136_142169425(-)_transcript=ENSMUST00000098568.7	Bmpr1b	1910	1710.99	0.897598	0	0	No Change Low Expression	spliced
Bmpr2_chr1_59763400_59879014(+)_transcript=ENSMUST00000087435.6	Bmpr2	12899	12700	10.6698	13.5253	7.77869	Down	spliced
Bms1_chr6_118383381_118419474(-)_transcript=ENSMUST00000032237.7	Bms1	4345	4145.99	46.761	0.0191952	-0.0575474	No Change High Expression	spliced
Bmt2_chr6_13625673_13677966(-)_transcript=ENSMUST00000045235.7	Bmt2	4143	3943.99	5.05391	0.124769	-0.028716	No Change Medium Expression	spliced
Bmyc_chr2_25706739_25707721(+)_transcript=ENSMUST00000061483.8	Bmyc	983	783.994	2.74716	0	0	No Change Medium Expression	spliced
Bnc2_chr4_84275095_84675275(-)_transcript=ENSMUST00000107198.8	Bnc2	3948	3748.99	8.52366	0.268542	0.076302	No Change Medium Expression	spliced
Bnip1_chr17_26781066_26792565(+)_transcript=ENSMUST00000015725.15	Bnip1	1098	898.994	12.379	0.147176	0.009039	No Change Medium Expression	spliced
Bnip2_chr9_69989466_70008317(+)_transcript=ENSMUST00000085393.12	Bnip2	2328	2128.99	19.5371	0	0	No Change High Expression	spliced
Bnip3_chr7_138890836_138909519(-)_transcript=ENSMUST00000106112.1	Bnip3	1756	1556.99	35.2149	0	0	No Change High Expression	spliced
Bnip3l_chr14_66985239_67008877(-)_transcript=ENSMUST00000022634.8	Bnip3l	3238	3038.99	30.5153	0	0	No Change High Expression	spliced
Bnip3l-ps_chr12_18216542_18217673(+)_transcript=ENSMUST00000101577.5	Bnip3l-ps	657	457.994	4.4993	0	0	No Change Medium Expression	spliced
Bnip5_chr17_28896392_28915324(-)_transcript=ENSMUST00000062357.5	Bnip5	4597	4397.99	2.26452	0	0	No Change Medium Expression	spliced
Bnipl_chr3_95241271_95251193(-)_transcript=ENSMUST00000137250.8	Bnipl	1251	1051.99	1.45703	0	0	No Change Medium Expression	spliced
Boc_chr16_44485049_44558897(-)_transcript=ENSMUST00000114634.2	Boc	4451	4251.99	0.692845	0.0479881	0.0479881	No Change Low Expression	spliced
Bod1_chr11_31665181_31671885(-)_transcript=ENSMUST00000058060.13	Bod1	1394	1194.99	28.7852	0	0	No Change High Expression	spliced
Bod1-ps_chr16_17734169_17734686(+)_transcript=ENSMUST00000231811.1	Bod1-ps	518	318.994	0.142202	0	0	No Change Low Expression	spliced
Bod1l_chr5_41787538_41844315(-)_transcript=ENSMUST00000202908.1	Bod1l	10399	10200	23.3763	12.6647	7.34909	No Change High Expression	spliced
Bok_chr1_93685660_93695764(+)_transcript=ENSMUST00000027499.12	Bok	1468	1268.99	10.0202	0	0	No Change Medium Expression	spliced
Bola1_chr3_96196588_96219709(-)_transcript=ENSMUST00000016087.3	Bola1	729	529.994	9.23629	0	0	No Change Medium Expression	spliced
Bola2_chr7_126695401_126699798(+)_transcript=ENSMUST00000106369.1	Bola2	642	442.994	48.1651	0	0	No Change High Expression	spliced
Bola3_chr6_83349147_83360136(+)_transcript=ENSMUST00000122216.7	Bola3	554	354.994	21.0852	0	0	No Change High Expression	spliced
Boll_chr1_55248658_55363469(-)_transcript=ENSMUST00000087585.9	Boll	882	682.994	2.19399	0	0	No Change Medium Expression	spliced
Bop1_chr15_76452989_76477277(-)_transcript=ENSMUST00000023217.10	Bop1	2491	2291.99	46.9322	0.580466	0.074502	No Change High Expression	spliced
Bora_chr14_99046222_99074540(+)_transcript=ENSMUST00000022656.7	Bora	2726	2526.99	22.9796	0.178481	-0.232675	No Change High Expression	spliced
Borcs5_chr6_134639510_134711187(+)_transcript=ENSMUST00000062755.9	Borcs5	1764	1564.99	1.76636	0	0	No Change Medium Expression	spliced
Borcs6_chr11_69059717_69061578(+)_transcript=ENSMUST00000051888.3	Borcs6	1862	1662.99	1.34492	0	0	No Change Medium Expression	spliced
Borcs7_chr19_46689906_46703382(+)_transcript=ENSMUST00000074912.7	Borcs7	2176	1976.99	1.34302	0	0	No Change Medium Expression	spliced
Borcs8_chr8_70139499_70147319(+)_transcript=ENSMUST00000110139.1	Borcs8	679	479.994	13.036	0	0	No Change Medium Expression	spliced
Bpgm_chr6_34476207_34505613(+)_transcript=ENSMUST00000045372.5	Bpgm	2220	2020.99	5.64862	0	0	No Change Medium Expression	spliced
Bphl_chr13_34037597_34074074(+)_transcript=ENSMUST00000040656.7	Bphl	1253	1053.99	3.34847	0	0	No Change Medium Expression	spliced
Bpifb4_chr2_153938221_153964101(+)_transcript=ENSMUST00000099181.1	Bpifb4	1479	1279.99	0.255722	0	0	No Change Low Expression	spliced
Bpifb5_chr2_154223742_154240902(+)_transcript=ENSMUST00000045959.7	Bpifb5	1637	1437.99	0.338015	0	0	No Change Low Expression	spliced
Bpnt1_chr1_185332149_185357777(+)_transcript=ENSMUST00000027916.12	Bpnt1	2200	2000.99	32.0379	0	0	No Change High Expression	spliced
Bptf_chr11_107033081_107132127(-)_transcript=ENSMUST00000057892.14	Bptf	11488	11289	70.3792	3.73656	0.8298	No Change High Expression	spliced
Braf_chr6_39603237_39725463(-)_transcript=ENSMUST00000002487.14	Braf	9728	9528.99	11.9361	1.25789	-0.23546	No Change Medium Expression	spliced
Brap_chr5_121660563_121687256(+)_transcript=ENSMUST00000031414.14	Brap	3744	3544.99	12.58	0	0	No Change Medium Expression	spliced
Brat1_chr5_140705011_140719379(+)_transcript=ENSMUST00000041588.12	Brat1	3333	3133.99	4.9294	0	0	No Change Medium Expression	spliced
Brca1_chr11_101488764_101551955(-)_transcript=ENSMUST00000017290.10	Brca1	6572	6372.99	43.2001	0.0374692	0.0374692	Up	spliced
Brca2_chr5_150522630_150570329(+)_transcript=ENSMUST00000202313.1	Brca2	10517	10318	25.3657	0.431893	0.101126	No Change High Expression	spliced
Brcc3_chrX_75416628_75454001(+)_transcript=ENSMUST00000033544.13	Brcc3	4310	4110.99	6.21347	0	0	Down	spliced
Brd1_chr15_88687034_88734233(-)_transcript=ENSMUST00000109381.8	Brd1	5152	4952.99	29.286	0	0	No Change High Expression	spliced
Brd2_chr17_34112023_34122634(-)_transcript=ENSMUST00000095347.12	Brd2	2617	2417.99	95.2911	0	0	No Change High Expression	spliced
Brd3_chr2_27445579_27507662(-)_transcript=ENSMUST00000077737.12	Brd3	5272	5072.99	32.9173	0	0	No Change High Expression	spliced
Brd3os_chr2_27442324_27444221(+)_transcript=ENSMUST00000209765.1	Brd3os	1898	1698.99	0.341295	0.172757	0.14206	No Change Low Expression	spliced
Brd4_chr17_32196274_32284722(-)_transcript=ENSMUST00000121285.7	Brd4	5922	5722.99	65.743	0.0382205	0.0076031	No Change High Expression	spliced
Brd7_chr8_88331039_88362194(-)_transcript=ENSMUST00000034085.7	Brd7	3625	3425.99	36.1152	0	0	No Change High Expression	spliced
Brd8_chr18_34598615_34624601(-)_transcript=ENSMUST00000097626.9	Brd8	3005	2805.99	31.6183	0	-0.0153485	No Change High Expression	spliced
Brd8dc_chr18_34579846_34597468(-)_transcript=ENSMUST00000056932.8	Brd8dc	2362	2162.99	0.447139	0	0	No Change Low Expression	spliced
Brd9_chr13_73937811_73960895(+)_transcript=ENSMUST00000099384.3	Brd9	2407	2207.99	6.7231	0.0191951	0.0038472	No Change Medium Expression	spliced
Brdt_chr5_107331159_107387058(+)_transcript=ENSMUST00000112677.9	Brdt	1607	1407.99	0.710746	0	0	No Change Low Expression	spliced
Brf1_chr12_112960085_113000704(-)_transcript=ENSMUST00000011302.8	Brf1	2615	2415.99	10.2154	0.333975	-0.12177	No Change Medium Expression	spliced
Brf2_chr8_27123364_27128680(-)_transcript=ENSMUST00000033877.5	Brf2	1899	1699.99	6.95472	0	0	No Change Medium Expression	spliced
Bri3_chr5_144244437_144446757(+)_transcript=ENSMUST00000110695.7	Bri3	669	469.994	33.4786	0	0	No Change High Expression	spliced
Bri3bp_chr5_125441568_125460370(+)_transcript=ENSMUST00000049040.13	Bri3bp	6473	6273.99	15.684	0	0	No Change Medium Expression	spliced
Bricd5_chr17_24473884_24475469(+)_transcript=ENSMUST00000238986.1	Bricd5	849	649.994	0.509771	0	0	No Change Low Expression	spliced
Brinp1_chr4_68761514_68954397(-)_transcript=ENSMUST00000030036.5	Brinp1	3212	3012.99	0.528925	0	0	No Change Low Expression	spliced
Brinp2_chr1_158245269_158356326(-)_transcript=ENSMUST00000004133.10	Brinp2	4167	3967.99	0.334241	0	0	No Change Low Expression	spliced
Brip1_chr11_86058138_86201193(-)_transcript=ENSMUST00000044423.3	Brip1	6931	6731.99	6.9647	0.271748	0.133611	No Change Medium Expression	spliced
Brip1os_chr11_86201370_86304443(+)_transcript=ENSMUST00000128960.1	Brip1os	4423	4223.99	8.27741	0	0	No Change Medium Expression	spliced
Brix1_chr15_10474779_10485947(-)_transcript=ENSMUST00000022855.11	Brix1	2664	2464.99	42.8927	0	0	No Change High Expression	spliced
Brk1_chr6_113604772_113616951(+)_transcript=ENSMUST00000035725.6	Brk1	1095	895.994	32.203	0	0	No Change High Expression	spliced
Brms1l_chr12_55836324_55869736(+)_transcript=ENSMUST00000059250.7	Brms1l	2609	2409.99	16.9222	0	0	No Change High Expression	spliced
Brox_chr1_183276352_183297269(-)_transcript=ENSMUST00000057062.11	Brox	3430	3230.99	11.2673	0	0	No Change Medium Expression	spliced
Brpf1_chr6_113307137_113324860(+)_transcript=ENSMUST00000113117.3	Brpf1	4540	4340.99	7.89254	0	0	No Change Medium Expression	spliced
Brpf3_chr17_28801090_28839949(+)_transcript=ENSMUST00000233088.1	Brpf3	2597	2397.99	16.6832	0	0	No Change High Expression	spliced
Brsk1_chr7_4690604_4715997(+)_transcript=ENSMUST00000048248.8	Brsk1	2996	2796.99	7.65805	0	0	No Change Medium Expression	spliced
Brsk2_chr7_141949751_142004247(+)_transcript=ENSMUST00000075528.11	Brsk2	2160	1960.99	0.793468	0	0	No Change Low Expression	spliced
Brwd1_chr16_95992092_96082526(-)_transcript=ENSMUST00000232755.1	Brwd1	9843	9643.99	25.8206	0	0	No Change High Expression	spliced
Brwd3_chrX_108737016_108834372(-)_transcript=ENSMUST00000150434.7	Brwd3	11619	11420	13.0539	3.42089	1.41415	No Change Medium Expression	spliced
Bscl2_chr19_8837467_8848683(+)_transcript=ENSMUST00000159634.7	Bscl2	1684	1484.99	15.8311	0	-0.0770015	No Change Medium Expression	spliced
Bsdc1_chr4_129461581_129488498(+)_transcript=ENSMUST00000048162.9	Bsdc1	2823	2623.99	12.9872	0	0	Up	spliced
Bsg_chr10_79704491_79711969(+)_transcript=ENSMUST00000105381.4	Bsg	1240	1040.99	255.999	0.0191952	-0.0115018	No Change High Expression	spliced
Bsn_chr9_108096022_108190384(-)_transcript=ENSMUST00000035208.13	Bsn	15938	15739	0.185916	0	0	No Change Low Expression	spliced
Bspry_chr4_62480053_62497298(+)_transcript=ENSMUST00000107449.3	Bspry	2167	1967.99	7.60136	0	0	No Change Medium Expression	spliced
Bst2_chr8_71534255_71537456(-)_transcript=ENSMUST00000051672.8	Bst2	792	592.994	65.9071	0	0	No Change High Expression	spliced
Btaf1_chr19_36926079_37012752(+)_transcript=ENSMUST00000099494.3	Btaf1	7204	7004.99	35.7402	1.41157	0.505387	Down	spliced
Btbd1_chr7_81792074_81829431(-)_transcript=ENSMUST00000026093.8	Btbd1	3001	2801.99	21.6609	0	0	No Change High Expression	spliced
Btbd10_chr7_113315626_113369392(-)_transcript=ENSMUST00000047091.13	Btbd10	2581	2381.99	10.2845	0	0	No Change Medium Expression	spliced
Btbd11_chr10_85386814_85660292(+)_transcript=ENSMUST00000105307.7	Btbd11	5788	5588.99	3.36732	0.249538	0.050007	Down	spliced
Btbd17_chr11_114791217_114795945(-)_transcript=ENSMUST00000000206.3	Btbd17	1717	1517.99	0.320467	0	0	No Change Low Expression	spliced
Btbd18_chr2_84659079_84668780(+)_transcript=ENSMUST00000133437.2	Btbd18	3052	2852.99	0.803875	0	0	No Change Low Expression	spliced
Btbd19_chr4_117119219_117125725(-)_transcript=ENSMUST00000183310.1	Btbd19	1620	1420.99	6.65199	0	0	No Change Medium Expression	spliced
Btbd2_chr10_80642617_80657071(-)_transcript=ENSMUST00000126980.7	Btbd2	2449	2249.99	28.4044	0	0	No Change High Expression	spliced
Btbd3_chr2_138256565_138589292(+)_transcript=ENSMUST00000091556.11	Btbd3	4657	4457.99	6.79245	0	0	No Change Medium Expression	spliced
Btbd6_chr12_112976482_112978945(+)_transcript=ENSMUST00000221104.1	Btbd6	2085	1885.99	7.15788	0	0	No Change Medium Expression	spliced
Btbd7_chr12_102780797_102878471(-)_transcript=ENSMUST00000223554.1	Btbd7	8157	7957.99	12.7275	0	0	No Change Medium Expression	spliced
Btbd8_chr5_107437997_107511207(+)_transcript=ENSMUST00000211896.1	Btbd8	5256	5056.99	2.26331	0.0681382	0.0681382	No Change Medium Expression	spliced
Btbd9_chr17_30215524_30576488(-)_transcript=ENSMUST00000236799.1	Btbd9	1272	1072.99	10.7701	0	0	No Change Medium Expression	spliced
Btd_chr14_31641028_31668579(+)_transcript=ENSMUST00000090147.6	Btd	2324	2124.99	2.77865	0	0	No Change Medium Expression	spliced
Btf3_chr13_98309896_98317006(-)_transcript=ENSMUST00000152704.7	Btf3	888	688.994	629.309	0	0	No Change High Expression	spliced
Btf3l4_chr4_108814295_108833614(-)_transcript=ENSMUST00000102740.7	Btf3l4	624	424.994	35.6566	0	0	No Change High Expression	spliced
Btg1_chr10_96617006_96622809(+)_transcript=ENSMUST00000038377.8	Btg1	5001	4801.99	14.1788	2.18826	1.23665	No Change Medium Expression	spliced
Btg2_chr1_134075170_134079120(-)_transcript=ENSMUST00000020692.6	Btg2	2743	2543.99	21.5797	0	0	No Change High Expression	spliced
Btg3_chr16_78332637_78377192(-)_transcript=ENSMUST00000023570.13	Btg3	1414	1214.99	17.3547	0	0	No Change High Expression	spliced
Btla_chr16_45224315_45257670(+)_transcript=ENSMUST00000102802.9	Btla	3251	3051.99	0.596954	0	0	No Change Low Expression	spliced
Btn1a1_chr13_23456992_23465901(-)_transcript=ENSMUST00000041674.13	Btn1a1	3423	3223.99	2.29272	0	0	No Change Medium Expression	spliced
Btn2a2_chr13_23477676_23488857(-)_transcript=ENSMUST00000041541.10	Btn2a2	2226	2026.99	0.275361	0	0	No Change Low Expression	spliced
Btnl7-ps_chr17_34532877_34547651(-)_transcript=ENSMUST00000023469.7	Btnl7-ps	1763	1563.99	1.41489	0	0	Up	spliced
Btrc_chr19_45363734_45530013(+)_transcript=ENSMUST00000224478.1	Btrc	2194	1994.99	18.9597	1.26892e-07	1.26892e-07	No Change High Expression	spliced
Bub1_chr2_127801122_127831865(-)_transcript=ENSMUST00000028858.7	Bub1	3421	3221.99	83.1038	0	0	No Change High Expression	spliced
Bub1b_chr2_118598211_118641591(+)_transcript=ENSMUST00000038341.7	Bub1b	3668	3468.99	78.7373	0.0191952	0.0191952	No Change High Expression	spliced
Bub3_chr7_131560222_131571895(+)_transcript=ENSMUST00000084502.6	Bub3	2218	2018.99	57.6648	0	0	No Change High Expression	spliced
Bud13_chr9_46283008_46299110(+)_transcript=ENSMUST00000074957.4	Bud13	2539	2339.99	13.8533	0	0	No Change Medium Expression	spliced
Bud23_chr5_135052957_135064959(-)_transcript=ENSMUST00000085984.10	Bud23	1516	1316.99	19.7474	0	0	No Change High Expression	spliced
Bud31_chr5_145140362_145148078(+)_transcript=ENSMUST00000162594.7	Bud31	867	667.994	27.1985	0	0	No Change High Expression	spliced
Bves_chr10_45335772_45372479(+)_transcript=ENSMUST00000095715.4	Bves	4368	4168.99	0.255917	0	0	No Change Low Expression	spliced
Bvht_chr18_61639542_61647472(+)_transcript=ENSMUST00000183087.1	Bvht	588	388.994	10.8345	0	0	No Change Medium Expression	spliced
Bysl_chr17_47599331_47611492(-)_transcript=ENSMUST00000024783.8	Bysl	3854	3654.99	23.4404	0.623845	-0.575965	No Change High Expression	spliced
Bzw1_chr1_58392898_58407353(+)_transcript=ENSMUST00000050552.14	Bzw1	3876	3676.99	139.469	0	0	Down	spliced
Bzw2_chr12_36091835_36158080(-)_transcript=ENSMUST00000020856.5	Bzw2	1871	1671.99	74.5076	2.60366	-0.40362	No Change High Expression	spliced
C030006K11Rik_chr15_76721465_76723845(-)_transcript=ENSMUST00000036247.9	C030006K11Rik	1754	1554.99	2.12442	0	0	No Change Medium Expression	spliced
C030017G13Rik_chr5_65680014_65682344(-)_transcript=ENSMUST00000202959.1	C030017G13Rik	2331	2131.99	1.18864	0	0	Down	spliced
C030034I22Rik_chr17_69417402_69421632(+)_transcript=ENSMUST00000188481.1	C030034I22Rik	4231	4031.99	0.278284	0	0	No Change Low Expression	spliced
C030037D09Rik_chr11_88718645_88728893(+)_transcript=ENSMUST00000138007.1	C030037D09Rik	3220	3020.99	0.381188	0	0	No Change Low Expression	spliced
C130013H08Rik_chr3_110250015_110253706(+)_transcript=ENSMUST00000197569.1	C130013H08Rik	3692	3492.99	0.260867	0	0	No Change Low Expression	spliced
C130021I20Rik_chr2_33641193_33646354(+)_transcript=ENSMUST00000147294.2	C130021I20Rik	3693	3493.99	0.144801	0	0	No Change Low Expression	spliced
C130040N14Rik_chr17_27565112_27566222(+)_transcript=ENSMUST00000231648.1	C130040N14Rik	1111	911.994	1.63495	0	0	No Change Medium Expression	spliced
C130071C03Rik_chr13_83721381_83884194(+)_transcript=ENSMUST00000131907.8	C130071C03Rik	3590	3390.99	0.269581	0.402519	0.387171	No Change Low Expression	spliced
C130073F10Rik_chr4_101890020_101893789(-)_transcript=ENSMUST00000051043.3	C130073F10Rik	913	713.994	1.00475	0	0	No Change Medium Expression	spliced
C130074G19Rik_chr1_184871926_184883218(-)_transcript=ENSMUST00000048308.5	C130074G19Rik	3035	2835.99	4.26661	0	0	No Change Medium Expression	spliced
C130075A20Rik_chr3_53099000_53103175(+)_transcript=ENSMUST00000198178.1	C130075A20Rik	4176	3976.99	0.234753	0.43884	0.434824	No Change Low Expression	spliced
C130083A15Rik_chr7_73527266_73528725(-)_transcript=ENSMUST00000205707.1	C130083A15Rik	1460	1260.99	0.434117	0	0	No Change Low Expression	spliced
C130089K02Rik_chr3_52057285_52064244(-)_transcript=ENSMUST00000194534.1	C130089K02Rik	6960	6760.99	0.603295	0.260085	0.131473	No Change Low Expression	spliced
C1d_chr11_17257579_17269176(+)_transcript=ENSMUST00000000594.8	C1d	2981	2781.99	7.98227	0	0	No Change Medium Expression	spliced
C1galt1_chr6_7844842_7875687(+)_transcript=ENSMUST00000040159.5	C1galt1	6092	5892.99	8.23195	0.0881112	-0.234208	No Change Medium Expression	spliced
C1galt1c1_chrX_38630785_38635087(-)_transcript=ENSMUST00000058265.7	C1galt1c1	1449	1249.99	4.47215	2.7427	2.12989	No Change Medium Expression	spliced
C1qbp_chr11_70977836_70983026(-)_transcript=ENSMUST00000078528.6	C1qbp	1175	975.994	235.744	0	0	Up	spliced
C1ql1_chr11_102939264_102946688(-)_transcript=ENSMUST00000057849.5	C1ql1	1473	1273.99	1.39174	0	0	No Change Medium Expression	spliced
C1qtnf1_chr11_118428203_118449963(+)_transcript=ENSMUST00000106286.2	C1qtnf1	2512	2312.99	1.27757	0	0	No Change Medium Expression	spliced
C1qtnf12_chr4_155962318_155966629(+)_transcript=ENSMUST00000024338.4	C1qtnf12	1315	1115.99	6.3057	0.0191952	-0.0268504	No Change Medium Expression	spliced
C1qtnf4_chr2_90885860_90890525(+)_transcript=ENSMUST00000111466.2	C1qtnf4	1290	1090.99	0.788007	0	0	No Change Low Expression	spliced
C1qtnf6_chr15_78523346_78531416(-)_transcript=ENSMUST00000023075.8	C1qtnf6	2402	2202.99	2.9577	0	0	No Change Medium Expression	spliced
C1qtnf9_chr14_60768134_60780869(+)_transcript=ENSMUST00000025940.6	C1qtnf9	1903	1703.99	0.337731	0	0	No Change Low Expression	spliced
C1rl_chr6_124493113_124510643(+)_transcript=ENSMUST00000049124.9	C1rl	3010	2810.99	0.311926	0	0	No Change Low Expression	spliced
C1s1_chr6_124530345_124542359(-)_transcript=ENSMUST00000162443.7	C1s1	2906	2706.99	0.560844	0	0	No Change Low Expression	spliced
C2_chr17_34862604_34898265(-)_transcript=ENSMUST00000025230.14	C2	2641	2441.99	1.19787	0	0	No Change Medium Expression	spliced
C230013L11Rik_chr17_28174657_28177682(-)_transcript=ENSMUST00000233181.1	C230013L11Rik	3026	2826.99	0.41023	0	0	No Change Low Expression	spliced
C230031I18Rik_chr3_127180276_127183973(-)_transcript=ENSMUST00000197856.1	C230031I18Rik	3698	3498.99	0.321318	0	0	No Change Low Expression	spliced
C230037L18Rik_chr15_89476236_89484847(+)_transcript=ENSMUST00000136218.1	C230037L18Rik	1886	1686.99	0.829376	0.356912	0.195828	No Change Low Expression	spliced
C230053D17Rik_chr9_121319385_121321630(+)_transcript=ENSMUST00000214451.1	C230053D17Rik	2246	2046.99	0.423784	0	0	No Change Low Expression	spliced
C230062I16Rik_chr7_29953621_29970352(+)_transcript=ENSMUST00000238888.1	C230062I16Rik	1648	1448.99	0.558969	1.36286	1.22472	No Change Low Expression	spliced
C230085N15Rik_chr17_51757295_51761621(-)_transcript=ENSMUST00000194893.1	C230085N15Rik	4327	4127.99	0.167192	0	0	No Change Low Expression	spliced
C230096K16Rik_chr5_64804014_64805735(+)_transcript=ENSMUST00000198074.1	C230096K16Rik	1722	1522.99	0.60281	0	0	No Change Low Expression	spliced
C2cd2_chr16_97855209_97962598(-)_transcript=ENSMUST00000170757.2	C2cd2	6556	6356.99	1.4457	0.00960807	0.00960807	No Change Medium Expression	spliced
C2cd2l_chr9_44309237_44320285(-)_transcript=ENSMUST00000065080.9	C2cd2l	4337	4137.99	1.32763	0	0	No Change Medium Expression	spliced
C2cd3_chr7_100372233_100470152(+)_transcript=ENSMUST00000051777.14	C2cd3	7803	7603.99	10.514	0	0	No Change Medium Expression	spliced
C2cd4c_chr10_79606854_79614025(-)_transcript=ENSMUST00000178228.2	C2cd4c	2761	2561.99	0.186616	0	0	No Change Low Expression	spliced
C2cd5_chr6_143010920_143100141(-)_transcript=ENSMUST00000171349.7	C2cd5	4292	4092.99	15.5135	0	0	No Change Medium Expression	spliced
C330002G04Rik_chr19_22978230_23075924(-)_transcript=ENSMUST00000181623.2	C330002G04Rik	2057	1857.99	2.23784	2.8205	1.64048	No Change Medium Expression	spliced
C330004P14Rik_chr10_15791777_15807065(+)_transcript=ENSMUST00000218833.1	C330004P14Rik	628	428.994	2.11011	0.0575857	-0.0038084	No Change Medium Expression	spliced
C330007P06Rik_chrX_36823737_36874111(-)_transcript=ENSMUST00000115248.9	C330007P06Rik	3340	3140.99	9.91986	0	0	No Change Medium Expression	spliced
C330011M18Rik_chr8_84065236_84067287(-)_transcript=ENSMUST00000071067.3	C330011M18Rik	1849	1649.99	0.137756	0.284008	-0.145751	No Change Low Expression	spliced
C330018A13Rik_chr5_116123614_116129110(+)_transcript=ENSMUST00000127792.1	C330018A13Rik	1599	1399.99	0.3671	0	0	No Change Low Expression	spliced
C330018D20Rik_chr18_56955833_56975368(-)_transcript=ENSMUST00000025488.14	C330018D20Rik	2400	2200.99	1.92497	0	0	No Change Medium Expression	spliced
C330022B21Rik_chr13_66340586_66342935(-)_transcript=ENSMUST00000224620.1	C330022B21Rik	2350	2150.99	2.03118	0	0	No Change Medium Expression	spliced
C330024D21Rik_chr5_67463897_67477632(+)_transcript=ENSMUST00000202828.1	C330024D21Rik	1714	1514.99	0.133327	0	0	No Change Low Expression	spliced
C430049B03Rik_chrX_53055046_53057190(-)_transcript=ENSMUST00000129764.7	C430049B03Rik	868	668.994	0.742085	0	0	No Change Low Expression	spliced
C4a_chr17_34809092_34823464(-)_transcript=ENSMUST00000160679.7	C4a	5371	5171.99	0.442433	0	0	No Change Low Expression	spliced
C4b_chr17_34728380_34743882(-)_transcript=ENSMUST00000069507.8	C4b	5379	5179.99	0.175101	0	0	No Change Low Expression	spliced
C530005A16Rik_chr4_116589733_116597630(-)_transcript=ENSMUST00000142815.1	C530005A16Rik	2436	2236.99	0.337778	0	0	No Change Low Expression	spliced
C530008M17Rik_chr5_76656512_76873554(+)_transcript=ENSMUST00000121160.7	C530008M17Rik	6921	6721.99	2.88529	0.271419	-0.098835	Down	spliced
C530043K16Rik_chr5_66592462_66595570(-)_transcript=ENSMUST00000201865.1	C530043K16Rik	3109	2909.99	0.177505	0	0	No Change Low Expression	spliced
C630043F03Rik_chr4_72201348_72215352(+)_transcript=ENSMUST00000122923.1	C630043F03Rik	2581	2381.99	0.218547	0	0	No Change Low Expression	spliced
C7_chr15_4988762_5063740(-)_transcript=ENSMUST00000110689.4	C7	2676	2476.99	0.252011	0	0	No Change Low Expression	spliced
C730034F03Rik_chr15_89429589_89430868(+)_transcript=ENSMUST00000168646.1	C730034F03Rik	1280	1080.99	0.38327	0	0	No Change Low Expression	spliced
C730045M19Rik_chr5_115039770_115041084(+)_transcript=ENSMUST00000201944.1	C730045M19Rik	1315	1115.99	0.460919	0	0	No Change Low Expression	spliced
C77080_chr4_129219578_129261404(-)_transcript=ENSMUST00000097873.9	C77080	5033	4833.99	18.5712	0	0	No Change High Expression	spliced
C78283_chr5_73946381_73948376(+)_transcript=ENSMUST00000202711.1	C78283	848	648.994	0.804783	0.19012	0.05494	No Change Low Expression	spliced
C78859_chr8_94322158_94328100(+)_transcript=ENSMUST00000212800.1	C78859	5943	5743.99	0.266797	0	0	No Change Low Expression	spliced
C87436_chr6_86438374_86473500(+)_transcript=ENSMUST00000113698.7	C87436	2922	2722.99	2.91393	1.3392	1.01756	No Change Medium Expression	spliced
C8g_chr2_25498651_25501719(-)_transcript=ENSMUST00000040042.10	C8g	1150	950.994	1.09648	0	0	No Change Medium Expression	spliced
C920009B18Rik_chr10_22306702_22321765(+)_transcript=ENSMUST00000181643.7	C920009B18Rik	1004	804.994	0.317337	0	0	No Change Low Expression	spliced
C9orf72_chr4_35191285_35226175(-)_transcript=ENSMUST00000108127.3	C9orf72	3193	2993.99	6.70648	0	0	No Change Medium Expression	spliced
Caap1_chr4_94500081_94556796(-)_transcript=ENSMUST00000030313.8	Caap1	2107	1907.99	8.88185	0.172757	0.040447	No Change Medium Expression	spliced
Cab39_chr1_85793441_85851576(+)_transcript=ENSMUST00000113360.7	Cab39	3805	3605.99	33.2065	0.0482019	0.0482019	No Change High Expression	spliced
Cab39l_chr14_59440972_59585764(+)_transcript=ENSMUST00000022553.5	Cab39l	3037	2837.99	10.2797	0	0	No Change Medium Expression	spliced
Cabin1_chr10_75646112_75764341(-)_transcript=ENSMUST00000001712.7	Cabin1	7417	7217.99	20.9266	0	-0.0297591	No Change High Expression	spliced
Cables1_chr18_11839220_11945630(+)_transcript=ENSMUST00000171109.8	Cables1	3396	3196.99	3.87385	0.153562	-0.03062	No Change Medium Expression	spliced
Cables2_chr2_180258540_180273496(-)_transcript=ENSMUST00000108891.1	Cables2	2975	2775.99	5.44764	0.20155	0.186202	No Change Medium Expression	spliced
Cabp1_chr5_115168689_115194381(-)_transcript=ENSMUST00000031519.13	Cabp1	1370	1170.99	3.05228	0	0	No Change Medium Expression	spliced
Cabp4_chr19_4135423_4144033(-)_transcript=ENSMUST00000025761.7	Cabp4	1433	1233.99	0.674486	0	0	No Change Low Expression	spliced
Cabp5_chr7_13398132_13408887(+)_transcript=ENSMUST00000005791.13	Cabp5	1777	1577.99	0.308458	0	0	No Change Low Expression	spliced
Cabp7_chr11_4736892_4746778(-)_transcript=ENSMUST00000009219.2	Cabp7	2628	2428.99	2.61756	0	0	No Change Medium Expression	spliced
Cabs1_chr5_87979439_87981544(+)_transcript=ENSMUST00000008051.4	Cabs1	1505	1305.99	0.309247	0	0	No Change Low Expression	spliced
Cacfd1_chr2_27009926_27021089(+)_transcript=ENSMUST00000114007.7	Cacfd1	2689	2489.99	3.13305	0	0	No Change Medium Expression	spliced
Cachd1_chr4_100776675_101029220(+)_transcript=ENSMUST00000030257.14	Cachd1	5765	5565.99	7.16663	0	0	Down	spliced
Cacna1a_chr8_84338639_84640246(+)_transcript=ENSMUST00000121390.7	Cacna1a	7926	7726.99	15.4064	12.2394	4.05583	No Change Medium Expression	spliced
Cacna1b_chr2_24603887_24763152(-)_transcript=ENSMUST00000100348.9	Cacna1b	7182	6982.99	1.74621	0	0	No Change Medium Expression	spliced
Cacna1g_chr11_94408391_94474198(-)_transcript=ENSMUST00000107790.7	Cacna1g	8035	7835.99	1.4972	0	0	No Change Medium Expression	spliced
Cacna1h_chr17_25374285_25433783(-)_transcript=ENSMUST00000078496.11	Cacna1h	8220	8020.99	0.749488	0.000723854	-0.000168947	No Change Low Expression	spliced
Cacna2d1_chr5_15934691_16374511(+)_transcript=ENSMUST00000078272.12	Cacna2d1	7311	7111.99	1.92775	0	0	No Change Medium Expression	spliced
Cacna2d2_chr9_107399612_107529343(+)_transcript=ENSMUST00000170737.2	Cacna2d2	5332	5132.99	0.981079	0	0	No Change Low Expression	spliced
Cacnb1_chr11_98001508_98023034(-)_transcript=ENSMUST00000017552.12	Cacnb1	3396	3196.99	1.61163	0	0	No Change Medium Expression	spliced
Cacnb2_chr2_14603088_14987908(+)_transcript=ENSMUST00000114723.8	Cacnb2	3945	3745.99	0.480831	0	0	No Change Low Expression	spliced
Cacnb3_chr15_98630840_98644529(+)_transcript=ENSMUST00000230490.1	Cacnb3	2477	2277.99	14.0902	0	0	No Change Medium Expression	spliced
Cacng4_chr11_107732357_107794557(-)_transcript=ENSMUST00000021066.3	Cacng4	3500	3300.99	0.661446	0	0	No Change Low Expression	spliced
Cacng6_chr7_3424195_3435667(+)_transcript=ENSMUST00000183200.7	Cacng6	1977	1777.99	5.73554	0	0	No Change Medium Expression	spliced
[truncated: 15,659 more rows]

## Sheet: 2_Unspliced_SAFB_IP
gene_ID	Gene_Identifier	length	eff_length	total_tpm	safb1_rpm	safb1_rpm_over_ctrl	Reg	Category
Xkr4_chr1_3205901_3671498(-)_transcript=unspliced(-)	Xkr4	465598	465399	0.640682	19.5774	17.7991	No Change Low Expression	unspliced
Gm38148_chr1_3592892_3595903(-)_transcript=unspliced(-)	Gm38148	3012	2812.99	0.29475	0	0	No Change Low Expression	unspliced
Gm37381_chr1_3905739_3986215(-)_transcript=unspliced(-)	Gm37381	80477	80278	0.0775554	0.292946	0.261786	No Change Medium Expression	unspliced
Gm7357_chr1_4522905_4526737(+)_transcript=unspliced(+)	Gm7357	3833	3633.99	0	0	0	No Change Low Expression	unspliced
Gm37323_chr1_4583129_4586252(-)_transcript=unspliced(-)	Gm37323	3124	2924.99	0	0	0	No Change Low Expression	unspliced
Gm6085_chr1_4687934_4689403(-)_transcript=unspliced(-)	Gm6085	1470	1270.99	2.55885	0	0	No Change Medium Expression	unspliced
Gm6119_chr1_4692219_4693424(-)_transcript=unspliced(-)	Gm6119	1206	1006.99	0.764199	0	0	No Change Low Expression	unspliced
Gm2053_chr1_4735046_4735676(-)_transcript=unspliced(-)	Gm2053	631	431.994	1.15053	0.23994	0.163197	No Change Medium Expression	unspliced
Gm6123_chr1_4771131_4772199(+)_transcript=unspliced(+)	Gm6123	1069	869.994	1.38026	0	0	No Change Medium Expression	unspliced
Mrpl15_chr1_4773206_4785739(-)_transcript=unspliced(-)	Mrpl15	12534	12335	5.17734	4.77415	3.16839	No Change High Expression	unspliced
Gm37144_chr1_4778063_4779212(-)_transcript=unspliced(-)	Gm37144	1150	950.994	0.706675	0	0	No Change Low Expression	unspliced
Lypla1_chr1_4807788_4848410(+)_transcript=unspliced(+)	Lypla1	40623	40424	2.81845	8.65063	6.43255	No Change High Expression	unspliced
Tcea1_chr1_4857814_4897909(+)_transcript=unspliced(+)	Tcea1	40096	39897	5.33307	0	0	No Change High Expression	unspliced
Gm37277_chr1_4905751_4906861(-)_transcript=unspliced(-)	Gm37277	1111	911.994	0.272492	0	0	No Change Low Expression	unspliced
Rgs20_chr1_4909576_5070285(-)_transcript=unspliced(-)	Rgs20	160710	160511	0.551154	1.84747	1.55299	No Change Medium Expression	unspliced
Atp6v1h_chr1_5070018_5162529(+)_transcript=unspliced(+)	Atp6v1h	92512	92313	2.39639	0.746476	0.499142	No Change High Expression	unspliced
Gm37567_chr1_5307739_5310017(+)_transcript=unspliced(+)	Gm37567	2279	2079.99	1.00337	0.197775	0.146158	No Change Medium Expression	unspliced
Rb1cc1_chr1_6206197_6276648(+)_transcript=unspliced(+)	Rb1cc1	70452	70253	1.96702	9.46592	7.2055	No Change Medium Expression	unspliced
4732440D04Rik_chr1_6209866_6215293(-)_transcript=unspliced(-)	4732440D04Rik	5428	5228.99	0.412063	1.29093	0.946856	No Change Low Expression	unspliced
Gm37108_chr1_6916559_6923588(+)_transcript=unspliced(+)	Gm37108	7030	6830.99	0.847911	0	0	No Change Medium Expression	unspliced
Pcmtd1_chr1_7088920_7173628(+)_transcript=unspliced(+)	Pcmtd1	84709	84510	5.74654	0.0306777	0.0306777	No Change High Expression	unspliced
Gm38372_chr1_7148110_7152137(+)_transcript=unspliced(+)	Gm38372	4028	3828.99	2.9659	0	0	No Change Medium Expression	unspliced
Gm9826_chr1_7177739_7179037(+)_transcript=unspliced(+)	Gm9826	1299	1099.99	0.223406	0	0	No Change Low Expression	unspliced
Gm15452_chr1_8791923_8792162(-)_transcript=unspliced(-)	Gm15452	240	59.1568	42.9621	0	0	No Change High Expression	unspliced
Gm6187_chr1_9396773_9398687(-)_transcript=unspliced(-)	Gm6187	1915	1715.99	0	0	0	No Change Low Expression	unspliced
Rrs1_chr1_9545408_9547455(+)_transcript=unspliced(+)	Rrs1	2048	1848.99	20.4866	0	0	No Change High Expression	unspliced
Adhfe1_chr1_9547948_9580673(+)_transcript=unspliced(+)	Adhfe1	32726	32527	0.366391	0.248407	0.072198	No Change Low Expression	unspliced
Gm6161_chr1_9574548_9575649(+)_transcript=unspliced(+)	Gm6161	1102	902.994	0.462445	0	0	No Change Low Expression	unspliced
Mybl1_chr1_9667415_9700209(-)_transcript=unspliced(-)	Mybl1	32795	32596	2.31238	0.00960135	0.00960135	No Change Medium Expression	unspliced
Vcpip1_chr1_9718622_9748382(-)_transcript=unspliced(-)	Vcpip1	29761	29562	1.49906	0.0139806	0.0139806	No Change Medium Expression	unspliced
1700034P13Rik_chr1_9747648_9791924(+)_transcript=unspliced(+)	1700034P13Rik	44277	44078	0.100825	0	0	No Change Low Expression	unspliced
Sgk3_chr1_9798107_9900845(+)_transcript=unspliced(+)	Sgk3	102739	102540	0.554891	2.51521	1.97677	No Change Medium Expression	unspliced
Mcmdc2_chr1_9908638_9942085(+)_transcript=unspliced(+)	Mcmdc2	33448	33249	0.382325	0	0	No Change Low Expression	unspliced
Snhg6_chr1_9941959_9944118(-)_transcript=unspliced(-)	Snhg6	2160	1960.99	22.5629	0	0	No Change High Expression	unspliced
Tcf24_chr1_9960163_9967932(-)_transcript=unspliced(-)	Tcf24	7770	7570.99	0.162126	0	0	No Change Low Expression	unspliced
Cops5_chr1_10024601_10038168(-)_transcript=unspliced(-)	Cops5	13568	13369	3.75276	0	0	No Change High Expression	unspliced
Cspp1_chr1_10037987_10136768(+)_transcript=unspliced(+)	Cspp1	98782	98583	4.20142	2.12823	1.79968	No Change High Expression	unspliced
Arfgef1_chr1_10137571_10232670(-)_transcript=unspliced(-)	Arfgef1	95100	94901	2.44179	17.0984	12.1046	No Change High Expression	unspliced
Gm15604_chr1_10554098_10555553(-)_transcript=unspliced(-)	Gm15604	1456	1256.99	0.817474	0	0	No Change Low Expression	unspliced
Gm28659_chr1_10868688_10869446(+)_transcript=unspliced(+)	Gm28659	759	559.994	0.746432	0	0	No Change Low Expression	unspliced
Prex2_chr1_10993465_11303681(+)_transcript=unspliced(+)	Prex2	310217	310018	0.576245	4.51856	3.68502	No Change Medium Expression	unspliced
A830018L16Rik_chr1_11414105_11975901(+)_transcript=unspliced(+)	A830018L16Rik	561797	561598	0.341493	6.35651	5.65263	No Change Medium Expression	unspliced
Gm38178_chr1_11416918_11419388(+)_transcript=unspliced(+)	Gm38178	2471	2271.99	0.686064	0	0	No Change Low Expression	unspliced
Gm2383_chr1_12565577_12566383(+)_transcript=unspliced(+)	Gm2383	807	607.994	0.50962	0	0	No Change Low Expression	unspliced
Sulf1_chr1_12692277_12861192(+)_transcript=unspliced(+)	Sulf1	168916	168717	4.74104	130.45	101.527	Down	unspliced
Slco5a1_chr1_12866549_12992650(-)_transcript=unspliced(-)	Slco5a1	126102	125903	0.292091	2.58398	2.10687	No Change Low Expression	unspliced
Prdm14_chr1_13113457_13127163(-)_transcript=unspliced(-)	Prdm14	13707	13508	1.85818	0	0	No Change Medium Expression	unspliced
Ncoa2_chr1_13139105_13374083(-)_transcript=unspliced(-)	Ncoa2	234979	234780	2.45523	17.0743	10.4221	No Change Medium Expression	unspliced
Gm37409_chr1_13234809_13236434(-)_transcript=unspliced(-)	Gm37409	1626	1426.99	0.397781	0	0	No Change Low Expression	unspliced
Gm38120_chr1_13343563_13348204(-)_transcript=unspliced(-)	Gm38120	4642	4442.99	0.618264	0	0	No Change Low Expression	unspliced
Gm38380_chr1_13354483_13356730(-)_transcript=unspliced(-)	Gm38380	2248	2048.99	0.816145	0	0	No Change Low Expression	unspliced
Tram1_chr1_13564698_13589910(-)_transcript=unspliced(-)	Tram1	25213	25014	2.38639	0	0	No Change High Expression	unspliced
Lactb2_chr1_13623330_13660546(-)_transcript=unspliced(-)	Lactb2	37217	37018	5.30514	0	0	No Change Medium Expression	unspliced
Gm38319_chr1_13641483_13642748(-)_transcript=unspliced(-)	Gm38319	1266	1066.99	2.00558	0	0	No Change Medium Expression	unspliced
Gm5523_chr1_13785883_13786879(-)_transcript=unspliced(-)	Gm5523	997	797.994	0.66434	0	0	No Change Low Expression	unspliced
Eya1_chr1_14168954_14310235(-)_transcript=unspliced(-)	Eya1	141282	141083	0.804498	7.21928	5.55074	No Change Medium Expression	unspliced
Gm9947_chr1_14752937_14776931(+)_transcript=unspliced(+)	Gm9947	23995	23796	0.286332	1.00782	0.817188	No Change Low Expression	unspliced
Msc_chr1_14753346_14755992(-)_transcript=unspliced(-)	Msc	2647	2447.99	3.60546	0	0	No Change Medium Expression	unspliced
Rpl5-ps1_chr1_14865072_14865965(+)_transcript=unspliced(+)	Rpl5-ps1	894	694.994	0.304218	0	0	No Change Low Expression	unspliced
Trpa1_chr1_14872648_14918862(-)_transcript=unspliced(-)	Trpa1	46215	46016	0.0626696	0	0	No Change Low Expression	unspliced
Gm10566_chr1_15268802_15269797(-)_transcript=unspliced(-)	Gm10566	996	796.994	1.52843	0	0	Up	unspliced
Terf1_chr1_15805646_15844052(+)_transcript=unspliced(+)	Terf1	38407	38208	6.95341	0	0	No Change High Expression	unspliced
Gm37509_chr1_15853331_15856499(+)_transcript=unspliced(+)	Gm37509	3169	2969.99	2.03606	0	0	No Change Medium Expression	unspliced
4930444P10Rik_chr1_16065979_16093325(-)_transcript=unspliced(-)	4930444P10Rik	27347	27148	0.275066	0.557199	0.557199	No Change Low Expression	unspliced
Rpl7_chr1_16101295_16104662(-)_transcript=unspliced(-)	Rpl7	3368	3168.99	15.8276	0	0	No Change High Expression	unspliced
Rdh10_chr1_16105774_16133734(+)_transcript=unspliced(+)	Rdh10	27961	27762	1.98314	0	0	No Change Medium Expression	unspliced
Stau2_chr1_16228674_16520112(-)_transcript=unspliced(-)	Stau2	291439	291240	0.61697	6.36383	5.64213	No Change Medium Expression	unspliced
Ube2w_chr1_16540790_16619489(-)_transcript=unspliced(-)	Ube2w	78700	78501	2.44877	0.0671918	0.0211462	No Change Medium Expression	unspliced
Eloc_chr1_16641725_16657042(-)_transcript=unspliced(-)	Eloc	15318	15119	5.42823	0.0191952	0.0191952	No Change High Expression	unspliced
Tmem70_chr1_16665207_16678275(+)_transcript=unspliced(+)	Tmem70	13069	12870	1.53018	0	0	No Change Medium Expression	unspliced
Gm5828_chr1_16768279_16770138(-)_transcript=unspliced(-)	Gm5828	1860	1660.99	0.5946	0	0	No Change Low Expression	unspliced
Jph1_chr1_16964560_17097889(-)_transcript=unspliced(-)	Jph1	133330	133131	2.25608	20.273	13.6615	No Change Medium Expression	unspliced
Gdap1_chr1_17145362_17164271(+)_transcript=unspliced(+)	Gdap1	18910	18711	0.0332947	0	0	No Change Low Expression	unspliced
Gm5251_chr1_17394958_17395429(+)_transcript=unspliced(+)	Gm5251	472	272.994	1.1063	0	0	No Change Medium Expression	unspliced
Rbm6-ps1_chr1_17397412_17400281(-)_transcript=unspliced(-)	Rbm6-ps1	2870	2670.99	0.543201	0.00969848	0.00969848	No Change Low Expression	unspliced
Crispld1_chr1_17727045_17766344(+)_transcript=unspliced(+)	Crispld1	39300	39101	0.31074	0	0	No Change Low Expression	unspliced
Gm17837_chr1_18262395_18263379(-)_transcript=unspliced(-)	Gm17837	985	785.994	0.211658	0	0	No Change Low Expression	unspliced
Gm10075_chr1_19153422_19153966(-)_transcript=unspliced(-)	Gm10075	545	345.994	0.79936	0	0	No Change Low Expression	unspliced
Pkhd1_chr1_20057779_20618064(-)_transcript=unspliced(-)	Pkhd1	560286	560087	0.260036	6.01614	4.88838	No Change Low Expression	unspliced
Il17f_chr1_20777146_20790617(-)_transcript=unspliced(-)	Il17f	13472	13273	0.537659	0	0	No Change Low Expression	unspliced
Mcm3_chr1_20802968_20820312(-)_transcript=unspliced(-)	Mcm3	17345	17146	7.10234	0.00959761	0.00959761	No Change High Expression	unspliced
Paqr8_chr1_20890606_20939650(+)_transcript=unspliced(+)	Paqr8	49045	48846	0.584331	0.383932	0.368584	No Change Medium Expression	unspliced
Efhc1_chr1_20951626_20990841(+)_transcript=unspliced(+)	Efhc1	39216	39017	0.0777475	0	0	No Change Low Expression	unspliced
Tram2_chr1_20996299_21079229(-)_transcript=unspliced(-)	Tram2	82931	82732	0.759364	0	0	No Change Medium Expression	unspliced
Tmem14a_chr1_21218575_21230167(+)_transcript=unspliced(+)	Tmem14a	11593	11394	0.285877	0	0	No Change Medium Expression	unspliced
Gsta3_chr1_21240589_21265661(+)_transcript=unspliced(+)	Gsta3	25073	24874	0.226047	0.294863	0.294863	No Change Medium Expression	unspliced
Gm28836_chr1_21250359_21271593(-)_transcript=unspliced(-)	Gm28836	21235	21036	0.434413	0	0	No Change Medium Expression	unspliced
Kcnq5_chr1_21398403_21961942(-)_transcript=unspliced(-)	Kcnq5	563540	563341	0.276933	11.8692	10.7035	No Change Low Expression	unspliced
Gm38243_chr1_21838948_21840514(-)_transcript=unspliced(-)	Gm38243	1567	1367.99	0.164781	0	0	No Change Low Expression	unspliced
Rims1_chr1_22286251_22805994(-)_transcript=unspliced(-)	Rims1	519744	519545	0.587901	8.04701	6.35761	No Change Medium Expression	unspliced
Ogfrl1_chr1_23366424_23397772(-)_transcript=unspliced(-)	Ogfrl1	31349	31150	0.364662	0	0	No Change Medium Expression	unspliced
Smap1_chr1_23844846_23922317(-)_transcript=unspliced(-)	Smap1	77472	77273	1.15259	0.464276	0.418056	No Change High Expression	unspliced
Sdhaf4_chr1_23995939_24005656(-)_transcript=unspliced(-)	Sdhaf4	9718	9518.99	0.293761	0	0	No Change Medium Expression	unspliced
Fam135a_chr1_24011093_24100341(-)_transcript=unspliced(-)	Fam135a	89249	89050	1.73456	4.13289	2.87118	No Change Medium Expression	unspliced
Gm28437_chr1_24613189_24613971(-)_transcript=unspliced(-)	Gm28437	783	583.994	2358.84	0	0	No Change High Expression	unspliced
Gm28661_chr1_24614885_24615565(-)_transcript=unspliced(-)	Gm28661	681	481.994	3884.65	0	0	No Change High Expression	unspliced
Lmbrd1_chr1_24678630_24766301(+)_transcript=unspliced(+)	Lmbrd1	87672	87473	1.34375	6.17045	4.67066	No Change Medium Expression	unspliced
Adgrb3_chr1_25067476_25829707(-)_transcript=unspliced(-)	Adgrb3	762232	762033	0.186306	8.77199	7.3712	No Change Low Expression	unspliced
8030445P17Rik_chr1_25722038_25724778(-)_transcript=unspliced(-)	8030445P17Rik	2741	2541.99	0.134958	0	0	No Change Low Expression	unspliced
Gm38198_chr1_25735389_25738969(-)_transcript=unspliced(-)	Gm38198	3581	3381.99	0.262003	0	0	No Change Low Expression	unspliced
Gm37077_chr1_25755343_25759033(-)_transcript=unspliced(-)	Gm37077	3691	3491.99	0.179651	0	0	No Change Low Expression	unspliced
Gm37895_chr1_25775757_25780306(-)_transcript=unspliced(-)	Gm37895	4550	4350.99	0.249542	0	0	No Change Low Expression	unspliced
Gm36952_chr1_25797281_25800905(-)_transcript=unspliced(-)	Gm36952	3625	3425.99	0.245352	0	0	No Change Low Expression	unspliced
Gm37602_chr1_25804097_25807406(-)_transcript=unspliced(-)	Gm37602	3310	3110.99	0.239686	0	0	No Change Low Expression	unspliced
2900022M07Rik_chr1_25808956_25809972(-)_transcript=unspliced(-)	2900022M07Rik	1017	817.994	0.425327	0.686314	0.602649	No Change Low Expression	unspliced
Gm7846_chr1_28580499_28580772(-)_transcript=unspliced(-)	Gm7846	274	82.047	2.11924	0	0	No Change Medium Expression	unspliced
Gm5525_chr1_29484604_29485915(-)_transcript=unspliced(-)	Gm5525	1312	1112.99	1.13765	0	0	No Change Medium Expression	unspliced
Phf3_chr1_30802339_30873921(-)_transcript=unspliced(-)	Phf3	71583	71384	7.59502	0	0	No Change High Expression	unspliced
Gm37906_chr1_30865504_30868538(-)_transcript=unspliced(-)	Gm37906	3035	2835.99	1.15344	0	0	No Change Medium Expression	unspliced
Ptp4a1_chr1_30940302_30949309(-)_transcript=unspliced(-)	Ptp4a1	9008	8808.99	5.84958	0	0	Down	unspliced
Gm19680_chr1_31615149_31616661(+)_transcript=unspliced(+)	Gm19680	1513	1313.99	4.3434	0	0	No Change Medium Expression	unspliced
Khdrbs2_chr1_32172714_32658568(+)_transcript=unspliced(+)	Khdrbs2	485855	485656	0.151891	0.892352	0.854934	No Change Low Expression	unspliced
Gm37110_chr1_32485315_32486942(+)_transcript=unspliced(+)	Gm37110	1628	1428.99	0.97046	0	0	No Change Low Expression	unspliced
Gm37911_chr1_32496444_32497988(+)_transcript=unspliced(+)	Gm37911	1545	1345.99	0.508716	0.0659467	0.0659467	No Change Low Expression	unspliced
Gm7114_chr1_33100907_33102695(+)_transcript=unspliced(+)	Gm7114	1789	1589.99	0.554788	0	0	No Change Low Expression	unspliced
Prim2_chr1_33453810_33669795(-)_transcript=unspliced(-)	Prim2	215986	215787	1.59147	29.3397	21.8557	No Change High Expression	unspliced
Gm29228_chr1_33482101_33482518(+)_transcript=unspliced(+)	Gm29228	418	218.995	0.860303	0	0	No Change Low Expression	unspliced
Gm37618_chr1_33613758_33616832(-)_transcript=unspliced(-)	Gm37618	3075	2875.99	0.918038	0	0	No Change Low Expression	unspliced
Rab23_chr1_33719887_33742564(+)_transcript=unspliced(+)	Rab23	22678	22479	3.34853	0	0	No Change Medium Expression	unspliced
Bag2_chr1_33745484_33757795(-)_transcript=unspliced(-)	Bag2	12312	12113	0.73101	0	0	No Change Medium Expression	unspliced
Zfp451_chr1_33761545_33814595(-)_transcript=unspliced(-)	Zfp451	53051	52852	3.44918	0.407639	0.347735	No Change High Expression	unspliced
Gm15455_chr1_33836124_33838680(-)_transcript=unspliced(-)	Gm15455	2557	2357.99	0.125078	0	0	No Change Low Expression	unspliced
Bend6_chr1_33852052_33907816(-)_transcript=unspliced(-)	Bend6	55765	55566	0.401236	4.76683	4.13664	No Change Medium Expression	unspliced
Gm37067_chr1_33889490_33891117(-)_transcript=unspliced(-)	Gm37067	1628	1428.99	0.132613	0.0346817	-0.0183418	No Change Low Expression	unspliced
Dst_chr1_33908225_34308661(+)_transcript=unspliced(+)	Dst	400437	400238	4.37618	87.0143	65.0231	No Change High Expression	unspliced
Gm37354_chr1_33922455_33924838(+)_transcript=unspliced(+)	Gm37354	2384	2184.99	0.162437	0.981385	0.427472	No Change Low Expression	unspliced
Gm38157_chr1_34032100_34033797(+)_transcript=unspliced(+)	Gm38157	1698	1498.99	0.776118	0	0	No Change Low Expression	unspliced
Gm26788_chr1_34165856_34178446(-)_transcript=unspliced(-)	Gm26788	12591	12392	0.283081	0	0	No Change Low Expression	unspliced
Gm37233_chr1_34427002_34433264(-)_transcript=unspliced(-)	Gm37233	6263	6063.99	0.232228	0.23994	0.193894	No Change Low Expression	unspliced
Ccdc115_chr1_34436670_34439672(-)_transcript=unspliced(-)	Ccdc115	3003	2803.99	0.712555	0	0	No Change Medium Expression	unspliced
Imp4_chr1_34439851_34449356(+)_transcript=unspliced(+)	Imp4	9506	9306.99	2.67529	0	0	No Change High Expression	unspliced
Ptpn18_chr1_34459762_34475733(+)_transcript=unspliced(+)	Ptpn18	15972	15773	0.549904	0	0	No Change Medium Expression	unspliced
Cfc1_chr1_34535648_34544313(+)_transcript=unspliced(+)	Cfc1	8666	8466.99	0.106416	0	0	No Change Low Expression	unspliced
Arhgef4_chr1_34678188_34813309(+)_transcript=unspliced(+)	Arhgef4	135122	134923	0.218122	4.05911	3.72096	No Change Medium Expression	unspliced
Gm38336_chr1_34809360_34811908(-)_transcript=unspliced(-)	Gm38336	2549	2349.99	0.652122	0	0	No Change Low Expression	unspliced
Fam168b_chr1_34813219_34843065(-)_transcript=unspliced(-)	Fam168b	29847	29648	4.09371	0	0	No Change High Expression	unspliced
Plekhb2_chr1_34849976_34879580(+)_transcript=unspliced(+)	Plekhb2	29605	29406	0.524192	1.23396	0.919875	No Change Medium Expression	unspliced
Gm33222_chr1_36002985_36011044(-)_transcript=unspliced(-)	Gm33222	8060	7860.99	0.234946	0	0	No Change Low Expression	unspliced
Hs6st1_chr1_36068400_36106446(+)_transcript=unspliced(+)	Hs6st1	38047	37848	10.6082	0.0288091	0.0134606	No Change High Expression	unspliced
Uggt1_chr1_36140027_36244720(-)_transcript=unspliced(-)	Uggt1	104694	104495	2.43959	14.8846	10.9636	No Change High Expression	unspliced
Arid5a_chr1_36307733_36324029(+)_transcript=unspliced(+)	Arid5a	16297	16098	0.541313	0	0	No Change Medium Expression	unspliced
Kansl3_chr1_36335730_36369181(-)_transcript=unspliced(-)	Kansl3	33452	33253	3.81339	0.00959761	-0.00575089	No Change Medium Expression	unspliced
Lman2l_chr1_36419871_36445271(-)_transcript=unspliced(-)	Lman2l	25401	25202	4.04773	8.1954	5.90847	No Change Medium Expression	unspliced
Cnnm4_chr1_36471620_36508764(+)_transcript=unspliced(+)	Cnnm4	37145	36946	0.389455	0.0191952	0.0191952	No Change Medium Expression	unspliced
Cnnm3_chr1_36511867_36528237(+)_transcript=unspliced(+)	Cnnm3	16371	16172	3.24765	0	0	No Change Medium Expression	unspliced
Ankrd23_chr1_36530188_36536883(-)_transcript=unspliced(-)	Ankrd23	6696	6496.99	0	0	0	No Change Medium Expression	unspliced
Ankrd39_chr1_36537507_36547445(-)_transcript=unspliced(-)	Ankrd39	9939	9739.99	0.738707	0	0	No Change Medium Expression	unspliced
Sema4c_chr1_36548639_36558349(-)_transcript=unspliced(-)	Sema4c	9711	9511.99	0.489692	0	0	No Change Medium Expression	unspliced
Fam178b_chr1_36562692_36683183(-)_transcript=unspliced(-)	Fam178b	120492	120293	1.33015	28.4118	20.2682	No Change Medium Expression	unspliced
Cox5b_chr1_36691449_36693681(+)_transcript=unspliced(+)	Cox5b	2233	2033.99	0.545159	0	0	No Change High Expression	unspliced
Actr1b_chr1_36698114_36714422(-)_transcript=unspliced(-)	Actr1b	16309	16110	1.57543	0	0	No Change High Expression	unspliced
Zap70_chr1_36761798_36782818(+)_transcript=unspliced(+)	Zap70	21021	20822	0.213666	0	0	No Change Medium Expression	unspliced
Tmem131_chr1_36792191_36943666(-)_transcript=unspliced(-)	Tmem131	151476	151277	5.3089	51.3506	34.6113	No Change High Expression	unspliced
Gm38115_chr1_36913601_36916539(-)_transcript=unspliced(-)	Gm38115	2939	2739.99	0.675515	0	0	No Change Medium Expression	unspliced
F830112A20Rik_chr1_36922797_36926348(-)_transcript=unspliced(-)	F830112A20Rik	3552	3352.99	1.23664	0	0	No Change Medium Expression	unspliced
Rpl12-ps1_chr1_36957930_36958427(-)_transcript=unspliced(-)	Rpl12-ps1	498	298.994	0.5425	0	0	No Change Low Expression	unspliced
Vwa3b_chr1_37026596_37187613(+)_transcript=unspliced(+)	Vwa3b	161018	160819	0.234054	2.57531	2.46614	No Change Low Expression	unspliced
Cnga3_chr1_37214434_37263384(+)_transcript=unspliced(+)	Cnga3	48951	48752	0.0510205	0	0	No Change Low Expression	unspliced
Inpp4a_chr1_37299865_37410736(+)_transcript=unspliced(+)	Inpp4a	110872	110673	0.687355	5.20021	3.98768	No Change Medium Expression	unspliced
Coa5_chr1_37417084_37430103(-)_transcript=unspliced(-)	Coa5	13020	12821	1.32244	0	0	No Change High Expression	unspliced
Unc50_chr1_37430139_37439124(+)_transcript=unspliced(+)	Unc50	8986	8786.99	2.25948	0	0	No Change Medium Expression	unspliced
Mgat4a_chr1_37439340_37541016(-)_transcript=unspliced(-)	Mgat4a	101677	101478	1.19555	0.208045	0.208045	No Change Medium Expression	unspliced
4930594C11Rik_chr1_37485851_37488605(-)_transcript=unspliced(-)	4930594C11Rik	2755	2555.99	0.956768	1.08428	0.807146	No Change Low Expression	unspliced
2010300C02Rik_chr1_37611677_37720085(-)_transcript=unspliced(-)	2010300C02Rik	108409	108210	0.0878	0.00963475	0.00963475	No Change Low Expression	unspliced
Tsga10_chr1_37754776_37866429(-)_transcript=unspliced(-)	Tsga10	111654	111455	0.17392	0.208337	0.208337	No Change Low Expression	unspliced
Lipt1_chr1_37871738_37876228(+)_transcript=unspliced(+)	Lipt1	4491	4291.99	0.716487	0.493328	0.427584	No Change Medium Expression	unspliced
Mitd1_chr1_37874801_37890411(-)_transcript=unspliced(-)	Mitd1	15611	15412	1.0056	0.393503	0.378155	No Change Medium Expression	unspliced
Mrpl30_chr1_37890477_37898535(+)_transcript=unspliced(+)	Mrpl30	8059	7859.99	1.76346	0	0	No Change High Expression	unspliced
Txndc9_chr1_37985189_37997893(-)_transcript=unspliced(-)	Txndc9	12705	12506	3.05793	0	0	No Change High Expression	unspliced
Eif5b_chr1_37998010_38055579(+)_transcript=unspliced(+)	Eif5b	57570	57371	2.8264	3.30379	2.26616	No Change High Expression	unspliced
Rev1_chr1_38052786_38129801(-)_transcript=unspliced(-)	Rev1	77016	76817	10.0721	56.1924	46.1184	No Change High Expression	unspliced
Aff3_chr1_38177326_38664955(-)_transcript=unspliced(-)	Aff3	487630	487431	1.5494	85.7906	68.549	No Change Medium Expression	unspliced
Chst10_chr1_38863867_38898161(-)_transcript=unspliced(-)	Chst10	34295	34096	0.588106	0.864129	0.756633	No Change Medium Expression	unspliced
Pdcl3_chr1_38985608_38997238(+)_transcript=unspliced(+)	Pdcl3	11631	11432	1.05661	0	0	No Change Medium Expression	unspliced
Gm37309_chr1_38992678_38994316(+)_transcript=unspliced(+)	Gm37309	1639	1439.99	0.449633	0	0	No Change Low Expression	unspliced
Rpl31_chr1_39367842_39371911(+)_transcript=unspliced(+)	Rpl31	4070	3870.99	17.5651	0	0	No Change High Expression	unspliced
Tbc1d8_chr1_39371492_39478755(-)_transcript=unspliced(-)	Tbc1d8	107264	107065	0.87757	0.392246	0.260275	No Change Medium Expression	unspliced
Cnot11_chr1_39534992_39546889(+)_transcript=unspliced(+)	Cnot11	11898	11699	2.07177	0	0	No Change High Expression	unspliced
Gm15832_chr1_39547570_39552002(-)_transcript=unspliced(-)	Gm15832	4433	4233.99	3.53266	0	0	No Change Low Expression	unspliced
Rnf149_chr1_39551296_39577405(-)_transcript=unspliced(-)	Rnf149	26110	25911	4.76833	0	0	No Change High Expression	unspliced
D930019O06Rik_chr1_39650176_39657390(+)_transcript=unspliced(+)	D930019O06Rik	7215	7015.99	0	0	0	No Change Low Expression	unspliced
Map4k4_chr1_39900913_40026310(+)_transcript=unspliced(+)	Map4k4	125398	125199	7.05925	16.2933	11.6902	No Change High Expression	unspliced
Il1r2_chr1_40074079_40125231(+)_transcript=unspliced(+)	Il1r2	51153	50954	0.0137094	0	0	No Change Low Expression	unspliced
Il1r1_chr1_40225080_40317257(+)_transcript=unspliced(+)	Il1r1	92178	91979	0.0276062	0.00994361	0.00994361	No Change Low Expression	unspliced
Il1rl2_chr1_40324610_40367562(+)_transcript=unspliced(+)	Il1rl2	42953	42754	0.0796155	0	0	No Change Low Expression	unspliced
Mfsd9_chr1_40772038_40790687(-)_transcript=unspliced(-)	Mfsd9	18650	18451	0.0646062	0	0	No Change Low Expression	unspliced
Mrps9_chr1_42851233_42905683(+)_transcript=unspliced(+)	Mrps9	54451	54252	3.78144	4.66562	3.38487	No Change High Expression	unspliced
Tgfbrap1_chr1_43047200_43098637(-)_transcript=unspliced(-)	Tgfbrap1	51438	51239	0.730433	0.438493	0.42153	No Change Medium Expression	unspliced
AI597479_chr1_43098710_43115947(+)_transcript=unspliced(+)	AI597479	17238	17039	1.09863	0	0	No Change Medium Expression	unspliced
Fhl2_chr1_43123074_43196984(-)_transcript=unspliced(-)	Fhl2	73911	73712	0.362859	2.3676	2.22835	No Change Medium Expression	unspliced
Gm8210_chr1_43189156_43189638(+)_transcript=unspliced(+)	Gm8210	483	283.994	0.36228	0	0	No Change Low Expression	unspliced
Nck2_chr1_43444579_43570515(+)_transcript=unspliced(+)	Nck2	125937	125738	2.5447	1.26334	0.84893	No Change Medium Expression	unspliced
Gm38228_chr1_43560273_43561565(+)_transcript=unspliced(+)	Gm38228	1293	1093.99	0.809941	0	0	No Change Low Expression	unspliced
Gm29156_chr1_43745784_43746282(-)_transcript=unspliced(-)	Gm29156	499	299.994	1.65677	0	0	No Change Medium Expression	unspliced
Uxs1_chr1_43746966_43827800(-)_transcript=unspliced(-)	Uxs1	80835	80636	2.37606	3.33812	2.55534	No Change Medium Expression	unspliced
Gm16103_chr1_43785910_43787188(+)_transcript=unspliced(+)	Gm16103	1279	1079.99	0.603633	0	0	No Change Low Expression	unspliced
Tpp2_chr1_43933647_44003000(+)_transcript=unspliced(+)	Tpp2	69354	69155	3.5543	0	-0.0153485	No Change High Expression	unspliced
Tex30_chr1_44086613_44102441(-)_transcript=unspliced(-)	Tex30	15829	15630	2.00945	0.00959761	0.00959761	No Change Medium Expression	unspliced
Poglut2_chr1_44106546_44118808(-)_transcript=unspliced(-)	Poglut2	12263	12064	1.5619	0	0	No Change Medium Expression	unspliced
Bivm_chr1_44118957_44144770(+)_transcript=unspliced(+)	Bivm	25814	25615	0.700315	0.096455	0.0350609	No Change Medium Expression	unspliced
Ercc5_chr1_44147744_44181260(+)_transcript=unspliced(+)	Ercc5	33517	33318	2.84887	0.470324	0.402513	No Change High Expression	unspliced
Txn-ps1_chr1_44463923_44464231(-)_transcript=unspliced(-)	Txn-ps1	309	111.833	2.76298	0	0	No Change Medium Expression	unspliced
Gulp1_chr1_44551511_44796838(+)_transcript=unspliced(+)	Gulp1	245328	245129	0.683666	14.505	11.5766	Down	unspliced
Gm37626_chr1_44560885_44565447(+)_transcript=unspliced(+)	Gm37626	4563	4363.99	0.244808	0	0	No Change Low Expression	unspliced
Gm16102_chr1_44644279_44644698(+)_transcript=unspliced(+)	Gm16102	420	220.995	3.21911	0	0	No Change Medium Expression	unspliced
Col3a1_chr1_45311538_45349706(+)_transcript=unspliced(+)	Col3a1	38169	37970	0.00221929	0	0	No Change Low Expression	unspliced
Col5a2_chr1_45374321_45503282(-)_transcript=unspliced(-)	Col5a2	128962	128763	0.118169	0.226653	0.226653	Down	unspliced
Wdr75_chr1_45795166_45823619(+)_transcript=unspliced(+)	Wdr75	28454	28255	4.20693	0	0	No Change High Expression	unspliced
Slc40a1_chr1_45908068_45926523(-)_transcript=unspliced(-)	Slc40a1	18456	18257	0.481014	0	0	Down	unspliced
Gm8326_chr1_46414502_46416932(+)_transcript=unspliced(+)	Gm8326	2431	2231.99	0	0	0	No Change Low Expression	unspliced
Slc39a10_chr1_46807544_46892852(-)_transcript=unspliced(-)	Slc39a10	85309	85110	1.21129	9.30009	7.19734	No Change High Expression	unspliced
Gm28151_chr1_46849529_46850479(-)_transcript=unspliced(-)	Gm28151	951	751.994	1.32209	0	0	No Change Medium Expression	unspliced
Gm8337_chr1_47657693_47659630(+)_transcript=unspliced(+)	Gm8337	1938	1738.99	0.834887	0	0	No Change Low Expression	unspliced
Tmeff2_chr1_50900647_51187270(+)_transcript=unspliced(+)	Tmeff2	286624	286425	0.0526766	0.0308007	0.015443	No Change Low Expression	unspliced
Nabp1_chr1_51465862_51478425(-)_transcript=unspliced(-)	Nabp1	12564	12365	2.85111	0.479881	0.372441	No Change High Expression	unspliced
Myo1b_chr1_51749765_51916071(-)_transcript=unspliced(-)	Myo1b	166307	166108	2.10208	2.41937	1.48034	No Change High Expression	unspliced
Gm8420_chr1_51940664_51941261(-)_transcript=unspliced(-)	Gm8420	598	398.994	9.70583	0	0	No Change Medium Expression	unspliced
Stat4_chr1_51987148_52107189(+)_transcript=unspliced(+)	Stat4	120042	119843	0.458329	4.26831	3.56147	No Change Medium Expression	unspliced
Stat1_chr1_52119440_52161865(+)_transcript=unspliced(+)	Stat1	42426	42227	0.279015	0.411218	0.349824	No Change Medium Expression	unspliced
Gls_chr1_52163448_52233232(-)_transcript=unspliced(-)	Gls	69785	69586	5.88635	0	0	Down	unspliced
Nab1_chr1_52457294_52500679(-)_transcript=unspliced(-)	Nab1	43386	43187	0.634536	0.489502	0.30532	No Change Medium Expression	unspliced
Nemp2_chr1_52630703_52651919(+)_transcript=unspliced(+)	Nemp2	21217	21018	3.28359	1.76596	1.12132	No Change Medium Expression	unspliced
Mfsd6_chr1_52656286_52727462(-)_transcript=unspliced(-)	Mfsd6	71177	70978	0.0768758	0.00959819	0.00959819	No Change Low Expression	unspliced
Inpp1_chr1_52785427_52817688(-)_transcript=unspliced(-)	Inpp1	32262	32063	0.230495	0.451088	0.420234	No Change Low Expression	unspliced
Hibch_chr1_52844929_52920986(+)_transcript=unspliced(+)	Hibch	76058	75859	0.645066	4.98072	3.86048	No Change Medium Expression	unspliced
1700019D03Rik_chr1_52922324_53020179(-)_transcript=unspliced(-)	1700019D03Rik	97856	97657	1.67329	2.32029	0.87575	No Change Medium Expression	unspliced
1700019A02Rik_chr1_53158577_53187636(-)_transcript=unspliced(-)	1700019A02Rik	29060	28861	1.47661	0.00962871	0.00962871	No Change Medium Expression	unspliced
Pms1_chr1_53189187_53297018(-)_transcript=unspliced(-)	Pms1	107832	107633	2.19977	13.092	10.468	No Change Medium Expression	unspliced
Ormdl1_chr1_53297095_53310309(+)_transcript=unspliced(+)	Ormdl1	13215	13016	0.0332922	0	0	No Change Medium Expression	unspliced
Osgepl1_chr1_53313624_53326343(+)_transcript=unspliced(+)	Osgepl1	12720	12521	1.53674	0	0	No Change Medium Expression	unspliced
Asnsd1_chr1_53344617_53352752(-)_transcript=unspliced(-)	Asnsd1	8136	7936.99	0.719421	0	0	No Change High Expression	unspliced
Dnah7a_chr1_53397006_53706784(-)_transcript=unspliced(-)	Dnah7a	309779	309580	0.306793	3.96163	3.23983	No Change Low Expression	unspliced
Stk17b_chr1_53755506_53785224(-)_transcript=unspliced(-)	Stk17b	29719	29520	1.99503	0	0	No Change Medium Expression	unspliced
Hecw2_chr1_53806876_54195168(-)_transcript=unspliced(-)	Hecw2	388293	388094	0.350654	3.26621	2.91867	Down	unspliced
Ccdc150_chr1_54250683_54368727(+)_transcript=unspliced(+)	Ccdc150	118045	117846	0.190789	0.367381	0.347997	No Change Low Expression	unspliced
Gtf3c3_chr1_54396004_54438971(-)_transcript=unspliced(-)	Gtf3c3	42968	42769	2.1277	0	0	No Change High Expression	unspliced
Pgap1_chr1_54472994_54557684(-)_transcript=unspliced(-)	Pgap1	84691	84492	2.09929	19.7701	14.1493	Down	unspliced
Gm36955_chr1_54518610_54520270(-)_transcript=unspliced(-)	Gm36955	1661	1461.99	0.72941	1.0259	0.783289	No Change Low Expression	unspliced
Ankrd44_chr1_54645340_54926387(-)_transcript=unspliced(-)	Ankrd44	281048	280849	0.178585	0	-0.0155072	No Change Low Expression	unspliced
Gm37370_chr1_54737166_54738575(-)_transcript=unspliced(-)	Gm37370	1410	1210.99	0.150122	0	0	No Change Low Expression	unspliced
Sf3b1_chr1_54985169_55027481(-)_transcript=unspliced(-)	Sf3b1	42313	42114	5.03042	0.0307385	0.0307385	No Change High Expression	unspliced
Coq10b_chr1_55052770_55072702(+)_transcript=unspliced(+)	Coq10b	19933	19734	1.10869	2.65559	2.21219	No Change Medium Expression	unspliced
Gm17971_chr1_55066264_55067069(+)_transcript=unspliced(+)	Gm17971	806	606.994	0.483959	0.658653	0.409482	No Change Low Expression	unspliced
Hspd1_chr1_55077835_55088243(-)_transcript=unspliced(-)	Hspd1	10409	10210	14.022	0.0122704	0.0122704	No Change High Expression	unspliced
Hspe1_chr1_55088132_55091307(+)_transcript=unspliced(+)	Hspe1	3176	2976.99	9.63396	0	0	No Change High Expression	unspliced
Gm5147_chr1_55120080_55120873(-)_transcript=unspliced(-)	Gm5147	794	594.994	0.28746	0.0293285	0.0293285	No Change Low Expression	unspliced
Gm16581_chr1_55127297_55128287(+)_transcript=unspliced(+)	Gm16581	991	791.994	0.282966	0	0	No Change Low Expression	unspliced
Mob4_chr1_55131231_55154899(+)_transcript=unspliced(+)	Mob4	23669	23470	2.68493	0	0	No Change Medium Expression	unspliced
Rftn2_chr1_55170159_55226782(-)_transcript=unspliced(-)	Rftn2	56624	56425	0.0996513	0.422295	0.406946	No Change Low Expression	unspliced
Mars2_chr1_55237177_55248470(+)_transcript=unspliced(+)	Mars2	11294	11095	1.67615	0	0	No Change Medium Expression	unspliced
Boll_chr1_55248658_55363469(-)_transcript=unspliced(-)	Boll	114812	114613	0.340925	4.74735	4.1865	No Change Medium Expression	unspliced
Gm8292_chr1_55335401_55335796(+)_transcript=unspliced(+)	Gm8292	396	197.002	3.05386	0	0	No Change Medium Expression	unspliced
Gm38056_chr1_55440904_55445930(+)_transcript=unspliced(+)	Gm38056	5027	4827.99	0.142232	0	0	No Change Low Expression	unspliced
Satb2_chr1_56793981_56978650(-)_transcript=unspliced(-)	Satb2	184670	184471	0.878482	0.913814	0.744968	No Change Medium Expression	unspliced
4930558J18Rik_chr1_57359222_57377544(-)_transcript=unspliced(-)	4930558J18Rik	18323	18124	0.704623	0.273056	0.241853	No Change Medium Expression	unspliced
1700066M21Rik_chr1_57377620_57385423(+)_transcript=unspliced(+)	1700066M21Rik	7804	7604.99	0.826019	0	0	No Change Medium Expression	unspliced
Tyw5_chr1_57388237_57407101(-)_transcript=unspliced(-)	Tyw5	18865	18666	1.61793	0.230724	0.214421	No Change Medium Expression	unspliced
Maip1_chr1_57406328_57417953(+)_transcript=unspliced(+)	Maip1	11626	11427	1.13305	0	0	No Change Medium Expression	unspliced
Spats2l_chr1_57774162_57948394(+)_transcript=unspliced(+)	Spats2l	174233	174034	0.717204	9.4162	8.51774	Down	unspliced
Kctd18_chr1_57955101_58018956(-)_transcript=unspliced(-)	Kctd18	63856	63657	0.512347	0.340325	0.293722	No Change Medium Expression	unspliced
Sgo2a_chr1_57995971_58025899(+)_transcript=unspliced(+)	Sgo2a	29929	29730	4.49498	0	0	No Change High Expression	unspliced
Aox1_chr1_58029931_58106413(+)_transcript=unspliced(+)	Aox1	76483	76284	0.164271	0.259214	0.243866	No Change Low Expression	unspliced
Aox3_chr1_58113130_58200698(+)_transcript=unspliced(+)	Aox3	87569	87370	0.0514513	0.0423272	0.0423272	No Change Low Expression	unspliced
Aox4_chr1_58210397_58268597(+)_transcript=unspliced(+)	Aox4	58201	58002	0.0285913	0.00959761	0.00959761	No Change Low Expression	unspliced
Gm37607_chr1_58383512_58386134(-)_transcript=unspliced(-)	Gm37607	2623	2423.99	0.747882	0.507621	0.346462	No Change Low Expression	unspliced
Bzw1_chr1_58392898_58407353(+)_transcript=unspliced(+)	Bzw1	14456	14257	9.08163	0	0	Down	unspliced
Clk1_chr1_58410189_58424066(-)_transcript=unspliced(-)	Clk1	13878	13679	14.7125	0	-0.0183909	No Change High Expression	unspliced
Ppil3_chr1_58430994_58445486(-)_transcript=unspliced(-)	Ppil3	14493	14294	1.91037	3.51057	2.8035	No Change Medium Expression	unspliced
Nif3l1_chr1_58445151_58481816(+)_transcript=unspliced(+)	Nif3l1	36666	36467	0.903281	0	0	No Change Medium Expression	unspliced
Orc2_chr1_58462771_58505109(-)_transcript=unspliced(-)	Orc2	42339	42140	4.67783	0.00961393	0.00961393	No Change High Expression	unspliced
Fam126b_chr1_58522806_58586323(-)_transcript=unspliced(-)	Fam126b	63518	63319	0.907685	0.584916	0.523516	No Change Medium Expression	unspliced
Ndufb3_chr1_58586384_58595964(+)_transcript=unspliced(+)	Ndufb3	9581	9381.99	1.07358	0	0	No Change High Expression	unspliced
Cbx3-ps7_chr1_58646688_58647239(+)_transcript=unspliced(+)	Cbx3-ps7	552	352.994	70.1801	0	0	No Change High Expression	unspliced
Flacc1_chr1_58646903_58695989(-)_transcript=unspliced(-)	Flacc1	49087	48888	0.0369289	0	0	No Change Low Expression	unspliced
Cflar_chr1_58711508_58758884(+)_transcript=unspliced(+)	Cflar	47377	47178	0.876459	3.9471	3.43816	No Change Medium Expression	unspliced
Casp8_chr1_58795374_58847503(+)_transcript=unspliced(+)	Casp8	52130	51931	0.154565	0.00962324	0.00962324	No Change Medium Expression	unspliced
Trak2_chr1_58900449_58973430(-)_transcript=unspliced(-)	Trak2	72982	72783	1.46571	0.416675	0.354713	No Change Medium Expression	unspliced
Stradb_chr1_58973522_58995715(+)_transcript=unspliced(+)	Stradb	22194	21995	0.368797	0.00959761	-0.00575089	No Change Medium Expression	unspliced
Tmem237_chr1_59100590_59120408(-)_transcript=unspliced(-)	Tmem237	19819	19620	0.57677	0	0	No Change Medium Expression	unspliced
G730003C15Rik_chr1_59119833_59122141(+)_transcript=unspliced(+)	G730003C15Rik	2309	2109.99	0.176678	0.0623845	0.0623845	No Change Low Expression	unspliced
Als2_chr1_59162926_59237231(-)_transcript=unspliced(-)	Als2	74306	74107	1.90403	0	0	No Change Medium Expression	unspliced
Fzd7_chr1_59482424_59486955(+)_transcript=unspliced(+)	Fzd7	4532	4332.99	24.8402	0.0143964	0.0143964	No Change High Expression	unspliced
Gm973_chr1_59516264_59636417(+)_transcript=unspliced(+)	Gm973	120154	119955	0.04723	0.109105	0.0932713	No Change Low Expression	unspliced
Sumo1_chr1_59586558_59670834(-)_transcript=unspliced(-)	Sumo1	84277	84078	2.65888	9.41234	5.79746	No Change High Expression	unspliced
D430013B06Rik_chr1_59646200_59648071(-)_transcript=unspliced(-)	D430013B06Rik	1872	1672.99	2.06228	0	0	No Change Medium Expression	unspliced
Gm29596_chr1_59673241_59673625(+)_transcript=unspliced(+)	Gm29596	385	186.014	0.667989	0	0	No Change Low Expression	unspliced
Nop58_chr1_59684971_59719044(+)_transcript=unspliced(+)	Nop58	34074	33875	20.2001	0.141547	0.014646	No Change High Expression	unspliced
Bmpr2_chr1_59763400_59879014(+)_transcript=unspliced(+)	Bmpr2	115615	115416	1.99256	0.803963	0.702754	Down	unspliced
Fam117b_chr1_59913006_59985346(+)_transcript=unspliced(+)	Fam117b	72341	72142	1.44911	2.46716	1.86915	No Change Medium Expression	unspliced
Ica1l_chr1_59982490_60043184(-)_transcript=unspliced(-)	Ica1l	60695	60496	0.0994546	0	-0.0153485	No Change Low Expression	unspliced
Wdr12_chr1_60069785_60098645(-)_transcript=unspliced(-)	Wdr12	28861	28662	2.90433	0.0145942	0.0145942	No Change High Expression	unspliced
Carf_chr1_60098247_60153953(+)_transcript=unspliced(+)	Carf	55707	55508	0.861963	0.291128	0.291128	No Change Medium Expression	unspliced
Gm15464_chr1_60117255_60117685(+)_transcript=unspliced(+)	Gm15464	431	231.994	0.303895	0	0	No Change Low Expression	unspliced
Nbeal1_chr1_60180599_60338328(+)_transcript=unspliced(+)	Nbeal1	157730	157531	2.09541	12.1511	9.63207	No Change Medium Expression	unspliced
Cyp20a1_chr1_60343323_60388060(+)_transcript=unspliced(+)	Cyp20a1	44738	44539	1.43307	3.5439	2.31419	No Change Medium Expression	unspliced
6030460B20Rik_chr1_60353119_60354176(+)_transcript=unspliced(+)	6030460B20Rik	1058	858.994	0.922857	0	0	No Change Low Expression	unspliced
Abi2_chr1_60409619_60481158(+)_transcript=unspliced(+)	Abi2	71540	71341	3.00513	0	-0.0613941	No Change High Expression	unspliced
Raph1_chr1_60482292_60567104(-)_transcript=unspliced(-)	Raph1	84813	84614	4.26848	0.308916	0.308916	No Change High Expression	unspliced
Gm11578_chr1_60592251_60592709(-)_transcript=unspliced(-)	Gm11578	459	259.994	0.359712	0	0	No Change Low Expression	unspliced
Eif4a-ps4_chr1_60703932_60705149(+)_transcript=unspliced(+)	Eif4a-ps4	1218	1018.99	230.223	0	0	Up	unspliced
Rpl18-ps1_chr1_60900898_60901422(+)_transcript=unspliced(+)	Rpl18-ps1	525	325.994	0.529209	0	0	No Change Low Expression	unspliced
Pard3b_chr1_61638824_62642284(+)_transcript=unspliced(+)	Pard3b	1003461	1003260	0.123012	2.48558	2.26958	No Change Low Expression	unspliced
Nrp2_chr1_62703285_62818695(+)_transcript=unspliced(+)	Nrp2	115411	115212	2.26419	13.2923	9.29591	No Change Medium Expression	unspliced
Ino80d_chr1_62958418_63114667(-)_transcript=unspliced(-)	Ino80d	156250	156051	1.41216	0.0225477	0.0070957	No Change Medium Expression	unspliced
Ino80dos_chr1_63113078_63158290(+)_transcript=unspliced(+)	Ino80dos	45213	45014	1.35752	9.82843	7.77521	No Change Medium Expression	unspliced
Gm20342_chr1_63117118_63126837(+)_transcript=unspliced(+)	Gm20342	9720	9520.99	1.8912	1.28774	1.19791	No Change Medium Expression	unspliced
Ndufs1_chr1_63143596_63176833(-)_transcript=unspliced(-)	Ndufs1	33238	33039	3.70126	0	0	No Change High Expression	unspliced
Eef1b2_chr1_63176825_63180486(+)_transcript=unspliced(+)	Eef1b2	3662	3462.99	17.8718	0	0	No Change High Expression	unspliced
Platr12_chr1_63200313_63207967(+)_transcript=unspliced(+)	Platr12	7655	7455.99	4.14506	0	-0.0159097	No Change High Expression	unspliced
Zdbf2_chr1_63273265_63314576(+)_transcript=unspliced(+)	Zdbf2	41312	41113	6.68103	59.6278	50.4383	Down	unspliced
Adam23_chr1_63445891_63596276(+)_transcript=unspliced(+)	Adam23	150386	150187	3.32986	19.6517	12.6314	Down	unspliced
Fastkd2_chr1_63730614_63754655(+)_transcript=unspliced(+)	Fastkd2	24042	23843	1.87804	0	0	No Change Medium Expression	unspliced
Klf7_chr1_64029447_64122282(-)_transcript=unspliced(-)	Klf7	92836	92637	2.39833	0.454963	0.421794	No Change Medium Expression	unspliced
Gm13750_chr1_64150201_64150665(+)_transcript=unspliced(+)	Gm13750	465	265.994	0.688974	0	0	No Change Low Expression	unspliced
Creb1_chr1_64532645_64604548(+)_transcript=unspliced(+)	Creb1	71904	71705	3.5836	2.75574	1.74274	Down	unspliced
Mettl21a_chr1_64606473_64617242(-)_transcript=unspliced(-)	Mettl21a	10770	10571	0.774064	0	0	No Change Medium Expression	unspliced
2810408I11Rik_chr1_64679871_64690659(-)_transcript=unspliced(-)	2810408I11Rik	10789	10590	1.0745	1.14212	0.850498	No Change Medium Expression	unspliced
Ccnyl1_chr1_64690455_64725644(+)_transcript=unspliced(+)	Ccnyl1	35190	34991	2.90853	0	0	No Change Medium Expression	unspliced
Fzd5_chr1_64730558_64737751(-)_transcript=unspliced(-)	Fzd5	7194	6994.99	0.7954	0	0	No Change High Expression	unspliced
Plekhm3_chr1_64785983_64956824(-)_transcript=unspliced(-)	Plekhm3	170842	170643	1.27121	10.1223	8.09645	No Change Medium Expression	unspliced
D630023F18Rik_chr1_65105285_65123214(-)_transcript=unspliced(-)	D630023F18Rik	17930	17731	0.0493586	0.0671984	0.0671984	No Change Medium Expression	unspliced
Idh1_chr1_65158616_65186500(-)_transcript=unspliced(-)	Idh1	27885	27686	1.18102	0	0	No Change High Expression	unspliced
Pikfyve_chr1_65186683_65278695(+)_transcript=unspliced(+)	Pikfyve	92013	91814	2.53289	18.4277	13.6635	No Change Medium Expression	unspliced
Map2_chr1_66175273_66442583(+)_transcript=unspliced(+)	Map2	267311	267112	0.346607	0	0	No Change Medium Expression	unspliced
Unc80_chr1_66468367_66699148(+)_transcript=unspliced(+)	Unc80	230782	230583	0.0318759	0.0235071	0.0081213	No Change Low Expression	unspliced
Rpe_chr1_66700831_66719805(+)_transcript=unspliced(+)	Rpe	18975	18776	9.85543	0	0	No Change High Expression	unspliced
Kansl1l_chr1_66719248_66817562(-)_transcript=unspliced(-)	Kansl1l	98315	98116	1.03225	8.53552	6.0604	No Change Medium Expression	unspliced
Gm38162_chr1_66775511_66780107(+)_transcript=unspliced(+)	Gm38162	4597	4397.99	0.726451	0.225544	0.225544	Down	unspliced
6820402A03Rik_chr1_66793645_66796298(-)_transcript=unspliced(-)	6820402A03Rik	2654	2454.99	0.968533	0.680219	0.388866	No Change Low Expression	unspliced
Gm37285_chr1_66799659_66800797(-)_transcript=unspliced(-)	Gm37285	1139	939.994	0.673563	0	-0.0495378	No Change Low Expression	unspliced
Gm38218_chr1_66821226_66825914(-)_transcript=unspliced(-)	Gm38218	4689	4489.99	0.221539	0	0	No Change Low Expression	unspliced
Acadl_chr1_66830839_66863277(-)_transcript=unspliced(-)	Acadl	32439	32240	0.917298	3.41182	2.75861	No Change High Expression	unspliced
Gm15793_chr1_66849108_66849602(-)_transcript=unspliced(-)	Gm15793	495	295.994	2.92109	0.318164	0.265802	No Change Medium Expression	unspliced
Rpl31-ps14_chr1_66948563_66948940(-)_transcript=unspliced(-)	Rpl31-ps14	378	179.028	0.685265	0	0	No Change Low Expression	unspliced
Lancl1_chr1_67000517_67038872(-)_transcript=unspliced(-)	Lancl1	38356	38157	1.05724	1.30118	0.80933	No Change High Expression	unspliced
Ikzf2_chr1_69531214_69687245(-)_transcript=unspliced(-)	Ikzf2	156032	155833	0.438269	1.47138	1.3	No Change Low Expression	unspliced
Gm28112_chr1_69660187_69662061(-)_transcript=unspliced(-)	Gm28112	1875	1675.99	0.299834	0	0	No Change Low Expression	unspliced
Spag16_chr1_69826970_70725132(+)_transcript=unspliced(+)	Spag16	898163	897964	0.0320571	0.550811	0.411472	No Change Low Expression	unspliced
Bard1_chr1_71027498_71103146(-)_transcript=unspliced(-)	Bard1	75649	75450	5.80452	1.66391	1.49925	No Change High Expression	unspliced
Gm16236_chr1_71039652_71040030(-)_transcript=unspliced(-)	Gm16236	379	180.025	0.778861	0	0	No Change Low Expression	unspliced
Atic_chr1_71557150_71579631(+)_transcript=unspliced(+)	Atic	22482	22283	2.8938	0	0	No Change High Expression	unspliced
Fn1_chr1_71585520_71653200(-)_transcript=unspliced(-)	Fn1	67681	67482	9.43899	0	-0.0168631	Up	unspliced
Gm5829_chr1_71709705_71710055(-)_transcript=unspliced(-)	Gm5829	351	152.196	2.47289	0	0	No Change Medium Expression	unspliced
Gm5256_chr1_71714048_71714924(-)_transcript=unspliced(-)	Gm5256	877	677.994	0.132242	0	0	No Change Low Expression	unspliced
Gm5528_chr1_72004288_72004767(+)_transcript=unspliced(+)	Gm5528	480	280.994	0.316508	0	0	No Change Low Expression	unspliced
Gm8885_chr1_72087857_72088454(+)_transcript=unspliced(+)	Gm8885	598	398.994	1.76922	0	0	No Change Medium Expression	unspliced
Mreg_chr1_72159442_72212307(-)_transcript=unspliced(-)	Mreg	52866	52667	6.2436	0.00960011	0.00960011	No Change High Expression	unspliced
Gm24497_chr1_72244213_72244403(+)_transcript=unspliced(+)	Gm24497	191	37.4475	16.2359	0	0	No Change High Expression	unspliced
Pecr_chr1_72259167_72284314(-)_transcript=unspliced(-)	Pecr	25148	24949	0.930684	0	0	No Change Medium Expression	unspliced
Tmem169_chr1_72284369_72303104(+)_transcript=unspliced(+)	Tmem169	18736	18537	0.0694344	0	0	No Change Low Expression	unspliced
Xrcc5_chr1_72307427_72394952(+)_transcript=unspliced(+)	Xrcc5	87526	87327	4.90404	9.86231	8.03574	No Change High Expression	unspliced
Gm15843_chr1_72459499_72460027(+)_transcript=unspliced(+)	Gm15843	529	329.994	0.133565	0	0	No Change Low Expression	unspliced
Smarcal1_chr1_72583251_72633134(+)_transcript=unspliced(+)	Smarcal1	49884	49685	1.11617	0.403964	0.403964	No Change Medium Expression	unspliced
Gm39662_chr1_72641188_72642963(+)_transcript=unspliced(+)	Gm39662	1776	1576.99	0.150887	0	0	No Change Low Expression	unspliced
Rpl37a_chr1_72711290_72713813(+)_transcript=unspliced(+)	Rpl37a	2524	2324.99	32.8282	0	-0.0153485	No Change High Expression	unspliced
Igfbp2_chr1_72824503_72852474(+)_transcript=unspliced(+)	Igfbp2	27972	27773	12.4163	0.00960318	0.00960318	Up	unspliced
Igfbp5_chr1_72857932_72874884(-)_transcript=unspliced(-)	Igfbp5	16953	16754	0.00756709	0	0	No Change Low Expression	unspliced
Tns1_chr1_73910231_74124449(-)_transcript=unspliced(-)	Tns1	214219	214020	0.37933	0	0	No Change Medium Expression	unspliced
Arpc2_chr1_74236084_74268209(+)_transcript=unspliced(+)	Arpc2	32126	31927	4.64257	0	0	No Change High Expression	unspliced
Aamp_chr1_74279840_74284738(-)_transcript=unspliced(-)	Aamp	4899	4699.99	3.07427	0	0	No Change High Expression	unspliced
Pnkd_chr1_74284930_74353694(+)_transcript=unspliced(+)	Pnkd	68765	68566	0.664471	1.52628	1.08091	No Change High Expression	unspliced
Tmbim1_chr1_74288247_74305622(-)_transcript=unspliced(-)	Tmbim1	17376	17177	1.39048	0	0	No Change Medium Expression	unspliced
Catip_chr1_74362108_74369321(+)_transcript=unspliced(+)	Catip	7214	7014.99	0.240183	0.171182	0.171182	No Change Low Expression	unspliced
Slc11a1_chr1_74375195_74386062(+)_transcript=unspliced(+)	Slc11a1	10868	10669	0.161691	0	0	No Change Medium Expression	unspliced
Ctdsp1_chr1_74391509_74397285(+)_transcript=unspliced(+)	Ctdsp1	5777	5577.99	1.78851	0	0	No Change High Expression	unspliced
Vil1_chr1_74409376_74435559(+)_transcript=unspliced(+)	Vil1	26184	25985	0.0832335	0	0	No Change Low Expression	unspliced
Usp37_chr1_74435511_74544284(-)_transcript=unspliced(-)	Usp37	108774	108575	2.80757	0.352467	0.352467	No Change High Expression	unspliced
Gm37733_chr1_74500340_74503301(-)_transcript=unspliced(-)	Gm37733	2962	2762.99	1.65545	0	0	No Change Medium Expression	unspliced
Cnot9_chr1_74506058_74530842(+)_transcript=unspliced(+)	Cnot9	24785	24586	4.1778	0.0291397	0.0291397	No Change High Expression	unspliced
Plcd4_chr1_74542888_74567794(+)_transcript=unspliced(+)	Plcd4	24907	24708	0.146177	0.0588396	0.0588396	No Change Low Expression	unspliced
Zfp142_chr1_74565127_74588246(-)_transcript=unspliced(-)	Zfp142	23120	22921	3.22605	0.0191952	0.0191952	No Change Medium Expression	unspliced
Bcs1l_chr1_74588289_74592443(+)_transcript=unspliced(+)	Bcs1l	4155	3955.99	1.48396	0	0	No Change Medium Expression	unspliced
Rnf25_chr1_74593748_74601397(-)_transcript=unspliced(-)	Rnf25	7650	7450.99	2.06985	0	0	No Change Medium Expression	unspliced
Stk36_chr1_74601445_74636894(+)_transcript=unspliced(+)	Stk36	35450	35251	0.283623	0	0	No Change Medium Expression	unspliced
Ttll4_chr1_74661745_74703730(+)_transcript=unspliced(+)	Ttll4	41986	41787	6.58537	0.390963	0.333499	No Change High Expression	unspliced
Cyp27a1_chr1_74713574_74737892(+)_transcript=unspliced(+)	Cyp27a1	24319	24120	0.276299	0.111181	0.111181	No Change Low Expression	unspliced
Prkag3_chr1_74738922_74749221(-)_transcript=unspliced(-)	Prkag3	10300	10101	0.122531	0	0	No Change Low Expression	unspliced
Wnt6_chr1_74771892_74785322(+)_transcript=unspliced(+)	Wnt6	13431	13232	0.151214	0.380191	0.362313	No Change Low Expression	unspliced
Cdk5r2_chr1_74854934_74857732(+)_transcript=unspliced(+)	Cdk5r2	2799	2599.99	0.586992	0	0	No Change Low Expression	unspliced
Ihh_chr1_74945315_74951672(-)_transcript=unspliced(-)	Ihh	6358	6158.99	0.106474	0	0	No Change Low Expression	unspliced
Nhej1_chr1_74967139_75125200(-)_transcript=unspliced(-)	Nhej1	158062	157863	0.644418	8.73397	8.01148	No Change Medium Expression	unspliced
Cnppd1_chr1_75134554_75142711(-)_transcript=unspliced(-)	Cnppd1	8158	7958.99	0.484275	0	0	No Change Medium Expression	unspliced
Retreg2_chr1_75142778_75147913(+)_transcript=unspliced(+)	Retreg2	5136	4936.99	0.500127	0	0	No Change Medium Expression	unspliced
Zfand2b_chr1_75168646_75171629(+)_transcript=unspliced(+)	Zfand2b	2984	2784.99	0.501788	0	0	No Change Medium Expression	unspliced
Abcb6_chr1_75171717_75180392(-)_transcript=unspliced(-)	Abcb6	8676	8476.99	0.501118	0	0	No Change Medium Expression	unspliced
Atg9a_chr1_75180860_75192196(-)_transcript=unspliced(-)	Atg9a	11337	11138	0.818371	0	0	No Change Medium Expression	unspliced
Ankzf1_chr1_75192151_75199387(+)_transcript=unspliced(+)	Ankzf1	7237	7037.99	1.90384	0	0	Up	unspliced
Glb1l_chr1_75198236_75210813(-)_transcript=unspliced(-)	Glb1l	12578	12379	1.54181	0.00628665	0.00628665	No Change Medium Expression	unspliced
Stk16_chr1_75210838_75215606(+)_transcript=unspliced(+)	Stk16	4769	4569.99	2.83898	0	0	No Change Medium Expression	unspliced
Tuba4a_chr1_75214228_75219865(-)_transcript=unspliced(-)	Tuba4a	5638	5438.99	2.67191	0	0	No Change High Expression	unspliced
Dnajb2_chr1_75236406_75245692(+)_transcript=unspliced(+)	Dnajb2	9287	9087.99	1.56024	0	0	No Change Medium Expression	unspliced
Ptprn_chr1_75247027_75264502(-)_transcript=unspliced(-)	Ptprn	17476	17277	0.931199	0	0	No Change Medium Expression	unspliced
Dnpep_chr1_75307896_75317990(-)_transcript=unspliced(-)	Dnpep	10095	9895.99	1.14422	0	0	No Change High Expression	unspliced
Des_chr1_75360329_75368579(+)_transcript=unspliced(+)	Des	8251	8051.99	0.114032	0	0	No Change Medium Expression	unspliced
Speg_chr1_75375297_75432320(+)_transcript=unspliced(+)	Speg	57024	56825	0.528215	0.27633	0.214936	No Change Medium Expression	unspliced
Gmppa_chr1_75435930_75443179(+)_transcript=unspliced(+)	Gmppa	7250	7050.99	1.35539	0	0	No Change Medium Expression	unspliced
Chpf_chr1_75474569_75479307(-)_transcript=unspliced(-)	Chpf	4739	4539.99	0.419481	0	0	No Change Medium Expression	unspliced
Obsl1_chr1_75479310_75506452(-)_transcript=unspliced(-)	Obsl1	27143	26944	0.913106	0.00959761	0.00959761	No Change Medium Expression	unspliced
Inha_chr1_75507077_75510366(+)_transcript=unspliced(+)	Inha	3290	3090.99	0.456402	0	0	No Change Low Expression	unspliced
Stk11ip_chr1_75521529_75537335(+)_transcript=unspliced(+)	Stk11ip	15807	15608	1.30352	0	-0.0153485	No Change Medium Expression	unspliced
Slc4a3_chr1_75546266_75562172(+)_transcript=unspliced(+)	Slc4a3	15907	15708	0.497924	0	0	No Change Low Expression	unspliced
Gm5257_chr1_75636390_75637179(+)_transcript=unspliced(+)	Gm5257	790	590.994	0.395861	0	0	No Change Low Expression	unspliced
Epha4_chr1_77367185_77515088(-)_transcript=unspliced(-)	Epha4	147904	147705	2.14738	4.0493	2.94964	No Change Medium Expression	unspliced
Farsb_chr1_78417975_78488897(-)_transcript=unspliced(-)	Farsb	70923	70724	3.87969	4.69888	3.42412	No Change High Expression	unspliced
4833412K13Rik_chr1_78465448_78466926(-)_transcript=unspliced(-)	4833412K13Rik	1479	1279.99	1.06948	0	0	No Change Medium Expression	unspliced
5730419F03Rik_chr1_78595031_78609508(-)_transcript=unspliced(-)	5730419F03Rik	14478	14279	2.34781	9.17583	7.61132	No Change Medium Expression	unspliced
Acsl3_chr1_78657825_78707743(+)_transcript=unspliced(+)	Acsl3	49919	49720	2.70517	3.16021	2.14721	Down	unspliced
Utp14b_chr1_78658038_78671512(+)_transcript=unspliced(+)	Utp14b	13475	13276	3.51656	0	0	No Change Medium Expression	unspliced
Ap1s3_chr1_79606876_79671972(-)_transcript=unspliced(-)	Ap1s3	65097	64898	2.78246	22.5546	15.525	Down	unspliced
Wdfy1_chr1_79702262_79776143(-)_transcript=unspliced(-)	Wdfy1	73882	73683	1.38636	0	0	No Change Medium Expression	unspliced
Mrpl44_chr1_79776018_79781445(+)_transcript=unspliced(+)	Mrpl44	5428	5228.99	0.551198	0	0	No Change Medium Expression	unspliced
Serpine2_chr1_79794197_79861180(-)_transcript=unspliced(-)	Serpine2	66984	66785	1.31171	1.43748	0.992373	No Change Medium Expression	unspliced
Gm37932_chr1_80255031_80256197(-)_transcript=unspliced(-)	Gm37932	1167	967.994	0.386376	0	0	No Change Low Expression	unspliced
Cul3_chr1_80264923_80340480(-)_transcript=unspliced(-)	Cul3	75558	75359	4.68116	0	0	Down	unspliced
Irs1_chr1_82233101_82291416(-)_transcript=unspliced(-)	Irs1	58316	58117	0.66147	0.143964	0.143964	No Change Medium Expression	unspliced
Rhbdd1_chr1_82316452_82445366(+)_transcript=unspliced(+)	Rhbdd1	128915	128716	1.25553	6.15231	4.98283	No Change Medium Expression	unspliced
Mff_chr1_82724890_82752394(+)_transcript=unspliced(+)	Mff	27505	27306	4.0864	1.85234	1.2691	No Change High Expression	unspliced
Gm28941_chr1_82739691_82740707(+)_transcript=unspliced(+)	Gm28941	1017	817.994	0.134072	0	0	No Change Low Expression	unspliced
Agfg1_chr1_82839483_82901182(+)_transcript=unspliced(+)	Agfg1	61700	61501	6.33536	3.35901	1.76276	No Change High Expression	unspliced
A030005L19Rik_chr1_82913325_82914130(+)_transcript=unspliced(+)	A030005L19Rik	806	606.994	0.477648	0	0	No Change Low Expression	unspliced
Gm7553_chr1_83003482_83004907(-)_transcript=unspliced(-)	Gm7553	1426	1226.99	0.189754	0	0	No Change Low Expression	unspliced
Slc19a3_chr1_83012523_83038448(-)_transcript=unspliced(-)	Slc19a3	25926	25727	0.11768	0	-0.0153772	No Change Low Expression	unspliced
Pid1_chr1_84036296_84364180(-)_transcript=unspliced(-)	Pid1	327885	327686	1.55685	61.217	50.6768	Down	unspliced
Gm37058_chr1_84132867_84134510(-)_transcript=unspliced(-)	Gm37058	1644	1444.99	0.482766	0	0	No Change Low Expression	unspliced
Dner_chr1_84369839_84696221(-)_transcript=unspliced(-)	Dner	326383	326184	0.0862011	0.0321743	0.0321743	No Change Low Expression	unspliced
Trip12_chr1_84721189_84840516(-)_transcript=unspliced(-)	Trip12	119328	119129	12.9112	0	-0.0156259	No Change High Expression	unspliced
Fbxo36_chr1_84839841_84900487(+)_transcript=unspliced(+)	Fbxo36	60647	60448	0.607475	10.4556	8.69052	No Change Medium Expression	unspliced
Slc16a14_chr1_84905898_84935134(-)_transcript=unspliced(-)	Slc16a14	29237	29038	0.168047	0	0	No Change Low Expression	unspliced
Rpl19-ps1_chr1_85012114_85012704(+)_transcript=unspliced(+)	Rpl19-ps1	591	391.994	0.751402	0	0	Up	unspliced
A630001G21Rik_chr1_85717083_85778643(-)_transcript=unspliced(-)	A630001G21Rik	61561	61362	0.0560611	0	0	No Change Low Expression	unspliced
Cab39_chr1_85793441_85851576(+)_transcript=unspliced(+)	Cab39	58136	57937	3.19665	6.65914	5.67475	No Change High Expression	unspliced
Itm2c_chr1_85894281_85908675(+)_transcript=unspliced(+)	Itm2c	14395	14196	1.31469	0	0	No Change Medium Expression	unspliced
2810459M11Rik_chr1_86045863_86055456(+)_transcript=unspliced(+)	2810459M11Rik	9594	9394.99	0.0145822	0	0	No Change Low Expression	unspliced
Psmd1_chr1_86064387_86139151(+)_transcript=unspliced(+)	Psmd1	74765	74566	2.89116	0.00965078	0.00965078	No Change High Expression	unspliced
Armc9_chr1_86154780_86278284(+)_transcript=unspliced(+)	Armc9	123505	123306	0.865367	5.60877	3.99418	No Change Medium Expression	unspliced
B3gnt7_chr1_86302832_86307305(+)_transcript=unspliced(+)	B3gnt7	4474	4274.99	3.43274	0	0	No Change High Expression	unspliced
Ncl_chr1_86344719_86359400(-)_transcript=unspliced(-)	Ncl	14682	14483	27.165	0.0636674	0.0636674	No Change High Expression	unspliced
Ptma_chr1_86526726_86530712(+)_transcript=unspliced(+)	Ptma	3987	3787.99	23.7091	0	0	No Change High Expression	unspliced
Pde6d_chr1_86542994_86582629(-)_transcript=unspliced(-)	Pde6d	39636	39437	2.58789	0	0	No Change High Expression	unspliced
Cops7b_chr1_86582904_86609375(+)_transcript=unspliced(+)	Cops7b	26472	26273	1.30577	0	0	No Change Medium Expression	unspliced
Dis3l2_chr1_86703808_87050095(+)_transcript=unspliced(+)	Dis3l2	346288	346089	1.02611	19.1716	15.6469	No Change Medium Expression	unspliced
Gm29055_chr1_86774819_86776528(+)_transcript=unspliced(+)	Gm29055	1710	1510.99	1.79749	0	0	No Change Medium Expression	unspliced
Gm6136_chr1_86908793_86909683(-)_transcript=unspliced(-)	Gm6136	891	691.994	85.121	0	0	No Change High Expression	unspliced
Ecel1_chr1_87147655_87156521(-)_transcript=unspliced(-)	Ecel1	8867	8667.99	0.088787	0	0	No Change Medium Expression	unspliced
Eif4e2_chr1_87213914_87240488(+)_transcript=unspliced(+)	Eif4e2	26575	26376	5.70014	6.19653	4.22725	No Change High Expression	unspliced
Efhd1_chr1_87264363_87310839(+)_transcript=unspliced(+)	Efhd1	46477	46278	0.127866	0	0	No Change Medium Expression	unspliced
Gigyf2_chr1_87326998_87450796(+)_transcript=unspliced(+)	Gigyf2	123799	123600	4.8297	0.00960654	0.00960654	No Change High Expression	unspliced
Ngef_chr1_87476834_87573870(-)_transcript=unspliced(-)	Ngef	97037	96838	0.0467935	0.106302	0.106302	No Change Medium Expression	unspliced
Inpp5d_chr1_87620312_87720507(+)_transcript=unspliced(+)	Inpp5d	100196	99997	2.00602	0	0	Up	unspliced
Atg16l1_chr1_87755870_87792428(+)_transcript=unspliced(+)	Atg16l1	36559	36360	5.09024	28.2548	20.3638	No Change High Expression	unspliced
Gm25395_chr1_87776938_87777209(+)_transcript=unspliced(+)	Gm25395	272	80.518	80.2733	0	0	No Change High Expression	unspliced
Scarna6_chr1_87784556_87784820(+)_transcript=unspliced(+)	Scarna6	265	75.3392	32.0897	0	0	No Change High Expression	unspliced
Dgkd_chr1_87853287_87945180(+)_transcript=unspliced(+)	Dgkd	91894	91695	2.70003	5.19864	2.62207	No Change High Expression	unspliced
4833421G17Rik_chr1_87865073_87865916(+)_transcript=unspliced(+)	4833421G17Rik	844	644.994	0.255366	0	0	No Change Low Expression	unspliced
Gm38365_chr1_87897540_87900532(+)_transcript=unspliced(+)	Gm38365	2993	2793.99	0.285351	0	0	No Change Low Expression	unspliced
Usp40_chr1_87945119_88008551(-)_transcript=unspliced(-)	Usp40	63433	63234	1.17623	0	0	No Change Medium Expression	unspliced
Dnajb3_chr1_88204732_88205782(-)_transcript=unspliced(-)	Dnajb3	1051	851.994	0.327367	0	0	No Change Low Expression	unspliced
Hjurp_chr1_88262471_88277633(-)_transcript=unspliced(-)	Hjurp	15163	14964	17.1156	0	0	Up	unspliced
Gm28888_chr1_88459683_88465558(+)_transcript=unspliced(+)	Gm28888	5876	5676.99	0.849452	1.54522	1.01226	No Change Medium Expression	unspliced
Arl4c_chr1_88673125_88702221(-)_transcript=unspliced(-)	Arl4c	29097	28898	0.0563638	0	0	Down	unspliced
Sh3bp4_chr1_89070415_89155068(+)_transcript=unspliced(+)	Sh3bp4	84654	84455	4.01408	0	-0.0153485	No Change High Expression	unspliced
Gm38312_chr1_89097073_89098818(+)_transcript=unspliced(+)	Gm38312	1746	1546.99	3.10905	0	0	No Change Medium Expression	unspliced
Gm5259_chr1_89256182_89256981(-)_transcript=unspliced(-)	Gm5259	800	600.994	0.351799	0	0	No Change Low Expression	unspliced
Agap1_chr1_89454806_89897617(+)_transcript=unspliced(+)	Agap1	442812	442613	2.75456	8.50729	6.89688	No Change Medium Expression	unspliced
Gm37297_chr1_89483438_89485821(+)_transcript=unspliced(+)	Gm37297	2384	2184.99	0.783688	0	0	No Change Low Expression	unspliced
Gm26037_chr1_89684802_89685112(+)_transcript=unspliced(+)	Gm26037	311	113.675	0.444516	0	0	No Change Low Expression	unspliced
Gbx2_chr1_89927956_89931179(-)_transcript=unspliced(-)	Gbx2	3224	3024.99	0.219527	0	0	No Change Medium Expression	unspliced
D130058E05Rik_chr1_89930234_89933290(+)_transcript=unspliced(+)	D130058E05Rik	3057	2857.99	1.2782	0	0	No Change Medium Expression	unspliced
Iqca_chr1_90042132_90153401(-)_transcript=unspliced(-)	Iqca	111270	111071	0.0137482	0.0192021	0.0036949	No Change Low Expression	unspliced
Ackr3_chr1_90203980_90216751(+)_transcript=unspliced(+)	Ackr3	12772	12573	0.819238	0	0	No Change Low Expression	unspliced
Cops8_chr1_90602981_90613341(+)_transcript=unspliced(+)	Cops8	10361	10162	3.20158	0	0	No Change High Expression	unspliced
Mlph_chr1_90915085_90951142(+)_transcript=unspliced(+)	Mlph	36058	35859	0.0559734	0	0	No Change Low Expression	unspliced
Rab17_chr1_90958133_90969661(-)_transcript=unspliced(-)	Rab17	11529	11330	0.0914599	0	0	No Change Low Expression	unspliced
Lrrfip1_chr1_90998737_91128944(+)_transcript=unspliced(+)	Lrrfip1	130208	130009	1.9231	8.20619	6.03487	No Change High Expression	unspliced
Rbm44_chr1_91145089_91170795(+)_transcript=unspliced(+)	Rbm44	25707	25508	0.275063	0	0	Up	unspliced
Gm7776_chr1_91171429_91172148(-)_transcript=unspliced(-)	Gm7776	720	520.994	0.246941	0	0	No Change Low Expression	unspliced
Ube2f_chr1_91250304_91290337(+)_transcript=unspliced(+)	Ube2f	40034	39835	2.12932	3.77187	2.03749	No Change High Expression	unspliced
Gm7785_chr1_91296045_91296936(+)_transcript=unspliced(+)	Gm7785	892	692.994	0.747947	0	0	No Change Low Expression	unspliced
Scly_chr1_91298338_91321075(+)_transcript=unspliced(+)	Scly	22738	22539	1.66969	12.3687	7.51857	No Change Medium Expression	unspliced
Erfe_chr1_91366430_91374217(+)_transcript=unspliced(+)	Erfe	7788	7588.99	1.35357	0	0	No Change Medium Expression	unspliced
Ilkap_chr1_91373861_91398815(-)_transcript=unspliced(-)	Ilkap	24955	24756	5.24405	0.00959761	-0.0210994	No Change High Expression	unspliced
Hes6_chr1_91411483_91414038(-)_transcript=unspliced(-)	Hes6	2556	2356.99	0.919231	0	0	No Change Medium Expression	unspliced
Per2_chr1_91415982_91459324(-)_transcript=unspliced(-)	Per2	43343	43144	0.0915899	0	0	No Change Low Expression	unspliced
Traf3ip1_chr1_91494647_91529307(+)_transcript=unspliced(+)	Traf3ip1	34661	34462	2.04089	1.34838	0.901789	No Change Medium Expression	unspliced
Asb1_chr1_91540544_91559589(+)_transcript=unspliced(+)	Asb1	19046	18847	0.834974	0.153562	0.153562	No Change Medium Expression	unspliced
Hdac4_chr1_91928779_92195699(-)_transcript=unspliced(-)	Hdac4	266921	266722	3.63584	26.338	16.7228	No Change Medium Expression	unspliced
Ndufa10_chr1_92439010_92473860(-)_transcript=unspliced(-)	Ndufa10	34851	34652	2.14653	3.03285	2.26542	No Change High Expression	unspliced
Cops9_chr1_92637145_92641985(-)_transcript=unspliced(-)	Cops9	4841	4641.99	1.0562	0	0	No Change High Expression	unspliced
Gpc1_chr1_92831645_92860779(+)_transcript=unspliced(+)	Gpc1	29135	28936	1.34539	0.566259	0.504865	No Change Medium Expression	unspliced
Ankmy1_chr1_92859803_92902906(-)_transcript=unspliced(-)	Ankmy1	43104	42905	0.0364359	0	0	No Change Low Expression	unspliced
Dusp28_chr1_92906981_92908435(+)_transcript=unspliced(+)	Dusp28	1455	1255.99	0	0	0	No Change Medium Expression	unspliced
Rnpepl1_chr1_92910783_92924384(+)_transcript=unspliced(+)	Rnpepl1	13602	13403	1.23336	3.49034	2.06335	No Change Medium Expression	unspliced
Capn10_chr1_92934376_92947941(+)_transcript=unspliced(+)	Capn10	13566	13367	0.788956	0	0	No Change Medium Expression	unspliced
Kif1a_chr1_93015464_93101951(-)_transcript=unspliced(-)	Kif1a	86488	86289	1.02369	6.27774	4.24893	No Change Medium Expression	unspliced
Sned1_chr1_93235841_93301065(+)_transcript=unspliced(+)	Sned1	65225	65026	0.210463	0.508715	0.477609	No Change Low Expression	unspliced
Mterf4_chr1_93299211_93305915(-)_transcript=unspliced(-)	Mterf4	6705	6505.99	2.0115	0	0	No Change Medium Expression	unspliced
Gm7867_chr1_93306694_93307239(-)_transcript=unspliced(-)	Gm7867	546	346.994	1.09129	1.02693	0.82782	No Change Medium Expression	unspliced
Pask_chr1_93308770_93343482(-)_transcript=unspliced(-)	Pask	34713	34514	2.13593	0	0	No Change Medium Expression	unspliced
Ppp1r7_chr1_93342854_93373489(+)_transcript=unspliced(+)	Ppp1r7	30636	30437	1.71939	0	0	No Change Medium Expression	unspliced
Ano7_chr1_93373930_93404303(+)_transcript=unspliced(+)	Ano7	30374	30175	0.0314964	0	0	No Change Low Expression	unspliced
Hdlbp_chr1_93405940_93478815(-)_transcript=unspliced(-)	Hdlbp	72876	72677	4.38448	0.227756	0.227756	No Change High Expression	unspliced
Septin2_chr1_93478993_93509733(+)_transcript=unspliced(+)	Septin2	30741	30542	5.71777	0	0	No Change High Expression	unspliced
Farp2_chr1_93512079_93621976(+)_transcript=unspliced(+)	Farp2	109898	109699	0.456905	0.917286	0.87124	No Change Medium Expression	unspliced
Stk25_chr1_93619751_93658659(-)_transcript=unspliced(-)	Stk25	38909	38710	1.00355	0	0	No Change High Expression	unspliced
Bok_chr1_93685660_93695764(+)_transcript=unspliced(+)	Bok	10105	9905.99	1.15202	0	0	No Change Medium Expression	unspliced
Thap4_chr1_93701935_93754864(-)_transcript=unspliced(-)	Thap4	52930	52731	2.14934	0.0106887	-0.0660539	No Change High Expression	unspliced
Gm10550_chr1_93731104_93751072(+)_transcript=unspliced(+)	Gm10550	19969	19770	0.0440799	0	0	No Change Low Expression	unspliced
Atg4b_chr1_93751500_93790610(+)_transcript=unspliced(+)	Atg4b	39111	38912	2.42496	2.73634	1.63124	No Change Medium Expression	unspliced
Dtymk_chr1_93792576_93801934(-)_transcript=unspliced(-)	Dtymk	9359	9159.99	11.6666	0.028812	-0.001885	No Change High Expression	unspliced
Ing5_chr1_93803965_93822101(+)_transcript=unspliced(+)	Ing5	18137	17938	2.37836	0	0	No Change High Expression	unspliced
D2hgdh_chr1_93824909_93852348(+)_transcript=unspliced(+)	D2hgdh	27440	27241	1.27484	0.153771	0.153771	No Change Medium Expression	unspliced
Gm18666_chr1_93906244_93916768(+)_transcript=unspliced(+)	Gm18666	10525	10326	0.172525	0	0	No Change Low Expression	unspliced
Gm7889_chr1_93975353_93985816(+)_transcript=unspliced(+)	Gm7889	10464	10265	0.10349	0	0	No Change Low Expression	unspliced
Gm7895_chr1_94468715_94469887(-)_transcript=unspliced(-)	Gm7895	1173	973.994	3.60059	0	0	No Change Medium Expression	unspliced
Fam174a_chr1_95313623_95335284(+)_transcript=unspliced(+)	Fam174a	21662	21463	0.367385	0	0	No Change Medium Expression	unspliced
Gm15427_chr1_95498621_95499151(+)_transcript=unspliced(+)	Gm15427	531	331.994	1.45966	0	0	No Change Medium Expression	unspliced
St8sia4_chr1_95587682_95667571(-)_transcript=unspliced(-)	St8sia4	79890	79691	0.0314018	0	0	No Change Low Expression	unspliced
Gm1833_chr1_96645420_96646170(+)_transcript=unspliced(+)	Gm1833	751	551.994	0	0	0	No Change Low Expression	unspliced
Slco4c1_chr1_96816270_96872171(-)_transcript=unspliced(-)	Slco4c1	55902	55703	0.754914	1.64259	1.33562	No Change Medium Expression	unspliced
Panct2_chr1_96871126_96907796(+)_transcript=unspliced(+)	Panct2	36671	36472	0.366543	0.340946	0.294356	No Change Medium Expression	unspliced
Gm28901_chr1_97024516_97025565(-)_transcript=unspliced(-)	Gm28901	1050	850.994	3.0772	0	0	No Change Medium Expression	unspliced
Gm6430_chr1_97024681_97025928(+)_transcript=unspliced(+)	Gm6430	1248	1048.99	0.385464	0	0	No Change Low Expression	unspliced
D1Ertd622e_chr1_97606318_97662074(-)_transcript=unspliced(-)	D1Ertd622e	55757	55558	0.391629	0	0	No Change Medium Expression	unspliced
Ppip5k2_chr1_97706048_97770411(-)_transcript=unspliced(-)	Ppip5k2	64364	64165	2.41041	0.00959761	0.00959761	No Change High Expression	unspliced
Gin1_chr1_97770172_97793709(+)_transcript=unspliced(+)	Gin1	23538	23339	0.541311	0.609263	0.442498	No Change Medium Expression	unspliced
Pam_chr1_97795114_98095646(-)_transcript=unspliced(-)	Pam	300533	300334	0.38837	3.09356	2.5183	No Change Medium Expression	unspliced
Gm3531_chr1_97948901_97949389(-)_transcript=unspliced(-)	Gm3531	489	289.994	1.24262	0	0	No Change Medium Expression	unspliced
B230216N24Rik_chr1_98031116_98057680(-)_transcript=unspliced(-)	B230216N24Rik	26565	26366	0.338185	0.083652	0.083652	No Change Low Expression	unspliced
Gm3555_chr1_98457768_98459162(+)_transcript=unspliced(+)	Gm3555	1395	1195.99	0.458982	0	0	No Change Low Expression	unspliced
Gm29668_chr1_100282329_100282643(-)_transcript=unspliced(-)	Gm29668	315	117.392	2.27823	0	0	No Change Medium Expression	unspliced
Gm29667_chr1_100282791_100283280(+)_transcript=unspliced(+)	Gm29667	490	290.994	0.409697	0	0	No Change Low Expression	unspliced
Psmb6-ps2_chr1_101385886_101386590(+)_transcript=unspliced(+)	Psmb6-ps2	705	505.994	0.164536	0	0	No Change Low Expression	unspliced
Pign_chr1_105518422_105663677(-)_transcript=unspliced(-)	Pign	145256	145057	1.7305	12.5012	7.95165	No Change Medium Expression	unspliced
Relch_chr1_105663861_105755191(+)_transcript=unspliced(+)	Relch	91331	91132	2.51429	3.71725	2.47402	No Change Medium Expression	unspliced
Tnfrsf11a_chr1_105780718_105847981(+)_transcript=unspliced(+)	Tnfrsf11a	67264	67065	0.28597	0.81016	0.733395	No Change Low Expression	unspliced
Gm7160_chr1_105979350_105990282(-)_transcript=unspliced(-)	Gm7160	10933	10734	0.980462	0	0	No Change Low Expression	unspliced
Zcchc2_chr1_105990406_106034074(+)_transcript=unspliced(+)	Zcchc2	43669	43470	3.08049	0	0	No Change Medium Expression	unspliced
Phlpp1_chr1_106171752_106394250(+)_transcript=unspliced(+)	Phlpp1	222499	222300	1.73224	6.46713	4.80539	No Change Medium Expression	unspliced
Gm38235_chr1_106219314_106224265(+)_transcript=unspliced(+)	Gm38235	4952	4752.99	0.371294	0	0	No Change Low Expression	unspliced
Bcl2_chr1_106538178_106714274(-)_transcript=unspliced(-)	Bcl2	176097	175898	0.386338	1.48186	1.40042	No Change Low Expression	unspliced
Kdsr_chr1_106720459_106759727(-)_transcript=unspliced(-)	Kdsr	39269	39070	3.22533	0.019219	0.0038622	No Change Medium Expression	unspliced
Vps4b_chr1_106764071_106796728(-)_transcript=unspliced(-)	Vps4b	32658	32459	3.71718	11.318	8.59972	No Change High Expression	unspliced
Serpinb8_chr1_107590006_107610484(+)_transcript=unspliced(+)	Serpinb8	20479	20280	0.084634	0	0	No Change Low Expression	unspliced
Gm8141_chr1_109833024_109834746(+)_transcript=unspliced(+)	Gm8141	1723	1523.99	0.493708	0	0	No Change Low Expression	unspliced
Dsel_chr1_111858702_111864918(-)_transcript=unspliced(-)	Dsel	6217	6017.99	1.02628	0	0	No Change Medium Expression	unspliced
Gm6028_chr1_111880735_111881308(-)_transcript=unspliced(-)	Gm6028	574	374.994	0.683915	0	0	No Change Low Expression	unspliced
9330185C12Rik_chr1_113891385_113964134(-)_transcript=unspliced(-)	9330185C12Rik	72750	72551	2.94818	31.3156	23.5168	No Change Low Expression	unspliced
Tsn_chr1_118294778_118311739(-)_transcript=unspliced(-)	Tsn	16962	16763	4.84865	0	0	No Change High Expression	unspliced
Nifk_chr1_118321839_118333822(+)_transcript=unspliced(+)	Nifk	11984	11785	3.27508	0	0	No Change High Expression	unspliced
Clasp1_chr1_118389058_118612678(+)_transcript=unspliced(+)	Clasp1	223621	223422	3.0708	4.5856	2.94159	No Change High Expression	unspliced
Tfcp2l1_chr1_118627945_118685168(+)_transcript=unspliced(+)	Tfcp2l1	57224	57025	5.21644	21.9894	18.759	No Change High Expression	unspliced
Gli2_chr1_118834132_119053619(-)_transcript=unspliced(-)	Gli2	219488	219289	5.29001	62.3492	46.413	No Change Medium Expression	unspliced
Inhbb_chr1_119415465_119422248(-)_transcript=unspliced(-)	Inhbb	6784	6584.99	0.131019	0	0	No Change Low Expression	unspliced
Ralb_chr1_119470305_119504794(-)_transcript=unspliced(-)	Ralb	34490	34291	0.727453	0	-0.0154006	No Change High Expression	unspliced
Tmem185b_chr1_119526160_119528983(+)_transcript=unspliced(+)	Tmem185b	2824	2624.99	3.66061	0	0	No Change Medium Expression	unspliced
3830432H09Rik_chr1_119529480_119536165(-)_transcript=unspliced(-)	3830432H09Rik	6686	6486.99	0.853189	0	0	No Change Low Expression	unspliced
Epb41l5_chr1_119545037_119649000(-)_transcript=unspliced(-)	Epb41l5	103964	103765	2.63306	4.09247	2.92176	No Change Medium Expression	unspliced
Ptpn4_chr1_119652467_119837613(-)_transcript=unspliced(-)	Ptpn4	185147	184948	2.44696	45.8296	38.3215	No Change Medium Expression	unspliced
Gm3851_chr1_119787769_119788086(+)_transcript=unspliced(+)	Gm3851	318	120.207	0.417815	0	0	No Change Low Expression	unspliced
Tmem177_chr1_119907890_119913208(-)_transcript=unspliced(-)	Tmem177	5319	5119.99	0.418791	0	0	No Change Medium Expression	unspliced
Tmem37_chr1_120067377_120074074(-)_transcript=unspliced(-)	Tmem37	6698	6498.99	0.445938	0	0	No Change Medium Expression	unspliced
Dbi_chr1_120113280_120121078(-)_transcript=unspliced(-)	Dbi	7799	7599.99	1.74486	0	0	No Change High Expression	unspliced
3110009E18Rik_chr1_120121187_120188189(+)_transcript=unspliced(+)	3110009E18Rik	67003	66804	0.526477	0.28868	0.262929	No Change Medium Expression	unspliced
Steap3_chr1_120190757_120272705(-)_transcript=unspliced(-)	Steap3	81949	81750	0.213487	0.231988	0.231988	No Change Medium Expression	unspliced
En1_chr1_120602418_120607992(+)_transcript=unspliced(+)	En1	5575	5375.99	0.112283	0	0	No Change Low Expression	unspliced
Insig2_chr1_121304353_121332589(-)_transcript=unspliced(-)	Insig2	28237	28038	0.765534	0.940566	0.648944	No Change Medium Expression	unspliced
Gm37174_chr1_121328092_121331149(+)_transcript=unspliced(+)	Gm37174	3058	2858.99	0.144871	0	0	No Change Low Expression	unspliced
Ccdc93_chr1_121431049_121506460(+)_transcript=unspliced(+)	Ccdc93	75412	75213	0.666661	0.0288577	0.0288577	No Change Medium Expression	unspliced
Ddx18_chr1_121553835_121567989(-)_transcript=unspliced(-)	Ddx18	14155	13956	2.96441	0.0820944	0.0280799	No Change High Expression	unspliced
Gm8392_chr1_122190221_122191055(+)_transcript=unspliced(+)	Gm8392	835	635.994	0.130524	0	0	No Change Low Expression	unspliced
Actr3_chr1_125392905_125435727(-)_transcript=unspliced(-)	Actr3	42823	42624	4.24392	0	0	No Change High Expression	unspliced
Slc35f5_chr1_125560595_125595820(+)_transcript=unspliced(+)	Slc35f5	35226	35027	0.570987	0	0	No Change Medium Expression	unspliced
Gpr39_chr1_125676995_125873862(+)_transcript=unspliced(+)	Gpr39	196868	196669	0.0999149	0.00959838	0.00959838	No Change Low Expression	unspliced
Lypd1_chr1_125867622_125913101(-)_transcript=unspliced(-)	Lypd1	45480	45281	0.189876	0	0	No Change Low Expression	unspliced
Mgat5_chr1_127205015_127488336(+)_transcript=unspliced(+)	Mgat5	283322	283123	0.894551	9.22852	5.82706	No Change Medium Expression	unspliced
Ccnt2_chr1_127774164_127808061(+)_transcript=unspliced(+)	Ccnt2	33898	33699	12.3052	0	0	No Change High Expression	unspliced
Rab3gap1_chr1_127868773_127943868(+)_transcript=unspliced(+)	Rab3gap1	75096	74897	1.85041	0.917498	0.608231	No Change Medium Expression	unspliced
Zranb3_chr1_127954184_128103047(-)_transcript=unspliced(-)	Zranb3	148864	148665	3.39104	24.9377	16.5241	No Change High Expression	unspliced
Gm38248_chr1_127978905_127984687(-)_transcript=unspliced(-)	Gm38248	5783	5583.99	2.5252	0	0	No Change Medium Expression	unspliced
Rpl28-ps1_chr1_128038569_128038982(+)_transcript=unspliced(+)	Rpl28-ps1	414	214.996	377.849	0	0	No Change High Expression	unspliced
Gm37625_chr1_128084460_128089331(-)_transcript=unspliced(-)	Gm37625	4872	4672.99	1.47656	0	0	No Change Medium Expression	unspliced
R3hdm1_chr1_128103301_128237736(+)_transcript=unspliced(+)	R3hdm1	134436	134237	4.72373	0.297841	0.20553	No Change High Expression	unspliced
Ubxn4_chr1_128243964_128279378(+)_transcript=unspliced(+)	Ubxn4	35415	35216	1.83498	0.416275	0.239541	No Change High Expression	unspliced
Lct_chr1_128284756_128328318(-)_transcript=unspliced(-)	Lct	43563	43364	0.275705	0	0	No Change Low Expression	unspliced
Mcm6_chr1_128331590_128359664(-)_transcript=unspliced(-)	Mcm6	28075	27876	5.78371	0	0	No Change High Expression	unspliced
Dars_chr1_128363707_128417368(-)_transcript=unspliced(-)	Dars	53662	53463	3.83476	1.56577	0.963542	No Change High Expression	unspliced
Gm6170_chr1_128520073_128521460(-)_transcript=unspliced(-)	Gm6170	1388	1188.99	4.13455	0	0	No Change Medium Expression	unspliced
Cxcr4_chr1_128588199_128592293(-)_transcript=unspliced(-)	Cxcr4	4095	3895.99	0.0726273	0	0	No Change Medium Expression	unspliced
Cd55b_chr1_130388537_130423009(-)_transcript=unspliced(-)	Cd55b	34473	34274	0.103762	0	0	No Change Low Expression	unspliced
Gm15675_chr1_130429781_130437191(-)_transcript=unspliced(-)	Gm15675	7411	7211.99	0.701202	0	0	No Change Low Expression	unspliced
Cd55_chr1_130439027_130462744(-)_transcript=unspliced(-)	Cd55	23718	23519	1.29977	0.0287928	-0.0172528	No Change Medium Expression	unspliced
Pfkfb2_chr1_130689182_130729253(-)_transcript=unspliced(-)	Pfkfb2	40072	39873	0.903538	3.51243	2.7757	No Change Medium Expression	unspliced
Yod1_chr1_130717327_130724358(+)_transcript=unspliced(+)	Yod1	7032	6832.99	1.1523	0.121344	0.121344	No Change Medium Expression	unspliced
AA986860_chr1_130731976_130744622(+)_transcript=unspliced(+)	AA986860	12647	12448	0.289223	0	0	No Change Low Expression	unspliced
Mapkapk2_chr1_131053700_131097826(-)_transcript=unspliced(-)	Mapkapk2	44127	43928	1.53229	6.60972	5.48928	No Change High Expression	unspliced
Gm37084_chr1_131086252_131092149(-)_transcript=unspliced(-)	Gm37084	5898	5698.99	0.207725	0	0	No Change Low Expression	unspliced
Dyrk3_chr1_131127455_131138340(-)_transcript=unspliced(-)	Dyrk3	10886	10687	2.85587	0	0	No Change High Expression	unspliced
Eif2d_chr1_131153181_131187658(+)_transcript=unspliced(+)	Eif2d	34478	34279	3.57313	22.1078	18.6771	No Change High Expression	unspliced
Rassf5_chr1_131176410_131245258(-)_transcript=unspliced(-)	Rassf5	68849	68650	0.0848052	0	0	No Change Medium Expression	unspliced
Ikbke_chr1_131254343_131279606(-)_transcript=unspliced(-)	Ikbke	25264	25065	0.135347	0.143964	0.0785498	No Change Low Expression	unspliced
Srgap2_chr1_131285251_131527352(-)_transcript=unspliced(-)	Srgap2	242102	241903	3.61479	32.1209	21.616	No Change High Expression	unspliced
Gm37954_chr1_131376461_131378531(-)_transcript=unspliced(-)	Gm37954	2071	1871.99	0.414357	0	0	No Change Low Expression	unspliced
Gm29488_chr1_131406812_131409213(-)_transcript=unspliced(-)	Gm29488	2402	2202.99	0.956348	0	0	No Change Low Expression	unspliced
Fam72a_chr1_131527903_131539872(+)_transcript=unspliced(+)	Fam72a	11970	11771	1.05161	0	0	No Change Medium Expression	unspliced
Rab7b_chr1_131688695_131715439(+)_transcript=unspliced(+)	Rab7b	26745	26546	0.0369813	0	0	No Change Low Expression	unspliced
Slc26a9_chr1_131744022_131771504(+)_transcript=unspliced(+)	Slc26a9	27483	27284	0.0696206	0	0	No Change Low Expression	unspliced
Pm20d1_chr1_131797381_131821473(+)_transcript=unspliced(+)	Pm20d1	24093	23894	0.767287	1.81004	1.3842	No Change Low Expression	unspliced
Slc41a1_chr1_131827493_131848865(+)_transcript=unspliced(+)	Slc41a1	21373	21174	1.35686	0	0	No Change Medium Expression	unspliced
Rab29_chr1_131867224_131872887(+)_transcript=unspliced(+)	Rab29	5664	5464.99	0.247683	0	0	No Change Medium Expression	unspliced
Nucks1_chr1_131910534_131936321(+)_transcript=unspliced(+)	Nucks1	25788	25589	10.004	4.47211	2.32035	No Change High Expression	unspliced
Gm38067_chr1_131914529_131916439(+)_transcript=unspliced(+)	Gm38067	1911	1711.99	3.3761	0	0	No Change Medium Expression	unspliced
Slc45a3_chr1_131962967_131982969(+)_transcript=unspliced(+)	Slc45a3	20003	19804	0.278834	0	0	No Change Low Expression	unspliced
Elk4_chr1_132007607_132032612(+)_transcript=unspliced(+)	Elk4	25006	24807	4.80414	0	0	No Change Medium Expression	unspliced
Mfsd4a_chr1_132022806_132068062(-)_transcript=unspliced(-)	Mfsd4a	45257	45058	0.0365544	0	0	No Change Low Expression	unspliced
Cdk18_chr1_132112237_132139684(-)_transcript=unspliced(-)	Cdk18	27448	27249	0.760207	0.163665	0.163665	No Change Medium Expression	unspliced
Lemd1_chr1_132191431_132259227(+)_transcript=unspliced(+)	Lemd1	67797	67598	0.174495	1.39376	1.39376	No Change Low Expression	unspliced
Nuak2_chr1_132316126_132333488(+)_transcript=unspliced(+)	Nuak2	17363	17164	1.25812	0.374307	0.358959	No Change Medium Expression	unspliced
Tmcc2_chr1_132356315_132391281(-)_transcript=unspliced(-)	Tmcc2	34967	34768	1.04759	0	-0.0153485	No Change Medium Expression	unspliced
Dstyk_chr1_132417555_132466958(+)_transcript=unspliced(+)	Dstyk	49404	49205	1.6183	0.00959761	0.00959761	No Change Medium Expression	unspliced
6030442K20Rik_chr1_132466433_132477064(-)_transcript=unspliced(-)	6030442K20Rik	10632	10433	1.82395	2.75387	2.13744	No Change Low Expression	unspliced
Rbbp5_chr1_132477365_132505659(+)_transcript=unspliced(+)	Rbbp5	28295	28096	4.74709	0	0	No Change High Expression	unspliced
Tmem81_chr1_132506230_132508639(+)_transcript=unspliced(+)	Tmem81	2410	2210.99	6.91355	0	0	No Change Medium Expression	unspliced
Cntn2_chr1_132509427_132543256(-)_transcript=unspliced(-)	Cntn2	33830	33631	0.150397	0	0	No Change Medium Expression	unspliced
Nfasc_chr1_132564690_132741797(-)_transcript=unspliced(-)	Nfasc	177108	176909	1.87058	67.4921	46.9298	No Change Medium Expression	unspliced
Lrrn2_chr1_132880273_132940005(+)_transcript=unspliced(+)	Lrrn2	59733	59534	0.379243	0.604836	0.466699	No Change Low Expression	unspliced
Mdm4_chr1_132959484_133030561(-)_transcript=unspliced(-)	Mdm4	71078	70879	14.0199	0.0191952	0.0191952	No Change High Expression	unspliced
Gm29257_chr1_133025801_133026439(+)_transcript=unspliced(+)	Gm29257	639	439.994	3.5802	0	0	No Change Medium Expression	unspliced
Pik3c2b_chr1_133045667_133108687(+)_transcript=unspliced(+)	Pik3c2b	63021	62822	1.06353	2.31302	1.36129	Up	unspliced
Gm26616_chr1_133128676_133131782(-)_transcript=unspliced(-)	Gm26616	3107	2907.99	0.128187	0	0	No Change Low Expression	unspliced
Ppp1r15b_chr1_133131143_133139783(+)_transcript=unspliced(+)	Ppp1r15b	8641	8441.99	2.65546	0	0	No Change High Expression	unspliced
Plekha6_chr1_133164210_133303435(+)_transcript=unspliced(+)	Plekha6	139226	139027	0.440279	0.206362	0.14387	No Change Medium Expression	unspliced
Ren1_chr1_133350510_133360325(+)_transcript=unspliced(+)	Ren1	9816	9616.99	0.0285195	0	0	No Change Low Expression	unspliced
Etnk2_chr1_133363572_133380336(+)_transcript=unspliced(+)	Etnk2	16765	16566	0.309901	0	0	No Change Low Expression	unspliced
Sox13_chr1_133382303_133424377(-)_transcript=unspliced(-)	Sox13	42075	41876	2.4627	0	-0.0153485	No Change Medium Expression	unspliced
Snrpe_chr1_133603871_133610291(-)_transcript=unspliced(-)	Snrpe	6421	6221.99	6.64412	0	0	No Change High Expression	unspliced
Gm38394_chr1_133619940_133661318(-)_transcript=unspliced(-)	Gm38394	41379	41180	2.98723	3.11442	1.84534	No Change High Expression	unspliced
Lax1_chr1_133679091_133690108(-)_transcript=unspliced(-)	Lax1	11018	10819	0.325331	1.27316	0.949018	No Change Low Expression	unspliced
Atp2b4_chr1_133699457_133801041(-)_transcript=unspliced(-)	Atp2b4	101585	101386	0.275227	0	0	No Change Medium Expression	unspliced
Btg2_chr1_134075170_134079120(-)_transcript=unspliced(-)	Btg2	3951	3751.99	5.10597	0	0	No Change High Expression	unspliced
Gm8618_chr1_134109368_134109799(+)_transcript=unspliced(+)	Gm8618	432	232.994	3.12204	0	0	No Change Medium Expression	unspliced
Chit1_chr1_134111242_134151540(+)_transcript=unspliced(+)	Chit1	40299	40100	0.0569703	0	0	No Change Low Expression	unspliced
Chil1_chr1_134182176_134190181(+)_transcript=unspliced(+)	Chil1	8006	7806.99	0.0249785	0	0	No Change Low Expression	unspliced
Adora1_chr1_134199223_134235431(-)_transcript=unspliced(-)	Adora1	36209	36010	0.0909251	0	0	No Change Low Expression	unspliced
Ppfia4_chr1_134296783_134332928(-)_transcript=unspliced(-)	Ppfia4	36146	35947	1.74484	0	0	Up	unspliced
Tmem183a_chr1_134346097_134361979(-)_transcript=unspliced(-)	Tmem183a	15883	15684	5.24363	0	0	No Change High Expression	unspliced
Cyb5r1_chr1_134405559_134411740(+)_transcript=unspliced(+)	Cyb5r1	6182	5982.99	10.6248	0	0	No Change High Expression	unspliced
Adipor1_chr1_134415378_134433351(+)_transcript=unspliced(+)	Adipor1	17974	17775	4.36903	3.65289	2.17943	No Change High Expression	unspliced
Platr1_chr1_134435628_134439597(+)_transcript=unspliced(+)	Platr1	3970	3770.99	2.15602	0	0	No Change Low Expression	unspliced
Klhl12_chr1_134455531_134491018(+)_transcript=unspliced(+)	Klhl12	35488	35289	2.7149	0.37915	0.118225	No Change High Expression	unspliced
Rabif_chr1_134494648_134508774(+)_transcript=unspliced(+)	Rabif	14127	13928	2.89823	0.0383904	0.0383904	No Change Medium Expression	unspliced
Gm15454_chr1_134518081_134518563(+)_transcript=unspliced(+)	Gm15454	483	283.994	155.041	0	0	No Change High Expression	unspliced
Mgat4e_chr1_134540941_134549682(-)_transcript=unspliced(-)	Mgat4e	8742	8542.99	0.391307	1.13366	0.82669	No Change Medium Expression	unspliced
Kdm5b_chr1_134560171_134635285(+)_transcript=unspliced(+)	Kdm5b	75115	74916	11.233	0	0	Up	unspliced
Ppp1r12b_chr1_134754658_134955942(-)_transcript=unspliced(-)	Ppp1r12b	201285	201086	1.11391	11.9984	9.75222	No Change Medium Expression	unspliced
Gm37677_chr1_134819916_134827549(-)_transcript=unspliced(-)	Gm37677	7634	7434.99	0.701408	2.77263	2.20789	No Change Low Expression	unspliced
Ube2t_chr1_134962565_134974162(+)_transcript=unspliced(+)	Ube2t	11598	11399	4.14607	0	0	No Change High Expression	unspliced
Ptprv_chr1_135108497_135132594(-)_transcript=unspliced(-)	Ptprv	24098	23899	0.283907	0	0	No Change Medium Expression	unspliced
Gm10535_chr1_135108961_135113378(+)_transcript=unspliced(+)	Gm10535	4418	4218.99	0.308955	0	0	No Change Low Expression	unspliced
Ptpn7_chr1_135132700_135145317(+)_transcript=unspliced(+)	Ptpn7	12618	12419	0.0611278	0	0	No Change Low Expression	unspliced
Arl8a_chr1_135146824_135156269(+)_transcript=unspliced(+)	Arl8a	9446	9246.99	2.6951	0.0959761	0.0959761	No Change High Expression	unspliced
Gm4204_chr1_135231995_135233225(+)_transcript=unspliced(+)	Gm4204	1231	1031.99	115.717	0	0	No Change High Expression	unspliced
Elf3_chr1_135253575_135258568(-)_transcript=unspliced(-)	Elf3	4994	4794.99	0.929692	0	0	Up	unspliced
Rnpep_chr1_135262712_135284084(-)_transcript=unspliced(-)	Rnpep	21373	21174	1.61295	0	0	No Change Medium Expression	unspliced
Timm17a_chr1_135295213_135313778(-)_transcript=unspliced(-)	Timm17a	18566	18367	2.27685	0	0	No Change Medium Expression	unspliced
Lmod1_chr1_135324807_135368065(+)_transcript=unspliced(+)	Lmod1	43259	43060	0.0978713	0	0	No Change Low Expression	unspliced
Shisa4_chr1_135371057_135375237(-)_transcript=unspliced(-)	Shisa4	4181	3981.99	0.616122	0	0	No Change Medium Expression	unspliced
Ipo9_chr1_135382312_135430499(-)_transcript=unspliced(-)	Ipo9	48188	47989	4.09158	0.404574	0.311984	No Change High Expression	unspliced
Nav1_chr1_135434580_135688105(-)_transcript=unspliced(-)	Nav1	253526	253327	1.54242	17.7262	12.7051	No Change Medium Expression	unspliced
Csrp1_chr1_135720061_135752232(+)_transcript=unspliced(+)	Csrp1	32172	31973	1.25385	0	0	No Change High Expression	unspliced
Phlda3_chr1_135766119_135769136(+)_transcript=unspliced(+)	Phlda3	3018	2818.99	3.65538	0	0	No Change High Expression	unspliced
Tnni1_chr1_135779434_135810989(+)_transcript=unspliced(+)	Tnni1	31556	31357	0.0394953	0	0	No Change Low Expression	unspliced
Lad1_chr1_135818598_135833342(+)_transcript=unspliced(+)	Lad1	14745	14546	0.393184	0	0	No Change Medium Expression	unspliced
Tnnt2_chr1_135836354_135852260(+)_transcript=unspliced(+)	Tnnt2	15907	15708	0.0379723	0	0	No Change Low Expression	unspliced
Gm28883_chr1_135869782_135870150(+)_transcript=unspliced(+)	Gm28883	369	170.057	0.243556	0	0	No Change Low Expression	unspliced
Tmem9_chr1_136008150_136035342(+)_transcript=unspliced(+)	Tmem9	27193	26994	0.787336	0.0986299	0.0525843	No Change Medium Expression	unspliced
Kif21b_chr1_136131389_136177998(+)_transcript=unspliced(+)	Kif21b	46610	46411	0.274763	0.153578	0.153578	Up	unspliced
Inava_chr1_136213531_136234264(-)_transcript=unspliced(-)	Inava	20734	20535	1.62275	5.05862	3.34519	No Change Medium Expression	unspliced
Camsap2_chr1_136268123_136346104(-)_transcript=unspliced(-)	Camsap2	77982	77783	1.70013	0.70352	0.565383	No Change Medium Expression	unspliced
Ddx59_chr1_136415271_136440158(+)_transcript=unspliced(+)	Ddx59	24888	24689	0.972515	0	0	No Change High Expression	unspliced
Kif14_chr1_136466343_136531511(+)_transcript=unspliced(+)	Kif14	65169	64970	2.65658	9.78928	8.06441	No Change High Expression	unspliced
Gm29486_chr1_136507409_136507780(+)_transcript=unspliced(+)	Gm29486	372	173.045	0.82586	1.0571	0.813821	No Change Low Expression	unspliced
Platr23_chr1_136622098_136624650(-)_transcript=unspliced(-)	Platr23	2553	2353.99	0	0	0	No Change Low Expression	unspliced
Zfp281_chr1_136624901_136630053(+)_transcript=unspliced(+)	Zfp281	5153	4953.99	0	0	0	No Change High Expression	unspliced
Gm19705_chr1_136670769_136690804(+)_transcript=unspliced(+)	Gm19705	20036	19837	2.78441	19.4121	12.9059	No Change Medium Expression	unspliced
Platr22_chr1_136696211_136726142(+)_transcript=unspliced(+)	Platr22	29932	29733	17.0934	17.6102	11.2088	No Change Medium Expression	unspliced
Gm8762_chr1_136789182_136789520(-)_transcript=unspliced(-)	Gm8762	339	140.402	0.299057	0	0	No Change Low Expression	unspliced
Gm29718_chr1_136793034_136793510(+)_transcript=unspliced(+)	Gm29718	477	277.994	0.309379	0	0	No Change Low Expression	unspliced
Nr5a2_chr1_136842571_136960448(-)_transcript=unspliced(-)	Nr5a2	117878	117679	2.8194	0.00959761	0.00959761	No Change Medium Expression	unspliced
Nek7_chr1_138482875_138620141(-)_transcript=unspliced(-)	Nek7	137267	137068	1.77306	0.00962679	0.00962679	No Change Medium Expression	unspliced
2310009B15Rik_chr1_138851983_138856852(-)_transcript=unspliced(-)	2310009B15Rik	4870	4670.99	0.612106	0	0	No Change Medium Expression	unspliced
Dennd1b_chr1_138963435_139178960(+)_transcript=unspliced(+)	Dennd1b	215526	215327	1.95638	13.9835	10.9443	Down	unspliced
Gm37423_chr1_138968510_138971851(+)_transcript=unspliced(+)	Gm37423	3342	3142.99	0.501643	0	0	No Change Low Expression	unspliced
Gm16305_chr1_138991514_138992069(-)_transcript=unspliced(-)	Gm16305	556	356.994	0.352651	0	0	No Change Low Expression	unspliced
Gm37470_chr1_139030185_139032982(+)_transcript=unspliced(+)	Gm37470	2798	2598.99	0.599506	1.27367	1.00806	No Change Low Expression	unspliced
Zbtb41_chr1_139422288_139453005(+)_transcript=unspliced(+)	Zbtb41	30718	30519	1.7698	2.65407	2.20211	No Change Medium Expression	unspliced
Aspm_chr1_139454772_139494091(+)_transcript=unspliced(+)	Aspm	39320	39121	2.03046	0.0395623	-0.0065878	No Change High Expression	unspliced
Gm5837_chr1_139928240_139929608(-)_transcript=unspliced(-)	Gm5837	1369	1169.99	9.83717	0	0	No Change Medium Expression	unspliced
Kcnt2_chr1_140246158_140612067(+)_transcript=unspliced(+)	Kcnt2	365910	365711	0.658161	7.56228	6.29961	No Change Medium Expression	unspliced
Gm37777_chr1_140266487_140269852(+)_transcript=unspliced(+)	Gm37777	3366	3166.99	1.0572	0	0	No Change Medium Expression	unspliced
Gm5835_chr1_143093347_143094616(-)_transcript=unspliced(-)	Gm5835	1270	1070.99	16.5156	0.00627048	0.00627048	No Change High Expression	unspliced
Cdc73_chr1_143598800_143702893(-)_transcript=unspliced(-)	Cdc73	104094	103895	4.47976	37.2971	33.4008	Down	unspliced
Gm6397_chr1_143683230_143684298(+)_transcript=unspliced(+)	Gm6397	1069	869.994	0.575982	0	0	No Change Low Expression	unspliced
Glrx2_chr1_143716338_143749676(+)_transcript=unspliced(+)	Glrx2	33339	33140	0.425311	0	0	No Change High Expression	unspliced
Ro60_chr1_143750790_143777068(-)_transcript=unspliced(-)	Ro60	26279	26080	0.613309	0.412698	0.351304	No Change Medium Expression	unspliced
Uchl5_chr1_143777272_143807466(+)_transcript=unspliced(+)	Uchl5	30195	29996	3.78451	0.00960347	-0.00574613	No Change High Expression	unspliced
Gm29170_chr1_143777642_143781307(+)_transcript=unspliced(+)	Gm29170	3666	3466.99	1.57223	0	0	No Change Medium Expression	unspliced
Rgs2_chr1_143999338_144004161(-)_transcript=unspliced(-)	Rgs2	4824	4624.99	0	0	0	No Change Low Expression	unspliced
Gm7266_chr1_144312032_144312436(-)_transcript=unspliced(-)	Gm7266	405	205.998	0.201063	0	0	No Change Low Expression	unspliced
Gm8856_chr1_144952928_144954071(+)_transcript=unspliced(+)	Gm8856	1144	944.994	0.131984	0	0	No Change Low Expression	unspliced
Gm15443_chr1_149025228_149026047(-)_transcript=unspliced(-)	Gm15443	820	620.994	3.07285	0	0	No Change Medium Expression	unspliced
Pla2g4a_chr1_149829618_149961290(-)_transcript=unspliced(-)	Pla2g4a	131673	131474	0.0757992	0	0	No Change Medium Expression	unspliced
Ptgs2_chr1_150100031_150108227(+)_transcript=unspliced(+)	Ptgs2	8197	7997.99	0.0423204	0	0	No Change Low Expression	unspliced
Gm9687_chr1_150145968_150146569(+)_transcript=unspliced(+)	Gm9687	602	402.994	0.983547	0	0	No Change Low Expression	unspliced
Rbm3-ps_chr1_150265535_150265999(-)_transcript=unspliced(-)	Rbm3-ps	465	265.994	45.7047	0	0	No Change High Expression	unspliced
Odr4_chr1_150361305_150393080(-)_transcript=unspliced(-)	Odr4	31776	31577	1.00511	0	0	No Change Medium Expression	unspliced
Tpr_chr1_150392838_150449935(+)_transcript=unspliced(+)	Tpr	57098	56899	3.6942	9.67209	6.30211	No Change High Expression	unspliced
Hmcn1_chr1_150562524_150993435(-)_transcript=unspliced(-)	Hmcn1	430912	430713	0.100995	3.14339	2.88174	No Change Low Expression	unspliced
Ivns1abp_chr1_151344477_151364422(+)_transcript=unspliced(+)	Ivns1abp	19946	19747	6.9179	0	0	Down	unspliced
Swt1_chr1_151367699_151428455(-)_transcript=unspliced(-)	Swt1	60757	60558	2.81064	8.97055	5.43417	No Change High Expression	unspliced
Trmt1l_chr1_151428542_151458161(+)_transcript=unspliced(+)	Trmt1l	29620	29421	1.69542	3.02669	1.9088	No Change Medium Expression	unspliced
Gm37893_chr1_151445305_151447741(+)_transcript=unspliced(+)	Gm37893	2437	2237.99	1.13253	0.926224	0.753862	No Change Medium Expression	unspliced
Rnf2_chr1_151458004_151500955(-)_transcript=unspliced(-)	Rnf2	42952	42753	3.2237	0.489488	0.427065	No Change High Expression	unspliced
Gm36527_chr1_151496557_151499585(-)_transcript=unspliced(-)	Gm36527	3029	2829.99	1.46161	0	0	No Change Medium Expression	unspliced
Fam129a_chr1_151571186_151721939(+)_transcript=unspliced(+)	Fam129a	150754	150555	0.602881	1.91872	1.58105	No Change Medium Expression	unspliced
Edem3_chr1_151755371_151822051(+)_transcript=unspliced(+)	Edem3	66681	66482	1.07435	0	0	No Change Medium Expression	unspliced
1700025G04Rik_chr1_151852403_152090125(-)_transcript=unspliced(-)	1700025G04Rik	237723	237524	1.09596	8.4273	5.19845	No Change Medium Expression	unspliced
Tsen15_chr1_152370735_152386688(-)_transcript=unspliced(-)	Tsen15	15954	15755	2.02899	0	0	No Change High Expression	unspliced
Colgalt2_chr1_152399830_152510695(+)_transcript=unspliced(+)	Colgalt2	110866	110667	0.145028	0.225693	0.225693	No Change Low Expression	unspliced
Rgl1_chr1_152516760_152766351(-)_transcript=unspliced(-)	Rgl1	249592	249393	0.136626	1.38018	1.25726	No Change Medium Expression	unspliced
Gm7278_chr1_152729159_152730559(-)_transcript=unspliced(-)	Gm7278	1401	1201.99	0.401682	0	0	No Change Low Expression	unspliced
Arpc5_chr1_152766542_152775597(+)_transcript=unspliced(+)	Arpc5	9056	8856.99	2.49639	0	0	Down	unspliced
Ncf2_chr1_152800194_152836991(+)_transcript=unspliced(+)	Ncf2	36798	36599	0.106341	0.153562	0.153562	No Change Low Expression	unspliced
Smg7_chr1_152836995_152902646(-)_transcript=unspliced(-)	Smg7	65652	65453	8.57795	3.32592	1.68596	No Change High Expression	unspliced
Gm8976_chr1_152949395_152950097(-)_transcript=unspliced(-)	Gm8976	703	503.994	0.171383	0	0	No Change Low Expression	unspliced
Nmnat2_chr1_152954993_153119261(+)_transcript=unspliced(+)	Nmnat2	164269	164070	0.628265	19.457	14.7016	No Change Medium Expression	unspliced
Lamc2_chr1_153122756_153186447(-)_transcript=unspliced(-)	Lamc2	63692	63493	0.70491	0.884777	0.744667	Down	unspliced
Lamc1_chr1_153218922_153332786(-)_transcript=unspliced(-)	Lamc1	113865	113666	4.05538	0.0097721	0.0097721	No Change High Expression	unspliced
Gm8818_chr1_153305432_153306478(+)_transcript=unspliced(+)	Gm8818	1047	847.994	0.297164	0.0104128	0.0104128	No Change Low Expression	unspliced
E330020D12Rik_chr1_153404827_153414233(-)_transcript=unspliced(-)	E330020D12Rik	9407	9207.99	0.74044	0.0102567	0.0102567	No Change Medium Expression	unspliced
Shcbp1l_chr1_153425162_153452574(+)_transcript=unspliced(+)	Shcbp1l	27413	27214	0.282654	1.63159	1.47811	No Change Low Expression	unspliced
Dhx9_chr1_153455758_153487660(-)_transcript=unspliced(-)	Dhx9	31903	31704	18.5183	0	0	No Change High Expression	unspliced
Npl_chr1_153503015_153550045(-)_transcript=unspliced(-)	Npl	47031	46832	0.31833	0	0	No Change Medium Expression	unspliced
Rgs16_chr1_153740349_153745468(+)_transcript=unspliced(+)	Rgs16	5120	4920.99	0.363524	0	0	No Change Medium Expression	unspliced
Glul_chr1_153899944_153909723(+)_transcript=unspliced(+)	Glul	9780	9580.99	2.06275	0.0095979	0.0095979	No Change High Expression	unspliced
Ier5_chr1_155096361_155099636(-)_transcript=unspliced(-)	Ier5	3276	3076.99	2.54407	0	0	No Change Medium Expression	unspliced
Stx6_chr1_155158715_155208256(+)_transcript=unspliced(+)	Stx6	49542	49343	1.79721	8.28399	6.33471	No Change Medium Expression	unspliced
BC034090_chr1_155212471_155244444(-)_transcript=unspliced(-)	BC034090	31974	31775	0.406348	1.75434	1.63155	No Change Medium Expression	unspliced
Xpr1_chr1_155275701_155417415(-)_transcript=unspliced(-)	Xpr1	141715	141516	0.722875	1.45797	1.151	No Change Medium Expression	unspliced
Acbd6_chr1_155558120_155691330(+)_transcript=unspliced(+)	Acbd6	133211	133012	1.59643	12.61	9.7394	No Change High Expression	unspliced
Qsox1_chr1_155776029_155812889(-)_transcript=unspliced(-)	Qsox1	36861	36662	0.447407	0.143965	0.143965	No Change Medium Expression	unspliced
Cep350_chr1_155844964_155973255(-)_transcript=unspliced(-)	Cep350	128292	128093	0.956485	5.76681	4.93855	No Change Medium Expression	unspliced
Gm37383_chr1_155881802_155882546(-)_transcript=unspliced(-)	Gm37383	745	545.994	0.280346	0	0	No Change Low Expression	unspliced
Tor1aip1_chr1_156004599_156036480(-)_transcript=unspliced(-)	Tor1aip1	31882	31683	1.46938	0.30375	0.004056	No Change Medium Expression	unspliced
9430034N14Rik_chr1_156026223_156030007(-)_transcript=unspliced(-)	9430034N14Rik	3785	3585.99	0.40877	0	0	No Change Low Expression	unspliced
Tor1aip2_chr1_156035403_156068861(+)_transcript=unspliced(+)	Tor1aip2	33459	33260	5.81321	0	0	No Change High Expression	unspliced
Fam163a_chr1_156075966_156205026(-)_transcript=unspliced(-)	Fam163a	129061	128862	0.165655	0.750001	0.611765	No Change Low Expression	unspliced
Tdrd5_chr1_156255296_156303664(-)_transcript=unspliced(-)	Tdrd5	48369	48170	0.77786	0	0	No Change Medium Expression	unspliced
Axdnd1_chr1_156323509_156421159(-)_transcript=unspliced(-)	Axdnd1	97651	97452	0.150655	0.00536448	0.00536448	No Change Low Expression	unspliced
Gm2000_chr1_156366040_156366484(+)_transcript=unspliced(+)	Gm2000	445	245.994	854.184	0	0	No Change High Expression	unspliced
Soat1_chr1_156424525_156474331(-)_transcript=unspliced(-)	Soat1	49807	49608	1.76603	0	0	No Change High Expression	unspliced
Csnk2a3_chr1_156524012_156526644(+)_transcript=unspliced(+)	Csnk2a3	2633	2433.99	27.1771	0	0	No Change High Expression	unspliced
Abl2_chr1_156558786_156649568(+)_transcript=unspliced(+)	Abl2	90783	90584	5.98166	41.1711	28.7599	No Change High Expression	unspliced
Gm38043_chr1_156583108_156588248(+)_transcript=unspliced(+)	Gm38043	5141	4941.99	0.890829	0	0	No Change Low Expression	unspliced
Tor3a_chr1_156653617_156674356(-)_transcript=unspliced(-)	Tor3a	20740	20541	2.08487	1.10063	0.867138	No Change Medium Expression	unspliced
Fam20b_chr1_156678532_156719086(-)_transcript=unspliced(-)	Fam20b	40555	40356	0.928672	3.13649	2.0313	No Change Medium Expression	unspliced
Gm15428_chr1_156793512_156793844(+)_transcript=unspliced(+)	Gm15428	333	134.56	0.610715	0	0	No Change Low Expression	unspliced
Ralgps2_chr1_156804166_156939626(-)_transcript=unspliced(-)	Ralgps2	135461	135262	1.74208	6.81085	4.14133	No Change Medium Expression	unspliced
Gm37802_chr1_156856217_156858859(-)_transcript=unspliced(-)	Gm37802	2643	2443.99	0.315253	0	0	No Change Low Expression	unspliced
Rasal2_chr1_157135182_157412595(-)_transcript=unspliced(-)	Rasal2	277414	277215	1.82592	60.4339	48.0944	No Change Medium Expression	unspliced
Gm6058_chr1_157383931_157384329(-)_transcript=unspliced(-)	Gm6058	399	200.001	1.98632	1.37466	1.07981	No Change Medium Expression	unspliced
Gm37060_chr1_157404325_157406721(-)_transcript=unspliced(-)	Gm37060	2397	2197.99	0.858352	0	0	No Change Low Expression	unspliced
2810025M15Rik_chr1_157412352_157420236(+)_transcript=unspliced(+)	2810025M15Rik	7885	7685.99	1.50818	0	0	No Change High Expression	unspliced
Cryzl2_chr1_157458577_157492638(+)_transcript=unspliced(+)	Cryzl2	34062	33863	0.456167	0	0	No Change Medium Expression	unspliced
Brinp2_chr1_158245269_158356326(-)_transcript=unspliced(-)	Brinp2	111058	110859	0.104161	0	0	No Change Low Expression	unspliced
Astn1_chr1_158362273_158691781(+)_transcript=unspliced(+)	Astn1	329509	329310	0.0538708	0	0	No Change Low Expression	unspliced
Cop1_chr1_159232320_159347640(+)_transcript=unspliced(+)	Cop1	115321	115122	3.51273	64.3871	52.1059	No Change Medium Expression	unspliced
4930523C07Rik_chr1_160044382_160080208(+)_transcript=unspliced(+)	4930523C07Rik	35827	35628	0.124445	0.566259	0.55091	No Change Low Expression	unspliced
Mrps14_chr1_160195215_160202170(+)_transcript=unspliced(+)	Mrps14	6956	6756.99	2.56483	0	0	No Change High Expression	unspliced
Cacybp_chr1_160202367_160212875(-)_transcript=unspliced(-)	Cacybp	10509	10310	4.88593	0	0	No Change High Expression	unspliced
4933417C20Rik_chr1_160212943_160214816(+)_transcript=unspliced(+)	4933417C20Rik	1874	1674.99	0.591203	0.56146	0.323558	No Change Low Expression	unspliced
Rabgap1l_chr1_160219174_160793211(-)_transcript=unspliced(-)	Rabgap1l	574038	573839	0.827775	26.5893	20.6745	No Change Medium Expression	unspliced
9430087J23Rik_chr1_160315344_160316495(-)_transcript=unspliced(-)	9430087J23Rik	1152	952.994	0.194572	0	0	No Change Low Expression	unspliced
Gm37529_chr1_160321686_160327078(-)_transcript=unspliced(-)	Gm37529	5393	5193.99	0.102764	0.220018	0.220018	No Change Low Expression	unspliced
Gm37212_chr1_160570161_160573810(-)_transcript=unspliced(-)	Gm37212	3650	3450.99	0.210211	0	0	No Change Low Expression	unspliced
Gpr52_chr1_160576338_160577974(-)_transcript=unspliced(-)	Gpr52	1637	1437.99	0.363792	0.537743	0.437714	No Change Low Expression	unspliced
Gm37215_chr1_160589882_160591140(-)_transcript=unspliced(-)	Gm37215	1259	1059.99	0.562969	0	0	No Change Low Expression	unspliced
Gm38302_chr1_160604115_160606190(-)_transcript=unspliced(-)	Gm38302	2076	1876.99	0.446701	0	0	No Change Low Expression	unspliced
6720464F23Rik_chr1_160608955_160612450(-)_transcript=unspliced(-)	6720464F23Rik	3496	3296.99	0.679049	0	0	No Change Low Expression	unspliced
Gm37328_chr1_160726042_160726681(-)_transcript=unspliced(-)	Gm37328	640	440.994	0.713161	0	0	No Change Low Expression	unspliced
Gm38329_chr1_160727734_160728160(-)_transcript=unspliced(-)	Gm38329	427	227.994	0.31277	0	0	No Change Low Expression	unspliced
Gm6177_chr1_160893120_160893584(+)_transcript=unspliced(+)	Gm6177	465	265.994	0.525884	0	0	No Change Low Expression	unspliced
Rc3h1_chr1_160906418_160974978(+)_transcript=unspliced(+)	Rc3h1	68561	68362	2.93549	12.113	9.92097	No Change Medium Expression	unspliced
Gm37052_chr1_160910789_160912619(+)_transcript=unspliced(+)	Gm37052	1831	1631.99	1.09554	0	0	No Change Medium Expression	unspliced
Gm37653_chr1_160915324_160918901(+)_transcript=unspliced(+)	Gm37653	3578	3378.99	0.873461	0	0	No Change Low Expression	unspliced
Zbtb37_chr1_161002922_161034849(-)_transcript=unspliced(-)	Zbtb37	31928	31729	3.19617	1.20844	0.668425	No Change Medium Expression	unspliced
Gas5_chr1_161034422_161038539(+)_transcript=unspliced(+)	Gas5	4118	3918.99	125.337	0	0	No Change High Expression	unspliced
Dars2_chr1_161040601_161070658(-)_transcript=unspliced(-)	Dars2	30058	29859	2.40784	0	0	No Change High Expression	unspliced
Cenpl_chr1_161070713_161086724(+)_transcript=unspliced(+)	Cenpl	16012	15813	3.12713	0	0	No Change Medium Expression	unspliced
Klhl20_chr1_161088375_161131511(-)_transcript=unspliced(-)	Klhl20	43137	42938	1.00156	1.32456	0.925498	No Change Medium Expression	unspliced
Ankrd45_chr1_161142691_161170498(+)_transcript=unspliced(+)	Ankrd45	27808	27609	1.84935	0.603913	0.481125	No Change Medium Expression	unspliced
Prdx6_chr1_161240112_161251219(-)_transcript=unspliced(-)	Prdx6	11108	10909	11.3388	0	0	No Change High Expression	unspliced
Gm37357_chr1_161811045_161814167(-)_transcript=unspliced(-)	Gm37357	3123	2923.99	0.184878	0	0	No Change Low Expression	unspliced
Suco_chr1_161816114_161876682(-)_transcript=unspliced(-)	Suco	60569	60370	1.70579	0.351455	0.266502	No Change High Expression	unspliced
Pigc_chr1_161969186_161973435(+)_transcript=unspliced(+)	Pigc	4250	4050.99	5.67622e-07	0	0	No Change Medium Expression	unspliced
Eef1aknmt_chr1_162532127_162548551(-)_transcript=unspliced(-)	Eef1aknmt	16425	16226	2.00101	3.95203	2.68926	No Change Medium Expression	unspliced
Vamp4_chr1_162570515_162599084(+)_transcript=unspliced(+)	Vamp4	28570	28371	1.47898	0.36471	0.349361	No Change Medium Expression	unspliced
Prrc2c_chr1_162670725_162740556(-)_transcript=unspliced(-)	Prrc2c	69832	69633	9.0573	0.00959857	0.00959857	No Change High Expression	unspliced
Gorab_chr1_163384908_163403669(-)_transcript=unspliced(-)	Gorab	18762	18563	1.15176	0	0	No Change Medium Expression	unspliced
Rpsa-ps1_chr1_163623793_163624678(+)_transcript=unspliced(+)	Rpsa-ps1	886	686.994	1.14791	0	0	No Change Medium Expression	unspliced
Kifap3_chr1_163779583_163917109(+)_transcript=unspliced(+)	Kifap3	137527	137328	0.967629	5.74565	4.46292	No Change High Expression	unspliced
Scyl3_chr1_163929100_163955126(+)_transcript=unspliced(+)	Scyl3	26027	25828	1.78245	0.748614	0.609643	No Change Medium Expression	unspliced
BC055324_chr1_163945993_163994796(-)_transcript=unspliced(-)	BC055324	48804	48605	2.88699	0.417684	0.35106	No Change High Expression	unspliced
Mettl18_chr1_163994889_163997243(+)_transcript=unspliced(+)	Mettl18	2355	2155.99	3.0854	0	0	No Change Medium Expression	unspliced
F5_chr1_164151838_164220277(+)_transcript=unspliced(+)	F5	68440	68241	0.0643421	0.0110347	0.0110347	No Change Low Expression	unspliced
Slc19a2_chr1_164249046_164265385(+)_transcript=unspliced(+)	Slc19a2	16340	16141	5.94137	0	0	No Change High Expression	unspliced
Ccdc181_chr1_164275585_164287847(+)_transcript=unspliced(+)	Ccdc181	12263	12064	0.31927	0	0	No Change Medium Expression	unspliced
Blzf1_chr1_164289800_164307489(-)_transcript=unspliced(-)	Blzf1	17690	17491	1.38461	0	0	No Change Medium Expression	unspliced
Nme7_chr1_164304121_164437725(+)_transcript=unspliced(+)	Nme7	133605	133406	1.37494	3.2152	2.11011	No Change Medium Expression	unspliced
Gm37411_chr1_164424713_164426994(+)_transcript=unspliced(+)	Gm37411	2282	2082.99	0.326584	0	0	No Change Low Expression	unspliced
Atp1b1_chr1_164437109_164458355(-)_transcript=unspliced(-)	Atp1b1	21247	21048	2.53185	0	0	No Change High Expression	unspliced
Gm32391_chr1_164462442_164463989(+)_transcript=unspliced(+)	Gm32391	1548	1348.99	0.328718	0	0	No Change Low Expression	unspliced
Gm26685_chr1_164503309_164514882(+)_transcript=unspliced(+)	Gm26685	11574	11375	0.112848	0.0114305	0.0114305	No Change Low Expression	unspliced
Sft2d2_chr1_165174337_165194438(-)_transcript=unspliced(-)	Sft2d2	20102	19903	1.21526	0	0	No Change Medium Expression	unspliced
Tiprl_chr1_165212286_165236996(-)_transcript=unspliced(-)	Tiprl	24711	24512	1.80831	0	0	No Change Medium Expression	unspliced
Gm38190_chr1_165230371_165235125(-)_transcript=unspliced(-)	Gm38190	4755	4555.99	0.609103	0	0	No Change Low Expression	unspliced
Gpr161_chr1_165295789_165326745(+)_transcript=unspliced(+)	Gpr161	30957	30758	0.607208	0	0	No Change Medium Expression	unspliced
Dcaf6_chr1_165328698_165460475(-)_transcript=unspliced(-)	Dcaf6	131778	131579	1.37468	1.21981	1.06078	No Change Medium Expression	unspliced
Gm37864_chr1_165451555_165454629(-)_transcript=unspliced(-)	Gm37864	3075	2875.99	0.147943	0	0	No Change Low Expression	unspliced
Mpc2_chr1_165460637_165481214(+)_transcript=unspliced(+)	Mpc2	20578	20379	0.636293	0	0	No Change Medium Expression	unspliced
Mpzl1_chr1_165592240_165634538(-)_transcript=unspliced(-)	Mpzl1	42299	42100	4.93297	0.0863785	0.0556815	No Change High Expression	unspliced
Rcsd1_chr1_165646516_165709757(-)_transcript=unspliced(-)	Rcsd1	63242	63043	0.116565	0.523617	0.269234	No Change Medium Expression	unspliced
Creg1_chr1_165763746_165775308(+)_transcript=unspliced(+)	Creg1	11563	11364	0.505645	0	0	No Change Medium Expression	unspliced
Cd247_chr1_165788681_165877277(+)_transcript=unspliced(+)	Cd247	88597	88398	0.0412667	0	0	No Change Low Expression	unspliced
Pou2f1_chr1_165865154_166002678(-)_transcript=unspliced(-)	Pou2f1	137525	137326	5.59235	15.0731	12.8629	No Change Medium Expression	unspliced
Dusp27_chr1_166098148_166127922(-)_transcript=unspliced(-)	Dusp27	29775	29576	2.26472	11.74	8.6341	No Change Medium Expression	unspliced
Gpa33_chr1_166130238_166166510(+)_transcript=unspliced(+)	Gpa33	36273	36074	1.64091	4.57806	3.42336	No Change Medium Expression	unspliced
Mael_chr1_166201201_166238747(-)_transcript=unspliced(-)	Mael	37547	37348	0.141846	0	0	No Change Medium Expression	unspliced
Ildr2_chr1_166254139_166316823(+)_transcript=unspliced(+)	Ildr2	62685	62486	0.123048	0.566403	0.566403	No Change Low Expression	unspliced
Tada1_chr1_166379097_166393621(+)_transcript=unspliced(+)	Tada1	14525	14326	0.82741	0	0	No Change Medium Expression	unspliced
Pogk_chr1_166384622_166409863(-)_transcript=unspliced(-)	Pogk	25242	25043	0.17543	0.0706717	0.0706717	No Change Low Expression	unspliced
Uck2_chr1_167222883_167285320(-)_transcript=unspliced(-)	Uck2	62438	62239	8.92165	0.00960011	0.00960011	No Change High Expression	unspliced
Tmco1_chr1_167308378_167333978(+)_transcript=unspliced(+)	Tmco1	25601	25402	1.25258	0.430632	0.35387	No Change High Expression	unspliced
Aldh9a1_chr1_167349991_167368532(+)_transcript=unspliced(+)	Aldh9a1	18542	18343	3.35265	0	0	No Change High Expression	unspliced
Mgst3_chr1_167371966_167393841(-)_transcript=unspliced(-)	Mgst3	21876	21677	0.613286	0	0	No Change Medium Expression	unspliced
Rxrg_chr1_167598384_167639623(+)_transcript=unspliced(+)	Rxrg	41240	41041	0.054449	0.0384205	0.0384205	No Change Low Expression	unspliced
Pbx1_chr1_168119364_168432270(-)_transcript=unspliced(-)	Pbx1	312907	312708	1.82877	32.4172	26.1509	No Change Medium Expression	unspliced
Gm37524_chr1_168335980_168337671(-)_transcript=unspliced(-)	Gm37524	1692	1492.99	0.916579	0.652032	0.444437	No Change Low Expression	unspliced
Gm38381_chr1_168348534_168350808(-)_transcript=unspliced(-)	Gm38381	2275	2075.99	0.881218	0	0	No Change Low Expression	unspliced
Nuf2_chr1_169497934_169531464(-)_transcript=unspliced(-)	Nuf2	33531	33332	1.87838	0.0298611	-0.0019446	No Change High Expression	unspliced
Hsd17b7_chr1_169949535_169969241(-)_transcript=unspliced(-)	Hsd17b7	19707	19508	0.858274	0	0	No Change Medium Expression	unspliced
3110045C21Rik_chr1_169969409_169972396(+)_transcript=unspliced(+)	3110045C21Rik	2988	2788.99	0.268225	0	0	No Change Low Expression	unspliced
Ddr2_chr1_169972307_170110762(-)_transcript=unspliced(-)	Ddr2	138456	138257	0.0439745	0.232725	0.232725	No Change Low Expression	unspliced
Uap1_chr1_170141938_170174957(-)_transcript=unspliced(-)	Uap1	33020	32821	1.7292	0	0	No Change Medium Expression	unspliced
Uhmk1_chr1_170193420_170215397(-)_transcript=unspliced(-)	Uhmk1	21978	21779	2.04755	0	0	No Change Medium Expression	unspliced
Gm7694_chr1_170298199_170306332(-)_transcript=unspliced(-)	Gm7694	8134	7934.99	0	0	0	No Change Medium Expression	unspliced
Nos1ap_chr1_170302668_170589861(-)_transcript=unspliced(-)	Nos1ap	287194	286995	0.425404	2.97028	2.31029	No Change Low Expression	unspliced
Gm7299_chr1_170630921_170631501(+)_transcript=unspliced(+)	Gm7299	581	381.994	0.44487	0	0	No Change Low Expression	unspliced
Olfml2b_chr1_170644532_170682789(+)_transcript=unspliced(+)	Olfml2b	38258	38059	0.0578666	0	0	No Change Low Expression	unspliced
Atf6_chr1_170704674_170867771(-)_transcript=unspliced(-)	Atf6	163098	162899	1.85007	17.6715	11.6974	No Change Medium Expression	unspliced
Dusp12_chr1_170873498_170885540(-)_transcript=unspliced(-)	Dusp12	12043	11844	5.21691	0.0385707	0.0385707	No Change High Expression	unspliced
Gm26620_chr1_170885065_170885881(+)_transcript=unspliced(+)	Gm26620	817	617.994	0.469146	0.0959761	0.0652791	No Change Low Expression	unspliced
Fcgr2b_chr1_170958617_170976547(-)_transcript=unspliced(-)	Fcgr2b	17931	17732	0.260242	0	0	No Change Low Expression	unspliced
Fcgr3_chr1_171051174_171064935(-)_transcript=unspliced(-)	Fcgr3	13762	13563	0.676249	0	0	No Change Medium Expression	unspliced
Cfap126_chr1_171113918_171126967(+)_transcript=unspliced(+)	Cfap126	13050	12851	0.076152	0	0	No Change Low Expression	unspliced
Sdhc_chr1_171127165_171150603(-)_transcript=unspliced(-)	Sdhc	23439	23240	1.72748	0.0192025	0.0192025	No Change High Expression	unspliced
Pcp4l1_chr1_171173262_171196268(-)_transcript=unspliced(-)	Pcp4l1	23007	22808	0.0731731	0	0	No Change Low Expression	unspliced
Nr1i3_chr1_171213970_171220701(+)_transcript=unspliced(+)	Nr1i3	6732	6532.99	0.0662342	0	0	No Change Low Expression	unspliced
Tomm40l_chr1_171216011_171222514(-)_transcript=unspliced(-)	Tomm40l	6504	6304.99	1.27723	0	0	No Change Medium Expression	unspliced
Apoa2_chr1_171225054_171226379(+)_transcript=unspliced(+)	Apoa2	1326	1126.99	0.18861	0	-0.0153485	No Change Medium Expression	unspliced
Ndufs2_chr1_171234853_171251388(-)_transcript=unspliced(-)	Ndufs2	16536	16337	2.09282	0.00961652	0.00961652	No Change High Expression	unspliced
Adamts4_chr1_171250421_171260637(+)_transcript=unspliced(+)	Adamts4	10217	10018	0.226472	0	0	No Change Low Expression	unspliced
B4galt3_chr1_171270328_171276896(+)_transcript=unspliced(+)	B4galt3	6569	6369.99	1.89828	0	0	No Change Medium Expression	unspliced
Ppox_chr1_171275990_171281186(-)_transcript=unspliced(-)	Ppox	5197	4997.99	3.37909	0	0	No Change Medium Expression	unspliced
Usp21_chr1_171281945_171287991(-)_transcript=unspliced(-)	Usp21	6047	5847.99	1.89173	0	0	No Change High Expression	unspliced
Ufc1_chr1_171288563_171295024(-)_transcript=unspliced(-)	Ufc1	6462	6262.99	1.41435	0	0	No Change High Expression	unspliced
Gm20045_chr1_171320601_171326177(-)_transcript=unspliced(-)	Gm20045	5577	5377.99	1.61121	0.640403	0.36413	No Change Medium Expression	unspliced
Dedd_chr1_171329145_171342331(+)_transcript=unspliced(+)	Dedd	13187	12988	3.68938	0	0	No Change High Expression	unspliced
[truncated: 16,781 more rows]

## Sheet: 3_R_Spliced_Up
gene_ID	Gene_Identifier	length	eff_length	tpm_fl_safb_rep1	tpm_fl_safb_rep2	tpm_dd3del_rep1	tpm_dd3del_rep2	tpm_gfp_rep1	tpm_gfp_rep2	fl.av.tpm	av.fl1	av.fl2	av.dd3.1	av.dd3.2	av.gfp1	av.gfp2
[truncated: 424 more rows]

[truncated: 7 more sheets: 4_R_Spliced_Down, 5_R_Unspliced_Up, 6_R_Unspliced_Down, 7_R_Pasini_Spliced_Up, 8_R_Pasini_Spliced_Down, 9_R_Pasini_Unspliced_Up, 10_R_Pasini_Unspliced_Down]
