# Supplementary material
Source: HighWire-hosted journal article supplement (doi:10.1101/rna.079569.122)
Supplement: Supplemental_Table_S6.xlsx [file Supplemental_Table_S6.xlsx]

## Sheet: Legend
RI		SE		MXE		A5SS		A3SS
Gene Identifier		Gene Identifier		Gene Identifier		Gene Identifier		Gene Identifier
Transcript Identifier		Transcript Identifier		Transcript Identifier		Transcript Identifier		Transcript Identifier
Strand		Strand		Strand		Strand		Strand
Chr		Chr		Chr		Chr		Chr
Upstream Exon End		Upstream Exon End		Upstream Exon End		Flanking Exon Start		Flanking Exon Start
RI Exon start		SE Exon start		X 1st Exon Start		Long Exon Start		Long Exon Start
RI Exon End		SE Exon End		X 1st Exon End		Long Exon End		Long Exon End
Downstream Exon Start		Downstream Exon Start		X 2nd Exon Start		Short Exon Start		Short Exon Start
IJC Sum 1		IJC Sum 1		X 2nd Exon End		Short Exon End		Short Exon End
IJC Sum 2		IJC Sum 2		Downstream Exon Start		Flanking Exon End		Flanking Exon End
SJC Sum 1		SJC Sum 1		IJC Sum 1		IJC Sum 1		IJC Sum 1
SJC Sum 2		SJC Sum 2		IJC Sum 2		IJC Sum 2		IJC Sum 2
Mean Counts 1		Mean Counts 1		SJC Sum 1		SJC Sum 1		SJC Sum 1
Mean Counts 2		Mean Counts 2		SJC Sum 2		SJC Sum 2		SJC Sum 2
IncLevel1		IncLevel1		Mean Counts 1		Mean Counts 1		Mean Counts 1
IncLevel2		IncLevel2		Mean Counts 2		Mean Counts 2		Mean Counts 2
Mean Inclusion1		Mean Inclusion1		IncLevel1		IncLevel1		IncLevel1
Mean Inclusion2		Mean Inclusion2		IncLevel2		IncLevel2		IncLevel2
IncLevelDifference		IncLevelDifference		Mean Inclusion1		Mean Inclusion1		Mean Inclusion1
PValue		PValue		Mean Inclusion2		Mean Inclusion2		Mean Inclusion2
FDR		FDR		IncLevelDifference		IncLevelDifference		IncLevelDifference
Event		Event		PValue		PValue		PValue
				FDR		FDR		FDR
				Event		Event		Event

## Sheet: WT_DKO_RI
Gene Identifier	Transcript Identifier	Strand	Chr	Upstream Exon End	RI Exon start	RI Exon End	Downstream Exon Start	IJC Sum 1	IJC Sum 2	SJC Sum 1	SJC Sum 2	Mean Counts 1	Mean Counts 2	IncLevel1	IncLevel2	Mean Inclusion1	Mean Inclusion2	IncLevelDifference	PValue	FDR	Event
Nek8	ENSMUSG00000017405	-	chr11	78170794	78170612	78171298	78170872	5	1	0	6	1.66667	3.5	1.0,1.0,1.0	0.089,0.0	1	0.0445	0.956	1.00386e-12	2.52974e-09	RI
Ankrd54	ENSMUSG00000033055	-	chr15	79054603	79054495	79055416	79055291	13	13	0	6	4.33333	9.5	1.0,1.0,1.0	0.282,0.109	1	0.1955	0.804	6.10401e-12	7.69105e-09	RI
BC017158	ENSMUSG00000030780	-	chr7	128274703	128274632	128276143	128276085	45	63	9	0	18	31.5	0.143,0.236,0.265	1.0,1.0	0.214667	1	-0.785	2.02012e-10	1.6969e-07	RI
3110082I17Rik	ENSMUSG00000053553	-	chr5	139360730	139359738	139361388	139361306	10	8	13	0	7.66667	4	0.187,0.076,0.028	1.0,1.0	0.097	1	-0.903	3.17992e-10	2.00335e-07	RI
Glyr1	ENSMUSG00000022536	-	chr16	5048786	5048749	5049857	5049805	69	80	8	0	25.6667	40	0.268,0.641,0.316	1.0,1.0	0.408333	1	-0.592	7.07882e-09	3.56773e-06	RI
Rpl3	ENSMUSG00000060036	-	chr15	80079850	80079689	80080552	80080365	800	534	1287	1630	695.667	1082	0.071,0.058,0.097	0.04,0.039	0.0753333	0.0395	0.036	1.16742e-08	4.90315e-06	RI
Gadd45g	ENSMUSG00000021453	+	chr13	51847453	51847351	51847769	51847555	6	8	0	7	2	7.5	1.0,1.0,1.0	0.22,0.629	1	0.4245	0.576	1.86811e-08	6.72518e-06	RI
Ints6l	ENSMUSG00000035967	+	chrX	56493133	56493038	56496734	56496515	89	54	0	4	29.6667	29	1.0,1.0,1.0	0.258,0.193	1	0.2255	0.774	3.77845e-08	1.19021e-05	RI
Dusp22	ENSMUSG00000069255	+	chr13	30708749	30708676	30711231	30710705	43	28	0	4	14.3333	16	1.0,1.0,1.0	0.173,0.289	1	0.231	0.769	5.031e-08	1.40868e-05	RI
Gas5	ENSMUSG00000053332	+	chr1	161037315	161037287	161037547	161037504	225	73	318	276	181	174.5	0.154,0.156,0.188	0.054,0.099	0.166	0.0765	0.09	5.86378e-08	1.47767e-05	RI
Gm2694	ENSMUSG00000097248	+	chr8	87524427	87524295	87525552	87525414	22	16	6	0	9.33333	8	0.175,0.206,0.22	1.0,1.0	0.200333	1	-0.8	1.86873e-07	4.28109e-05	RI
Rnf123	ENSMUSG00000041528	-	chr9	108069286	108069171	108069801	108069675	7	4	0	3	2.33333	3.5	1.0,1.0,1.0	0.195,0.139	1	0.167	0.833	2.18124e-07	4.58061e-05	RI
Odf2l	ENSMUSG00000028256	+	chr3	145126225	145126092	145127890	145127830	34	38	0	4	11.3333	21	1.0,1.0,1.0	0.287,0.329	1	0.308	0.692	2.95147e-07	5.31265e-05	RI
Uggt2	ENSMUSG00000042104	-	chr14	118995072	118994945	118998213	118998096	43	22	4	0	15.6667	11	0.154,0.266,0.239	1.0,1.0	0.219667	1	-0.78	2.89917e-07	5.31265e-05	RI
Sema3e	ENSMUSG00000063531	+	chr5	14225695	14225552	14226530	14226415	11	5	4	0	5	2.5	0.0,0.221,1.0	1.0,1.0	0.407	1	-0.593	7e-07	0.0001176	RI
Zfp653	ENSMUSG00000038895	-	chr9	22056092	22055992	22056528	22056413	14	3	1	6	5	4.5	0.362,1.0,1.0	0.087,0.087	0.787333	0.087	0.7	7.99064e-07	0.000125853	RI
Adamts10	ENSMUSG00000024299	+	chr17	33549609	33549479	33550670	33550465	20	26	0	4	6.66667	15	1.0,1.0,1.0	0.392,0.326	1	0.359	0.641	9.81029e-07	0.000145423	RI
Myof	ENSMUSG00000048612	-	chr19	37981908	37981877	37983010	37982959	11	15	4	0	5	7.5	0.143,1.0,0.091	1.0,1.0	0.411333	1	-0.589	1.06075e-06	0.000148504	RI
Adck5	ENSMUSG00000022550	+	chr15	76594051	76593937	76594447	76594152	1	5	9	1	3.33333	3	0.0,0.0,0.079	1.0,0.63	0.0263333	0.815	-0.789	1.40183e-06	0.000185927	RI
Rnpepl1	ENSMUSG00000026269	+	chr1	92916946	92916710	92917746	92917146	1	11	8	3	3	7	0.0,0.0,0.214	0.686,0.29	0.0713333	0.488	-0.417	8.63689e-06	0.00108825	RI
Sik2	ENSMUSG00000037112	-	chr9	50894081	50892800	50895961	50895343	50	38	5	0	18.3333	19	0.252,0.219,1.0	1.0,1.0	0.490333	1	-0.51	1.16017e-05	0.0013922	RI
Nphs1	ENSMUSG00000006649	+	chr7	30481666	30481641	30481816	30481740	6	8	1	11	2.33333	9.5	0.602,1.0,1.0	0.251,0.335	0.867333	0.293	0.574	1.7067e-05	0.00195495	RI
Cep162	ENSMUSG00000056919	-	chr9	87238384	87238353	87239933	87239814	41	17	1	5	14	11	1.0,0.333,1.0	0.117,0.183	0.777667	0.15	0.628	1.8657e-05	0.00204415	RI
Chtop	ENSMUSG00000001017	-	chr3	90506261	90506107	90507626	90507544	382	122	36	39	139.333	80.5	0.453,0.412,0.289	0.155,0.133	0.384667	0.144	0.241	2.01934e-05	0.00212031	RI
Pgghg	ENSMUSG00000062031	+	chr7	140945082	140944950	140945349	140945237	9	9	1	6	3.33333	7.5	1.0,1.0,0.495	0.363,0.246	0.831667	0.3045	0.527	3.36701e-05	0.00339395	RI
Cpsf4	ENSMUSG00000029625	+	chr5	145177302	145177229	145178928	145178832	157	153	1	6	52.6667	79.5	0.592,1.0,1.0	0.589,0.487	0.864	0.538	0.326	4.34483e-05	0.00393233	RI
Mmp11	ENSMUSG00000000901	-	chr10	75923490	75923221	75924115	75923958	59	75	0	5	19.6667	40	1.0,1.0,1.0	0.648,0.707	1	0.6775	0.323	4.12641e-05	0.00393233	RI
Chmp2a	ENSMUSG00000033916	-	chr7	13032565	13032434	13032821	13032641	30	9	62	91	30.6667	50	0.151,0.199,0.213	0.056,0.03	0.187667	0.043	0.145	4.36926e-05	0.00393233	RI
AU022751	ENSMUSG00000073294	-	chrX	6082775	6081218	6083419	6083138	8	1	0	2	2.66667	1.5	1.0,1.0,1.0	0.0,1.0	1	0.5	0.5	5.07138e-05	0.00440685	RI
Dlst	ENSMUSG00000004789	+	chr12	85118414	85118358	85118601	85118526	14	1	16	18	10	9.5	0.348,0.348,0.103	0.0,0.039	0.266333	0.0195	0.247	6.04908e-05	0.00491731	RI
Gas5	ENSMUSG00000053332	+	chr1	161037547	161037504	161038037	161037994	734	391	285	269	339.667	330	0.29,0.243,0.286	0.157,0.199	0.273	0.178	0.095	5.87243e-05	0.00491731	RI
Gas5	ENSMUSG00000053332	+	chr1	161036852	161036819	161037315	161037287	1020	505	329	303	449.667	404	0.262,0.288,0.382	0.191,0.205	0.310667	0.198	0.113	7.92355e-05	0.0062398	RI
Arhgap27	ENSMUSG00000034255	-	chr11	103338755	103338687	103339108	103339024	5	1	1	5	2	3	0.179,1.0,1.0	0.068,0.0	0.726333	0.034	0.692	8.2439e-05	0.00629534	RI
Fdx2	ENSMUSG00000079677	-	chr9	21073181	21073074	21073318	21073263	1	6	11	5	4	5.5	0.0,0.0,0.074	0.417,0.323	0.0246667	0.37	-0.345	8.68571e-05	0.00643764	RI
Ssr4	ENSMUSG00000002014	+	chrX	73789874	73789799	73790424	73790358	44	34	5	0	16.3333	17	0.518,0.56,0.547	1.0,1.0	0.541667	1	-0.458	0.000109768	0.00790332	RI
Rad9a	ENSMUSG00000024824	-	chr19	4197403	4197338	4197586	4197476	9	6	2	13	3.66667	9.5	1.0,0.336,1.0	0.202,0.178	0.778667	0.19	0.589	0.000147978	0.00934667	RI
Fance	ENSMUSG00000007570	+	chr17	28318156	28318061	28318407	28318328	1	8	7	7	2.66667	7.5	0.092,0.0,0.0	0.288,0.233	0.0306667	0.2605	-0.23	0.000133719	0.00934667	RI
Polr3gl	ENSMUSG00000028104	-	chr3	96579911	96579797	96580089	96580015	14	8	2	4	5.33333	6	0.677,1.0,0.746	0.677,0.295	0.807667	0.486	0.322	0.000143143	0.00934667	RI
Syf2	ENSMUSG00000028821	+	chr4	134935049	134934931	134935464	134935373	13	1	6	17	6.33333	9	0.131,0.53,1.0	0.0,0.02	0.553667	0.01	0.544	0.00014836	0.00934667	RI
Slc25a22	ENSMUSG00000019082	-	chr7	141432139	141432020	141432753	141432662	18	9	1	2	6.33333	5.5	0.334,1.0,1.0	0.385,0.334	0.778	0.3595	0.418	0.00013846	0.00934667	RI
Mapk11	ENSMUSG00000053137	-	chr15	89145175	89145095	89145446	89145374	6	6	1	4	2.33333	5	0.354,1.0,1.0	0.267,0.354	0.784667	0.3105	0.474	0.000166084	0.00992577	RI
Smurf1	ENSMUSG00000038780	-	chr5	144880700	144880624	144881819	144881617	23	16	1	2	8	9	1.0,0.454,1.0	0.346,0.405	0.818	0.3755	0.442	0.000169368	0.00992577	RI
Fxyd5	ENSMUSG00000009687	-	chr7	31033018	31032729	31035283	31035208	2	3	1	1	1	2	0.0,1.0,1.0	0.062,1.0	0.666667	0.531	0.136	0.000163124	0.00992577	RI
Snx5	ENSMUSG00000027423	-	chr2	144257195	144257099	144257993	144257869	286	146	203	194	163	170	0.15,0.104,0.133	0.064,0.081	0.129	0.0725	0.056	0.000219719	0.0120368	RI
Slc22a17	ENSMUSG00000022199	-	chr14	54907630	54907518	54908366	54907885	15	1	6	8	7	4.5	0.146,0.476,1.0	0.054,0.0	0.540667	0.027	0.514	0.00021944	0.0120368	RI
Ifi35	ENSMUSG00000010358	+	chr11	101457337	101457189	101457522	101457415	6	3	1	6	2.33333	4.5	0.0,1.0,1.0	0.227,0.0	0.666667	0.1135	0.553	0.000219325	0.0120368	RI
Eif4a2	ENSMUSG00000022884	+	chr16	23110153	23109984	23110343	23110233	108	65	293	366	133.667	215.5	0.188,0.132,0.147	0.074,0.09	0.155667	0.082	0.074	0.00022852	0.0122481	RI
Thbs3	ENSMUSG00000028047	+	chr3	89224625	89224576	89225006	89224809	2	9	9	2	3.66667	5.5	0.367,0.0,0.0	1.0,0.303	0.122333	0.6515	-0.529	0.000233297	0.0122481	RI
Tcirg1	ENSMUSG00000001750	-	chr19	3902035	3901890	3902556	3902343	8	7	1	6	3	6.5	1.0,1.0,0.164	0.281,0.128	0.721333	0.2045	0.517	0.000248611	0.0123893	RI
Brat1	ENSMUSG00000000148	+	chr5	140710292	140710137	140711653	140711505	26	32	1	3	9	17.5	1.0,0.368,1.0	0.318,0.482	0.789333	0.4	0.389	0.000255652	0.0123893	RI
Ankzf1	ENSMUSG00000026199	+	chr1	75198124	75197643	75198376	75198264	11	6	2	9	4.33333	7.5	1.0,0.511,0.583	0.13,0.344	0.698	0.237	0.461	0.000255161	0.0123893	RI
Sbno2	ENSMUSG00000035673	-	chr10	80066936	80066830	80067394	80067276	6	4	1	12	2.33333	8	0.153,1.0,1.0	0.194,0.0	0.717667	0.097	0.621	0.000246871	0.0123893	RI
Anks3	ENSMUSG00000022515	-	chr16	4947758	4947648	4948363	4948225	17	27	1	4	6	15.5	0.409,1.0,1.0	0.724,0.27	0.803	0.497	0.306	0.000262623	0.012487	RI
Msln	ENSMUSG00000063011	-	chr17	25753062	25752941	25753424	25753377	7	3	1	2	2.66667	2.5	0.161,1.0,1.0	0.278,0.161	0.720333	0.2195	0.501	0.000315183	0.0140388	RI
Commd4	ENSMUSG00000032299	-	chr9	57155982	57155901	57156555	57156171	1	9	8	12	3	10.5	0.087,0.0,0.0	0.176,0.176	0.029	0.176	-0.147	0.000318509	0.0140388	RI
Nr1h2	ENSMUSG00000060601	-	chr7	44552343	44551954	44552620	44552506	4	11	1	4	1.66667	7.5	1.0,0.387,1.0	0.321,0.558	0.795667	0.4395	0.356	0.000334088	0.0140388	RI
5031439G07Rik	ENSMUSG00000036046	-	chr15	84950774	84950611	84953321	84953129	8	35	11	9	6.33333	22	0.01,0.049,0.012	0.105,0.11	0.0236667	0.1075	-0.084	0.000334257	0.0140388	RI
Hdac6	ENSMUSG00000031161	-	chrX	7939532	7939442	7939665	7939605	2	10	13	14	5	12	0.169,0.0,0.0	0.275,0.253	0.0563333	0.264	-0.208	0.000319523	0.0140388	RI
Zranb2	ENSMUSG00000028180	+	chr3	157541869	157541699	157543244	157543157	292	142	51	58	114.333	100	0.197,0.247,0.267	0.103,0.138	0.237	0.1205	0.117	0.000328925	0.0140388	RI
Man2c1	ENSMUSG00000032295	+	chr9	57137374	57137281	57137585	57137468	4	5	7	1	3.66667	3	0.307,0.182,0.129	0.571,1.0	0.206	0.7855	-0.58	0.000331334	0.0140388	RI
Tubgcp5	ENSMUSG00000033790	+	chr7	55825705	55825579	55826321	55826232	22	3	3	8	8.33333	5.5	1.0,0.333,0.466	0.024,0.077	0.599667	0.0505	0.549	0.000364729	0.0150675	RI
Tia1	ENSMUSG00000071337	+	chr6	86418932	86418877	86420411	86420323	118	60	1	3	39.6667	31.5	1.0,1.0,0.687	0.486,0.541	0.895667	0.5135	0.382	0.000393696	0.0155856	RI
Gas5	ENSMUSG00000053332	+	chr1	161036014	161035982	161036244	161036207	575	407	196	255	257	331	0.396,0.43,0.532	0.341,0.27	0.452667	0.3055	0.147	0.000398288	0.0155856	RI
Gas5	ENSMUSG00000053332	+	chr1	161036852	161036819	161037164	161037123	810	386	60	73	290	229.5	0.603,0.79,0.794	0.533,0.536	0.729	0.5345	0.195	0.000386111	0.0155856	RI
Phc1	ENSMUSG00000040669	-	chr6	122322083	122321871	122322472	122322324	144	94	103	142	82.3333	118	0.302,0.234,0.219	0.118,0.165	0.251667	0.1415	0.11	0.000402011	0.0155856	RI
Dtx2	ENSMUSG00000004947	+	chr5	136026607	136026469	136028572	136028498	30	31	0	2	10	16.5	1.0,1.0,1.0	0.364,0.379	1	0.3715	0.629	0.000420202	0.0158046	RI
Jak3	ENSMUSG00000031805	+	chr8	71679844	71679558	71680557	71680434	17	14	0	3	5.66667	8.5	1.0,1.0,1.0	0.283,0.441	1	0.362	0.638	0.000420052	0.0158046	RI
Zfp7	ENSMUSG00000033669	+	chr15	76888347	76888230	76892395	76890006	184	173	2	7	62	90	1.0,0.759,0.692	0.497,0.561	0.817	0.529	0.288	0.000475679	0.0175694	RI
Mfsd10	ENSMUSG00000001082	-	chr5	34634699	34634590	34634962	34634850	16	14	9	1	8.33333	7.5	0.249,0.726,0.249	1.0,0.785	0.408	0.8925	-0.485	0.000486529	0.0175694	RI
Chst10	ENSMUSG00000026080	-	chr1	38866035	38863866	38868086	38867980	8	4	1	1	3	2.5	0.0,1.0,1.0	0.036,1.0	0.666667	0.518	0.149	0.000500854	0.0175694	RI
Tspan7	ENSMUSG00000058254	+	chrX	10590219	10590135	10595354	10595278	27	19	1	3	9.33333	11	1.0,1.0,0.105	0.06,1.0	0.701667	0.53	0.172	0.000522899	0.0175694	RI
Snx5	ENSMUSG00000027423	-	chr2	144254812	144254725	144254942	144254902	30	8	179	174	69.6667	91	0.058,0.116,0.051	0.024,0.014	0.075	0.019	0.056	0.000519932	0.0175694	RI
Pus3	ENSMUSG00000032103	+	chr9	35565197	35564783	35565855	35565289	17	14	8	1	8.33333	7.5	0.386,0.611,0.574	1.0,0.802	0.523667	0.901	-0.377	0.000520388	0.0175694	RI
Srrt	ENSMUSG00000037364	-	chr5	137301647	137301317	137302314	137302125	118	102	2	7	40	54.5	1.0,1.0,0.761	0.74,0.569	0.920333	0.6545	0.266	0.000501353	0.0175694	RI
Rabep2	ENSMUSG00000030727	+	chr7	126444578	126444522	126444936	126444819	7	10	1	3	2.66667	6.5	0.192,1.0,1.0	0.454,0.416	0.730667	0.435	0.296	0.000517327	0.0175694	RI
Rundc3a	ENSMUSG00000006575	+	chr11	102399284	102399194	102399463	102399382	0	5	6	5	2	5	0.0,0.0,0.0	0.245,0.464	0	0.3545	-0.355	0.000571345	0.0186127	RI
Slc22a17	ENSMUSG00000022199	-	chr14	54908103	54907885	54908366	54908260	2	4	3	1	1.66667	2.5	1.0,0.244,0.0	1.0,0.492	0.414667	0.746	-0.331	0.000576109	0.0186127	RI
Catsperg1	ENSMUSG00000049676	-	chr7	29190027	29189946	29190789	29190212	4	4	0	2	1.33333	3	1.0,1.0,1.0	0.366,0.366	1	0.366	0.634	0.000562831	0.0186127	RI
Plaur	ENSMUSG00000046223	+	chr7	24472054	24471898	24472707	24472572	9	5	0	2	3	3.5	1.0,1.0,1.0	0.0,1.0	1	0.5	0.5	0.000608211	0.0194012	RI
Adck5	ENSMUSG00000022550	+	chr15	76595266	76595013	76595453	76595336	6	0	6	6	4	3	0.147,0.508,0.437	0.0,0.0	0.364	0	0.364	0.000618379	0.0194789	RI
Ptov1	ENSMUSG00000038502	-	chr7	44864835	44864761	44865002	44864912	20	3	58	48	26	25.5	0.217,0.11,0.121	0.019,0.041	0.149333	0.03	0.119	0.000632557	0.0195959	RI
Pck2	ENSMUSG00000040618	+	chr14	55545047	55544394	55545425	55545206	4	6	3	0	2.33333	3	1.0,0.138,0.0	1.0,1.0	0.379333	1	-0.621	0.000637645	0.0195959	RI
Cfap410	ENSMUSG00000020284	+	chr10	77979771	77979752	77980547	77980500	9	7	3	0	4	3.5	0.189,0.157,1.0	1.0,1.0	0.448667	1	-0.551	0.00069171	0.0210013	RI
Med12	ENSMUSG00000079487	+	chrX	101294012	101293957	101294175	101294087	13	24	2	11	5	17.5	0.667,0.778,1.0	0.5,0.556	0.815	0.528	0.287	0.000814453	0.0244336	RI
Coro7	ENSMUSG00000039637	-	chr16	4634681	4634588	4634907	4634761	2	5	5	2	2.33333	3.5	0.0,0.195,0.195	1.0,0.326	0.13	0.663	-0.533	0.000888055	0.0263282	RI
Gm128	ENSMUSG00000068860	-	chr3	95240111	95239949	95241598	95240594	14	15	0	3	4.66667	9	1.0,1.0,1.0	0.485,0.35	1	0.4175	0.583	0.000963706	0.0282388	RI
Neu1	ENSMUSG00000007038	+	chr17	34932828	34932565	34934185	34934002	71	61	2	8	24.3333	34.5	0.474,0.59,1.0	0.419,0.231	0.688	0.325	0.363	0.000980081	0.0283886	RI
Jtb	ENSMUSG00000027937	+	chr3	90232232	90232194	90232511	90232428	23	15	2	6	8.33333	10.5	1.0,0.492,1.0	0.333,0.624	0.830667	0.4785	0.352	0.00106946	0.0306254	RI
Gmppb	ENSMUSG00000070284	+	chr9	108050976	108050848	108051242	108051059	4	4	6	1	3.33333	2.5	0.322,0.487,0.0	1.0,0.587	0.269667	0.7935	-0.524	0.00112516	0.0318586	RI
Camkk1	ENSMUSG00000020785	+	chr11	73037268	73037194	73037625	73037537	4	6	1	4	1.66667	5	1.0,0.304,1.0	0.098,0.353	0.768	0.2255	0.543	0.00114038	0.0319306	RI
Golga2	ENSMUSG00000002546	+	chr2	32299125	32299031	32299310	32299203	1	5	15	4	5.33333	4.5	0.109,0.0,0.0	0.662,0.14	0.0363333	0.401	-0.365	0.00118899	0.032926	RI
Ncapg	ENSMUSG00000015880	+	chr5	45691826	45691601	45693338	45693156	130	48	25	29	51.6667	38.5	0.363,0.159,0.223	0.093,0.071	0.248333	0.082	0.166	0.00126275	0.0345883	RI
Ndst2	ENSMUSG00000039308	-	chr14	20724563	20724460	20724820	20724710	3	4	4	1	2.33333	2.5	0.145,0.145,1.0	0.503,1.0	0.43	0.7515	-0.322	0.00131808	0.0357156	RI
H2-K1	ENSMUSG00000061232	-	chr17	33996859	33996826	33997157	33997037	2	7	6	5	2.66667	6	0.165,0.0,0.0	0.426,0.165	0.055	0.2955	-0.24	0.00136113	0.0363321	RI
Kif2c	ENSMUSG00000028678	-	chr4	117177969	117177920	117178246	117178144	13	3	43	62	18.6667	32.5	0.111,0.083,0.052	0.015,0.013	0.082	0.014	0.068	0.00136966	0.0363321	RI
Kcnq2	ENSMUSG00000016346	-	chr2	181109785	181108443	181112125	181111999	24	28	1	3	8.33333	15.5	0.228,1.0,1.0	0.228,0.247	0.742667	0.2375	0.505	0.00140344	0.0368404	RI
Rpl10a	ENSMUSG00000037805	+	chr17	28329047	28328966	28329522	28329373	215	125	231	232	148.667	178.5	0.131,0.136,0.188	0.073,0.115	0.151667	0.094	0.058	0.00149279	0.0376735	RI
Arfrp1	ENSMUSG00000038671	-	chr2	181361071	181361000	181361472	181361390	26	20	2	5	9.33333	12.5	0.604,1.0,0.712	0.533,0.337	0.772	0.435	0.337	0.00152488	0.0376735	RI
Ubxn11	ENSMUSG00000012126	+	chr4	134123919	134123841	134124954	134124833	16	26	0	4	5.33333	15	1.0,1.0,1.0	0.221,1.0	1	0.6105	0.389	0.00150357	0.0376735	RI
Dennd6b	ENSMUSG00000015377	-	chr15	89185464	89185361	89185647	89185537	3	3	4	1	2.33333	2	0.202,0.503,0.0	0.503,1.0	0.235	0.7515	-0.517	0.00147314	0.0376735	RI
Tmem191c	ENSMUSG00000055692	+	chr16	17277401	17277341	17277592	17277527	2	11	5	8	2.33333	9.5	0.0,0.272,0.0	0.296,1.0	0.0906667	0.648	-0.557	0.00151963	0.0376735	RI
Ankrd54	ENSMUSG00000033055	-	chr15	79055416	79055291	79055542	79055494	1	5	11	8	4	6.5	0.14,0.0,0.0	0.164,0.329	0.0466667	0.2465	-0.2	0.00150324	0.0376735	RI
Larp7	ENSMUSG00000027968	-	chr3	127546403	127546046	127546569	127546475	22	4	69	56	30.3333	30	0.277,0.11,0.099	0.047,0.02	0.162	0.0335	0.129	0.00156978	0.0380371	RI
Rnf167	ENSMUSG00000040746	+	chr11	70650017	70649674	70650219	70650125	21	6	29	40	16.6667	23	0.345,0.197,0.149	0.062,0.044	0.230333	0.053	0.177	0.00156823	0.0380371	RI
Tank	ENSMUSG00000064289	+	chr2	61643785	61643714	61644422	61644306	8	9	3	0	3.66667	4.5	0.201,1.0,0.159	1.0,1.0	0.453333	1	-0.547	0.00161838	0.0388412	RI
Unc13b	ENSMUSG00000028456	+	chr4	43257935	43257846	43258302	43258149	2	5	2	1	1.33333	3	1.0,0.206,0.0	1.0,0.206	0.402	0.603	-0.201	0.00173051	0.0411405	RI
Dpp7	ENSMUSG00000026958	-	chr2	25355028	25354892	25355721	25355557	29	25	2	8	10.3333	16.5	1.0,0.332,1.0	0.303,0.199	0.777333	0.251	0.526	0.00183804	0.0432885	RI
Tmem198b	ENSMUSG00000047090	-	chr10	128801511	128801350	128802517	128801935	8	13	4	1	4	7	1.0,0.131,0.231	1.0,0.513	0.454	0.7565	-0.302	0.00196661	0.0458876	RI
Brd9	ENSMUSG00000057649	+	chr13	73942054	73941943	73942806	73942630	25	23	0	4	8.33333	13.5	1.0,1.0,1.0	0.224,1.0	1	0.612	0.388	0.00198762	0.0459523	RI
Fhod1	ENSMUSG00000014778	-	chr8	105331824	105331641	105332192	105332036	23	11	1	11	8	11	1.0,1.0,0.511	0.16,1.0	0.837	0.58	0.257	0.00206011	0.0463525	RI
Dab2ip	ENSMUSG00000026883	+	chr2	35728128	35728057	35730994	35729110	138	111	2	5	46.6667	58	1.0,0.665,1.0	0.687,0.537	0.888333	0.612	0.276	0.00204876	0.0463525	RI
Llgl1	ENSMUSG00000020536	+	chr11	60713041	60712920	60714186	60713128	26	20	3	10	9.66667	15	0.735,0.676,1.0	0.481,0.481	0.803667	0.481	0.323	0.00205904	0.0463525	RI
Pkn3	ENSMUSG00000026785	+	chr2	30080071	30079925	30080686	30080574	26	29	1	3	9	16	1.0,0.539,1.0	0.493,0.645	0.846333	0.569	0.277	0.00208799	0.046564	RI
Nolc1	ENSMUSG00000015176	+	chr19	46078758	46078702	46079021	46078872	3	8	23	12	8.66667	10	0.0,0.166,0.0	0.102,0.323	0.0553333	0.2125	-0.157	0.00213812	0.0472638	RI
Chkb	ENSMUSG00000022617	-	chr15	89428544	89428410	89428827	89428713	14	13	4	1	6	7	0.551,0.48,0.551	0.648,1.0	0.527333	0.824	-0.297	0.00224661	0.04923	RI
Ipo7	ENSMUSG00000066232	+	chr7	110049070	110048944	110049693	110049595	63	23	160	135	74.3333	79	0.035,0.037,0.063	0.024,0.016	0.045	0.02	0.025	0.00227156	0.0493478	RI

## Sheet: WT_DKO_SE
Gene Identifier	Transcript Identifier	Strand	Chr	Upstream Exon End	SE Exon start	SE Exon End	Downstream Exon Start	IJC Sum 1	IJC Sum 2	SJC Sum 1	SJC Sum 2	Mean Counts 1	Mean Counts 2	IncLevel1	IncLevel2	Mean Inclusion1	Mean Inclusion2	IncLevelDifference	PValue	FDR	Event
Rims2	ENSMUSG00000037386	+	chr15	39585762	39586533	39586785	39616268	6	7	10	0	5.33333	3.5	0.147,0.044,0.314	1.0,1.0	0.168333	1	-0.832	4.93716e-13	4.98431e-09	SE
Exd2	ENSMUSG00000032705	+	chr12	80484372	80488284	80488507	80489401	3	2	0	7	1	4.5	1.0,1.0,1.0	0.048,0.112	1	0.08	0.92	9.86211e-13	4.98431e-09	SE
Synj2	ENSMUSG00000023805	+	chr17	6028586	6029699	6029834	6032696	0	6	7	0	2.33333	3	0.0,0.0,0.0	1.0,1.0	0	1	-1	1.8675e-11	5.6761e-08	SE
Fndc3c1	ENSMUSG00000033737	-	chrX	106473181	106473830	106473913	106484944	13	0	1	2	4.66667	1	0.587,1.0,1.0	0.0,0.0	0.862333	0	0.862	2.24618e-11	5.6761e-08	SE
Scube3	ENSMUSG00000038677	+	chr17	28165642	28165986	28166148	28166356	1	7	4	0	1.66667	3.5	0.0,0.137,0.0	1.0,1.0	0.0456667	1	-0.954	8.40894e-11	1.21425e-07	SE
Epb41l2	ENSMUSG00000019978	+	chr10	25495591	25501577	25501631	25501823	1	4	5	0	2	2	0.225,0.0,0.0	1.0,1.0	0.075	1	-0.925	6.25644e-11	1.21425e-07	SE
Synj2	ENSMUSG00000023805	+	chr17	6028586	6029683	6029834	6032696	0	5	7	0	2.33333	2.5	0.0,0.0,0.0	1.0,1.0	0	1	-1	7.30481e-11	1.21425e-07	SE
Aida	ENSMUSG00000042901	+	chr1	183297628	183298273	183298445	183304677	0	6	3	0	1	3	0.0,0.0,0.0	1.0,1.0	0	1	-1	1.03287e-10	1.30503e-07	SE
Thoc2l	ENSMUSG00000097392	+	chr5	104541262	104549585	104549690	104550885	4	9	7	0	3.66667	4.5	0.0,0.455,0.455	1.0,1.0	0.303333	1	-0.697	1.02061e-09	1.14626e-06	SE
Cdc14b	ENSMUSG00000033102	-	chr13	64196675	64196979	64197045	64201331	3	3	6	0	3	1.5	0.0,0.285,0.0	1.0,1.0	0.095	1	-0.905	1.43487e-09	1.45037e-06	SE
Marchf8	ENSMUSG00000025702	+	chr6	116401122	116401336	116402182	116403419	26	24	6	0	10.6667	12	0.14,0.394,0.275	1.0,1.0	0.269667	1	-0.73	2.98282e-09	2.74094e-06	SE
Pik3c2a	ENSMUSG00000030660	-	chr7	116418581	116442590	116442678	116443303	4	6	6	0	3.33333	3	0.103,0.479,0.315	1.0,1.0	0.299	1	-0.701	8.937e-09	7.52793e-06	SE
Ndufv3	ENSMUSG00000024038	+	chr17	31521692	31527309	31528401	31531109	158	375	88	66	82	220.5	0.079,0.097,0.149	0.258,0.279	0.108333	0.2685	-0.16	1.49188e-08	1.07714e-05	SE
Ddhd1	ENSMUSG00000037697	-	chr14	45620840	45622840	45622942	45629579	5	5	6	0	3.66667	2.5	0.175,0.124,0.56	1.0,1.0	0.286333	1	-0.714	1.39498e-08	1.07714e-05	SE
Gtf2a2	ENSMUSG00000033543	+	chr9	70012661	70014292	70014491	70015291	12	0	2	4	4.66667	2	0.622,1.0,0.451	0.0,0.0	0.691	0	0.691	6.03023e-08	4.06357e-05	SE
Prrc2b	ENSMUSG00000039262	+	chr2	32212291	32212886	32214947	32216045	258	574	49	27	102.333	300.5	0.161,0.108,0.226	0.397,0.462	0.165	0.4295	-0.264	1.06203e-07	6.70937e-05	SE
Tnrc18	ENSMUSG00000039477	-	chr5	142790189	142793004	142793160	142815014	6	4	5	0	3.66667	2	1.0,0.0,0.0	1.0,1.0	0.333333	1	-0.667	1.17329e-07	6.97623e-05	SE
Taz	ENSMUSG00000009995	+	chrX	74288513	74288928	74289019	74289104	6	1	1	3	2.33333	2	1.0,0.475,1.0	0.184,0.0	0.825	0.092	0.733	1.46617e-07	8.23339e-05	SE
Mccc2	ENSMUSG00000021646	-	chr13	100000316	100002286	100002439	100015385	2	3	4	0	2	1.5	1.0,0.0,0.141	1.0,1.0	0.380333	1	-0.62	1.90991e-07	9.78112e-05	SE
Bin1	ENSMUSG00000024381	+	chr18	32414290	32414944	32415037	32419842	6	0	1	4	2.33333	2	0.309,1.0,1.0	0.0,0.0	0.769667	0	0.77	2.00583e-07	9.78112e-05	SE
Icmt	ENSMUSG00000039662	+	chr4	152298773	152299136	152299245	152299670	2	4	7	0	3	2	1.0,0.29,0.0	1.0,1.0	0.43	1	-0.57	2.03209e-07	9.78112e-05	SE
Zfp839	ENSMUSG00000021271	+	chr12	110855872	110860795	110861023	110863963	13	23	0	6	4.33333	14.5	1.0,1.0,1.0	0.464,0.527	1	0.4955	0.504	3.76364e-07	0.000172922	SE
Ccdc57	ENSMUSG00000048445	-	chr11	120866676	120871047	120871262	120873585	5	4	0	4	1.66667	4	1.0,1.0,1.0	0.437,0.079	1	0.258	0.742	4.06903e-07	0.000178825	SE
Cipc	ENSMUSG00000034157	+	chr12	86952931	86959727	86959828	86960271	7	3	0	4	2.33333	3.5	1.0,1.0,1.0	0.176,0.299	1	0.2375	0.762	6.5534e-07	0.000276007	SE
Dgcr8	ENSMUSG00000022718	-	chr16	18284696	18285100	18285308	18289102	25	22	1	11	8.66667	16.5	0.726,1.0,1.0	0.346,0.346	0.908667	0.346	0.563	7.32879e-07	0.000286089	SE
Vcan	ENSMUSG00000021614	-	chr13	89693501	89702917	89705797	89712204	404	412	10	0	138	206	0.519,0.332,0.822	1.0,1.0	0.557667	1	-0.442	7.35883e-07	0.000286089	SE
Lifr	ENSMUSG00000054263	+	chr15	7129826	7130900	7131038	7154386	0	7	6	2	2	4.5	0.0,0.0,0.0	0.585,0.514	0	0.5495	-0.549	1.21138e-06	0.000453503	SE
Tk2	ENSMUSG00000035824	-	chr8	104231248	104236771	104236845	104238743	10	8	0	5	3.33333	6.5	1.0,1.0,1.0	0.43,0.456	1	0.443	0.557	1.72398e-06	0.000622358	SE
Suco	ENSMUSG00000040297	-	chr1	161845358	161845559	161845580	161847204	1	9	8	5	3	7	0.0,0.0,0.281	0.54,0.61	0.0936667	0.575	-0.481	2.50854e-06	0.000874356	SE
Eif4a2	ENSMUSG00000022884	+	chr16	23111896	23112350	23112457	23113166	159	134	137	306	98.6667	220	0.302,0.271,0.424	0.142,0.174	0.332333	0.158	0.174	3.41465e-06	0.00115051	SE
Rian	ENSMUSG00000097451	+	chr12	109645926	109646606	109646751	109649153	25	26	7	0	10.6667	13	0.443,0.705,0.556	1.0,1.0	0.568	1	-0.432	3.86612e-06	0.0012606	SE
Snx11	ENSMUSG00000020876	-	chr11	96774495	96775373	96775433	96776967	7	0	3	3	3.33333	1.5	1.0,0.526,0.455	0.0,0.0	0.660333	0	0.66	6.20953e-06	0.00196143	SE
Tmem234	ENSMUSG00000028797	+	chr4	129601134	129601869	129601961	129602194	3	6	4	0	2.33333	3	0.0,0.31,0.31	1.0,1.0	0.206667	1	-0.793	7.28268e-06	0.00223071	SE
Nin	ENSMUSG00000021068	-	chr12	70040880	70042131	70044252	70045146	51	124	4	0	18.3333	62	0.291,0.394,0.255	1.0,1.0	0.313333	1	-0.687	7.72578e-06	0.00229683	SE
Etl4	ENSMUSG00000036617	+	chr2	20801661	20805584	20805662	20807901	33	27	9	0	14	13.5	0.688,0.551,0.696	1.0,1.0	0.645	1	-0.355	8.05936e-06	0.00232754	SE
Rnft1	ENSMUSG00000020521	+	chr11	86484799	86484950	86485217	86486060	1	16	10	12	3.66667	14	0.068,0.0,0.0	0.163,0.369	0.0226667	0.266	-0.243	8.6718e-06	0.00243485	SE
Ttc3	ENSMUSG00000040785	+	chr16	94403368	94408553	94408716	94409683	49	31	1	6	16.6667	18.5	0.843,1.0,1.0	0.75,0.486	0.947667	0.618	0.33	9.45025e-06	0.00258171	SE
Tbp	ENSMUSG00000014767	+	chr17	15500024	15501311	15501357	15502964	10	3	1	4	3.66667	3.5	1.0,0.65,1.0	0.292,0.383	0.883333	0.3375	0.546	1.11772e-05	0.00297312	SE
Nr2c2ap	ENSMUSG00000071078	+	chr8	70132008	70132411	70132517	70132586	43	32	1	8	14.6667	20	0.876,1.0,1.0	0.509,0.779	0.958667	0.644	0.315	1.30848e-05	0.00339132	SE
Rnf130	ENSMUSG00000020376	+	chr11	50095980	50099245	50099339	50104548	12	13	1	11	4.33333	12	0.571,1.0,1.0	0.228,0.608	0.857	0.418	0.439	1.38115e-05	0.00349017	SE
Aldh3a2	ENSMUSG00000010025	-	chr11	61246321	61247928	61248041	61248861	0	7	13	7	4.33333	7	0.0,0.0,0.0	0.166,0.399	0	0.2825	-0.283	1.57511e-05	0.00388321	SE
Wnk1	ENSMUSG00000045962	-	chr6	119960724	119962396	119963632	119968475	144	237	83	53	75.6667	145	0.092,0.142,0.059	0.218,0.185	0.0976667	0.2015	-0.104	1.79447e-05	0.00431869	SE
Bptf	ENSMUSG00000040481	-	chr11	107043825	107044491	107044665	107046999	73	141	34	14	35.6667	77.5	0.27,0.465,0.438	0.783,0.71	0.391	0.7465	-0.355	1.95441e-05	0.00459423	SE
Glo1	ENSMUSG00000024026	-	chr17	30596463	30596710	30597642	30597804	69	36	1	4	23.3333	20	0.573,1.0,1.0	0.358,0.439	0.857667	0.3985	0.459	2.03691e-05	0.00467935	SE
Pkp4	ENSMUSG00000026991	+	chr2	59348041	59352261	59352335	59354202	35	32	0	6	11.6667	19	1.0,1.0,1.0	0.811,0.654	1	0.7325	0.267	2.39911e-05	0.00538894	SE
Btrc	ENSMUSG00000025217	+	chr19	45363886	45406544	45406586	45456532	5	3	1	5	2	4	0.391,1.0,1.0	0.243,0.299	0.797	0.271	0.526	2.65394e-05	0.00583174	SE
Gfm2	ENSMUSG00000021666	+	chr13	97155600	97160086	97160167	97161018	38	25	0	6	12.6667	15.5	1.0,1.0,1.0	0.49,0.878	1	0.684	0.316	2.78022e-05	0.00597924	SE
Tbp	ENSMUSG00000014767	+	chr17	15500024	15501153	15501357	15502964	11	6	1	4	4	5	1.0,0.446,1.0	0.152,0.518	0.815333	0.335	0.48	3.06628e-05	0.00645708	SE
Nrp2	ENSMUSG00000025969	+	chr1	62786301	62812533	62812584	62815332	21	23	1	8	7.33333	15.5	1.0,1.0,0.704	0.573,0.676	0.901333	0.6245	0.277	3.41692e-05	0.00704861	SE
Ubn2	ENSMUSG00000038538	+	chr6	38487150	38489253	38489304	38490383	13	1	4	5	5.66667	3	0.543,0.543,0.806	0.229,0.0	0.630667	0.1145	0.516	3.74147e-05	0.00756376	SE
Fyn	ENSMUSG00000019843	+	chr10	39395044	39455065	39455135	39511738	26	12	1	5	9	8.5	1.0,0.823,1.0	0.508,0.608	0.941	0.558	0.383	4.16928e-05	0.00826336	SE
Spata13	ENSMUSG00000021990	+	chr14	60692548	60706713	60707079	60709424	52	33	0	4	17.3333	18.5	1.0,1.0,1.0	0.576,0.591	1	0.5835	0.417	4.37238e-05	0.00849923	SE
Cep170	ENSMUSG00000057335	-	chr1	176758517	176761350	176761500	176769232	15	16	0	4	5	10	1.0,1.0,1.0	0.6,0.538	1	0.569	0.431	5.20964e-05	0.00975167	SE
Tcf7l2	ENSMUSG00000024985	+	chr19	55923944	55924529	55924580	55931433	5	4	1	5	2	4.5	1.0,0.373,1.0	0.373,0.229	0.791	0.301	0.49	5.20204e-05	0.00975167	SE
Svil	ENSMUSG00000024236	+	chr18	5049494	5055979	5056849	5058124	53	55	1	5	18	30	1.0,0.613,1.0	0.552,0.388	0.871	0.47	0.401	5.40945e-05	0.00984147	SE
Tmem39b	ENSMUSG00000053730	-	chr4	129692516	129692635	129692718	129693065	5	3	1	4	2	3.5	1.0,1.0,0.322	0.192,0.322	0.774	0.257	0.517	5.73648e-05	0.00984147	SE
Tmem234	ENSMUSG00000028797	+	chr4	129601134	129601406	129601625	129602194	10	12	4	0	4.66667	6	0.434,0.338,0.389	1.0,1.0	0.387	1	-0.613	5.50005e-05	0.00984147	SE
Sun1	ENSMUSG00000036817	+	chr5	139230838	139231126	139231237	139233470	48	45	1	7	16.3333	26	0.89,1.0,1.0	0.65,0.816	0.963333	0.733	0.23	5.55872e-05	0.00984147	SE
Dclre1b	ENSMUSG00000027845	-	chr3	103807576	103808071	103808237	103808899	12	8	1	4	4.33333	6	0.555,1.0,1.0	0.651,0.172	0.851667	0.4115	0.44	5.74443e-05	0.00984147	SE
Map4k4	ENSMUSG00000026074	+	chr1	40000749	40003756	40003987	40004806	210	143	3	12	71	77.5	0.946,1.0,0.882	0.774,0.707	0.942667	0.7405	0.202	7.01842e-05	0.011498	SE
Slbp	ENSMUSG00000004642	-	chr5	33645637	33646009	33646069	33651962	37	44	0	8	12.3333	26	1.0,1.0,1.0	0.635,1.0	1	0.8175	0.182	6.93032e-05	0.011498	SE
Slbp	ENSMUSG00000004642	-	chr5	33645637	33649742	33649847	33651962	56	79	0	8	18.6667	43.5	1.0,1.0,1.0	0.681,1.0	1	0.8405	0.159	7.0526e-05	0.011498	SE
Aire	ENSMUSG00000000731	-	chr10	78034489	78034585	78034707	78036684	6	8	1	7	2.33333	7.5	1.0,0.432,1.0	0.276,0.314	0.810667	0.295	0.516	7.38656e-05	0.0118513	SE
Mtrr	ENSMUSG00000034617	-	chr13	68572700	68575017	68575390	68577587	126	100	7	0	44.3333	50	0.626,0.801,0.864	1.0,1.0	0.763667	1	-0.236	7.51819e-05	0.011874	SE
Mis12	ENSMUSG00000040599	+	chr11	71019723	71020005	71020189	71024549	49	39	7	0	18.6667	19.5	1.0,0.647,0.566	1.0,1.0	0.737667	1	-0.262	7.80926e-05	0.012144	SE
Btrc	ENSMUSG00000025217	+	chr19	45423240	45456532	45456610	45471014	38	37	7	0	15	18.5	0.729,0.662,0.844	1.0,1.0	0.745	1	-0.255	8.04413e-05	0.0123197	SE
Rian	ENSMUSG00000097451	+	chr12	109637926	109643413	109643461	109645261	73	54	11	0	28	27	0.931,0.892,0.647	1.0,1.0	0.823333	1	-0.177	8.39184e-05	0.0124742	SE
Ppip5k2	ENSMUSG00000040648	-	chr1	97713144	97716541	97716604	97717441	2	2	3	0	1.66667	1	0.0,0.0,1.0	1.0,1.0	0.333333	1	-0.667	8.2707e-05	0.0124742	SE
Stk19	ENSMUSG00000061207	-	chr17	34824324	34824513	34824661	34824750	6	4	1	4	2.33333	4	0.402,1.0,1.0	0.252,0.252	0.800667	0.252	0.549	8.7062e-05	0.0126401	SE
Snapc4	ENSMUSG00000036281	-	chr2	26378067	26378160	26378279	26378493	0	6	4	5	1.33333	5.5	0.0,0.0,0.0	0.225,0.537	0	0.381	-0.381	8.7535e-05	0.0126401	SE
Cobl	ENSMUSG00000020173	-	chr11	12343917	12365104	12365179	12369593	16	28	1	6	5.66667	17	0.714,1.0,1.0	0.875,0.583	0.904667	0.729	0.176	9.3251e-05	0.0132758	SE
Dars2	ENSMUSG00000026709	-	chr1	161046929	161049937	161050000	161051330	32	45	1	8	11	26.5	1.0,0.83,1.0	0.743,0.759	0.943333	0.751	0.192	9.72106e-05	0.0132784	SE
Slx4ip	ENSMUSG00000027281	+	chr2	136905600	136946304	136946504	136947041	7	5	1	4	2.66667	4.5	0.353,1.0,1.0	0.083,0.522	0.784333	0.3025	0.482	9.65896e-05	0.0132784	SE
Prkcg	ENSMUSG00000078816	+	chr7	3314541	3318859	3319012	3319530	10	5	0	3	3.33333	4	1.0,1.0,1.0	0.33,0.397	1	0.3635	0.636	9.48175e-05	0.0132784	SE
Pcgf2	ENSMUSG00000018537	-	chr11	97693568	97699205	97699300	97699535	7	4	1	3	2.66667	3.5	1.0,1.0,0.306	0.398,0.306	0.768667	0.352	0.417	0.000100263	0.0135128	SE
Bptf	ENSMUSG00000040481	-	chr11	107086897	107095001	107095190	107095715	34	49	1	7	11.6667	28	0.719,1.0,1.0	0.84,0.405	0.906333	0.6225	0.284	0.000104474	0.0138951	SE
Kansl1	ENSMUSG00000018412	-	chr11	104357596	104368679	104368778	104378684	83	71	17	2	33.3333	36.5	0.623,0.721,0.683	0.903,1.0	0.675667	0.9515	-0.276	0.000114651	0.0148576	SE
Qrich1	ENSMUSG00000006673	+	chr9	108517240	108518766	108518826	108528588	16	3	43	64	19.6667	33.5	0.17,0.156,0.182	0.014,0.043	0.169333	0.0285	0.141	0.000113866	0.0148576	SE
Sorbs1	ENSMUSG00000025006	-	chr19	40365166	40369689	40369719	40373475	1	9	6	11	2.33333	10	0.0,0.417,0.0	0.417,0.263	0.139	0.34	-0.201	0.000126021	0.0161243	SE
Map4k4	ENSMUSG00000026074	+	chr1	40000749	40003762	40003987	40004806	172	129	3	12	58.3333	70.5	0.938,1.0,0.857	0.767,0.676	0.931667	0.7215	0.21	0.000130452	0.0164826	SE
Hp1bp3	ENSMUSG00000028759	+	chr4	138217294	138221525	138221718	138222088	8	6	1	2	3	4	1.0,0.528,1.0	0.456,0.456	0.842667	0.456	0.387	0.000140226	0.0172854	SE
Trit1	ENSMUSG00000028653	+	chr4	123048880	123049151	123049264	123049476	19	30	7	1	8.66667	15.5	0.499,0.499,0.615	0.905,1.0	0.537667	0.9525	-0.415	0.000139229	0.0172854	SE
Zbtb18	ENSMUSG00000063659	+	chr1	177443341	177443984	177444092	177447088	1	7	2	0	1	3.5	0.0,0.0,1.0	1.0,1.0	0.333333	1	-0.667	0.000146259	0.0178119	SE
Aire	ENSMUSG00000000731	-	chr10	78034489	78034585	78035833	78036684	118	274	1	7	39.6667	140.5	1.0,0.789,1.0	0.818,0.566	0.929667	0.692	0.238	0.000150167	0.0180701	SE
Gtf2i	ENSMUSG00000060261	-	chr5	134274595	134279436	134279514	134282786	128	93	14	1	47.3333	47	0.948,0.839,0.7	1.0,0.956	0.829	0.978	-0.149	0.000151965	0.0180713	SE
Pdgfc	ENSMUSG00000028019	+	chr3	81037554	81131017	81131076	81141404	1	7	4	8	1.66667	7.5	0.0,0.219,0.0	0.402,0.157	0.073	0.2795	-0.207	0.000162799	0.0191346	SE
Camkk2	ENSMUSG00000029471	-	chr5	122737533	122742099	122742228	122743869	13	12	1	5	4.66667	8.5	1.0,1.0,0.269	0.524,0.424	0.756333	0.474	0.282	0.00016945	0.0196874	SE
Svil	ENSMUSG00000024236	+	chr18	4920874	4971089	4971197	5037107	15	8	2	8	5.66667	8	1.0,0.787,0.621	0.12,0.551	0.802667	0.3355	0.467	0.000177653	0.0201766	SE
Zyg11a	ENSMUSG00000034645	-	chr4	108183745	108184432	108184494	108187239	16	16	1	5	5.66667	10.5	1.0,0.732,1.0	0.622,0.646	0.910667	0.634	0.277	0.000177331	0.0201766	SE
Zeb1	ENSMUSG00000024238	+	chr18	5705243	5748693	5748855	5758964	12	13	0	4	4	8.5	1.0,1.0,1.0	0.717,0.345	1	0.531	0.469	0.000202982	0.0227972	SE
Malt1	ENSMUSG00000032688	+	chr18	65449018	65449574	65449607	65451546	2	6	6	2	2.66667	4	0.41,0.0,0.41	0.776,0.41	0.273333	0.593	-0.32	0.000208004	0.0228533	SE
Epb41	ENSMUSG00000028906	-	chr4	131935867	131937014	131937464	131957642	70	76	8	1	26	38.5	0.481,0.65,0.562	1.0,0.825	0.564333	0.9125	-0.348	0.000207299	0.0228533	SE
Madd	ENSMUSG00000040687	-	chr2	91138755	91140556	91140626	91142755	2	7	3	0	1.66667	3.5	1.0,0.205,0.0	1.0,1.0	0.401667	1	-0.598	0.000210387	0.0228666	SE
Prorsd1	ENSMUSG00000032673	-	chr11	29513676	29514431	29514522	29514916	1	6	16	7	5.66667	6.5	0.101,0.0,0.0	0.404,0.213	0.0336667	0.3085	-0.275	0.00021899	0.0235484	SE
Zfp410	ENSMUSG00000042472	+	chr12	84338782	84340101	84340229	84342994	26	21	0	4	8.66667	12.5	1.0,1.0,1.0	0.689,0.624	1	0.6565	0.344	0.000232032	0.0246883	SE
Zfp219	ENSMUSG00000049295	-	chr14	52009662	52009969	52010058	52020522	31	27	1	5	10.6667	16	1.0,0.892,1.0	0.709,0.716	0.964	0.7125	0.252	0.00026226	0.0276138	SE
Dmxl1	ENSMUSG00000037416	+	chr18	49922715	49925918	49925981	49931910	1	8	16	21	5.66667	14.5	0.0,0.153,0.0	0.113,0.352	0.051	0.2325	-0.181	0.000271442	0.0282859	SE
Ttc3	ENSMUSG00000040785	+	chr16	94403368	94408746	94408901	94409683	4	5	1	6	1.66667	5.5	0.395,1.0,1.0	0.328,0.14	0.798333	0.234	0.564	0.000300452	0.030724	SE
Zfp821	ENSMUSG00000031728	+	chr8	109706419	109708028	109708144	109709410	4	5	1	3	1.66667	4	1.0,0.282,1.0	0.371,0.44	0.760667	0.4055	0.355	0.000300918	0.030724	SE
Tmem234	ENSMUSG00000028797	+	chr4	129601243	129601869	129601961	129602194	3	6	4	1	2.33333	3.5	0.0,1.0,0.473	1.0,0.642	0.491	0.821	-0.33	0.000323609	0.0327104	SE
Btrc	ENSMUSG00000025217	+	chr19	45363886	45423132	45423240	45456532	21	26	1	5	7.33333	15.5	0.711,1.0,1.0	0.727,0.64	0.903667	0.6835	0.22	0.000358442	0.0345352	SE
Mgat1	ENSMUSG00000020346	+	chr11	49245617	49251549	49251674	49260570	6	3	4	0	3.33333	1.5	0.273,0.429,0.273	1.0,1.0	0.325	1	-0.675	0.000356194	0.0345352	SE
Map4k4	ENSMUSG00000026074	+	chr1	40000749	40001429	40001591	40003756	23	37	35	14	19.3333	25.5	0.168,0.211,0.126	0.442,0.465	0.168333	0.4535	-0.285	0.000354923	0.0345352	SE
Map3k10	ENSMUSG00000040390	-	chr7	27664573	27664949	27665098	27668348	5	1	0	2	1.66667	1.5	1.0,1.0,1.0	1.0,0.0	1	0.5	0.5	0.000358745	0.0345352	SE
Orai3	ENSMUSG00000043964	+	chr7	127770216	127770733	127770878	127773556	12	2	2	2	4.66667	2	1.0,0.577,0.672	0.254,0.254	0.749667	0.254	0.496	0.000356066	0.0345352	SE
Tnk2	ENSMUSG00000022791	+	chr16	32680807	32680905	32680995	32681151	17	21	6	1	7.66667	11	0.732,0.377,0.614	1.0,0.804	0.574333	0.902	-0.328	0.000377917	0.0360376	SE
Nfat5	ENSMUSG00000003847	+	chr8	107324764	107338294	107338356	107338808	11	7	13	1	8	4	0.523,0.313,0.18	1.0,0.622	0.338667	0.811	-0.472	0.000390266	0.0368673	SE
Rap1gds1	ENSMUSG00000028149	-	chr3	138965996	138983721	138983868	139015545	18	7	2	4	6.66667	5.5	1.0,0.542,1.0	0.36,0.403	0.847333	0.3815	0.466	0.000415685	0.038905	SE
Tbc1d31	ENSMUSG00000022364	+	chr15	57916116	57919930	57920046	57922956	15	10	2	7	5.66667	8.5	1.0,0.779,0.44	0.407,0.282	0.739667	0.3445	0.395	0.000477609	0.0438879	SE
Odf2l	ENSMUSG00000028256	+	chr3	145126225	145127022	145127151	145127830	22	15	0	4	7.33333	9.5	1.0,1.0,1.0	0.495,0.72	1	0.6075	0.393	0.000476391	0.0438879	SE
Eif2a	ENSMUSG00000027810	+	chr3	58537608	58539589	58539646	58541039	112	99	0	7	37.3333	53	1.0,1.0,1.0	0.975,0.746	1	0.8605	0.139	0.00050299	0.0458038	SE
Stam2	ENSMUSG00000055371	-	chr2	52720968	52739162	52739480	52742060	3	10	25	12	9.33333	11	0.025,0.027,0.0	0.323,0.087	0.0173333	0.205	-0.188	0.000518953	0.0468355	SE
Qrich1	ENSMUSG00000006673	+	chr9	108517252	108518766	108518826	108528588	14	2	6	10	6.66667	6	0.455,0.455,1.0	0.122,0.085	0.636667	0.1035	0.533	0.000534215	0.0477862	SE
Sdcbp	ENSMUSG00000028249	+	chr4	6365759	6367639	6367808	6377076	2	6	3	1	1.66667	3.5	1.0,0.235,0.0	1.0,0.235	0.411667	0.6175	-0.206	0.000550437	0.0488054	SE
Akap11	ENSMUSG00000022016	-	chr14	78502236	78502938	78503022	78507724	12	11	0	4	4	7.5	1.0,1.0,1.0	0.768,0.386	1	0.577	0.423	0.000559145	0.0491464	SE

## Sheet: WT_DKO_MXE
Gene Identifier	Transcript Identifier	Strand	Chr	Upstream Exon End	X 1st Exon Start	X 1st Exon End	X 2nd Exon Start	X 2nd Exon End	Downstream Exon Start	IJC Sum 1	IJC Sum 2	SJC Sum 1	SJC Sum 2	Mean Counts 1	Mean Counts 2	IncLevel1	IncLevel2	Mean Inclusion1	Mean Inclusion2	IncLevelDifference	PValue	FDR	Event
Scube3	ENSMUSG00000038677	+	chr17	28165642	28165986	28166148	28166356	28166524	28167025	0	8	19	11	6.33333	9.5	0.0,0.0,0.0	0.545,0.17	0	0.3575	-0.358	1.42792e-06	0.000988121	MXE
Fgd4	ENSMUSG00000022788	-	chr16	16477513	16484089	16484597	16490422	16490606	16503985	1	11	56	63	19	37	0.0,0.101,0.0	0.31,0.243	0.0336667	0.2765	-0.243	4.82121e-06	0.00166814	MXE
Dis3l2	ENSMUSG00000053333	+	chr1	86760389	86791415	86791457	86812511	86812589	86821221	0	5	6	7	2	6	0.0,0.0,0.0	0.511,0.395	0	0.453	-0.453	1.09518e-05	0.00252621	MXE
Nlrp5-ps	ENSMUSG00000041596	-	chr7	14598451	14603139	14603190	14607239	14607320	14609261	11	2	1	4	4	3	0.764,1.0,1.0	0.0,0.618	0.921333	0.309	0.612	1.57483e-05	0.00272445	MXE
Lcorl	ENSMUSG00000015882	-	chr5	45775521	45776419	45776499	45795292	45795358	45857346	19	13	2	11	7	12	1.0,0.815,0.898	0.622,0.468	0.904333	0.545	0.359	2.15282e-05	0.00297951	MXE
Zbtb49	ENSMUSG00000029127	-	chr5	38205962	38210617	38210664	38213307	38214064	38216446	29	39	5	0	11.3333	19.5	0.617,0.328,0.54	1.0,1.0	0.495	1	-0.505	3.59045e-05	0.00414098	MXE
Flot1	ENSMUSG00000059714	+	chr17	35824202	35824278	35824369	35824565	35824709	35824832	2	17	26	42	9.33333	29.5	0.0,0.193,0.0	0.305,0.413	0.0643333	0.359	-0.295	4.3074e-05	0.00425817	MXE
Lnpk	ENSMUSG00000009207	-	chr2	74551101	74554987	74555046	74568940	74569128	74570934	23	14	7	0	10	7	1.0,0.471,0.576	1.0,1.0	0.682333	1	-0.318	8.19371e-05	0.0048618	MXE
Pbrm1	ENSMUSG00000042323	+	chr14	31107310	31113848	31114004	31117012	31117083	31117199	33	8	22	31	18.3333	19.5	0.477,0.587,0.436	0.136,0.147	0.5	0.1415	0.358	7.69068e-05	0.0048618	MXE
Tasp1	ENSMUSG00000039033	-	chr2	139977713	139985128	139985208	139996072	139996157	140008698	2	10	14	11	5.33333	10.5	0.244,0.139,0.0	0.492,0.421	0.127667	0.4565	-0.329	6.733e-05	0.0048618	MXE
Slc7a7	ENSMUSG00000000958	-	chr14	54377910	54378995	54379121	54408502	54409048	54416588	226	198	41	9	89	103.5	0.609,0.63,0.694	0.834,0.935	0.644333	0.8845	-0.24	7.26196e-05	0.0048618	MXE
Zbtb49	ENSMUSG00000029127	-	chr5	38205962	38210617	38210664	38213307	38214383	38216446	49	54	5	0	18	27	0.643,0.389,0.597	1.0,1.0	0.543	1	-0.457	8.43086e-05	0.0048618	MXE
Zfp330	ENSMUSG00000031711	-	chr8	82769399	82770800	82770871	82771338	82771358	82772879	0	4	20	7	6.66667	5.5	0.0,0.0,0.0	0.435,0.506	0	0.4705	-0.471	0.000102229	0.00544174	MXE
Sirt3	ENSMUSG00000025486	-	chr7	140865184	140865665	140865826	140867730	140867886	140869488	7	3	1	3	2.66667	3	1.0,0.671,1.0	0.505,0.505	0.890333	0.505	0.385	0.000147287	0.00728018	MXE
Arhgef40	ENSMUSG00000004562	+	chr14	52002462	52003653	52003758	52003972	52004116	52004611	7	5	12	1	6.33333	3	0.477,0.378,0.378	0.785,1.0	0.411	0.8925	-0.482	0.000237341	0.0109493	MXE
Mirg	ENSMUSG00000097391	+	chr12	109730868	109730965	109731103	109731241	109731355	109731716	28	15	1	5	9.66667	10	1.0,0.816,1.0	0.756,0.703	0.938667	0.7295	0.209	0.000399729	0.0162713	MXE
Dctn6	ENSMUSG00000031516	-	chr8	34097294	34098918	34099101	34104985	34105098	34106341	2	6	5	2	2.33333	4	0.0,0.0,0.733	0.407,1.0	0.244333	0.7035	-0.459	0.000397339	0.0162713	MXE
Tc2n	ENSMUSG00000021187	-	chr12	101652853	101665552	101665744	101678513	101678630	101688959	7	3	7	0	4.66667	1.5	1.0,0.582,0.357	1.0,1.0	0.646333	1	-0.354	0.000439871	0.0169106	MXE
Eif4a2	ENSMUSG00000022884	+	chr16	23110343	23110579	23110723	23111125	23111263	23111502	698	649	431	660	376.333	654.5	0.53,0.641,0.632	0.502,0.469	0.601	0.4855	0.115	0.000737778	0.0255271	MXE
Gas5	ENSMUSG00000053332	+	chr1	161036014	161036207	161036244	161036819	161037164	161037287	68	85	722	354	263.333	219.5	0.41,0.247,0.177	0.43,0.527	0.278	0.4785	-0.201	0.00073206	0.0255271	MXE
Mtdh	ENSMUSG00000022255	+	chr15	34114108	34114798	34114975	34116310	34116376	34117879	295	255	44	13	113	134	0.857,0.731,0.805	0.887,0.955	0.797667	0.921	-0.123	0.000794447	0.0261789	MXE
Dhdds	ENSMUSG00000012117	-	chr4	133982914	133991278	133991380	133992463	133992580	133994161	13	12	8	1	7	6.5	0.847,0.48,0.48	1.0,0.822	0.602333	0.911	-0.309	0.000961046	0.0302293	MXE
Garnl3	ENSMUSG00000038860	-	chr2	33064078	33085874	33085944	33104852	33105023	33130423	15	20	6	1	7	10.5	0.855,0.371,0.371	0.841,1.0	0.532333	0.9205	-0.388	0.00109809	0.0330382	MXE
Selenoi	ENSMUSG00000075703	+	chr5	30247531	30248411	30248520	30252709	30252784	30256077	13	10	2	7	5	8.5	0.449,1.0,0.71	0.62,0.352	0.719667	0.486	0.234	0.00115552	0.0333174	MXE
Yif1a	ENSMUSG00000024875	+	chr19	5091425	5091540	5091696	5092128	5092222	5092301	20	27	2	8	7.33333	17.5	1.0,0.687,0.868	0.713,0.709	0.851667	0.711	0.141	0.00127237	0.0352193	MXE

## Sheet: WT_DKO_A5SS
Gene Identifier	Transcript Identifier	Strand	Chr	Flanking Exon Start	Long Exon Start	Long Exon End	Short Exon Start	Short Exon End	Flanking Exon End	IJC Sum 1	IJC Sum 2	SJC Sum 1	SJC Sum 2	Mean Counts 1	Mean Counts 2	IncLevel1	IncLevel2	Mean Inclusion1	Mean Inclusion2	IncLevelDifference	PValue	FDR	Event
Hmga1	ENSMUSG00000046711	+	chr17	27559532	27556667	27557066	27556667	27556709	27559670	60	25	2	7	20.6667	16	0.747,0.776,1.0	0.342,0.41	0.841	0.376	0.465	1.88694e-05	0.00583536	A5SS
Gapvd1	ENSMUSG00000026867	-	chr2	34715204	34717252	34717382	34717315	34717382	34715330	13	20	10	1	7.66667	10.5	0.153,0.449,0.521	0.876,1.0	0.374333	0.938	-0.564	1.52856e-05	0.00583536	A5SS
Mtss1	ENSMUSG00000022353	-	chr15	58956432	58968827	58968913	58968838	58968913	58956590	1	9	40	27	13.6667	18	0.0,0.0,0.08	0.259,0.179	0.0266667	0.219	-0.192	1.44798e-05	0.00583536	A5SS
Xpo1	ENSMUSG00000020290	+	chr11	23271132	23267661	23268690	23267661	23267763	23271205	231	107	280	278	170.333	192.5	0.054,0.051,0.068	0.029,0.027	0.0576667	0.028	0.03	8.03956e-06	0.00583536	A5SS
Rbm10	ENSMUSG00000031060	+	chrX	20645768	20645436	20645597	20645436	20645594	20645866	3	8	8	1	3.66667	4.5	1.0,0.0,0.0	1.0,0.828	0.333333	0.914	-0.581	3.10094e-05	0.0068311	A5SS
Mis12	ENSMUSG00000040599	+	chr11	71024549	71019610	71020189	71019610	71019723	71024711	69	65	7	0	25.3333	32.5	1.0,0.581,0.444	1.0,1.0	0.675	1	-0.325	3.31339e-05	0.0068311	A5SS
Wdyhv1	ENSMUSG00000022359	+	chr15	58150605	58148333	58148441	58148333	58148433	58150656	1	3	7	1	2.66667	2	0.0,0.231,0.0	0.475,1.0	0.077	0.7375	-0.661	3.94186e-05	0.00696584	A5SS
Nelfe	ENSMUSG00000024369	+	chr17	34850910	34850407	34850674	34850407	34850462	34850993	3	4	3	0	2	2	0.207,0.0,1.0	1.0,1.0	0.402333	1	-0.598	7.36987e-05	0.010164	A5SS
Firre	ENSMUSG00000085396	-	chrX	50577870	50580580	50580949	50580812	50580949	50578024	129	85	9	0	46	42.5	0.806,0.849,0.705	1.0,1.0	0.786667	1	-0.213	7.395e-05	0.010164	A5SS
Stx5a	ENSMUSG00000010110	+	chr19	8748460	8743352	8743502	8743352	8743423	8748577	1	6	14	7	5	6.5	0.0,0.109,0.0	0.245,0.328	0.0363333	0.2865	-0.25	0.000146859	0.0122227	A5SS
Helq	ENSMUSG00000035266	-	chr5	100786983	100790125	100790236	100790138	100790236	100787082	9	1	6	11	5	6	0.46,0.221,1.0	0.109,0.0	0.560333	0.0545	0.506	0.000146186	0.0122227	A5SS
Tmem234	ENSMUSG00000028797	+	chr4	129602194	129600982	129601243	129600982	129601134	129602261	6	6	4	0	3.33333	3	0.671,0.0,0.169	1.0,1.0	0.28	1	-0.72	0.000148891	0.0122227	A5SS
Spata13	ENSMUSG00000021990	+	chr14	60709424	60706713	60707079	60706713	60707049	60709569	7	0	14	7	7	3.5	0.417,0.234,0.152	0.0,0.0	0.267667	0	0.268	0.000177856	0.0122227	A5SS
Dleu2	ENSMUSG00000097589	-	chr14	61643359	61648481	61648822	61648617	61648822	61643455	12	14	1	6	4.33333	10	0.262,1.0,1.0	0.372,0.516	0.754	0.444	0.31	0.000162795	0.0122227	A5SS
Sin3a	ENSMUSG00000042557	+	chr9	57119092	57118069	57118171	57118069	57118162	57119187	1	10	58	73	19.6667	41.5	0.0,0.0,0.041	0.156,0.075	0.0136667	0.1155	-0.102	0.000169981	0.0122227	A5SS
Strada	ENSMUSG00000069631	-	chr11	106173678	106187100	106187180	106187124	106187180	106173781	4	1	2	6	2	3.5	0.431,0.431,1.0	0.159,0.0	0.620667	0.0795	0.541	0.000132629	0.0122227	A5SS
Dcaf11	ENSMUSG00000022214	+	chr14	55562891	55561074	55561442	55561074	55561419	55563019	7	4	1	4	2.66667	4	0.605,1.0,1.0	0.534,0.277	0.868333	0.4055	0.463	0.000155018	0.0122227	A5SS
Dip2c	ENSMUSG00000048264	+	chr13	9615744	9614346	9614468	9614346	9614456	9615825	1	4	6	4	2.33333	4	0.463,0.0,0.0	0.463,0.463	0.154333	0.463	-0.309	0.000169269	0.0122227	A5SS
Dab2ip	ENSMUSG00000026883	+	chr2	35661491	35643887	35644124	35643887	35643991	35661625	4	0	1	7	1.66667	3.5	1.0,1.0,0.0	0.0,0.0	0.666667	0	0.667	0.000189831	0.012359	A5SS
Phkg2	ENSMUSG00000030815	+	chr7	127579666	127577534	127578029	127577534	127577688	127579732	13	36	4	0	5.66667	18	0.474,1.0,0.057	1.0,1.0	0.510333	1	-0.49	0.000362424	0.0224159	A5SS
Slc25a22	ENSMUSG00000019082	-	chr7	141432020	141432613	141432753	141432662	141432753	141432139	3	1	1	2	1.33333	1.5	0.0,1.0,1.0	0.377,0.0	0.666667	0.1885	0.478	0.000435209	0.0256359	A5SS
Arhgef2	ENSMUSG00000028059	+	chr3	88632912	88632275	88632339	88632275	88632333	88633042	17	19	2	9	6.33333	14	1.0,0.735,1.0	0.597,0.718	0.911667	0.6575	0.254	0.000491088	0.026412	A5SS
Mbd3	ENSMUSG00000035478	-	chr10	80395435	80399121	80399550	80399217	80399550	80395595	13	9	11	1	8	5	0.434,0.637,0.128	0.687,1.0	0.399667	0.8435	-0.444	0.000476568	0.026412	A5SS
Dennd2c	ENSMUSG00000007379	+	chr3	103149040	103146511	103146560	103146511	103146556	103149222	1	6	20	21	7	13.5	0.0,0.0,0.24	0.283,0.095	0.08	0.189	-0.109	0.000813034	0.0382252	A5SS
Kdm6a	ENSMUSG00000037369	+	chrX	18278625	18277375	18277563	18277375	18277546	18279936	1	6	10	16	3.66667	11	0.0,0.29,0.0	0.318,0.153	0.0966667	0.2355	-0.139	0.00082214	0.0382252	A5SS
Ccdc61	ENSMUSG00000074358	-	chr7	18893184	18893766	18893849	18893778	18893849	18893348	8	7	2	7	3.33333	7	1.0,0.564,1.0	0.564,0.223	0.854667	0.3935	0.461	0.000750719	0.0382252	A5SS
Tyw5	ENSMUSG00000048495	-	chr1	57396726	57401368	57401523	57401387	57401523	57396796	7	1	4	3	3.66667	2	1.0,0.347,0.761	0.285,0.0	0.702667	0.1425	0.56	0.000834341	0.0382252	A5SS
Taz	ENSMUSG00000009995	+	chrX	74289104	74288450	74289019	74288450	74288513	74289182	41	30	1	3	14	16.5	1.0,0.687,1.0	0.551,0.587	0.895667	0.569	0.327	0.000957372	0.0403103	A5SS
Fgfr2	ENSMUSG00000030849	-	chr7	130185228	130196171	130196374	130196177	130196374	130185380	3	2	4	0	2.33333	1	0.0,0.316,0.649	1.0,1.0	0.321667	1	-0.678	0.000977615	0.0403103	A5SS
Brd4	ENSMUSG00000024002	-	chr17	32229416	32252996	32253200	32253040	32253200	32229735	7	1	10	21	5.66667	11	0.136,0.387,0.387	0.0,0.136	0.303333	0.068	0.235	0.000957847	0.0403103	A5SS
Gas5	ENSMUSG00000053332	+	chr1	161037287	161036819	161037164	161036819	161036852	161037315	833	451	329	303	387.333	377	0.279,0.298,0.403	0.224,0.223	0.326667	0.2235	0.103	0.00103425	0.0412698	A5SS
Smg7	ENSMUSG00000042772	-	chr1	152846118	152848595	152849016	152848733	152849016	152846263	74	110	68	42	47.3333	76	0.207,0.326,0.287	0.507,0.428	0.273333	0.4675	-0.194	0.00114778	0.0417588	A5SS
Tek	ENSMUSG00000006386	+	chr4	94853368	94851722	94851877	94851722	94851874	94853579	5	3	0	3	1.66667	3	1.0,1.0,1.0	0.49,0.49	1	0.49	0.51	0.00114502	0.0417588	A5SS
Snhg4	ENSMUSG00000117694	+	chr18	35577557	35557336	35557391	35557336	35557369	35577619	6	8	1	4	2.33333	6	1.0,1.0,0.756	0.643,0.436	0.918667	0.5395	0.379	0.00109551	0.0417588	A5SS
Fmnl2	ENSMUSG00000036053	+	chr2	53131839	53130411	53130505	53130411	53130458	53133804	13	17	12	2	8.33333	9.5	0.506,0.435,0.269	0.831,0.847	0.403333	0.839	-0.436	0.00123307	0.043412	A5SS
Wnk3	ENSMUSG00000041245	+	chrX	151294421	151293809	151294041	151293809	151293900	151294552	1	4	7	2	2.66667	3	0.0,0.08,0.0	0.41,0.41	0.0266667	0.41	-0.383	0.00133359	0.043412	A5SS
Chd3	ENSMUSG00000018474	-	chr11	69345470	69346571	69346813	69346617	69346813	69345634	9	1	3	4	4	2.5	0.0,0.684,1.0	0.0,0.383	0.561333	0.1915	0.37	0.00129401	0.043412	A5SS
Ncor1	ENSMUSG00000018501	-	chr11	62353233	62354370	62354472	62354382	62354472	62353334	60	74	14	3	24.6667	38.5	0.812,0.853,0.689	0.949,0.964	0.784667	0.9565	-0.172	0.00133308	0.043412	A5SS
Mib2	ENSMUSG00000029060	-	chr4	155657854	155658893	155659265	155659122	155659265	155657959	17	23	1	4	6	13.5	1.0,1.0,0.33	0.787,0.397	0.776667	0.592	0.185	0.00142052	0.0439296	A5SS
Rnf220	ENSMUSG00000028677	-	chr4	117285378	117285850	117285972	117285928	117285972	117285511	38	37	7	1	15	19	0.761,0.71,0.71	0.893,1.0	0.727	0.9465	-0.22	0.00138808	0.0439296	A5SS
Nktr	ENSMUSG00000032525	+	chr9	121741121	121738387	121740075	121738387	121738415	121741151	210	131	1	3	70.3333	67	1.0,0.749,1.0	0.622,0.704	0.916333	0.663	0.253	0.00147251	0.0444267	A5SS
Fam114a2	ENSMUSG00000020523	-	chr11	57513635	57514073	57514288	57514094	57514288	57513735	2	7	34	29	12	18	0.072,0.0,0.061	0.135,0.182	0.0443333	0.1585	-0.114	0.00154663	0.0455521	A5SS

## Sheet: WT_DKO_A3SS
Gene Identifier	Transcript Identifier	Strand	Chr	Flanking Exon Start	Long Exon Start	Long Exon End	Short Exon Start	Short Exon End	Flanking Exon End	IJC Sum 1	IJC Sum 2	SJC Sum 1	SJC Sum 2	Mean Counts 1	Mean Counts 2	IncLevel1	IncLevel2	Mean Inclusion1	Mean Inclusion2	IncLevelDifference	PValue	FDR	Event
Gm2694	ENSMUSG00000097248	+	chr8	87524295	87525231	87525554	87525414	87525554	87524427	1	6	6	0	2.33333	3	0.0,0.088,0.0	1.0,1.0	0.0293333	1	-0.971	1.36984e-11	2.88762e-08	A3SS
Srsf4	ENSMUSG00000028911	+	chr4	131885308	131886106	131886304	131886130	131886304	131885492	4	3	10	0	4.66667	1.5	0.0,0.275,0.431	1.0,1.0	0.235333	1	-0.765	1.44179e-09	1.51965e-06	A3SS
Auts2	ENSMUSG00000029673	-	chr5	131476552	131474922	131475176	131474922	131475173	131477023	10	4	0	7	3.33333	5.5	1.0,1.0,1.0	0.49,0.0	1	0.245	0.755	1.25891e-08	8.84592e-06	A3SS
Myrf	ENSMUSG00000036098	-	chr19	10215741	10215016	10215105	10215016	10215102	10215810	7	9	0	8	2.33333	8.5	1.0,1.0,1.0	0.435,0.616	1	0.5255	0.475	3.82665e-08	2.01664e-05	A3SS
Glo1	ENSMUSG00000024026	-	chr17	30600038	30597804	30597892	30597804	30597872	30600179	6	0	1	4	2.33333	2	0.0,1.0,1.0	0.0,0.0	0.666667	0	0.667	1.65367e-07	6.97186e-05	A3SS
Sec24a	ENSMUSG00000036391	-	chr11	51731802	51729451	51729578	51729451	51729575	51731905	10	5	1	9	3.66667	7	0.794,1.0,1.0	0.391,0.243	0.931333	0.317	0.614	6.86163e-07	0.000241072	A3SS
Chtop	ENSMUSG00000001017	-	chr3	90507544	90506107	90507258	90506107	90506261	90507626	279	72	36	39	105	55.5	0.435,0.399,0.266	0.11,0.123	0.366667	0.1165	0.25	1.70104e-06	0.000512255	A3SS
Nr1h2	ENSMUSG00000060601	-	chr7	44553578	44552696	44552757	44552696	44552754	44553708	3	21	19	11	7.33333	16	0.0,0.161,0.243	0.714,0.562	0.134667	0.638	-0.503	2.67977e-06	0.00070612	A3SS
Trp53i11	ENSMUSG00000068735	+	chr2	93196896	93197461	93197748	93197608	93197748	93196978	18	10	6	0	8	5	0.36,0.67,0.542	1.0,1.0	0.524	1	-0.476	5.72203e-06	0.00134023	A3SS
Cpsf4	ENSMUSG00000029625	+	chr5	145177229	145178783	145178928	145178832	145178928	145177302	9	6	1	6	3.33333	6	0.645,1.0,1.0	0.377,0.377	0.881667	0.377	0.505	7.73876e-06	0.00163133	A3SS
Pkp4	ENSMUSG00000026991	+	chr2	59305304	59308084	59308557	59308089	59308557	59305492	10	5	0	5	3.33333	5	1.0,1.0,1.0	0.238,0.652	1	0.445	0.555	1.65858e-05	0.00241299	A3SS
Ulk4	ENSMUSG00000040936	-	chr9	121258728	121257299	121257421	121257299	121257418	121258821	1	2	3	0	1.33333	1	0.0,0.0,0.49	1.0,1.0	0.163333	1	-0.837	1.5396e-05	0.00241299	A3SS
Odr4	ENSMUSG00000006010	-	chr1	150390235	150388522	150388657	150388522	150388619	150390356	8	11	6	0	4.66667	5.5	0.469,0.399,0.499	1.0,1.0	0.455667	1	-0.544	1.83149e-05	0.00241299	A3SS
Cit	ENSMUSG00000029516	+	chr5	115997673	116005781	116006091	116005784	116006091	115997853	10	4	2	9	4	6.5	1.0,0.828,0.743	0.366,0.194	0.857	0.28	0.577	1.28744e-05	0.00241299	A3SS
Aire	ENSMUSG00000000731	-	chr10	78039661	78037872	78037988	78037872	78037985	78039742	1	9	4	4	1.66667	6.5	0.0,0.49,0.0	0.771,0.49	0.163333	0.6305	-0.467	1.73316e-05	0.00241299	A3SS
Tmc6	ENSMUSG00000025572	-	chr11	117772672	117770690	117770802	117770690	117770786	117772852	0	5	8	3	2.66667	4	0.0,0.0,0.0	0.452,1.0	0	0.726	-0.726	1.4658e-05	0.00241299	A3SS
Atp7a	ENSMUSG00000033792	+	chrX	106086088	106088334	106088517	106088337	106088517	106086814	4	5	14	1	6	3	0.49,0.121,0.0	0.794,1.0	0.203667	0.897	-0.693	2.04116e-05	0.00253104	A3SS
Lrig2	ENSMUSG00000032913	-	chr3	104463858	104462658	104462808	104462658	104462787	104464308	2	4	4	0	2	2	0.0,0.281,1.0	1.0,1.0	0.427	1	-0.573	2.62818e-05	0.00307789	A3SS
Cpsf4	ENSMUSG00000029625	+	chr5	145177229	145178757	145178928	145178832	145178928	145177302	14	13	1	6	5	9.5	0.667,1.0,1.0	0.5,0.538	0.889	0.519	0.37	3.10816e-05	0.00344842	A3SS
Zfp985	ENSMUSG00000065999	+	chr4	147562914	147577024	147577129	147577071	147577129	147562958	7	2	1	2	2.66667	2	1.0,0.381,1.0	0.381,0.381	0.793667	0.381	0.413	4.09745e-05	0.00431871	A3SS
Tmem134	ENSMUSG00000024845	+	chr19	4127759	4130856	4131075	4131030	4131075	4127836	9	5	0	3	3	4	1.0,1.0,1.0	0.311,0.376	1	0.3435	0.656	5.3279e-05	0.0053482	A3SS
Hipk3	ENSMUSG00000027177	-	chr2	104437850	104436996	104437120	104436996	104437069	104438007	6	6	5	0	3.66667	3	0.166,0.641,0.543	1.0,1.0	0.45	1	-0.55	6.01696e-05	0.00576534	A3SS
Atpaf2	ENSMUSG00000042709	-	chr11	60407293	60405775	60405877	60405775	60405856	60407391	1	7	10	10	3.66667	8.5	0.0,0.0,0.207	0.439,0.163	0.069	0.301	-0.232	7.60594e-05	0.00697101	A3SS
Nosip	ENSMUSG00000003421	+	chr7	45076309	45076551	45076739	45076626	45076739	45076428	24	10	0	4	8	7	1.0,1.0,1.0	0.571,0.5	1	0.5355	0.465	9.94423e-05	0.00873435	A3SS
Fbf1	ENSMUSG00000020776	-	chr11	116153952	116152476	116152947	116152476	116152944	116154052	7	8	1	6	2.66667	7	1.0,1.0,0.658	0.658,0.49	0.886	0.574	0.312	0.000107238	0.0090423	A3SS
Trp53i11	ENSMUSG00000068735	+	chr2	93196896	93197608	93197748	93197611	93197748	93196978	6	0	7	9	4.33333	4.5	0.366,0.325,1.0	0.0,0.0	0.563667	0	0.564	0.000122448	0.00992768	A3SS
Hsf1	ENSMUSG00000022556	+	chr15	76499947	76500130	76500336	76500266	76500336	76500053	15	9	5	0	6.66667	4.5	0.681,0.516,0.348	1.0,1.0	0.515	1	-0.485	0.000151721	0.0114224	A3SS
Flcn	ENSMUSG00000032633	-	chr11	59795749	59795140	59795575	59795140	59795264	59795863	8	7	1	3	3	5	1.0,0.437,1.0	0.493,0.163	0.812333	0.328	0.484	0.00015008	0.0114224	A3SS
Mbd6	ENSMUSG00000025409	-	chr10	127284334	127284042	127284215	127284042	127284212	127284485	1	4	4	3	1.66667	3.5	0.0,0.49,0.0	0.591,0.49	0.163333	0.5405	-0.377	0.000177673	0.012915	A3SS
Tbc1d24	ENSMUSG00000036473	-	chr17	24189943	24185203	24186287	24185203	24186201	24190053	6	6	1	3	2.33333	4.5	1.0,1.0,0.318	0.482,0.482	0.772667	0.482	0.291	0.000192399	0.0135192	A3SS
Ppp4r1	ENSMUSG00000061950	+	chr17	65783623	65803159	65803295	65803210	65803295	65783668	1	3	7	1	2.66667	2	0.0,0.229,0.0	0.543,1.0	0.0763333	0.7715	-0.695	0.000199551	0.0135695	A3SS
Pcbp2	ENSMUSG00000056851	+	chr15	102488204	102489751	102489807	102489754	102489807	102488277	108	74	6	18	38	46	1.0,0.941,0.909	0.812,0.777	0.95	0.7945	0.155	0.00024499	0.0161387	A3SS
Trip10	ENSMUSG00000019487	+	chr17	57261639	57262353	57262472	57262356	57262472	57261788	2	8	12	8	4.66667	8	0.325,0.138,0.0	0.325,0.591	0.154333	0.458	-0.304	0.000270762	0.0172959	A3SS
Brd7	ENSMUSG00000031660	-	chr8	88337080	88334104	88334219	88334104	88334216	88337137	10	1	40	45	16.6667	23	0.407,0.088,0.182	0.031,0.0	0.225667	0.0155	0.21	0.000319427	0.0198045	A3SS
Gnpda2	ENSMUSG00000029209	-	chr5	69584973	69579507	69582293	69579507	69579692	69585156	33	34	1	9	11.3333	21.5	0.201,1.0,1.0	0.101,0.089	0.733667	0.095	0.639	0.000371529	0.0223767	A3SS
Prpf40b	ENSMUSG00000023007	+	chr15	99314842	99315111	99315286	99315190	99315286	99314980	1	5	8	4	3	4.5	0.0,0.328,0.0	0.328,0.422	0.109333	0.375	-0.266	0.000434719	0.0254552	A3SS
Gtpbp1	ENSMUSG00000042535	+	chr15	79706991	79707694	79708043	79707868	79708043	79707172	102	99	7	0	36.3333	49.5	0.719,0.858,0.894	1.0,1.0	0.823667	1	-0.176	0.000467043	0.0266088	A3SS
Psip1	ENSMUSG00000028484	-	chr4	83463594	83461870	83462553	83461870	83462473	83463713	29	9	14	25	14.3333	17	0.744,0.592,0.404	0.195,0.1	0.58	0.1475	0.432	0.00049985	0.0277285	A3SS
Rps6ka6	ENSMUSG00000025665	-	chrX	111404677	111400207	111400284	111400207	111400269	111404839	35	9	4	8	13	8.5	0.87,0.909,0.862	0.51,0.455	0.880333	0.4825	0.398	0.000561065	0.0303263	A3SS
Prpf40b	ENSMUSG00000023007	+	chr15	99315190	99315479	99315569	99315482	99315569	99315286	9	9	2	9	3.66667	9	1.0,0.794,0.49	0.391,0.616	0.761333	0.5035	0.258	0.000650271	0.0334335	A3SS
Kctd9	ENSMUSG00000034327	+	chr14	67728649	67729223	67729409	67729350	67729409	67728746	1	7	12	13	4.33333	10	0.069,0.0,0.0	0.198,0.137	0.023	0.1675	-0.145	0.000643819	0.0334335	A3SS
Elf3	ENSMUSG00000003051	-	chr1	135257614	135257004	135257286	135257004	135257226	135257782	5	17	1	6	2	11.5	1.0,0.357,1.0	0.64,0.357	0.785667	0.4985	0.287	0.000673727	0.0338147	A3SS
Rsrc2	ENSMUSG00000029422	-	chr5	123743637	123740671	123740884	123740671	123740862	123743678	8	1	18	28	8.66667	14.5	0.399,0.162,0.099	0.0,0.046	0.22	0.023	0.197	0.000716372	0.0338383	A3SS
Gm38431	ENSMUSG00000111497	-	chr9	21080704	21080083	21080171	21080083	21080168	21080817	23	8	2	5	8.33333	6.5	1.0,1.0,0.828	0.49,0.706	0.942667	0.598	0.345	0.000716931	0.0338383	A3SS
Slbp	ENSMUSG00000004642	-	chr5	33651962	33645499	33646069	33645499	33645637	33652079	30	18	0	8	10	13	1.0,1.0,1.0	0.143,1.0	1	0.5715	0.428	0.000722354	0.0338383	A3SS
Map2k2	ENSMUSG00000035027	+	chr10	81118151	81118976	81119160	81119108	81119160	81118229	13	2	22	26	11.6667	14	0.108,0.165,0.266	0.022,0.035	0.179667	0.0285	0.151	0.000811609	0.0371929	A3SS
Jmjd1c	ENSMUSG00000037876	+	chr10	67215269	67218037	67218181	67218116	67218181	67215375	43	18	2	5	15	11.5	0.687,1.0,1.0	0.594,0.687	0.895667	0.6405	0.255	0.000993179	0.0445451	A3SS
Pum2	ENSMUSG00000020594	+	chr12	8713843	8718987	8719113	8719002	8719113	8713937	21	14	6	0	9	7	0.714,0.769,0.714	1.0,1.0	0.732333	1	-0.268	0.001074	0.0471667	A3SS
Zdhhc4	ENSMUSG00000001844	-	chr5	143328390	143326098	143326305	143326098	143326223	143328570	3	0	1	5	1.33333	2.5	1.0,1.0,0.0	0.0,0.0	0.666667	0	0.667	0.00110208	0.0474119	A3SS
Rnf10	ENSMUSG00000041740	-	chr5	115242392	115241769	115242061	115241769	115242058	115242551	82	96	19	5	33.6667	50.5	0.788,0.828,0.794	0.955,0.943	0.803333	0.949	-0.146	0.00116351	0.0480918	A3SS
Tubgcp4	ENSMUSG00000027263	+	chr2	121189361	121189823	121189965	121189826	121189965	121189469	2	3	3	0	1.66667	1.5	1.0,0.0,0.0	1.0,1.0	0.333333	1	-0.667	0.00116171	0.0480918	A3SS
Marchf2	ENSMUSG00000079557	-	chr17	33696036	33691514	33692203	33691514	33692153	33696246	1	4	6	3	2.33333	3.5	0.0,0.0,0.375	0.375,0.474	0.125	0.4245	-0.299	0.00128014	0.0499729	A3SS
Zfp568	ENSMUSG00000074221	+	chr7	29998114	30013839	30013889	30013842	30013889	29998210	65	49	9	23	24.6667	36	0.852,0.91,0.862	0.649,0.698	0.874667	0.6735	0.201	0.00127456	0.0499729	A3SS
Fbxo25	ENSMUSG00000038365	+	chr8	13929255	13931181	13931364	13931184	13931364	13929440	7	2	0	3	2.33333	2.5	1.0,1.0,1.0	0.658,0.0	1	0.329	0.671	0.00126187	0.0499729	A3SS

## Sheet: GFP_FL_RI
Gene Identifier	Transcript Identifier	Strand	Chr	Upstream Exon End	RI Exon start	RI Exon End	Downstream Exon Start	IJC Sum 1	IJC Sum 2	SJC Sum 1	SJC Sum 2	Mean Counts 1	Mean Counts 2	IncLevel1	IncLevel2	Mean Inclusion1	Mean Inclusion2	IncLevelDifference	PValue	FDR	Event
Stat2	ENSMUSG00000040033	+	chr10	128285083	128284946	128285454	128285271	2	9	7	0	4.5	4.5	0.0,0.102	1.0,1.0	0.051	1	-0.949	1.70186e-11	4.64438e-08	RI
Zswim8	ENSMUSG00000021819	+	chr14	20721659	20721170	20722029	20721869	2	4	0	6	1	5	1.0,1.0	0.345,0.095	1	0.22	0.78	2.12185e-10	2.89526e-07	RI
Cdiptos	ENSMUSG00000097075	-	chr7	126974510	126974452	126975084	126974939	1	3	3	0	2	1.5	0.069,0.0	1.0,1.0	0.0345	1	-0.966	2.07133e-09	1.88422e-06	RI
Sema3e	ENSMUSG00000063531	+	chr5	14225695	14225552	14226530	14226415	7	7	0	8	3.5	7.5	1.0,1.0	0.086,0.07	1	0.078	0.922	4.67035e-09	3.18634e-06	RI
Ppfia3	ENSMUSG00000003863	-	chr7	45340746	45340574	45340986	45340917	2	0	0	2	1	1	1.0,1.0	0.0,0.0	1	0	1	1.16887e-08	6.37971e-06	RI
Mlycd	ENSMUSG00000074064	+	chr8	119401593	119401480	119402590	119402433	3	6	3	0	3	3	0.141,0.039	1.0,1.0	0.09	1	-0.91	1.84879e-08	8.40893e-06	RI
Gucd1	ENSMUSG00000033416	-	chr10	75509833	75509591	75510123	75510031	4	4	0	5	2	4.5	1.0,1.0	0.216,0.171	1	0.1935	0.806	1.00815e-07	3.93035e-05	RI
Vldlr	ENSMUSG00000024924	+	chr19	27245681	27245534	27247090	27247009	10	7	0	3	5	5	1.0,1.0	0.074,0.176	1	0.125	0.875	1.37051e-07	4.67516e-05	RI
Ptpn18	ENSMUSG00000026126	+	chr1	34463183	34463106	34463364	34463268	0	5	2	1	1	3	0.0,0.0	0.484,1.0	0	0.742	-0.742	7.01566e-07	0.00021273	RI
Tmem191c	ENSMUSG00000055692	+	chr16	17276757	17276633	17276887	17276836	14	9	7	0	10.5	4.5	0.594,0.245	1.0,1.0	0.4195	1	-0.581	9.06519e-07	0.000247389	RI
Larp7	ENSMUSG00000027968	-	chr3	127546403	127546046	127546569	127546475	19	58	116	86	67.5	72	0.054,0.104	0.236,0.268	0.079	0.252	-0.173	1.60308e-06	0.000397709	RI
Tmem181b-ps	ENSMUSG00000096780	-	chr17	6447402	6447344	6448616	6448524	1	2	2	0	1.5	1	1.0,0.0	1.0,1.0	0.5	1	-0.5	3.39576e-06	0.000772253	RI
Fam129c	ENSMUSG00000043243	+	chr8	71605035	71604927	71605718	71605606	7	10	3	0	5	5	0.188,0.225	1.0,1.0	0.2065	1	-0.793	4.22043e-06	0.000885965	RI
Flt4	ENSMUSG00000020357	+	chr11	49626395	49626255	49626837	49626668	0	8	5	1	2.5	4.5	0.0,0.0	1.0,0.301	0	0.6505	-0.65	5.74722e-06	0.0011203	RI
Ankrd44	ENSMUSG00000052331	-	chr1	54657699	54657615	54659006	54658918	3	5	2	0	2.5	2.5	0.148,0.0	1.0,1.0	0.074	1	-0.926	9.62456e-06	0.00175103	RI
Dennd3	ENSMUSG00000036661	+	chr15	73568525	73568421	73568745	73568607	0	4	4	1	2	2.5	0.0,0.0	0.589,1.0	0	0.7945	-0.794	1.44169e-05	0.00245898	RI
Arhgap1	ENSMUSG00000027247	+	chr2	91651654	91651497	91651823	91651763	11	12	0	5	5.5	8.5	1.0,1.0	0.338,0.74	1	0.539	0.461	1.54128e-05	0.00247421	RI
Cdk9	ENSMUSG00000009555	-	chr2	32709615	32709466	32709944	32709772	8	27	61	37	34.5	32	0.041,0.04	0.244,0.15	0.0405	0.197	-0.157	4.26615e-05	0.00646796	RI
Tpra1	ENSMUSG00000002871	+	chr6	88910261	88910150	88910401	88910340	0	4	4	1	2	2.5	0.0,0.0	1.0,0.328	0	0.664	-0.664	4.80043e-05	0.00689493	RI
Pkmyt1	ENSMUSG00000023908	+	chr17	23735372	23735199	23735720	23735562	1	14	9	9	5	11.5	0.066,0.0	0.274,0.361	0.033	0.3175	-0.284	5.08326e-05	0.00693611	RI
Ppp1r16a	ENSMUSG00000033819	+	chr15	76692940	76692836	76693138	76693013	0	8	5	7	2.5	7.5	0.0,0.0	0.202,0.717	0	0.4595	-0.46	6.05242e-05	0.00786527	RI
Cdk20	ENSMUSG00000021483	+	chr13	64437512	64437388	64438032	64437876	4	5	2	0	3	2.5	0.255,0.255	1.0,1.0	0.255	1	-0.745	8.01868e-05	0.00896186	RI
Efr3b	ENSMUSG00000020658	-	chr12	3999717	3999589	4000956	4000879	3	7	2	0	2.5	3.5	0.029,1.0	1.0,1.0	0.5145	1	-0.486	8.20983e-05	0.00896186	RI
Tbp	ENSMUSG00000014767	+	chr17	15501202	15501153	15501357	15501311	16	9	1	7	8.5	8	1.0,0.74	0.234,0.449	0.87	0.3415	0.528	7.92589e-05	0.00896186	RI
Polrmt	ENSMUSG00000020329	-	chr10	79737713	79737263	79737886	79737799	0	8	15	8	7.5	8	0.0,0.0	0.104,0.449	0	0.2765	-0.277	7.6682e-05	0.00896186	RI
Plxna3	ENSMUSG00000031398	+	chrX	74335866	74335769	74336191	74336000	1	2	2	0	1.5	1	0.0,0.264	1.0,1.0	0.132	1	-0.868	9.69909e-05	0.00980326	RI
Cfap410	ENSMUSG00000020284	+	chr10	77979771	77979752	77980547	77980500	22	12	0	3	11	7.5	1.0,1.0	0.395,0.189	1	0.292	0.708	9.49864e-05	0.00980326	RI
Ccdc106	ENSMUSG00000035228	+	chr7	5059705	5059495	5060785	5060206	47	36	0	4	23.5	20	1.0,1.0	0.51,0.566	1	0.538	0.462	0.00011775	0.011176	RI
Fam161b	ENSMUSG00000021234	-	chr12	84356477	84355923	84357850	84357527	3	4	2	0	2.5	2	0.032,1.0	1.0,1.0	0.516	1	-0.484	0.000118763	0.011176	RI
Ctc1	ENSMUSG00000020898	+	chr11	69021193	69021029	69022614	69022392	66	78	0	4	33	41	1.0,1.0	0.646,0.48	1	0.563	0.437	0.000148854	0.0135407	RI
Thoc7	ENSMUSG00000053453	-	chr14	13953538	13953410	13954656	13954565	67	59	4	0	35.5	29.5	0.664,0.463	1.0,1.0	0.5635	1	-0.436	0.000154653	0.0136145	RI
Recql4	ENSMUSG00000033762	-	chr15	76705443	76705190	76705856	76705593	9	12	8	1	8.5	6.5	0.118,0.438	0.667,1.0	0.278	0.8335	-0.555	0.000175734	0.0138804	RI
Nolc1	ENSMUSG00000015176	+	chr19	46078758	46078702	46079021	46078857	1	9	2	0	1.5	4.5	0.301,0.0	1.0,1.0	0.1505	1	-0.85	0.000170906	0.0138804	RI
Cd40	ENSMUSG00000017652	+	chr2	165069715	165069628	165069848	165069816	3	1	0	2	1.5	1.5	1.0,1.0	0.0,0.299	1	0.1495	0.851	0.000164953	0.0138804	RI
Catsperg1	ENSMUSG00000049676	-	chr7	29190027	29189946	29190789	29190212	4	7	3	0	3.5	3.5	0.366,0.224	1.0,1.0	0.295	1	-0.705	0.000178019	0.0138804	RI
Fam133b	ENSMUSG00000058503	+	chr5	3558693	3558660	3559159	3559137	79	77	0	5	39.5	41	1.0,1.0	0.664,0.722	1	0.693	0.307	0.000234654	0.0177881	RI
Nle1	ENSMUSG00000020692	-	chr11	82903133	82902994	82904136	82904089	113	125	1	8	57	66.5	0.808,1.0	0.601,0.478	0.904	0.5395	0.365	0.000243931	0.0179915	RI
Trmt2b	ENSMUSG00000067369	-	chrX	134240180	134240078	134240569	134240354	2	1	0	2	1	1.5	1.0,1.0	1.0,0.0	1	0.5	0.5	0.000264164	0.0189712	RI
Camk2d	ENSMUSG00000053819	+	chr3	126770857	126770784	126771846	126771773	2	14	0	2	1	8	1.0,1.0	0.346,0.346	1	0.346	0.654	0.000310543	0.0217301	RI
Hsd3b7	ENSMUSG00000042289	+	chr7	127801246	127801074	127801616	127801460	8	6	3	0	5.5	3	0.438,0.342	1.0,1.0	0.39	1	-0.61	0.000342015	0.023334	RI
Coq6	ENSMUSG00000021235	+	chr12	84371031	84370255	84371558	84371450	4	17	2	1	3	9	0.132,0.313	0.577,1.0	0.2225	0.7885	-0.566	0.000364801	0.0240938	RI
Zswim8	ENSMUSG00000021819	+	chr14	20718918	20718759	20719225	20718996	0	7	8	12	4	9.5	0.0,0.0	0.551,0.089	0	0.32	-0.32	0.00037081	0.0240938	RI
Hsd3b7	ENSMUSG00000042289	+	chr7	127802398	127802235	127803802	127802785	14	21	5	1	9.5	11	0.351,0.245	1.0,0.678	0.298	0.839	-0.541	0.000404965	0.0257012	RI
Mtfmt	ENSMUSG00000059183	+	chr9	65440448	65440345	65441688	65441612	67	85	24	5	45.5	45	0.129,0.157	0.414,0.602	0.143	0.508	-0.365	0.000420538	0.0260829	RI
Snhg1	ENSMUSG00000108414	+	chr19	8725046	8725013	8725256	8725221	281	363	225	165	253	264	0.295,0.248	0.431,0.369	0.2715	0.4	-0.129	0.000450357	0.0271711	RI
Fibp	ENSMUSG00000024911	+	chr19	5463850	5463786	5464215	5464128	10	29	22	12	16	20.5	0.096,0.074	0.338,0.34	0.085	0.339	-0.254	0.000457996	0.0271711	RI
Rps5	ENSMUSG00000012848	+	chr7	12925865	12925736	12926494	12926395	158	220	1929	1587	1043.5	903.5	0.009,0.011	0.02,0.014	0.01	0.017	-0.007	0.000517629	0.0300555	RI
Inpp5e	ENSMUSG00000026925	-	chr2	26399348	26399232	26399574	26399412	7	8	7	1	7	4.5	0.35,0.35	0.519,1.0	0.35	0.7595	-0.41	0.000658152	0.0374187	RI
Atm	ENSMUSG00000034218	-	chr9	53533772	53533659	53533966	53533864	11	1	45	36	28	18.5	0.14,0.055	0.027,0.0	0.0975	0.0135	0.084	0.000752076	0.041886	RI
Atg16l2	ENSMUSG00000047767	-	chr7	101296573	101296507	101297008	101296756	15	2	1	4	8	3	1.0,0.699	0.068,1.0	0.8495	0.534	0.315	0.000814132	0.0444353	RI
Zbtb48	ENSMUSG00000028952	-	chr4	152021443	152021288	152021628	152021541	0	5	4	5	2	5	0.0,0.0	0.178,0.366	0	0.272	-0.272	0.000843177	0.0451182	RI
Slc35f6	ENSMUSG00000029175	+	chr5	30655666	30655494	30656100	30655887	7	1	3	5	5	3	0.503,0.275	0.078,0.0	0.389	0.039	0.35	0.000882968	0.0463388	RI
Dgcr2	ENSMUSG00000003166	-	chr16	17858570	17858359	17859526	17859403	40	38	8	1	24	19.5	0.611,0.199	0.623,1.0	0.405	0.8115	-0.406	0.000950662	0.0489501	RI

## Sheet: GFP_FL_SE
Gene Identifier	Transcript Identifier	Strand	Chr	Upstream Exon End	SE Exon start	SE Exon End	Downstream Exon Start	IJC Sum 1	IJC Sum 2	SJC Sum 1	SJC Sum 2	Mean Counts 1	Mean Counts 2	IncLevel1	IncLevel2	Mean Inclusion1	Mean Inclusion2	IncLevelDifference	PValue	FDR	Event
C2cd5	ENSMUSG00000030279	-	chr6	143018073	143020323	143020374	143029159	1	4	6	0	3.5	2	0.229,0.0	1.0,1.0	0.1145	1	-0.885	1.41912e-11	1.88899e-07	SE
Pxdc1	ENSMUSG00000021411	-	chr13	34630462	34637153	34637307	34638164	4	1	0	5	2	3	1.0,1.0	0.0,0.098	1	0.049	0.951	3.01389e-11	2.00589e-07	SE
Tmem241	ENSMUSG00000049411	-	chr18	12064239	12066615	12066707	12067059	3	3	12	0	7.5	1.5	0.082,0.183	1.0,1.0	0.1325	1	-0.867	2.27689e-09	7.57692e-06	SE
Tanc2	ENSMUSG00000053580	+	chr11	105713453	105758921	105759032	105776805	1	3	4	0	2.5	1.5	0.168,0.0	1.0,1.0	0.084	1	-0.916	1.85873e-09	7.57692e-06	SE
Inpp4a	ENSMUSG00000026113	+	chr1	37380060	37383338	37383371	37387697	0	4	3	0	1.5	2	0.0,0.0	1.0,1.0	0	1	-1	2.93903e-09	7.82429e-06	SE
Slc37a3	ENSMUSG00000029924	-	chr6	39367046	39372846	39372927	39377618	0	6	2	0	1	3	0.0,0.0	1.0,1.0	0	1	-1	3.53587e-09	7.84432e-06	SE
D3Ertd751e	ENSMUSG00000025766	+	chr3	41748733	41751094	41751198	41753588	0	4	2	0	1	2	0.0,0.0	1.0,1.0	0	1	-1	7.65524e-09	1.4557e-05	SE
Rps6kb1	ENSMUSG00000020516	-	chr11	86516191	86517150	86517249	86517349	2	0	0	2	1	1	1.0,1.0	0.0,0.0	1	0	1	1.59603e-08	2.65559e-05	SE
Rnf38	ENSMUSG00000035696	-	chr4	44152553	44158902	44159052	44187448	8	7	6	0	7	3.5	0.455,0.2	1.0,1.0	0.3275	1	-0.672	3.03549e-08	4.48948e-05	SE
Pnpla7	ENSMUSG00000036833	+	chr2	24976313	24978125	24978221	24980033	7	5	0	6	3.5	5.5	1.0,1.0	0.18,0.305	1	0.2425	0.758	4.21658e-08	5.61269e-05	SE
Ppp1r9a	ENSMUSG00000032827	+	chr6	5156240	5157003	5157027	5158088	6	3	28	0	17	1.5	0.431,0.104	1.0,1.0	0.2675	1	-0.732	9.62825e-08	0.000116511	SE
Rnf146	ENSMUSG00000038876	-	chr10	29354447	29361284	29361345	29361963	3	2	5	0	4	1	0.524,0.121	1.0,1.0	0.3225	1	-0.677	2.05622e-07	0.000228086	SE
Fam228b	ENSMUSG00000050545	-	chr12	4748351	4761858	4761987	4762326	1	5	3	0	2	2.5	0.0,0.269	1.0,1.0	0.1345	1	-0.865	3.39188e-07	0.000347303	SE
Rab3il1	ENSMUSG00000024663	+	chr19	10028503	10029473	10029620	10030149	3	2	4	0	3.5	1	0.253,0.145	1.0,1.0	0.199	1	-0.801	4.61764e-07	0.000439038	SE
Fancd2	ENSMUSG00000034023	+	chr6	113585543	113586209	113586248	113587381	16	14	10	0	13	7	0.458,0.606	1.0,1.0	0.532	1	-0.468	7.23774e-07	0.000642277	SE
Tmtc1	ENSMUSG00000030306	-	chr6	148262891	148269974	148270063	148271375	1	2	3	0	2	1	0.186,0.0	1.0,1.0	0.093	1	-0.907	7.77074e-07	0.000646477	SE
Zfyve16	ENSMUSG00000021706	-	chr13	92513929	92516530	92516692	92519466	19	17	0	6	9.5	11.5	1.0,1.0	0.635,0.322	1	0.4785	0.521	1.01854e-06	0.000797515	SE
Camk2g	ENSMUSG00000021820	-	chr14	20744648	20745791	20745860	20755658	1	12	12	5	6.5	8.5	0.061,0.0	0.566,0.549	0.0305	0.5575	-0.527	1.32495e-06	0.000801652	SE
Nrg4	ENSMUSG00000032311	-	chr9	55242207	55249095	55249169	55282550	1	4	3	0	2	2	0.201,0.0	1.0,1.0	0.1005	1	-0.899	1.15447e-06	0.000801652	SE
Ank2	ENSMUSG00000032826	-	chr3	126940146	126941609	126947807	126950734	257	374	0	6	128.5	190	1.0,1.0	0.385,0.464	1	0.4245	0.576	1.18149e-06	0.000801652	SE
Snx7	ENSMUSG00000028007	-	chr3	117782376	117800840	117800993	117829576	5	4	0	4	2.5	4	1.0,1.0	0.33,0.141	1	0.2355	0.764	1.29903e-06	0.000801652	SE
Cfap300	ENSMUSG00000053070	-	chr9	8022544	8023899	8023966	8025961	7	6	0	5	3.5	5.5	1.0,1.0	0.468,0.209	1	0.3385	0.661	1.30533e-06	0.000801652	SE
Tnrc18	ENSMUSG00000039477	-	chr5	142790189	142793004	142793160	142815014	0	6	3	1	1.5	3.5	0.0,0.0	0.394,1.0	0	0.697	-0.697	1.54577e-06	0.000894595	SE
N4bp3	ENSMUSG00000001053	-	chr11	51646274	51648007	51648162	51650677	16	2	10	23	13	12.5	0.339,0.352	0.0,0.048	0.3455	0.024	0.322	1.85295e-06	0.00102769	SE
Rab3il1	ENSMUSG00000024663	+	chr19	10027637	10028284	10028503	10030149	17	9	6	0	11.5	4.5	0.405,0.434	1.0,1.0	0.4195	1	-0.581	2.0013e-06	0.00106557	SE
Platr25	ENSMUSG00000074863	-	chr13	62706256	62708153	62708209	62712637	6	3	5	0	5.5	1.5	0.276,0.534	1.0,1.0	0.405	1	-0.595	2.11067e-06	0.00108058	SE
Ddhd1	ENSMUSG00000037697	-	chr14	45620840	45622840	45622942	45629579	9	15	5	0	7	7.5	0.298,0.56	1.0,1.0	0.429	1	-0.571	2.23567e-06	0.00110219	SE
Kif1c	ENSMUSG00000020821	+	chr11	70700709	70702431	70702551	70702771	13	8	0	5	6.5	6.5	1.0,1.0	0.224,0.658	1	0.441	0.559	2.38797e-06	0.00113523	SE
Tnnt1	ENSMUSG00000064179	-	chr7	4512283	4513580	4513613	4513810	6	0	3	6	4.5	3	0.51,0.676	0.0,0.0	0.593	0	0.593	3.01603e-06	0.00138436	SE
Setd4	ENSMUSG00000022948	-	chr16	93601798	93603136	93603196	93603565	7	1	1	3	4	2	1.0,0.625	0.0,0.357	0.8125	0.1785	0.634	3.92967e-06	0.0017324	SE
Smc6	ENSMUSG00000020608	+	chr12	11301667	11304514	11305286	11306077	61	27	35	66	48	46.5	0.146,0.124	0.027,0.041	0.135	0.034	0.101	4.0346e-06	0.0017324	SE
Tiam1	ENSMUSG00000002489	-	chr16	89898578	89908546	89908715	89955935	44	70	0	11	22	40.5	1.0,1.0	0.648,0.676	1	0.662	0.338	5.54864e-06	0.00230806	SE
Kif1c	ENSMUSG00000020821	+	chr11	70700709	70702445	70702551	70702771	12	8	0	5	6	6.5	1.0,1.0	0.172,0.713	1	0.4425	0.557	5.84308e-06	0.00235689	SE
Zfp934	ENSMUSG00000074865	-	chr13	62518730	62520171	62520232	62520417	4	0	1	4	2.5	2	1.0,0.623	0.0,0.0	0.8115	0	0.811	6.1989e-06	0.00236107	SE
Bptf	ENSMUSG00000040481	-	chr11	107086897	107095001	107095190	107095715	44	60	7	0	25.5	30	0.519,0.78	1.0,1.0	0.6495	1	-0.351	6.33642e-06	0.00236107	SE
Clasp1	ENSMUSG00000064302	+	chr1	118539369	118541674	118541698	118543104	1	5	3	0	2	2.5	0.275,0.0	1.0,1.0	0.1375	1	-0.863	6.3856e-06	0.00236107	SE
Zcchc2	ENSMUSG00000038866	+	chr1	106004176	106006014	106006086	106011701	29	18	0	6	14.5	12	1.0,1.0	0.697,0.534	1	0.6155	0.385	7.34282e-06	0.00264163	SE
Sparc	ENSMUSG00000018593	-	chr11	55409997	55420078	55420200	55423000	5	4	4	0	4.5	2	0.432,0.16	1.0,1.0	0.296	1	-0.704	7.9382e-06	0.00278067	SE
Fndc3c1	ENSMUSG00000033737	-	chrX	106473181	106473830	106473913	106484944	4	9	0	5	2	7	1.0,1.0	0.322,0.704	1	0.513	0.487	9.78726e-06	0.00334047	SE
Kif1c	ENSMUSG00000020821	+	chr11	70700709	70702371	70702551	70702771	17	18	0	5	8.5	11.5	1.0,1.0	0.424,0.702	1	0.563	0.437	1.05568e-05	0.00351304	SE
Lrp8	ENSMUSG00000028613	+	chr4	107847566	107850103	107850142	107851307	0	5	3	2	1.5	3.5	0.0,0.0	0.397,1.0	0	0.6985	-0.699	1.18878e-05	0.00385947	SE
Myb	ENSMUSG00000019982	-	chr10	21143092	21144968	21145325	21146185	22	9	1	9	11.5	9	1.0,0.581	0.148,0.148	0.7905	0.148	0.642	1.45856e-05	0.0046226	SE
Pnpla7	ENSMUSG00000036833	+	chr2	24976313	24978125	24978221	24980712	6	2	0	3	3	2.5	1.0,1.0	0.18,0.305	1	0.2425	0.758	1.61097e-05	0.00498688	SE
Mpdz	ENSMUSG00000028402	-	chr4	81310319	81313499	81313598	81317593	6	5	0	4	3	4.5	1.0,1.0	0.463,0.301	1	0.382	0.618	1.70922e-05	0.00505587	SE
Mbtd1	ENSMUSG00000059474	+	chr11	93886121	93887021	93887073	93905158	8	5	5	0	6.5	2.5	0.542,0.441	1.0,1.0	0.4915	1	-0.508	1.67189e-05	0.00505587	SE
Arap3	ENSMUSG00000024451	-	chr18	37973651	37974101	37974140	37974364	1	4	3	1	2	2.5	0.0,0.397	1.0,0.664	0.1985	0.832	-0.634	1.9198e-05	0.00545509	SE
Vill	ENSMUSG00000038775	+	chr9	119068456	119069882	119070068	119070277	15	20	0	5	7.5	12.5	1.0,1.0	0.393,0.76	1	0.5765	0.423	1.92615e-05	0.00545509	SE
Myo18a	ENSMUSG00000000631	+	chr11	77821186	77822662	77822674	77823275	0	8	8	12	4	10	0.0,0.0	0.381,0.341	0	0.361	-0.361	2.07998e-05	0.00565032	SE
Fndc3c1	ENSMUSG00000033737	-	chrX	106473181	106473830	106473947	106484944	5	15	0	5	2.5	10	1.0,1.0	0.439,0.732	1	0.5855	0.414	2.04334e-05	0.00565032	SE
Rbm39	ENSMUSG00000027620	-	chr2	156174974	156176402	156176457	156177335	1	4	3	1	2	2.5	0.224,0.0	0.536,1.0	0.112	0.768	-0.656	2.34257e-05	0.00611838	SE
Ube2q2	ENSMUSG00000032307	+	chr9	55163069	55168202	55168307	55176190	126	54	0	7	63	30.5	1.0,1.0	0.776,0.751	1	0.7635	0.236	2.34421e-05	0.00611838	SE
Syt14	ENSMUSG00000016200	-	chr1	192980561	192983519	192984911	192986717	154	135	0	5	77	70	1.0,1.0	0.635,0.533	1	0.584	0.416	2.56131e-05	0.00643275	SE
9430038I01Rik	ENSMUSG00000040139	-	chr7	137376351	137376954	137377117	137387370	2	13	17	6	9.5	9.5	0.043,0.031	0.362,0.558	0.037	0.46	-0.423	2.53595e-05	0.00643275	SE
Brd4	ENSMUSG00000024002	-	chr17	32229735	32252996	32253200	32284062	41	53	10	1	25.5	27	0.63,0.458	1.0,0.843	0.544	0.9215	-0.377	2.71092e-05	0.00668242	SE
Snrnp70	ENSMUSG00000063511	-	chr7	45394815	45395092	45395172	45395508	20	2	92	81	56	41.5	0.133,0.062	0.028,0.0	0.0975	0.014	0.084	3.00535e-05	0.0072735	SE
Jam2	ENSMUSG00000053062	+	chr16	84816373	84818757	84818775	84821259	5	3	5	0	5	1.5	0.446,0.446	1.0,1.0	0.446	1	-0.554	3.42377e-05	0.00813818	SE
Pigx	ENSMUSG00000023791	-	chr16	32085337	32087293	32087507	32092343	97	80	0	8	48.5	44	1.0,1.0	0.578,0.918	1	0.748	0.252	4.44095e-05	0.0103708	SE
Zfp235	ENSMUSG00000047603	+	chr7	24137172	24138292	24138502	24140299	6	1	1	4	3.5	2.5	1.0,0.345	0.116,0.0	0.6725	0.058	0.614	4.64662e-05	0.0104832	SE
Znhit1	ENSMUSG00000059518	-	chr5	136985049	136986125	136986255	136986810	1	5	2	1	1.5	3	0.268,0.0	1.0,0.594	0.134	0.797	-0.663	4.60449e-05	0.0104832	SE
Zzz3	ENSMUSG00000039068	+	chr3	152428832	152446628	152446689	152446798	2	12	35	19	18.5	15.5	0.038,0.026	0.3,0.216	0.032	0.258	-0.226	6.01357e-05	0.0132557	SE
Acbd5	ENSMUSG00000026781	+	chr2	23068286	23068879	23069065	23069450	2	2	0	2	1	2	1.0,1.0	0.223,0.223	1	0.223	0.777	6.07467e-05	0.0132557	SE
Kif1b	ENSMUSG00000063077	-	chr4	149215025	149220541	149220790	149222226	2	11	2	1	2	6	0.316,0.0	1.0,0.618	0.158	0.809	-0.651	6.59592e-05	0.0137185	SE
Arhgef12	ENSMUSG00000059495	-	chr9	43027295	43040539	43040596	43042590	7	0	11	17	9	8.5	0.46,0.202	0.0,0.0	0.331	0	0.331	6.39493e-05	0.0137185	SE
Dip2c	ENSMUSG00000048264	+	chr13	9493176	9494833	9495001	9506578	11	7	1	10	6	8.5	0.649,1.0	0.081,0.34	0.8245	0.2105	0.614	6.49528e-05	0.0137185	SE
Zfp532	ENSMUSG00000042439	+	chr18	65580510	65582726	65582809	65622983	2	6	3	0	2.5	3	0.192,0.322	1.0,1.0	0.257	1	-0.743	7.34249e-05	0.0149885	SE
Col11a1	ENSMUSG00000027966	+	chr3	114213286	114216970	114217204	114218680	5	5	3	0	4	2.5	0.195,0.327	1.0,1.0	0.261	1	-0.739	7.43176e-05	0.0149885	SE
Sun1	ENSMUSG00000036817	+	chr5	139226885	139229752	139229944	139230772	131	117	8	0	69.5	58.5	0.872,0.765	1.0,1.0	0.8185	1	-0.181	7.99064e-05	0.0158751	SE
Nrros	ENSMUSG00000052384	-	chr16	32147673	32163252	32163397	32165379	3	1	0	2	1.5	1.5	1.0,1.0	0.0,0.254	1	0.127	0.873	8.28361e-05	0.0162152	SE
Aim2	ENSMUSG00000037860	+	chr1	173419555	173420570	173420686	173427758	19	8	5	0	12	4	0.329,0.846	1.0,1.0	0.5875	1	-0.412	9.39914e-05	0.0181322	SE
Snrnp70	ENSMUSG00000063511	-	chr7	45380818	45381824	45383184	45383803	600	867	447	384	523.5	625.5	0.071,0.06	0.113,0.097	0.0655	0.105	-0.04	9.5577e-05	0.0181747	SE
Dpy19l1	ENSMUSG00000043067	-	chr9	24475453	24477648	24477827	24481928	12	0	18	11	15	5.5	0.262,0.12	0.0,0.0	0.191	0	0.191	9.89678e-05	0.0185544	SE
Med12l	ENSMUSG00000056476	+	chr3	59091621	59092693	59092798	59093518	7	0	5	2	6	1	0.455,0.342	0.0,0.0	0.3985	0	0.399	0.000103754	0.0189188	SE
Brd4	ENSMUSG00000024002	-	chr17	32229735	32253040	32253200	32284062	52	51	10	1	31	26	0.734,0.542	1.0,0.875	0.638	0.9375	-0.299	0.000102457	0.0189188	SE
Tmub2	ENSMUSG00000034757	+	chr11	102285088	102285979	102286116	102287307	4	1	1	6	2.5	3.5	0.414,1.0	0.15,0.0	0.707	0.075	0.632	0.000106212	0.0191052	SE
Zfp2	ENSMUSG00000049321	-	chr11	50901291	50905605	50905686	50906085	7	6	4	0	5.5	3	0.591,0.391	1.0,1.0	0.491	1	-0.509	0.000109644	0.0194596	SE
Sult6b1	ENSMUSG00000038045	-	chr17	78885216	78888930	78889087	78890845	93	63	0	6	46.5	34.5	1.0,1.0	0.921,0.636	1	0.7785	0.222	0.000111168	0.0194704	SE
Tmub2	ENSMUSG00000034757	+	chr11	102285088	102285663	102285718	102287307	9	5	1	6	5	5.5	0.776,1.0	0.366,0.302	0.888	0.334	0.554	0.00011515	0.0199059	SE
Lpin1	ENSMUSG00000020593	-	chr12	16568519	16571163	16571262	16573659	8	4	1	7	4.5	5.5	1.0,0.633	0.079,0.393	0.8165	0.236	0.581	0.000119342	0.0203661	SE
Nnat	ENSMUSG00000067786	+	chr2	157560260	157560447	157560535	157561212	8	3	1	5	4.5	4	1.0,0.58	0.315,0.187	0.79	0.251	0.539	0.00012422	0.0209302	SE
Idh3g	ENSMUSG00000002010	-	chrX	73782103	73782297	73782309	73782674	22	5	59	75	40.5	40	0.187,0.294	0.022,0.085	0.2405	0.0535	0.187	0.000129906	0.0216148	SE
Ndrg4	ENSMUSG00000036564	+	chr8	95709954	95710645	95710711	95710933	4	7	0	4	2	5.5	1.0,1.0	0.47,0.515	1	0.4925	0.508	0.000135319	0.022081	SE
Slc39a14	ENSMUSG00000022094	-	chr14	70310975	70313600	70313770	70315663	57	52	6	0	31.5	26	0.71,0.793	1.0,1.0	0.7515	1	-0.248	0.000136026	0.022081	SE
Gpatch4	ENSMUSG00000028069	+	chr3	88043179	88043466	88043601	88051161	21	22	1	9	11	15.5	1.0,0.823	0.436,0.517	0.9115	0.4765	0.435	0.000138023	0.0221353	SE
Dis3l2	ENSMUSG00000053333	+	chr1	86760389	86791415	86791457	86812511	3	0	1	2	2	1	0.562,1.0	0.0,0.0	0.781	0	0.781	0.00014408	0.0228315	SE
Prpf38b	ENSMUSG00000027881	-	chr3	108905334	108905917	108905988	108907786	1	11	77	54	39	32.5	0.017,0.0	0.146,0.049	0.0085	0.0975	-0.089	0.000152112	0.0238208	SE
Huwe1	ENSMUSG00000025261	+	chrX	151803569	151803755	151803802	151804445	0	3	3	1	1.5	2	0.0,0.0	0.551,1.0	0	0.7755	-0.776	0.000173154	0.0268007	SE
Atp5h	ENSMUSG00000034566	-	chr11	115418516	115419191	115419293	115419891	2	6	3	1	2.5	3.5	0.0,0.459	0.56,1.0	0.2295	0.78	-0.55	0.000180357	0.0275946	SE
Sema6a	ENSMUSG00000019647	-	chr18	47249584	47270608	47270773	47276585	8	36	0	5	4	20.5	1.0,1.0	0.625,0.758	1	0.6915	0.308	0.000197407	0.0298601	SE
Taf5	ENSMUSG00000025049	+	chr19	47078897	47080540	47080705	47081808	75	88	8	1	41.5	44.5	0.802,0.692	0.931,1.0	0.747	0.9655	-0.219	0.000207246	0.0307146	SE
Zfand6	ENSMUSG00000030629	-	chr7	84634409	84652881	84653042	84689745	7	5	3	0	5	2.5	0.443,0.389	1.0,1.0	0.416	1	-0.584	0.000207671	0.0307146	SE
Clcc1	ENSMUSG00000027884	+	chr3	108654051	108654591	108654750	108661354	2	7	4	1	3	4	0.138,0.138	1.0,0.49	0.138	0.745	-0.607	0.000225857	0.0329323	SE
Plekha4	ENSMUSG00000040428	+	chr7	45549965	45553244	45553294	45553568	2	5	3	1	2.5	3	0.375,0.0	0.643,1.0	0.1875	0.8215	-0.634	0.000230045	0.0329323	SE
Phkg2	ENSMUSG00000030815	+	chr7	127577646	127577974	127578029	127579666	4	11	4	1	4	6	0.366,0.366	1.0,0.743	0.366	0.8715	-0.505	0.000230088	0.0329323	SE
Pitpnm2	ENSMUSG00000029406	-	chr5	124124087	124124797	124124959	124125298	1	13	2	2	1.5	7.5	0.0,0.24	0.689,0.655	0.12	0.672	-0.552	0.000233685	0.0330913	SE
Tbl1xr1	ENSMUSG00000027630	+	chr3	22077427	22102866	22102947	22148941	4	1	0	2	2	1.5	1.0,1.0	0.325,0.0	1	0.1625	0.838	0.000239643	0.0335778	SE
Kmt5c	ENSMUSG00000059851	+	chr7	4740239	4740720	4740818	4741779	12	4	1	4	6.5	4	0.722,1.0	0.565,0.126	0.861	0.3455	0.516	0.000246874	0.0342306	SE
Rims2	ENSMUSG00000037386	+	chr15	39586785	39610063	39610141	39616268	2	1	0	2	1	1.5	1.0,1.0	0.329,0.0	1	0.1645	0.836	0.000254986	0.0346339	SE
Pcmtd1	ENSMUSG00000051285	+	chr1	7089216	7120193	7120615	7147636	183	146	0	6	91.5	76	1.0,1.0	0.794,0.782	1	0.788	0.212	0.00025363	0.0346339	SE
Mief1	ENSMUSG00000022412	+	chr15	80234181	80234681	80234780	80235804	23	6	1	4	12	5	0.838,1.0	0.633,0.223	0.919	0.428	0.491	0.000258512	0.0347581	SE
Cep170	ENSMUSG00000057335	-	chr1	176758517	176761350	176761500	176769232	42	28	10	1	26	14.5	0.615,0.545	0.833,1.0	0.58	0.9165	-0.336	0.000274303	0.0365009	SE
Runx1t1	ENSMUSG00000006586	+	chr4	13751748	13771375	13771545	13835632	3	1	0	2	1.5	1.5	1.0,1.0	0.0,1.0	1	0.5	0.5	0.000277114	0.0365009	SE
Creb1	ENSMUSG00000025958	+	chr1	64558649	64559726	64559768	64566216	0	6	5	12	2.5	9	0.0,0.0	0.097,0.348	0	0.2225	-0.222	0.0002797	0.0365009	SE
Sun1	ENSMUSG00000036817	+	chr5	139226885	139230772	139230838	139233470	17	4	5	0	11	2	0.68,0.615	1.0,1.0	0.6475	1	-0.353	0.000283492	0.0366366	SE
Rab11fip1	ENSMUSG00000031488	-	chr8	27150803	27151596	27153159	27154145	400	313	1	7	200.5	160	0.897,1.0	0.567,0.796	0.9485	0.6815	0.267	0.000298464	0.0382005	SE
Dpp7	ENSMUSG00000026958	-	chr2	25353516	25353607	25353726	25354232	47	47	1	8	24	27.5	0.885,1.0	0.72,0.676	0.9425	0.698	0.245	0.000307869	0.039029	SE
Cbx5	ENSMUSG00000009575	-	chr15	103213254	103215021	103215125	103215267	29	33	7	1	18	17	0.653,0.606	0.893,1.0	0.6295	0.9465	-0.317	0.000320937	0.0395554	SE
Fnbp4	ENSMUSG00000008200	+	chr2	90768700	90774749	90774848	90775904	4	18	35	26	19.5	22	0.022,0.075	0.264,0.198	0.0485	0.231	-0.182	0.000320615	0.0395554	SE
Zfp990	ENSMUSG00000078503	+	chr4	145520885	145528690	145528864	145530811	7	0	8	8	7.5	4	0.131,0.376	0.0,0.0	0.2535	0	0.254	0.000317318	0.0395554	SE
Cbx5	ENSMUSG00000009575	-	chr15	103213254	103215021	103215121	103215267	29	33	7	1	18	17	0.659,0.611	0.896,1.0	0.635	0.948	-0.313	0.000330353	0.0399757	SE
Atp11a	ENSMUSG00000031441	+	chr8	12859479	12861639	12861724	12861911	4	3	3	0	3.5	1.5	0.413,0.319	1.0,1.0	0.366	1	-0.634	0.000330124	0.0399757	SE
Glrx3	ENSMUSG00000031068	+	chr7	137445087	137452452	137452541	137452696	1	11	34	35	17.5	23	0.0,0.024	0.146,0.107	0.012	0.1265	-0.115	0.000335681	0.0402545	SE
Slc37a3	ENSMUSG00000029924	-	chr6	39367046	39372078	39372137	39372846	12	8	0	4	6	6	1.0,1.0	0.427,0.691	1	0.559	0.441	0.000348184	0.041381	SE
9930021J03Rik	ENSMUSG00000046138	-	chr19	29723505	29729831	29729959	29735115	10	1	12	15	11	8	0.372,0.095	0.05,0.0	0.2335	0.025	0.208	0.00037133	0.0437414	SE
Ncaph	ENSMUSG00000034906	-	chr2	127127722	127133398	127133570	127133848	10	12	1	10	5.5	11	1.0,0.68	0.336,0.233	0.84	0.2845	0.556	0.000376804	0.043904	SE
Shkbp1	ENSMUSG00000089832	-	chr7	27345328	27347001	27347172	27348331	49	46	0	5	24.5	25.5	1.0,1.0	0.67,0.799	1	0.7345	0.265	0.000379308	0.043904	SE
Cacnb3	ENSMUSG00000003352	+	chr15	98640750	98640958	98640978	98641176	21	12	1	6	11	9	0.897,1.0	0.441,0.703	0.9485	0.572	0.377	0.000387493	0.0444648	SE
Top3b	ENSMUSG00000022779	+	chr16	16870829	16875068	16875155	16877831	13	16	6	1	9.5	8.5	0.519,0.481	1.0,0.787	0.5	0.8935	-0.393	0.000393863	0.0448095	SE
Banp	ENSMUSG00000025316	+	chr8	121978754	121989954	121990071	121991527	38	35	8	1	23	18	0.504,0.765	1.0,0.875	0.6345	0.9375	-0.303	0.000429302	0.0484274	SE
Fam49b	ENSMUSG00000022378	-	chr15	63956682	63970929	63970968	63997897	29	33	7	1	18	17	0.778,0.681	1.0,0.933	0.7295	0.9665	-0.237	0.000438358	0.0486249	SE
Phtf2	ENSMUSG00000039987	-	chr5	20802066	20803184	20803350	20805654	97	70	6	0	51.5	35	0.948,0.708	1.0,1.0	0.828	1	-0.172	0.000435952	0.0486249	SE
Hnrnpl	ENSMUSG00000015165	+	chr7	28808859	28810671	28811168	28813278	62	45	0	4	31	24.5	1.0,1.0	0.743,0.501	1	0.622	0.378	0.000444284	0.0487127	SE
Cpsf4l	ENSMUSG00000018727	-	chr11	113699982	113702055	113702095	113702412	21	25	7	1	14	13	0.62,0.705	1.0,0.867	0.6625	0.9335	-0.271	0.000446469	0.0487127	SE
Nasp	ENSMUSG00000028693	-	chr4	116605763	116610402	116611377	116611971	9117	8211	38	73	4577.5	4142	0.931,0.958	0.872,0.905	0.9445	0.8885	0.056	0.000453527	0.0490805	SE

## Sheet: GFP_FL_MXE
Gene Identifier	Transcript Identifier	Strand	Chr	Upstream Exon End	X 1st Exon Start	X 1st Exon End	X 2nd Exon Start	X 2nd Exon End	Downstream Exon Start	IJC Sum 1	IJC Sum 2	SJC Sum 1	SJC Sum 2	Mean Counts 1	Mean Counts 2	IncLevel1	IncLevel2	Mean Inclusion1	Mean Inclusion2	IncLevelDifference	PValue	FDR	Event
Creb1	ENSMUSG00000025958	+	chr1	64558649	64559726	64559768	64561752	64561865	64566216	0	6	4	2	2	4	0.0,0.0	0.616,0.889	0	0.7525	-0.752	1.78778e-09	1.74666e-06	MXE
Lrp8	ENSMUSG00000028613	+	chr4	107847566	107848280	107848403	107850103	107850142	107851307	4	2	0	5	2	3.5	1.0,1.0	0.224,0.161	1	0.1925	0.807	3.37349e-07	0.000164795	MXE
Tpra1	ENSMUSG00000002871	+	chr6	88910261	88910340	88910401	88910547	88910650	88910796	4	0	3	8	3.5	4	0.797,0.396	0.0,0.0	0.5965	0	0.597	6.77585e-05	0.01655	MXE
Mrpl48	ENSMUSG00000030706	-	chr7	100559917	100565193	100565279	100571251	100571289	100574461	9	0	54	41	31.5	20.5	0.192,0.192	0.0,0.0	0.192	0	0.192	5.36999e-05	0.01655	MXE

## Sheet: GFP_FL_A5SS
Gene Identifier	Transcript Identifier	Strand	Chr	Flanking Exon Start	Long Exon Start	Long Exon End	Short Exon Start	Short Exon End	Flanking Exon End	IJC Sum 1	IJC Sum 2	SJC Sum 1	SJC Sum 2	Mean Counts 1	Mean Counts 2	IncLevel1	IncLevel2	Mean Inclusion1	Mean Inclusion2	IncLevelDifference	PValue	FDR	Event
Prdm15	ENSMUSG00000014039	-	chr16	97816535	97816848	97817045	97816863	97817045	97816630	7	0	5	7	6	3.5	0.556,0.526	0.0,0.0	0.541	0	0.541	4.15504e-06	0.00373424	A5SS
Irak3	ENSMUSG00000020227	-	chr10	120146430	120165040	120165211	120165092	120165211	120146629	2	7	0	5	1	6	1.0,1.0	0.228,0.542	1	0.385	0.615	4.95258e-06	0.00373424	A5SS
Tdrd5	ENSMUSG00000060985	-	chr1	156300596	156301513	156301906	156301744	156301906	156300790	10	19	4	0	7	9.5	0.329,0.424	1.0,1.0	0.3765	1	-0.623	1.59328e-05	0.00600666	A5SS
Lrmp	ENSMUSG00000030263	+	chr6	145138181	145137459	145138086	145137459	145137607	145138263	25	8	1	6	13	7	1.0,0.74	0.213,0.119	0.87	0.166	0.704	1.53207e-05	0.00600666	A5SS
Itgal	ENSMUSG00000030830	+	chr7	127321894	127317276	127317366	127317276	127317363	127321948	0	3	4	1	2	2	0.0,0.0	1.0,0.658	0	0.829	-0.829	2.46949e-05	0.00744798	A5SS
Hsd3b7	ENSMUSG00000042289	+	chr7	127801460	127801074	127801363	127801074	127801246	127801616	3	4	3	0	3	2	0.281,0.281	1.0,1.0	0.281	1	-0.719	3.17414e-05	0.00797767	A5SS
Rnaset2b	ENSMUSG00000094724	+	chr17	6988721	6984138	6985113	6984138	6984191	6988792	4	4	0	2	2	3	1.0,1.0	0.07,0.184	1	0.127	0.873	4.69437e-05	0.00884889	A5SS
Cyth2	ENSMUSG00000003269	-	chr7	45808372	45810122	45810238	45810126	45810238	45808449	6	0	8	8	7	4	0.192,1.0	0.0,0.0	0.596	0	0.596	4.66458e-05	0.00884889	A5SS
Gm8909	ENSMUSG00000073402	-	chr17	36165598	36167432	36167708	36167542	36167708	36165874	5	1	0	3	2.5	2	1.0,1.0	1.0,0.0	1	0.5	0.5	0.000134853	0.0177486	A5SS
Nrde2	ENSMUSG00000021179	-	chr12	100149816	100151210	100151334	100151225	100151334	100150050	15	17	10	1	12.5	9	0.294,0.714	1.0,0.893	0.504	0.9465	-0.443	0.000121187	0.0177486	A5SS
Trabd	ENSMUSG00000015363	+	chr15	89081950	89081352	89081453	89081352	89081431	89082117	5	0	6	11	5.5	5.5	0.607,0.317	0.0,0.0	0.462	0	0.462	0.000128334	0.0177486	A5SS
Oas1g	ENSMUSG00000066861	-	chr5	120879099	120881823	120882069	120881884	120882069	120879332	7	0	9	3	8	1.5	0.155,0.479	0.0,0.0	0.317	0	0.317	0.000147654	0.0177486	A5SS
Tyw5	ENSMUSG00000048495	-	chr1	57393349	57393584	57393694	57393669	57393694	57393487	1	4	2	1	1.5	2.5	0.319,0.0	1.0,0.319	0.1595	0.6595	-0.5	0.000153005	0.0177486	A5SS
Zswim8	ENSMUSG00000021819	+	chr14	20722142	20721170	20722053	20721170	20722029	20722319	4	0	2	4	3	2	0.694,0.431	0.0,0.0	0.5625	0	0.562	0.000176839	0.0190481	A5SS
Ankrd16	ENSMUSG00000047909	+	chr2	11784290	11783640	11783756	11783640	11783749	11784452	3	2	1	7	2	4.5	1.0,0.647	0.0,0.234	0.8235	0.117	0.707	0.000221878	0.0220758	A5SS
Tacc2	ENSMUSG00000030852	+	chr7	130739811	130734948	130735243	130734948	130735150	130739873	3	16	26	19	14.5	17.5	0.077,0.0	0.245,0.309	0.0385	0.277	-0.239	0.000234226	0.0220758	A5SS
Dip2c	ENSMUSG00000048264	+	chr13	9615744	9614346	9614468	9614346	9614456	9615825	1	6	11	4	6	5	0.126,0.0	0.683,0.301	0.063	0.492	-0.429	0.000288815	0.0256196	A5SS
Hectd4	ENSMUSG00000042744	+	chr5	121295374	121292729	121292858	121292729	121292852	121295499	5	3	1	5	3	4	1.0,0.787	0.0,0.481	0.8935	0.2405	0.653	0.000320764	0.0268729	A5SS
Cenpf	ENSMUSG00000026605	-	chr1	189678938	189680220	189680506	189680271	189680506	189679141	132	124	9	0	70.5	62	0.928,0.869	1.0,1.0	0.8985	1	-0.101	0.000345458	0.0274184	A5SS
Hnrnpc	ENSMUSG00000060373	-	chr14	52081259	52081788	52081903	52081827	52081903	52081307	275	293	766	500	520.5	396.5	0.204,0.178	0.294,0.262	0.191	0.278	-0.087	0.00058218	0.0438964	A5SS
Camk2d	ENSMUSG00000053819	+	chr3	126780359	126770784	126771846	126770784	126770857	126780462	2	14	2	1	2	7.5	0.066,0.066	1.0,0.33	0.066	0.665	-0.599	0.000679803	0.0488163	A5SS

[truncated: 4 more sheets: GFP_FL_A3SS, WT_DKO_sig, GFP_FL, ChiSquared Analysis]
