# Supplementary material
Source: HighWire-hosted journal article supplement (doi:10.1101/rna.079569.122)
Supplement: Supplemental_Table_S7.xlsx [file Supplemental_Table_S7.xlsx]

## Sheet: 1_safb_pre_impute
Majority protein IDs	Protein names	Gene names	Fasta headers	Razor + unique peptides	Potential contaminant	Log2 LFQ intensity 1 FL SAFB R1	Log2 LFQ intensity 2 FL SAFB R2	Log2 LFQ intensity 3 safb∆dd2 R1	Log2 LFQ intensity 4 safb∆dd2 R2	Log2 LFQ intensity 5 eGFP R1	Log2 LFQ intensity 6 eGFP R2	Peptides	Unique peptides	Sequence coverage [%]	Summed Log2 LFQ intensity	MS/MS count	MS/MS count 1	MS/MS count 2	MS/MS count 3	MS/MS count 4	MS/MS count 5	MS/MS count 6
E9PVX6		Mki67	Proliferation marker protein Ki-67 OS=Mus musculus OX=10090 GN=Mki67 PE=1 SV=1	3		NaN	NaN	18.2034	18.2293	NaN	18.2047	3	3	1.5	54.6375	0	0	0	0	0	0	0
O35381;Q64G17	Acidic leucine-rich nuclear phosphoprotein 32 family member A;Putative acidic leucine-rich nuclear phosphoprotein 32 family member C	Anp32a;Anp32c	Acidic leucine-rich nuclear phosphoprotein 32 family member A OS=Mus musculus OX=10090 GN=Anp32a PE=1 SV=1;Putative acidic leucine-rich nuclear phosphoprotein 32 family member C OS=Mus musculus OX=10090 GN=Anp32c PE=2 SV=3	2		NaN	NaN	20.3194	20.1668	19.0858	19.7397	2	2	9.7	79.3117	1	0	0	0	0	0	1
O88291	DBIRD complex subunit ZNF326	Znf326	DBIRD complex subunit ZNF326 OS=Mus musculus OX=10090 GN=Znf326 PE=1 SV=1	7		17.7907	18.0834	NaN	NaN	NaN	NaN	7	7	16.9	35.8741	0	0	0	0	0	0	0
O88532	Zinc finger RNA-binding protein	Zfr	Zinc finger RNA-binding protein OS=Mus musculus OX=10090 GN=Zfr PE=1 SV=2	12		NaN	NaN	15.5786	16.2185	16.2189	16.9874	12	12	17.1	65.0034	0	0	0	0	0	0	0
O89086	RNA-binding protein 3	Rbm3	RNA-binding protein 3 OS=Mus musculus OX=10090 GN=Rbm3 PE=1 SV=1	5		18.6381	18.5782	16.4964	16.1919	NaN	NaN	5	5	34.6	69.9046	0	0	0	0	0	0	0
P06151	L-lactate dehydrogenase A chain	Ldha	L-lactate dehydrogenase A chain OS=Mus musculus OX=10090 GN=Ldha PE=1 SV=3	2		NaN	NaN	18.9744	19.5772	19.2962	18.9431	2	2	7.2	76.7908	2	0	0	0	2	0	0
P11404	Fatty acid-binding protein, heart	Fabp3	Fatty acid-binding protein, heart OS=Mus musculus OX=10090 GN=Fabp3 PE=1 SV=5	2		22.5816	22.3689	NaN	NaN	NaN	NaN	2	2	18	44.9505	0	0	0	0	0	0	0
P14602	Heat shock protein beta-1	Hspb1	Heat shock protein beta-1 OS=Mus musculus OX=10090 GN=Hspb1 PE=1 SV=3	2		NaN	NaN	19.9438	19.747	20.8131	19.9973	2	2	12.4	80.5011	1	0	0	0	0	0	1
P17918	Proliferating cell nuclear antigen	Pcna	Proliferating cell nuclear antigen OS=Mus musculus OX=10090 GN=Pcna PE=1 SV=2	2		NaN	NaN	NaN	19.2179	20.4353	NaN	2	2	12.3	39.6533	1	0	0	0	1	0	0
P28659	CUGBP Elav-like family member 1	Celf1	CUGBP Elav-like family member 1 OS=Mus musculus OX=10090 GN=Celf1 PE=1 SV=2	2		NaN	16.8028	NaN	16.3604	NaN	NaN	2	2	6.2	33.1633	0	0	0	0	0	0	0
P60824	Cold-inducible RNA-binding protein	Cirbp	Cold-inducible RNA-binding protein OS=Mus musculus OX=10090 GN=Cirbp PE=1 SV=1	5		NaN	17.8487	NaN	NaN	NaN	NaN	5	5	38.4	17.8487	0	0	0	0	0	0	0
P61358	60S ribosomal protein L27	Rpl27	60S ribosomal protein L27 OS=Mus musculus OX=10090 GN=Rpl27 PE=1 SV=2	2		NaN	21.0119	20.249	20.2598	NaN	NaN	2	2	15.4	61.5207	4	0	1	1	1	1	0
P68254	14-3-3 protein theta	Ywhaq	14-3-3 protein theta OS=Mus musculus OX=10090 GN=Ywhaq PE=1 SV=1	2		NaN	NaN	19.5643	19.211	18.959	19.3973	3	2	14.7	77.1316	4	0	0	1	1	0	2
P70318	Nucleolysin TIAR	Tial1	Nucleolysin TIAR OS=Mus musculus OX=10090 GN=Tial1 PE=1 SV=1	2		NaN	NaN	NaN	17.26	16.7469	17.5407	2	2	7.4	51.5476	0	0	0	0	0	0	0
P70333	Heterogeneous nuclear ribonucleoprotein H2	Hnrnph2	Heterogeneous nuclear ribonucleoprotein H2 OS=Mus musculus OX=10090 GN=Hnrnph2 PE=1 SV=1	3		NaN	17.6128	NaN	NaN	NaN	NaN	8	3	24.7	17.6128	0	0	0	0	0	0	0
Q1HFZ0	tRNA (cytosine(34)-C(5))-methyltransferase	Nsun2	RNA cytosine C(5)-methyltransferase NSUN2 OS=Mus musculus OX=10090 GN=Nsun2 PE=1 SV=2	3		NaN	NaN	18.635	18.4449	18.6066	18.5101	3	3	5.8	74.1966	0	0	0	0	0	0	0
Q3UKJ7	WD40 repeat-containing protein SMU1;WD40 repeat-containing protein SMU1, N-terminally processed	Smu1	WD40 repeat-containing protein SMU1 OS=Mus musculus OX=10090 GN=Smu1 PE=2 SV=2	2		NaN	19.3735	18.8926	19.3977	NaN	NaN	2	2	6	57.6638	1	0	0	0	1	0	0
Q3V0C5	Ubiquitin carboxyl-terminal hydrolase 48	Usp48	Ubiquitin carboxyl-terminal hydrolase 48 OS=Mus musculus OX=10090 GN=Usp48 PE=1 SV=2	2		NaN	NaN	19.3925	19.8169	19.2457	19.6614	2	2	3	78.1166	3	0	0	1	1	0	1
Q5SVQ0	Histone acetyltransferase KAT7	Kat7	Histone acetyltransferase KAT7 OS=Mus musculus OX=10090 GN=Kat7 PE=1 SV=1	3		NaN	NaN	19.6723	19.9683	19.1685	19.3192	3	3	8	78.1284	6	0	0	2	3	0	1
Q61029;Q61033	Lamina-associated polypeptide 2, isoforms beta/delta/epsilon/gamma;Lamina-associated polypeptide 2, isoforms alpha/zeta	Tmpo	Lamina-associated polypeptide 2, isoforms beta/delta/epsilon/gamma OS=Mus musculus OX=10090 GN=Tmpo PE=1 SV=4;Lamina-associated polypeptide 2, isoforms alpha/zeta OS=Mus musculus OX=10090 GN=Tmpo PE=1 SV=4	4		NaN	NaN	18.0029	17.966	19.6023	20.827	4	4	11.5	76.3982	6	0	0	0	0	2	4
Q61687	Transcriptional regulator ATRX	Atrx	Transcriptional regulator ATRX OS=Mus musculus OX=10090 GN=Atrx PE=1 SV=3	5		NaN	NaN	20.2008	20.4005	18.6026	18.3545	5	5	2.9	77.5584	5	0	0	2	3	0	0
Q6A0A9	Constitutive coactivator of PPAR-gamma-like protein 1	FAM120A	Constitutive coactivator of PPAR-gamma-like protein 1 OS=Mus musculus OX=10090 GN=FAM120A PE=1 SV=2	9		NaN	15.6547	NaN	NaN	NaN	NaN	9	9	11.7	15.6547	0	0	0	0	0	0	0
Q6NV83	U2 snRNP-associated SURP motif-containing protein	U2surp	U2 snRNP-associated SURP motif-containing protein OS=Mus musculus OX=10090 GN=U2surp PE=1 SV=3	2		NaN	NaN	NaN	NaN	NaN	18.5636	2	2	2.5	18.5636	0	0	0	0	0	0	0
Q6NZF1	Zinc finger CCCH domain-containing protein 11A	Zc3h11a	Zinc finger CCCH domain-containing protein 11A OS=Mus musculus OX=10090 GN=Zc3h11a PE=1 SV=1	2		NaN	17.0007	NaN	NaN	NaN	NaN	2	2	4.3	17.0007	0	0	0	0	0	0	0
Q6P5D8	Structural maintenance of chromosomes flexible hinge domain-containing protein 1	Smchd1	Structural maintenance of chromosomes flexible hinge domain-containing protein 1 OS=Mus musculus OX=10090 GN=Smchd1 PE=1 SV=2	2		NaN	NaN	18.966	18.7319	19.7576	19.7966	2	2	1.5	77.2522	2	0	0	0	0	0	2
Q6PE01	U5 small nuclear ribonucleoprotein 40 kDa protein	Snrnp40	U5 small nuclear ribonucleoprotein 40 kDa protein OS=Mus musculus OX=10090 GN=Snrnp40 PE=1 SV=1	3		NaN	NaN	19.3595	18.8696	19.4101	18.7602	3	3	18.4	76.3994	0	0	0	0	0	0	0
Q6ZQ38	Cullin-associated NEDD8-dissociated protein 1	Cand1	Cullin-associated NEDD8-dissociated protein 1 OS=Mus musculus OX=10090 GN=Cand1 PE=1 SV=2	2		NaN	NaN	18.1216	17.9468	18.6123	17.7992	2	2	2.4	72.4799	0	0	0	0	0	0	0
Q8BG81	Polymerase delta-interacting protein 3	Poldip3	Polymerase delta-interacting protein 3 OS=Mus musculus OX=10090 GN=Poldip3 PE=1 SV=1	2		18.4935	18.7235	18.0504	18.1816	NaN	NaN	2	2	7.9	73.449	0	0	0	0	0	0	0
Q8BH74	Nuclear pore complex protein Nup107	Nup107	Nuclear pore complex protein Nup107 OS=Mus musculus OX=10090 GN=Nup107 PE=1 SV=1	3		NaN	NaN	NaN	18.1048	NaN	18.0715	3	3	5.3	36.1763	0	0	0	0	0	0	0
Q8C4J7	Transducin beta-like protein 3	Tbl3	Transducin beta-like protein 3 OS=Mus musculus OX=10090 GN=Tbl3 PE=2 SV=1	2		NaN	NaN	20.706	18.3922	NaN	17.2273	2	2	3.7	56.3255	1	0	0	1	0	0	0
Q8CFE4	SCY1-like protein 2	Scyl2	SCY1-like protein 2 OS=Mus musculus OX=10090 GN=Scyl2 PE=1 SV=1	3		20.2717	20.2326	19.663	19.8317	NaN	NaN	3	3	4.4	79.999	5	1	1	1	2	0	0
Q8K2M0	39S ribosomal protein L38, mitochondrial	Mrpl38	39S ribosomal protein L38, mitochondrial OS=Mus musculus OX=10090 GN=Mrpl38 PE=1 SV=2	5		NaN	NaN	NaN	14.9088	14.4303	NaN	5	5	25	29.3391	0	0	0	0	0	0	0
Q8K363	ATP-dependent RNA helicase DDX18	Ddx18	ATP-dependent RNA helicase DDX18 OS=Mus musculus OX=10090 GN=Ddx18 PE=1 SV=1	4		NaN	NaN	19.4816	19.0093	NaN	19.8507	4	4	7.9	58.3416	2	0	0	1	0	0	1
Q8K3Y3	Protein lin-28 homolog A	Lin28a	Protein lin-28 homolog A OS=Mus musculus OX=10090 GN=Lin28a PE=1 SV=1	3		18.6519	18.2149	18.4458	18.6119	NaN	NaN	3	3	23.9	73.9246	0	0	0	0	0	0	0
Q8R429;O55143	Sarcoplasmic/endoplasmic reticulum calcium ATPase 1;Sarcoplasmic/endoplasmic reticulum calcium ATPase 2	Atp2a1;Atp2a2	Sarcoplasmic/endoplasmic reticulum calcium ATPase 1 OS=Mus musculus OX=10090 GN=Atp2a1 PE=1 SV=1;Sarcoplasmic/endoplasmic reticulum calcium ATPase 2 OS=Mus musculus OX=10090 GN=Atp2a2 PE=1 SV=2	2		NaN	NaN	18.4754	18.6682	19.0137	18.5989	2	2	2.8	74.7562	0	0	0	0	0	0	0
Q8VDJ3	Vigilin	Hdlbp	Vigilin OS=Mus musculus OX=10090 GN=Hdlbp PE=1 SV=1	2		NaN	NaN	17.7677	NaN	NaN	18.1146	2	2	2.4	35.8822	0	0	0	0	0	0	0
Q8VHN8;Q6P3D0	Protein syndesmos;U8 snoRNA-decapping enzyme	Nudt16l1;Nudt16	Tudor-interacting repair regulator protein OS=Mus musculus OX=10090 GN=Nudt16l1 PE=1 SV=2;U8 snoRNA-decapping enzyme OS=Mus musculus OX=10090 GN=Nudt16 PE=1 SV=1	2		NaN	12.9776	14.7946	NaN	NaN	NaN	2	2	9.5	27.7723	0	0	0	0	0	0	0
Q91VI7	Ribonuclease inhibitor	Rnh1	Ribonuclease inhibitor OS=Mus musculus OX=10090 GN=Rnh1 PE=1 SV=1	2		NaN	NaN	19.888	19.1267	NaN	19.1075	2	2	6.6	58.1223	3	0	0	2	1	0	0
Q91VJ4	Serine/threonine-protein kinase 38	Stk38	Serine/threonine-protein kinase 38 OS=Mus musculus OX=10090 GN=Stk38 PE=1 SV=1	4		21.6208	21.3937	20.6744	20.5122	NaN	NaN	4	4	12.3	84.201	7	1	2	2	2	0	0
Q91WM1	Spermatid perinuclear RNA-binding protein	Strbp	Spermatid perinuclear RNA-binding protein OS=Mus musculus OX=10090 GN=Strbp PE=1 SV=1	4		17.1541	15.8533	NaN	NaN	NaN	NaN	8	4	11.9	33.0074	0	0	0	0	0	0	0
Q924C1	Exportin-5	Xpo5	Exportin-5 OS=Mus musculus OX=10090 GN=Xpo5 PE=1 SV=1	2		NaN	NaN	18.8328	NaN	NaN	19.4887	2	2	2.9	38.3214	0	0	0	0	0	0	0
Q99N87	28S ribosomal protein S5, mitochondrial	Mrps5	28S ribosomal protein S5, mitochondrial OS=Mus musculus OX=10090 GN=Mrps5 PE=1 SV=1	4		NaN	17.5212	16.3145	16.4779	NaN	NaN	4	4	11.3	50.3137	0	0	0	0	0	0	0
Q99N89	39S ribosomal protein L43, mitochondrial	Mrpl43	39S ribosomal protein L43, mitochondrial OS=Mus musculus OX=10090 GN=Mrpl43 PE=1 SV=1	5		NaN	16.5311	16.8579	16.616	NaN	NaN	5	5	29	50.005	0	0	0	0	0	0	0
Q9CPX7	28S ribosomal protein S16, mitochondrial	Mrps16	28S ribosomal protein S16, mitochondrial OS=Mus musculus OX=10090 GN=Mrps16 PE=1 SV=1	2		NaN	NaN	NaN	17.6282	18.9316	NaN	2	2	19.3	36.5598	0	0	0	0	0	0	0
Q9CR59	Growth arrest and DNA damage-inducible proteins-interacting protein 1	Gadd45gip1	Growth arrest and DNA damage-inducible proteins-interacting protein 1 OS=Mus musculus OX=10090 GN=Gadd45gip1 PE=1 SV=1	2		NaN	NaN	NaN	NaN	NaN	14.8812	2	2	8.6	14.8812	0	0	0	0	0	0	0
Q9D0B0	Serine/arginine-rich splicing factor 9	Srsf9	Serine/arginine-rich splicing factor 9 OS=Mus musculus OX=10090 GN=Srsf9 PE=1 SV=1	2		20.6973	20.9613	NaN	NaN	NaN	NaN	2	2	9	41.6585	1	1	0	0	0	0	0
Q9D0F6	Replication factor C subunit 5	Rfc5	Replication factor C subunit 5 OS=Mus musculus OX=10090 GN=Rfc5 PE=1 SV=1	2		NaN	NaN	NaN	19.4316	19.4348	19.5236	2	2	11.2	58.39	0	0	0	0	0	0	0
Q9D1B9	39S ribosomal protein L28, mitochondrial	Mrpl28	39S ribosomal protein L28, mitochondrial OS=Mus musculus OX=10090 GN=Mrpl28 PE=1 SV=3	4		NaN	16.7689	NaN	NaN	NaN	NaN	4	4	20.2	16.7689	0	0	0	0	0	0	0
Q9D1N9	39S ribosomal protein L21, mitochondrial	Mrpl21	39S ribosomal protein L21, mitochondrial OS=Mus musculus OX=10090 GN=Mrpl21 PE=1 SV=1	6		17.1279	17.3533	17.4117	17.2853	NaN	NaN	6	6	31.1	69.1781	0	0	0	0	0	0	0
Q9D1P0	39S ribosomal protein L13, mitochondrial	Mrpl13	39S ribosomal protein L13, mitochondrial OS=Mus musculus OX=10090 GN=Mrpl13 PE=1 SV=1	3		NaN	15.6451	NaN	NaN	NaN	NaN	3	3	24.2	15.6451	0	0	0	0	0	0	0
Q9D338	39S ribosomal protein L19, mitochondrial	Mrpl19	39S ribosomal protein L19, mitochondrial OS=Mus musculus OX=10090 GN=Mrpl19 PE=1 SV=1	4		NaN	16.9971	17.1191	NaN	NaN	NaN	4	4	15.1	34.1162	0	0	0	0	0	0	0
Q9D7N3	28S ribosomal protein S9, mitochondrial	Mrps9	28S ribosomal protein S9, mitochondrial OS=Mus musculus OX=10090 GN=Mrps9 PE=1 SV=3	7		14.5465	15.309	15.2023	NaN	NaN	NaN	7	7	24.9	45.0578	0	0	0	0	0	0	0
Q9DC71	28S ribosomal protein S15, mitochondrial	Mrps15	28S ribosomal protein S15, mitochondrial OS=Mus musculus OX=10090 GN=Mrps15 PE=1 SV=2	2		NaN	NaN	NaN	NaN	NaN	17.0187	2	2	8.1	17.0187	0	0	0	0	0	0	0
Q9EPU4	Cleavage and polyadenylation specificity factor subunit 1	Cpsf1	Cleavage and polyadenylation specificity factor subunit 1 OS=Mus musculus OX=10090 GN=Cpsf1 PE=1 SV=1	2		NaN	NaN	NaN	NaN	17.3934	17.4294	2	2	1.9	34.8228	0	0	0	0	0	0	0
Q9ERK4	Exportin-2	Cse1l	Exportin-2 OS=Mus musculus OX=10090 GN=Cse1l PE=1 SV=1	2		NaN	NaN	16.6998	17.1209	16.7539	17.0269	2	2	3.2	67.6016	0	0	0	0	0	0	0
Q9ERU9	E3 SUMO-protein ligase RanBP2	Ranbp2	E3 SUMO-protein ligase RanBP2 OS=Mus musculus OX=10090 GN=Ranbp2 PE=1 SV=2	2		NaN	NaN	17.3552	17.1319	18.1328	19.0028	2	2	0.9	71.6227	2	0	0	0	0	0	2
Q9JIX8	Apoptotic chromatin condensation inducer in the nucleus	Acin1	Apoptotic chromatin condensation inducer in the nucleus OS=Mus musculus OX=10090 GN=Acin1 PE=1 SV=3	2		NaN	20.712	NaN	NaN	NaN	NaN	2	2	2.1	20.712	1	0	1	0	0	0	0
Q9JKF7	39S ribosomal protein L39, mitochondrial	Mrpl39	39S ribosomal protein L39, mitochondrial OS=Mus musculus OX=10090 GN=Mrpl39 PE=1 SV=4	4		NaN	NaN	NaN	NaN	NaN	17.9972	4	4	14.6	17.9972	0	0	0	0	0	0	0
D3YXK2	Scaffold attachment factor B1	Safb	Scaffold attachment factor B1 OS=Mus musculus OX=10090 GN=Safb PE=1 SV=2	23		23.4737	23.1114	29.4492	29.1722	15.4378	NaN	23	23	21.9	120.644	126	7	7	54	58	0	0
Q91VM5;Q9WV02	RNA binding motif protein, X-linked-like-1;RNA-binding motif protein, X chromosome;RNA-binding motif protein, X chromosome, N-terminally processed	Rbmxl1;Rbmx	RNA binding motif protein, X-linked-like-1 OS=Mus musculus OX=10090 GN=Rbmxl1 PE=2 SV=1;RNA-binding motif protein, X chromosome OS=Mus musculus OX=10090 GN=Rbmx PE=1 SV=1	14		24.654	24.9154	20.2757	21.0599	19.3308	20.5667	14	14	36.6	130.803	16	5	4	2	3	0	2
P84104	Serine/arginine-rich splicing factor 3	Srsf3	Serine/arginine-rich splicing factor 3 OS=Mus musculus OX=10090 GN=Srsf3 PE=1 SV=1	5		23.5921	23.5382	19.875	20.3471	19.769	17.8083	5	4	31.7	124.93	6	2	3	0	1	0	0
Q9R0U0	Serine/arginine-rich splicing factor 10	Srsf10	Serine/arginine-rich splicing factor 10 OS=Mus musculus OX=10090 GN=Srsf10 PE=1 SV=2	6		22.2241	22.1295	18.5866	18.5759	17.456	18.2713	6	6	23.7	117.243	6	3	3	0	0	0	0
Q8CIG8	Protein arginine N-methyltransferase 5	Prmt5	Protein arginine N-methyltransferase 5 OS=Mus musculus OX=10090 GN=Prmt5 PE=1 SV=3	15		24.2252	24.0584	23.3112	22.8679	19.6735	21.2493	15	15	28.7	135.386	33	7	9	6	9	0	2
P62996	Transformer-2 protein homolog beta	Tra2b	Transformer-2 protein homolog beta OS=Mus musculus OX=10090 GN=Tra2b PE=1 SV=1	4		23.4978	23.654	20.187	20.5663	20.429	19.8862	4	4	17.4	128.22	13	3	5	1	2	1	1
Q64012	RNA-binding protein Raly	Raly	RNA-binding protein Raly OS=Mus musculus OX=10090 GN=Raly PE=1 SV=3	13		18.4562	20.2527	17.2138	17.285	15.4286	16.6239	13	13	40.1	105.26	2	0	2	0	0	0	0
Q99J09	Methylosome protein 50	Wdr77	Methylosome protein 50 OS=Mus musculus OX=10090 GN=Wdr77 PE=1 SV=1	5		24.5422	24.316	23.5496	23.0613	21.5943	21.2717	5	5	24.3	138.335	15	4	3	4	4	0	0
P36993	Protein phosphatase 1B	Ppm1b	Protein phosphatase 1B OS=Mus musculus OX=10090 GN=Ppm1b PE=1 SV=1	7		21.8907	22.1101	21.6027	21.1994	18.6969	19.6954	7	7	27.9	125.195	9	1	2	2	3	0	1
Q9Z1D1	Eukaryotic translation initiation factor 3 subunit G	Eif3g	Eukaryotic translation initiation factor 3 subunit G OS=Mus musculus OX=10090 GN=Eif3g PE=1 SV=2	4		NaN	21.835	21.3287	20.7743	17.7539	20.4778	4	4	16.9	102.17	5	0	2	1	1	0	1
Q3TWW8	Serine/arginine-rich splicing factor 6	Srsf6	Serine/arginine-rich splicing factor 6 OS=Mus musculus OX=10090 GN=Srsf6 PE=1 SV=1	4		22.8115	22.5412	20.441	20.2213	20.4724	19.6301	4	3	13.6	126.118	5	2	2	1	0	0	0
Q9EP97	Sentrin-specific protease 3	Senp3	Sentrin-specific protease 3 OS=Mus musculus OX=10090 GN=Senp3 PE=1 SV=1	2		26.4022	26.1921	25.0972	NaN	21.5296	25.9326	2	2	4.6	125.154	1	0	0	1	0	0	0
Q8BL97	Serine/arginine-rich splicing factor 7	Srsf7	Serine/arginine-rich splicing factor 7 OS=Mus musculus OX=10090 GN=Srsf7 PE=1 SV=1	4		22.488	22.9706	20.4184	20.6669	20.1895	20.271	5	4	17.2	127.005	4	0	2	1	1	0	0
P62751	60S ribosomal protein L23a	Rpl23a	60S ribosomal protein L23a OS=Mus musculus OX=10090 GN=Rpl23a PE=1 SV=1	3		21.6013	21.7293	21.2935	22.0199	19.5965	18.9474	3	3	25	125.188	8	1	2	2	3	0	0
O35326	Serine/arginine-rich splicing factor 5	Srsf5	Serine/arginine-rich splicing factor 5 OS=Mus musculus OX=10090 GN=Srsf5 PE=1 SV=2	4		21.2248	21.2144	18.5833	18.8188	NaN	18.8368	4	4	19.3	98.6779	5	2	3	0	0	0	0
Q6PDM2	Serine/arginine-rich splicing factor 1	Srsf1	Serine/arginine-rich splicing factor 1 OS=Mus musculus OX=10090 GN=Srsf1 PE=1 SV=3	5		20.6738	21.1783	18.4305	18.1041	NaN	18.661	5	5	24.2	97.0478	3	1	2	0	0	0	0
Q62093	Serine/arginine-rich splicing factor 2	Srsf2	Serine/arginine-rich splicing factor 2 OS=Mus musculus OX=10090 GN=Srsf2 PE=1 SV=4	3		21.8562	21.1536	20.6739	19.9553	19.6227	19.337	3	3	18.6	122.599	4	1	1	1	1	0	0
P47911	60S ribosomal protein L6	Rpl6	60S ribosomal protein L6 OS=Mus musculus OX=10090 GN=Rpl6 PE=1 SV=3	8		22.2017	21.8279	21.5984	21.8634	19.6185	20.4954	8	8	26.7	127.605	16	2	4	3	6	0	1
A2AKX3	Probable helicase senataxin	Setx	Probable helicase senataxin OS=Mus musculus OX=10090 GN=Setx PE=1 SV=1	4		19.0971	20.3352	18.6692	18.8039	17.4472	18.1231	4	4	1.9	112.476	6	0	4	0	2	0	0
Q60749	KH domain-containing, RNA-binding, signal transduction-associated protein 1	Khdrbs1	KH domain-containing, RNA-binding, signal transduction-associated protein 1 OS=Mus musculus OX=10090 GN=Khdrbs1 PE=1 SV=2	4		20.783	20.7184	19.1453	19.3797	18.8468	18.8189	4	4	19	117.692	3	1	1	0	1	0	0
Q8VC52	RNA-binding protein with multiple splicing 2	Rbpms2	RNA-binding protein with multiple splicing 2 OS=Mus musculus OX=10090 GN=Rbpms2 PE=1 SV=1	6		NaN	18.888	17.1322	16.6096	NaN	17.0145	6	4	35.9	69.6444	0	0	0	0	0	0	0
Q9Z204	Heterogeneous nuclear ribonucleoproteins C1/C2	Hnrnpc	Heterogeneous nuclear ribonucleoproteins C1/C2 OS=Mus musculus OX=10090 GN=Hnrnpc PE=1 SV=1	18		23.2845	23.4117	21.7191	21.7073	21.4992	21.4941	18	18	50.8	133.116	19	3	6	5	3	1	1
O88569	Heterogeneous nuclear ribonucleoproteins A2/B1	Hnrnpa2b1	Heterogeneous nuclear ribonucleoproteins A2/B1 OS=Mus musculus OX=10090 GN=Hnrnpa2b1 PE=1 SV=2	20		22.3596	22.3001	20.168	20.9346	20.4307	20.5313	20	19	61.5	126.724	13	3	2	0	4	2	2
Q9D883	Splicing factor U2AF 35 kDa subunit	U2af1	Splicing factor U2AF 35 kDa subunit OS=Mus musculus OX=10090 GN=U2af1 PE=1 SV=4	3		22.6848	21.5138	20.6866	20.9806	20.2733	20.2951	3	3	18	126.434	8	2	1	1	2	1	1
Q8BGD9	Eukaryotic translation initiation factor 4B	Eif4b	Eukaryotic translation initiation factor 4B OS=Mus musculus OX=10090 GN=Eif4b PE=1 SV=1	2		21.0907	20.9631	18.3926	20.2808	NaN	19.2251	2	2	4.9	99.9523	3	1	1	0	1	0	0
Q8VIG1	RE1-silencing transcription factor	Rest	RE1-silencing transcription factor OS=Mus musculus OX=10090 GN=Rest PE=1 SV=2	5		20.0482	20.4576	20.2153	19.9094	17.7936	19.1479	5	5	6.4	117.572	5	0	2	2	1	0	0
P49312	Heterogeneous nuclear ribonucleoprotein A1;Heterogeneous nuclear ribonucleoprotein A1, N-terminally processed	Hnrnpa1	Heterogeneous nuclear ribonucleoprotein A1 OS=Mus musculus OX=10090 GN=Hnrnpa1 PE=1 SV=2	15		23.7909	24.104	22.0677	22.5738	22.1939	22.2812	16	14	58.1	137.011	26	4	4	4	7	2	5
CON__P04264				27	+	25.1133	23.8885	22.7178	25.6707	22.0644	23.5507	27	18	41.1	143.005	67	12	6	5	32	3	9
Q501J6	Probable ATP-dependent RNA helicase DDX17	Ddx17	Probable ATP-dependent RNA helicase DDX17 OS=Mus musculus OX=10090 GN=Ddx17 PE=1 SV=1	13		20.7228	20.6866	18.9504	19.4854	19.2076	18.8584	17	13	31.4	117.911	7	2	2	0	3	0	0
CON__P13645				22	+	28.0802	27.2266	25.4543	28.8431	24.9955	26.9895	22	19	41	161.589	71	12	10	4	34	2	9
Q8BG05	Heterogeneous nuclear ribonucleoprotein A3	Hnrnpa3	Heterogeneous nuclear ribonucleoprotein A3 OS=Mus musculus OX=10090 GN=Hnrnpa3 PE=1 SV=1	14		22.9996	23.2425	21.4656	21.7177	21.3088	21.6244	15	14	34.3	132.359	27	4	5	5	5	3	5
Q7TMK9	Heterogeneous nuclear ribonucleoprotein Q	Syncrip	Heterogeneous nuclear ribonucleoprotein Q OS=Mus musculus OX=10090 GN=Syncrip PE=1 SV=2	21		20.8171	21.1194	20.165	20.5994	19.401	19.2578	21	21	40.4	121.36	8	1	3	1	3	0	0
Q61656	Probable ATP-dependent RNA helicase DDX5	Ddx5	Probable ATP-dependent RNA helicase DDX5 OS=Mus musculus OX=10090 GN=Ddx5 PE=1 SV=2	27		23.4593	23.6992	21.8231	21.8804	21.8838	22.0178	27	23	46.1	134.764	39	8	8	4	10	3	6
CON__P13647;CON__P48668;CON__P04259;CON__P02538			;;;	4	+	19.3957	19.8387	18.157	20.0664	18.316	17.6697	8	3	12.5	113.444	4	0	1	0	3	0	0
Q91WJ8	Far upstream element-binding protein 1	Fubp1	Far upstream element-binding protein 1 OS=Mus musculus OX=10090 GN=Fubp1 PE=1 SV=1	12		20.105	20.1639	17.8729	16.758	18.7736	18.2612	13	12	29.3	111.935	1	0	1	0	0	0	0
Q8R081	Heterogeneous nuclear ribonucleoprotein L	Hnrnpl	Heterogeneous nuclear ribonucleoprotein L OS=Mus musculus OX=10090 GN=Hnrnpl PE=1 SV=2	18		21.8693	22.6851	20.8061	20.5884	20.4429	20.9381	18	18	38.1	127.33	9	1	3	2	1	0	2
P61979	Heterogeneous nuclear ribonucleoprotein K	Hnrnpk	Heterogeneous nuclear ribonucleoprotein K OS=Mus musculus OX=10090 GN=Hnrnpk PE=1 SV=1	25		23.3403	23.4558	22.2063	22.128	21.8077	21.9088	25	25	52.5	134.847	22	4	7	3	3	3	2
CON__P35908v2;CON__P35908			;	22	+	23.9798	21.8725	20.8478	24.3589	20.4804	22.3212	25	18	59.8	133.861	40	9	4	3	20	1	3
P14148	60S ribosomal protein L7	Rpl7	60S ribosomal protein L7 OS=Mus musculus OX=10090 GN=Rpl7 PE=1 SV=2	7		22.4662	22.3595	22.4652	22.8741	20.7497	21.1207	7	7	21.9	132.035	7	1	1	1	2	1	1
P43274	Histone H1.4	Hist1h1e	Histone H1.4 OS=Mus musculus OX=10090 GN=H1-4 PE=1 SV=2	2		NaN	20.3628	20.6423	21.5466	18.9127	NaN	5	2	25.1	81.4644	1	0	0	0	1	0	0
P26443	Glutamate dehydrogenase 1, mitochondrial	Glud1	Glutamate dehydrogenase 1, mitochondrial OS=Mus musculus OX=10090 GN=Glud1 PE=1 SV=1	4		20.0257	21.0184	19.3093	18.9286	19.0304	19.2408	4	4	10	117.553	5	0	3	1	1	0	0
P84089	Enhancer of rudimentary homolog	Erh	Enhancer of rudimentary homolog OS=Mus musculus OX=10090 GN=Erh PE=1 SV=1	2		23.1152	23.0142	24.4959	24.2777	22.1965	21.1604	2	2	21.2	138.26	7	1	1	2	2	1	0
Q8VC57	BTB/POZ domain-containing protein KCTD5	Kctd5	BTB/POZ domain-containing protein KCTD5 OS=Mus musculus OX=10090 GN=Kctd5 PE=1 SV=1	3		22.1522	23.9359	21.7078	23.0387	21.3486	21.999	3	3	20.9	134.182	10	1	5	0	3	0	1
Q8CH25	SAFB-like transcription modulator	Sltm	SAFB-like transcription modulator OS=Mus musculus OX=10090 GN=Sltm PE=1 SV=1	4		21.3308	21.4314	19.8289	17.819	20.2024	19.8585	4	4	4.1	120.471	3	1	2	0	0	0	0
O35737	Heterogeneous nuclear ribonucleoprotein H;Heterogeneous nuclear ribonucleoprotein H, N-terminally processed	Hnrnph1	Heterogeneous nuclear ribonucleoprotein H OS=Mus musculus OX=10090 GN=Hnrnph1 PE=1 SV=3	15		22.2802	22.4397	21.2625	21.1497	21.3523	20.7222	15	9	46.1	129.207	27	5	9	5	4	2	2
CON__P35527				21	+	23.6902	22.2583	21.7341	24.5218	21.041	22.2822	22	21	51.7	135.527	63	13	5	6	28	3	8
Q9CXY6	Interleukin enhancer-binding factor 2	Ilf2	Interleukin enhancer-binding factor 2 OS=Mus musculus OX=10090 GN=Ilf2 PE=1 SV=1	15		19.1681	19.1413	18.9355	18.4357	17.0442	18.6468	15	15	51.5	111.372	0	0	0	0	0	0	0
Q9CR57	60S ribosomal protein L14	Rpl14	60S ribosomal protein L14 OS=Mus musculus OX=10090 GN=Rpl14 PE=1 SV=3	3		21.0861	22.0181	20.9654	21.263	19.9399	20.6665	3	3	17.1	125.939	10	2	1	2	4	0	1
Q8JZQ9	Eukaryotic translation initiation factor 3 subunit B	Eif3b	Eukaryotic translation initiation factor 3 subunit B OS=Mus musculus OX=10090 GN=Eif3b PE=1 SV=1	5		20.6436	20.5977	19.6602	19.1543	19.275	19.4992	5	5	10.2	118.83	2	1	1	0	0	0	0
Q9D8E6	60S ribosomal protein L4	Rpl4	60S ribosomal protein L4 OS=Mus musculus OX=10090 GN=Rpl4 PE=1 SV=3	9		22.9994	23.1045	22.8202	22.8941	21.9326	21.7349	9	9	23.9	135.486	16	2	3	2	6	1	2
Q99020	Heterogeneous nuclear ribonucleoprotein A/B	Hnrnpab	Heterogeneous nuclear ribonucleoprotein A/B OS=Mus musculus OX=10090 GN=Hnrnpab PE=1 SV=1	9		22.5678	22.7254	21.5031	21.6102	21.534	21.3384	9	9	27	131.279	18	2	4	3	5	2	2
P62717	60S ribosomal protein L18a	Rpl18a	60S ribosomal protein L18a OS=Mus musculus OX=10090 GN=Rpl18a PE=1 SV=1	2		20.5303	21.7808	20.1407	19.9559	19.9479	NaN	2	2	10.2	102.356	2	0	1	0	0	1	0
O08583	THO complex subunit 4	Alyref	THO complex subunit 4 OS=Mus musculus OX=10090 GN=Alyref PE=1 SV=3	5		21.6493	21.5039	21.2027	21.6939	20.4116	20.3457	5	5	27.5	126.807	12	1	3	2	5	0	1
Q9DBR0	A-kinase anchor protein 8	Akap8	A-kinase anchor protein 8 OS=Mus musculus OX=10090 GN=Akap8 PE=1 SV=1	5		17.8605	NaN	17.5996	17.8599	NaN	16.665	5	5	11.1	69.985	0	0	0	0	0	0	0
P01631	Ig kappa chain V-II region 26-10		Ig kappa chain V-II region 26-10 OS=Mus musculus OX=10090 PE=1 SV=1	3		27.146	27.2764	27.3597	26.3703	25.9371	26.1028	3	3	17.7	160.192	13	3	2	2	4	1	1
Q9Z130	Heterogeneous nuclear ribonucleoprotein D-like	Hnrnpdl	Heterogeneous nuclear ribonucleoprotein D-like OS=Mus musculus OX=10090 GN=Hnrnpdl PE=1 SV=1	10		18.733	20.1366	17.6916	17.8855	18.8081	17.727	10	9	27.6	110.982	1	0	1	0	0	0	0
P53026	60S ribosomal protein L10a	Rpl10a	60S ribosomal protein L10a OS=Mus musculus OX=10090 GN=Rpl10a PE=1 SV=3	5		22.2116	21.6488	22.0354	21.6634	20.1888	21.3699	5	5	22.6	129.118	5	0	0	2	1	0	2
P35980	60S ribosomal protein L18	Rpl18	60S ribosomal protein L18 OS=Mus musculus OX=10090 GN=Rpl18 PE=1 SV=3	5		22.4195	22.7072	22.2048	22.3563	21.5031	21.3312	5	5	29.8	132.522	15	2	3	2	3	2	3
P12970	60S ribosomal protein L7a	Rpl7a	60S ribosomal protein L7a OS=Mus musculus OX=10090 GN=Rpl7a PE=1 SV=2	8		22.1445	22.3052	22.1404	22.2467	21.0274	21.2088	8	8	26.3	131.073	10	0	1	2	5	1	1
P83882	60S ribosomal protein L36a	Rpl36a	60S ribosomal protein L36a OS=Mus musculus OX=10090 GN=Rpl36a PE=3 SV=2	2		20.5195	20.3903	20.5014	20.4588	19.7639	18.9523	2	2	15.1	120.586	0	0	0	0	0	0	0
P62918	60S ribosomal protein L8	Rpl8	60S ribosomal protein L8 OS=Mus musculus OX=10090 GN=Rpl8 PE=1 SV=2	2		22.1297	22.037	21.8859	22.0976	20.9905	20.9849	2	2	10.5	130.126	10	1	1	2	3	2	1
P62320	Small nuclear ribonucleoprotein Sm D3	Snrpd3	Small nuclear ribonucleoprotein Sm D3 OS=Mus musculus OX=10090 GN=Snrpd3 PE=1 SV=1	2		21.2464	21.4805	20.611	20.211	20.2104	20.3296	2	2	13.5	124.089	5	1	1	1	1	0	1
P70372	ELAV-like protein 1	Elavl1	ELAV-like protein 1 OS=Mus musculus OX=10090 GN=Elavl1 PE=1 SV=2	10		20.0307	20.7889	18.6766	19.2659	18.8072	19.8341	10	10	41.1	117.403	5	1	2	0	1	0	1
Q6PB66	Leucine-rich PPR motif-containing protein, mitochondrial	Lrpprc	Leucine-rich PPR motif-containing protein, mitochondrial OS=Mus musculus OX=10090 GN=Lrpprc PE=1 SV=2	20		16.7564	17.6995	16.9052	16.7523	NaN	16.1453	20	20	19.2	84.2587	0	0	0	0	0	0	0
P62754	40S ribosomal protein S6	Rps6	40S ribosomal protein S6 OS=Mus musculus OX=10090 GN=Rps6 PE=1 SV=1	3		22.1485	22.2346	22.9265	22.7319	21.2854	20.9645	3	3	14.1	132.291	10	1	2	3	3	1	0
Q9Z1X4	Interleukin enhancer-binding factor 3	Ilf3	Interleukin enhancer-binding factor 3 OS=Mus musculus OX=10090 GN=Ilf3 PE=1 SV=2	22		19.3477	19.7252	18.4321	18.959	18.5622	18.3916	22	18	30.3	113.418	3	0	1	1	1	0	0
P62301	40S ribosomal protein S13	Rps13	40S ribosomal protein S13 OS=Mus musculus OX=10090 GN=Rps13 PE=1 SV=2	4		21.0532	21.7063	21.4313	21.0761	20.3809	20.3416	4	4	25.2	125.989	8	0	2	3	2	1	0
Q99JX7	Nuclear RNA export factor 1	Nxf1	Nuclear RNA export factor 1 OS=Mus musculus OX=10090 GN=Nxf1 PE=1 SV=3	7		19.8966	19.9869	19.0866	19.1654	18.9195	18.9415	7	7	18.1	115.996	3	1	2	0	0	0	0
Q569Z6	Thyroid hormone receptor-associated protein 3	Thrap3	Thyroid hormone receptor-associated protein 3 OS=Mus musculus OX=10090 GN=Thrap3 PE=1 SV=1	8		21.1968	20.9075	21.4177	21.4482	20.1297	20.0029	8	8	10.3	125.103	14	1	0	6	6	0	1
Q62376	U1 small nuclear ribonucleoprotein 70 kDa	Snrnp70	U1 small nuclear ribonucleoprotein 70 kDa OS=Mus musculus OX=10090 GN=Snrnp70 PE=1 SV=2	10		22.9452	23.2512	22.0973	22.1362	22.1086	22.1234	10	10	27	134.662	16	2	3	3	2	3	3
P26369	Splicing factor U2AF 65 kDa subunit	U2af2	Splicing factor U2AF 65 kDa subunit OS=Mus musculus OX=10090 GN=U2af2 PE=1 SV=3	6		21.0166	20.7124	19.6696	19.759	19.8302	19.9409	6	6	26.5	120.929	3	1	0	0	1	0	1
Q99LE6	ATP-binding cassette sub-family F member 2	Abcf2	ATP-binding cassette sub-family F member 2 OS=Mus musculus OX=10090 GN=Abcf2 PE=1 SV=1	4		20.8095	20.7117	20.2873	20.1732	19.4771	20.1357	4	4	7.8	121.594	7	2	1	1	1	1	1
Q6ZWV7	60S ribosomal protein L35	Rpl35	60S ribosomal protein L35 OS=Mus musculus OX=10090 GN=Rpl35 PE=1 SV=1	2		21.5546	21.4172	21.0928	21.3572	20.6232	20.4659	2	2	18.7	126.511	2	0	0	0	2	0	0
Q9CX86	Heterogeneous nuclear ribonucleoprotein A0	Hnrnpa0	Heterogeneous nuclear ribonucleoprotein A0 OS=Mus musculus OX=10090 GN=Hnrnpa0 PE=1 SV=1	5		22.0095	22.2245	21.3385	21.005	21.0387	21.315	5	5	21.6	128.931	10	1	2	1	3	0	3
O70133	ATP-dependent RNA helicase A	Dhx9	ATP-dependent RNA helicase A OS=Mus musculus OX=10090 GN=Dhx9 PE=1 SV=2	41		21.2676	21.7021	20.784	20.8293	20.4392	20.6613	41	41	37.2	125.683	18	2	4	2	8	2	0
Q3U0V1	Far upstream element-binding protein 2	Khsrp	Far upstream element-binding protein 2 OS=Mus musculus OX=10090 GN=Khsrp PE=1 SV=2	16		18.8025	18.5132	16.3606	16.9179	17.1573	18.3046	16	15	29.9	106.056	0	0	0	0	0	0	0
Q8VEK3	Heterogeneous nuclear ribonucleoprotein U	Hnrnpu	Heterogeneous nuclear ribonucleoprotein U OS=Mus musculus OX=10090 GN=Hnrnpu PE=1 SV=1	27		21.9043	22.1777	21.4528	21.6463	21.1233	21.1264	27	27	31	129.431	16	3	4	2	5	0	2
Q62167;P16381	ATP-dependent RNA helicase DDX3X;Putative ATP-dependent RNA helicase Pl10	Ddx3x;D1Pas1	ATP-dependent RNA helicase DDX3X OS=Mus musculus OX=10090 GN=Ddx3x PE=1 SV=3;Putative ATP-dependent RNA helicase Pl10 OS=Mus musculus OX=10090 GN=D1Pas1 PE=1 SV=1	13		22.1193	22.3519	21.3681	21.2166	21.295	21.3521	14	3	28.9	129.703	32	4	7	7	5	4	5
Q9D8N0	Elongation factor 1-gamma	Eef1g	Elongation factor 1-gamma OS=Mus musculus OX=10090 GN=Eef1g PE=1 SV=3	4		NaN	20.6647	18.3981	18.394	20.4135	19.1052	4	4	11.4	96.9755	4	0	3	0	0	1	0
P62242	40S ribosomal protein S8	Rps8	40S ribosomal protein S8 OS=Mus musculus OX=10090 GN=Rps8 PE=1 SV=2	6		22.091	22.2393	22.4469	22.5049	21.2828	21.3272	6	6	34.6	131.892	17	2	2	4	4	2	3
P23116	Eukaryotic translation initiation factor 3 subunit A	Eif3a	Eukaryotic translation initiation factor 3 subunit A OS=Mus musculus OX=10090 GN=Eif3a PE=1 SV=5	6		20.9836	21.0958	19.7913	19.836	20.3358	20.0566	6	6	5.8	122.099	9	1	3	1	2	2	0
Q5SUF2	Luc7-like protein 3	Luc7l3	Luc7-like protein 3 OS=Mus musculus OX=10090 GN=Luc7l3 PE=1 SV=1	2		18.9702	19.247	18.1068	18.0881	18.3575	18.1808	2	2	6.7	110.95	1	0	1	0	0	0	0
P97302	Transcription regulator protein BACH1	Bach1	Transcription regulator protein BACH1 OS=Mus musculus OX=10090 GN=Bach1 PE=1 SV=1	2		27.3226	26.6123	26.8495	22.6534	26.1154	26.155	2	2	2.8	155.708	0	0	0	0	0	0	0
Q9QZD9	Eukaryotic translation initiation factor 3 subunit I	Eif3i	Eukaryotic translation initiation factor 3 subunit I OS=Mus musculus OX=10090 GN=Eif3i PE=1 SV=1	3		20.1519	19.8736	19.1591	19.4828	19.1258	19.2457	3	3	17.5	117.039	4	1	1	0	2	0	0
Q9CZM2	60S ribosomal protein L15	Rpl15	60S ribosomal protein L15 OS=Mus musculus OX=10090 GN=Rpl15 PE=1 SV=4	5		21.4596	21.7126	21.5707	21.8343	20.4755	21.051	5	5	24	128.104	9	1	1	2	3	1	1
P62960	Nuclease-sensitive element-binding protein 1	Ybx1	Y-box-binding protein 1 OS=Mus musculus OX=10090 GN=Ybx1 PE=1 SV=3	5		20.556	20.4932	19.9227	20.4088	19.9125	19.5431	5	3	30.1	120.836	4	1	1	1	1	0	0
CON__P02533				3	+	20.3882	20.2388	20.3028	20.0164	19.1955	19.8944	5	2	13.8	120.036	3	0	1	0	2	0	0
O09167	60S ribosomal protein L21	Rpl21	60S ribosomal protein L21 OS=Mus musculus OX=10090 GN=Rpl21 PE=1 SV=3	2		20.7007	21.8685	21.2834	21.3671	20.2404	20.8025	2	2	16.2	126.263	2	0	0	1	1	0	0
P27659	60S ribosomal protein L3	Rpl3	60S ribosomal protein L3 OS=Mus musculus OX=10090 GN=Rpl3 PE=1 SV=3	8		21.5638	22.031	21.9689	22.1746	20.9808	21.1484	8	8	26.6	129.867	13	1	4	3	3	0	2
P97351	40S ribosomal protein S3a	Rps3a	40S ribosomal protein S3a OS=Mus musculus OX=10090 GN=Rps3a PE=1 SV=3	8		20.948	21.0938	21.839	22.161	20.3328	20.2859	8	8	30.7	126.66	5	0	0	3	2	0	0
P13864	DNA (cytosine-5)-methyltransferase 1	Dnmt1	DNA (cytosine-5)-methyltransferase 1 OS=Mus musculus OX=10090 GN=Dnmt1 PE=1 SV=5	6		19.0075	19.0263	19.9178	19.7642	18.4082	18.2183	6	6	5.6	114.342	0	0	0	0	0	0	0
Q9CYI4	Putative RNA-binding protein Luc7-like 1	Luc7l	Putative RNA-binding protein Luc7-like 1 OS=Mus musculus OX=10090 GN=Luc7l PE=1 SV=2	3		19.085	19.3233	18.1841	18.2167	18.4342	18.5817	3	3	9.4	111.825	2	0	1	0	1	0	0
P62317	Small nuclear ribonucleoprotein Sm D2	Snrpd2	Small nuclear ribonucleoprotein Sm D2 OS=Mus musculus OX=10090 GN=Snrpd2 PE=1 SV=1	3		21.4309	21.637	20.8001	20.8172	20.3838	21.3474	3	3	29.7	126.417	4	0	1	0	2	0	1
Q60668	Heterogeneous nuclear ribonucleoprotein D0	Hnrnpd	Heterogeneous nuclear ribonucleoprotein D0 OS=Mus musculus OX=10090 GN=Hnrnpd PE=1 SV=2	7		21.4156	21.6207	20.4719	20.581	20.7741	20.9308	8	7	19.4	125.794	5	0	1	1	1	1	1
Q6NVF9	Cleavage and polyadenylation specificity factor subunit 6	Cpsf6	Cleavage and polyadenylation specificity factor subunit 6 OS=Mus musculus OX=10090 GN=Cpsf6 PE=1 SV=1	3		19.5718	19.6306	18.4732	18.198	19.0498	18.832	3	3	9.4	113.755	1	0	1	0	0	0	0
Q8K224	N-acetyltransferase 10	Nat10	RNA cytidine acetyltransferase OS=Mus musculus OX=10090 GN=Nat10 PE=1 SV=1	2		NaN	18.0709	17.7189	17.9213	17.4128	NaN	2	2	3.7	71.1239	0	0	0	0	0	0	0
P63325	40S ribosomal protein S10	Rps10	40S ribosomal protein S10 OS=Mus musculus OX=10090 GN=Rps10 PE=1 SV=1	4		19.8937	20.4495	19.8633	19.9916	19.7249	19.3126	4	4	23.6	119.236	1	0	0	0	1	0	0
Q9CPR4	60S ribosomal protein L17	Rpl17	60S ribosomal protein L17 OS=Mus musculus OX=10090 GN=Rpl17 PE=1 SV=3	6		23.6573	23.7306	23.4862	23.3731	23.0183	23.0653	6	6	32.6	140.331	18	4	3	3	3	2	3
P20152	Vimentin	Vim	Vimentin OS=Mus musculus OX=10090 GN=Vim PE=1 SV=3	5		19.0377	20.5509	NaN	NaN	19.1249	19.1864	5	5	13.3	77.9	1	0	1	0	0	0	0
Q9Z2X1	Heterogeneous nuclear ribonucleoprotein F;Heterogeneous nuclear ribonucleoprotein F, N-terminally processed	Hnrnpf	Heterogeneous nuclear ribonucleoprotein F OS=Mus musculus OX=10090 GN=Hnrnpf PE=1 SV=3	10		22.6514	22.6724	22.087	21.8597	22.2471	21.8005	12	10	46	133.318	19	3	4	4	3	3	2
P19253	60S ribosomal protein L13a	Rpl13a	60S ribosomal protein L13a OS=Mus musculus OX=10090 GN=Rpl13a PE=1 SV=4	3		22.0919	22.7892	21.7461	22.0327	21.9374	21.668	3	3	16.3	132.265	11	2	2	1	2	2	2
P62270	40S ribosomal protein S18	Rps18	40S ribosomal protein S18 OS=Mus musculus OX=10090 GN=Rps18 PE=1 SV=3	5		19.9732	20.1766	19.4414	19.605	19.5778	19.3186	5	5	32.2	118.093	6	0	1	1	2	1	1
P62900	60S ribosomal protein L31	Rpl31	60S ribosomal protein L31 OS=Mus musculus OX=10090 GN=Rpl31 PE=1 SV=1	2		21.2726	21.4979	21.3268	21.6106	20.723	20.7942	2	2	15.2	127.225	1	0	0	0	1	0	0
P41105	60S ribosomal protein L28	Rpl28	60S ribosomal protein L28 OS=Mus musculus OX=10090 GN=Rpl28 PE=1 SV=2	4		21.1168	21.7479	21.5924	21.3183	20.7485	20.8678	4	4	24.1	127.392	6	0	2	2	1	0	1
P62315	Small nuclear ribonucleoprotein Sm D1	Snrpd1	Small nuclear ribonucleoprotein Sm D1 OS=Mus musculus OX=10090 GN=Snrpd1 PE=1 SV=1	3		21.5543	22.0938	21.4997	21.0309	21.3092	21.1107	3	3	37	128.599	15	1	3	4	3	2	2
Q8VDD5	Myosin-9	Myh9	Myosin-9 OS=Mus musculus OX=10090 GN=Myh9 PE=1 SV=4	6		21.0083	20.4981	20.123	19.8136	20.2797	20.0242	6	6	4.3	121.747	14	2	3	3	3	1	2
P62267	40S ribosomal protein S23	Rps23	40S ribosomal protein S23 OS=Mus musculus OX=10090 GN=Rps23 PE=1 SV=3	5		21.8405	21.9572	20.4888	22.2342	20.8503	21.7518	5	5	29.4	129.123	8	1	1	0	2	1	3
P62852	40S ribosomal protein S25	Rps25	40S ribosomal protein S25 OS=Mus musculus OX=10090 GN=Rps25 PE=1 SV=1	3		20.7407	19.9011	21.8346	21.8637	19.6926	19.8112	3	3	16	123.844	4	1	0	2	1	0	0
O70194	Eukaryotic translation initiation factor 3 subunit D	Eif3d	Eukaryotic translation initiation factor 3 subunit D OS=Mus musculus OX=10090 GN=Eif3d PE=1 SV=2	4		20.4849	20.5992	20.173	20.1864	19.8464	20.1131	4	4	10.9	121.403	3	0	0	0	2	0	1
P62849	40S ribosomal protein S24	Rps24	40S ribosomal protein S24 OS=Mus musculus OX=10090 GN=Rps24 PE=1 SV=1	4		20.7762	20.9139	21.8708	21.5898	20.547	20.0628	4	4	35.3	125.76	9	0	2	2	3	1	1
P24547	Inosine-5-monophosphate dehydrogenase 2	Impdh2	Inosine-5-monophosphate dehydrogenase 2 OS=Mus musculus OX=10090 GN=Impdh2 PE=1 SV=2	2		19.384	19.6291	18.8345	18.8371	19.1454	18.7926	2	2	4.9	114.623	2	0	0	1	0	0	1
P63101	14-3-3 protein zeta/delta	Ywhaz	14-3-3 protein zeta/delta OS=Mus musculus OX=10090 GN=Ywhaz PE=1 SV=1	2		18.9073	NaN	19.3491	19.1243	19.6459	17.1255	3	2	14.7	94.152	0	0	0	0	0	0	0
Q60817;P70670	Nascent polypeptide-associated complex subunit alpha;Nascent polypeptide-associated complex subunit alpha, muscle-specific form	Naca	Nascent polypeptide-associated complex subunit alpha OS=Mus musculus OX=10090 GN=Naca PE=1 SV=1;Nascent polypeptide-associated complex subunit alpha, muscle-specific form OS=Mus musculus OX=10090 GN=Naca PE=1 SV=2	2		19.4953	19.8579	19.2437	19.4619	19.1482	19.229	2	2	13.5	116.436	3	0	0	1	1	0	1
P62702	40S ribosomal protein S4, X isoform	Rps4x	40S ribosomal protein S4, X isoform OS=Mus musculus OX=10090 GN=Rps4x PE=1 SV=2	8		21.0015	22.4145	21.6767	22.008	21.3572	21.1048	8	8	29.3	129.563	9	0	3	2	3	1	0
Q6ZWN5	40S ribosomal protein S9	Rps9	40S ribosomal protein S9 OS=Mus musculus OX=10090 GN=Rps9 PE=1 SV=3	7		22.2416	22.474	22.1114	22.1475	21.3438	22.4345	7	7	28.4	132.753	12	2	2	1	4	0	3
Q9WVB0	RNA-binding protein with multiple splicing	Rbpms	RNA-binding protein with multiple splicing OS=Mus musculus OX=10090 GN=Rbpms PE=1 SV=2	3		18.3685	18.7965	16.9029	NaN	18.5775	17.6945	5	3	34.5	90.3398	0	0	0	0	0	0	0
Q3UYV9	Nuclear cap-binding protein subunit 1	Ncbp1	Nuclear cap-binding protein subunit 1 OS=Mus musculus OX=10090 GN=Ncbp1 PE=1 SV=2	4		19.0823	18.9659	19.3984	18.9487	18.6953	18.49	4	4	7.1	113.581	1	0	0	1	0	0	0
Q68FD5	Clathrin heavy chain 1	Cltc	Clathrin heavy chain 1 OS=Mus musculus OX=10090 GN=Cltc PE=1 SV=3	4		18.694	21.3345	18.2997	18.31	18.9532	20.2351	4	4	3.6	115.827	4	0	3	0	0	0	1
Q8BP67	60S ribosomal protein L24	Rpl24	60S ribosomal protein L24 OS=Mus musculus OX=10090 GN=Rpl24 PE=1 SV=2	3		21.5549	22.0298	22.0704	22.1006	NaN	21.3919	3	3	19.1	109.148	4	0	1	1	2	0	0
Q7TNC4	Putative RNA-binding protein Luc7-like 2	Luc7l2	Putative RNA-binding protein Luc7-like 2 OS=Mus musculus OX=10090 GN=Luc7l2 PE=1 SV=1	2		18.2842	18.5352	18.5097	NaN	18.0098	NaN	2	2	6.1	73.339	0	0	0	0	0	0	0
Q8VH51	RNA-binding protein 39	Rbm39	RNA-binding protein 39 OS=Mus musculus OX=10090 GN=Rbm39 PE=1 SV=2	5		20.3761	20.6585	20.0461	19.5842	20.3229	19.9127	5	5	12.6	120.9	2	0	1	0	1	0	0
CON__P02769				27	+	30.8018	29.9424	30.1842	29.3642	30.4541	29.5014	27	23	35.7	180.248	419	78	62	79	58	79	63
P43276	Histone H1.5	Hist1h1b	Histone H1.5 OS=Mus musculus OX=10090 GN=H1-5 PE=1 SV=2	3		21.8541	21.1013	21.761	22.5067	20.363	21.8052	4	3	20.6	129.391	8	1	0	2	3	0	2
Q6ZWX6	Eukaryotic translation initiation factor 2 subunit 1	Eif2s1	Eukaryotic translation initiation factor 2 subunit 1 OS=Mus musculus OX=10090 GN=Eif2s1 PE=1 SV=3	3		19.3646	20.5537	19.6834	20.0597	19.5626	19.5863	3	3	14.6	118.81	5	0	1	0	3	0	1
Q02053	Ubiquitin-like modifier-activating enzyme 1	Uba1	Ubiquitin-like modifier-activating enzyme 1 OS=Mus musculus OX=10090 GN=Uba1 PE=1 SV=1	8		20.1904	22.54	20.0989	19.5049	20.9952	20.9657	8	8	12	124.295	12	0	9	0	0	1	2
P43277	Histone H1.3	Hist1h1d	Histone H1.3 OS=Mus musculus OX=10090 GN=H1-3 PE=1 SV=2	3		22.6575	22.5024	23.0055	23.9768	21.4604	22.9462	5	1	25.3	136.549	9	2	1	1	2	2	1
P56959	RNA-binding protein FUS	Fus	RNA-binding protein FUS OS=Mus musculus OX=10090 GN=Fus PE=1 SV=1	8		21.1866	21.5888	19.8204	21.526	21.3689	20.6788	8	8	18.1	126.17	6	0	1	1	3	1	0
O88477	Insulin-like growth factor 2 mRNA-binding protein 1	Igf2bp1	Insulin-like growth factor 2 mRNA-binding protein 1 OS=Mus musculus OX=10090 GN=Igf2bp1 PE=1 SV=1	17		21.0712	21.7496	21.4141	20.9868	21.1324	20.9777	17	16	35.4	127.332	17	1	4	3	6	1	2
P01868;P01869	Ig gamma-1 chain C region secreted form;Ig gamma-1 chain C region, membrane-bound form	Ighg1	Ig gamma-1 chain C region secreted form OS=Mus musculus OX=10090 GN=Ighg1 PE=1 SV=1;Ig gamma-1 chain C region, membrane-bound form OS=Mus musculus OX=10090 GN=Ighg1 PE=1 SV=2	7		28.7308	28.8809	28.7803	28.2534	28.3252	28.5844	7	7	26.2	171.555	85	14	16	15	13	12	15
P97379	Ras GTPase-activating protein-binding protein 2	G3bp2	Ras GTPase-activating protein-binding protein 2 OS=Mus musculus OX=10090 GN=G3bp2 PE=1 SV=2	4		19.8839	20.383	20.0294	19.7385	19.7252	19.8569	5	4	11	119.617	4	0	1	1	1	1	0
P62830	60S ribosomal protein L23	Rpl23	60S ribosomal protein L23 OS=Mus musculus OX=10090 GN=Rpl23 PE=1 SV=1	3		21.6306	22.2662	22.0434	22.1703	20.8694	22.3474	3	3	23.6	131.327	4	0	1	1	2	0	0
P63323	40S ribosomal protein S12	Rps12	40S ribosomal protein S12 OS=Mus musculus OX=10090 GN=Rps12 PE=1 SV=2	3		19.9627	20.4476	20.3834	20.8249	20.0069	19.7288	3	3	30.3	121.354	1	0	0	0	1	0	0
Q9CXW2	28S ribosomal protein S22, mitochondrial	Mrps22	28S ribosomal protein S22, mitochondrial OS=Mus musculus OX=10090 GN=Mrps22 PE=1 SV=1	8		17.1074	17.0635	16.4879	17.1225	16.7549	NaN	8	8	29.5	84.5361	0	0	0	0	0	0	0
Q9JII5	DAZ-associated protein 1	Dazap1	DAZ-associated protein 1 OS=Mus musculus OX=10090 GN=Dazap1 PE=1 SV=2	4		18.8	17.3838	17.5522	18.0167	NaN	17.7636	4	4	17	89.5164	0	0	0	0	0	0	0
Q99MN1	Lysine--tRNA ligase	Kars	Lysine--tRNA ligase OS=Mus musculus OX=10090 GN=Kars1 PE=1 SV=1	4		18.987	19.1177	18.7157	19.0736	18.5426	18.91	4	4	7.2	113.346	2	0	1	0	1	0	0
Q3UEB3	Poly(U)-binding-splicing factor PUF60	Puf60	Poly(U)-binding-splicing factor PUF60 OS=Mus musculus OX=10090 GN=Puf60 PE=1 SV=2	3		18.9624	18.48	18.1357	18.2382	18.5172	18.2751	3	3	7.8	110.609	0	0	0	0	0	0	0
Q3TUF7	YEATS domain-containing protein 2	Yeats2	YEATS domain-containing protein 2 OS=Mus musculus OX=10090 GN=Yeats2 PE=1 SV=2	2		30.1722	29.9896	29.7595	29.992	29.8794	29.6502	2	2	2	179.443	1	0	0	0	1	0	0
P84099	60S ribosomal protein L19	Rpl19	60S ribosomal protein L19 OS=Mus musculus OX=10090 GN=Rpl19 PE=1 SV=1	2		21.2758	21.5362	21.094	21.3354	21.5414	20.6454	2	2	13.3	127.428	7	1	2	1	1	1	1
Q99ME9	Nucleolar GTP-binding protein 1	Gtpbp4	Nucleolar GTP-binding protein 1 OS=Mus musculus OX=10090 GN=Gtpbp4 PE=1 SV=3	5		NaN	19.4187	19.0981	19.5545	NaN	19.1294	5	5	9.8	77.2007	1	0	0	0	1	0	0
B2RQC6	CAD protein;Glutamine-dependent carbamoyl-phosphate synthase;Aspartate carbamoyltransferase;Dihydroorotase	Cad	CAD protein OS=Mus musculus OX=10090 GN=Cad PE=1 SV=1	8		20.1377	20.1355	19.2862	19.4606	19.7522	19.9461	8	8	4.8	118.718	3	0	0	1	1	0	1
Q6ZWV3;P86048	60S ribosomal protein L10;60S ribosomal protein L10-like	Rpl10;Rpl10l	60S ribosomal protein L10 OS=Mus musculus OX=10090 GN=Rpl10 PE=1 SV=3;60S ribosomal protein L10-like OS=Mus musculus OX=10090 GN=Rpl10l PE=2 SV=1	5		21.7896	22.3346	21.8429	22.1579	21.9291	21.6291	5	5	21	131.683	8	0	2	1	1	2	2
Q91VR2	ATP synthase subunit gamma, mitochondrial	Atp5c1	ATP synthase subunit gamma, mitochondrial OS=Mus musculus OX=10090 GN=Atp5f1c PE=1 SV=1	4		NaN	23.881	23.7922	23.9227	NaN	23.6095	4	4	14.4	95.2055	7	0	2	1	3	1	0
O88508	DNA (cytosine-5)-methyltransferase 3A	Dnmt3a	DNA (cytosine-5)-methyltransferase 3A OS=Mus musculus OX=10090 GN=Dnmt3a PE=1 SV=2	3		18.0281	18.3742	18.0082	17.9728	18.0555	17.8124	3	3	3.9	108.251	0	0	0	0	0	0	0
P29341	Polyadenylate-binding protein 1	Pabpc1	Polyadenylate-binding protein 1 OS=Mus musculus OX=10090 GN=Pabpc1 PE=1 SV=2	17		20.4538	20.7394	20.5112	20.3284	20.27	20.391	17	17	35.4	122.694	14	1	3	3	4	1	2
Q921F2	TAR DNA-binding protein 43	Tardbp	TAR DNA-binding protein 43 OS=Mus musculus OX=10090 GN=Tardbp PE=1 SV=1	10		19.7679	21.0838	19.7425	20.1599	20.0841	20.2609	10	10	29.2	121.099	5	0	2	1	2	0	0
P43275	Histone H1.1	Hist1h1a	Histone H1.1 OS=Mus musculus OX=10090 GN=H1-1 PE=1 SV=2	6		22.9696	23.1509	24.0337	24.371	22.1753	23.4422	6	4	36.2	140.143	13	1	1	4	4	1	2
P57776	Elongation factor 1-delta	Eef1d	Elongation factor 1-delta OS=Mus musculus OX=10090 GN=Eef1d PE=1 SV=3	4		21.0335	21.4479	20.411	20.5994	20.8125	21.1839	4	4	16.4	125.488	10	1	3	1	2	1	2
Q8VDW0	ATP-dependent RNA helicase DDX39A	Ddx39a	ATP-dependent RNA helicase DDX39A OS=Mus musculus OX=10090 GN=Ddx39a PE=1 SV=1	9		21.8328	22.3723	21.9893	22.0364	22.0284	21.7135	9	3	23.7	131.973	9	1	1	2	3	1	1
Q64152	Transcription factor BTF3	Btf3	Transcription factor BTF3 OS=Mus musculus OX=10090 GN=Btf3 PE=1 SV=3	2		18.5207	18.1936	18.5867	18.8519	18.2635	18.0015	2	2	20.1	110.418	0	0	0	0	0	0	0
Q9D6Z1	Nucleolar protein 56	Nop56	Nucleolar protein 56 OS=Mus musculus OX=10090 GN=Nop56 PE=1 SV=2	7		19.0605	19.6903	20.0768	19.7832	19.0787	19.2236	7	7	15.3	116.913	6	0	1	2	2	0	1
P14131	40S ribosomal protein S16	Rps16	40S ribosomal protein S16 OS=Mus musculus OX=10090 GN=Rps16 PE=1 SV=4	7		21.5706	22.2141	22.0933	22.1028	21.3718	21.9664	7	7	43.8	131.319	11	0	3	3	4	0	1
P35550	rRNA 2-O-methyltransferase fibrillarin	Fbl	rRNA 2-O-methyltransferase fibrillarin OS=Mus musculus OX=10090 GN=Fbl PE=1 SV=2	8		21.9589	22.1723	22.4193	22.6087	21.9254	21.762	8	8	29.7	132.847	20	1	3	3	7	2	4
Q8CGP2;Q8CGP1;Q6ZWY9;Q64525;Q64478;Q64475;P10854;P10853	Histone H2B type 1-P;Histone H2B type 1-K;Histone H2B type 1-C/E/G;Histone H2B type 2-B;Histone H2B type 1-H;Histone H2B type 1-B;Histone H2B type 1-M;Histone H2B type 1-F/J/L	Hist1h2bp;Hist1h2bk;Hist1h2bc;Hist2h2bb;Hist1h2bh;Hist1h2bb;Hist1h2bm;Hist1h2bf	Histone H2B type 1-P OS=Mus musculus OX=10090 GN=Hist1h2bp PE=1 SV=3;Histone H2B type 1-K OS=Mus musculus OX=10090 GN=H2bc12 PE=1 SV=3;Histone H2B type 1-C/E/G OS=Mus musculus OX=10090 GN=H2bc4 PE=1 SV=3;Histone H2B type 2-B OS=Mus musculus OX=10090 GN=His	5		25.6812	26.0163	26.9502	27.4661	25.8084	25.4578	5	5	34.1	157.38	21	2	3	6	4	3	3
O70251	Elongation factor 1-beta	Eef1b	Elongation factor 1-beta OS=Mus musculus OX=10090 GN=Eef1b PE=1 SV=5	2		NaN	20.2107	18.8225	18.6776	19.5662	20.4343	2	2	12.4	97.7114	3	0	2	0	0	0	1
Q8K310	Matrin-3	Matr3	Matrin-3 OS=Mus musculus OX=10090 GN=Matr3 PE=1 SV=1	26		20.334	20.2913	20.2939	19.8478	20.2462	19.9694	26	26	43.3	120.983	12	1	1	4	5	0	1
P60867	40S ribosomal protein S20	Rps20	40S ribosomal protein S20 OS=Mus musculus OX=10090 GN=Rps20 PE=1 SV=1	2		22.0489	22.2143	22.5153	22.2286	21.6463	22.2115	2	2	19.3	132.865	10	1	2	2	2	2	1
P67984	60S ribosomal protein L22	Rpl22	60S ribosomal protein L22 OS=Mus musculus OX=10090 GN=Rpl22 PE=1 SV=2	2		21.0049	21.4465	21.0377	21.1311	21.0639	20.9872	2	2	18.8	126.671	5	1	1	0	2	0	1
P62962;CON__P02584	Profilin-1	Pfn1	Profilin-1 OS=Mus musculus OX=10090 GN=Pfn1 PE=1 SV=2;	4	+	NaN	19.9512	19.1852	19.3419	19.8083	19.7018	4	4	40	97.9883	0	0	0	0	0	0	0
F7BJB9		Morc3	MORC family CW-type zinc finger protein 3 OS=Mus musculus OX=10090 GN=Morc3 PE=1 SV=1	4		19.6631	20.3775	20.3915	19.7385	19.5759	20.0764	4	4	6.4	119.823	4	0	2	1	0	0	1
Q9CQF3	Cleavage and polyadenylation specificity factor subunit 5	Nudt21	Cleavage and polyadenylation specificity factor subunit 5 OS=Mus musculus OX=10090 GN=Nudt21 PE=1 SV=1	5		19.5853	19.2653	18.5965	18.7584	19.0801	19.4011	5	5	36.1	114.687	1	0	0	0	0	0	1
Q05CL8	La-related protein 7	Larp7	La-related protein 7 OS=Mus musculus OX=10090 GN=Larp7 PE=1 SV=2	4		18.111	18.4004	18.5491	18.4779	17.7521	18.396	4	4	8.6	109.687	0	0	0	0	0	0	0
Q91VC3	Eukaryotic initiation factor 4A-III;Eukaryotic initiation factor 4A-III, N-terminally processed	Eif4a3	Eukaryotic initiation factor 4A-III OS=Mus musculus OX=10090 GN=Eif4a3 PE=1 SV=3	9		20.3735	20.8921	20.8328	20.9419	20.2923	20.6269	10	9	27	123.959	7	0	1	2	2	0	2
Q8BVY0	Ribosomal L1 domain-containing protein 1	Rsl1d1	Ribosomal L1 domain-containing protein 1 OS=Mus musculus OX=10090 GN=Rsl1d1 PE=1 SV=1	4		NaN	20.0162	20.0859	20.7421	19.4337	20.2557	4	4	15.7	100.533	5	0	1	1	2	0	1
Q99PV0	Pre-mRNA-processing-splicing factor 8	Prpf8	Pre-mRNA-processing-splicing factor 8 OS=Mus musculus OX=10090 GN=Prpf8 PE=1 SV=2	15		20.0342	20.325	19.9944	19.5339	19.9949	20.0255	15	15	8.6	119.908	6	0	1	3	1	0	1
P60843	Eukaryotic initiation factor 4A-I	Eif4a1	Eukaryotic initiation factor 4A-I OS=Mus musculus OX=10090 GN=Eif4a1 PE=1 SV=1	12		22.2909	22.8544	22.4425	22.278	22.3889	22.4205	12	11	36.5	134.675	41	6	9	9	6	6	5
P47963	60S ribosomal protein L13	Rpl13	60S ribosomal protein L13 OS=Mus musculus OX=10090 GN=Rpl13 PE=1 SV=3	6		22.0363	22.4883	21.7836	22.1641	22.265	21.9271	6	6	28.4	132.664	12	2	3	2	2	2	1
Q6DFW4	Nucleolar protein 58	Nop58	Nucleolar protein 58 OS=Mus musculus OX=10090 GN=Nop58 PE=1 SV=1	9		19.458	20.5661	20.1691	20.568	19.6109	20.0938	9	9	25	120.466	9	0	1	0	7	0	1
Q8CI11	Guanine nucleotide-binding protein-like 3	Gnl3	Guanine nucleotide-binding protein-like 3 OS=Mus musculus OX=10090 GN=Gnl3 PE=1 SV=2	5		18.6077	18.8199	19.5363	19.6813	18.9167	18.1954	5	5	12.3	113.757	3	0	0	0	2	0	1
Q8R1B4	Eukaryotic translation initiation factor 3 subunit C	Eif3c	Eukaryotic translation initiation factor 3 subunit C OS=Mus musculus OX=10090 GN=Eif3c PE=1 SV=1	2		18.9692	19.0919	20.0568	17.4239	19.0684	18.6906	2	2	2.2	113.301	3	0	1	1	1	0	0
Q99N96	39S ribosomal protein L1, mitochondrial	Mrpl1	39S ribosomal protein L1, mitochondrial OS=Mus musculus OX=10090 GN=Mrpl1 PE=1 SV=2	5		20.047	19.8679	19.5239	19.5531	19.7673	19.8458	5	5	21.4	118.605	0	0	0	0	0	0	0
Q8K019	Bcl-2-associated transcription factor 1	Bclaf1	Bcl-2-associated transcription factor 1 OS=Mus musculus OX=10090 GN=Bclaf1 PE=1 SV=2	5		20.3462	20.0238	21.4019	21.7112	20.3716	19.7017	5	5	7.4	123.556	3	0	0	1	2	0	0
P25444	40S ribosomal protein S2	Rps2	40S ribosomal protein S2 OS=Mus musculus OX=10090 GN=Rps2 PE=1 SV=3	10		22.2943	22.3993	22.081	22.1712	22.0984	22.3057	10	10	36.9	133.35	28	5	2	5	5	4	7
P62264	40S ribosomal protein S14	Rps14	40S ribosomal protein S14 OS=Mus musculus OX=10090 GN=Rps14 PE=1 SV=3	6		22.2534	22.4158	22.4683	22.5449	22.0912	22.3038	6	6	37.7	134.077	19	2	3	4	3	3	4
Q9CSH3	Exosome complex exonuclease RRP44	Dis3	Exosome complex exonuclease RRP44 OS=Mus musculus OX=10090 GN=Dis3 PE=1 SV=4	5		20.55	20.1131	20.3084	20.1813	20.2723	20.1817	5	5	6.5	121.607	3	0	0	0	3	0	0
P62082	40S ribosomal protein S7	Rps7	40S ribosomal protein S7 OS=Mus musculus OX=10090 GN=Rps7 PE=2 SV=1	5		21.4178	21.617	22.3305	22.134	21.6112	21.2379	5	5	26.8	130.349	9	1	2	3	2	1	0
P14115	60S ribosomal protein L27a	Rpl27a	60S ribosomal protein L27a OS=Mus musculus OX=10090 GN=Rpl27a PE=1 SV=5	2		22.4819	22.3256	22.1876	22.3711	22.3113	22.317	2	2	14.2	133.995	3	0	1	0	1	1	0
Q8CGC7	Bifunctional glutamate/proline--tRNA ligase;Glutamate--tRNA ligase;Proline--tRNA ligase	Eprs	Bifunctional glutamate/proline--tRNA ligase OS=Mus musculus OX=10090 GN=Eprs1 PE=1 SV=4	6		18.5286	19.1863	19.1917	18.8947	18.8455	18.7008	6	6	5.2	113.347	0	0	0	0	0	0	0
P62806	Histone H4	Hist1h4a	Histone H4 OS=Mus musculus OX=10090 GN=H4c1 PE=1 SV=2	9		24.3965	23.8921	25.2602	25.9743	23.7956	24.3308	9	9	59.2	147.649	42	5	6	9	12	5	5
Q9D0I9	Arginine--tRNA ligase, cytoplasmic	Rars	Arginine--tRNA ligase, cytoplasmic OS=Mus musculus OX=10090 GN=Rars1 PE=1 SV=2	2		18.3039	18.4055	18.0689	18.4241	18.2841	18.2811	2	2	3.5	109.768	1	0	0	0	1	0	0
P19096	Fatty acid synthase;[Acyl-carrier-protein] S-acetyltransferase;[Acyl-carrier-protein] S-malonyltransferase;3-oxoacyl-[acyl-carrier-protein] synthase;3-oxoacyl-[acyl-carrier-protein] reductase;3-hydroxyacyl-[acyl-carrier-protein] dehydratase;Enoyl-[acyl-carrier-protein] reductase;Oleoyl-[acyl-carrier-protein] hydrolase	Fasn	Fatty acid synthase OS=Mus musculus OX=10090 GN=Fasn PE=1 SV=2	8		19.7706	20.3705	19.3585	19.2091	19.7514	20.2469	8	8	4.9	118.707	9	0	3	1	1	0	4
P62281	40S ribosomal protein S11	Rps11	40S ribosomal protein S11 OS=Mus musculus OX=10090 GN=Rps11 PE=1 SV=3	5		21.7714	21.9114	22.1445	22.1528	21.6365	21.9261	5	5	21.5	131.543	13	0	1	4	4	2	2
Q9CQD1;P61021;P35278	Ras-related protein Rab-5A;Ras-related protein Rab-5B;Ras-related protein Rab-5C	Rab5a;Rab5b;Rab5c	Ras-related protein Rab-5A OS=Mus musculus OX=10090 GN=Rab5a PE=1 SV=1;Ras-related protein Rab-5B OS=Mus musculus OX=10090 GN=Rab5b PE=1 SV=1;Ras-related protein Rab-5C OS=Mus musculus OX=10090 GN=Rab5c PE=1 SV=2	2		21.088	21.0019	21.2809	20.9528	20.8903	21.0829	2	2	10.7	126.297	1	0	0	1	0	0	0
Q9CY27	Very-long-chain enoyl-CoA reductase	Tecr	Very-long-chain enoyl-CoA reductase OS=Mus musculus OX=10090 GN=Tecr PE=1 SV=1	2		NaN	18.5523	19.1303	19.4827	18.074	18.9178	2	2	6.8	94.1572	2	0	0	1	1	0	0
Q61539	Steroid hormone receptor ERR2	Esrrb	Steroid hormone receptor ERR2 OS=Mus musculus OX=10090 GN=Esrrb PE=1 SV=2	3		20.9288	19.6449	20.3496	19.9012	19.7172	20.7508	3	3	10.2	121.293	5	0	0	1	1	1	2
P14869	60S acidic ribosomal protein P0	Rplp0	60S acidic ribosomal protein P0 OS=Mus musculus OX=10090 GN=Rplp0 PE=1 SV=3	6		21.1383	21.8505	21.3797	21.1726	21.6863	21.2179	6	6	27.1	128.445	12	0	4	2	1	3	2
P54823	Probable ATP-dependent RNA helicase DDX6	Ddx6	Probable ATP-dependent RNA helicase DDX6 OS=Mus musculus OX=10090 GN=Ddx6 PE=1 SV=1	2		17.8398	18.71	18.0157	18.0292	18.1687	18.3005	2	2	5.2	109.064	0	0	0	0	0	0	0
P35979	60S ribosomal protein L12	Rpl12	60S ribosomal protein L12 OS=Mus musculus OX=10090 GN=Rpl12 PE=1 SV=2	3		20.7323	21.3356	20.8823	20.6309	20.8864	21.1025	3	3	24.2	125.57	4	1	0	1	1	1	0
P24270	Catalase	Cat	Catalase OS=Mus musculus OX=10090 GN=Cat PE=1 SV=4	6		20.8036	21.0272	20.8645	19.9416	21.155	20.6017	6	6	17.1	124.394	15	2	2	2	3	2	4
P01837	Ig kappa chain C region		Immunoglobulin kappa constant OS=Mus musculus OX=10090 GN=Igkc PE=1 SV=2	4		24.2973	24.1133	25.0093	23.5629	24.3363	24.0325	4	4	38.3	145.352	16	2	2	3	4	2	3
P32067	Lupus La protein homolog	Ssb	Lupus La protein homolog OS=Mus musculus OX=10090 GN=Ssb PE=1 SV=1	13		20.7251	20.7371	20.7036	20.7984	20.2939	21.1435	13	13	32	124.402	2	0	1	0	1	0	0
CON__P00761				6	+	32.8993	32.58	32.8118	32.1052	32.8311	32.6402	6	6	25.1	195.868	150	25	22	24	26	24	29
O35972	39S ribosomal protein L23, mitochondrial	Mrpl23	39S ribosomal protein L23, mitochondrial OS=Mus musculus OX=10090 GN=Mrpl23 PE=1 SV=1	3		NaN	NaN	NaN	NaN	NaN	NaN	3	3	29.5	0	0	0	0	0	0	0	0
Q14C51	Pentatricopeptide repeat domain-containing protein 3, mitochondrial	Ptcd3	Pentatricopeptide repeat domain-containing protein 3, mitochondrial OS=Mus musculus OX=10090 GN=Ptcd3 PE=1 SV=2	5		NaN	NaN	17.4039	NaN	NaN	NaN	5	5	8.8	17.4039	0	0	0	0	0	0	0
Q3TXU5	Deoxyhypusine synthase	Dhps	Deoxyhypusine synthase OS=Mus musculus OX=10090 GN=Dhps PE=1 SV=2	3		NaN	NaN	19.9003	19.5019	NaN	NaN	3	3	11.9	39.4022	5	0	0	3	2	0	0
Q3UMQ8	H/ACA ribonucleoprotein complex non-core subunit NAF1	Naf1	H/ACA ribonucleoprotein complex non-core subunit NAF1 OS=Mus musculus OX=10090 GN=Naf1 PE=1 SV=2	2		NaN	NaN	20.3269	20.0083	NaN	NaN	2	2	4.9	40.3351	2	0	0	1	1	0	0
Q62383	Transcription elongation factor SPT6	Supt6h	Transcription elongation factor SPT6 OS=Mus musculus OX=10090 GN=Supt6h PE=1 SV=2	2		NaN	NaN	18.9721	18.5394	NaN	NaN	2	2	1.7	37.5116	0	0	0	0	0	0	0
Q6ZQ58	La-related protein 1	Larp1	La-related protein 1 OS=Mus musculus OX=10090 GN=Larp1 PE=1 SV=3	2		NaN	NaN	17.9238	17.5534	NaN	NaN	2	2	2.8	35.4772	0	0	0	0	0	0	0
Q80X85	28S ribosomal protein S7, mitochondrial	Mrps7	28S ribosomal protein S7, mitochondrial OS=Mus musculus OX=10090 GN=Mrps7 PE=1 SV=1	3		NaN	NaN	16.2394	NaN	NaN	NaN	3	3	18.2	16.2394	0	0	0	0	0	0	0
Q80ZS3	28S ribosomal protein S26, mitochondrial	Mrps26	28S ribosomal protein S26, mitochondrial OS=Mus musculus OX=10090 GN=Mrps26 PE=1 SV=1	2		NaN	NaN	17.2679	17.0818	NaN	NaN	2	2	11.5	34.3497	0	0	0	0	0	0	0
Q8BHN5	RNA-binding protein 45	Rbm45	RNA-binding protein 45 OS=Mus musculus OX=10090 GN=Rbm45 PE=1 SV=1	2		NaN	NaN	NaN	NaN	NaN	NaN	2	2	5.5	0	0	0	0	0	0	0	0
Q8BJZ4	28S ribosomal protein S35, mitochondrial	Mrps35	28S ribosomal protein S35, mitochondrial OS=Mus musculus OX=10090 GN=Mrps35 PE=1 SV=2	2		NaN	NaN	16.4116	16.8772	NaN	NaN	2	2	8.1	33.2888	0	0	0	0	0	0	0
Q8BK72	28S ribosomal protein S27, mitochondrial	Mrps27	28S ribosomal protein S27, mitochondrial OS=Mus musculus OX=10090 GN=Mrps27 PE=1 SV=2	5		NaN	NaN	NaN	NaN	NaN	NaN	5	5	21.4	0	0	0	0	0	0	0	0
Q8BKS9	Pumilio domain-containing protein KIAA0020	Kiaa0020	Pumilio homolog 3 OS=Mus musculus OX=10090 GN=Pum3 PE=1 SV=2	3		NaN	NaN	17.0741	16.7418	NaN	NaN	3	3	7.4	33.8159	0	0	0	0	0	0	0
Q8BU88	39S ribosomal protein L22, mitochondrial	Mrpl22	39S ribosomal protein L22, mitochondrial OS=Mus musculus OX=10090 GN=Mrpl22 PE=1 SV=1	3		NaN	NaN	15.5885	NaN	NaN	NaN	3	3	20.4	15.5885	0	0	0	0	0	0	0
Q8R035	Peptidyl-tRNA hydrolase ICT1, mitochondrial	Ict1	Peptidyl-tRNA hydrolase ICT1, mitochondrial OS=Mus musculus OX=10090 GN=Mrpl58 PE=1 SV=1	4		NaN	NaN	NaN	NaN	NaN	NaN	4	4	24.3	0	0	0	0	0	0	0	0
Q8R326	Paraspeckle component 1	Pspc1	Paraspeckle component 1 OS=Mus musculus OX=10090 GN=Pspc1 PE=1 SV=1	4		NaN	NaN	NaN	16.9413	NaN	NaN	4	4	11.5	16.9413	0	0	0	0	0	0	0
Q8VDM6	Heterogeneous nuclear ribonucleoprotein U-like protein 1	Hnrnpul1	Heterogeneous nuclear ribonucleoprotein U-like protein 1 OS=Mus musculus OX=10090 GN=Hnrnpul1 PE=1 SV=1	6		NaN	NaN	NaN	NaN	NaN	NaN	6	6	8.4	0	0	0	0	0	0	0	0
Q8VDT9	39S ribosomal protein L50, mitochondrial	Mrpl50	39S ribosomal protein L50, mitochondrial OS=Mus musculus OX=10090 GN=Mrpl50 PE=1 SV=2	3		NaN	NaN	17.6528	17.2662	NaN	NaN	3	3	34	34.919	0	0	0	0	0	0	0
Q8VE22	28S ribosomal protein S23, mitochondrial	Mrps23	28S ribosomal protein S23, mitochondrial OS=Mus musculus OX=10090 GN=Mrps23 PE=1 SV=1	4		NaN	NaN	NaN	NaN	NaN	NaN	4	4	29.9	0	0	0	0	0	0	0	0
Q921F4	Heterogeneous nuclear ribonucleoprotein L-like	Hnrnpll	Heterogeneous nuclear ribonucleoprotein L-like OS=Mus musculus OX=10090 GN=Hnrnpll PE=1 SV=3	8		NaN	NaN	18.339	17.5321	NaN	NaN	8	8	20.5	35.8712	0	0	0	0	0	0	0
Q923E4	NAD-dependent protein deacetylase sirtuin-1;SirtT1 75 kDa fragment	Sirt1	NAD-dependent protein deacetylase sirtuin-1 OS=Mus musculus OX=10090 GN=Sirt1 PE=1 SV=2	2		NaN	NaN	19.6455	19.7571	NaN	NaN	2	2	4.7	39.4027	2	0	0	1	1	0	0
Q924T2	28S ribosomal protein S2, mitochondrial	Mrps2	28S ribosomal protein S2, mitochondrial OS=Mus musculus OX=10090 GN=Mrps2 PE=1 SV=1	3		NaN	NaN	NaN	16.5947	NaN	NaN	3	3	17.2	16.5947	0	0	0	0	0	0	0
Q99N92	39S ribosomal protein L27, mitochondrial	Mrpl27	39S ribosomal protein L27, mitochondrial OS=Mus musculus OX=10090 GN=Mrpl27 PE=1 SV=1	3		NaN	NaN	NaN	NaN	NaN	NaN	3	3	24.3	0	0	0	0	0	0	0	0
Q99N94	39S ribosomal protein L9, mitochondrial	Mrpl9	39S ribosomal protein L9, mitochondrial OS=Mus musculus OX=10090 GN=Mrpl9 PE=1 SV=2	4		NaN	NaN	NaN	NaN	NaN	NaN	4	4	19.2	0	0	0	0	0	0	0	0
Q99PU8	Putative ATP-dependent RNA helicase DHX30	Dhx30	ATP-dependent RNA helicase DHX30 OS=Mus musculus OX=10090 GN=Dhx30 PE=1 SV=1	3		NaN	NaN	18.1542	18.1719	NaN	NaN	3	3	4.2	36.3261	0	0	0	0	0	0	0
Q9CPN8	Insulin-like growth factor 2 mRNA-binding protein 3	Igf2bp3	Insulin-like growth factor 2 mRNA-binding protein 3 OS=Mus musculus OX=10090 GN=Igf2bp3 PE=1 SV=1	2		NaN	NaN	NaN	NaN	NaN	NaN	3	1	6.4	0	0	0	0	0	0	0	0
Q9CPR5	39S ribosomal protein L15, mitochondrial	Mrpl15	39S ribosomal protein L15, mitochondrial OS=Mus musculus OX=10090 GN=Mrpl15 PE=1 SV=1	5		NaN	NaN	NaN	NaN	NaN	NaN	5	5	22.4	0	0	0	0	0	0	0	0
Q9CPS7	RNA-binding protein PNO1	Pno1	RNA-binding protein PNO1 OS=Mus musculus OX=10090 GN=Pno1 PE=1 SV=1	3		NaN	NaN	19.3001	19.8184	NaN	NaN	3	3	20.2	39.1185	3	0	0	1	2	0	0
Q9CQL4	39S ribosomal protein L20, mitochondrial	Mrpl20	39S ribosomal protein L20, mitochondrial OS=Mus musculus OX=10090 GN=Mrpl20 PE=1 SV=1	3		NaN	NaN	NaN	19.4562	NaN	NaN	3	3	28.9	19.4562	0	0	0	0	0	0	0
Q9CQL5	39S ribosomal protein L18, mitochondrial	Mrpl18	39S ribosomal protein L18, mitochondrial OS=Mus musculus OX=10090 GN=Mrpl18 PE=1 SV=1	2		NaN	NaN	NaN	NaN	NaN	NaN	2	2	11.7	0	0	0	0	0	0	0	0
Q9CQN7	39S ribosomal protein L41, mitochondrial	Mrpl41	39S ribosomal protein L41, mitochondrial OS=Mus musculus OX=10090 GN=Mrpl41 PE=1 SV=1	2		NaN	NaN	NaN	NaN	NaN	NaN	2	2	17.8	0	0	0	0	0	0	0	0
Q9CQT2	RNA-binding protein 7	Rbm7	RNA-binding protein 7 OS=Mus musculus OX=10090 GN=Rbm7 PE=1 SV=1	2		NaN	NaN	NaN	NaN	NaN	NaN	2	2	19.6	0	0	0	0	0	0	0	0
Q9CY73	39S ribosomal protein L44, mitochondrial	Mrpl44	39S ribosomal protein L44, mitochondrial OS=Mus musculus OX=10090 GN=Mrpl44 PE=1 SV=3	5		NaN	NaN	NaN	NaN	NaN	NaN	5	5	25.5	0	0	0	0	0	0	0	0
Q9CZU4	GTPase Era, mitochondrial	Eral1	GTPase Era, mitochondrial OS=Mus musculus OX=10090 GN=Eral1 PE=2 SV=1	2		NaN	NaN	NaN	NaN	NaN	NaN	2	2	5.5	0	0	0	0	0	0	0	0
Q9D773	39S ribosomal protein L2, mitochondrial	Mrpl2	39S ribosomal protein L2, mitochondrial OS=Mus musculus OX=10090 GN=Mrpl2 PE=1 SV=1	2		NaN	NaN	NaN	NaN	NaN	NaN	2	2	14.1	0	0	0	0	0	0	0	0
Q9DCI9	39S ribosomal protein L32, mitochondrial	Mrpl32	39S ribosomal protein L32, mitochondrial OS=Mus musculus OX=10090 GN=Mrpl32 PE=1 SV=1	2		NaN	NaN	NaN	NaN	NaN	NaN	2	2	16	0	0	0	0	0	0	0	0
Q9DCU6	39S ribosomal protein L4, mitochondrial	Mrpl4	39S ribosomal protein L4, mitochondrial OS=Mus musculus OX=10090 GN=Mrpl4 PE=1 SV=1	7		NaN	NaN	16.4844	16.4471	NaN	NaN	7	7	30.6	32.9316	0	0	0	0	0	0	0
Q9EPL8	Importin-7	Ipo7	Importin-7 OS=Mus musculus OX=10090 GN=Ipo7 PE=1 SV=2	2		NaN	NaN	18.348	17.9989	NaN	NaN	2	2	2.6	36.3469	0	0	0	0	0	0	0
Q9ESX5	H/ACA ribonucleoprotein complex subunit 4	Dkc1	H/ACA ribonucleoprotein complex subunit DKC1 OS=Mus musculus OX=10090 GN=Dkc1 PE=1 SV=4	2		NaN	NaN	NaN	19.3906	NaN	NaN	2	2	5.9	19.3906	0	0	0	0	0	0	0
Q9JIK9	28S ribosomal protein S34, mitochondrial	Mrps34	28S ribosomal protein S34, mitochondrial OS=Mus musculus OX=10090 GN=Mrps34 PE=1 SV=1	5		NaN	NaN	15.0001	NaN	NaN	NaN	5	5	34.4	15.0001	0	0	0	0	0	0	0
Q9Z0W3	Nuclear pore complex protein Nup160	Nup160	Nuclear pore complex protein Nup160 OS=Mus musculus OX=10090 GN=Nup160 PE=1 SV=2	2		NaN	NaN	NaN	NaN	NaN	NaN	2	2	1.6	0	0	0	0	0	0	0	0
Q9Z1N2	Origin recognition complex subunit 1	Orc1	Origin recognition complex subunit 1 OS=Mus musculus OX=10090 GN=Orc1 PE=1 SV=2	2		NaN	NaN	NaN	17.1697	NaN	NaN	2	2	3.2	17.1697	0	0	0	0	0	0	0
Q61584	Fragile X mental retardation syndrome-related protein 1	Fxr1	Fragile X mental retardation syndrome-related protein 1 OS=Mus musculus OX=10090 GN=Fxr1 PE=1 SV=2	7		19.9913	20.057	19.992	20.0604	19.8296	20.2247	7	6	16.8	120.155	11	0	2	2	4	1	2
P47962	60S ribosomal protein L5	Rpl5	60S ribosomal protein L5 OS=Mus musculus OX=10090 GN=Rpl5 PE=1 SV=3	3		19.9396	21.1294	20.4388	20.7477	20.2641	20.8287	3	3	12.5	123.348	6	0	1	2	1	0	2
O35685	Nuclear migration protein nudC	Nudc	Nuclear migration protein nudC OS=Mus musculus OX=10090 GN=Nudc PE=1 SV=1	11		22.056	21.9955	21.8413	21.1828	22.2521	21.8268	11	11	37.3	131.154	28	4	3	7	4	5	5
Q08288	Cell growth-regulating nucleolar protein	Lyar	Cell growth-regulating nucleolar protein OS=Mus musculus OX=10090 GN=Lyar PE=1 SV=2	2		NaN	18.2012	18.7988	19.1017	18.2764	18.1562	2	2	9.3	92.5343	1	0	0	0	1	0	0
Q922P9	Putative oxidoreductase GLYR1	Glyr1	Putative oxidoreductase GLYR1 OS=Mus musculus OX=10090 GN=Glyr1 PE=1 SV=1	2		19.3639	18.9109	19.73	19.3687	19.2276	19.1022	2	2	4.4	115.703	1	0	1	0	0	0	0
P61255	60S ribosomal protein L26	Rpl26	60S ribosomal protein L26 OS=Mus musculus OX=10090 GN=Rpl26 PE=1 SV=1	3		20.1425	21.233	20.5158	20.7925	20.7468	20.7078	3	3	12.4	124.138	3	0	1	0	0	1	1
Q9D0L8	mRNA cap guanine-N7 methyltransferase	Rnmt	mRNA cap guanine-N7 methyltransferase OS=Mus musculus OX=10090 GN=Rnmt PE=1 SV=1	4		NaN	18.0375	17.5897	NaN	NaN	18.0797	4	4	13.3	53.7069	0	0	0	0	0	0	0
P17225	Polypyrimidine tract-binding protein 1	Ptbp1	Polypyrimidine tract-binding protein 1 OS=Mus musculus OX=10090 GN=Ptbp1 PE=1 SV=2	15		21.4752	22.6311	21.815	21.4695	22.3305	21.8843	15	13	53.1	131.606	8	0	2	0	4	2	0
Q61545	RNA-binding protein EWS	Ewsr1	RNA-binding protein EWS OS=Mus musculus OX=10090 GN=Ewsr1 PE=1 SV=2	5		20.2757	20.2066	19.078	20.3544	20.5238	20.0773	5	5	9.9	120.516	2	0	0	0	1	1	0
P97855	Ras GTPase-activating protein-binding protein 1	G3bp1	Ras GTPase-activating protein-binding protein 1 OS=Mus musculus OX=10090 GN=G3bp1 PE=1 SV=1	9		19.7375	19.9894	20.2447	19.8997	19.5783	20.2841	9	8	29.7	119.734	3	0	0	1	1	0	1
P62908	40S ribosomal protein S3	Rps3	40S ribosomal protein S3 OS=Mus musculus OX=10090 GN=Rps3 PE=1 SV=1	11		22.489	22.5606	22.4307	22.4098	22.4438	22.7529	11	11	52.7	135.087	28	2	4	7	7	2	6
Q52KI8	Serine/arginine repetitive matrix protein 1	Srrm1	Serine/arginine repetitive matrix protein 1 OS=Mus musculus OX=10090 GN=Srrm1 PE=1 SV=2	2		19.4555	19.1948	18.5439	19.4338	19.7049	19.157	2	2	2.6	115.49	1	0	0	0	1	0	0
P60710;P63260	Actin, cytoplasmic 1;Actin, cytoplasmic 1, N-terminally processed;Actin, cytoplasmic 2;Actin, cytoplasmic 2, N-terminally processed	Actb;Actg1	Actin, cytoplasmic 1 OS=Mus musculus OX=10090 GN=Actb PE=1 SV=1;Actin, cytoplasmic 2 OS=Mus musculus OX=10090 GN=Actg1 PE=1 SV=1	15		25.136	25.3356	25.1568	24.8927	25.3573	25.3271	15	6	56	151.205	80	11	12	13	20	12	12
Q9QZQ8;Q8CCK0	Core histone macro-H2A.1;Core histone macro-H2A.2	H2afy;H2afy2	Core histone macro-H2A.1 OS=Mus musculus OX=10090 GN=Macroh2a1 PE=1 SV=3;Core histone macro-H2A.2 OS=Mus musculus OX=10090 GN=Macroh2a2 PE=1 SV=3	2		NaN	19.597	20.0521	21.0368	19.7045	NaN	2	2	9.9	80.3904	3	0	0	1	2	0	0
P70698;P70303	CTP synthase 1;CTP synthase 2	Ctps1;Ctps2	CTP synthase 1 OS=Mus musculus OX=10090 GN=Ctps1 PE=1 SV=2;CTP synthase 2 OS=Mus musculus OX=10090 GN=Ctps2 PE=1 SV=1	2		17.9136	17.9357	17.7231	17.5521	18.048	18.0268	2	2	4.4	107.199	0	0	0	0	0	0	0
P51410	60S ribosomal protein L9	Rpl9	60S ribosomal protein L9 OS=Mus musculus OX=10090 GN=Rpl9 PE=2 SV=2	8		21.812	21.8651	21.7652	22.1095	21.866	22.0384	8	8	52.6	131.456	23	2	2	4	8	3	4
P68040	Guanine nucleotide-binding protein subunit beta-2-like 1;Guanine nucleotide-binding protein subunit beta-2-like 1, N-terminally processed	Gnb2l1	Receptor of activated protein C kinase 1 OS=Mus musculus OX=10090 GN=Rack1 PE=1 SV=3	7		21.4424	22.1207	21.7498	21.3952	22.0177	21.7749	7	7	24.6	130.501	19	3	4	1	4	2	5
P09405	Nucleolin	Ncl	Nucleolin OS=Mus musculus OX=10090 GN=Ncl PE=1 SV=2	21		21.7822	21.8308	22.4863	22.7104	21.806	22.044	21	21	28.7	132.66	39	1	5	11	12	5	5
P63038	60 kDa heat shock protein, mitochondrial	Hspd1	60 kDa heat shock protein, mitochondrial OS=Mus musculus OX=10090 GN=Hspd1 PE=1 SV=1	9		20.3935	20.9128	20.2748	20.0036	20.835	20.7106	9	9	25.5	123.13	12	0	4	2	3	2	1
P16460	Argininosuccinate synthase	Ass1	Argininosuccinate synthase OS=Mus musculus OX=10090 GN=Ass1 PE=1 SV=1	3		19.6646	19.7845	19.7102	19.5671	19.8554	19.8348	3	3	10.7	118.417	0	0	0	0	0	0	0
Q60972	Histone-binding protein RBBP4	Rbbp4	Histone-binding protein RBBP4 OS=Mus musculus OX=10090 GN=Rbbp4 PE=1 SV=5	3		18.5721	19.0365	20.7823	20.4308	18.543	19.3267	3	3	14.8	116.691	4	0	0	1	2	1	0
Q8BTI8	Serine/arginine repetitive matrix protein 2	Srrm2	Serine/arginine repetitive matrix protein 2 OS=Mus musculus OX=10090 GN=Srrm2 PE=1 SV=3	5		19.6602	19.8859	19.3311	19.714	NaN	19.9044	5	5	3	98.4955	1	0	1	0	0	0	0
Q9CY66	H/ACA ribonucleoprotein complex subunit 1	Gar1	H/ACA ribonucleoprotein complex subunit 1 OS=Mus musculus OX=10090 GN=Gar1 PE=1 SV=1	2		18.389	18.5727	NaN	19.1621	18.7115	18.5198	2	2	7.8	93.3551	0	0	0	0	0	0	0
Q61990	Poly(rC)-binding protein 2	Pcbp2	Poly(rC)-binding protein 2 OS=Mus musculus OX=10090 GN=Pcbp2 PE=1 SV=1	8		20.6232	21.0037	20.6241	20.2512	20.9988	20.8987	8	7	39	124.4	14	1	2	3	3	2	3
O35286	Pre-mRNA-splicing factor ATP-dependent RNA helicase DHX15	Dhx15	Pre-mRNA-splicing factor ATP-dependent RNA helicase DHX15 OS=Mus musculus OX=10090 GN=Dhx15 PE=1 SV=2	11		20.2414	20.6634	20.8678	20.7182	20.7394	20.4434	11	11	17.6	123.674	6	0	0	2	3	0	1
Q921M3	Splicing factor 3B subunit 3	Sf3b3	Splicing factor 3B subunit 3 OS=Mus musculus OX=10090 GN=Sf3b3 PE=1 SV=1	3		17.9035	18.4863	18.1356	17.9858	18.3136	18.3793	3	3	3.2	109.204	0	0	0	0	0	0	0
Q61696;P17879	Heat shock 70 kDa protein 1A;Heat shock 70 kDa protein 1B	Hspa1a;Hspa1b	Heat shock 70 kDa protein 1A OS=Mus musculus OX=10090 GN=Hspa1a PE=1 SV=2;Heat shock 70 kDa protein 1B OS=Mus musculus OX=10090 GN=Hspa1b PE=1 SV=3	4		21.4987	19.7759	19.635	18.1224	21.3465	20.2407	8	4	25.6	120.619	8	3	1	1	0	2	1
P35922	Fragile X mental retardation protein 1 homolog	Fmr1	Synaptic functional regulator FMR1 OS=Mus musculus OX=10090 GN=Fmr1 PE=1 SV=1	2		NaN	18.1489	18.1262	18.4228	18.3153	18.2997	3	1	6.8	91.3129	0	0	0	0	0	0	0
Q8BKC5	Importin-5	Ipo5	Importin-5 OS=Mus musculus OX=10090 GN=Ipo5 PE=1 SV=3	3		18.3188	18.112	18.372	18.0386	18.4042	18.3581	3	3	4	109.604	0	0	0	0	0	0	0
Q5SWD9	Pre-rRNA-processing protein TSR1 homolog	Tsr1	Pre-rRNA-processing protein TSR1 homolog OS=Mus musculus OX=10090 GN=Tsr1 PE=1 SV=1	2		17.2512	17.5999	17.6671	17.778	NaN	17.5921	2	2	3.5	87.8884	0	0	0	0	0	0	0
Q6P4T2	U5 small nuclear ribonucleoprotein 200 kDa helicase	Snrnp200	U5 small nuclear ribonucleoprotein 200 kDa helicase OS=Mus musculus OX=10090 GN=Snrnp200 PE=1 SV=1	23		21.4347	21.2874	21.4216	21.1727	21.7305	21.3273	23	23	15.3	128.374	41	3	5	11	10	6	6
P80316	T-complex protein 1 subunit epsilon	Cct5	T-complex protein 1 subunit epsilon OS=Mus musculus OX=10090 GN=Cct5 PE=1 SV=1	3		19.6289	20.0374	20.2084	19.57	19.9758	20.0426	3	3	10.4	119.463	1	0	0	1	0	0	0
P11440	Cyclin-dependent kinase 1	Cdk1	Cyclin-dependent kinase 1 OS=Mus musculus OX=10090 GN=Cdk1 PE=1 SV=3	4		19.758	18.3352	19.0006	18.8928	19.3184	19.1272	4	4	18.5	114.432	0	0	0	0	0	0	0
Q62189	U1 small nuclear ribonucleoprotein A	Snrpa	U1 small nuclear ribonucleoprotein A OS=Mus musculus OX=10090 GN=Snrpa PE=1 SV=3	5		20.7024	19.5251	20.3171	20.0026	20.2445	20.3631	5	5	28.9	121.155	2	0	0	1	1	0	0
P28656	Nucleosome assembly protein 1-like 1	Nap1l1	Nucleosome assembly protein 1-like 1 OS=Mus musculus OX=10090 GN=Nap1l1 PE=1 SV=2	3		19.7792	19.7726	19.7113	19.8818	20.2272	19.7286	3	3	11.8	119.101	0	0	0	0	0	0	0
Q9CY58	Plasminogen activator inhibitor 1 RNA-binding protein	Serbp1	Plasminogen activator inhibitor 1 RNA-binding protein OS=Mus musculus OX=10090 GN=Serbp1 PE=1 SV=2	2		21.0204	20.9133	21.867	21.8783	20.9494	21.4144	2	2	6.9	128.043	5	1	0	1	1	1	1
Q99NB9	Splicing factor 3B subunit 1	Sf3b1	Splicing factor 3B subunit 1 OS=Mus musculus OX=10090 GN=Sf3b1 PE=1 SV=1	12		18.1204	19.3701	19.3811	19.1796	18.6773	19.285	12	12	14	114.014	1	0	0	1	0	0	0
P28658	Ataxin-10	Atxn10	Ataxin-10 OS=Mus musculus OX=10090 GN=Atxn10 PE=1 SV=2	3		18.0572	NaN	NaN	17.7327	18.2829	18.3188	3	3	6.7	72.3917	0	0	0	0	0	0	0
P62911	60S ribosomal protein L32	Rpl32	60S ribosomal protein L32 OS=Mus musculus OX=10090 GN=Rpl32 PE=1 SV=2	2		NaN	18.3635	18.3208	18.719	18.6144	NaN	2	2	11.1	74.0178	1	0	0	0	1	0	0
Q8VEE4	Replication protein A 70 kDa DNA-binding subunit;Replication protein A 70 kDa DNA-binding subunit, N-terminally processed	Rpa1	Replication protein A 70 kDa DNA-binding subunit OS=Mus musculus OX=10090 GN=Rpa1 PE=1 SV=1	5		20.2994	20.5187	20.5049	20.2666	20.6471	20.673	5	5	11.4	122.91	7	1	0	2	2	1	1
Q9CWR8	DNA (cytosine-5)-methyltransferase 3-like	Dnmt3l	DNA (cytosine-5)-methyltransferase 3-like OS=Mus musculus OX=10090 GN=Dnmt3l PE=1 SV=1	5		20.0949	19.9103	20.4678	20.3942	20.4037	20.1127	5	5	13.8	121.384	2	0	0	1	1	0	0
Q9CXW4	60S ribosomal protein L11	Rpl11	60S ribosomal protein L11 OS=Mus musculus OX=10090 GN=Rpl11 PE=1 SV=4	6		22.1882	22.2574	22.146	22.2325	22.3404	22.6173	6	6	41	133.782	9	1	1	2	3	0	2
C0HKE6;C0HKE1;C0HKE7;C0HKE2;C0HKE3;C0HKE4;C0HKE5;C0HKE9;C0HKE8;Q8BFU2;Q8CGP7;Q8CGP5;Q8CGP6;Q6GSS7;Q8R1M2;Q64523;P27661	Histone H2A type 3;Histone H2A type 1-K;Histone H2A type 1-F;Histone H2A type 1-H;Histone H2A type 2-A;Histone H2A.J;Histone H2A type 2-C;Histone H2AX	Hist3h2a;Hist1h2ak;Hist1h2af;Hist1h2ah;Hist2h2aa1;H2afj;Hist2h2ac;H2afx	Histone H2A type 1-I OS=Mus musculus OX=10090 GN=H2ac13 PE=1 SV=1;Histone H2A type 1-B OS=Mus musculus OX=10090 GN=H2ac4 PE=1 SV=1;Histone H2A type 1-N OS=Mus musculus OX=10090 GN=Hist1h2an PE=1 SV=1;Histone H2A type 1-C OS=Mus musculus OX=10090 GN=H2ac6 P	3		23.8294	23.6354	24.8749	25.4163	24.3314	23.6455	3	1	26.9	145.733	13	1	2	4	2	2	2
Q9JIK5	Nucleolar RNA helicase 2	Ddx21	Nucleolar RNA helicase 2 OS=Mus musculus OX=10090 GN=Ddx21 PE=1 SV=3	20		20.633	20.9711	21.5849	21.6079	20.8984	21.2244	20	20	30.1	126.92	15	0	0	6	7	0	2
P10126;P62631	Elongation factor 1-alpha 1;Elongation factor 1-alpha 2	Eef1a1;Eef1a2	Elongation factor 1-alpha 1 OS=Mus musculus OX=10090 GN=Eef1a1 PE=1 SV=3;Elongation factor 1-alpha 2 OS=Mus musculus OX=10090 GN=Eef1a2 PE=1 SV=1	10		23.6479	24.1077	23.4604	23.3215	24.1173	24.1763	10	10	32	142.831	54	7	8	11	10	8	10
Q99JN2	Kelch-like protein 22	Klhl22	Kelch-like protein 22 OS=Mus musculus OX=10090 GN=Klhl22 PE=1 SV=1	6		21.4481	18.331	20.2281	19.9628	20.2704	20.0908	6	6	11.8	120.331	7	3	0	2	2	0	0
B2RY56	RNA-binding protein 25	Rbm25	RNA-binding protein 25 OS=Mus musculus OX=10090 GN=Rbm25 PE=1 SV=2	2		18.6097	18.5429	18.5534	18.6821	18.884	18.8641	2	2	3.8	112.136	0	0	0	0	0	0	0
Q9CQN1	Heat shock protein 75 kDa, mitochondrial	Trap1	Heat shock protein 75 kDa, mitochondrial OS=Mus musculus OX=10090 GN=Trap1 PE=1 SV=1	4		19.2518	19.5683	19.5584	19.4667	19.7288	19.688	4	4	7.4	117.262	2	0	0	0	2	0	0
O35658	Complement component 1 Q subcomponent-binding protein, mitochondrial	C1qbp	Complement component 1 Q subcomponent-binding protein, mitochondrial OS=Mus musculus OX=10090 GN=C1qbp PE=1 SV=1	2		NaN	19.9947	22.3359	21.9657	20.2959	NaN	2	2	9.7	84.5921	6	0	0	2	2	1	1
Q01320	DNA topoisomerase 2-alpha	Top2a	DNA topoisomerase 2-alpha OS=Mus musculus OX=10090 GN=Top2a PE=1 SV=2	25		21.7732	22.3918	22.9938	22.9637	22.3872	22.3831	25	25	20.7	134.893	56	2	8	12	21	6	7
Q8BU30	Isoleucine--tRNA ligase, cytoplasmic	Iars	Isoleucine--tRNA ligase, cytoplasmic OS=Mus musculus OX=10090 GN=Iars1 PE=1 SV=2	3		18.887	19.0855	18.7842	18.807	19.048	19.5389	3	3	3.3	114.151	1	0	0	0	0	0	1
P62245	40S ribosomal protein S15a	Rps15a	40S ribosomal protein S15a OS=Mus musculus OX=10090 GN=Rps15a PE=1 SV=2	3		21.4252	21.5256	21.6641	21.9036	21.6439	21.9218	3	3	33.1	130.084	14	3	2	2	3	2	2
Q8CCS6	Polyadenylate-binding protein 2	Pabpn1	Polyadenylate-binding protein 2 OS=Mus musculus OX=10090 GN=Pabpn1 PE=1 SV=3	5		17.5365	18.8652	18.408	18.3508	NaN	18.519	5	5	29.8	91.6795	0	0	0	0	0	0	0
P61222	ATP-binding cassette sub-family E member 1	Abce1	ATP-binding cassette sub-family E member 1 OS=Mus musculus OX=10090 GN=Abce1 PE=1 SV=1	3		19.2752	19.4721	19.5873	19.1861	19.4035	19.9911	3	3	7	116.915	2	0	0	0	1	0	1
Q9R190;Q924K8;Q8K4B0	Metastasis-associated protein MTA2;Metastasis-associated protein MTA3;Metastasis-associated protein MTA1	Mta2;Mta3;Mta1	Metastasis-associated protein MTA2 OS=Mus musculus OX=10090 GN=Mta2 PE=1 SV=1;Metastasis-associated protein MTA3 OS=Mus musculus OX=10090 GN=Mta3 PE=1 SV=1;Metastasis-associated protein MTA1 OS=Mus musculus OX=10090 GN=Mta1 PE=1 SV=1	2		NaN	18.5063	18.1352	18.6194	18.8501	18.811	2	2	3	92.922	0	0	0	0	0	0	0
Q587J6	LINE-1 type transposase domain-containing protein 1	L1td1	LINE-1 type transposase domain-containing protein 1 OS=Mus musculus OX=10090 GN=L1td1 PE=2 SV=1	7		19.6369	20.303	20.6646	20.6756	20.2955	20.2934	7	7	11.3	121.869	12	0	2	5	2	1	2
Q9EPU0	Regulator of nonsense transcripts 1	Upf1	Regulator of nonsense transcripts 1 OS=Mus musculus OX=10090 GN=Upf1 PE=1 SV=2	18		18.0906	19.1618	19.0521	18.9202	18.7157	19.188	18	18	20	113.128	0	0	0	0	0	0	0
Q8C854	Myelin expression factor 2	Myef2	Myelin expression factor 2 OS=Mus musculus OX=10090 GN=Myef2 PE=1 SV=1	19		16.6657	17.7816	16.3433	17.9376	17.565	17.5483	19	19	41.6	103.841	0	0	0	0	0	0	0
Q920B9	FACT complex subunit SPT16	Supt16h	FACT complex subunit SPT16 OS=Mus musculus OX=10090 GN=Supt16h PE=1 SV=2	6		NaN	18.671	21.0037	19.9144	NaN	19.0205	6	6	8.2	78.6096	6	0	0	4	2	0	0
P11983	T-complex protein 1 subunit alpha	Tcp1	T-complex protein 1 subunit alpha OS=Mus musculus OX=10090 GN=Tcp1 PE=1 SV=3	12		22.1318	21.8909	21.9784	21.9877	22.2698	22.4745	12	12	26.3	132.733	20	2	1	6	5	2	4
Q9DCL9	Multifunctional protein ADE2;Phosphoribosylaminoimidazole-succinocarboxamide synthase;Phosphoribosylaminoimidazole carboxylase	Paics	Multifunctional protein ADE2 OS=Mus musculus OX=10090 GN=Paics PE=1 SV=4	2		18.3561	18.2646	18.3634	18.212	18.6241	18.7237	2	2	5.2	110.544	0	0	0	0	0	0	0
P52479	Ubiquitin carboxyl-terminal hydrolase 10	Usp10	Ubiquitin carboxyl-terminal hydrolase 10 OS=Mus musculus OX=10090 GN=Usp10 PE=1 SV=3	3		18.8602	19.3542	19.7074	19.1791	19.5764	19.3757	3	3	5.3	116.053	1	0	0	0	1	0	0
Q99JB2	Stomatin-like protein 2, mitochondrial	Stoml2	Stomatin-like protein 2, mitochondrial OS=Mus musculus OX=10090 GN=Stoml2 PE=1 SV=1	2		19.1477	19.7504	19.6812	18.4816	20.1473	19.4893	2	2	8.2	116.697	5	0	2	1	0	1	1
P62827	GTP-binding nuclear protein Ran	Ran	GTP-binding nuclear protein Ran OS=Mus musculus OX=10090 GN=Ran PE=1 SV=3	7		22.5574	22.2523	22.6072	22.5316	22.6427	22.928	7	7	38.4	135.519	23	2	4	5	5	4	3
Q64213	Splicing factor 1	Sf1	Splicing factor 1 OS=Mus musculus OX=10090 GN=Sf1 PE=1 SV=6	7		17.8619	18.0889	17.5077	18.2154	17.9524	18.7702	7	7	15.2	108.396	0	0	0	0	0	0	0
Q99L45	Eukaryotic translation initiation factor 2 subunit 2	Eif2s2	Eukaryotic translation initiation factor 2 subunit 2 OS=Mus musculus OX=10090 GN=Eif2s2 PE=1 SV=1	4		19.5432	18.9556	19.773	19.988	19.686	19.5886	4	4	16	117.534	1	0	0	0	1	0	0
P60335	Poly(rC)-binding protein 1	Pcbp1	Poly(rC)-binding protein 1 OS=Mus musculus OX=10090 GN=Pcbp1 PE=1 SV=1	5		20.8819	20.9606	20.6225	21.4887	21.3322	21.2954	6	5	26.4	126.581	8	0	1	2	3	1	1
Q3U9G9	Lamin-B receptor	Lbr	Delta(14)-sterol reductase LBR OS=Mus musculus OX=10090 GN=Lbr PE=1 SV=2	3		19.5778	19.8236	19.8794	20.398	20.4411	19.7576	3	3	6.1	119.877	3	0	0	1	1	1	0
Q922D8	C-1-tetrahydrofolate synthase, cytoplasmic;Methylenetetrahydrofolate dehydrogenase;Methenyltetrahydrofolate cyclohydrolase;Formyltetrahydrofolate synthetase;C-1-tetrahydrofolate synthase, cytoplasmic, N-terminally processed	Mthfd1	C-1-tetrahydrofolate synthase, cytoplasmic OS=Mus musculus OX=10090 GN=Mthfd1 PE=1 SV=4	2		19.4561	19.5121	NaN	NaN	19.7699	20.0089	2	2	3	78.747	2	0	1	0	0	0	1
Q9QWT9	Kinesin-like protein KIFC1	Kifc1	Kinesin-like protein KIFC1 OS=Mus musculus OX=10090 GN=Kifc1 PE=1 SV=2	2		NaN	18.3813	18.6628	18.8257	18.9466	18.6307	2	2	3.7	93.447	3	0	0	0	2	0	1
Q60932	Voltage-dependent anion-selective channel protein 1	Vdac1	Voltage-dependent anion-selective channel protein 1 OS=Mus musculus OX=10090 GN=Vdac1 PE=1 SV=3	2		18.1184	20.1235	19.424	19.4035	19.066	20.0065	2	2	8.1	116.142	3	0	0	1	1	0	1
Q9JJI8	60S ribosomal protein L38	Rpl38	60S ribosomal protein L38 OS=Mus musculus OX=10090 GN=Rpl38 PE=1 SV=3	3		20.6861	19.5971	21.8152	21.164	20.7048	20.4187	3	3	35.7	124.386	2	0	1	1	0	0	0
P80318	T-complex protein 1 subunit gamma	Cct3	T-complex protein 1 subunit gamma OS=Mus musculus OX=10090 GN=Cct3 PE=1 SV=1	13		26.4079	26.7071	26.3687	26.2876	26.9875	26.968	13	13	29.2	159.727	30	2	6	6	4	5	7
Q9EQ61	Pescadillo homolog	Pes1	Pescadillo homolog OS=Mus musculus OX=10090 GN=Pes1 PE=1 SV=1	2		17.8198	17.9535	18.3605	18.4923	18.4184	18.2378	2	2	4.5	109.282	0	0	0	0	0	0	0
Q9DBR1	5-3 exoribonuclease 2	Xrn2	5-3 exoribonuclease 2 OS=Mus musculus OX=10090 GN=Xrn2 PE=1 SV=1	9		18.1627	17.0044	15.7638	18.0333	17.7784	18.2885	9	9	14.5	105.031	0	0	0	0	0	0	0
P84084;P84078;P61205;P61750;Q8BSL7	ADP-ribosylation factor 5;ADP-ribosylation factor 1;ADP-ribosylation factor 3;ADP-ribosylation factor 4;ADP-ribosylation factor 2	Arf5;Arf1;Arf3;Arf4;Arf2	ADP-ribosylation factor 5 OS=Mus musculus OX=10090 GN=Arf5 PE=1 SV=2;ADP-ribosylation factor 1 OS=Mus musculus OX=10090 GN=Arf1 PE=1 SV=2;ADP-ribosylation factor 3 OS=Mus musculus OX=10090 GN=Arf3 PE=2 SV=2;ADP-ribosylation factor 4 OS=Mus musculus OX=1009	2		19.4691	19.6065	19.8597	19.6644	19.9933	19.9995	2	2	11.7	118.592	1	0	0	0	0	0	1
Q60649	Caseinolytic peptidase B protein homolog	Clpb	Caseinolytic peptidase B protein homolog OS=Mus musculus OX=10090 GN=Clpb PE=1 SV=1	3		19.6269	18.4223	20.271	19.0236	19.6157	19.355	3	3	6.8	116.315	3	0	0	3	0	0	0
E9Q5C9		Nolc1	Nucleolar and coiled-body phosphoprotein 1 OS=Mus musculus OX=10090 GN=Nolc1 PE=1 SV=1	2		17.7348	NaN	18.9202	18.5689	18.4178	17.9755	2	2	3.6	91.6172	0	0	0	0	0	0	0
Q9ESZ8	General transcription factor II-I	Gtf2i	General transcription factor II-I OS=Mus musculus OX=10090 GN=Gtf2i PE=1 SV=3	10		20.5977	20.3635	20.8485	20.0063	20.794	21.0994	10	10	16.2	123.709	11	0	1	5	2	2	1
Q9R0L7	A-kinase anchor protein 8-like	Akap8l	A-kinase anchor protein 8-like OS=Mus musculus OX=10090 GN=Akap8l PE=1 SV=1	2		15.7831	17.0984	16.4799	NaN	17.1872	16.6269	2	2	4	83.1754	0	0	0	0	0	0	0
Q9Z0N1;Q9Z0N2	Eukaryotic translation initiation factor 2 subunit 3, X-linked;Eukaryotic translation initiation factor 2 subunit 3, Y-linked	Eif2s3x;Eif2s3y	Eukaryotic translation initiation factor 2 subunit 3, X-linked OS=Mus musculus OX=10090 GN=Eif2s3x PE=1 SV=2;Eukaryotic translation initiation factor 2 subunit 3, Y-linked OS=Mus musculus OX=10090 GN=Eif2s3y PE=1 SV=2	8		20.1173	20.2197	20.4974	20.2665	20.8984	20.3895	8	8	28.8	122.389	6	0	0	2	2	1	1
P68372;Q9D6F9	Tubulin beta-4B chain;Tubulin beta-4A chain	Tubb4b;Tubb4a	Tubulin beta-4B chain OS=Mus musculus OX=10090 GN=Tubb4b PE=1 SV=1;Tubulin beta-4A chain OS=Mus musculus OX=10090 GN=Tubb4a PE=1 SV=3	3		20.8632	20.436	20.4983	20.3034	21.1192	21.1325	15	2	44.5	124.353	10	1	1	2	2	2	2
Q9R1T2	SUMO-activating enzyme subunit 1;SUMO-activating enzyme subunit 1, N-terminally processed	Sae1	SUMO-activating enzyme subunit 1 OS=Mus musculus OX=10090 GN=Sae1 PE=1 SV=1	2		NaN	18.1084	18.5244	18.6045	18.5926	18.5832	2	2	11.4	92.4131	0	0	0	0	0	0	0
Q922B2	Aspartate--tRNA ligase, cytoplasmic	Dars	Aspartate--tRNA ligase, cytoplasmic OS=Mus musculus OX=10090 GN=Dars1 PE=1 SV=2	2		19.9423	20.2042	20.2386	20.0253	20.4445	20.6686	2	2	6.4	121.524	3	0	0	0	2	0	1
Q00PI9	Heterogeneous nuclear ribonucleoprotein U-like protein 2	Hnrnpul2	Heterogeneous nuclear ribonucleoprotein U-like protein 2 OS=Mus musculus OX=10090 GN=Hnrnpul2 PE=1 SV=2	13		16.4546	17.8559	17.5588	17.6674	18.5331	16.7521	13	13	23	104.822	0	0	0	0	0	0	0
Q8VIJ6	Splicing factor, proline- and glutamine-rich	Sfpq	Splicing factor, proline- and glutamine-rich OS=Mus musculus OX=10090 GN=Sfpq PE=1 SV=1	15		21.1719	21.5212	21.1591	21.3651	21.7343	21.937	15	14	27	128.889	18	1	3	2	6	3	3
Q9DAW6	U4/U6 small nuclear ribonucleoprotein Prp4	Prpf4	U4/U6 small nuclear ribonucleoprotein Prp4 OS=Mus musculus OX=10090 GN=Prpf4 PE=1 SV=1	2		18.4249	18.1568	18.581	18.8161	18.6846	18.8765	2	2	5.4	111.54	1	0	0	0	1	0	0
Q9DBY8	Nuclear valosin-containing protein-like	Nvl	Nuclear valosin-containing protein-like OS=Mus musculus OX=10090 GN=Nvl PE=1 SV=1	8		20.3468	20.212	20.6062	19.9439	20.9971	20.5582	8	8	14.2	122.664	16	2	2	4	2	2	4
Q01853	Transitional endoplasmic reticulum ATPase	Vcp	Transitional endoplasmic reticulum ATPase OS=Mus musculus OX=10090 GN=Vcp PE=1 SV=4	3		18.7042	18.8752	18.8396	18.4814	19.3801	19.2425	3	3	5	113.523	1	0	0	0	0	0	1
Q99LC2	Cleavage stimulation factor subunit 1	Cstf1	Cleavage stimulation factor subunit 1 OS=Mus musculus OX=10090 GN=Cstf1 PE=1 SV=1	2		NaN	18.1332	18.3468	17.4667	18.9243	18.3932	2	2	7.7	91.2643	0	0	0	0	0	0	0
P52480	Pyruvate kinase PKM	Pkm	Pyruvate kinase PKM OS=Mus musculus OX=10090 GN=Pkm PE=1 SV=4	21		22.0173	22.8377	22.2551	22.0037	22.9767	22.9389	21	21	46	135.029	55	6	9	11	11	8	10
Q99KP6	Pre-mRNA-processing factor 19	Prpf19	Pre-mRNA-processing factor 19 OS=Mus musculus OX=10090 GN=Prpf19 PE=1 SV=1	5		19.2723	19.3563	20.094	19.4588	20.1607	19.5287	5	5	15.1	117.871	1	0	0	0	0	1	0
P56480	ATP synthase subunit beta, mitochondrial	Atp5b	ATP synthase subunit beta, mitochondrial OS=Mus musculus OX=10090 GN=Atp5f1b PE=1 SV=2	8		19.9774	20.6039	20.5473	20.4087	20.9671	20.6871	8	8	20.8	123.192	15	0	1	3	3	3	5
Q61937	Nucleophosmin	Npm1	Nucleophosmin OS=Mus musculus OX=10090 GN=Npm1 PE=1 SV=1	8		22.3835	22.7881	24.0404	23.9094	23.0558	23.2066	8	8	33.9	139.384	25	2	2	6	7	4	4
Q9CZN7	Serine hydroxymethyltransferase	Shmt2	Serine hydroxymethyltransferase, mitochondrial OS=Mus musculus OX=10090 GN=Shmt2 PE=1 SV=1	2		18.8858	NaN	19.9574	20.6414	19.2734	19.5935	2	2	6.3	98.3516	3	0	0	1	1	0	1
Q61316	Heat shock 70 kDa protein 4	Hspa4	Heat shock 70 kDa protein 4 OS=Mus musculus OX=10090 GN=Hspa4 PE=1 SV=1	2		NaN	18.2271	19.5688	18.8541	18.8191	18.7523	2	2	3.3	94.2214	2	0	0	1	1	0	0
Q8K3F7	L-threonine 3-dehydrogenase, mitochondrial	Tdh	L-threonine 3-dehydrogenase, mitochondrial OS=Mus musculus OX=10090 GN=Tdh PE=1 SV=1	8		21.1898	20.8456	21.3146	21.1683	21.5632	21.5986	8	8	39.1	127.68	21	3	3	3	1	4	7
Q61753	D-3-phosphoglycerate dehydrogenase	Phgdh	D-3-phosphoglycerate dehydrogenase OS=Mus musculus OX=10090 GN=Phgdh PE=1 SV=3	2		17.3303	17.5605	17.3629	17.3304	18.0583	17.972	2	2	4.3	105.614	0	0	0	0	0	0	0
Q9WTM5	RuvB-like 2	Ruvbl2	RuvB-like 2 OS=Mus musculus OX=10090 GN=Ruvbl2 PE=1 SV=3	6		20.0262	19.8617	20.3732	19.9281	20.5311	20.5007	6	6	17.1	121.221	20	1	3	5	3	2	6
P57784	U2 small nuclear ribonucleoprotein A	Snrpa1	U2 small nuclear ribonucleoprotein A OS=Mus musculus OX=10090 GN=Snrpa1 PE=1 SV=2	3		18.1825	18.1166	18.4481	18.3871	18.7561	18.7094	3	3	22	110.6	0	0	0	0	0	0	0
Q8C2Q3	RNA-binding protein 14	Rbm14	RNA-binding protein 14 OS=Mus musculus OX=10090 GN=Rbm14 PE=1 SV=1	15		16.7748	17.1347	17.4069	17.5832	17.3472	17.7306	15	15	28.8	103.977	0	0	0	0	0	0	0
P62984;P62983;P0CG49;P0CG50	Ubiquitin-60S ribosomal protein L40;Ubiquitin;60S ribosomal protein L40;Ubiquitin-40S ribosomal protein S27a;Ubiquitin;40S ribosomal protein S27a;Polyubiquitin-B;Ubiquitin;Polyubiquitin-C;Ubiquitin;Ubiquitin-related 1;Ubiquitin-related 2	Uba52;Rps27a;Ubb;Ubc	Ubiquitin-60S ribosomal protein L40 OS=Mus musculus OX=10090 GN=Uba52 PE=1 SV=2;Ubiquitin-40S ribosomal protein S27a OS=Mus musculus OX=10090 GN=Rps27a PE=1 SV=2;Polyubiquitin-B OS=Mus musculus OX=10090 GN=Ubb PE=2 SV=1;Polyubiquitin-C OS=Mus musculus OX=1	2		20.324	20.234	20.1085	20.0088	20.7673	20.9746	2	2	19.5	122.417	4	0	0	1	1	0	2
P23249	Putative helicase MOV-10	Mov10	Putative helicase MOV-10 OS=Mus musculus OX=10090 GN=Mov10 PE=1 SV=2	18		21.4987	21.8673	22.3519	21.9102	22.6204	21.9343	18	18	24.7	132.183	36	2	2	10	11	7	4
CON__P02768-1				2	+	21.2573	20.2024	22.0317	20.523	22.122	20.5272	6	2	8.4	126.664	9	1	1	3	2	1	1
P60122	RuvB-like 1	Ruvbl1	RuvB-like 1 OS=Mus musculus OX=10090 GN=Ruvbl1 PE=1 SV=1	10		21.2642	21.127	21.7347	21.4426	21.9304	21.7144	10	10	32.5	129.213	10	0	0	2	4	3	1
Q7TPV4	Myb-binding protein 1A	Mybbp1a	Myb-binding protein 1A OS=Mus musculus OX=10090 GN=Mybbp1a PE=1 SV=2	24		20.1391	21.0537	21.7866	21.713	21.3397	21.1536	24	24	26.4	127.186	43	0	3	12	19	1	8
Q9CW46	Ribonucleoprotein PTB-binding 1	Raver1	Ribonucleoprotein PTB-binding 1 OS=Mus musculus OX=10090 GN=Raver1 PE=1 SV=2	2		NaN	16.9849	17.0949	17.188	17.5893	17.6841	2	2	4.3	86.5412	0	0	0	0	0	0	0
P99024	Tubulin beta-5 chain	Tubb5	Tubulin beta-5 chain OS=Mus musculus OX=10090 GN=Tubb5 PE=1 SV=1	17		24.2083	24.1839	24.2388	24.0158	24.8825	24.8248	17	4	51.8	146.354	61	5	9	13	13	10	11
Q9D0E1	Heterogeneous nuclear ribonucleoprotein M	Hnrnpm	Heterogeneous nuclear ribonucleoprotein M OS=Mus musculus OX=10090 GN=Hnrnpm PE=1 SV=3	29		25.3218	25.7208	25.457	25.229	26.2382	26.1289	29	29	48	154.096	15	1	2	4	3	2	3
P42932	T-complex protein 1 subunit theta	Cct8	T-complex protein 1 subunit theta OS=Mus musculus OX=10090 GN=Cct8 PE=1 SV=3	14		20.5754	20.5003	20.6377	20.5643	21.1884	21.2311	14	14	31.2	124.697	26	1	2	5	6	6	6
Q99K48	Non-POU domain-containing octamer-binding protein	Nono	Non-POU domain-containing octamer-binding protein OS=Mus musculus OX=10090 GN=Nono PE=1 SV=3	11		20.0398	20.887	19.2418	20.8998	20.8974	21.375	12	11	35.3	123.341	3	0	1	0	0	0	2
O09106;P70288	Histone deacetylase 1;Histone deacetylase 2	Hdac1;Hdac2	Histone deacetylase 1 OS=Mus musculus OX=10090 GN=Hdac1 PE=1 SV=1;Histone deacetylase 2 OS=Mus musculus OX=10090 GN=Hdac2 PE=1 SV=1	3		19.205	19.2051	19.7503	19.789	19.6186	20.1786	3	3	7.7	117.747	5	0	0	2	1	0	2
Q9WVA3	Mitotic checkpoint protein BUB3	Bub3	Mitotic checkpoint protein BUB3 OS=Mus musculus OX=10090 GN=Bub3 PE=1 SV=2	3		18.2135	18.442	18.7009	18.8148	19.0107	19.0346	3	3	13.5	112.217	1	0	0	0	1	0	0
Q9CWF2;Q7TMM9	Tubulin beta-2B chain;Tubulin beta-2A chain	Tubb2b;Tubb2a	Tubulin beta-2B chain OS=Mus musculus OX=10090 GN=Tubb2b PE=1 SV=1;Tubulin beta-2A chain OS=Mus musculus OX=10090 GN=Tubb2a PE=1 SV=1	4		NaN	19.385	NaN	NaN	19.8213	20.378	15	3	45.8	59.5843	1	0	0	0	0	1	0
P80314	T-complex protein 1 subunit beta	Cct2	T-complex protein 1 subunit beta OS=Mus musculus OX=10090 GN=Cct2 PE=1 SV=4	3		19.3979	19.5673	19.3631	NaN	20.0655	20.3298	3	3	9	98.7236	3	0	0	0	0	1	2
O35129	Prohibitin-2	Phb2	Prohibitin-2 OS=Mus musculus OX=10090 GN=Phb2 PE=1 SV=1	10		21.7005	21.8345	22.3087	21.9781	22.434	22.5319	10	10	42.1	132.788	26	1	3	6	8	3	5
Q9JIF0	Protein arginine N-methyltransferase 1	Prmt1	Protein arginine N-methyltransferase 1 OS=Mus musculus OX=10090 GN=Prmt1 PE=1 SV=1	16		20.1224	20.1056	21.8823	21.7947	20.9289	20.7397	16	16	41	125.574	11	0	1	4	5	1	0
P58252	Elongation factor 2	Eef2	Elongation factor 2 OS=Mus musculus OX=10090 GN=Eef2 PE=1 SV=2	14		20.4934	20.8993	20.8449	20.7791	21.4159	21.4213	14	13	23.4	125.854	17	0	1	5	4	3	4
Q9ERD7	Tubulin beta-3 chain	Tubb3	Tubulin beta-3 chain OS=Mus musculus OX=10090 GN=Tubb3 PE=1 SV=1	2		19.7295	19.8513	20.1403	19.5787	20.8274	20.2004	11	2	31.6	120.328	4	0	0	1	1	1	1
P68373;P05213;P68368;Q9JJZ2	Tubulin alpha-1C chain;Tubulin alpha-1B chain;Tubulin alpha-4A chain;Tubulin alpha-8 chain	Tuba1c;Tuba1b;Tuba4a;Tuba8	Tubulin alpha-1C chain OS=Mus musculus OX=10090 GN=Tuba1c PE=1 SV=1;Tubulin alpha-1B chain OS=Mus musculus OX=10090 GN=Tuba1b PE=1 SV=2;Tubulin alpha-4A chain OS=Mus musculus OX=10090 GN=Tuba4a PE=1 SV=1;Tubulin alpha-8 chain OS=Mus musculus OX=10090 GN=Tu	13		23.7093	23.8404	24.0327	23.8186	24.623	24.386	13	1	41.2	144.41	63	10	10	10	12	10	11
Q9Z2W0	Aspartyl aminopeptidase	Dnpep	Aspartyl aminopeptidase OS=Mus musculus OX=10090 GN=Dnpep PE=1 SV=2	8		21.3432	21.0605	22.5939	21.1073	22.4874	21.3776	8	8	25.6	129.97	22	1	2	8	4	4	3
Q9EQU5	Protein SET	Set	Protein SET OS=Mus musculus OX=10090 GN=Set PE=1 SV=1	6		18.4039	18.8921	22.5927	21.0687	19.4917	19.2761	6	6	33.9	119.725	7	0	0	4	3	0	0
P51881	ADP/ATP translocase 2;ADP/ATP translocase 2, N-terminally processed	Slc25a5	ADP/ATP translocase 2 OS=Mus musculus OX=10090 GN=Slc25a5 PE=1 SV=3	11		22.7991	22.8163	23.1918	23.186	23.4229	23.6671	11	4	35.2	139.083	34	4	5	7	7	3	8
P23198;P83917	Chromobox protein homolog 3;Chromobox protein homolog 1	Cbx3;Cbx1	Chromobox protein homolog 3 OS=Mus musculus OX=10090 GN=Cbx3 PE=1 SV=2;Chromobox protein homolog 1 OS=Mus musculus OX=10090 GN=Cbx1 PE=1 SV=1	2		19.6518	19.5173	20.4923	20.6077	20.3255	20.3188	2	2	16.4	120.913	2	0	0	1	1	0	0
Q8VDP4	Cell cycle and apoptosis regulator protein 2	Ccar2	Cell cycle and apoptosis regulator protein 2 OS=Mus musculus OX=10090 GN=Ccar2 PE=1 SV=2	5		18.9108	18.6108	19.2354	18.7274	19.6404	19.3938	5	5	7	114.519	0	0	0	0	0	0	0
O08810	116 kDa U5 small nuclear ribonucleoprotein component	Eftud2	116 kDa U5 small nuclear ribonucleoprotein component OS=Mus musculus OX=10090 GN=Eftud2 PE=1 SV=1	10		19.3081	18.6824	20.0047	19.5448	19.9108	19.5953	11	10	15.9	117.046	3	0	0	1	1	1	0
Q03265	ATP synthase subunit alpha, mitochondrial	Atp5a1	ATP synthase subunit alpha, mitochondrial OS=Mus musculus OX=10090 GN=Atp5f1a PE=1 SV=1	17		22.8198	22.8371	23.2176	23.0404	23.5539	23.6286	17	17	43.8	139.097	63	6	8	12	12	11	14
Q61171	Peroxiredoxin-2	Prdx2	Peroxiredoxin-2 OS=Mus musculus OX=10090 GN=Prdx2 PE=1 SV=3	2		NaN	19.3399	19.4034	19.0582	20.6871	19.5507	2	2	14.6	98.0392	1	0	0	0	0	1	0
P67778	Prohibitin	Phb	Prohibitin OS=Mus musculus OX=10090 GN=Phb PE=1 SV=1	6		20.939	20.7209	21.4216	21.0897	21.6682	21.5599	6	6	27.2	127.399	14	1	1	3	4	2	3
P17182	Alpha-enolase	Eno1	Alpha-enolase OS=Mus musculus OX=10090 GN=Eno1 PE=1 SV=3	15		22.7947	22.9059	23.1132	22.9011	23.7269	23.5593	15	15	49.1	139.001	55	4	5	10	13	12	11
Q923G2	DNA-directed RNA polymerases I, II, and III subunit RPABC3	Polr2h	DNA-directed RNA polymerases I, II, and III subunit RPABC3 OS=Mus musculus OX=10090 GN=Polr2h PE=1 SV=3	2		18.7766	19.0249	19.675	19.3434	19.6108	19.7764	2	2	19.3	116.207	3	0	0	1	0	1	1
P13439	Uridine 5-monophosphate synthase;Orotate phosphoribosyltransferase;Orotidine 5-phosphate decarboxylase	Umps	Uridine 5-monophosphate synthase OS=Mus musculus OX=10090 GN=Umps PE=1 SV=3	3		18.3918	NaN	18.7991	18.3554	18.8013	19.5711	3	3	7.7	93.9186	1	0	0	0	0	0	1
Q9D0D4	Probable dimethyladenosine transferase	Dimt1	Probable dimethyladenosine transferase OS=Mus musculus OX=10090 GN=Dimt1 PE=2 SV=1	5		17.2971	17.304	18.1973	18.282	17.9717	18.2253	5	5	18.2	107.277	0	0	0	0	0	0	0
Q64737	Trifunctional purine biosynthetic protein adenosine-3;Phosphoribosylamine--glycine ligase;Phosphoribosylformylglycinamidine cyclo-ligase;Phosphoribosylglycinamide formyltransferase	Gart	Trifunctional purine biosynthetic protein adenosine-3 OS=Mus musculus OX=10090 GN=Gart PE=1 SV=3	5		19.1835	18.3278	19.2636	19.3263	19.2497	19.8598	5	5	7.6	115.211	4	0	0	0	1	1	2
P47915	60S ribosomal protein L29	Rpl29	60S ribosomal protein L29 OS=Mus musculus OX=10090 GN=Rpl29 PE=1 SV=2	2		20.9449	21.6888	21.5829	22.9086	21.9527	22.2832	2	2	13.8	131.361	4	0	0	1	1	1	1
Q91ZW3	SWI/SNF-related matrix-associated actin-dependent regulator of chromatin subfamily A member 5	Smarca5	SWI/SNF-related matrix-associated actin-dependent regulator of chromatin subfamily A member 5 OS=Mus musculus OX=10090 GN=Smarca5 PE=1 SV=1	7		18.815	19.07	19.9799	20.0596	19.7159	19.7718	7	7	6.5	117.412	2	0	0	1	1	0	0
P17742	Peptidyl-prolyl cis-trans isomerase A;Peptidyl-prolyl cis-trans isomerase A, N-terminally processed	Ppia	Peptidyl-prolyl cis-trans isomerase A OS=Mus musculus OX=10090 GN=Ppia PE=1 SV=2	6		21.0423	21.1763	22.0093	21.8001	21.9164	21.9116	6	6	32.9	129.856	10	1	1	2	3	1	2
O08756	3-hydroxyacyl-CoA dehydrogenase type-2	Hsd17b10	3-hydroxyacyl-CoA dehydrogenase type-2 OS=Mus musculus OX=10090 GN=Hsd17b10 PE=1 SV=4	2		NaN	18.002	18.4155	18.1164	18.8343	18.7927	2	2	12.3	92.1609	0	0	0	0	0	0	0
Q8BX22	Sal-like protein 4	Sall4	Sal-like protein 4 OS=Mus musculus OX=10090 GN=Sall4 PE=1 SV=2	5		18.424	18.324	18.9925	19.5282	18.966	19.4195	5	5	7.6	113.654	2	0	0	0	1	0	1
A2A432	Cullin-4B	Cul4b	Cullin-4B OS=Mus musculus OX=10090 GN=Cul4b PE=1 SV=1	4		19.5665	18.9145	20.0407	18.7927	19.886	20.2329	4	4	4.7	117.433	2	0	0	1	0	0	1
P16858	Glyceraldehyde-3-phosphate dehydrogenase	Gapdh	Glyceraldehyde-3-phosphate dehydrogenase OS=Mus musculus OX=10090 GN=Gapdh PE=1 SV=2	12		23.8156	24.1769	24.5144	24.3083	24.9564	24.7112	12	12	43.2	146.483	37	1	4	8	8	9	7
Q08943	FACT complex subunit SSRP1	Ssrp1	FACT complex subunit SSRP1 OS=Mus musculus OX=10090 GN=Ssrp1 PE=1 SV=2	6		18.5671	18.4737	20.5784	20.6454	18.9235	19.8065	6	6	10.3	116.995	6	0	0	2	3	0	1
P80315	T-complex protein 1 subunit delta	Cct4	T-complex protein 1 subunit delta OS=Mus musculus OX=10090 GN=Cct4 PE=1 SV=3	4		20.7597	20.9618	20.5772	20.6224	21.6803	21.734	4	4	10.4	126.335	13	0	3	1	3	4	2
Q9JMD0	BUB3-interacting and GLEBS motif-containing protein ZNF207	Znf207	BUB3-interacting and GLEBS motif-containing protein ZNF207 OS=Mus musculus OX=10090 GN=Znf207 PE=1 SV=1	2		18.82	18.2487	19.1092	19.0194	19.397	19.3697	2	2	5.1	113.964	5	0	0	1	1	1	2
Q91YQ5	Dolichyl-diphosphooligosaccharide--protein glycosyltransferase subunit 1	Rpn1	Dolichyl-diphosphooligosaccharide--protein glycosyltransferase subunit 1 OS=Mus musculus OX=10090 GN=Rpn1 PE=1 SV=1	3		18.4112	18.577	19.5974	18.4454	19.6169	19.0833	3	3	6.7	113.731	8	0	1	3	1	3	0
Q922Q4	Pyrroline-5-carboxylate reductase 2	Pycr2	Pyrroline-5-carboxylate reductase 2 OS=Mus musculus OX=10090 GN=Pycr2 PE=1 SV=1	3		19.3704	19.2033	20.3983	20.3767	19.7852	20.5162	3	3	14.4	119.65	3	0	0	1	1	0	1
P97311	DNA replication licensing factor MCM6	Mcm6	DNA replication licensing factor MCM6 OS=Mus musculus OX=10090 GN=Mcm6 PE=1 SV=1	9		19.5547	19.8009	20.3834	20.467	20.4555	20.6386	9	9	13.9	121.3	8	0	0	1	3	1	3
P97310	DNA replication licensing factor MCM2	Mcm2	DNA replication licensing factor MCM2 OS=Mus musculus OX=10090 GN=Mcm2 PE=1 SV=3	6		18.8532	19.1272	20.1663	19.7994	19.5849	20.1575	6	6	8	117.689	5	0	0	2	1	0	2
P50247	Adenosylhomocysteinase	Ahcy	Adenosylhomocysteinase OS=Mus musculus OX=10090 GN=Ahcy PE=1 SV=3	4		18.6704	18.4368	18.7474	18.402	18.7425	20.1277	4	4	11.8	113.127	1	0	0	0	0	0	1
Q6ZWU9	40S ribosomal protein S27	Rps27	40S ribosomal protein S27 OS=Mus musculus OX=10090 GN=Rps27 PE=1 SV=3	2		17.5847	21.181	21.1373	16.6157	20.2163	20.3423	2	2	14.3	117.077	3	0	1	1	1	0	0
Q9QXX4	Calcium-binding mitochondrial carrier protein Aralar2	Slc25a13	Calcium-binding mitochondrial carrier protein Aralar2 OS=Mus musculus OX=10090 GN=Slc25a13 PE=1 SV=1	2		NaN	18.755	19.8199	19.2373	NaN	19.6537	2	2	3.8	77.4659	1	0	0	0	1	0	0
P62821	Ras-related protein Rab-1A	Rab1A	Ras-related protein Rab-1A OS=Mus musculus OX=10090 GN=Rab1A PE=1 SV=3	4		20.4949	20.7888	20.9471	20.9589	21.5803	21.5291	4	4	29.3	126.299	11	1	1	2	3	2	2
P30681	High mobility group protein B2	Hmgb2	High mobility group protein B2 OS=Mus musculus OX=10090 GN=Hmgb2 PE=1 SV=3	2		18.8461	18.4838	20.3698	19.9408	19.3739	19.8038	2	2	13.8	116.818	1	0	0	0	0	0	1
P38647	Stress-70 protein, mitochondrial	Hspa9	Stress-70 protein, mitochondrial OS=Mus musculus OX=10090 GN=Hspa9 PE=1 SV=3	19		23.3991	22.6838	23.5963	23.2835	24.2819	23.6955	19	19	36.1	140.94	72	8	11	12	11	13	17
Q9EQI8	39S ribosomal protein L46, mitochondrial	Mrpl46	39S ribosomal protein L46, mitochondrial OS=Mus musculus OX=10090 GN=Mrpl46 PE=1 SV=1	3		16.2445	NaN	16.4083	16.6944	17.2056	NaN	3	3	15.5	66.5528	0	0	0	0	0	0	0
Q9R0N0	Galactokinase	Galk1	Galactokinase OS=Mus musculus OX=10090 GN=Galk1 PE=1 SV=2	3		NaN	18.4893	19.0565	18.5313	19.5694	19.3563	3	3	9.2	95.0028	3	0	0	0	2	0	1
P63017	Heat shock cognate 71 kDa protein	Hspa8	Heat shock cognate 71 kDa protein OS=Mus musculus OX=10090 GN=Hspa8 PE=1 SV=1	22		22.4696	22.3849	23.471	23.1708	23.4477	23.3632	22	17	40.4	138.307	84	8	7	17	20	17	15
P11499	Heat shock protein HSP 90-beta	Hsp90ab1	Heat shock protein HSP 90-beta OS=Mus musculus OX=10090 GN=Hsp90ab1 PE=1 SV=3	16		21.3121	22.3814	21.4901	21.6876	22.7437	22.9084	26	16	43.6	132.523	30	1	3	5	6	6	9
P63158	High mobility group protein B1	Hmgb1	High mobility group protein B1 OS=Mus musculus OX=10090 GN=Hmgb1 PE=1 SV=2	2		NaN	18.6436	20.4557	20.1814	19.681	19.5921	2	2	13.5	98.554	1	0	0	1	0	0	0
P63242;Q8BGY2	Eukaryotic translation initiation factor 5A-1;Eukaryotic translation initiation factor 5A-2	Eif5a;Eif5a2	Eukaryotic translation initiation factor 5A-1 OS=Mus musculus OX=10090 GN=Eif5a PE=1 SV=2;Eukaryotic translation initiation factor 5A-2 OS=Mus musculus OX=10090 GN=Eif5a2 PE=1 SV=3	2		21.088	21.2553	22.6462	22.3771	22.1637	22.2573	2	2	22.7	131.788	11	1	1	1	3	2	3
Q9CZU3	Superkiller viralicidic activity 2-like 2	Skiv2l2	Exosome RNA helicase MTR4 OS=Mus musculus OX=10090 GN=Mtrex PE=1 SV=1	4		18.3008	18.8046	18.7401	18.6256	19.1002	20.0872	4	4	5	113.659	1	0	0	0	0	0	1
P48962	ADP/ATP translocase 1	Slc25a4	ADP/ATP translocase 1 OS=Mus musculus OX=10090 GN=Slc25a4 PE=1 SV=4	3		20.1167	19.9102	20.2739	20.1268	21.0891	21.0481	10	3	31.9	122.565	7	1	1	1	2	1	1
Q60848	Lymphocyte-specific helicase	Hells	Lymphocyte-specific helicase OS=Mus musculus OX=10090 GN=Hells PE=1 SV=2	5		18.4968	18.8234	19.4125	19.2751	19.4724	19.9583	5	5	7.3	115.438	4	0	0	1	1	0	2
Q9CW03	Structural maintenance of chromosomes protein 3	Smc3	Structural maintenance of chromosomes protein 3 OS=Mus musculus OX=10090 GN=Smc3 PE=1 SV=2	3		19.3229	NaN	20.2157	19.8026	20.8881	19.9552	3	3	3.1	100.184	3	0	0	1	1	1	0
P80317	T-complex protein 1 subunit zeta	Cct6a	T-complex protein 1 subunit zeta OS=Mus musculus OX=10090 GN=Cct6a PE=1 SV=3	12		20.6141	20.7702	21.2833	20.72	21.8269	21.7682	12	12	32.4	126.983	13	0	0	2	3	4	4
P20029	78 kDa glucose-regulated protein	Hspa5	Endoplasmic reticulum chaperone BiP OS=Mus musculus OX=10090 GN=Hspa5 PE=1 SV=3	11		20.2333	20.0303	20.7926	20.3466	21.3706	21.1448	13	11	25.3	123.918	28	0	1	7	7	4	9
P49717	DNA replication licensing factor MCM4	Mcm4	DNA replication licensing factor MCM4 OS=Mus musculus OX=10090 GN=Mcm4 PE=1 SV=1	10		18.4967	19.5685	20.121	19.9763	19.8131	20.5444	10	10	14	118.52	8	0	0	3	4	0	1
Q61881	DNA replication licensing factor MCM7	Mcm7	DNA replication licensing factor MCM7 OS=Mus musculus OX=10090 GN=Mcm7 PE=1 SV=1	14		19.8709	20.1115	20.859	20.8848	21.0452	21.2332	14	14	29.5	124.005	14	0	1	1	4	3	5
O35345	Importin subunit alpha-7	Kpna6	Importin subunit alpha-7 OS=Mus musculus OX=10090 GN=Kpna6 PE=1 SV=2	3		NaN	17.7911	NaN	NaN	19.0013	NaN	3	3	9	36.7924	0	0	0	0	0	0	0
Q9ER88	28S ribosomal protein S29, mitochondrial	Dap3	28S ribosomal protein S29, mitochondrial OS=Mus musculus OX=10090 GN=Dap3 PE=1 SV=1	7		NaN	15.5476	15.6199	16.3829	16.7787	NaN	7	7	24.6	64.3291	0	0	0	0	0	0	0
Q91V92	ATP-citrate synthase	Acly	ATP-citrate synthase OS=Mus musculus OX=10090 GN=Acly PE=1 SV=1	2		18.9748	20.5807	19.8256	19.7082	21.0501	21.0324	2	2	2.7	121.172	9	0	2	1	2	2	2
P49718	DNA replication licensing factor MCM5	Mcm5	DNA replication licensing factor MCM5 OS=Mus musculus OX=10090 GN=Mcm5 PE=1 SV=2	17		23.4114	23.4918	24.4857	24.3558	24.7454	24.6935	17	17	33.7	145.184	36	1	1	8	11	6	9
Q9WUA3;P12382	ATP-dependent 6-phosphofructokinase, platelet type;ATP-dependent 6-phosphofructokinase, liver type	Pfkp;Pfkl	ATP-dependent 6-phosphofructokinase, platelet type OS=Mus musculus OX=10090 GN=Pfkp PE=1 SV=1;ATP-dependent 6-phosphofructokinase, liver type OS=Mus musculus OX=10090 GN=Pfkl PE=1 SV=4	2		17.6785	17.7894	18.3352	18.2912	18.8628	19.2309	2	2	4.6	110.188	5	0	0	1	2	0	2
Q9CXW3	Calcyclin-binding protein	Cacybp	Calcyclin-binding protein OS=Mus musculus OX=10090 GN=Cacybp PE=1 SV=1	3		NaN	19.0349	19.8501	20.3035	20.5249	20.2264	3	3	22.7	99.9398	4	0	0	0	3	1	0
P19157	Glutathione S-transferase P 1	Gstp1	Glutathione S-transferase P 1 OS=Mus musculus OX=10090 GN=Gstp1 PE=1 SV=2	6		20.9159	20.4435	21.1365	21.3351	22.5537	21.4991	6	3	41.4	127.884	18	2	1	2	4	5	4
P14733	Lamin-B1	Lmnb1	Lamin-B1 OS=Mus musculus OX=10090 GN=Lmnb1 PE=1 SV=3	4		19.349	19.2698	19.9266	20.2692	20.5687	20.7554	4	4	8.2	120.139	6	0	0	1	1	2	2
Q6A4J8	Ubiquitin carboxyl-terminal hydrolase 7	Usp7	Ubiquitin carboxyl-terminal hydrolase 7 OS=Mus musculus OX=10090 GN=Usp7 PE=1 SV=1	6		19.5504	19.3188	21.3564	20.7954	20.7261	20.8724	6	6	8.6	122.619	5	0	0	1	2	1	1
P35700	Peroxiredoxin-1	Prdx1	Peroxiredoxin-1 OS=Mus musculus OX=10090 GN=Prdx1 PE=1 SV=1	5		20.5108	21.3027	21.3571	21.3871	22.2947	22.251	5	5	24.1	129.103	7	1	1	1	2	1	1
P56546	C-terminal-binding protein 2	Ctbp2	C-terminal-binding protein 2 OS=Mus musculus OX=10090 GN=Ctbp2 PE=1 SV=2	5		19.6848	19.5591	20.8519	20.3612	20.8976	21.0818	5	5	14.8	122.436	5	0	0	1	1	1	2
P07901	Heat shock protein HSP 90-alpha	Hsp90aa1	Heat shock protein HSP 90-alpha OS=Mus musculus OX=10090 GN=Hsp90aa1 PE=1 SV=4	26		22.4654	23.2832	22.9622	22.9844	24.2029	24.3152	26	16	39.4	140.213	75	5	10	14	13	14	19
P25206	DNA replication licensing factor MCM3	Mcm3	DNA replication licensing factor MCM3 OS=Mus musculus OX=10090 GN=Mcm3 PE=1 SV=2	10		19.3737	19.8669	20.571	20.1833	20.9723	21.0585	10	10	16	122.026	8	0	0	1	1	2	4
P18760	Cofilin-1	Cfl1	Cofilin-1 OS=Mus musculus OX=10090 GN=Cfl1 PE=1 SV=3	4		20.1887	20.0128	20.712	20.386	21.6047	21.4701	4	4	32.5	124.374	5	0	1	1	1	0	2
Q8BK67	Protein RCC2	Rcc2	Protein RCC2 OS=Mus musculus OX=10090 GN=Rcc2 PE=1 SV=1	6		19.2246	20.4048	21.2649	21.3308	21.3692	21.1749	6	6	18.5	124.769	13	0	1	4	5	1	2
P10711	Transcription elongation factor A protein 1	Tcea1	Transcription elongation factor A protein 1 OS=Mus musculus OX=10090 GN=Tcea1 PE=1 SV=2	2		18.8193	NaN	20.6634	20.0636	20.6621	19.9271	2	2	9	100.136	5	0	0	2	1	1	1
Q6PDQ2	Chromodomain-helicase-DNA-binding protein 4	Chd4	Chromodomain-helicase-DNA-binding protein 4 OS=Mus musculus OX=10090 GN=Chd4 PE=1 SV=1	7		18.2382	17.7498	20.0438	20.8045	19.2608	19.7103	7	7	6.8	115.807	12	0	0	2	7	0	3
Q80U70	Polycomb protein Suz12	Suz12	Polycomb protein Suz12 OS=Mus musculus OX=10090 GN=Suz12 PE=1 SV=2	2		17.6666	17.7713	19.2746	19.5166	18.9067	19.5201	2	2	2.7	112.656	3	0	0	1	2	0	0
P11103	Poly [ADP-ribose] polymerase 1	Parp1	Poly [ADP-ribose] polymerase 1 OS=Mus musculus OX=10090 GN=Parp1 PE=1 SV=3	15		19.0556	20.186	21.7376	21.5936	21.2316	21.0508	15	15	21.4	124.855	21	0	1	5	10	3	2
P97822	Acidic leucine-rich nuclear phosphoprotein 32 family member E	Anp32e	Acidic leucine-rich nuclear phosphoprotein 32 family member E OS=Mus musculus OX=10090 GN=Anp32e PE=1 SV=2	4		18.2056	17.8876	22.5993	22.4702	19.5104	19.6967	4	4	19.2	120.37	7	0	0	3	4	0	0
P84244;P84228;P68433;P02301	Histone H3.3;Histone H3.2;Histone H3.1;Histone H3.3C	H3f3a;Hist1h3b;Hist1h3a;H3f3c	Histone H3.3 OS=Mus musculus OX=10090 GN=H3-3a PE=1 SV=2;Histone H3.2 OS=Mus musculus OX=10090 GN=H3c2 PE=1 SV=2;Histone H3.1 OS=Mus musculus OX=10090 GN=H3c1 PE=1 SV=2;Histone H3.3C OS=Mus musculus OX=10090 GN=H3-5 PE=3 SV=3	2		24.1506	20.9492	24.8515	26.6444	23.9569	24.383	2	2	10.3	144.936	1	0	0	0	1	0	0
P70168	Importin subunit beta-1	Kpnb1	Importin subunit beta-1 OS=Mus musculus OX=10090 GN=Kpnb1 PE=1 SV=2	3		NaN	18.8188	20.1356	18.5491	20.5888	20.3405	3	3	5.5	98.4328	4	0	0	1	0	1	2
Q8CAQ8	MICOS complex subunit Mic60	Immt	MICOS complex subunit Mic60 OS=Mus musculus OX=10090 GN=Immt PE=1 SV=1	2		18.2767	18.0339	19.8514	18.3881	19.8714	19.7541	2	2	3.7	114.176	4	0	0	2	0	1	1
Q9ERG0	LIM domain and actin-binding protein 1	Lima1	LIM domain and actin-binding protein 1 OS=Mus musculus OX=10090 GN=Lima1 PE=1 SV=3	2		18.224	17.7652	17.6817	17.9883	19.8602	19.6533	2	2	3.3	111.173	2	0	0	0	0	1	1
P54071	Isocitrate dehydrogenase [NADP], mitochondrial	Idh2	Isocitrate dehydrogenase [NADP], mitochondrial OS=Mus musculus OX=10090 GN=Idh2 PE=1 SV=3	2		19.026	19.1353	20.5413	20.7241	21.0335	20.8392	2	2	6	121.299	5	0	0	1	2	1	1
Q9CPP0	Nucleoplasmin-3	Npm3	Nucleoplasmin-3 OS=Mus musculus OX=10090 GN=Npm3 PE=1 SV=3	2		NaN	17.7671	19.2867	19.2027	20.1995	19.1144	2	2	17.7	95.5705	4	0	0	1	1	1	1
Q80VD1	Protein FAM98B	Fam98b	Protein FAM98B OS=Mus musculus OX=10090 GN=Fam98b PE=1 SV=1	5		23.0307	19.7602	19.8233	19.6897	22.877	23.7527	5	5	14.7	128.934	8	0	0	0	0	3	5
Q62318	Transcription intermediary factor 1-beta	Trim28	Transcription intermediary factor 1-beta OS=Mus musculus OX=10090 GN=Trim28 PE=1 SV=3	23		22.3753	22.2582	24.0639	24.033	24.1824	24.3336	23	23	43.5	141.246	83	4	6	17	25	16	15
Q8BGQ7	Alanine--tRNA ligase, cytoplasmic	Aars	Alanine--tRNA ligase, cytoplasmic OS=Mus musculus OX=10090 GN=Aars1 PE=1 SV=1	7		18.0515	18.6551	18.4695	18.1847	20.1121	20.5775	7	7	10	114.05	5	0	0	0	0	1	4
P54276	DNA mismatch repair protein Msh6	Msh6	DNA mismatch repair protein Msh6 OS=Mus musculus OX=10090 GN=Msh6 PE=1 SV=3	17		18.9022	19.3069	21.1823	21.2395	21.1625	21.1748	17	17	16.7	122.968	27	0	0	6	8	6	7
Q60953	Protein PML	Pml	Protein PML OS=Mus musculus OX=10090 GN=Pml PE=1 SV=3	4		17.9203	NaN	18.5486	18.8964	19.6388	20.3955	4	4	6	95.3996	6	0	0	0	1	1	4
P05064	Fructose-bisphosphate aldolase A	Aldoa	Fructose-bisphosphate aldolase A OS=Mus musculus OX=10090 GN=Aldoa PE=1 SV=2	3		NaN	18.4876	19.0694	19.3442	20.6528	20.7099	3	3	13.2	98.2639	6	0	0	0	2	2	2
P43247	DNA mismatch repair protein Msh2	Msh2	DNA mismatch repair protein Msh2 OS=Mus musculus OX=10090 GN=Msh2 PE=1 SV=1	12		18.0268	18.9636	20.9152	21.3069	21.0485	20.4025	12	12	18.8	120.663	17	0	1	6	6	3	1
P62259	14-3-3 protein epsilon	Ywhae	14-3-3 protein epsilon OS=Mus musculus OX=10090 GN=Ywhae PE=1 SV=1	5		18.6023	19.5104	21.5131	21.2431	21.3053	21.367	5	4	22	123.541	13	0	0	4	4	2	3
Q6PR54	Telomere-associated protein RIF1	Rif1	Telomere-associated protein RIF1 OS=Mus musculus OX=10090 GN=Rif1 PE=1 SV=2	6		17.3027	18.2898	20.6682	20.465	19.516	20.7899	6	6	3.6	117.032	8	0	0	2	4	0	2
Q91VR5	ATP-dependent RNA helicase DDX1	Ddx1	ATP-dependent RNA helicase DDX1 OS=Mus musculus OX=10090 GN=Ddx1 PE=1 SV=1	8		20.2417	19.9721	20.4903	20.2964	23.1093	22.6035	8	8	17.6	126.713	16	1	1	2	2	4	6
P52293	Importin subunit alpha-1	Kpna2	Importin subunit alpha-1 OS=Mus musculus OX=10090 GN=Kpna2 PE=1 SV=2	7		19.3732	19.461	20.1658	20.6032	22.8274	22.7031	7	7	19.8	125.134	12	0	0	1	3	4	4
Q99LF4	tRNA-splicing ligase RtcB homolog	Rtcb	RNA-splicing ligase RtcB homolog OS=Mus musculus OX=10090 GN=Rtcb PE=1 SV=1	8		19.5222	19.6825	19.8336	19.9285	23.226	24.1658	8	8	19.2	126.358	10	0	0	0	1	3	6
P15105	Glutamine synthetase	Glul	Glutamine synthetase OS=Mus musculus OX=10090 GN=Glul PE=1 SV=6	2		15.3057	15.6943	15.8867	15.3909	21.0808	21.3026	2	2	8	104.661	3	0	0	0	0	2	1
Q9CQE8	UPF0568 protein C14orf166 homolog		RNA transcription, translation and transport factor protein OS=Mus musculus OX=10090 GN=RTRAF PE=1 SV=1	6		15.9434	14.7116	14.7354	15.6501	23.0715	23.1125	6	6	31.1	107.224	7	0	0	0	0	3	4
CON__Q9U6Y5		GFP		8	+	15.0923	15.0975	14.9148	16.3549	26.2393	26.463	8	8	51.8	114.162	23	0	0	0	0	10	13

## Sheet: 2_safb_post_impute
Majority protein IDs	Protein names	Gene names	Fasta headers	Razor + unique peptides	Potential contaminant	Student's T-test Difference FL SAFB_eGFP	Student's T-test Difference safb∆dd2_Egfp	Student's T-test p-value FL SAFB_eGFP	Student's T-test p-value safb∆dd2_eGFP	Student's T-test p-value FL SAFB_safb∆dd2	Log2 LFQ intensity 1 FL SAFB R1	Log2 LFQ intensity 2 FL SAFB R2	Log2 LFQ intensity 3 safb∆dd2 R1	Log2 LFQ intensity 4 safb∆dd2 R2	Log2 LFQ intensity 5 eGFP R1	Log2 LFQ intensity 6 eGFP R2	Peptides	Unique peptides	Sequence coverage [%]	Summed Log2 LFQ intensity	MS/MS count	MS/MS count 1	MS/MS count 2	MS/MS count 3	MS/MS count 4	MS/MS count 5	MS/MS count 6
D3YXK2	Scaffold attachment factor B1	Safb	Scaffold attachment factor B1 OS=Mus musculus OX=10090 GN=Safb PE=1 SV=2	23		7.30195	13.3201	0.031218	0.0188933	0.0020134	23.4737	23.1114	29.4492	29.1722	15.4378	16.5434	23	23	21.9	137.188	126	7	7	54	58	0	0
Q91VJ4	Serine/threonine-protein kinase 38	Stk38	Serine/threonine-protein kinase 38 OS=Mus musculus OX=10090 GN=Stk38 PE=1 SV=1	4		5.63529	4.72132	0.0155678	0.0268398	0.0288313	21.6208	21.3937	20.6744	20.5122	15.5854	16.1585	4	4	12.3	115.945	7	1	2	2	2	0	0
P11404	Fatty acid-binding protein, heart	Fabp3	Fatty acid-binding protein, heart OS=Mus musculus OX=10090 GN=Fabp3 PE=1 SV=5	2		5.59783	-0.294609	0.00285588	0.111557	0.000787871	22.5816	22.3689	16.6634	16.5022	16.9284	16.8264	2	2	18	111.871	0	0	0	0	0	0	0
Q91VM5;Q9WV02	RNA binding motif protein, X-linked-like-1;RNA-binding motif protein, X chromosome;RNA-binding motif protein, X chromosome, N-terminally processed	Rbmxl1;Rbmx	RNA binding motif protein, X-linked-like-1 OS=Mus musculus OX=10090 GN=Rbmxl1 PE=2 SV=1;RNA-binding motif protein, X chromosome OS=Mus musculus OX=10090 GN=Rbmx PE=1 SV=1	14		4.83592	0.719065	0.0702444	0.445065	0.0406679	24.654	24.9154	20.2757	21.0599	19.3308	20.5667	14	14	36.6	130.803	16	5	4	2	3	0	2
P84104	Serine/arginine-rich splicing factor 3	Srsf3	Serine/arginine-rich splicing factor 3 OS=Mus musculus OX=10090 GN=Srsf3 PE=1 SV=1	5		4.77648	1.32236	0.128646	0.397495	0.0409971	23.5921	23.5382	19.875	20.3471	19.769	17.8083	5	4	31.7	124.93	6	2	3	0	1	0	0
Q9R0U0	Serine/arginine-rich splicing factor 10	Srsf10	Serine/arginine-rich splicing factor 10 OS=Mus musculus OX=10090 GN=Srsf10 PE=1 SV=2	6		4.31318	0.717649	0.0569901	0.328842	0.00757933	22.2241	22.1295	18.5866	18.5759	17.456	18.2713	6	6	23.7	117.243	6	3	3	0	0	0	0
Q8CIG8	Protein arginine N-methyltransferase 5	Prmt5	Protein arginine N-methyltransferase 5 OS=Mus musculus OX=10090 GN=Prmt5 PE=1 SV=3	15		3.68038	2.62812	0.130915	0.164373	0.0995024	24.2252	24.0584	23.3112	22.8679	19.6735	21.2493	15	15	28.7	135.386	33	7	9	6	9	0	2
Q9D0B0	Serine/arginine-rich splicing factor 9	Srsf9	Serine/arginine-rich splicing factor 9 OS=Mus musculus OX=10090 GN=Srsf9 PE=1 SV=1	2		3.58071	-1.00062	0.0835303	0.389809	0.0895415	20.6973	20.9613	15.5333	16.9626	16.6945	17.8026	2	2	9	108.652	1	1	0	0	0	0	0
P62996	Transformer-2 protein homolog beta	Tra2b	Transformer-2 protein homolog beta OS=Mus musculus OX=10090 GN=Tra2b PE=1 SV=1	4		3.41832	0.219093	0.0362216	0.583119	0.0181272	23.4978	23.654	20.187	20.5663	20.429	19.8862	4	4	17.4	128.22	13	3	5	1	2	1	1
Q6PDM2	Serine/arginine-rich splicing factor 1	Srsf1	Serine/arginine-rich splicing factor 1 OS=Mus musculus OX=10090 GN=Srsf1 PE=1 SV=3	5		3.40425	0.745491	0.191965	0.630584	0.0198108	20.6738	21.1783	18.4305	18.1041	16.3826	18.661	5	5	24.2	113.43	3	1	2	0	0	0	0
O35326	Serine/arginine-rich splicing factor 5	Srsf5	Serine/arginine-rich splicing factor 5 OS=Mus musculus OX=10090 GN=Srsf5 PE=1 SV=2	4		3.39412	0.875553	0.184353	0.544775	0.0294398	21.2248	21.2144	18.5833	18.8188	16.8141	18.8368	4	4	19.3	115.492	5	2	3	0	0	0	0
Q64012	RNA-binding protein Raly	Raly	RNA-binding protein Raly OS=Mus musculus OX=10090 GN=Raly PE=1 SV=3	13		3.32822	1.2232	0.107898	0.288402	0.256325	18.4562	20.2527	17.2138	17.285	15.4286	16.6239	13	13	40.1	105.26	2	0	2	0	0	0	0
Q8CFE4	SCY1-like protein 2	Scyl2	SCY1-like protein 2 OS=Mus musculus OX=10090 GN=Scyl2 PE=1 SV=1	3		3.31238	2.80758	0.0453438	0.0351135	0.0914374	20.2717	20.2326	19.663	19.8317	16.6967	17.1829	3	3	4.4	113.879	5	1	1	1	2	0	0
P62717	60S ribosomal protein L18a	Rpl18a	60S ribosomal protein L18a OS=Mus musculus OX=10090 GN=Rpl18a PE=1 SV=1	2		3.15091	2.04367	0.334393	0.483713	0.32232	20.5303	21.7808	20.1407	19.9559	19.9479	16.0613	2	2	10.2	118.417	2	0	1	0	0	1	0
Q99J09	Methylosome protein 50	Wdr77	Methylosome protein 50 OS=Mus musculus OX=10090 GN=Wdr77 PE=1 SV=1	5		2.99612	1.87248	0.00666722	0.0331728	0.0928486	24.5422	24.316	23.5496	23.0613	21.5943	21.2717	5	5	24.3	138.335	15	4	3	4	4	0	0
P36993	Protein phosphatase 1B	Ppm1b	Protein phosphatase 1B OS=Mus musculus OX=10090 GN=Ppm1b PE=1 SV=1	7		2.80428	2.20491	0.0993278	0.105196	0.156079	21.8907	22.1101	21.6027	21.1994	18.6969	19.6954	7	7	27.9	125.195	9	1	2	2	3	0	1
Q8BGD9	Eukaryotic translation initiation factor 4B	Eif4b	Eukaryotic translation initiation factor 4B OS=Mus musculus OX=10090 GN=Eif4b PE=1 SV=1	2		2.73274	1.04255	0.207596	0.514068	0.32322	21.0907	20.9631	18.3926	20.2808	17.3632	19.2251	2	2	4.9	117.316	3	1	1	0	1	0	0
Q3TWW8	Serine/arginine-rich splicing factor 6	Srsf6	Serine/arginine-rich splicing factor 6 OS=Mus musculus OX=10090 GN=Srsf6 PE=1 SV=1	4		2.6251	0.279891	0.0775455	0.625456	0.0064047	22.8115	22.5412	20.441	20.2213	20.4724	19.6301	4	3	13.6	126.118	5	2	2	1	0	0	0
Q9EP97	Sentrin-specific protease 3	Senp3	Sentrin-specific protease 3 OS=Mus musculus OX=10090 GN=Senp3 PE=1 SV=1	2		2.56601	-2.35684	0.451105	0.651242	0.412069	26.4022	26.1921	25.0972	17.6514	21.5296	25.9326	2	2	4.6	142.805	1	0	0	1	0	0	0
Q8BL97	Serine/arginine-rich splicing factor 7	Srsf7	Serine/arginine-rich splicing factor 7 OS=Mus musculus OX=10090 GN=Srsf7 PE=1 SV=1	4		2.49903	0.312382	0.0550678	0.215727	0.0328166	22.488	22.9706	20.4184	20.6669	20.1895	20.271	5	4	17.2	127.005	4	0	2	1	1	0	0
P62751	60S ribosomal protein L23a	Rpl23a	60S ribosomal protein L23a OS=Mus musculus OX=10090 GN=Rpl23a PE=1 SV=1	3		2.39334	2.38476	0.0761965	0.0402691	0.985026	21.6013	21.7293	21.2935	22.0199	19.5965	18.9474	3	3	25	125.188	8	1	2	2	3	0	0
Q8BP67	60S ribosomal protein L24	Rpl24	60S ribosomal protein L24 OS=Mus musculus OX=10090 GN=Rpl24 PE=1 SV=2	3		2.35148	2.64468	0.438813	0.404622	0.432698	21.5549	22.0298	22.0704	22.1006	17.4898	21.3919	3	3	19.1	126.637	4	0	1	1	2	0	0
Q62093	Serine/arginine-rich splicing factor 2	Srsf2	Serine/arginine-rich splicing factor 2 OS=Mus musculus OX=10090 GN=Srsf2 PE=1 SV=4	3		2.02503	0.834769	0.0747849	0.226655	0.141459	21.8562	21.1536	20.6739	19.9553	19.6227	19.337	3	3	18.6	122.599	4	1	1	1	1	0	0
P47911	60S ribosomal protein L6	Rpl6	60S ribosomal protein L6 OS=Mus musculus OX=10090 GN=Rpl6 PE=1 SV=3	8		1.95783	1.67396	0.100998	0.139259	0.352471	22.2017	21.8279	21.5984	21.8634	19.6185	20.4954	8	8	26.7	127.605	16	2	4	3	6	0	1
A2AKX3	Probable helicase senataxin	Setx	Probable helicase senataxin OS=Mus musculus OX=10090 GN=Setx PE=1 SV=1	4		1.931	0.951429	0.146103	0.206182	0.356332	19.0971	20.3352	18.6692	18.8039	17.4472	18.1231	4	4	1.9	112.476	6	0	4	0	2	0	0
Q60749	KH domain-containing, RNA-binding, signal transduction-associated protein 1	Khdrbs1	KH domain-containing, RNA-binding, signal transduction-associated protein 1 OS=Mus musculus OX=10090 GN=Khdrbs1 PE=1 SV=2	4		1.91786	0.429633	0.00306423	0.165254	0.0368503	20.783	20.7184	19.1453	19.3797	18.8468	18.8189	4	4	19	117.692	3	1	1	0	1	0	0
Q9Z204	Heterogeneous nuclear ribonucleoproteins C1/C2	Hnrnpc	Heterogeneous nuclear ribonucleoproteins C1/C2 OS=Mus musculus OX=10090 GN=Hnrnpc PE=1 SV=1	18		1.85141	0.216512	0.0216647	0.00596632	0.0235995	23.2845	23.4117	21.7191	21.7073	21.4992	21.4941	18	18	50.8	133.116	19	3	6	5	3	1	1
O88569	Heterogeneous nuclear ribonucleoproteins A2/B1	Hnrnpa2b1	Heterogeneous nuclear ribonucleoproteins A2/B1 OS=Mus musculus OX=10090 GN=Hnrnpa2b1 PE=1 SV=2	20		1.84887	0.0703096	0.00292748	0.884699	0.133305	22.3596	22.3001	20.168	20.9346	20.4307	20.5313	20	19	61.5	126.724	13	3	2	0	4	2	2
Q9D883	Splicing factor U2AF 35 kDa subunit	U2af1	Splicing factor U2AF 35 kDa subunit OS=Mus musculus OX=10090 GN=U2af1 PE=1 SV=4	3		1.8151	0.549405	0.198539	0.16475	0.260796	22.6848	21.5138	20.6866	20.9806	20.2733	20.2951	3	3	18	126.434	8	2	1	1	2	1	1
Q8VIG1	RE1-silencing transcription factor	Rest	RE1-silencing transcription factor OS=Mus musculus OX=10090 GN=Rest PE=1 SV=2	5		1.78215	1.59155	0.208598	0.243041	0.538858	20.0482	20.4576	20.2153	19.9094	17.7936	19.1479	5	5	6.4	117.572	5	0	2	2	1	0	0
P49312	Heterogeneous nuclear ribonucleoprotein A1;Heterogeneous nuclear ribonucleoprotein A1, N-terminally processed	Hnrnpa1	Heterogeneous nuclear ribonucleoprotein A1 OS=Mus musculus OX=10090 GN=Hnrnpa1 PE=1 SV=2	15		1.70992	0.083209	0.0434715	0.798111	0.0466919	23.7909	24.104	22.0677	22.5738	22.1939	22.2812	16	14	58.1	137.011	26	4	4	4	7	2	5
CON__P04264				27	+	1.69327	1.38664	0.225313	0.515445	0.872908	25.1133	23.8885	22.7178	25.6707	22.0644	23.5507	27	18	41.1	143.005	67	12	6	5	32	3	9
Q501J6	Probable ATP-dependent RNA helicase DDX17	Ddx17	Probable ATP-dependent RNA helicase DDX17 OS=Mus musculus OX=10090 GN=Ddx17 PE=1 SV=1	13		1.67172	0.184898	0.0637005	0.629331	0.111991	20.7228	20.6866	18.9504	19.4854	19.2076	18.8584	17	13	31.4	117.911	7	2	2	0	3	0	0
Q8BG81	Polymerase delta-interacting protein 3	Poldip3	Polymerase delta-interacting protein 3 OS=Mus musculus OX=10090 GN=Poldip3 PE=1 SV=1	2		1.6655	1.17297	0.0104783	0.0305446	0.0917494	18.4935	18.7235	18.0504	18.1816	17.068	16.818	2	2	7.9	107.335	0	0	0	0	0	0	0
CON__P13645				22	+	1.66088	1.15621	0.318369	0.627928	0.816745	28.0802	27.2266	25.4543	28.8431	24.9955	26.9895	22	19	41	161.589	71	12	10	4	34	2	9
Q8BG05	Heterogeneous nuclear ribonucleoprotein A3	Hnrnpa3	Heterogeneous nuclear ribonucleoprotein A3 OS=Mus musculus OX=10090 GN=Hnrnpa3 PE=1 SV=1	14		1.65441	0.125045	0.0170694	0.601644	0.0129016	22.9996	23.2425	21.4656	21.7177	21.3088	21.6244	15	14	34.3	132.359	27	4	5	5	5	3	5
Q7TMK9	Heterogeneous nuclear ribonucleoprotein Q	Syncrip	Heterogeneous nuclear ribonucleoprotein Q OS=Mus musculus OX=10090 GN=Syncrip PE=1 SV=2	21		1.6389	1.05282	0.0278807	0.102956	0.172314	20.8171	21.1194	20.165	20.5994	19.401	19.2578	21	21	40.4	121.36	8	1	3	1	3	0	0
Q61656	Probable ATP-dependent RNA helicase DDX5	Ddx5	Probable ATP-dependent RNA helicase DDX5 OS=Mus musculus OX=10090 GN=Ddx5 PE=1 SV=2	27		1.62843	-0.0990505	0.0160346	0.356979	0.0344873	23.4593	23.6992	21.8231	21.8804	21.8838	22.0178	27	23	46.1	134.764	39	8	8	4	10	3	6
CON__P13647;CON__P48668;CON__P04259;CON__P02538			;;;	4	+	1.62436	1.11891	0.0657093	0.438732	0.690039	19.3957	19.8387	18.157	20.0664	18.316	17.6697	8	3	12.5	113.444	4	0	1	0	3	0	0
Q91WJ8	Far upstream element-binding protein 1	Fubp1	Far upstream element-binding protein 1 OS=Mus musculus OX=10090 GN=Fubp1 PE=1 SV=1	12		1.61698	-1.20201	0.096381	0.240181	0.123448	20.105	20.1639	17.8729	16.758	18.7736	18.2612	13	12	29.3	111.935	1	0	1	0	0	0	0
Q8R081	Heterogeneous nuclear ribonucleoprotein L	Hnrnpl	Heterogeneous nuclear ribonucleoprotein L OS=Mus musculus OX=10090 GN=Hnrnpl PE=1 SV=2	18		1.5867	0.00671005	0.102998	0.983318	0.141545	21.8693	22.6851	20.8061	20.5884	20.4429	20.9381	18	18	38.1	127.33	9	1	3	2	1	0	2
P61358	60S ribosomal protein L27	Rpl27	60S ribosomal protein L27 OS=Mus musculus OX=10090 GN=Rpl27 PE=1 SV=2	2		1.56836	3.16263	0.624807	0.0804802	0.620737	16.3084	21.0119	20.249	20.2598	17.494	16.6896	2	2	15.4	112.013	4	0	1	1	1	1	0
P61979	Heterogeneous nuclear ribonucleoprotein K	Hnrnpk	Heterogeneous nuclear ribonucleoprotein K OS=Mus musculus OX=10090 GN=Hnrnpk PE=1 SV=1	25		1.53974	0.308901	0.00268349	0.0453032	0.00551143	23.3403	23.4558	22.2063	22.128	21.8077	21.9088	25	25	52.5	134.847	22	4	7	3	3	3	2
CON__P35908v2;CON__P35908			;	22	+	1.52538	1.20258	0.391168	0.62245	0.891958	23.9798	21.8725	20.8478	24.3589	20.4804	22.3212	25	18	59.8	133.861	40	9	4	3	20	1	3
O89086	RNA-binding protein 3	Rbm3	RNA-binding protein 3 OS=Mus musculus OX=10090 GN=Rbm3 PE=1 SV=1	5		1.52044	-0.743507	0.0456107	0.0684722	0.0360194	18.6381	18.5782	16.4964	16.1919	17.2207	16.9547	5	5	34.6	104.08	0	0	0	0	0	0	0
Q8BTI8	Serine/arginine repetitive matrix protein 2	Srrm2	Serine/arginine repetitive matrix protein 2 OS=Mus musculus OX=10090 GN=Srrm2 PE=1 SV=3	5		1.48734	1.23681	0.526489	0.583948	0.399187	19.6602	19.8859	19.3311	19.714	16.667	19.9044	5	5	3	115.163	1	0	1	0	0	0	0
P14148	60S ribosomal protein L7	Rpl7	60S ribosomal protein L7 OS=Mus musculus OX=10090 GN=Rpl7 PE=1 SV=2	7		1.47764	1.73444	0.0614874	0.0249731	0.419276	22.4662	22.3595	22.4652	22.8741	20.7497	21.1207	7	7	21.9	132.035	7	1	1	1	2	1	1
P26443	Glutamate dehydrogenase 1, mitochondrial	Glud1	Glutamate dehydrogenase 1, mitochondrial OS=Mus musculus OX=10090 GN=Glud1 PE=1 SV=1	4		1.38646	-0.0166197	0.206469	0.947731	0.183228	20.0257	21.0184	19.3093	18.9286	19.0304	19.2408	4	4	10	117.553	5	0	3	1	1	0	0
P84089	Enhancer of rudimentary homolog	Erh	Enhancer of rudimentary homolog OS=Mus musculus OX=10090 GN=Erh PE=1 SV=1	2		1.38628	2.70839	0.224905	0.108209	0.0245178	23.1152	23.0142	24.4959	24.2777	22.1965	21.1604	2	2	21.2	138.26	7	1	1	2	2	1	0
Q8VC57	BTB/POZ domain-containing protein KCTD5	Kctd5	BTB/POZ domain-containing protein KCTD5 OS=Mus musculus OX=10090 GN=Kctd5 PE=1 SV=1	3		1.37025	0.699464	0.348044	0.475104	0.612178	22.1522	23.9359	21.7078	23.0387	21.3486	21.999	3	3	20.9	134.182	10	1	5	0	3	0	1
Q8CH25	SAFB-like transcription modulator	Sltm	SAFB-like transcription modulator OS=Mus musculus OX=10090 GN=Sltm PE=1 SV=1	4		1.35063	-1.20648	0.0619931	0.43819	0.237655	21.3308	21.4314	19.8289	17.819	20.2024	19.8585	4	4	4.1	120.471	3	1	2	0	0	0	0
O88291	DBIRD complex subunit ZNF326	Znf326	DBIRD complex subunit ZNF326 OS=Mus musculus OX=10090 GN=Znf326 PE=1 SV=1	7		1.3346	-0.334937	0.0245594	0.548877	0.115791	17.7907	18.0834	16.6634	15.8717	16.4485	16.7564	7	7	16.9	101.614	0	0	0	0	0	0	0
O35737	Heterogeneous nuclear ribonucleoprotein H;Heterogeneous nuclear ribonucleoprotein H, N-terminally processed	Hnrnph1	Heterogeneous nuclear ribonucleoprotein H OS=Mus musculus OX=10090 GN=Hnrnph1 PE=1 SV=3	15		1.32274	0.168897	0.131365	0.68658	0.0102816	22.2802	22.4397	21.2625	21.1497	21.3523	20.7222	15	9	46.1	129.207	27	5	9	5	4	2	2
CON__P35527				21	+	1.31268	1.46635	0.302489	0.474215	0.933388	23.6902	22.2583	21.7341	24.5218	21.041	22.2822	22	21	51.7	135.527	63	13	5	6	28	3	8
Q9CXY6	Interleukin enhancer-binding factor 2	Ilf2	Interleukin enhancer-binding factor 2 OS=Mus musculus OX=10090 GN=Ilf2 PE=1 SV=1	15		1.30913	0.840089	0.349615	0.477267	0.310939	19.1681	19.1413	18.9355	18.4357	17.0442	18.6468	15	15	51.5	111.372	0	0	0	0	0	0	0
Q9CR57	60S ribosomal protein L14	Rpl14	60S ribosomal protein L14 OS=Mus musculus OX=10090 GN=Rpl14 PE=1 SV=3	3		1.24888	0.811039	0.176411	0.235563	0.514004	21.0861	22.0181	20.9654	21.263	19.9399	20.6665	3	3	17.1	125.939	10	2	1	2	4	0	1
Q8JZQ9	Eukaryotic translation initiation factor 3 subunit B	Eif3b	Eukaryotic translation initiation factor 3 subunit B OS=Mus musculus OX=10090 GN=Eif3b PE=1 SV=1	5		1.23353	0.0201588	0.0491201	0.951038	0.128364	20.6436	20.5977	19.6602	19.1543	19.275	19.4992	5	5	10.2	118.83	2	1	1	0	0	0	0
Q9D8E6	60S ribosomal protein L4	Rpl4	60S ribosomal protein L4 OS=Mus musculus OX=10090 GN=Rpl4 PE=1 SV=3	9		1.21815	1.02337	0.0199764	0.0378154	0.106779	22.9994	23.1045	22.8202	22.8941	21.9326	21.7349	9	9	23.9	135.486	16	2	3	2	6	1	2
Q99020	Heterogeneous nuclear ribonucleoprotein A/B	Hnrnpab	Heterogeneous nuclear ribonucleoprotein A/B OS=Mus musculus OX=10090 GN=Hnrnpab PE=1 SV=1	9		1.21039	0.120482	0.0122108	0.419432	0.0116959	22.5678	22.7254	21.5031	21.6102	21.534	21.3384	9	9	27	131.279	18	2	4	3	5	2	2
O08583	THO complex subunit 4	Alyref	THO complex subunit 4 OS=Mus musculus OX=10090 GN=Alyref PE=1 SV=3	5		1.19797	1.06964	0.0164365	0.138329	0.694055	21.6493	21.5039	21.2027	21.6939	20.4116	20.3457	5	5	27.5	126.807	12	1	3	2	5	0	1
P01631	Ig kappa chain V-II region 26-10		Ig kappa chain V-II region 26-10 OS=Mus musculus OX=10090 PE=1 SV=1	3		1.19121	0.845014	0.00935006	0.33114	0.610658	27.146	27.2764	27.3597	26.3703	25.9371	26.1028	3	3	17.7	160.192	13	3	2	2	4	1	1
Q923E4	NAD-dependent protein deacetylase sirtuin-1;SirtT1 75 kDa fragment	Sirt1	NAD-dependent protein deacetylase sirtuin-1 OS=Mus musculus OX=10090 GN=Sirt1 PE=1 SV=2	2		1.16861	3.56318	0.275095	0.0928453	0.00494179	17.3305	17.283	19.6455	19.7571	15.598	16.6783	2	2	4.7	106.292	2	0	0	1	1	0	0
Q9Z130	Heterogeneous nuclear ribonucleoprotein D-like	Hnrnpdl	Heterogeneous nuclear ribonucleoprotein D-like OS=Mus musculus OX=10090 GN=Hnrnpdl PE=1 SV=1	10		1.16724	-0.47897	0.325469	0.536177	0.251334	18.733	20.1366	17.6916	17.8855	18.8081	17.727	10	9	27.6	110.982	1	0	1	0	0	0	0
P53026	60S ribosomal protein L10a	Rpl10a	60S ribosomal protein L10a OS=Mus musculus OX=10090 GN=Rpl10a PE=1 SV=3	5		1.15082	1.07002	0.267551	0.302034	0.835961	22.2116	21.6488	22.0354	21.6634	20.1888	21.3699	5	5	22.6	129.118	5	0	0	2	1	0	2
P35980	60S ribosomal protein L18	Rpl18	60S ribosomal protein L18 OS=Mus musculus OX=10090 GN=Rpl18 PE=1 SV=3	5		1.14621	0.86338	0.0341396	0.0179121	0.262201	22.4195	22.7072	22.2048	22.3563	21.5031	21.3312	5	5	29.8	132.522	15	2	3	2	3	2	3
P12970	60S ribosomal protein L7a	Rpl7a	60S ribosomal protein L7a OS=Mus musculus OX=10090 GN=Rpl7a PE=1 SV=2	8		1.10677	1.07545	0.0123311	0.0185572	0.780002	22.1445	22.3052	22.1404	22.2467	21.0274	21.2088	8	8	26.3	131.073	10	0	1	2	5	1	1
P83882	60S ribosomal protein L36a	Rpl36a	60S ribosomal protein L36a OS=Mus musculus OX=10090 GN=Rpl36a PE=3 SV=2	2		1.09678	1.12199	0.218388	0.22011	0.765221	20.5195	20.3903	20.5014	20.4588	19.7639	18.9523	2	2	15.1	120.586	0	0	0	0	0	0	0
P62918	60S ribosomal protein L8	Rpl8	60S ribosomal protein L8 OS=Mus musculus OX=10090 GN=Rpl8 PE=1 SV=2	2		1.09568	1.00403	0.0263732	0.0666981	0.541745	22.1297	22.037	21.8859	22.0976	20.9905	20.9849	2	2	10.5	130.126	10	1	1	2	3	2	1
P62320	Small nuclear ribonucleoprotein Sm D3	Snrpd3	Small nuclear ribonucleoprotein Sm D3 OS=Mus musculus OX=10090 GN=Snrpd3 PE=1 SV=1	2		1.0935	0.140999	0.0317824	0.607457	0.0772822	21.2464	21.4805	20.611	20.211	20.2104	20.3296	2	2	13.5	124.089	5	1	1	1	1	0	1
P70372	ELAV-like protein 1	Elavl1	ELAV-like protein 1 OS=Mus musculus OX=10090 GN=Elavl1 PE=1 SV=2	10		1.08912	-0.349425	0.24071	0.627712	0.102702	20.0307	20.7889	18.6766	19.2659	18.8072	19.8341	10	10	41.1	117.403	5	1	2	0	1	0	1
P62754	40S ribosomal protein S6	Rps6	40S ribosomal protein S6 OS=Mus musculus OX=10090 GN=Rps6 PE=1 SV=1	3		1.0666	1.70424	0.0777905	0.021156	0.0595717	22.1485	22.2346	22.9265	22.7319	21.2854	20.9645	3	3	14.1	132.291	10	1	2	3	3	1	0
Q9Z1X4	Interleukin enhancer-binding factor 3	Ilf3	Interleukin enhancer-binding factor 3 OS=Mus musculus OX=10090 GN=Ilf3 PE=1 SV=2	22		1.05954	0.218637	0.072234	0.555234	0.134534	19.3477	19.7252	18.4321	18.959	18.5622	18.3916	22	18	30.3	113.418	3	0	1	1	1	0	0
Q9JII5	DAZ-associated protein 1	Dazap1	DAZ-associated protein 1 OS=Mus musculus OX=10090 GN=Dazap1 PE=1 SV=2	4		1.03612	0.728681	0.409452	0.482967	0.740991	18.8	17.3838	17.5522	18.0167	16.348	17.7636	4	4	17	105.864	0	0	0	0	0	0	0
P62301	40S ribosomal protein S13	Rps13	40S ribosomal protein S13 OS=Mus musculus OX=10090 GN=Rps13 PE=1 SV=2	4		1.01851	0.892481	0.196422	0.121435	0.774975	21.0532	21.7063	21.4313	21.0761	20.3809	20.3416	4	4	25.2	125.989	8	0	2	3	2	1	0
Q99JX7	Nuclear RNA export factor 1	Nxf1	Nuclear RNA export factor 1 OS=Mus musculus OX=10090 GN=Nxf1 PE=1 SV=3	7		1.01125	0.1955	0.0209073	0.106417	0.00575025	19.8966	19.9869	19.0866	19.1654	18.9195	18.9415	7	7	18.1	115.996	3	1	2	0	0	0	0
Q569Z6	Thyroid hormone receptor-associated protein 3	Thrap3	Thyroid hormone receptor-associated protein 3 OS=Mus musculus OX=10090 GN=Thrap3 PE=1 SV=1	8		0.985826	1.36662	0.0569779	0.0219229	0.22786	21.1968	20.9075	21.4177	21.4482	20.1297	20.0029	8	8	10.3	125.103	14	1	0	6	6	0	1
Q62376	U1 small nuclear ribonucleoprotein 70 kDa	Snrnp70	U1 small nuclear ribonucleoprotein 70 kDa OS=Mus musculus OX=10090 GN=Snrnp70 PE=1 SV=2	10		0.982163	0.000729561	0.0977013	0.976661	0.094028	22.9452	23.2512	22.0973	22.1362	22.1086	22.1234	10	10	27	134.662	16	2	3	3	2	3	3
P26369	Splicing factor U2AF 65 kDa subunit	U2af2	Splicing factor U2AF 65 kDa subunit OS=Mus musculus OX=10090 GN=U2af2 PE=1 SV=3	6		0.978909	-0.171275	0.0697328	0.143262	0.0646117	21.0166	20.7124	19.6696	19.759	19.8302	19.9409	6	6	26.5	120.929	3	1	0	0	1	0	1
Q9D1N9	39S ribosomal protein L21, mitochondrial	Mrpl21	39S ribosomal protein L21, mitochondrial OS=Mus musculus OX=10090 GN=Mrpl21 PE=1 SV=1	6		0.964666	1.07258	0.118744	0.128451	0.511323	17.1279	17.3533	17.4117	17.2853	16.526	16.0258	6	6	31.1	101.73	0	0	0	0	0	0	0
Q99LE6	ATP-binding cassette sub-family F member 2	Abcf2	ATP-binding cassette sub-family F member 2 OS=Mus musculus OX=10090 GN=Abcf2 PE=1 SV=1	4		0.954223	0.423807	0.205125	0.416006	0.0207132	20.8095	20.7117	20.2873	20.1732	19.4771	20.1357	4	4	7.8	121.594	7	2	1	1	1	1	1
Q6ZWV7	60S ribosomal protein L35	Rpl35	60S ribosomal protein L35 OS=Mus musculus OX=10090 GN=Rpl35 PE=1 SV=1	2		0.94136	0.68044	0.0127713	0.0680016	0.261373	21.5546	21.4172	21.0928	21.3572	20.6232	20.4659	2	2	18.7	126.511	2	0	0	0	2	0	0
Q9CX86	Heterogeneous nuclear ribonucleoprotein A0	Hnrnpa0	Heterogeneous nuclear ribonucleoprotein A0 OS=Mus musculus OX=10090 GN=Hnrnpa0 PE=1 SV=1	5		0.940158	-0.00507164	0.0373359	0.983503	0.0556119	22.0095	22.2245	21.3385	21.005	21.0387	21.315	5	5	21.6	128.931	10	1	2	1	3	0	3
O70133	ATP-dependent RNA helicase A	Dhx9	ATP-dependent RNA helicase A OS=Mus musculus OX=10090 GN=Dhx9 PE=1 SV=2	41		0.934632	0.25639	0.096439	0.249431	0.194054	21.2676	21.7021	20.784	20.8293	20.4392	20.6613	41	41	37.2	125.683	18	2	4	2	8	2	0
Q3U0V1	Far upstream element-binding protein 2	Khsrp	Far upstream element-binding protein 2 OS=Mus musculus OX=10090 GN=Khsrp PE=1 SV=2	16		0.926896	-1.09171	0.340987	0.274021	0.0452319	18.8025	18.5132	16.3606	16.9179	17.1573	18.3046	16	15	29.9	106.056	0	0	0	0	0	0	0
Q8VEK3	Heterogeneous nuclear ribonucleoprotein U	Hnrnpu	Heterogeneous nuclear ribonucleoprotein U OS=Mus musculus OX=10090 GN=Hnrnpu PE=1 SV=1	27		0.916101	0.424657	0.094269	0.142533	0.112009	21.9043	22.1777	21.4528	21.6463	21.1233	21.1264	27	27	31	129.431	16	3	4	2	5	0	2
Q62167;P16381	ATP-dependent RNA helicase DDX3X;Putative ATP-dependent RNA helicase Pl10	Ddx3x;D1Pas1	ATP-dependent RNA helicase DDX3X OS=Mus musculus OX=10090 GN=Ddx3x PE=1 SV=3;Putative ATP-dependent RNA helicase Pl10 OS=Mus musculus OX=10090 GN=D1Pas1 PE=1 SV=1	13		0.912052	-0.0312176	0.0668063	0.754178	0.0305442	22.1193	22.3519	21.3681	21.2166	21.295	21.3521	14	3	28.9	129.703	32	4	7	7	5	4	5
Q3UMQ8	H/ACA ribonucleoprotein complex non-core subunit NAF1	Naf1	H/ACA ribonucleoprotein complex non-core subunit NAF1 OS=Mus musculus OX=10090 GN=Naf1 PE=1 SV=2	2		0.862968	3.44673	0.0496956	0.0138615	0.00748918	17.7085	17.4591	20.3269	20.0083	16.7836	16.6581	2	2	4.9	108.944	2	0	0	1	1	0	0
P62242	40S ribosomal protein S8	Rps8	40S ribosomal protein S8 OS=Mus musculus OX=10090 GN=Rps8 PE=1 SV=2	6		0.860174	1.17088	0.0388638	0.00139251	0.113958	22.091	22.2393	22.4469	22.5049	21.2828	21.3272	6	6	34.6	131.892	17	2	2	4	4	2	3
P23116	Eukaryotic translation initiation factor 3 subunit A	Eif3a	Eukaryotic translation initiation factor 3 subunit A OS=Mus musculus OX=10090 GN=Eif3a PE=1 SV=5	6		0.843483	-0.382541	0.0709743	0.215488	0.0134699	20.9836	21.0958	19.7913	19.836	20.3358	20.0566	6	6	5.8	122.099	9	1	3	1	2	2	0
Q5SUF2	Luc7-like protein 3	Luc7l3	Luc7-like protein 3 OS=Mus musculus OX=10090 GN=Luc7l3 PE=1 SV=1	2		0.839388	-0.171757	0.0501429	0.299693	0.0853639	18.9702	19.247	18.1068	18.0881	18.3575	18.1808	2	2	6.7	110.95	1	0	1	0	0	0	0
P97302	Transcription regulator protein BACH1	Bach1	Transcription regulator protein BACH1 OS=Mus musculus OX=10090 GN=Bach1 PE=1 SV=1	2		0.832235	-1.38376	0.255895	0.628807	0.479552	27.3226	26.6123	26.8495	22.6534	26.1154	26.155	2	2	2.8	155.708	0	0	0	0	0	0	0
Q9QZD9	Eukaryotic translation initiation factor 3 subunit I	Eif3i	Eukaryotic translation initiation factor 3 subunit I OS=Mus musculus OX=10090 GN=Eif3i PE=1 SV=1	3		0.826987	0.135173	0.0691983	0.553137	0.085936	20.1519	19.8736	19.1591	19.4828	19.1258	19.2457	3	3	17.5	117.039	4	1	1	0	2	0	0
Q9CZM2	60S ribosomal protein L15	Rpl15	60S ribosomal protein L15 OS=Mus musculus OX=10090 GN=Rpl15 PE=1 SV=4	5		0.822912	0.939278	0.174181	0.145996	0.589411	21.4596	21.7126	21.5707	21.8343	20.4755	21.051	5	5	24	128.104	9	1	1	2	3	1	1
Q8K3Y3	Protein lin-28 homolog A	Lin28a	Protein lin-28 homolog A OS=Mus musculus OX=10090 GN=Lin28a PE=1 SV=1	3		0.80557	0.901024	0.112878	0.0388657	0.740674	18.6519	18.2149	18.4458	18.6119	17.7559	17.4998	3	3	23.9	109.18	0	0	0	0	0	0	0
P62960	Nuclease-sensitive element-binding protein 1	Ybx1	Y-box-binding protein 1 OS=Mus musculus OX=10090 GN=Ybx1 PE=1 SV=3	5		0.796766	0.437964	0.136588	0.296092	0.375884	20.556	20.4932	19.9227	20.4088	19.9125	19.5431	5	3	30.1	120.836	4	1	1	1	1	0	0
Q80ZS3	28S ribosomal protein S26, mitochondrial	Mrps26	28S ribosomal protein S26, mitochondrial OS=Mus musculus OX=10090 GN=Mrps26 PE=1 SV=1	2		0.789903	0.898726	0.141978	0.0277949	0.730905	16.8272	17.3049	17.2679	17.0818	16.1632	16.3891	2	2	11.5	101.034	0	0	0	0	0	0	0
CON__P02533				3	+	0.768503	0.614688	0.260263	0.302774	0.468238	20.3882	20.2388	20.3028	20.0164	19.1955	19.8944	5	2	13.8	120.036	3	0	1	0	2	0	0
O09167	60S ribosomal protein L21	Rpl21	60S ribosomal protein L21 OS=Mus musculus OX=10090 GN=Rpl21 PE=1 SV=3	2		0.763172	0.803759	0.397698	0.207725	0.955845	20.7007	21.8685	21.2834	21.3671	20.2404	20.8025	2	2	16.2	126.263	2	0	0	1	1	0	0
Q8VC52	RNA-binding protein with multiple splicing 2	Rbpms2	RNA-binding protein with multiple splicing 2 OS=Mus musculus OX=10090 GN=Rbpms2 PE=1 SV=1	6		0.75839	-0.136392	0.621682	0.693713	0.569128	16.6434	18.888	17.1322	16.6096	17.0001	17.0145	6	4	35.9	103.288	0	0	0	0	0	0	0
Q9DBR0	A-kinase anchor protein 8	Akap8	A-kinase anchor protein 8 OS=Mus musculus OX=10090 GN=Akap8 PE=1 SV=1	5		0.733251	0.993806	0.304519	0.0399251	0.625218	17.8605	17.0779	17.5996	17.8599	16.8069	16.665	5	5	11.1	103.87	0	0	0	0	0	0	0
P27659	60S ribosomal protein L3	Rpl3	60S ribosomal protein L3 OS=Mus musculus OX=10090 GN=Rpl3 PE=1 SV=3	8		0.732844	1.00718	0.16556	0.018891	0.435523	21.5638	22.031	21.9689	22.1746	20.9808	21.1484	8	8	26.6	129.867	13	1	4	3	3	0	2
P97351	40S ribosomal protein S3a	Rps3a	40S ribosomal protein S3a OS=Mus musculus OX=10090 GN=Rps3a PE=1 SV=3	8		0.711584	1.69065	0.0455553	0.0557802	0.0647643	20.948	21.0938	21.839	22.161	20.3328	20.2859	8	8	30.7	126.66	5	0	0	3	2	0	0
P43274	Histone H1.4	Hist1h1e	Histone H1.4 OS=Mus musculus OX=10090 GN=H1-4 PE=1 SV=2	2		0.706451	3.42978	0.796767	0.191814	0.394015	16.3794	20.3628	20.6423	21.5466	18.9127	16.4166	5	2	25.1	114.26	1	0	0	0	1	0	0
P13864	DNA (cytosine-5)-methyltransferase 1	Dnmt1	DNA (cytosine-5)-methyltransferase 1 OS=Mus musculus OX=10090 GN=Dnmt1 PE=1 SV=5	6		0.70365	1.52771	0.0828287	0.00742594	0.0558323	19.0075	19.0263	19.9178	19.7642	18.4082	18.2183	6	6	5.6	114.342	0	0	0	0	0	0	0
Q7TNC4	Putative RNA-binding protein Luc7-like 2	Luc7l2	Putative RNA-binding protein Luc7-like 2 OS=Mus musculus OX=10090 GN=Luc7l2 PE=1 SV=1	2		0.703562	-0.441981	0.225676	0.783798	0.52575	18.2842	18.5352	18.5097	16.0187	18.0098	17.4025	2	2	6.1	106.76	0	0	0	0	0	0	0
Q9CYI4	Putative RNA-binding protein Luc7-like 1	Luc7l	Putative RNA-binding protein Luc7-like 1 OS=Mus musculus OX=10090 GN=Luc7l PE=1 SV=2	3		0.696223	-0.307548	0.0544036	0.136031	0.0706433	19.085	19.3233	18.1841	18.2167	18.4342	18.5817	3	3	9.4	111.825	2	0	1	0	1	0	0
P62317	Small nuclear ribonucleoprotein Sm D2	Snrpd2	Small nuclear ribonucleoprotein Sm D2 OS=Mus musculus OX=10090 GN=Snrpd2 PE=1 SV=1	3		0.668316	-0.056983	0.390293	0.925056	0.0879535	21.4309	21.637	20.8001	20.8172	20.3838	21.3474	3	3	29.7	126.417	4	0	1	0	2	0	1
Q60668	Heterogeneous nuclear ribonucleoprotein D0	Hnrnpd	Heterogeneous nuclear ribonucleoprotein D0 OS=Mus musculus OX=10090 GN=Hnrnpd PE=1 SV=2	7		0.665707	-0.326016	0.0408342	0.0889761	0.0287225	21.4156	21.6207	20.4719	20.581	20.7741	20.9308	8	7	19.4	125.794	5	0	1	1	1	1	1
Q8CCS6	Polyadenylate-binding protein 2	Pabpn1	Polyadenylate-binding protein 2 OS=Mus musculus OX=10090 GN=Pabpn1 PE=1 SV=3	5		0.662154	0.840684	0.638967	0.54865	0.832899	17.5365	18.8652	18.408	18.3508	16.5584	18.519	5	5	29.8	108.238	0	0	0	0	0	0	0
Q6NVF9	Cleavage and polyadenylation specificity factor subunit 6	Cpsf6	Cleavage and polyadenylation specificity factor subunit 6 OS=Mus musculus OX=10090 GN=Cpsf6 PE=1 SV=1	3		0.660273	-0.605336	0.0860607	0.080366	0.0588522	19.5718	19.6306	18.4732	18.198	19.0498	18.832	3	3	9.4	113.755	1	0	1	0	0	0	0
P63325	40S ribosomal protein S10	Rps10	40S ribosomal protein S10 OS=Mus musculus OX=10090 GN=Rps10 PE=1 SV=1	4		0.652813	0.408679	0.210397	0.27724	0.537903	19.8937	20.4495	19.8633	19.9916	19.7249	19.3126	4	4	23.6	119.236	1	0	0	0	1	0	0
Q9CPR4	60S ribosomal protein L17	Rpl17	60S ribosomal protein L17 OS=Mus musculus OX=10090 GN=Rpl17 PE=1 SV=3	6		0.6521	0.387774	0.00825053	0.0588472	0.0756524	23.6573	23.7306	23.4862	23.3731	23.0183	23.0653	6	6	32.6	140.331	18	4	3	3	3	2	3
P20152	Vimentin	Vim	Vimentin OS=Mus musculus OX=10090 GN=Vim PE=1 SV=3	5		0.638656	-3.06814	0.553572	0.0307271	0.113969	19.0377	20.5509	15.9149	16.2602	19.1249	19.1864	5	5	13.3	110.075	1	0	1	0	0	0	0
Q9Z2X1	Heterogeneous nuclear ribonucleoprotein F;Heterogeneous nuclear ribonucleoprotein F, N-terminally processed	Hnrnpf	Heterogeneous nuclear ribonucleoprotein F OS=Mus musculus OX=10090 GN=Hnrnpf PE=1 SV=3	10		0.638137	-0.0504484	0.21366	0.86452	0.101689	22.6514	22.6724	22.087	21.8597	22.2471	21.8005	12	10	46	133.318	19	3	4	4	3	3	2
P19253	60S ribosomal protein L13a	Rpl13a	60S ribosomal protein L13a OS=Mus musculus OX=10090 GN=Rpl13a PE=1 SV=4	3		0.637851	0.0866985	0.292886	0.702565	0.336061	22.0919	22.7892	21.7461	22.0327	21.9374	21.668	3	3	16.3	132.265	11	2	2	1	2	2	2
P62270	40S ribosomal protein S18	Rps18	40S ribosomal protein S18 OS=Mus musculus OX=10090 GN=Rps18 PE=1 SV=3	5		0.626689	0.0749731	0.0682537	0.680722	0.0558146	19.9732	20.1766	19.4414	19.605	19.5778	19.3186	5	5	32.2	118.093	6	0	1	1	2	1	1
P62900	60S ribosomal protein L31	Rpl31	60S ribosomal protein L31 OS=Mus musculus OX=10090 GN=Rpl31 PE=1 SV=1	2		0.626618	0.710091	0.0892145	0.108833	0.692311	21.2726	21.4979	21.3268	21.6106	20.723	20.7942	2	2	15.2	127.225	1	0	0	0	1	0	0
P41105	60S ribosomal protein L28	Rpl28	60S ribosomal protein L28 OS=Mus musculus OX=10090 GN=Rpl28 PE=1 SV=2	4		0.624181	0.647155	0.289454	0.0929503	0.955187	21.1168	21.7479	21.5924	21.3183	20.7485	20.8678	4	4	24.1	127.392	6	0	2	2	1	0	1
P62315	Small nuclear ribonucleoprotein Sm D1	Snrpd1	Small nuclear ribonucleoprotein Sm D1 OS=Mus musculus OX=10090 GN=Snrpd1 PE=1 SV=1	3		0.614081	0.0553331	0.235018	0.856207	0.260768	21.5543	22.0938	21.4997	21.0309	21.3092	21.1107	3	3	37	128.599	15	1	3	4	3	2	2
Q8VDD5	Myosin-9	Myh9	Myosin-9 OS=Mus musculus OX=10090 GN=Myh9 PE=1 SV=4	6		0.601302	-0.183651	0.213386	0.459615	0.144875	21.0083	20.4981	20.123	19.8136	20.2797	20.0242	6	6	4.3	121.747	14	2	3	3	3	1	2
P62267	40S ribosomal protein S23	Rps23	40S ribosomal protein S23 OS=Mus musculus OX=10090 GN=Rps23 PE=1 SV=3	5		0.597871	0.0604553	0.408517	0.958109	0.648512	21.8405	21.9572	20.4888	22.2342	20.8503	21.7518	5	5	29.4	129.123	8	1	1	0	2	1	3
P62852	40S ribosomal protein S25	Rps25	40S ribosomal protein S25 OS=Mus musculus OX=10090 GN=Rps25 PE=1 SV=1	3		0.56898	2.09728	0.401359	0.0124643	0.170303	20.7407	19.9011	21.8346	21.8637	19.6926	19.8112	3	3	16	123.844	4	1	0	2	1	0	0
O70194	Eukaryotic translation initiation factor 3 subunit D	Eif3d	Eukaryotic translation initiation factor 3 subunit D OS=Mus musculus OX=10090 GN=Eif3d PE=1 SV=2	4		0.562341	0.199984	0.108407	0.373954	0.0958214	20.4849	20.5992	20.173	20.1864	19.8464	20.1131	4	4	10.9	121.403	3	0	0	0	2	0	1
P62849	40S ribosomal protein S24	Rps24	40S ribosomal protein S24 OS=Mus musculus OX=10090 GN=Rps24 PE=1 SV=1	4		0.540154	1.42541	0.249353	0.0562432	0.0580649	20.7762	20.9139	21.8708	21.5898	20.547	20.0628	4	4	35.3	125.76	9	0	2	2	3	1	1
P24547	Inosine-5-monophosphate dehydrogenase 2	Impdh2	Inosine-5-monophosphate dehydrogenase 2 OS=Mus musculus OX=10090 GN=Impdh2 PE=1 SV=2	2		0.537519	-0.133223	0.144379	0.588256	0.115002	19.384	19.6291	18.8345	18.8371	19.1454	18.7926	2	2	4.9	114.623	2	0	0	1	0	0	1
Q9CXW2	28S ribosomal protein S22, mitochondrial	Mrps22	28S ribosomal protein S22, mitochondrial OS=Mus musculus OX=10090 GN=Mrps22 PE=1 SV=1	8		0.524073	0.24383	0.221415	0.591155	0.539084	17.1074	17.0635	16.4879	17.1225	16.7549	16.3679	8	8	29.5	100.904	0	0	0	0	0	0	0
Q60817;P70670	Nascent polypeptide-associated complex subunit alpha;Nascent polypeptide-associated complex subunit alpha, muscle-specific form	Naca	Nascent polypeptide-associated complex subunit alpha OS=Mus musculus OX=10090 GN=Naca PE=1 SV=1;Nascent polypeptide-associated complex subunit alpha, muscle-specific form OS=Mus musculus OX=10090 GN=Naca PE=1 SV=2	2		0.48806	0.164219	0.213004	0.354237	0.290972	19.4953	19.8579	19.2437	19.4619	19.1482	19.229	2	2	13.5	116.436	3	0	0	1	1	0	1
Q8K224	N-acetyltransferase 10	Nat10	RNA cytidine acetyltransferase OS=Mus musculus OX=10090 GN=Nat10 PE=1 SV=1	2		0.482622	1.14	0.720876	0.35985	0.600618	16.2545	18.0709	17.7189	17.9213	17.4128	15.9474	2	2	3.7	103.326	0	0	0	0	0	0	0
P62702	40S ribosomal protein S4, X isoform	Rps4x	40S ribosomal protein S4, X isoform OS=Mus musculus OX=10090 GN=Rps4x PE=1 SV=2	8		0.476974	0.611305	0.621083	0.107259	0.881117	21.0015	22.4145	21.6767	22.008	21.3572	21.1048	8	8	29.3	129.563	9	0	3	2	3	1	0
Q6ZWN5	40S ribosomal protein S9	Rps9	40S ribosomal protein S9 OS=Mus musculus OX=10090 GN=Rps9 PE=1 SV=3	7		0.468637	0.240329	0.545378	0.735742	0.293784	22.2416	22.474	22.1114	22.1475	21.3438	22.4345	7	7	28.4	132.753	12	2	2	1	4	0	3
Q9WVB0	RNA-binding protein with multiple splicing	Rbpms	RNA-binding protein with multiple splicing OS=Mus musculus OX=10090 GN=Rbpms PE=1 SV=2	3		0.446536	-1.57713	0.488698	0.113327	0.0536355	18.3685	18.7965	16.9029	16.2148	18.5775	17.6945	5	3	34.5	106.555	0	0	0	0	0	0	0
Q3UYV9	Nuclear cap-binding protein subunit 1	Ncbp1	Nuclear cap-binding protein subunit 1 OS=Mus musculus OX=10090 GN=Ncbp1 PE=1 SV=2	4		0.431437	0.580875	0.0946713	0.194861	0.625442	19.0823	18.9659	19.3984	18.9487	18.6953	18.49	4	4	7.1	113.581	1	0	0	1	0	0	0
Q68FD5	Clathrin heavy chain 1	Cltc	Clathrin heavy chain 1 OS=Mus musculus OX=10090 GN=Cltc PE=1 SV=3	4		0.420051	-1.28931	0.810297	0.29369	0.418671	18.694	21.3345	18.2997	18.31	18.9532	20.2351	4	4	3.6	115.827	4	0	3	0	0	0	1
Q8VH51	RNA-binding protein 39	Rbm39	RNA-binding protein 39 OS=Mus musculus OX=10090 GN=Rbm39 PE=1 SV=2	5		0.399492	-0.302697	0.26506	0.431643	0.147109	20.3761	20.6585	20.0461	19.5842	20.3229	19.9127	5	5	12.6	120.9	2	0	1	0	1	0	0
CON__P02769				27	+	0.39431	-0.203533	0.601989	0.777397	0.420316	30.8018	29.9424	30.1842	29.3642	30.4541	29.5014	27	23	35.7	180.248	419	78	62	79	58	79	63
P43276	Histone H1.5	Hist1h1b	Histone H1.5 OS=Mus musculus OX=10090 GN=H1-5 PE=1 SV=2	3		0.393559	1.0497	0.689459	0.359958	0.341193	21.8541	21.1013	21.761	22.5067	20.363	21.8052	4	3	20.6	129.391	8	1	0	2	3	0	2
Q6ZWX6	Eukaryotic translation initiation factor 2 subunit 1	Eif2s1	Eukaryotic translation initiation factor 2 subunit 1 OS=Mus musculus OX=10090 GN=Eif2s1 PE=1 SV=3	3		0.384758	0.297127	0.634341	0.358565	0.908106	19.3646	20.5537	19.6834	20.0597	19.5626	19.5863	3	3	14.6	118.81	5	0	1	0	3	0	1
Q02053	Ubiquitin-like modifier-activating enzyme 1	Uba1	Ubiquitin-like modifier-activating enzyme 1 OS=Mus musculus OX=10090 GN=Uba1 PE=1 SV=1	8		0.384733	-1.17855	0.798524	0.156402	0.401117	20.1904	22.54	20.0989	19.5049	20.9952	20.9657	8	8	12	124.295	12	0	9	0	0	1	2
Q3UKJ7	WD40 repeat-containing protein SMU1;WD40 repeat-containing protein SMU1, N-terminally processed	Smu1	WD40 repeat-containing protein SMU1 OS=Mus musculus OX=10090 GN=Smu1 PE=2 SV=2	2		0.378971	1.62846	0.845028	0.219694	0.551387	16.4178	19.3735	18.8926	19.3977	18.191	16.8425	2	2	6	109.115	1	0	0	0	1	0	0
P43277	Histone H1.3	Hist1h1d	Histone H1.3 OS=Mus musculus OX=10090 GN=H1-3 PE=1 SV=2	3		0.37661	1.2878	0.701257	0.302254	0.305785	22.6575	22.5024	23.0055	23.9768	21.4604	22.9462	5	1	25.3	136.549	9	2	1	1	2	2	1
P56959	RNA-binding protein FUS	Fus	RNA-binding protein FUS OS=Mus musculus OX=10090 GN=Fus PE=1 SV=1	8		0.363827	-0.350652	0.477785	0.755388	0.55318	21.1866	21.5888	19.8204	21.526	21.3689	20.6788	8	8	18.1	126.17	6	0	1	1	3	1	0
Q99ME9	Nucleolar GTP-binding protein 1	Gtpbp4	Nucleolar GTP-binding protein 1 OS=Mus musculus OX=10090 GN=Gtpbp4 PE=1 SV=3	5		0.359094	1.7647	0.883724	0.459819	0.518311	16.4227	19.4187	19.0981	19.5545	15.9938	19.1294	5	5	9.8	109.617	1	0	0	0	1	0	0
O88477	Insulin-like growth factor 2 mRNA-binding protein 1	Igf2bp1	Insulin-like growth factor 2 mRNA-binding protein 1 OS=Mus musculus OX=10090 GN=Igf2bp1 PE=1 SV=1	17		0.355389	0.145387	0.480211	0.618915	0.661006	21.0712	21.7496	21.4141	20.9868	21.1324	20.9777	17	16	35.4	127.332	17	1	4	3	6	1	2
P01868;P01869	Ig gamma-1 chain C region secreted form;Ig gamma-1 chain C region, membrane-bound form	Ighg1	Ig gamma-1 chain C region secreted form OS=Mus musculus OX=10090 GN=Ighg1 PE=1 SV=1;Ig gamma-1 chain C region, membrane-bound form OS=Mus musculus OX=10090 GN=Ighg1 PE=1 SV=2	7		0.35105	0.0620832	0.174251	0.858285	0.463008	28.7308	28.8809	28.7803	28.2534	28.3252	28.5844	7	7	26.2	171.555	85	14	16	15	13	12	15
P97379	Ras GTPase-activating protein-binding protein 2	G3bp2	Ras GTPase-activating protein-binding protein 2 OS=Mus musculus OX=10090 GN=G3bp2 PE=1 SV=2	4		0.342422	0.0929441	0.390619	0.640514	0.497115	19.8839	20.383	20.0294	19.7385	19.7252	19.8569	5	4	11	119.617	4	0	1	1	1	1	0
P62830	60S ribosomal protein L23	Rpl23	60S ribosomal protein L23 OS=Mus musculus OX=10090 GN=Rpl23 PE=1 SV=1	3		0.340015	0.498433	0.729732	0.621979	0.705653	21.6306	22.2662	22.0434	22.1703	20.8694	22.3474	3	3	23.6	131.327	4	0	1	1	2	0	0
P63323	40S ribosomal protein S12	Rps12	40S ribosomal protein S12 OS=Mus musculus OX=10090 GN=Rps12 PE=1 SV=2	3		0.337303	0.736349	0.376508	0.12791	0.348642	19.9627	20.4476	20.3834	20.8249	20.0069	19.7288	3	3	30.3	121.354	1	0	0	0	1	0	0
Q6PB66	Leucine-rich PPR motif-containing protein, mitochondrial	Lrpprc	Leucine-rich PPR motif-containing protein, mitochondrial OS=Mus musculus OX=10090 GN=Lrpprc PE=1 SV=2	20		0.328296	-0.070941	0.753382	0.940382	0.551106	16.7564	17.6995	16.9052	16.7523	17.6541	16.1453	20	20	19.2	101.913	0	0	0	0	0	0	0
Q99MN1	Lysine--tRNA ligase	Kars	Lysine--tRNA ligase OS=Mus musculus OX=10090 GN=Kars1 PE=1 SV=1	4		0.326023	0.168347	0.304395	0.57896	0.535126	18.987	19.1177	18.7157	19.0736	18.5426	18.91	4	4	7.2	113.346	2	0	1	0	1	0	0
Q3UEB3	Poly(U)-binding-splicing factor PUF60	Puf60	Poly(U)-binding-splicing factor PUF60 OS=Mus musculus OX=10090 GN=Puf60 PE=1 SV=2	3		0.325047	-0.209231	0.386847	0.307247	0.258587	18.9624	18.48	18.1357	18.2382	18.5172	18.2751	3	3	7.8	110.609	0	0	0	0	0	0	0
Q3TUF7	YEATS domain-containing protein 2	Yeats2	YEATS domain-containing protein 2 OS=Mus musculus OX=10090 GN=Yeats2 PE=1 SV=2	2		0.316092	0.110921	0.16997	0.566912	0.305976	30.1722	29.9896	29.7595	29.992	29.8794	29.6502	2	2	2	179.443	1	0	0	0	1	0	0
P84099	60S ribosomal protein L19	Rpl19	60S ribosomal protein L19 OS=Mus musculus OX=10090 GN=Rpl19 PE=1 SV=1	2		0.312561	0.12133	0.610641	0.83283	0.394632	21.2758	21.5362	21.094	21.3354	21.5414	20.6454	2	2	13.3	127.428	7	1	2	1	1	1	1
Q6ZQ58	La-related protein 1	Larp1	La-related protein 1 OS=Mus musculus OX=10090 GN=Larp1 PE=1 SV=3	2		0.293512	0.774073	0.752486	0.105804	0.621177	16.5452	17.9709	17.9238	17.5534	17.165	16.7641	2	2	2.8	103.922	0	0	0	0	0	0	0
B2RQC6	CAD protein;Glutamine-dependent carbamoyl-phosphate synthase;Aspartate carbamoyltransferase;Dihydroorotase	Cad	CAD protein OS=Mus musculus OX=10090 GN=Cad PE=1 SV=1	8		0.287452	-0.475713	0.207012	0.0687301	0.0724006	20.1377	20.1355	19.2862	19.4606	19.7522	19.9461	8	8	4.8	118.718	3	0	0	1	1	0	1
Q6ZWV3;P86048	60S ribosomal protein L10;60S ribosomal protein L10-like	Rpl10;Rpl10l	60S ribosomal protein L10 OS=Mus musculus OX=10090 GN=Rpl10 PE=1 SV=3;60S ribosomal protein L10-like OS=Mus musculus OX=10090 GN=Rpl10l PE=2 SV=1	5		0.283025	0.221272	0.481539	0.416304	0.866454	21.7896	22.3346	21.8429	22.1579	21.9291	21.6291	5	5	21	131.683	8	0	2	1	1	2	2
Q62383	Transcription elongation factor SPT6	Supt6h	Transcription elongation factor SPT6 OS=Mus musculus OX=10090 GN=Supt6h PE=1 SV=2	2		0.280003	2.55078	0.147396	0.0302514	0.0537062	16.5234	16.4466	18.9721	18.5394	16.2909	16.1191	2	2	1.7	102.892	0	0	0	0	0	0	0
O88508	DNA (cytosine-5)-methyltransferase 3A	Dnmt3a	DNA (cytosine-5)-methyltransferase 3A OS=Mus musculus OX=10090 GN=Dnmt3a PE=1 SV=2	3		0.267164	0.0565186	0.345969	0.722987	0.436252	18.0281	18.3742	18.0082	17.9728	18.0555	17.8124	3	3	3.9	108.251	0	0	0	0	0	0	0
P29341	Polyadenylate-binding protein 1	Pabpc1	Polyadenylate-binding protein 1 OS=Mus musculus OX=10090 GN=Pabpc1 PE=1 SV=2	17		0.26611	0.0892982	0.284447	0.511926	0.422436	20.4538	20.7394	20.5112	20.3284	20.27	20.391	17	17	35.4	122.694	14	1	3	3	4	1	2
Q99N87	28S ribosomal protein S5, mitochondrial	Mrps5	28S ribosomal protein S5, mitochondrial OS=Mus musculus OX=10090 GN=Mrps5 PE=1 SV=1	4		0.263575	-0.143512	0.816896	0.870881	0.671436	16.0854	17.5212	16.3145	16.4779	15.8428	17.2367	4	4	11.3	99.4786	0	0	0	0	0	0	0
Q921F2	TAR DNA-binding protein 43	Tardbp	TAR DNA-binding protein 43 OS=Mus musculus OX=10090 GN=Tardbp PE=1 SV=1	10		0.253379	-0.221275	0.766144	0.471511	0.600313	19.7679	21.0838	19.7425	20.1599	20.0841	20.2609	10	10	29.2	121.099	5	0	2	1	2	0	0
P43275	Histone H1.1	Hist1h1a	Histone H1.1 OS=Mus musculus OX=10090 GN=H1-1 PE=1 SV=2	6		0.251513	1.39365	0.759547	0.25479	0.0484068	22.9696	23.1509	24.0337	24.371	22.1753	23.4422	6	4	36.2	140.143	13	1	1	4	4	1	2
Q8BJZ4	28S ribosomal protein S35, mitochondrial	Mrps35	28S ribosomal protein S35, mitochondrial OS=Mus musculus OX=10090 GN=Mrps35 PE=1 SV=2	2		0.243984	-0.563401	0.380567	0.221104	0.118563	17.6294	17.2742	16.4116	16.8772	17.2912	17.1244	2	2	8.1	102.608	0	0	0	0	0	0	0
P57776	Elongation factor 1-delta	Eef1d	Elongation factor 1-delta OS=Mus musculus OX=10090 GN=Eef1d PE=1 SV=3	4		0.242556	-0.492946	0.476233	0.183895	0.131613	21.0335	21.4479	20.411	20.5994	20.8125	21.1839	4	4	16.4	125.488	10	1	3	1	2	1	2
Q8VDW0	ATP-dependent RNA helicase DDX39A	Ddx39a	ATP-dependent RNA helicase DDX39A OS=Mus musculus OX=10090 GN=Ddx39a PE=1 SV=1	9		0.231563	0.141896	0.551376	0.531417	0.795789	21.8328	22.3723	21.9893	22.0364	22.0284	21.7135	9	3	23.7	131.973	9	1	1	2	3	1	1
Q64152	Transcription factor BTF3	Btf3	Transcription factor BTF3 OS=Mus musculus OX=10090 GN=Btf3 PE=1 SV=3	2		0.224665	0.586866	0.400385	0.0878181	0.232815	18.5207	18.1936	18.5867	18.8519	18.2635	18.0015	2	2	20.1	110.418	0	0	0	0	0	0	0
Q9D6Z1	Nucleolar protein 56	Nop56	Nucleolar protein 56 OS=Mus musculus OX=10090 GN=Nop56 PE=1 SV=2	7		0.224218	0.778789	0.60463	0.0735699	0.298828	19.0605	19.6903	20.0768	19.7832	19.0787	19.2236	7	7	15.3	116.913	6	0	1	2	2	0	1
P14131	40S ribosomal protein S16	Rps16	40S ribosomal protein S16 OS=Mus musculus OX=10090 GN=Rps16 PE=1 SV=4	7		0.223235	0.428929	0.661261	0.385779	0.637853	21.5706	22.2141	22.0933	22.1028	21.3718	21.9664	7	7	43.8	131.319	11	0	3	3	4	0	1
P35550	rRNA 2-O-methyltransferase fibrillarin	Fbl	rRNA 2-O-methyltransferase fibrillarin OS=Mus musculus OX=10090 GN=Fbl PE=1 SV=2	8		0.221933	0.67029	0.248688	0.0346375	0.0896412	21.9589	22.1723	22.4193	22.6087	21.9254	21.762	8	8	29.7	132.847	20	1	3	3	7	2	4
Q8CGP2;Q8CGP1;Q6ZWY9;Q64525;Q64478;Q64475;P10854;P10853	Histone H2B type 1-P;Histone H2B type 1-K;Histone H2B type 1-C/E/G;Histone H2B type 2-B;Histone H2B type 1-H;Histone H2B type 1-B;Histone H2B type 1-M;Histone H2B type 1-F/J/L	Hist1h2bp;Hist1h2bk;Hist1h2bc;Hist2h2bb;Hist1h2bh;Hist1h2bb;Hist1h2bm;Hist1h2bf	Histone H2B type 1-P OS=Mus musculus OX=10090 GN=Hist1h2bp PE=1 SV=3;Histone H2B type 1-K OS=Mus musculus OX=10090 GN=H2bc12 PE=1 SV=3;Histone H2B type 1-C/E/G OS=Mus musculus OX=10090 GN=H2bc4 PE=1 SV=3;Histone H2B type 2-B OS=Mus musculus OX=10090 GN=His	5		0.215636	1.57504	0.467897	0.0477567	0.0623563	25.6812	26.0163	26.9502	27.4661	25.8084	25.4578	5	5	34.1	157.38	21	2	3	6	4	3	3
Q8K310	Matrin-3	Matr3	Matrin-3 OS=Mus musculus OX=10090 GN=Matr3 PE=1 SV=1	26		0.204815	-0.0369902	0.373857	0.903047	0.473251	20.334	20.2913	20.2939	19.8478	20.2462	19.9694	26	26	43.3	120.983	12	1	1	4	5	0	1
P60867	40S ribosomal protein S20	Rps20	40S ribosomal protein S20 OS=Mus musculus OX=10090 GN=Rps20 PE=1 SV=1	2		0.202721	0.443054	0.602035	0.334828	0.311749	22.0489	22.2143	22.5153	22.2286	21.6463	22.2115	2	2	19.3	132.865	10	1	2	2	2	2	1
P67984	60S ribosomal protein L22	Rpl22	60S ribosomal protein L22 OS=Mus musculus OX=10090 GN=Rpl22 PE=1 SV=2	2		0.20015	0.058857	0.528986	0.436032	0.636825	21.0049	21.4465	21.0377	21.1311	21.0639	20.9872	2	2	18.8	126.671	5	1	1	0	2	0	1
F7BJB9		Morc3	MORC family CW-type zinc finger protein 3 OS=Mus musculus OX=10090 GN=Morc3 PE=1 SV=1	4		0.194134	0.238883	0.704192	0.623595	0.934815	19.6631	20.3775	20.3915	19.7385	19.5759	20.0764	4	4	6.4	119.823	4	0	2	1	0	0	1
Q9CQF3	Cleavage and polyadenylation specificity factor subunit 5	Nudt21	Cleavage and polyadenylation specificity factor subunit 5 OS=Mus musculus OX=10090 GN=Nudt21 PE=1 SV=1	5		0.184681	-0.563145	0.500773	0.12823	0.0864424	19.5853	19.2653	18.5965	18.7584	19.0801	19.4011	5	5	36.1	114.687	1	0	0	0	0	0	1
Q05CL8	La-related protein 7	Larp7	La-related protein 7 OS=Mus musculus OX=10090 GN=Larp7 PE=1 SV=2	4		0.181614	0.439418	0.676795	0.400434	0.313021	18.111	18.4004	18.5491	18.4779	17.7521	18.396	4	4	8.6	109.687	0	0	0	0	0	0	0
Q91VC3	Eukaryotic initiation factor 4A-III;Eukaryotic initiation factor 4A-III, N-terminally processed	Eif4a3	Eukaryotic initiation factor 4A-III OS=Mus musculus OX=10090 GN=Eif4a3 PE=1 SV=3	9		0.17319	0.427787	0.639346	0.212075	0.502078	20.3735	20.8921	20.8328	20.9419	20.2923	20.6269	10	9	27	123.959	7	0	1	2	2	0	2
Q99PV0	Pre-mRNA-processing-splicing factor 8	Prpf8	Pre-mRNA-processing-splicing factor 8 OS=Mus musculus OX=10090 GN=Prpf8 PE=1 SV=2	15		0.169338	-0.246078	0.450199	0.478294	0.288113	20.0342	20.325	19.9944	19.5339	19.9949	20.0255	15	15	8.6	119.908	6	0	1	3	1	0	1
P60843	Eukaryotic initiation factor 4A-I	Eif4a1	Eukaryotic initiation factor 4A-I OS=Mus musculus OX=10090 GN=Eif4a1 PE=1 SV=1	12		0.167941	-0.0444632	0.657748	0.684369	0.586424	22.2909	22.8544	22.4425	22.278	22.3889	22.4205	12	11	36.5	134.675	41	6	9	9	6	6	5
P47963	60S ribosomal protein L13	Rpl13	60S ribosomal protein L13 OS=Mus musculus OX=10090 GN=Rpl13 PE=1 SV=3	6		0.166264	-0.12216	0.61955	0.679114	0.434397	22.0363	22.4883	21.7836	22.1641	22.265	21.9271	6	6	28.4	132.664	12	2	3	2	2	2	1
Q6DFW4	Nucleolar protein 58	Nop58	Nucleolar protein 58 OS=Mus musculus OX=10090 GN=Nop58 PE=1 SV=1	9		0.1597	0.516253	0.825874	0.245402	0.635867	19.458	20.5661	20.1691	20.568	19.6109	20.0938	9	9	25	120.466	9	0	1	0	7	0	1
Q8CI11	Guanine nucleotide-binding protein-like 3	Gnl3	Guanine nucleotide-binding protein-like 3 OS=Mus musculus OX=10090 GN=Gnl3 PE=1 SV=2	5		0.157744	1.05274	0.738682	0.198732	0.0274239	18.6077	18.8199	19.5363	19.6813	18.9167	18.1954	5	5	12.3	113.757	3	0	0	0	2	0	1
Q8R1B4	Eukaryotic translation initiation factor 3 subunit C	Eif3c	Eukaryotic translation initiation factor 3 subunit C OS=Mus musculus OX=10090 GN=Eif3c PE=1 SV=1	2		0.151113	-0.13912	0.567214	0.93313	0.861883	18.9692	19.0919	20.0568	17.4239	19.0684	18.6906	2	2	2.2	113.301	3	0	1	1	1	0	0
Q99N96	39S ribosomal protein L1, mitochondrial	Mrpl1	39S ribosomal protein L1, mitochondrial OS=Mus musculus OX=10090 GN=Mrpl1 PE=1 SV=2	5		0.150942	-0.268008	0.314014	0.0638076	0.126316	20.047	19.8679	19.5239	19.5531	19.7673	19.8458	5	5	21.4	118.605	0	0	0	0	0	0	0
Q8K019	Bcl-2-associated transcription factor 1	Bclaf1	Bcl-2-associated transcription factor 1 OS=Mus musculus OX=10090 GN=Bclaf1 PE=1 SV=2	5		0.148379	1.51989	0.740942	0.0947831	0.0256299	20.3462	20.0238	21.4019	21.7112	20.3716	19.7017	5	5	7.4	123.556	3	0	0	1	2	0	0
Q8VDT9	39S ribosomal protein L50, mitochondrial	Mrpl50	39S ribosomal protein L50, mitochondrial OS=Mus musculus OX=10090 GN=Mrpl50 PE=1 SV=2	3		0.148287	0.534966	0.859608	0.557929	0.338003	17.31	16.8357	17.6528	17.2662	16.275	17.5741	3	3	34	102.914	0	0	0	0	0	0	0
P25444	40S ribosomal protein S2	Rps2	40S ribosomal protein S2 OS=Mus musculus OX=10090 GN=Rps2 PE=1 SV=3	10		0.144739	-0.0759058	0.374349	0.597231	0.0884765	22.2943	22.3993	22.081	22.1712	22.0984	22.3057	10	10	36.9	133.35	28	5	2	5	5	4	7
P62264	40S ribosomal protein S14	Rps14	40S ribosomal protein S14 OS=Mus musculus OX=10090 GN=Rps14 PE=1 SV=3	6		0.137099	0.309103	0.419504	0.180276	0.244082	22.2534	22.4158	22.4683	22.5449	22.0912	22.3038	6	6	37.7	134.077	19	2	3	4	3	3	4
O88532	Zinc finger RNA-binding protein	Zfr	Zinc finger RNA-binding protein OS=Mus musculus OX=10090 GN=Zfr PE=1 SV=2	12		0.114802	-0.704614	0.817744	0.297883	0.200075	16.5817	16.8542	15.5786	16.2185	16.2189	16.9874	12	12	17.1	98.4393	0	0	0	0	0	0	0
E9PVX6		Mki67	Proliferation marker protein Ki-67 OS=Mus musculus OX=10090 GN=Mki67 PE=1 SV=1	3		0.110926	1.47587	0.952072	0.497465	0.125804	17.1262	16.5766	18.2034	18.2293	15.2763	18.2047	3	3	1.5	103.617	0	0	0	0	0	0	0
Q9CSH3	Exosome complex exonuclease RRP44	Dis3	Exosome complex exonuclease RRP44 OS=Mus musculus OX=10090 GN=Dis3 PE=1 SV=4	5		0.104565	0.0178738	0.715959	0.842123	0.760814	20.55	20.1131	20.3084	20.1813	20.2723	20.1817	5	5	6.5	121.607	3	0	0	0	3	0	0
P62082	40S ribosomal protein S7	Rps7	40S ribosomal protein S7 OS=Mus musculus OX=10090 GN=Rps7 PE=2 SV=1	5		0.0928354	0.807671	0.714868	0.0941676	0.0362543	21.4178	21.617	22.3305	22.134	21.6112	21.2379	5	5	26.8	130.349	9	1	2	3	2	1	0
P14115	60S ribosomal protein L27a	Rpl27a	60S ribosomal protein L27a OS=Mus musculus OX=10090 GN=Rpl27a PE=1 SV=5	2		0.0895967	-0.0348015	0.45631	0.769206	0.412745	22.4819	22.3256	22.1876	22.3711	22.3113	22.317	2	2	14.2	133.995	3	0	1	0	1	1	0
Q8CGC7	Bifunctional glutamate/proline--tRNA ligase;Glutamate--tRNA ligase;Proline--tRNA ligase	Eprs	Bifunctional glutamate/proline--tRNA ligase OS=Mus musculus OX=10090 GN=Eprs1 PE=1 SV=4	6		0.0843124	0.270033	0.840943	0.2878	0.676547	18.5286	19.1863	19.1917	18.8947	18.8455	18.7008	6	6	5.2	113.347	0	0	0	0	0	0	0
P62806	Histone H4	Hist1h4a	Histone H4 OS=Mus musculus OX=10090 GN=H4c1 PE=1 SV=2	9		0.0810814	1.55403	0.84601	0.0817761	0.0899746	24.3965	23.8921	25.2602	25.9743	23.7956	24.3308	9	9	59.2	147.649	42	5	6	9	12	5	5
Q9D0I9	Arginine--tRNA ligase, cytoplasmic	Rars	Arginine--tRNA ligase, cytoplasmic OS=Mus musculus OX=10090 GN=Rars1 PE=1 SV=2	2		0.0720835	-0.0361652	0.390762	0.872114	0.651111	18.3039	18.4055	18.0689	18.4241	18.2841	18.2811	2	2	3.5	109.768	1	0	0	0	1	0	0
P19096	Fatty acid synthase;[Acyl-carrier-protein] S-acetyltransferase;[Acyl-carrier-protein] S-malonyltransferase;3-oxoacyl-[acyl-carrier-protein] synthase;3-oxoacyl-[acyl-carrier-protein] reductase;3-hydroxyacyl-[acyl-carrier-protein] dehydratase;Enoyl-[acyl-carrier-protein] reductase;Oleoyl-[acyl-carrier-protein] hydrolase	Fasn	Fatty acid synthase OS=Mus musculus OX=10090 GN=Fasn PE=1 SV=2	8		0.0714111	-0.715355	0.87181	0.189132	0.21562	19.7706	20.3705	19.3585	19.2091	19.7514	20.2469	8	8	4.9	118.707	9	0	3	1	1	0	4
P62281	40S ribosomal protein S11	Rps11	40S ribosomal protein S11 OS=Mus musculus OX=10090 GN=Rps11 PE=1 SV=3	5		0.0600758	0.367353	0.756287	0.238842	0.141496	21.7714	21.9114	22.1445	22.1528	21.6365	21.9261	5	5	21.5	131.543	13	0	1	4	4	2	2
Q9CQD1;P61021;P35278	Ras-related protein Rab-5A;Ras-related protein Rab-5B;Ras-related protein Rab-5C	Rab5a;Rab5b;Rab5c	Ras-related protein Rab-5A OS=Mus musculus OX=10090 GN=Rab5a PE=1 SV=1;Ras-related protein Rab-5B OS=Mus musculus OX=10090 GN=Rab5b PE=1 SV=1;Ras-related protein Rab-5C OS=Mus musculus OX=10090 GN=Rab5c PE=1 SV=2	2		0.058322	0.13028	0.656287	0.578298	0.737629	21.088	21.0019	21.2809	20.9528	20.8903	21.0829	2	2	10.7	126.297	1	0	0	1	0	0	0
Q8BKS9	Pumilio domain-containing protein KIAA0020	Kiaa0020	Pumilio homolog 3 OS=Mus musculus OX=10090 GN=Pum3 PE=1 SV=2	3		0.0531826	0.230309	0.927217	0.524241	0.757712	16.2942	17.1674	17.0741	16.7418	16.9199	16.4353	3	3	7.4	100.633	0	0	0	0	0	0	0
Q61539	Steroid hormone receptor ERR2	Esrrb	Steroid hormone receptor ERR2 OS=Mus musculus OX=10090 GN=Esrrb PE=1 SV=2	3		0.0528221	-0.108606	0.954957	0.871843	0.845489	20.9288	19.6449	20.3496	19.9012	19.7172	20.7508	3	3	10.2	121.293	5	0	0	1	1	1	2
P14869	60S acidic ribosomal protein P0	Rplp0	60S acidic ribosomal protein P0 OS=Mus musculus OX=10090 GN=Rplp0 PE=1 SV=3	6		0.0423384	-0.175951	0.931166	0.589288	0.649474	21.1383	21.8505	21.3797	21.1726	21.6863	21.2179	6	6	27.1	128.445	12	0	4	2	1	3	2
P54823	Probable ATP-dependent RNA helicase DDX6	Ddx6	Probable ATP-dependent RNA helicase DDX6 OS=Mus musculus OX=10090 GN=Ddx6 PE=1 SV=1	2		0.0403147	-0.212139	0.941343	0.188429	0.665314	17.8398	18.71	18.0157	18.0292	18.1687	18.3005	2	2	5.2	109.064	0	0	0	0	0	0	0
P35979	60S ribosomal protein L12	Rpl12	60S ribosomal protein L12 OS=Mus musculus OX=10090 GN=Rpl12 PE=1 SV=2	3		0.0394793	-0.237875	0.918705	0.290265	0.520886	20.7323	21.3356	20.8823	20.6309	20.8864	21.1025	3	3	24.2	125.57	4	1	0	1	1	1	0
P24270	Catalase	Cat	Catalase OS=Mus musculus OX=10090 GN=Cat PE=1 SV=4	6		0.0370636	-0.475291	0.917362	0.487396	0.460554	20.8036	21.0272	20.8645	19.9416	21.155	20.6017	6	6	17.1	124.394	15	2	2	2	3	2	4
P01837	Ig kappa chain C region		Immunoglobulin kappa constant OS=Mus musculus OX=10090 GN=Igkc PE=1 SV=2	4		0.0209122	0.101686	0.918993	0.911531	0.929316	24.2973	24.1133	25.0093	23.5629	24.3363	24.0325	4	4	38.3	145.352	16	2	2	3	4	2	3
Q9ERK4	Exportin-2	Cse1l	Exportin-2 OS=Mus musculus OX=10090 GN=Cse1l PE=1 SV=1	2		0.0134296	0.0199308	0.964587	0.944965	0.985033	17.1273	16.6805	16.6998	17.1209	16.7539	17.0269	2	2	3.2	101.409	0	0	0	0	0	0	0
P32067	Lupus La protein homolog	Ssb	Lupus La protein homolog OS=Mus musculus OX=10090 GN=Ssb PE=1 SV=1	13		0.0124235	0.0323143	0.981386	0.951732	0.746995	20.7251	20.7371	20.7036	20.7984	20.2939	21.1435	13	13	32	124.402	2	0	1	0	1	0	0
CON__P00761				6	+	0.00396919	-0.277134	0.985285	0.573879	0.570607	32.8993	32.58	32.8118	32.1052	32.8311	32.6402	6	6	25.1	195.868	150	25	22	24	26	24	29
Q91WM1	Spermatid perinuclear RNA-binding protein	Strbp	Spermatid perinuclear RNA-binding protein OS=Mus musculus OX=10090 GN=Strbp PE=1 SV=1	4		0.000923157	-0.159727	0.9993	0.850519	0.845944	17.1541	15.8533	16.2834	16.4028	17.1701	15.8355	8	4	11.9	98.6992	0	0	0	0	0	0	0
Q61584	Fragile X mental retardation syndrome-related protein 1	Fxr1	Fragile X mental retardation syndrome-related protein 1 OS=Mus musculus OX=10090 GN=Fxr1 PE=1 SV=2	7		-0.00298023	-0.000916481	0.990431	0.997058	0.969219	19.9913	20.057	19.992	20.0604	19.8296	20.2247	7	6	16.8	120.155	11	0	2	2	4	1	2
P47962	60S ribosomal protein L5	Rpl5	60S ribosomal protein L5 OS=Mus musculus OX=10090 GN=Rpl5 PE=1 SV=3	3		-0.0118351	0.0468836	0.98784	0.900827	0.937924	19.9396	21.1294	20.4388	20.7477	20.2641	20.8287	3	3	12.5	123.348	6	0	1	2	1	0	2
O35685	Nuclear migration protein nudC	Nudc	Nuclear migration protein nudC OS=Mus musculus OX=10090 GN=Nudc PE=1 SV=1	11		-0.0136776	-0.527401	0.95921	0.329197	0.361111	22.056	21.9955	21.8413	21.1828	22.2521	21.8268	11	11	37.3	131.154	28	4	3	7	4	5	5
Q922P9	Putative oxidoreductase GLYR1	Glyr1	Putative oxidoreductase GLYR1 OS=Mus musculus OX=10090 GN=Glyr1 PE=1 SV=1	2		-0.0274811	0.384432	0.923908	0.254527	0.29667	19.3639	18.9109	19.73	19.3687	19.2276	19.1022	2	2	4.4	115.703	1	0	1	0	0	0	0
P61255	60S ribosomal protein L26	Rpl26	60S ribosomal protein L26 OS=Mus musculus OX=10090 GN=Rpl26 PE=1 SV=1	3		-0.0395813	-0.0732021	0.953877	0.690094	0.961137	20.1425	21.233	20.5158	20.7925	20.7468	20.7078	3	3	12.4	124.138	3	0	1	0	0	1	1
P63101	14-3-3 protein zeta/delta	Ywhaz	14-3-3 protein zeta/delta OS=Mus musculus OX=10090 GN=Ywhaz PE=1 SV=1	2		-0.0416489	0.850987	0.979688	0.62163	0.350681	18.9073	17.7807	19.3491	19.1243	19.6459	17.1255	3	2	14.7	111.933	0	0	0	0	0	0	0
P17225	Polypyrimidine tract-binding protein 1	Ptbp1	Polypyrimidine tract-binding protein 1 OS=Mus musculus OX=10090 GN=Ptbp1 PE=1 SV=2	15		-0.0542698	-0.465183	0.941784	0.248692	0.604836	21.4752	22.6311	21.815	21.4695	22.3305	21.8843	15	13	53.1	131.606	8	0	2	0	4	2	0
Q61545	RNA-binding protein EWS	Ewsr1	RNA-binding protein EWS OS=Mus musculus OX=10090 GN=Ewsr1 PE=1 SV=2	5		-0.0594215	-0.584361	0.834718	0.522339	0.561626	20.2757	20.2066	19.078	20.3544	20.5238	20.0773	5	5	9.9	120.516	2	0	0	0	1	1	0
P97855	Ras GTPase-activating protein-binding protein 1	G3bp1	Ras GTPase-activating protein-binding protein 1 OS=Mus musculus OX=10090 GN=G3bp1 PE=1 SV=1	9		-0.0677586	0.141	0.881329	0.764868	0.439488	19.7375	19.9894	20.2447	19.8997	19.5783	20.2841	9	8	29.7	119.734	3	0	0	1	1	0	1
P62908	40S ribosomal protein S3	Rps3	40S ribosomal protein S3 OS=Mus musculus OX=10090 GN=Rps3 PE=1 SV=1	11		-0.0735502	-0.178074	0.717604	0.454491	0.188221	22.489	22.5606	22.4307	22.4098	22.4438	22.7529	11	11	52.7	135.087	28	2	4	7	7	2	6
Q52KI8	Serine/arginine repetitive matrix protein 1	Srrm1	Serine/arginine repetitive matrix protein 1 OS=Mus musculus OX=10090 GN=Srrm1 PE=1 SV=2	2		-0.105777	-0.442047	0.771721	0.501758	0.585642	19.4555	19.1948	18.5439	19.4338	19.7049	19.157	2	2	2.6	115.49	1	0	0	0	1	0	0
P60710;P63260	Actin, cytoplasmic 1;Actin, cytoplasmic 1, N-terminally processed;Actin, cytoplasmic 2;Actin, cytoplasmic 2, N-terminally processed	Actb;Actg1	Actin, cytoplasmic 1 OS=Mus musculus OX=10090 GN=Actb PE=1 SV=1;Actin, cytoplasmic 2 OS=Mus musculus OX=10090 GN=Actg1 PE=1 SV=1	15		-0.106383	-0.317446	0.477037	0.247292	0.338313	25.136	25.3356	25.1568	24.8927	25.3573	25.3271	15	6	56	151.205	80	11	12	13	20	12	12
P70698;P70303	CTP synthase 1;CTP synthase 2	Ctps1;Ctps2	CTP synthase 1 OS=Mus musculus OX=10090 GN=Ctps1 PE=1 SV=2;CTP synthase 2 OS=Mus musculus OX=10090 GN=Ctps2 PE=1 SV=1	2		-0.11278	-0.399836	0.0179803	0.129525	0.179273	17.9136	17.9357	17.7231	17.5521	18.048	18.0268	2	2	4.4	107.199	0	0	0	0	0	0	0
P51410	60S ribosomal protein L9	Rpl9	60S ribosomal protein L9 OS=Mus musculus OX=10090 GN=Rpl9 PE=2 SV=2	8		-0.113603	-0.0148211	0.401012	0.947759	0.668025	21.812	21.8651	21.7652	22.1095	21.866	22.0384	8	8	52.6	131.456	23	2	2	4	8	3	4
P68040	Guanine nucleotide-binding protein subunit beta-2-like 1;Guanine nucleotide-binding protein subunit beta-2-like 1, N-terminally processed	Gnb2l1	Receptor of activated protein C kinase 1 OS=Mus musculus OX=10090 GN=Rack1 PE=1 SV=3	7		-0.114742	-0.323781	0.794996	0.286086	0.654672	21.4424	22.1207	21.7498	21.3952	22.0177	21.7749	7	7	24.6	130.501	19	3	4	1	4	2	5
P09405	Nucleolin	Ncl	Nucleolin OS=Mus musculus OX=10090 GN=Ncl PE=1 SV=2	21		-0.118469	0.673373	0.497821	0.0545334	0.0778968	21.7822	21.8308	22.4863	22.7104	21.806	22.044	21	21	28.7	132.66	39	1	5	11	12	5	5
P63038	60 kDa heat shock protein, mitochondrial	Hspd1	60 kDa heat shock protein, mitochondrial OS=Mus musculus OX=10090 GN=Hspd1 PE=1 SV=1	9		-0.119666	-0.633601	0.725506	0.0915093	0.260405	20.3935	20.9128	20.2748	20.0036	20.835	20.7106	9	9	25.5	123.13	12	0	4	2	3	2	1
P16460	Argininosuccinate synthase	Ass1	Argininosuccinate synthase OS=Mus musculus OX=10090 GN=Ass1 PE=1 SV=1	3		-0.120543	-0.206423	0.286792	0.206417	0.45736	19.6646	19.7845	19.7102	19.5671	19.8554	19.8348	3	3	10.7	118.417	0	0	0	0	0	0	0
Q60972	Histone-binding protein RBBP4	Rbbp4	Histone-binding protein RBBP4 OS=Mus musculus OX=10090 GN=Rbbp4 PE=1 SV=5	3		-0.130549	1.67172	0.806704	0.104407	0.0297546	18.5721	19.0365	20.7823	20.4308	18.543	19.3267	3	3	14.8	116.691	4	0	0	1	2	1	0
Q9CY66	H/ACA ribonucleoprotein complex subunit 1	Gar1	H/ACA ribonucleoprotein complex subunit 1 OS=Mus musculus OX=10090 GN=Gar1 PE=1 SV=1	2		-0.134783	-0.760561	0.416951	0.664398	0.715713	18.389	18.5727	16.5481	19.1621	18.7115	18.5198	2	2	7.8	109.903	0	0	0	0	0	0	0
Q61990	Poly(rC)-binding protein 2	Pcbp2	Poly(rC)-binding protein 2 OS=Mus musculus OX=10090 GN=Pcbp2 PE=1 SV=1	8		-0.135262	-0.511093	0.604923	0.203937	0.293798	20.6232	21.0037	20.6241	20.2512	20.9988	20.8987	8	7	39	124.4	14	1	2	3	3	2	3
Q920B9	FACT complex subunit SPT16	Supt16h	FACT complex subunit SPT16 OS=Mus musculus OX=10090 GN=Supt16h PE=1 SV=2	6		-0.136998	2.55493	0.933043	0.22203	0.151892	16.8632	18.671	21.0037	19.9144	16.7878	19.0205	6	6	8.2	112.261	6	0	0	4	2	0	0
O35286	Pre-mRNA-splicing factor ATP-dependent RNA helicase DHX15	Dhx15	Pre-mRNA-splicing factor ATP-dependent RNA helicase DHX15 OS=Mus musculus OX=10090 GN=Dhx15 PE=1 SV=2	11		-0.138985	0.201544	0.649116	0.383188	0.333311	20.2414	20.6634	20.8678	20.7182	20.7394	20.4434	11	11	17.6	123.674	6	0	0	2	3	0	1
Q921M3	Splicing factor 3B subunit 3	Sf3b3	Splicing factor 3B subunit 3 OS=Mus musculus OX=10090 GN=Sf3b3 PE=1 SV=1	3		-0.151502	-0.285746	0.694691	0.121752	0.725773	17.9035	18.4863	18.1356	17.9858	18.3136	18.3793	3	3	3.2	109.204	0	0	0	0	0	0	0
Q61696;P17879	Heat shock 70 kDa protein 1A;Heat shock 70 kDa protein 1B	Hspa1a;Hspa1b	Heat shock 70 kDa protein 1A OS=Mus musculus OX=10090 GN=Hspa1a PE=1 SV=2;Heat shock 70 kDa protein 1B OS=Mus musculus OX=10090 GN=Hspa1b PE=1 SV=3	4		-0.156281	-1.91491	0.894764	0.189257	0.26674	21.4987	19.7759	19.635	18.1224	21.3465	20.2407	8	4	25.6	120.619	8	3	1	1	0	2	1
Q8BKC5	Importin-5	Ipo5	Importin-5 OS=Mus musculus OX=10090 GN=Ipo5 PE=1 SV=3	3		-0.165784	-0.175884	0.345497	0.480882	0.964416	18.3188	18.112	18.372	18.0386	18.4042	18.3581	3	3	4	109.604	0	0	0	0	0	0	0
Q6P4T2	U5 small nuclear ribonucleoprotein 200 kDa helicase	Snrnp200	U5 small nuclear ribonucleoprotein 200 kDa helicase OS=Mus musculus OX=10090 GN=Snrnp200 PE=1 SV=1	23		-0.167871	-0.231739	0.554085	0.448343	0.710483	21.4347	21.2874	21.4216	21.1727	21.7305	21.3273	23	23	15.3	128.374	41	3	5	11	10	6	6
P80316	T-complex protein 1 subunit epsilon	Cct5	T-complex protein 1 subunit epsilon OS=Mus musculus OX=10090 GN=Cct5 PE=1 SV=1	3		-0.176046	-0.119974	0.545369	0.771188	0.897992	19.6289	20.0374	20.2084	19.57	19.9758	20.0426	3	3	10.4	119.463	1	0	0	1	0	0	0
P11440	Cyclin-dependent kinase 1	Cdk1	Cyclin-dependent kinase 1 OS=Mus musculus OX=10090 GN=Cdk1 PE=1 SV=3	4		-0.176228	-0.276154	0.845646	0.160618	0.911214	19.758	18.3352	19.0006	18.8928	19.3184	19.1272	4	4	18.5	114.432	0	0	0	0	0	0	0
Q62189	U1 small nuclear ribonucleoprotein A	Snrpa	U1 small nuclear ribonucleoprotein A OS=Mus musculus OX=10090 GN=Snrpa PE=1 SV=3	5		-0.190092	-0.143952	0.801258	0.522156	0.950682	20.7024	19.5251	20.3171	20.0026	20.2445	20.3631	5	5	28.9	121.155	2	0	0	1	1	0	0
Q9QXX4	Calcium-binding mitochondrial carrier protein Aralar2	Slc25a13	Calcium-binding mitochondrial carrier protein Aralar2 OS=Mus musculus OX=10090 GN=Slc25a13 PE=1 SV=1	2		-0.199117	1.58247	0.93101	0.521916	0.31154	16.739	18.755	19.8199	19.2373	16.2385	19.6537	2	2	3.8	110.443	1	0	0	0	1	0	0
P28656	Nucleosome assembly protein 1-like 1	Nap1l1	Nucleosome assembly protein 1-like 1 OS=Mus musculus OX=10090 GN=Nap1l1 PE=1 SV=2	3		-0.20196	-0.181303	0.566537	0.597898	0.848723	19.7792	19.7726	19.7113	19.8818	20.2272	19.7286	3	3	11.8	119.101	0	0	0	0	0	0	0
Q921F4	Heterogeneous nuclear ribonucleoprotein L-like	Hnrnpll	Heterogeneous nuclear ribonucleoprotein L-like OS=Mus musculus OX=10090 GN=Hnrnpll PE=1 SV=3	8		-0.212986	1.9045	0.791966	0.144832	0.0798403	15.6386	15.9976	18.339	17.5321	16.6549	15.4073	8	8	20.5	99.5696	0	0	0	0	0	0	0
Q9CY58	Plasminogen activator inhibitor 1 RNA-binding protein	Serbp1	Plasminogen activator inhibitor 1 RNA-binding protein OS=Mus musculus OX=10090 GN=Serbp1 PE=1 SV=2	2		-0.215087	0.690727	0.52104	0.206522	0.0356568	21.0204	20.9133	21.867	21.8783	20.9494	21.4144	2	2	6.9	128.043	5	1	0	1	1	1	1
Q3TXU5	Deoxyhypusine synthase	Dhps	Deoxyhypusine synthase OS=Mus musculus OX=10090 GN=Dhps PE=1 SV=2	3		-0.222197	2.5227	0.818968	0.0647869	0.141158	16.2423	17.6701	19.9003	19.5019	16.7549	17.6019	3	3	11.9	107.671	5	0	0	3	2	0	0
Q99PU8	Putative ATP-dependent RNA helicase DHX30	Dhx30	ATP-dependent RNA helicase DHX30 OS=Mus musculus OX=10090 GN=Dhx30 PE=1 SV=1	3		-0.224049	0.793225	0.778146	0.167909	0.34341	17.7549	16.5367	18.1542	18.1719	17.5847	17.1549	3	3	4.2	105.357	0	0	0	0	0	0	0
Q99NB9	Splicing factor 3B subunit 1	Sf3b1	Splicing factor 3B subunit 1 OS=Mus musculus OX=10090 GN=Sf3b1 PE=1 SV=1	12		-0.235907	0.299205	0.776916	0.497935	0.547474	18.1204	19.3701	19.3811	19.1796	18.6773	19.285	12	12	14	114.014	1	0	0	1	0	0	0
Q5SWD9	Pre-rRNA-processing protein TSR1 homolog	Tsr1	Pre-rRNA-processing protein TSR1 homolog OS=Mus musculus OX=10090 GN=Tsr1 PE=1 SV=1	2		-0.239212	0.0578003	0.382505	0.595818	0.319854	17.2512	17.5999	17.6671	17.778	17.7375	17.5921	2	2	3.5	105.626	0	0	0	0	0	0	0
Q8VEE4	Replication protein A 70 kDa DNA-binding subunit;Replication protein A 70 kDa DNA-binding subunit, N-terminally processed	Rpa1	Replication protein A 70 kDa DNA-binding subunit OS=Mus musculus OX=10090 GN=Rpa1 PE=1 SV=1	5		-0.250977	-0.274272	0.258491	0.257717	0.898897	20.2994	20.5187	20.5049	20.2666	20.6471	20.673	5	5	11.4	122.91	7	1	0	2	2	1	1
Q9CWR8	DNA (cytosine-5)-methyltransferase 3-like	Dnmt3l	DNA (cytosine-5)-methyltransferase 3-like OS=Mus musculus OX=10090 GN=Dnmt3l PE=1 SV=1	5		-0.255616	0.172796	0.297078	0.438015	0.0995277	20.0949	19.9103	20.4678	20.3942	20.4037	20.1127	5	5	13.8	121.384	2	0	0	1	1	0	0
Q9CXW4	60S ribosomal protein L11	Rpl11	60S ribosomal protein L11 OS=Mus musculus OX=10090 GN=Rpl11 PE=1 SV=4	6		-0.256036	-0.289563	0.302186	0.262718	0.609091	22.1882	22.2574	22.146	22.2325	22.3404	22.6173	6	6	41	133.782	9	1	1	2	3	0	2
C0HKE6;C0HKE1;C0HKE7;C0HKE2;C0HKE3;C0HKE4;C0HKE5;C0HKE9;C0HKE8;Q8BFU2;Q8CGP7;Q8CGP5;Q8CGP6;Q6GSS7;Q8R1M2;Q64523;P27661	Histone H2A type 3;Histone H2A type 1-K;Histone H2A type 1-F;Histone H2A type 1-H;Histone H2A type 2-A;Histone H2A.J;Histone H2A type 2-C;Histone H2AX	Hist3h2a;Hist1h2ak;Hist1h2af;Hist1h2ah;Hist2h2aa1;H2afj;Hist2h2ac;H2afx	Histone H2A type 1-I OS=Mus musculus OX=10090 GN=H2ac13 PE=1 SV=1;Histone H2A type 1-B OS=Mus musculus OX=10090 GN=H2ac4 PE=1 SV=1;Histone H2A type 1-N OS=Mus musculus OX=10090 GN=Hist1h2an PE=1 SV=1;Histone H2A type 1-C OS=Mus musculus OX=10090 GN=H2ac6 P	3		-0.256037	1.15715	0.589552	0.124429	0.0907845	23.8294	23.6354	24.8749	25.4163	24.3314	23.6455	3	1	26.9	145.733	13	1	2	4	2	2	2
Q9CPS7	RNA-binding protein PNO1	Pno1	RNA-binding protein PNO1 OS=Mus musculus OX=10090 GN=Pno1 PE=1 SV=1	3		-0.257591	2.77628	0.810414	0.101936	0.113917	15.8179	17.2328	19.3001	19.8184	16.1619	17.404	3	3	20.2	105.735	3	0	0	1	2	0	0
Q9JIK5	Nucleolar RNA helicase 2	Ddx21	Nucleolar RNA helicase 2 OS=Mus musculus OX=10090 GN=Ddx21 PE=1 SV=3	20		-0.259369	0.535012	0.384625	0.186726	0.132107	20.633	20.9711	21.5849	21.6079	20.8984	21.2244	20	20	30.1	126.92	15	0	0	6	7	0	2
Q8C4J7	Transducin beta-like protein 3	Tbl3	Transducin beta-like protein 3 OS=Mus musculus OX=10090 GN=Tbl3 PE=2 SV=1	2		-0.263375	2.33437	0.382915	0.292889	0.260239	16.77	17.1327	20.706	18.3922	17.2021	17.2273	2	2	3.7	107.43	1	0	0	1	0	0	0
P10126;P62631	Elongation factor 1-alpha 1;Elongation factor 1-alpha 2	Eef1a1;Eef1a2	Elongation factor 1-alpha 1 OS=Mus musculus OX=10090 GN=Eef1a1 PE=1 SV=3;Elongation factor 1-alpha 2 OS=Mus musculus OX=10090 GN=Eef1a2 PE=1 SV=1	10		-0.268974	-0.755821	0.448042	0.031294	0.260691	23.6479	24.1077	23.4604	23.3215	24.1173	24.1763	10	10	32	142.831	54	7	8	11	10	8	10
Q99JN2	Kelch-like protein 22	Klhl22	Kelch-like protein 22 OS=Mus musculus OX=10090 GN=Klhl22 PE=1 SV=1	6		-0.291037	-0.0851192	0.882509	0.654566	0.916437	21.4481	18.331	20.2281	19.9628	20.2704	20.0908	6	6	11.8	120.331	7	3	0	2	2	0	0
O35658	Complement component 1 Q subcomponent-binding protein, mitochondrial	C1qbp	Complement component 1 Q subcomponent-binding protein, mitochondrial OS=Mus musculus OX=10090 GN=C1qbp PE=1 SV=1	2		-0.294639	3.5704	0.914278	0.282126	0.261832	16.5768	19.9947	22.3359	21.9657	20.2959	16.8648	2	2	9.7	118.034	6	0	0	2	2	1	1
B2RY56	RNA-binding protein 25	Rbm25	RNA-binding protein 25 OS=Mus musculus OX=10090 GN=Rbm25 PE=1 SV=2	2		-0.297733	-0.256258	0.0530159	0.149498	0.640982	18.6097	18.5429	18.5534	18.6821	18.884	18.8641	2	2	3.8	112.136	0	0	0	0	0	0	0
Q9CQN1	Heat shock protein 75 kDa, mitochondrial	Trap1	Heat shock protein 75 kDa, mitochondrial OS=Mus musculus OX=10090 GN=Trap1 PE=1 SV=1	4		-0.298369	-0.195873	0.306455	0.104553	0.633253	19.2518	19.5683	19.5584	19.4667	19.7288	19.688	4	4	7.4	117.262	2	0	0	0	2	0	0
Q01320	DNA topoisomerase 2-alpha	Top2a	DNA topoisomerase 2-alpha OS=Mus musculus OX=10090 GN=Top2a PE=1 SV=2	25		-0.302681	0.593568	0.506884	0.014311	0.210839	21.7732	22.3918	22.9938	22.9637	22.3872	22.3831	25	25	20.7	134.893	56	2	8	12	21	6	7
Q8BU30	Isoleucine--tRNA ligase, cytoplasmic	Iars	Isoleucine--tRNA ligase, cytoplasmic OS=Mus musculus OX=10090 GN=Iars1 PE=1 SV=2	3		-0.307231	-0.497852	0.41412	0.291034	0.302316	18.887	19.0855	18.7842	18.807	19.048	19.5389	3	3	3.3	114.151	1	0	0	0	0	0	1
P62245	40S ribosomal protein S15a	Rps15a	40S ribosomal protein S15a OS=Mus musculus OX=10090 GN=Rps15a PE=1 SV=2	3		-0.307403	0.00097847	0.242919	0.996237	0.199564	21.4252	21.5256	21.6641	21.9036	21.6439	21.9218	3	3	33.1	130.084	14	3	2	2	3	2	2
P61222	ATP-binding cassette sub-family E member 1	Abce1	ATP-binding cassette sub-family E member 1 OS=Mus musculus OX=10090 GN=Abce1 PE=1 SV=1	3		-0.323614	-0.310569	0.459851	0.484998	0.960428	19.2752	19.4721	19.5873	19.1861	19.4035	19.9911	3	3	7	116.915	2	0	0	0	1	0	1
Q587J6	LINE-1 type transposase domain-containing protein 1	L1td1	LINE-1 type transposase domain-containing protein 1 OS=Mus musculus OX=10090 GN=L1td1 PE=2 SV=1	7		-0.324512	0.37565	0.508228	0.00731217	0.282556	19.6369	20.303	20.6646	20.6756	20.2955	20.2934	7	7	11.3	121.869	12	0	2	5	2	1	2
Q9EPU0	Regulator of nonsense transcripts 1	Upf1	Regulator of nonsense transcripts 1 OS=Mus musculus OX=10090 GN=Upf1 PE=1 SV=2	18		-0.325577	0.0343599	0.65497	0.908945	0.622853	18.0906	19.1618	19.0521	18.9202	18.7157	19.188	18	18	20	113.128	0	0	0	0	0	0	0
Q8C854	Myelin expression factor 2	Myef2	Myelin expression factor 2 OS=Mus musculus OX=10090 GN=Myef2 PE=1 SV=1	19		-0.333004	-0.416231	0.657449	0.693649	0.940424	16.6657	17.7816	16.3433	17.9376	17.565	17.5483	19	19	41.6	103.841	0	0	0	0	0	0	0
P11983	T-complex protein 1 subunit alpha	Tcp1	T-complex protein 1 subunit alpha OS=Mus musculus OX=10090 GN=Tcp1 PE=1 SV=3	12		-0.360823	-0.389111	0.153173	0.163119	0.853144	22.1318	21.8909	21.9784	21.9877	22.2698	22.4745	12	12	26.3	132.733	20	2	1	6	5	2	4
Q9DCL9	Multifunctional protein ADE2;Phosphoribosylaminoimidazole-succinocarboxamide synthase;Phosphoribosylaminoimidazole carboxylase	Paics	Multifunctional protein ADE2 OS=Mus musculus OX=10090 GN=Paics PE=1 SV=4	2		-0.363554	-0.386219	0.033392	0.0652705	0.826152	18.3561	18.2646	18.3634	18.212	18.6241	18.7237	2	2	5.2	110.544	0	0	0	0	0	0	0
P52479	Ubiquitin carboxyl-terminal hydrolase 10	Usp10	Ubiquitin carboxyl-terminal hydrolase 10 OS=Mus musculus OX=10090 GN=Usp10 PE=1 SV=3	3		-0.368836	-0.032815	0.354786	0.923024	0.451251	18.8602	19.3542	19.7074	19.1791	19.5764	19.3757	3	3	5.3	116.053	1	0	0	0	1	0	0
Q99JB2	Stomatin-like protein 2, mitochondrial	Stoml2	Stomatin-like protein 2, mitochondrial OS=Mus musculus OX=10090 GN=Stoml2 PE=1 SV=1	2		-0.369266	-0.736879	0.495494	0.420562	0.655253	19.1477	19.7504	19.6812	18.4816	20.1473	19.4893	2	2	8.2	116.697	5	0	2	1	0	1	1
P62827	GTP-binding nuclear protein Ran	Ran	GTP-binding nuclear protein Ran OS=Mus musculus OX=10090 GN=Ran PE=1 SV=3	7		-0.380509	-0.215972	0.21063	0.359715	0.46998	22.5574	22.2523	22.6072	22.5316	22.6427	22.928	7	7	38.4	135.519	23	2	4	5	5	4	3
Q64213	Splicing factor 1	Sf1	Splicing factor 1 OS=Mus musculus OX=10090 GN=Sf1 PE=1 SV=6	7		-0.385914	-0.499772	0.513356	0.454676	0.80379	17.8619	18.0889	17.5077	18.2154	17.9524	18.7702	7	7	15.2	108.396	0	0	0	0	0	0	0
Q99L45	Eukaryotic translation initiation factor 2 subunit 2	Eif2s2	Eukaryotic translation initiation factor 2 subunit 2 OS=Mus musculus OX=10090 GN=Eif2s2 PE=1 SV=1	4		-0.387877	0.243239	0.408319	0.227892	0.250088	19.5432	18.9556	19.773	19.988	19.686	19.5886	4	4	16	117.534	1	0	0	0	1	0	0
P60335	Poly(rC)-binding protein 1	Pcbp1	Poly(rC)-binding protein 1 OS=Mus musculus OX=10090 GN=Pcbp1 PE=1 SV=1	5		-0.392562	-0.258218	0.0318407	0.657695	0.808608	20.8819	20.9606	20.6225	21.4887	21.3322	21.2954	6	5	26.4	126.581	8	0	1	2	3	1	1
Q3U9G9	Lamin-B receptor	Lbr	Delta(14)-sterol reductase LBR OS=Mus musculus OX=10090 GN=Lbr PE=1 SV=2	3		-0.398656	0.0393553	0.439615	0.935801	0.311552	19.5778	19.8236	19.8794	20.398	20.4411	19.7576	3	3	6.1	119.877	3	0	0	1	1	1	0
Q922D8	C-1-tetrahydrofolate synthase, cytoplasmic;Methylenetetrahydrofolate dehydrogenase;Methenyltetrahydrofolate cyclohydrolase;Formyltetrahydrofolate synthetase;C-1-tetrahydrofolate synthase, cytoplasmic, N-terminally processed	Mthfd1	C-1-tetrahydrofolate synthase, cytoplasmic OS=Mus musculus OX=10090 GN=Mthfd1 PE=1 SV=4	2		-0.405317	-3.11495	0.167262	0.0305231	0.0634425	19.4561	19.5121	16.4935	17.0554	19.7699	20.0089	2	2	3	112.296	2	0	1	0	0	0	1
Q60932	Voltage-dependent anion-selective channel protein 1	Vdac1	Voltage-dependent anion-selective channel protein 1 OS=Mus musculus OX=10090 GN=Vdac1 PE=1 SV=3	2		-0.415314	-0.122505	0.755987	0.837758	0.819102	18.1184	20.1235	19.424	19.4035	19.066	20.0065	2	2	8.1	116.142	3	0	0	1	1	0	1
Q9JJI8	60S ribosomal protein L38	Rpl38	60S ribosomal protein L38 OS=Mus musculus OX=10090 GN=Rpl38 PE=1 SV=3	3		-0.420184	0.927811	0.579193	0.174965	0.195326	20.6861	19.5971	21.8152	21.164	20.7048	20.4187	3	3	35.7	124.386	2	0	1	1	0	0	0
P80318	T-complex protein 1 subunit gamma	Cct3	T-complex protein 1 subunit gamma OS=Mus musculus OX=10090 GN=Cct3 PE=1 SV=1	13		-0.420192	-0.649554	0.216477	0.0305106	0.355439	26.4079	26.7071	26.3687	26.2876	26.9875	26.968	13	13	29.2	159.727	30	2	6	6	4	5	7
Q91VR2	ATP synthase subunit gamma, mitochondrial	Atp5c1	ATP synthase subunit gamma, mitochondrial OS=Mus musculus OX=10090 GN=Atp5f1c PE=1 SV=1	4		-0.440367	3.55416	0.940517	0.476955	0.501843	15.8449	23.881	23.7922	23.9227	16.9971	23.6095	4	4	14.4	128.047	7	0	2	1	3	1	0
Q9EQ61	Pescadillo homolog	Pes1	Pescadillo homolog OS=Mus musculus OX=10090 GN=Pes1 PE=1 SV=1	2		-0.44141	0.0983524	0.067337	0.47899	0.0289391	17.8198	17.9535	18.3605	18.4923	18.4184	18.2378	2	2	4.5	109.282	0	0	0	0	0	0	0
Q9DBR1	5-3 exoribonuclease 2	Xrn2	5-3 exoribonuclease 2 OS=Mus musculus OX=10090 GN=Xrn2 PE=1 SV=1	9		-0.449929	-1.1349	0.578204	0.495595	0.660153	18.1627	17.0044	15.7638	18.0333	17.7784	18.2885	9	9	14.5	105.031	0	0	0	0	0	0	0
Q9Z1D1	Eukaryotic translation initiation factor 3 subunit G	Eif3g	Eukaryotic translation initiation factor 3 subunit G OS=Mus musculus OX=10090 GN=Eif3g PE=1 SV=2	4		-0.454915	1.93567	0.912028	0.383372	0.588678	15.4869	21.835	21.3287	20.7743	17.7539	20.4778	4	4	16.9	117.657	5	0	2	1	1	0	1
P84084;P84078;P61205;P61750;Q8BSL7	ADP-ribosylation factor 5;ADP-ribosylation factor 1;ADP-ribosylation factor 3;ADP-ribosylation factor 4;ADP-ribosylation factor 2	Arf5;Arf1;Arf3;Arf4;Arf2	ADP-ribosylation factor 5 OS=Mus musculus OX=10090 GN=Arf5 PE=1 SV=2;ADP-ribosylation factor 1 OS=Mus musculus OX=10090 GN=Arf1 PE=1 SV=2;ADP-ribosylation factor 3 OS=Mus musculus OX=10090 GN=Arf3 PE=2 SV=2;ADP-ribosylation factor 4 OS=Mus musculus OX=1009	2		-0.458565	-0.234373	0.0941077	0.251045	0.215475	19.4691	19.6065	19.8597	19.6644	19.9933	19.9995	2	2	11.7	118.592	1	0	0	0	0	0	1
Q60649	Caseinolytic peptidase B protein homolog	Clpb	Caseinolytic peptidase B protein homolog OS=Mus musculus OX=10090 GN=Clpb PE=1 SV=1	3		-0.460732	0.161971	0.582409	0.838898	0.547285	19.6269	18.4223	20.271	19.0236	19.6157	19.355	3	3	6.8	116.315	3	0	0	3	0	0	0
Q9ESZ8	General transcription factor II-I	Gtf2i	General transcription factor II-I OS=Mus musculus OX=10090 GN=Gtf2i PE=1 SV=3	10		-0.466146	-0.519295	0.144783	0.420592	0.920883	20.5977	20.3635	20.8485	20.0063	20.794	21.0994	10	10	16.2	123.709	11	0	1	5	2	2	1
Q9R0L7	A-kinase anchor protein 8-like	Akap8l	A-kinase anchor protein 8-like OS=Mus musculus OX=10090 GN=Akap8l PE=1 SV=1	2		-0.466283	-0.176698	0.607375	0.684977	0.73883	15.7831	17.0984	16.4799	16.9807	17.1872	16.6269	2	2	4	100.156	0	0	0	0	0	0	0
Q99N89	39S ribosomal protein L43, mitochondrial	Mrpl43	39S ribosomal protein L43, mitochondrial OS=Mus musculus OX=10090 GN=Mrpl43 PE=1 SV=1	5		-0.46664	-0.515885	0.37693	0.331527	0.882987	17.0413	16.5311	16.8579	16.616	17.5724	16.9332	5	5	29	101.552	0	0	0	0	0	0	0
Q9Z0N1;Q9Z0N2	Eukaryotic translation initiation factor 2 subunit 3, X-linked;Eukaryotic translation initiation factor 2 subunit 3, Y-linked	Eif2s3x;Eif2s3y	Eukaryotic translation initiation factor 2 subunit 3, X-linked OS=Mus musculus OX=10090 GN=Eif2s3x PE=1 SV=2;Eukaryotic translation initiation factor 2 subunit 3, Y-linked OS=Mus musculus OX=10090 GN=Eif2s3y PE=1 SV=2	8		-0.475421	-0.26203	0.303652	0.481759	0.2854	20.1173	20.2197	20.4974	20.2665	20.8984	20.3895	8	8	28.8	122.389	6	0	0	2	2	1	1
P68372;Q9D6F9	Tubulin beta-4B chain;Tubulin beta-4A chain	Tubb4b;Tubb4a	Tubulin beta-4B chain OS=Mus musculus OX=10090 GN=Tubb4b PE=1 SV=1;Tubulin beta-4A chain OS=Mus musculus OX=10090 GN=Tubb4a PE=1 SV=3	3		-0.476223	-0.724959	0.268119	0.0838507	0.438388	20.8632	20.436	20.4983	20.3034	21.1192	21.1325	15	2	44.5	124.353	10	1	1	2	2	2	2
Q922B2	Aspartate--tRNA ligase, cytoplasmic	Dars	Aspartate--tRNA ligase, cytoplasmic OS=Mus musculus OX=10090 GN=Dars1 PE=1 SV=2	2		-0.483282	-0.424595	0.10995	0.111426	0.762572	19.9423	20.2042	20.2386	20.0253	20.4445	20.6686	2	2	6.4	121.524	3	0	0	0	2	0	1
Q9QZQ8;Q8CCK0	Core histone macro-H2A.1;Core histone macro-H2A.2	H2afy;H2afy2	Core histone macro-H2A.1 OS=Mus musculus OX=10090 GN=Macroh2a1 PE=1 SV=3;Core histone macro-H2A.2 OS=Mus musculus OX=10090 GN=Macroh2a2 PE=1 SV=3	2		-0.48534	2.5846	0.876591	0.365257	0.376134	15.3521	19.597	20.0521	21.0368	19.7045	16.2152	2	2	9.9	111.958	3	0	0	1	2	0	0
Q00PI9	Heterogeneous nuclear ribonucleoprotein U-like protein 2	Hnrnpul2	Heterogeneous nuclear ribonucleoprotein U-like protein 2 OS=Mus musculus OX=10090 GN=Hnrnpul2 PE=1 SV=2	13		-0.487336	-0.0295038	0.711057	0.978924	0.63134	16.4546	17.8559	17.5588	17.6674	18.5331	16.7521	13	13	23	104.822	0	0	0	0	0	0	0
Q8VIJ6	Splicing factor, proline- and glutamine-rich	Sfpq	Splicing factor, proline- and glutamine-rich OS=Mus musculus OX=10090 GN=Sfpq PE=1 SV=1	15		-0.489065	-0.573542	0.166487	0.0580593	0.725483	21.1719	21.5212	21.1591	21.3651	21.7343	21.937	15	14	27	128.889	18	1	3	2	6	3	3
Q9DAW6	U4/U6 small nuclear ribonucleoprotein Prp4	Prpf4	U4/U6 small nuclear ribonucleoprotein Prp4 OS=Mus musculus OX=10090 GN=Prpf4 PE=1 SV=1	2		-0.489656	-0.0819883	0.109088	0.645027	0.151649	18.4249	18.1568	18.581	18.8161	18.6846	18.8765	2	2	5.4	111.54	1	0	0	0	1	0	0
Q9DBY8	Nuclear valosin-containing protein-like	Nvl	Nuclear valosin-containing protein-like OS=Mus musculus OX=10090 GN=Nvl PE=1 SV=1	8		-0.498273	-0.502625	0.242471	0.349272	0.991679	20.3468	20.212	20.6062	19.9439	20.9971	20.5582	8	8	14.2	122.664	16	2	2	4	2	2	4
P62911	60S ribosomal protein L32	Rpl32	60S ribosomal protein L32 OS=Mus musculus OX=10090 GN=Rpl32 PE=1 SV=2	2		-0.500094	0.2787	0.575302	0.595222	0.417573	17.1187	18.3635	18.3208	18.719	18.6144	17.868	2	2	11.1	109.005	1	0	0	0	1	0	0
Q01853	Transitional endoplasmic reticulum ATPase	Vcp	Transitional endoplasmic reticulum ATPase OS=Mus musculus OX=10090 GN=Vcp PE=1 SV=4	3		-0.52163	-0.650797	0.0452914	0.136395	0.60373	18.7042	18.8752	18.8396	18.4814	19.3801	19.2425	3	3	5	113.523	1	0	0	0	0	0	1
P52480	Pyruvate kinase PKM	Pkm	Pyruvate kinase PKM OS=Mus musculus OX=10090 GN=Pkm PE=1 SV=4	21		-0.530288	-0.828361	0.418824	0.0898503	0.598036	22.0173	22.8377	22.2551	22.0037	22.9767	22.9389	21	21	46	135.029	55	6	9	11	11	8	10
Q99KP6	Pre-mRNA-processing factor 19	Prpf19	Pre-mRNA-processing factor 19 OS=Mus musculus OX=10090 GN=Prpf19 PE=1 SV=1	5		-0.530376	-0.0682602	0.338218	0.892881	0.380093	19.2723	19.3563	20.094	19.4588	20.1607	19.5287	5	5	15.1	117.871	1	0	0	0	0	1	0
P56480	ATP synthase subunit beta, mitochondrial	Atp5b	ATP synthase subunit beta, mitochondrial OS=Mus musculus OX=10090 GN=Atp5f1b PE=1 SV=2	8		-0.536399	-0.349091	0.308635	0.199864	0.656436	19.9774	20.6039	20.5473	20.4087	20.9671	20.6871	8	8	20.8	123.192	15	0	1	3	3	3	5
Q61937	Nucleophosmin	Npm1	Nucleophosmin OS=Mus musculus OX=10090 GN=Npm1 PE=1 SV=1	8		-0.545405	0.843727	0.194648	0.0145448	0.0688443	22.3835	22.7881	24.0404	23.9094	23.0558	23.2066	8	8	33.9	139.384	25	2	2	6	7	4	4
Q8K3F7	L-threonine 3-dehydrogenase, mitochondrial	Tdh	L-threonine 3-dehydrogenase, mitochondrial OS=Mus musculus OX=10090 GN=Tdh PE=1 SV=1	8		-0.563222	-0.339464	0.185566	0.119183	0.400497	21.1898	20.8456	21.3146	21.1683	21.5632	21.5986	8	8	39.1	127.68	21	3	3	3	1	4	7
Q9EQI8	39S ribosomal protein L46, mitochondrial	Mrpl46	39S ribosomal protein L46, mitochondrial OS=Mus musculus OX=10090 GN=Mrpl46 PE=1 SV=1	3		-0.564776	-0.56903	0.305272	0.100331	0.991617	16.2445	16.8667	16.4083	16.6944	17.2056	17.0351	3	3	15.5	100.455	0	0	0	0	0	0	0
Q61753	D-3-phosphoglycerate dehydrogenase	Phgdh	D-3-phosphoglycerate dehydrogenase OS=Mus musculus OX=10090 GN=Phgdh PE=1 SV=3	2		-0.569775	-0.668476	0.0946953	0.0225708	0.547418	17.3303	17.5605	17.3629	17.3304	18.0583	17.972	2	2	4.3	105.614	0	0	0	0	0	0	0
Q9WTM5	RuvB-like 2	Ruvbl2	RuvB-like 2 OS=Mus musculus OX=10090 GN=Ruvbl2 PE=1 SV=3	6		-0.571907	-0.365237	0.0821907	0.347333	0.517366	20.0262	19.8617	20.3732	19.9281	20.5311	20.5007	6	6	17.1	121.221	20	1	3	5	3	2	6
P57784	U2 small nuclear ribonucleoprotein A	Snrpa1	U2 small nuclear ribonucleoprotein A OS=Mus musculus OX=10090 GN=Snrpa1 PE=1 SV=2	3		-0.583164	-0.315151	0.00713505	0.017525	0.0272886	18.1825	18.1166	18.4481	18.3871	18.7561	18.7094	3	3	22	110.6	0	0	0	0	0	0	0
Q8C2Q3	RNA-binding protein 14	Rbm14	RNA-binding protein 14 OS=Mus musculus OX=10090 GN=Rbm14 PE=1 SV=1	15		-0.584155	-0.0438557	0.156889	0.861399	0.158773	16.7748	17.1347	17.4069	17.5832	17.3472	17.7306	15	15	28.8	103.977	0	0	0	0	0	0	0
P62984;P62983;P0CG49;P0CG50	Ubiquitin-60S ribosomal protein L40;Ubiquitin;60S ribosomal protein L40;Ubiquitin-40S ribosomal protein S27a;Ubiquitin;40S ribosomal protein S27a;Polyubiquitin-B;Ubiquitin;Polyubiquitin-C;Ubiquitin;Ubiquitin-related 1;Ubiquitin-related 2	Uba52;Rps27a;Ubb;Ubc	Ubiquitin-60S ribosomal protein L40 OS=Mus musculus OX=10090 GN=Uba52 PE=1 SV=2;Ubiquitin-40S ribosomal protein S27a OS=Mus musculus OX=10090 GN=Rps27a PE=1 SV=2;Polyubiquitin-B OS=Mus musculus OX=10090 GN=Ubb PE=2 SV=1;Polyubiquitin-C OS=Mus musculus OX=1	2		-0.591922	-0.812236	0.0725566	0.0434004	0.0828587	20.324	20.234	20.1085	20.0088	20.7673	20.9746	2	2	19.5	122.417	4	0	0	1	1	0	2
P23249	Putative helicase MOV-10	Mov10	Putative helicase MOV-10 OS=Mus musculus OX=10090 GN=Mov10 PE=1 SV=2	18		-0.594328	-0.14622	0.30129	0.759419	0.263443	21.4987	21.8673	22.3519	21.9102	22.6204	21.9343	18	18	24.7	132.183	36	2	2	10	11	7	4
CON__P02768-1				2	+	-0.594733	-0.0472479	0.605685	0.969589	0.618444	21.2573	20.2024	22.0317	20.523	22.122	20.5272	6	2	8.4	126.664	9	1	1	3	2	1	1
P60122	RuvB-like 1	Ruvbl1	RuvB-like 1 OS=Mus musculus OX=10090 GN=Ruvbl1 PE=1 SV=1	10		-0.626822	-0.233761	0.0540047	0.336237	0.184231	21.2642	21.127	21.7347	21.4426	21.9304	21.7144	10	10	32.5	129.213	10	0	0	2	4	3	1
Q9CY27	Very-long-chain enoyl-CoA reductase	Tecr	Very-long-chain enoyl-CoA reductase OS=Mus musculus OX=10090 GN=Tecr PE=1 SV=1	2		-0.643803	0.81058	0.528576	0.275996	0.27094	17.1519	18.5523	19.1303	19.4827	18.074	18.9178	2	2	6.8	111.309	2	0	0	1	1	0	0
Q7TPV4	Myb-binding protein 1A	Mybbp1a	Myb-binding protein 1A OS=Mus musculus OX=10090 GN=Mybbp1a PE=1 SV=2	24		-0.650229	0.50316	0.383238	0.082525	0.238446	20.1391	21.0537	21.7866	21.713	21.3397	21.1536	24	24	26.4	127.186	43	0	3	12	19	1	8
P99024	Tubulin beta-5 chain	Tubb5	Tubulin beta-5 chain OS=Mus musculus OX=10090 GN=Tubb5 PE=1 SV=1	17		-0.657577	-0.726377	0.0117338	0.0805718	0.647757	24.2083	24.1839	24.2388	24.0158	24.8825	24.8248	17	4	51.8	146.354	61	5	9	13	13	10	11
Q9D0E1	Heterogeneous nuclear ribonucleoprotein M	Hnrnpm	Heterogeneous nuclear ribonucleoprotein M OS=Mus musculus OX=10090 GN=Hnrnpm PE=1 SV=3	29		-0.662271	-0.840563	0.166107	0.0474368	0.536376	25.3218	25.7208	25.457	25.229	26.2382	26.1289	29	29	48	154.096	15	1	2	4	3	2	3
P42932	T-complex protein 1 subunit theta	Cct8	T-complex protein 1 subunit theta OS=Mus musculus OX=10090 GN=Cct8 PE=1 SV=3	14		-0.671899	-0.608761	0.0101134	0.0109367	0.352335	20.5754	20.5003	20.6377	20.5643	21.1884	21.2311	14	14	31.2	124.697	26	1	2	5	6	6	6
Q99K48	Non-POU domain-containing octamer-binding protein	Nono	Non-POU domain-containing octamer-binding protein OS=Mus musculus OX=10090 GN=Nono PE=1 SV=3	11		-0.672838	-1.0654	0.329962	0.410396	0.726127	20.0398	20.887	19.2418	20.8998	20.8974	21.375	12	11	35.3	123.341	3	0	1	0	0	0	2
O09106;P70288	Histone deacetylase 1;Histone deacetylase 2	Hdac1;Hdac2	Histone deacetylase 1 OS=Mus musculus OX=10090 GN=Hdac1 PE=1 SV=1;Histone deacetylase 2 OS=Mus musculus OX=10090 GN=Hdac2 PE=1 SV=1	3		-0.693589	-0.128973	0.244271	0.725212	0.0218197	19.205	19.2051	19.7503	19.789	19.6186	20.1786	3	3	7.7	117.747	5	0	0	2	1	0	2
Q9WVA3	Mitotic checkpoint protein BUB3	Bub3	Mitotic checkpoint protein BUB3 OS=Mus musculus OX=10090 GN=Bub3 PE=1 SV=2	3		-0.694884	-0.264788	0.100704	0.12265	0.117227	18.2135	18.442	18.7009	18.8148	19.0107	19.0346	3	3	13.5	112.217	1	0	0	0	1	0	0
P80314	T-complex protein 1 subunit beta	Cct2	T-complex protein 1 subunit beta OS=Mus musculus OX=10090 GN=Cct2 PE=1 SV=4	3		-0.715048	-1.92762	0.0601622	0.325041	0.466253	19.3979	19.5673	19.3631	17.177	20.0655	20.3298	3	3	9	115.901	3	0	0	0	0	1	2
O35129	Prohibitin-2	Phb2	Prohibitin-2 OS=Mus musculus OX=10090 GN=Phb2 PE=1 SV=1	10		-0.715473	-0.339582	0.0171593	0.269257	0.23126	21.7005	21.8345	22.3087	21.9781	22.434	22.5319	10	10	42.1	132.788	26	1	3	6	8	3	5
Q9JIF0	Protein arginine N-methyltransferase 1	Prmt1	Protein arginine N-methyltransferase 1 OS=Mus musculus OX=10090 GN=Prmt1 PE=1 SV=1	16		-0.7203	1.00421	0.0810893	0.0295308	0.0127807	20.1224	20.1056	21.8823	21.7947	20.9289	20.7397	16	16	41	125.574	11	0	1	4	5	1	0
P58252	Elongation factor 2	Eef2	Elongation factor 2 OS=Mus musculus OX=10090 GN=Eef2 PE=1 SV=2	14		-0.722271	-0.606618	0.17436	0.033377	0.670028	20.4934	20.8993	20.8449	20.7791	21.4159	21.4213	14	13	23.4	125.854	17	0	1	5	4	3	4
Q9ERD7	Tubulin beta-3 chain	Tubb3	Tubulin beta-3 chain OS=Mus musculus OX=10090 GN=Tubb3 PE=1 SV=1	2		-0.723516	-0.654348	0.250489	0.261715	0.846939	19.7295	19.8513	20.1403	19.5787	20.8274	20.2004	11	2	31.6	120.328	4	0	0	1	1	1	1
P68373;P05213;P68368;Q9JJZ2	Tubulin alpha-1C chain;Tubulin alpha-1B chain;Tubulin alpha-4A chain;Tubulin alpha-8 chain	Tuba1c;Tuba1b;Tuba4a;Tuba8	Tubulin alpha-1C chain OS=Mus musculus OX=10090 GN=Tuba1c PE=1 SV=1;Tubulin alpha-1B chain OS=Mus musculus OX=10090 GN=Tuba1b PE=1 SV=2;Tubulin alpha-4A chain OS=Mus musculus OX=10090 GN=Tuba4a PE=1 SV=1;Tubulin alpha-8 chain OS=Mus musculus OX=10090 GN=Tu	13		-0.729683	-0.578839	0.0544717	0.0694402	0.373366	23.7093	23.8404	24.0327	23.8186	24.623	24.386	13	1	41.2	144.41	63	10	10	10	12	10	11
Q9Z2W0	Aspartyl aminopeptidase	Dnpep	Aspartyl aminopeptidase OS=Mus musculus OX=10090 GN=Dnpep PE=1 SV=2	8		-0.73068	-0.0819168	0.404355	0.938245	0.54083	21.3432	21.0605	22.5939	21.1073	22.4874	21.3776	8	8	25.6	129.97	22	1	2	8	4	4	3
Q9EQU5	Protein SET	Set	Protein SET OS=Mus musculus OX=10090 GN=Set PE=1 SV=1	6		-0.735908	2.44683	0.163109	0.186245	0.123583	18.4039	18.8921	22.5927	21.0687	19.4917	19.2761	6	6	33.9	119.725	7	0	0	4	3	0	0
P51881	ADP/ATP translocase 2;ADP/ATP translocase 2, N-terminally processed	Slc25a5	ADP/ATP translocase 2 OS=Mus musculus OX=10090 GN=Slc25a5 PE=1 SV=3	11		-0.737285	-0.356077	0.10305	0.210115	0.00700969	22.7991	22.8163	23.1918	23.186	23.4229	23.6671	11	4	35.2	139.083	34	4	5	7	7	3	8
P23198;P83917	Chromobox protein homolog 3;Chromobox protein homolog 1	Cbx3;Cbx1	Chromobox protein homolog 3 OS=Mus musculus OX=10090 GN=Cbx3 PE=1 SV=2;Chromobox protein homolog 1 OS=Mus musculus OX=10090 GN=Cbx1 PE=1 SV=1	2		-0.737622	0.227792	0.057341	0.156852	0.00901302	19.6518	19.5173	20.4923	20.6077	20.3255	20.3188	2	2	16.4	120.913	2	0	0	1	1	0	0
Q8VDP4	Cell cycle and apoptosis regulator protein 2	Ccar2	Cell cycle and apoptosis regulator protein 2 OS=Mus musculus OX=10090 GN=Ccar2 PE=1 SV=2	5		-0.756284	-0.535677	0.0637106	0.244374	0.547835	18.9108	18.6108	19.2354	18.7274	19.6404	19.3938	5	5	7	114.519	0	0	0	0	0	0	0
O08810	116 kDa U5 small nuclear ribonucleoprotein component	Eftud2	116 kDa U5 small nuclear ribonucleoprotein component OS=Mus musculus OX=10090 GN=Eftud2 PE=1 SV=1	10		-0.757794	0.0216818	0.206176	0.945909	0.193688	19.3081	18.6824	20.0047	19.5448	19.9108	19.5953	11	10	15.9	117.046	3	0	0	1	1	1	0
Q03265	ATP synthase subunit alpha, mitochondrial	Atp5a1	ATP synthase subunit alpha, mitochondrial OS=Mus musculus OX=10090 GN=Atp5f1a PE=1 SV=1	17		-0.762766	-0.462236	0.0237502	0.0831357	0.179518	22.8198	22.8371	23.2176	23.0404	23.5539	23.6286	17	17	43.8	139.097	63	6	8	12	12	11	14
P67778	Prohibitin	Phb	Prohibitin OS=Mus musculus OX=10090 GN=Phb PE=1 SV=1	6		-0.784073	-0.358356	0.047592	0.253006	0.184954	20.939	20.7209	21.4216	21.0897	21.6682	21.5599	6	6	27.2	127.399	14	1	1	3	4	2	3
P17182	Alpha-enolase	Eno1	Alpha-enolase OS=Mus musculus OX=10090 GN=Eno1 PE=1 SV=3	15		-0.792819	-0.635962	0.0231905	0.0467732	0.354533	22.7947	22.9059	23.1132	22.9011	23.7269	23.5593	15	15	49.1	139.001	55	4	5	10	13	12	11
Q923G2	DNA-directed RNA polymerases I, II, and III subunit RPABC3	Polr2h	DNA-directed RNA polymerases I, II, and III subunit RPABC3 OS=Mus musculus OX=10090 GN=Polr2h PE=1 SV=3	2		-0.792855	-0.184413	0.0447971	0.455165	0.108207	18.7766	19.0249	19.675	19.3434	19.6108	19.7764	2	2	19.3	116.207	3	0	0	1	0	1	1
Q9D0D4	Probable dimethyladenosine transferase	Dimt1	Probable dimethyladenosine transferase OS=Mus musculus OX=10090 GN=Dimt1 PE=2 SV=1	5		-0.79797	0.141143	0.100127	0.456406	0.0276873	17.2971	17.304	18.1973	18.282	17.9717	18.2253	5	5	18.2	107.277	0	0	0	0	0	0	0
Q64737	Trifunctional purine biosynthetic protein adenosine-3;Phosphoribosylamine--glycine ligase;Phosphoribosylformylglycinamidine cyclo-ligase;Phosphoribosylglycinamide formyltransferase	Gart	Trifunctional purine biosynthetic protein adenosine-3 OS=Mus musculus OX=10090 GN=Gart PE=1 SV=3	5		-0.799151	-0.259827	0.280188	0.55015	0.426104	19.1835	18.3278	19.2636	19.3263	19.2497	19.8598	5	5	7.6	115.211	4	0	0	0	1	1	2
P47915	60S ribosomal protein L29	Rpl29	60S ribosomal protein L29 OS=Mus musculus OX=10090 GN=Rpl29 PE=1 SV=2	2		-0.80112	0.127801	0.241789	0.879608	0.373605	20.9449	21.6888	21.5829	22.9086	21.9527	22.2832	2	2	13.8	131.361	4	0	0	1	1	1	1
Q91ZW3	SWI/SNF-related matrix-associated actin-dependent regulator of chromatin subfamily A member 5	Smarca5	SWI/SNF-related matrix-associated actin-dependent regulator of chromatin subfamily A member 5 OS=Mus musculus OX=10090 GN=Smarca5 PE=1 SV=1	7		-0.801362	0.275884	0.0880803	0.0378213	0.0549714	18.815	19.07	19.9799	20.0596	19.7159	19.7718	7	7	6.5	117.412	2	0	0	1	1	0	0
P17742	Peptidyl-prolyl cis-trans isomerase A;Peptidyl-prolyl cis-trans isomerase A, N-terminally processed	Ppia	Peptidyl-prolyl cis-trans isomerase A OS=Mus musculus OX=10090 GN=Ppia PE=1 SV=2	6		-0.804704	-0.00928974	0.0526316	0.943599	0.0345057	21.0423	21.1763	22.0093	21.8001	21.9164	21.9116	6	6	32.9	129.856	10	1	1	2	3	1	2
Q9EPL8	Importin-7	Ipo7	Importin-7 OS=Mus musculus OX=10090 GN=Ipo7 PE=1 SV=2	2		-0.805914	1.12802	0.139001	0.0811518	0.014931	16.0812	16.3979	18.348	17.9989	17.3007	16.7902	2	2	2.6	102.917	0	0	0	0	0	0	0
Q9DCU6	39S ribosomal protein L4, mitochondrial	Mrpl4	39S ribosomal protein L4, mitochondrial OS=Mus musculus OX=10090 GN=Mrpl4 PE=1 SV=1	7		-0.806375	-0.232987	0.308703	0.593861	0.439129	15.419	16.3658	16.4844	16.4471	16.3843	17.0132	7	7	30.6	98.1139	0	0	0	0	0	0	0
Q8BX22	Sal-like protein 4	Sall4	Sal-like protein 4 OS=Mus musculus OX=10090 GN=Sall4 PE=1 SV=2	5		-0.818814	0.0675764	0.158193	0.865514	0.17672	18.424	18.324	18.9925	19.5282	18.966	19.4195	5	5	7.6	113.654	2	0	0	0	1	0	1
A2A432	Cullin-4B	Cul4b	Cullin-4B OS=Mus musculus OX=10090 GN=Cul4b PE=1 SV=1	4		-0.818981	-0.642758	0.195102	0.48421	0.832185	19.5665	18.9145	20.0407	18.7927	19.886	20.2329	4	4	4.7	117.433	2	0	0	1	0	0	1
P16858	Glyceraldehyde-3-phosphate dehydrogenase	Gapdh	Glyceraldehyde-3-phosphate dehydrogenase OS=Mus musculus OX=10090 GN=Gapdh PE=1 SV=2	12		-0.837563	-0.422459	0.0752746	0.122296	0.216004	23.8156	24.1769	24.5144	24.3083	24.9564	24.7112	12	12	43.2	146.483	37	1	4	8	8	9	7
Q08943	FACT complex subunit SSRP1	Ssrp1	FACT complex subunit SSRP1 OS=Mus musculus OX=10090 GN=Ssrp1 PE=1 SV=2	6		-0.844589	1.24692	0.3039	0.214927	0.00131465	18.5671	18.4737	20.5784	20.6454	18.9235	19.8065	6	6	10.3	116.995	6	0	0	2	3	0	1
Q9R190;Q924K8;Q8K4B0	Metastasis-associated protein MTA2;Metastasis-associated protein MTA3;Metastasis-associated protein MTA1	Mta2;Mta3;Mta1	Metastasis-associated protein MTA2 OS=Mus musculus OX=10090 GN=Mta2 PE=1 SV=1;Metastasis-associated protein MTA3 OS=Mus musculus OX=10090 GN=Mta3 PE=1 SV=1;Metastasis-associated protein MTA1 OS=Mus musculus OX=10090 GN=Mta1 PE=1 SV=1	2		-0.845995	-0.453224	0.351544	0.310722	0.589346	17.4627	18.5063	18.1352	18.6194	18.8501	18.811	2	2	3	110.385	0	0	0	0	0	0	0
P80315	T-complex protein 1 subunit delta	Cct4	T-complex protein 1 subunit delta OS=Mus musculus OX=10090 GN=Cct4 PE=1 SV=3	4		-0.846412	-1.10737	0.0601784	0.00117686	0.221799	20.7597	20.9618	20.5772	20.6224	21.6803	21.734	4	4	10.4	126.335	13	0	3	1	3	4	2
Q9JMD0	BUB3-interacting and GLEBS motif-containing protein ZNF207	Znf207	BUB3-interacting and GLEBS motif-containing protein ZNF207 OS=Mus musculus OX=10090 GN=Znf207 PE=1 SV=1	2		-0.84898	-0.319047	0.205928	0.0683201	0.308975	18.82	18.2487	19.1092	19.0194	19.397	19.3697	2	2	5.1	113.964	5	0	0	1	1	1	2
Q91YQ5	Dolichyl-diphosphooligosaccharide--protein glycosyltransferase subunit 1	Rpn1	Dolichyl-diphosphooligosaccharide--protein glycosyltransferase subunit 1 OS=Mus musculus OX=10090 GN=Rpn1 PE=1 SV=1	3		-0.85598	-0.328664	0.167605	0.67414	0.526451	18.4112	18.577	19.5974	18.4454	19.6169	19.0833	3	3	6.7	113.731	8	0	1	3	1	3	0
Q922Q4	Pyrroline-5-carboxylate reductase 2	Pycr2	Pyrroline-5-carboxylate reductase 2 OS=Mus musculus OX=10090 GN=Pycr2 PE=1 SV=1	3		-0.863893	0.23675	0.24144	0.634053	0.0448937	19.3704	19.2033	20.3983	20.3767	19.7852	20.5162	3	3	14.4	119.65	3	0	0	1	1	0	1
P97311	DNA replication licensing factor MCM6	Mcm6	DNA replication licensing factor MCM6 OS=Mus musculus OX=10090 GN=Mcm6 PE=1 SV=1	9		-0.869217	-0.121822	0.0355039	0.391652	0.0777678	19.5547	19.8009	20.3834	20.467	20.4555	20.6386	9	9	13.9	121.3	8	0	0	1	3	1	3
E9Q5C9		Nolc1	Nucleolar and coiled-body phosphoprotein 1 OS=Mus musculus OX=10090 GN=Nolc1 PE=1 SV=1	2		-0.876966	0.547888	0.241023	0.19842	0.141088	17.7348	16.9046	18.9202	18.5689	18.4178	17.9755	2	2	3.6	108.522	0	0	0	0	0	0	0
P97310	DNA replication licensing factor MCM2	Mcm2	DNA replication licensing factor MCM2 OS=Mus musculus OX=10090 GN=Mcm2 PE=1 SV=3	6		-0.880961	0.111667	0.154994	0.778494	0.0565225	18.8532	19.1272	20.1663	19.7994	19.5849	20.1575	6	6	8	117.689	5	0	0	2	1	0	2
P50247	Adenosylhomocysteinase	Ahcy	Adenosylhomocysteinase OS=Mus musculus OX=10090 GN=Ahcy PE=1 SV=3	4		-0.881536	-0.860413	0.419702	0.423457	0.929671	18.6704	18.4368	18.7474	18.402	18.7425	20.1277	4	4	11.8	113.127	1	0	0	0	0	0	1
Q6ZWU9	40S ribosomal protein S27	Rps27	40S ribosomal protein S27 OS=Mus musculus OX=10090 GN=Rps27 PE=1 SV=3	2		-0.896483	-1.40282	0.705563	0.646434	0.877718	17.5847	21.181	21.1373	16.6157	20.2163	20.3423	2	2	14.3	117.077	3	0	1	1	1	0	0
Q08288	Cell growth-regulating nucleolar protein	Lyar	Cell growth-regulating nucleolar protein OS=Mus musculus OX=10090 GN=Lyar PE=1 SV=2	2		-0.908871	0.733982	0.494198	0.0945397	0.31063	16.4136	18.2012	18.7988	19.1017	18.2764	18.1562	2	2	9.3	108.948	1	0	0	0	1	0	0
P62821	Ras-related protein Rab-1A	Rab1A	Ras-related protein Rab-1A OS=Mus musculus OX=10090 GN=Rab1A PE=1 SV=3	4		-0.912855	-0.601692	0.0934694	0.0204506	0.280398	20.4949	20.7888	20.9471	20.9589	21.5803	21.5291	4	4	29.3	126.299	11	1	1	2	3	2	2
P30681	High mobility group protein B2	Hmgb2	High mobility group protein B2 OS=Mus musculus OX=10090 GN=Hmgb2 PE=1 SV=3	2		-0.923879	0.566415	0.0845906	0.203165	0.0357467	18.8461	18.4838	20.3698	19.9408	19.3739	19.8038	2	2	13.8	116.818	1	0	0	0	0	0	1
P38647	Stress-70 protein, mitochondrial	Hspa9	Stress-70 protein, mitochondrial OS=Mus musculus OX=10090 GN=Hspa9 PE=1 SV=3	19		-0.947241	-0.548839	0.181969	0.27691	0.454092	23.3991	22.6838	23.5963	23.2835	24.2819	23.6955	19	19	36.1	140.94	72	8	11	12	11	13	17
Q9CW46	Ribonucleoprotein PTB-binding 1	Raver1	Ribonucleoprotein PTB-binding 1 OS=Mus musculus OX=10090 GN=Raver1 PE=1 SV=2	2		-0.956478	-0.495234	0.189232	0.0175497	0.367202	16.3755	16.9849	17.0949	17.188	17.5893	17.6841	2	2	4.3	102.917	0	0	0	0	0	0	0
P63017	Heat shock cognate 71 kDa protein	Hspa8	Heat shock cognate 71 kDa protein OS=Mus musculus OX=10090 GN=Hspa8 PE=1 SV=1	22		-0.97822	-0.0845404	0.00371795	0.673429	0.0863946	22.4696	22.3849	23.471	23.1708	23.4477	23.3632	22	17	40.4	138.307	84	8	7	17	20	17	15
P11499	Heat shock protein HSP 90-beta	Hsp90ab1	Heat shock protein HSP 90-beta OS=Mus musculus OX=10090 GN=Hsp90ab1 PE=1 SV=3	16		-0.979329	-1.23719	0.312655	0.0117742	0.713995	21.3121	22.3814	21.4901	21.6876	22.7437	22.9084	26	16	43.6	132.523	30	1	3	5	6	6	9
P63242;Q8BGY2	Eukaryotic translation initiation factor 5A-1;Eukaryotic translation initiation factor 5A-2	Eif5a;Eif5a2	Eukaryotic translation initiation factor 5A-1 OS=Mus musculus OX=10090 GN=Eif5a PE=1 SV=2;Eukaryotic translation initiation factor 5A-2 OS=Mus musculus OX=10090 GN=Eif5a2 PE=1 SV=3	2		-1.03888	0.301147	0.0183485	0.241385	0.0227868	21.088	21.2553	22.6462	22.3771	22.1637	22.2573	2	2	22.7	131.788	11	1	1	1	3	2	3
Q9CZU3	Superkiller viralicidic activity 2-like 2	Skiv2l2	Exosome RNA helicase MTR4 OS=Mus musculus OX=10090 GN=Mtrex PE=1 SV=1	4		-1.04099	-0.910861	0.242644	0.312884	0.696517	18.3008	18.8046	18.7401	18.6256	19.1002	20.0872	4	4	5	113.659	1	0	0	0	0	0	1
P48962	ADP/ATP translocase 1	Slc25a4	ADP/ATP translocase 1 OS=Mus musculus OX=10090 GN=Slc25a4 PE=1 SV=4	3		-1.05519	-0.868289	0.0536735	0.0397917	0.290666	20.1167	19.9102	20.2739	20.1268	21.0891	21.0481	10	3	31.9	122.565	7	1	1	1	2	1	1
Q60848	Lymphocyte-specific helicase	Hells	Lymphocyte-specific helicase OS=Mus musculus OX=10090 GN=Hells PE=1 SV=2	5		-1.05525	-0.371536	0.0838703	0.355364	0.110303	18.4968	18.8234	19.4125	19.2751	19.4724	19.9583	5	5	7.3	115.438	4	0	0	1	1	0	2
P80317	T-complex protein 1 subunit zeta	Cct6a	T-complex protein 1 subunit zeta OS=Mus musculus OX=10090 GN=Cct6a PE=1 SV=3	12		-1.10541	-0.795936	0.0251988	0.21328	0.462648	20.6141	20.7702	21.2833	20.72	21.8269	21.7682	12	12	32.4	126.983	13	0	0	2	3	4	4
P20029	78 kDa glucose-regulated protein	Hspa5	Endoplasmic reticulum chaperone BiP OS=Mus musculus OX=10090 GN=Hspa5 PE=1 SV=3	11		-1.12595	-0.688145	0.0182503	0.151705	0.266845	20.2333	20.0303	20.7926	20.3466	21.3706	21.1448	13	11	25.3	123.918	28	0	1	7	7	4	9
P49717	DNA replication licensing factor MCM4	Mcm4	DNA replication licensing factor MCM4 OS=Mus musculus OX=10090 GN=Mcm4 PE=1 SV=1	10		-1.14619	-0.130103	0.235683	0.782896	0.304597	18.4967	19.5685	20.121	19.9763	19.8131	20.5444	10	10	14	118.52	8	0	0	3	4	0	1
Q61881	DNA replication licensing factor MCM7	Mcm7	DNA replication licensing factor MCM7 OS=Mus musculus OX=10090 GN=Mcm7 PE=1 SV=1	14		-1.14802	-0.267305	0.0201213	0.209798	0.0833759	19.8709	20.1115	20.859	20.8848	21.0452	21.2332	14	14	29.5	124.005	14	0	1	1	4	3	5
Q9ER88	28S ribosomal protein S29, mitochondrial	Dap3	28S ribosomal protein S29, mitochondrial OS=Mus musculus OX=10090 GN=Dap3 PE=1 SV=1	7		-1.22207	-0.870079	0.0128118	0.248387	0.52107	15.7513	15.5476	15.6199	16.3829	16.7787	16.9644	7	7	24.6	97.0448	0	0	0	0	0	0	0
Q91V92	ATP-citrate synthase	Acly	ATP-citrate synthase OS=Mus musculus OX=10090 GN=Acly PE=1 SV=1	2		-1.26353	-1.27436	0.360362	0.0260234	0.991415	18.9748	20.5807	19.8256	19.7082	21.0501	21.0324	2	2	2.7	121.172	9	0	2	1	2	2	2
P49718	DNA replication licensing factor MCM5	Mcm5	DNA replication licensing factor MCM5 OS=Mus musculus OX=10090 GN=Mcm5 PE=1 SV=2	17		-1.26785	-0.298699	0.00308457	0.100579	0.0117829	23.4114	23.4918	24.4857	24.3558	24.7454	24.6935	17	17	33.7	145.184	36	1	1	8	11	6	9
Q9WUA3;P12382	ATP-dependent 6-phosphofructokinase, platelet type;ATP-dependent 6-phosphofructokinase, liver type	Pfkp;Pfkl	ATP-dependent 6-phosphofructokinase, platelet type OS=Mus musculus OX=10090 GN=Pfkp PE=1 SV=1;ATP-dependent 6-phosphofructokinase, liver type OS=Mus musculus OX=10090 GN=Pfkl PE=1 SV=4	2		-1.31288	-0.733648	0.0683278	0.152188	0.0353731	17.6785	17.7894	18.3352	18.2912	18.8628	19.2309	2	2	4.6	110.188	5	0	0	1	2	0	2
P35922	Fragile X mental retardation protein 1 homolog	Fmr1	Synaptic functional regulator FMR1 OS=Mus musculus OX=10090 GN=Fmr1 PE=1 SV=1	2		-1.32871	-0.032999	0.459653	0.860619	0.465654	15.8086	18.1489	18.1262	18.4228	18.3153	18.2997	3	1	6.8	107.121	0	0	0	0	0	0	0
Q6ZQ38	Cullin-associated NEDD8-dissociated protein 1	Cand1	Cullin-associated NEDD8-dissociated protein 1 OS=Mus musculus OX=10090 GN=Cand1 PE=1 SV=2	2		-1.33188	-0.171543	0.18109	0.746264	0.0113646	16.8089	16.9388	18.1216	17.9468	18.6123	17.7992	2	2	2.4	106.228	0	0	0	0	0	0	0
Q61316	Heat shock 70 kDa protein 4	Hspa4	Heat shock 70 kDa protein 4 OS=Mus musculus OX=10090 GN=Hspa4 PE=1 SV=1	2		-1.33844	0.425796	0.335455	0.443275	0.227538	16.6673	18.2271	19.5688	18.8541	18.8191	18.7523	2	2	3.3	110.889	2	0	0	1	1	0	0
P19157	Glutathione S-transferase P 1	Gstp1	Glutathione S-transferase P 1 OS=Mus musculus OX=10090 GN=Gstp1 PE=1 SV=2	6		-1.34671	-0.790646	0.198449	0.367957	0.220939	20.9159	20.4435	21.1365	21.3351	22.5537	21.4991	6	3	41.4	127.884	18	2	1	2	4	5	4
P14733	Lamin-B1	Lmnb1	Lamin-B1 OS=Mus musculus OX=10090 GN=Lmnb1 PE=1 SV=3	4		-1.35264	-0.564124	0.0214007	0.13579	0.121481	19.349	19.2698	19.9266	20.2692	20.5687	20.7554	4	4	8.2	120.139	6	0	0	1	1	2	2
Q6A4J8	Ubiquitin carboxyl-terminal hydrolase 7	Usp7	Ubiquitin carboxyl-terminal hydrolase 7 OS=Mus musculus OX=10090 GN=Usp7 PE=1 SV=1	6		-1.36468	0.276674	0.016927	0.499092	0.0726441	19.5504	19.3188	21.3564	20.7954	20.7261	20.8724	6	6	8.6	122.619	5	0	0	1	2	1	1
P35700	Peroxiredoxin-1	Prdx1	Peroxiredoxin-1 OS=Mus musculus OX=10090 GN=Prdx1 PE=1 SV=1	5		-1.3661	-0.900764	0.178641	0.00169302	0.448596	20.5108	21.3027	21.3571	21.3871	22.2947	22.251	5	5	24.1	129.103	7	1	1	1	2	1	1
P56546	C-terminal-binding protein 2	Ctbp2	C-terminal-binding protein 2 OS=Mus musculus OX=10090 GN=Ctbp2 PE=1 SV=2	5		-1.36777	-0.38318	0.0102829	0.342107	0.137527	19.6848	19.5591	20.8519	20.3612	20.8976	21.0818	5	5	14.8	122.436	5	0	0	1	1	1	2
P07901	Heat shock protein HSP 90-alpha	Hsp90aa1	Heat shock protein HSP 90-alpha OS=Mus musculus OX=10090 GN=Hsp90aa1 PE=1 SV=4	26		-1.38476	-1.28576	0.177142	0.0225914	0.848782	22.4654	23.2832	22.9622	22.9844	24.2029	24.3152	26	16	39.4	140.213	75	5	10	14	13	14	19
P25206	DNA replication licensing factor MCM3	Mcm3	DNA replication licensing factor MCM3 OS=Mus musculus OX=10090 GN=Mcm3 PE=1 SV=2	10		-1.39514	-0.638309	0.102948	0.173791	0.144193	19.3737	19.8669	20.571	20.1833	20.9723	21.0585	10	10	16	122.026	8	0	0	1	1	2	4
P18760	Cofilin-1	Cfl1	Cofilin-1 OS=Mus musculus OX=10090 GN=Cfl1 PE=1 SV=3	4		-1.43665	-0.988385	0.00754853	0.0693992	0.173326	20.1887	20.0128	20.712	20.386	21.6047	21.4701	4	4	32.5	124.374	5	0	1	1	1	0	2
Q8BK67	Protein RCC2	Rcc2	Protein RCC2 OS=Mus musculus OX=10090 GN=Rcc2 PE=1 SV=1	6		-1.45734	0.0257854	0.237482	0.836999	0.240157	19.2246	20.4048	21.2649	21.3308	21.3692	21.1749	6	6	18.5	124.769	13	0	1	4	5	1	2
Q8K363	ATP-dependent RNA helicase DDX18	Ddx18	ATP-dependent RNA helicase DDX18 OS=Mus musculus OX=10090 GN=Ddx18 PE=1 SV=1	4		-1.48705	1.07212	0.5378	0.63748	0.0239779	16.8128	16.5598	19.4816	19.0093	16.496	19.8507	4	4	7.9	108.21	2	0	0	1	0	0	1
Q6PDQ2	Chromodomain-helicase-DNA-binding protein 4	Chd4	Chromodomain-helicase-DNA-binding protein 4 OS=Mus musculus OX=10090 GN=Chd4 PE=1 SV=1	7		-1.49157	0.938592	0.0467047	0.196407	0.0459026	18.2382	17.7498	20.0438	20.8045	19.2608	19.7103	7	7	6.8	115.807	12	0	0	2	7	0	3
Q80U70	Polycomb protein Suz12	Suz12	Polycomb protein Suz12 OS=Mus musculus OX=10090 GN=Suz12 PE=1 SV=2	2		-1.49442	0.182272	0.120516	0.660096	0.0221556	17.6666	17.7713	19.2746	19.5166	18.9067	19.5201	2	2	2.7	112.656	3	0	0	1	2	0	0
Q9D8N0	Elongation factor 1-gamma	Eef1g	Elongation factor 1-gamma OS=Mus musculus OX=10090 GN=Eef1g PE=1 SV=3	4		-1.50768	-1.3633	0.643807	0.284805	0.961954	15.8387	20.6647	18.3981	18.394	20.4135	19.1052	4	4	11.4	112.814	4	0	3	0	0	1	0
Q8BVY0	Ribosomal L1 domain-containing protein 1	Rsl1d1	Ribosomal L1 domain-containing protein 1 OS=Mus musculus OX=10090 GN=Rsl1d1 PE=1 SV=1	4		-1.51566	0.56929	0.530348	0.396868	0.427899	16.6419	20.0162	20.0859	20.7421	19.4337	20.2557	4	4	15.7	117.175	5	0	1	1	2	0	1
P11103	Poly [ADP-ribose] polymerase 1	Parp1	Poly [ADP-ribose] polymerase 1 OS=Mus musculus OX=10090 GN=Parp1 PE=1 SV=3	15		-1.52035	0.524393	0.219333	0.0495656	0.16679	19.0556	20.186	21.7376	21.5936	21.2316	21.0508	15	15	21.4	124.855	21	0	1	5	10	3	2
P97822	Acidic leucine-rich nuclear phosphoprotein 32 family member E	Anp32e	Acidic leucine-rich nuclear phosphoprotein 32 family member E OS=Mus musculus OX=10090 GN=Anp32e PE=1 SV=2	4		-1.55698	2.93121	0.0251159	0.00266187	0.00935845	18.2056	17.8876	22.5993	22.4702	19.5104	19.6967	4	4	19.2	120.37	7	0	0	3	4	0	0
P84244;P84228;P68433;P02301	Histone H3.3;Histone H3.2;Histone H3.1;Histone H3.3C	H3f3a;Hist1h3b;Hist1h3a;H3f3c	Histone H3.3 OS=Mus musculus OX=10090 GN=H3-3a PE=1 SV=2;Histone H3.2 OS=Mus musculus OX=10090 GN=H3c2 PE=1 SV=2;Histone H3.1 OS=Mus musculus OX=10090 GN=H3c1 PE=1 SV=2;Histone H3.3C OS=Mus musculus OX=10090 GN=H3-5 PE=3 SV=3	2		-1.62003	1.57806	0.494384	0.317213	0.256233	24.1506	20.9492	24.8515	26.6444	23.9569	24.383	2	2	10.3	144.936	1	0	0	0	1	0	0
Q8CAQ8	MICOS complex subunit Mic60	Immt	MICOS complex subunit Mic60 OS=Mus musculus OX=10090 GN=Immt PE=1 SV=1	2		-1.65743	-0.692965	0.0195901	0.516681	0.408809	18.2767	18.0339	19.8514	18.3881	19.8714	19.7541	2	2	3.7	114.176	4	0	0	2	0	1	1
O08756	3-hydroxyacyl-CoA dehydrogenase type-2	Hsd17b10	3-hydroxyacyl-CoA dehydrogenase type-2 OS=Mus musculus OX=10090 GN=Hsd17b10 PE=1 SV=4	2		-1.67817	-0.547559	0.303343	0.163912	0.411778	16.2686	18.002	18.4155	18.1164	18.8343	18.7927	2	2	12.3	108.429	0	0	0	0	0	0	0
Q61687	Transcriptional regulator ATRX	Atrx	Transcriptional regulator ATRX OS=Mus musculus OX=10090 GN=Atrx PE=1 SV=3	5		-1.70292	1.82213	0.0333704	0.00883801	0.0148137	16.9851	16.5662	20.2008	20.4005	18.6026	18.3545	5	5	2.9	111.11	5	0	0	2	3	0	0
P63158	High mobility group protein B1	Hmgb1	High mobility group protein B1 OS=Mus musculus OX=10090 GN=Hmgb1 PE=1 SV=2	2		-1.71383	0.682015	0.252405	0.100587	0.175605	17.2018	18.6436	20.4557	20.1814	19.681	19.5921	2	2	13.5	115.756	1	0	0	1	0	0	0
Q99LC2	Cleavage stimulation factor subunit 1	Cstf1	Cleavage stimulation factor subunit 1 OS=Mus musculus OX=10090 GN=Cstf1 PE=1 SV=1	2		-1.71908	-0.751983	0.378053	0.305639	0.563124	15.7461	18.1332	18.3468	17.4667	18.9243	18.3932	2	2	7.7	107.01	0	0	0	0	0	0	0
Q9R1T2	SUMO-activating enzyme subunit 1;SUMO-activating enzyme subunit 1, N-terminally processed	Sae1	SUMO-activating enzyme subunit 1 OS=Mus musculus OX=10090 GN=Sae1 PE=1 SV=1	2		-1.73715	-0.0234671	0.398926	0.662538	0.402869	15.5931	18.1084	18.5244	18.6045	18.5926	18.5832	2	2	11.4	108.006	0	0	0	0	0	0	0
P62962;CON__P02584	Profilin-1	Pfn1	Profilin-1 OS=Mus musculus OX=10090 GN=Pfn1 PE=1 SV=2;	4	+	-1.7391	-0.491518	0.533892	0.0456218	0.635417	16.0807	19.9512	19.1852	19.3419	19.8083	19.7018	4	4	40	114.069	0	0	0	0	0	0	0
Q9ERG0	LIM domain and actin-binding protein 1	Lima1	LIM domain and actin-binding protein 1 OS=Mus musculus OX=10090 GN=Lima1 PE=1 SV=3	2		-1.76217	-1.92175	0.0473349	0.014007	0.628775	18.224	17.7652	17.6817	17.9883	19.8602	19.6533	2	2	3.3	111.173	2	0	0	0	0	1	1
Q91VI7	Ribonuclease inhibitor	Rnh1	Ribonuclease inhibitor OS=Mus musculus OX=10090 GN=Rnh1 PE=1 SV=1	2		-1.76224	1.46098	0.319987	0.383954	0.0329645	16.7278	15.8405	19.888	19.1267	16.9852	19.1075	2	2	6.6	107.676	3	0	0	2	1	0	0
Q8R429;O55143	Sarcoplasmic/endoplasmic reticulum calcium ATPase 1;Sarcoplasmic/endoplasmic reticulum calcium ATPase 2	Atp2a1;Atp2a2	Sarcoplasmic/endoplasmic reticulum calcium ATPase 1 OS=Mus musculus OX=10090 GN=Atp2a1 PE=1 SV=1;Sarcoplasmic/endoplasmic reticulum calcium ATPase 2 OS=Mus musculus OX=10090 GN=Atp2a2 PE=1 SV=2	2		-1.77824	-0.234515	0.104599	0.448796	0.158462	17.4574	16.5987	18.4754	18.6682	19.0137	18.5989	2	2	2.8	108.812	0	0	0	0	0	0	0
P13439	Uridine 5-monophosphate synthase;Orotate phosphoribosyltransferase;Orotidine 5-phosphate decarboxylase	Umps	Uridine 5-monophosphate synthase OS=Mus musculus OX=10090 GN=Umps PE=1 SV=3	3		-1.78605	-0.608918	0.297352	0.331456	0.439506	18.3918	16.4085	18.7991	18.3554	18.8013	19.5711	3	3	7.7	110.327	1	0	0	0	0	0	1
Q9QWT9	Kinesin-like protein KIFC1	Kifc1	Kinesin-like protein KIFC1 OS=Mus musculus OX=10090 GN=Kifc1 PE=1 SV=2	2		-1.80581	-0.044384	0.417476	0.832709	0.426666	15.5843	18.3813	18.6628	18.8257	18.9466	18.6307	2	2	3.7	109.031	3	0	0	0	2	0	1
Q9R0N0	Galactokinase	Galk1	Galactokinase OS=Mus musculus OX=10090 GN=Galk1 PE=1 SV=2	3		-1.81729	-0.668989	0.272507	0.203589	0.390379	16.8019	18.4893	19.0565	18.5313	19.5694	19.3563	3	3	9.2	111.805	3	0	0	0	2	0	1
P54071	Isocitrate dehydrogenase [NADP], mitochondrial	Idh2	Isocitrate dehydrogenase [NADP], mitochondrial OS=Mus musculus OX=10090 GN=Idh2 PE=1 SV=3	2		-1.85567	-0.303613	0.00928961	0.151075	0.0100598	19.026	19.1353	20.5413	20.7241	21.0335	20.8392	2	2	6	121.299	5	0	0	1	2	1	1
P68254	14-3-3 protein theta	Ywhaq	14-3-3 protein theta OS=Mus musculus OX=10090 GN=Ywhaq PE=1 SV=1	2		-1.87961	0.209487	0.140059	0.537338	0.13329	16.7604	17.8367	19.5643	19.211	18.959	19.3973	3	2	14.7	111.729	4	0	0	1	1	0	2
Q80VD1	Protein FAM98B	Fam98b	Protein FAM98B OS=Mus musculus OX=10090 GN=Fam98b PE=1 SV=1	5		-1.91932	-3.55829	0.44119	0.0722096	0.499101	23.0307	19.7602	19.8233	19.6897	22.877	23.7527	5	5	14.7	128.934	8	0	0	0	0	3	5
Q62318	Transcription intermediary factor 1-beta	Trim28	Transcription intermediary factor 1-beta OS=Mus musculus OX=10090 GN=Trim28 PE=1 SV=3	23		-1.94126	-0.209561	0.00320034	0.208861	0.014447	22.3753	22.2582	24.0639	24.033	24.1824	24.3336	23	23	43.5	141.246	83	4	6	17	25	16	15
Q8BGQ7	Alanine--tRNA ligase, cytoplasmic	Aars	Alanine--tRNA ligase, cytoplasmic OS=Mus musculus OX=10090 GN=Aars1 PE=1 SV=1	7		-1.99147	-2.01768	0.039572	0.0290922	0.946982	18.0515	18.6551	18.4695	18.1847	20.1121	20.5775	7	7	10	114.05	5	0	0	0	0	1	4
Q9ERU9	E3 SUMO-protein ligase RanBP2	Ranbp2	E3 SUMO-protein ligase RanBP2 OS=Mus musculus OX=10090 GN=Ranbp2 PE=1 SV=2	2		-2.00535	-1.32426	0.122387	0.1843	0.0456044	16.4661	16.6588	17.3552	17.1319	18.1328	19.0028	2	2	0.9	104.748	2	0	0	0	0	0	2
Q9CZN7	Serine hydroxymethyltransferase	Shmt2	Serine hydroxymethyltransferase, mitochondrial OS=Mus musculus OX=10090 GN=Shmt2 PE=1 SV=1	2		-2.02299	0.865952	0.39909	0.19847	0.288357	18.8858	15.9351	19.9574	20.6414	19.2734	19.5935	2	2	6.3	114.287	3	0	0	1	1	0	1
O70251	Elongation factor 1-beta	Eef1b	Elongation factor 1-beta OS=Mus musculus OX=10090 GN=Eef1b PE=1 SV=5	2		-2.03082	-1.25021	0.528664	0.204725	0.786647	15.7281	20.2107	18.8225	18.6776	19.5662	20.4343	2	2	12.4	113.44	3	0	2	0	0	0	1
P54276	DNA mismatch repair protein Msh6	Msh6	DNA mismatch repair protein Msh6 OS=Mus musculus OX=10090 GN=Msh6 PE=1 SV=3	17		-2.06415	0.0422745	0.0619931	0.370422	0.0565466	18.9022	19.3069	21.1823	21.2395	21.1625	21.1748	17	17	16.7	122.968	27	0	0	6	8	6	7
P43247	DNA mismatch repair protein Msh2	Msh2	DNA mismatch repair protein Msh2 OS=Mus musculus OX=10090 GN=Msh2 PE=1 SV=1	12		-2.23033	0.385571	0.0716829	0.433674	0.076558	18.0268	18.9636	20.9152	21.3069	21.0485	20.4025	12	12	18.8	120.663	17	0	1	6	6	3	1
Q9CPP0	Nucleoplasmin-3	Npm3	Nucleoplasmin-3 OS=Mus musculus OX=10090 GN=Npm3 PE=1 SV=3	2		-2.23091	-0.412241	0.0934907	0.586059	0.113654	17.085	17.7671	19.2867	19.2027	20.1995	19.1144	2	2	17.7	112.655	4	0	0	1	1	1	1
P70168	Importin subunit beta-1	Kpnb1	Importin subunit beta-1 OS=Mus musculus OX=10090 GN=Kpnb1 PE=1 SV=2	3		-2.27727	-1.12233	0.161005	0.387393	0.377701	17.556	18.8188	20.1356	18.5491	20.5888	20.3405	3	3	5.5	115.989	4	0	0	1	0	1	2
P62259	14-3-3 protein epsilon	Ywhae	14-3-3 protein epsilon OS=Mus musculus OX=10090 GN=Ywhae PE=1 SV=1	5		-2.27978	0.0419559	0.123768	0.808926	0.10071	18.6023	19.5104	21.5131	21.2431	21.3053	21.367	5	4	22	123.541	13	0	0	4	4	2	3
Q61171	Peroxiredoxin-2	Prdx2	Peroxiredoxin-2 OS=Mus musculus OX=10090 GN=Prdx2 PE=1 SV=3	2		-2.31455	-0.888057	0.35381	0.347044	0.522352	16.2688	19.3399	19.4034	19.0582	20.6871	19.5507	2	2	14.6	114.308	1	0	0	0	0	1	0
Q6PR54	Telomere-associated protein RIF1	Rif1	Telomere-associated protein RIF1 OS=Mus musculus OX=10090 GN=Rif1 PE=1 SV=2	6		-2.35674	0.413645	0.106984	0.632734	0.100823	17.3027	18.2898	20.6682	20.465	19.516	20.7899	6	6	3.6	117.032	8	0	0	2	4	0	2
P06151	L-lactate dehydrogenase A chain	Ldha	L-lactate dehydrogenase A chain OS=Mus musculus OX=10090 GN=Ldha PE=1 SV=3	2		-2.38058	0.156132	0.0194335	0.707567	0.0252095	16.9789	16.4992	18.9744	19.5772	19.2962	18.9431	2	2	7.2	110.269	2	0	0	0	2	0	0
Q1HFZ0	tRNA (cytosine(34)-C(5))-methyltransferase	Nsun2	RNA cytosine C(5)-methyltransferase NSUN2 OS=Mus musculus OX=10090 GN=Nsun2 PE=1 SV=2	3		-2.43525	-0.0184145	0.136868	0.883399	0.131387	15.5817	16.6645	18.635	18.4449	18.6066	18.5101	3	3	5.8	106.443	0	0	0	0	0	0	0
Q9CW03	Structural maintenance of chromosomes protein 3	Smc3	Structural maintenance of chromosomes protein 3 OS=Mus musculus OX=10090 GN=Smc3 PE=1 SV=2	3		-2.50861	-0.412457	0.305857	0.534677	0.372905	19.3229	16.5031	20.2157	19.8026	20.8881	19.9552	3	3	3.1	116.688	3	0	0	1	1	1	0
Q9D7N3	28S ribosomal protein S9, mitochondrial	Mrps9	28S ribosomal protein S9, mitochondrial OS=Mus musculus OX=10090 GN=Mrps9 PE=1 SV=3	7		-2.54881	-1.45835	0.139918	0.323964	0.390083	14.5465	15.309	15.2023	16.8341	16.705	18.2482	7	7	24.9	96.8451	0	0	0	0	0	0	0
Q6PE01	U5 small nuclear ribonucleoprotein 40 kDa protein	Snrnp40	U5 small nuclear ribonucleoprotein 40 kDa protein OS=Mus musculus OX=10090 GN=Snrnp40 PE=1 SV=1	3		-2.63952	0.0294189	0.0855246	0.94938	0.0984896	17.0284	15.8629	19.3595	18.8696	19.4101	18.7602	3	3	18.4	109.291	0	0	0	0	0	0	0
Q9CXW3	Calcyclin-binding protein	Cacybp	Calcyclin-binding protein OS=Mus musculus OX=10090 GN=Cacybp PE=1 SV=1	3		-2.68654	-0.298807	0.292549	0.400632	0.320445	16.3432	19.0349	19.8501	20.3035	20.5249	20.2264	3	3	22.7	116.283	4	0	0	0	3	1	0
Q91VR5	ATP-dependent RNA helicase DDX1	Ddx1	ATP-dependent RNA helicase DDX1 OS=Mus musculus OX=10090 GN=Ddx1 PE=1 SV=1	8		-2.74951	-2.46305	0.0240155	0.0399342	0.239062	20.2417	19.9721	20.4903	20.2964	23.1093	22.6035	8	8	17.6	126.713	16	1	1	2	2	4	6
P10711	Transcription elongation factor A protein 1	Tcea1	Transcription elongation factor A protein 1 OS=Mus musculus OX=10090 GN=Tcea1 PE=1 SV=2	2		-2.93712	0.0688906	0.279649	0.898324	0.277981	18.8193	15.8956	20.6634	20.0636	20.6621	19.9271	2	2	9	116.031	5	0	0	2	1	1	1
Q60953	Protein PML	Pml	Protein PML OS=Mus musculus OX=10090 GN=Pml PE=1 SV=3	4		-3.00587	-1.29465	0.148567	0.137313	0.302475	17.9203	16.1022	18.5486	18.8964	19.6388	20.3955	4	4	6	111.502	6	0	0	0	1	1	4
Q6P5D8	Structural maintenance of chromosomes flexible hinge domain-containing protein 1	Smchd1	Structural maintenance of chromosomes flexible hinge domain-containing protein 1 OS=Mus musculus OX=10090 GN=Smchd1 PE=1 SV=2	2		-3.03052	-0.928182	0.001237	0.0729993	0.0219299	16.709	16.7842	18.966	18.7319	19.7576	19.7966	2	2	1.5	110.745	2	0	0	0	0	0	2
O35381;Q64G17	Acidic leucine-rich nuclear phosphoprotein 32 family member A;Putative acidic leucine-rich nuclear phosphoprotein 32 family member C	Anp32a;Anp32c	Acidic leucine-rich nuclear phosphoprotein 32 family member A OS=Mus musculus OX=10090 GN=Anp32a PE=1 SV=1;Putative acidic leucine-rich nuclear phosphoprotein 32 family member C OS=Mus musculus OX=10090 GN=Anp32c PE=2 SV=3	2		-3.11983	0.83035	0.0466445	0.224522	0.00178913	16.1874	16.3985	20.3194	20.1668	19.0858	19.7397	2	2	9.7	111.897	1	0	0	0	0	0	1
P05064	Fructose-bisphosphate aldolase A	Aldoa	Fructose-bisphosphate aldolase A OS=Mus musculus OX=10090 GN=Aldoa PE=1 SV=2	3		-3.14842	-1.47451	0.18715	0.0502499	0.325326	16.5782	18.4876	19.0694	19.3442	20.6528	20.7099	3	3	13.2	114.842	6	0	0	0	2	2	2
Q5SVQ0	Histone acetyltransferase KAT7	Kat7	Histone acetyltransferase KAT7 OS=Mus musculus OX=10090 GN=Kat7 PE=1 SV=1	3		-3.29441	0.576457	0.0115721	0.110832	0.023123	15.9635	15.9354	19.6723	19.9683	19.1685	19.3192	3	3	8	110.027	6	0	0	2	3	0	1
Q61029;Q61033	Lamina-associated polypeptide 2, isoforms beta/delta/epsilon/gamma;Lamina-associated polypeptide 2, isoforms alpha/zeta	Tmpo	Lamina-associated polypeptide 2, isoforms beta/delta/epsilon/gamma OS=Mus musculus OX=10090 GN=Tmpo PE=1 SV=4;Lamina-associated polypeptide 2, isoforms alpha/zeta OS=Mus musculus OX=10090 GN=Tmpo PE=1 SV=4	4		-3.33412	-2.23026	0.075398	0.170305	0.154628	17.1566	16.6045	18.0029	17.966	19.6023	20.827	4	4	11.5	110.159	6	0	0	0	0	2	4
P52293	Importin subunit alpha-1	Kpna2	Importin subunit alpha-1 OS=Mus musculus OX=10090 GN=Kpna2 PE=1 SV=2	7		-3.34813	-2.38069	0.00097419	0.0431923	0.130065	19.3732	19.461	20.1658	20.6032	22.8274	22.7031	7	7	19.8	125.134	12	0	0	1	3	4	4
Q3V0C5	Ubiquitin carboxyl-terminal hydrolase 48	Usp48	Ubiquitin carboxyl-terminal hydrolase 48 OS=Mus musculus OX=10090 GN=Usp48 PE=1 SV=2	2		-3.55306	0.151142	0.0473908	0.661436	0.0439278	16.3626	15.4384	19.3925	19.8169	19.2457	19.6614	2	2	3	109.918	3	0	0	1	1	0	1
P14602	Heat shock protein beta-1	Hspb1	Heat shock protein beta-1 OS=Mus musculus OX=10090 GN=Hspb1 PE=1 SV=3	2		-3.87632	-0.55979	0.050813	0.391995	0.00230568	16.4143	16.6434	19.9438	19.747	20.8131	19.9973	2	2	12.4	113.559	1	0	0	0	0	0	1
Q99LF4	tRNA-splicing ligase RtcB homolog	Rtcb	RNA-splicing ligase RtcB homolog OS=Mus musculus OX=10090 GN=Rtcb PE=1 SV=1	8		-4.09353	-3.81483	0.0658969	0.0754359	0.122481	19.5222	19.6825	19.8336	19.9285	23.226	24.1658	8	8	19.2	126.358	10	0	0	0	1	3	6
P15105	Glutamine synthetase	Glul	Glutamine synthetase OS=Mus musculus OX=10090 GN=Glul PE=1 SV=6	2		-5.69169	-5.55289	0.00459341	0.0109592	0.704676	15.3057	15.6943	15.8867	15.3909	21.0808	21.3026	2	2	8	104.661	3	0	0	0	0	2	1
Q9CQE8	UPF0568 protein C14orf166 homolog		RNA transcription, translation and transport factor protein OS=Mus musculus OX=10090 GN=RTRAF PE=1 SV=1	6		-7.7645	-7.89925	0.0501571	0.0364621	0.877918	15.9434	14.7116	14.7354	15.6501	23.0715	23.1125	6	6	31.1	107.224	7	0	0	0	0	3	4
CON__Q9U6Y5		GFP		8	+	-11.2563	-10.7163	0.00629732	0.0383454	0.590392	15.0923	15.0975	14.9148	16.3549	26.2393	26.463	8	8	51.8	114.162	23	0	0	0	0	10	13

## Sheet: 3_safb_log2_pass_no_con
Majority protein IDs	Protein names	Gene names	Fasta headers	Razor + unique peptides	Student's T-test Difference FL SAFB_eGFP	Student's T-test Difference safb∆dd2_Egfp	Student's T-test p-value FL SAFB_eGFP	Student's T-test p-value safb∆dd2_eGFP	Student's T-test p-value FL SAFB_safb∆dd2	Log2 LFQ intensity 1 FL SAFB R1	Log2 LFQ intensity 2 FL SAFB R2	Log2 LFQ intensity 3 safb∆dd2 R1	Log2 LFQ intensity 4 safb∆dd2 R2	Log2 LFQ intensity 5 eGFP R1	Log2 LFQ intensity 6 eGFP R2	Peptides	Unique peptides	Sequence coverage [%]	Summed Log2 LFQ intensity	MS/MS count	MS/MS count 1	MS/MS count 2	MS/MS count 3	MS/MS count 4	MS/MS count 5	MS/MS count 6
P61979	Heterogeneous nuclear ribonucleoprotein K	Hnrnpk	Heterogeneous nuclear ribonucleoprotein K OS=Mus musculus OX=10090 GN=Hnrnpk PE=1 SV=1	25	1.53974	0.308901	0.00268349	0.0453032	0.00551143	23.3403	23.4558	22.2063	22.128	21.8077	21.9088	25	25	52.5	134.847	22	4	7	3	3	3	2
P11404	Fatty acid-binding protein, heart	Fabp3	Fatty acid-binding protein, heart OS=Mus musculus OX=10090 GN=Fabp3 PE=1 SV=5	2	5.59783	-0.294609	0.00285588	0.111557	0.000787871	22.5816	22.3689	16.6634	16.5022	16.9284	16.8264	2	2	18	111.871	0	0	0	0	0	0	0
O88569	Heterogeneous nuclear ribonucleoproteins A2/B1	Hnrnpa2b1	Heterogeneous nuclear ribonucleoproteins A2/B1 OS=Mus musculus OX=10090 GN=Hnrnpa2b1 PE=1 SV=2	20	1.84887	0.0703096	0.00292748	0.884699	0.133305	22.3596	22.3001	20.168	20.9346	20.4307	20.5313	20	19	61.5	126.724	13	3	2	0	4	2	2
Q60749	KH domain-containing, RNA-binding, signal transduction-associated protein 1	Khdrbs1	KH domain-containing, RNA-binding, signal transduction-associated protein 1 OS=Mus musculus OX=10090 GN=Khdrbs1 PE=1 SV=2	4	1.91786	0.429633	0.00306423	0.165254	0.0368503	20.783	20.7184	19.1453	19.3797	18.8468	18.8189	4	4	19	117.692	3	1	1	0	1	0	0
Q99J09	Methylosome protein 50	Wdr77	Methylosome protein 50 OS=Mus musculus OX=10090 GN=Wdr77 PE=1 SV=1	5	2.99612	1.87248	0.00666722	0.0331728	0.0928486	24.5422	24.316	23.5496	23.0613	21.5943	21.2717	5	5	24.3	138.335	15	4	3	4	4	0	0
Q8BG81	Polymerase delta-interacting protein 3	Poldip3	Polymerase delta-interacting protein 3 OS=Mus musculus OX=10090 GN=Poldip3 PE=1 SV=1	2	1.6655	1.17297	0.0104783	0.0305446	0.0917494	18.4935	18.7235	18.0504	18.1816	17.068	16.818	2	2	7.9	107.335	0	0	0	0	0	0	0
Q99020	Heterogeneous nuclear ribonucleoprotein A/B	Hnrnpab	Heterogeneous nuclear ribonucleoprotein A/B OS=Mus musculus OX=10090 GN=Hnrnpab PE=1 SV=1	9	1.21039	0.120482	0.0122108	0.419432	0.0116959	22.5678	22.7254	21.5031	21.6102	21.534	21.3384	9	9	27	131.279	18	2	4	3	5	2	2
P12970	60S ribosomal protein L7a	Rpl7a	60S ribosomal protein L7a OS=Mus musculus OX=10090 GN=Rpl7a PE=1 SV=2	8	1.10677	1.07545	0.0123311	0.0185572	0.780002	22.1445	22.3052	22.1404	22.2467	21.0274	21.2088	8	8	26.3	131.073	10	0	1	2	5	1	1
Q91VJ4	Serine/threonine-protein kinase 38	Stk38	Serine/threonine-protein kinase 38 OS=Mus musculus OX=10090 GN=Stk38 PE=1 SV=1	4	5.63529	4.72132	0.0155678	0.0268398	0.0288313	21.6208	21.3937	20.6744	20.5122	15.5854	16.1585	4	4	12.3	115.945	7	1	2	2	2	0	0
Q61656	Probable ATP-dependent RNA helicase DDX5	Ddx5	Probable ATP-dependent RNA helicase DDX5 OS=Mus musculus OX=10090 GN=Ddx5 PE=1 SV=2	27	1.62843	-0.0990505	0.0160346	0.356979	0.0344873	23.4593	23.6992	21.8231	21.8804	21.8838	22.0178	27	23	46.1	134.764	39	8	8	4	10	3	6
O08583	THO complex subunit 4	Alyref	THO complex subunit 4 OS=Mus musculus OX=10090 GN=Alyref PE=1 SV=3	5	1.19797	1.06964	0.0164365	0.138329	0.694055	21.6493	21.5039	21.2027	21.6939	20.4116	20.3457	5	5	27.5	126.807	12	1	3	2	5	0	1
Q8BG05	Heterogeneous nuclear ribonucleoprotein A3	Hnrnpa3	Heterogeneous nuclear ribonucleoprotein A3 OS=Mus musculus OX=10090 GN=Hnrnpa3 PE=1 SV=1	14	1.65441	0.125045	0.0170694	0.601644	0.0129016	22.9996	23.2425	21.4656	21.7177	21.3088	21.6244	15	14	34.3	132.359	27	4	5	5	5	3	5
Q9D8E6	60S ribosomal protein L4	Rpl4	60S ribosomal protein L4 OS=Mus musculus OX=10090 GN=Rpl4 PE=1 SV=3	9	1.21815	1.02337	0.0199764	0.0378154	0.106779	22.9994	23.1045	22.8202	22.8941	21.9326	21.7349	9	9	23.9	135.486	16	2	3	2	6	1	2
Q99JX7	Nuclear RNA export factor 1	Nxf1	Nuclear RNA export factor 1 OS=Mus musculus OX=10090 GN=Nxf1 PE=1 SV=3	7	1.01125	0.1955	0.0209073	0.106417	0.00575025	19.8966	19.9869	19.0866	19.1654	18.9195	18.9415	7	7	18.1	115.996	3	1	2	0	0	0	0
Q9Z204	Heterogeneous nuclear ribonucleoproteins C1/C2	Hnrnpc	Heterogeneous nuclear ribonucleoproteins C1/C2 OS=Mus musculus OX=10090 GN=Hnrnpc PE=1 SV=1	18	1.85141	0.216512	0.0216647	0.00596632	0.0235995	23.2845	23.4117	21.7191	21.7073	21.4992	21.4941	18	18	50.8	133.116	19	3	6	5	3	1	1
O88291	DBIRD complex subunit ZNF326	Znf326	DBIRD complex subunit ZNF326 OS=Mus musculus OX=10090 GN=Znf326 PE=1 SV=1	7	1.3346	-0.334937	0.0245594	0.548877	0.115791	17.7907	18.0834	16.6634	15.8717	16.4485	16.7564	7	7	16.9	101.614	0	0	0	0	0	0	0
P62918	60S ribosomal protein L8	Rpl8	60S ribosomal protein L8 OS=Mus musculus OX=10090 GN=Rpl8 PE=1 SV=2	2	1.09568	1.00403	0.0263732	0.0666981	0.541745	22.1297	22.037	21.8859	22.0976	20.9905	20.9849	2	2	10.5	130.126	10	1	1	2	3	2	1
Q7TMK9	Heterogeneous nuclear ribonucleoprotein Q	Syncrip	Heterogeneous nuclear ribonucleoprotein Q OS=Mus musculus OX=10090 GN=Syncrip PE=1 SV=2	21	1.6389	1.05282	0.0278807	0.102956	0.172314	20.8171	21.1194	20.165	20.5994	19.401	19.2578	21	21	40.4	121.36	8	1	3	1	3	0	0
D3YXK2	Scaffold attachment factor B1	Safb	Scaffold attachment factor B1 OS=Mus musculus OX=10090 GN=Safb PE=1 SV=2	23	7.30195	13.3201	0.031218	0.0188933	0.0020134	23.4737	23.1114	29.4492	29.1722	15.4378	16.5434	23	23	21.9	137.188	126	7	7	54	58	0	0
P62320	Small nuclear ribonucleoprotein Sm D3	Snrpd3	Small nuclear ribonucleoprotein Sm D3 OS=Mus musculus OX=10090 GN=Snrpd3 PE=1 SV=1	2	1.0935	0.140999	0.0317824	0.607457	0.0772822	21.2464	21.4805	20.611	20.211	20.2104	20.3296	2	2	13.5	124.089	5	1	1	1	1	0	1
P35980	60S ribosomal protein L18	Rpl18	60S ribosomal protein L18 OS=Mus musculus OX=10090 GN=Rpl18 PE=1 SV=3	5	1.14621	0.86338	0.0341396	0.0179121	0.262201	22.4195	22.7072	22.2048	22.3563	21.5031	21.3312	5	5	29.8	132.522	15	2	3	2	3	2	3
P62996	Transformer-2 protein homolog beta	Tra2b	Transformer-2 protein homolog beta OS=Mus musculus OX=10090 GN=Tra2b PE=1 SV=1	4	3.41832	0.219093	0.0362216	0.583119	0.0181272	23.4978	23.654	20.187	20.5663	20.429	19.8862	4	4	17.4	128.22	13	3	5	1	2	1	1
P49312	Heterogeneous nuclear ribonucleoprotein A1;Heterogeneous nuclear ribonucleoprotein A1, N-terminally processed	Hnrnpa1	Heterogeneous nuclear ribonucleoprotein A1 OS=Mus musculus OX=10090 GN=Hnrnpa1 PE=1 SV=2	15	1.70992	0.083209	0.0434715	0.798111	0.0466919	23.7909	24.104	22.0677	22.5738	22.1939	22.2812	16	14	58.1	137.011	26	4	4	4	7	2	5
Q8CFE4	SCY1-like protein 2	Scyl2	SCY1-like protein 2 OS=Mus musculus OX=10090 GN=Scyl2 PE=1 SV=1	3	3.31238	2.80758	0.0453438	0.0351135	0.0914374	20.2717	20.2326	19.663	19.8317	16.6967	17.1829	3	3	4.4	113.879	5	1	1	1	2	0	0
O89086	RNA-binding protein 3	Rbm3	RNA-binding protein 3 OS=Mus musculus OX=10090 GN=Rbm3 PE=1 SV=1	5	1.52044	-0.743507	0.0456107	0.0684722	0.0360194	18.6381	18.5782	16.4964	16.1919	17.2207	16.9547	5	5	34.6	104.08	0	0	0	0	0	0	0
Q8JZQ9	Eukaryotic translation initiation factor 3 subunit B	Eif3b	Eukaryotic translation initiation factor 3 subunit B OS=Mus musculus OX=10090 GN=Eif3b PE=1 SV=1	5	1.23353	0.0201588	0.0491201	0.951038	0.128364	20.6436	20.5977	19.6602	19.1543	19.275	19.4992	5	5	10.2	118.83	2	1	1	0	0	0	0
Q8BL97	Serine/arginine-rich splicing factor 7	Srsf7	Serine/arginine-rich splicing factor 7 OS=Mus musculus OX=10090 GN=Srsf7 PE=1 SV=1	4	2.49903	0.312382	0.0550678	0.215727	0.0328166	22.488	22.9706	20.4184	20.6669	20.1895	20.271	5	4	17.2	127.005	4	0	2	1	1	0	0
Q9R0U0	Serine/arginine-rich splicing factor 10	Srsf10	Serine/arginine-rich splicing factor 10 OS=Mus musculus OX=10090 GN=Srsf10 PE=1 SV=2	6	4.31318	0.717649	0.0569901	0.328842	0.00757933	22.2241	22.1295	18.5866	18.5759	17.456	18.2713	6	6	23.7	117.243	6	3	3	0	0	0	0
P14148	60S ribosomal protein L7	Rpl7	60S ribosomal protein L7 OS=Mus musculus OX=10090 GN=Rpl7 PE=1 SV=2	7	1.47764	1.73444	0.0614874	0.0249731	0.419276	22.4662	22.3595	22.4652	22.8741	20.7497	21.1207	7	7	21.9	132.035	7	1	1	1	2	1	1
Q8CH25	SAFB-like transcription modulator	Sltm	SAFB-like transcription modulator OS=Mus musculus OX=10090 GN=Sltm PE=1 SV=1	4	1.35063	-1.20648	0.0619931	0.43819	0.237655	21.3308	21.4314	19.8289	17.819	20.2024	19.8585	4	4	4.1	120.471	3	1	2	0	0	0	0
Q501J6	Probable ATP-dependent RNA helicase DDX17	Ddx17	Probable ATP-dependent RNA helicase DDX17 OS=Mus musculus OX=10090 GN=Ddx17 PE=1 SV=1	13	1.67172	0.184898	0.0637005	0.629331	0.111991	20.7228	20.6866	18.9504	19.4854	19.2076	18.8584	17	13	31.4	117.911	7	2	2	0	3	0	0
Q91VM5;Q9WV02	RNA binding motif protein, X-linked-like-1;RNA-binding motif protein, X chromosome;RNA-binding motif protein, X chromosome, N-terminally processed	Rbmxl1;Rbmx	RNA binding motif protein, X-linked-like-1 OS=Mus musculus OX=10090 GN=Rbmxl1 PE=2 SV=1;RNA-binding motif protein, X chromosome OS=Mus musculus OX=10090 GN=Rbmx PE=1 SV=1	14	4.83592	0.719065	0.0702444	0.445065	0.0406679	24.654	24.9154	20.2757	21.0599	19.3308	20.5667	14	14	36.6	130.803	16	5	4	2	3	0	2
Q9Z1X4	Interleukin enhancer-binding factor 3	Ilf3	Interleukin enhancer-binding factor 3 OS=Mus musculus OX=10090 GN=Ilf3 PE=1 SV=2	22	1.05954	0.218637	0.072234	0.555234	0.134534	19.3477	19.7252	18.4321	18.959	18.5622	18.3916	22	18	30.3	113.418	3	0	1	1	1	0	0
Q62093	Serine/arginine-rich splicing factor 2	Srsf2	Serine/arginine-rich splicing factor 2 OS=Mus musculus OX=10090 GN=Srsf2 PE=1 SV=4	3	2.02503	0.834769	0.0747849	0.226655	0.141459	21.8562	21.1536	20.6739	19.9553	19.6227	19.337	3	3	18.6	122.599	4	1	1	1	1	0	0
P62751	60S ribosomal protein L23a	Rpl23a	60S ribosomal protein L23a OS=Mus musculus OX=10090 GN=Rpl23a PE=1 SV=1	3	2.39334	2.38476	0.0761965	0.0402691	0.985026	21.6013	21.7293	21.2935	22.0199	19.5965	18.9474	3	3	25	125.188	8	1	2	2	3	0	0
Q3TWW8	Serine/arginine-rich splicing factor 6	Srsf6	Serine/arginine-rich splicing factor 6 OS=Mus musculus OX=10090 GN=Srsf6 PE=1 SV=1	4	2.6251	0.279891	0.0775455	0.625456	0.0064047	22.8115	22.5412	20.441	20.2213	20.4724	19.6301	4	3	13.6	126.118	5	2	2	1	0	0	0
P62754	40S ribosomal protein S6	Rps6	40S ribosomal protein S6 OS=Mus musculus OX=10090 GN=Rps6 PE=1 SV=1	3	1.0666	1.70424	0.0777905	0.021156	0.0595717	22.1485	22.2346	22.9265	22.7319	21.2854	20.9645	3	3	14.1	132.291	10	1	2	3	3	1	0
Q9D0B0	Serine/arginine-rich splicing factor 9	Srsf9	Serine/arginine-rich splicing factor 9 OS=Mus musculus OX=10090 GN=Srsf9 PE=1 SV=1	2	3.58071	-1.00062	0.0835303	0.389809	0.0895415	20.6973	20.9613	15.5333	16.9626	16.6945	17.8026	2	2	9	108.652	1	1	0	0	0	0	0
Q91WJ8	Far upstream element-binding protein 1	Fubp1	Far upstream element-binding protein 1 OS=Mus musculus OX=10090 GN=Fubp1 PE=1 SV=1	12	1.61698	-1.20201	0.096381	0.240181	0.123448	20.105	20.1639	17.8729	16.758	18.7736	18.2612	13	12	29.3	111.935	1	0	1	0	0	0	0
P36993	Protein phosphatase 1B	Ppm1b	Protein phosphatase 1B OS=Mus musculus OX=10090 GN=Ppm1b PE=1 SV=1	7	2.80428	2.20491	0.0993278	0.105196	0.156079	21.8907	22.1101	21.6027	21.1994	18.6969	19.6954	7	7	27.9	125.195	9	1	2	2	3	0	1
P47911	60S ribosomal protein L6	Rpl6	60S ribosomal protein L6 OS=Mus musculus OX=10090 GN=Rpl6 PE=1 SV=3	8	1.95783	1.67396	0.100998	0.139259	0.352471	22.2017	21.8279	21.5984	21.8634	19.6185	20.4954	8	8	26.7	127.605	16	2	4	3	6	0	1
Q8R081	Heterogeneous nuclear ribonucleoprotein L	Hnrnpl	Heterogeneous nuclear ribonucleoprotein L OS=Mus musculus OX=10090 GN=Hnrnpl PE=1 SV=2	18	1.5867	0.00671005	0.102998	0.983318	0.141545	21.8693	22.6851	20.8061	20.5884	20.4429	20.9381	18	18	38.1	127.33	9	1	3	2	1	0	2
Q64012	RNA-binding protein Raly	Raly	RNA-binding protein Raly OS=Mus musculus OX=10090 GN=Raly PE=1 SV=3	13	3.32822	1.2232	0.107898	0.288402	0.256325	18.4562	20.2527	17.2138	17.285	15.4286	16.6239	13	13	40.1	105.26	2	0	2	0	0	0	0
P84104	Serine/arginine-rich splicing factor 3	Srsf3	Serine/arginine-rich splicing factor 3 OS=Mus musculus OX=10090 GN=Srsf3 PE=1 SV=1	5	4.77648	1.32236	0.128646	0.397495	0.0409971	23.5921	23.5382	19.875	20.3471	19.769	17.8083	5	4	31.7	124.93	6	2	3	0	1	0	0
Q8CIG8	Protein arginine N-methyltransferase 5	Prmt5	Protein arginine N-methyltransferase 5 OS=Mus musculus OX=10090 GN=Prmt5 PE=1 SV=3	15	3.68038	2.62812	0.130915	0.164373	0.0995024	24.2252	24.0584	23.3112	22.8679	19.6735	21.2493	15	15	28.7	135.386	33	7	9	6	9	0	2
O35737	Heterogeneous nuclear ribonucleoprotein H;Heterogeneous nuclear ribonucleoprotein H, N-terminally processed	Hnrnph1	Heterogeneous nuclear ribonucleoprotein H OS=Mus musculus OX=10090 GN=Hnrnph1 PE=1 SV=3	15	1.32274	0.168897	0.131365	0.68658	0.0102816	22.2802	22.4397	21.2625	21.1497	21.3523	20.7222	15	9	46.1	129.207	27	5	9	5	4	2	2
A2AKX3	Probable helicase senataxin	Setx	Probable helicase senataxin OS=Mus musculus OX=10090 GN=Setx PE=1 SV=1	4	1.931	0.951429	0.146103	0.206182	0.356332	19.0971	20.3352	18.6692	18.8039	17.4472	18.1231	4	4	1.9	112.476	6	0	4	0	2	0	0
Q9CR57	60S ribosomal protein L14	Rpl14	60S ribosomal protein L14 OS=Mus musculus OX=10090 GN=Rpl14 PE=1 SV=3	3	1.24888	0.811039	0.176411	0.235563	0.514004	21.0861	22.0181	20.9654	21.263	19.9399	20.6665	3	3	17.1	125.939	10	2	1	2	4	0	1
O35326	Serine/arginine-rich splicing factor 5	Srsf5	Serine/arginine-rich splicing factor 5 OS=Mus musculus OX=10090 GN=Srsf5 PE=1 SV=2	4	3.39412	0.875553	0.184353	0.544775	0.0294398	21.2248	21.2144	18.5833	18.8188	16.8141	18.8368	4	4	19.3	115.492	5	2	3	0	0	0	0
Q6PDM2	Serine/arginine-rich splicing factor 1	Srsf1	Serine/arginine-rich splicing factor 1 OS=Mus musculus OX=10090 GN=Srsf1 PE=1 SV=3	5	3.40425	0.745491	0.191965	0.630584	0.0198108	20.6738	21.1783	18.4305	18.1041	16.3826	18.661	5	5	24.2	113.43	3	1	2	0	0	0	0
P62301	40S ribosomal protein S13	Rps13	40S ribosomal protein S13 OS=Mus musculus OX=10090 GN=Rps13 PE=1 SV=2	4	1.01851	0.892481	0.196422	0.121435	0.774975	21.0532	21.7063	21.4313	21.0761	20.3809	20.3416	4	4	25.2	125.989	8	0	2	3	2	1	0
Q9D883	Splicing factor U2AF 35 kDa subunit	U2af1	Splicing factor U2AF 35 kDa subunit OS=Mus musculus OX=10090 GN=U2af1 PE=1 SV=4	3	1.8151	0.549405	0.198539	0.16475	0.260796	22.6848	21.5138	20.6866	20.9806	20.2733	20.2951	3	3	18	126.434	8	2	1	1	2	1	1
P26443	Glutamate dehydrogenase 1, mitochondrial	Glud1	Glutamate dehydrogenase 1, mitochondrial OS=Mus musculus OX=10090 GN=Glud1 PE=1 SV=1	4	1.38646	-0.0166197	0.206469	0.947731	0.183228	20.0257	21.0184	19.3093	18.9286	19.0304	19.2408	4	4	10	117.553	5	0	3	1	1	0	0
Q8BGD9	Eukaryotic translation initiation factor 4B	Eif4b	Eukaryotic translation initiation factor 4B OS=Mus musculus OX=10090 GN=Eif4b PE=1 SV=1	2	2.73274	1.04255	0.207596	0.514068	0.32322	21.0907	20.9631	18.3926	20.2808	17.3632	19.2251	2	2	4.9	117.316	3	1	1	0	1	0	0
Q8VIG1	RE1-silencing transcription factor	Rest	RE1-silencing transcription factor OS=Mus musculus OX=10090 GN=Rest PE=1 SV=2	5	1.78215	1.59155	0.208598	0.243041	0.538858	20.0482	20.4576	20.2153	19.9094	17.7936	19.1479	5	5	6.4	117.572	5	0	2	2	1	0	0
P83882	60S ribosomal protein L36a	Rpl36a	60S ribosomal protein L36a OS=Mus musculus OX=10090 GN=Rpl36a PE=3 SV=2	2	1.09678	1.12199	0.218388	0.22011	0.765221	20.5195	20.3903	20.5014	20.4588	19.7639	18.9523	2	2	15.1	120.586	0	0	0	0	0	0	0
P84089	Enhancer of rudimentary homolog	Erh	Enhancer of rudimentary homolog OS=Mus musculus OX=10090 GN=Erh PE=1 SV=1	2	1.38628	2.70839	0.224905	0.108209	0.0245178	23.1152	23.0142	24.4959	24.2777	22.1965	21.1604	2	2	21.2	138.26	7	1	1	2	2	1	0
P70372	ELAV-like protein 1	Elavl1	ELAV-like protein 1 OS=Mus musculus OX=10090 GN=Elavl1 PE=1 SV=2	10	1.08912	-0.349425	0.24071	0.627712	0.102702	20.0307	20.7889	18.6766	19.2659	18.8072	19.8341	10	10	41.1	117.403	5	1	2	0	1	0	1
P53026	60S ribosomal protein L10a	Rpl10a	60S ribosomal protein L10a OS=Mus musculus OX=10090 GN=Rpl10a PE=1 SV=3	5	1.15082	1.07002	0.267551	0.302034	0.835961	22.2116	21.6488	22.0354	21.6634	20.1888	21.3699	5	5	22.6	129.118	5	0	0	2	1	0	2
Q923E4	NAD-dependent protein deacetylase sirtuin-1;SirtT1 75 kDa fragment	Sirt1	NAD-dependent protein deacetylase sirtuin-1 OS=Mus musculus OX=10090 GN=Sirt1 PE=1 SV=2	2	1.16861	3.56318	0.275095	0.0928453	0.00494179	17.3305	17.283	19.6455	19.7571	15.598	16.6783	2	2	4.7	106.292	2	0	0	1	1	0	0
Q9Z130	Heterogeneous nuclear ribonucleoprotein D-like	Hnrnpdl	Heterogeneous nuclear ribonucleoprotein D-like OS=Mus musculus OX=10090 GN=Hnrnpdl PE=1 SV=1	10	1.16724	-0.47897	0.325469	0.536177	0.251334	18.733	20.1366	17.6916	17.8855	18.8081	17.727	10	9	27.6	110.982	1	0	1	0	0	0	0
P62717	60S ribosomal protein L18a	Rpl18a	60S ribosomal protein L18a OS=Mus musculus OX=10090 GN=Rpl18a PE=1 SV=1	2	3.15091	2.04367	0.334393	0.483713	0.32232	20.5303	21.7808	20.1407	19.9559	19.9479	16.0613	2	2	10.2	118.417	2	0	1	0	0	1	0
Q8VC57	BTB/POZ domain-containing protein KCTD5	Kctd5	BTB/POZ domain-containing protein KCTD5 OS=Mus musculus OX=10090 GN=Kctd5 PE=1 SV=1	3	1.37025	0.699464	0.348044	0.475104	0.612178	22.1522	23.9359	21.7078	23.0387	21.3486	21.999	3	3	20.9	134.182	10	1	5	0	3	0	1
Q9CXY6	Interleukin enhancer-binding factor 2	Ilf2	Interleukin enhancer-binding factor 2 OS=Mus musculus OX=10090 GN=Ilf2 PE=1 SV=1	15	1.30913	0.840089	0.349615	0.477267	0.310939	19.1681	19.1413	18.9355	18.4357	17.0442	18.6468	15	15	51.5	111.372	0	0	0	0	0	0	0
Q9JII5	DAZ-associated protein 1	Dazap1	DAZ-associated protein 1 OS=Mus musculus OX=10090 GN=Dazap1 PE=1 SV=2	4	1.03612	0.728681	0.409452	0.482967	0.740991	18.8	17.3838	17.5522	18.0167	16.348	17.7636	4	4	17	105.864	0	0	0	0	0	0	0
Q8BP67	60S ribosomal protein L24	Rpl24	60S ribosomal protein L24 OS=Mus musculus OX=10090 GN=Rpl24 PE=1 SV=2	3	2.35148	2.64468	0.438813	0.404622	0.432698	21.5549	22.0298	22.0704	22.1006	17.4898	21.3919	3	3	19.1	126.637	4	0	1	1	2	0	0
Q9EP97	Sentrin-specific protease 3	Senp3	Sentrin-specific protease 3 OS=Mus musculus OX=10090 GN=Senp3 PE=1 SV=1	2	2.56601	-2.35684	0.451105	0.651242	0.412069	26.4022	26.1921	25.0972	17.6514	21.5296	25.9326	2	2	4.6	142.805	1	0	0	1	0	0	0
Q8BTI8	Serine/arginine repetitive matrix protein 2	Srrm2	Serine/arginine repetitive matrix protein 2 OS=Mus musculus OX=10090 GN=Srrm2 PE=1 SV=3	5	1.48734	1.23681	0.526489	0.583948	0.399187	19.6602	19.8859	19.3311	19.714	16.667	19.9044	5	5	3	115.163	1	0	1	0	0	0	0
P61358	60S ribosomal protein L27	Rpl27	60S ribosomal protein L27 OS=Mus musculus OX=10090 GN=Rpl27 PE=1 SV=2	2	1.56836	3.16263	0.624807	0.0804802	0.620737	16.3084	21.0119	20.249	20.2598	17.494	16.6896	2	2	15.4	112.013	4	0	1	1	1	1	0

## Sheet: 4_hnrnpu_pre_impute
Majority protein IDs	Protein names	Gene names	Fasta headers	Razor + unique peptides	Potential contaminant	Log2 LFQ intensity 5 eGFP R1	Log2 LFQ intensity 6 eGFP R2	Log2 LFQ intensity 9- hnrnpU R1	Log2 LFQ intensity 9- hnrnpU R2	Log2 LFQ intensity 10- hnrnpU∆RGG R1	Log2 LFQ intensity 10- hnrnpU∆RGG R2	Peptides	Unique peptides	Sequence coverage [%]	Summed Log2 LFQ Intensity	MS/MS count	MS/MS count 5	MS/MS count 6	MS/MS count 9-R1	MS/MS count 9-R2	MS/MS count 10-R1	MS/MS count 10-R2
P11404	Fatty acid-binding protein, heart	Fabp3	Fatty acid-binding protein, heart OS=Mus musculus OX=10090 GN=Fabp3 PE=1 SV=5	2		NaN	NaN	21.0065	21.0595	21.5847	21.8092	2	2	18	85.4599	0	0	0	0	0	0	0
Q9CQL4	39S ribosomal protein L20, mitochondrial	Mrpl20	39S ribosomal protein L20, mitochondrial OS=Mus musculus OX=10090 GN=Mrpl20 PE=1 SV=1	3		NaN	NaN	22.5022	21.3539	NaN	NaN	3	3	28.9	43.8561	4	0	0	2	2	0	0
Q9D773	39S ribosomal protein L2, mitochondrial	Mrpl2	39S ribosomal protein L2, mitochondrial OS=Mus musculus OX=10090 GN=Mrpl2 PE=1 SV=1	2		NaN	NaN	21.8721	21.5822	NaN	NaN	2	2	14.1	43.4543	6	0	0	3	3	0	0
O89086	RNA-binding protein 3	Rbm3	RNA-binding protein 3 OS=Mus musculus OX=10090 GN=Rbm3 PE=1 SV=1	5		NaN	NaN	22.48	22.5522	17.5318	17.9921	5	5	34.6	80.5562	11	0	0	6	5	0	0
P61358	60S ribosomal protein L27	Rpl27	60S ribosomal protein L27 OS=Mus musculus OX=10090 GN=Rpl27 PE=1 SV=2	2		NaN	NaN	20.4815	20.4289	20.8737	20.5438	2	2	15.4	82.3278	4	1	0	1	1	1	0
Q8VDT9	39S ribosomal protein L50, mitochondrial	Mrpl50	39S ribosomal protein L50, mitochondrial OS=Mus musculus OX=10090 GN=Mrpl50 PE=1 SV=2	3		NaN	NaN	21.6118	21.5344	NaN	NaN	3	3	34	43.1461	6	0	0	3	3	0	0
O88291	DBIRD complex subunit ZNF326	Znf326	DBIRD complex subunit ZNF326 OS=Mus musculus OX=10090 GN=Znf326 PE=1 SV=1	7		NaN	NaN	20.1625	20.047	NaN	NaN	7	7	16.9	40.2095	5	0	0	2	3	0	0
Q91VJ4	Serine/threonine-protein kinase 38	Stk38	Serine/threonine-protein kinase 38 OS=Mus musculus OX=10090 GN=Stk38 PE=1 SV=1	4		NaN	NaN	18.6359	19.3003	20.4995	20.8948	4	4	12.3	79.3306	4	0	0	0	0	2	2
Q3TBW2	39S ribosomal protein L10, mitochondrial	Mrpl10	39S ribosomal protein L10, mitochondrial OS=Mus musculus OX=10090 GN=Mrpl10 PE=1 SV=2	4		NaN	NaN	19.6842	19.5875	NaN	NaN	4	4	29	39.2716	6	0	0	4	2	0	0
Q921F4	Heterogeneous nuclear ribonucleoprotein L-like	Hnrnpll	Heterogeneous nuclear ribonucleoprotein L-like OS=Mus musculus OX=10090 GN=Hnrnpll PE=1 SV=3	8		NaN	NaN	20.601	20.7648	16.9051	17.3489	8	8	20.5	75.6198	12	0	0	6	6	0	0
Q8BP71;Q9JJ43	RNA binding protein fox-1 homolog 2;RNA binding protein fox-1 homolog 1	Rbfox2;Rbfox1	RNA binding protein fox-1 homolog 2 OS=Mus musculus OX=10090 GN=Rbfox2 PE=1 SV=2;RNA binding protein fox-1 homolog 1 OS=Mus musculus OX=10090 GN=Rbfox1 PE=1 SV=3	3		NaN	NaN	19.3811	19.3208	NaN	NaN	3	3	11.1	38.7019	1	0	0	0	1	0	0
Q9D125	28S ribosomal protein S25, mitochondrial	Mrps25	28S ribosomal protein S25, mitochondrial OS=Mus musculus OX=10090 GN=Mrps25 PE=1 SV=1	2		NaN	NaN	19.812	19.1402	NaN	NaN	2	2	17	38.9522	3	0	0	2	1	0	0
Q9CPR5	39S ribosomal protein L15, mitochondrial	Mrpl15	39S ribosomal protein L15, mitochondrial OS=Mus musculus OX=10090 GN=Mrpl15 PE=1 SV=1	5		NaN	NaN	20.4229	20.3764	NaN	NaN	5	5	22.4	40.7993	9	0	0	4	5	0	0
Q9CQT2	RNA-binding protein 7	Rbm7	RNA-binding protein 7 OS=Mus musculus OX=10090 GN=Rbm7 PE=1 SV=1	2		NaN	NaN	18.9316	19.213	NaN	NaN	2	2	19.6	38.1446	3	0	0	2	1	0	0
Q9D0B0	Serine/arginine-rich splicing factor 9	Srsf9	Serine/arginine-rich splicing factor 9 OS=Mus musculus OX=10090 GN=Srsf9 PE=1 SV=1	2		NaN	NaN	19.3457	19.3138	NaN	NaN	2	2	9	38.6595	2	0	0	1	1	0	0
P60824	Cold-inducible RNA-binding protein	Cirbp	Cold-inducible RNA-binding protein OS=Mus musculus OX=10090 GN=Cirbp PE=1 SV=1	5		NaN	NaN	20.9267	20.7411	NaN	16.989	5	5	38.4	58.6569	6	0	0	3	3	0	0
Q8K3Y3	Protein lin-28 homolog A	Lin28a	Protein lin-28 homolog A OS=Mus musculus OX=10090 GN=Lin28a PE=1 SV=1	3		NaN	NaN	19.9137	20.0806	18.2855	18.6626	3	3	23.9	76.9424	6	0	0	3	3	0	0
Q9D1N9	39S ribosomal protein L21, mitochondrial	Mrpl21	39S ribosomal protein L21, mitochondrial OS=Mus musculus OX=10090 GN=Mrpl21 PE=1 SV=1	6		NaN	NaN	20.8933	20.8066	NaN	NaN	6	6	31.1	41.7	10	0	0	4	6	0	0
Q9CY16	28S ribosomal protein S28, mitochondrial	Mrps28	28S ribosomal protein S28, mitochondrial OS=Mus musculus OX=10090 GN=Mrps28 PE=1 SV=1	2		NaN	NaN	19.9604	20.0874	NaN	NaN	2	2	12.9	40.0479	3	0	0	1	2	0	0
Q8R326	Paraspeckle component 1	Pspc1	Paraspeckle component 1 OS=Mus musculus OX=10090 GN=Pspc1 PE=1 SV=1	4		NaN	NaN	19.8052	19.3836	18.2127	18.8361	4	4	11.5	76.2375	4	0	0	2	2	0	0
Q6A0A9	Constitutive coactivator of PPAR-gamma-like protein 1	FAM120A	Constitutive coactivator of PPAR-gamma-like protein 1 OS=Mus musculus OX=10090 GN=FAM120A PE=1 SV=2	9		NaN	NaN	17.6348	17.7921	NaN	NaN	9	9	11.7	35.427	2	0	0	1	1	0	0
Q9ESX5	H/ACA ribonucleoprotein complex subunit 4	Dkc1	H/ACA ribonucleoprotein complex subunit DKC1 OS=Mus musculus OX=10090 GN=Dkc1 PE=1 SV=4	2		NaN	NaN	19.0243	18.9372	19.4946	NaN	2	2	5.9	57.4561	3	0	0	1	2	0	0
Q8VHN8;Q6P3D0	Protein syndesmos;U8 snoRNA-decapping enzyme	Nudt16l1;Nudt16	Tudor-interacting repair regulator protein OS=Mus musculus OX=10090 GN=Nudt16l1 PE=1 SV=2;U8 snoRNA-decapping enzyme OS=Mus musculus OX=10090 GN=Nudt16 PE=1 SV=1	2		NaN	NaN	22.0243	21.8653	22.5387	22.3389	2	2	9.5	88.7673	5	0	0	2	1	1	1
Q9CQL5	39S ribosomal protein L18, mitochondrial	Mrpl18	39S ribosomal protein L18, mitochondrial OS=Mus musculus OX=10090 GN=Mrpl18 PE=1 SV=1	2		NaN	NaN	19.7955	19.8046	NaN	NaN	2	2	11.7	39.6001	3	0	0	2	1	0	0
Q99N92	39S ribosomal protein L27, mitochondrial	Mrpl27	39S ribosomal protein L27, mitochondrial OS=Mus musculus OX=10090 GN=Mrpl27 PE=1 SV=1	3		NaN	NaN	20.0838	19.8297	NaN	NaN	3	3	24.3	39.9135	4	0	0	3	1	0	0
P70333	Heterogeneous nuclear ribonucleoprotein H2	Hnrnph2	Heterogeneous nuclear ribonucleoprotein H2 OS=Mus musculus OX=10090 GN=Hnrnph2 PE=1 SV=1	3		NaN	NaN	20.6824	20.72	17.0602	16.4645	8	3	24.7	74.9271	4	0	0	2	2	0	0
Q9CY73	39S ribosomal protein L44, mitochondrial	Mrpl44	39S ribosomal protein L44, mitochondrial OS=Mus musculus OX=10090 GN=Mrpl44 PE=1 SV=3	5		NaN	NaN	20.2129	20.5066	NaN	NaN	5	5	25.5	40.7195	10	0	0	5	5	0	0
Q8CFE4	SCY1-like protein 2	Scyl2	SCY1-like protein 2 OS=Mus musculus OX=10090 GN=Scyl2 PE=1 SV=1	3		NaN	NaN	17.9035	18.1713	19.7864	19.6309	3	3	4.4	75.4921	4	0	0	0	0	2	2
P28659	CUGBP Elav-like family member 1	Celf1	CUGBP Elav-like family member 1 OS=Mus musculus OX=10090 GN=Celf1 PE=1 SV=2	2		NaN	NaN	19.7051	19.4267	NaN	NaN	2	2	6.2	39.1319	4	0	0	2	2	0	0
Q8BK72	28S ribosomal protein S27, mitochondrial	Mrps27	28S ribosomal protein S27, mitochondrial OS=Mus musculus OX=10090 GN=Mrps27 PE=1 SV=2	5		NaN	NaN	20.893	20.0906	NaN	NaN	5	5	21.4	40.9836	7	0	0	4	3	0	0
Q8R035	Peptidyl-tRNA hydrolase ICT1, mitochondrial	Ict1	Peptidyl-tRNA hydrolase ICT1, mitochondrial OS=Mus musculus OX=10090 GN=Mrpl58 PE=1 SV=1	4		NaN	NaN	19.3623	19.3499	NaN	NaN	4	4	24.3	38.7122	4	0	0	3	1	0	0
P68254	14-3-3 protein theta	Ywhaq	14-3-3 protein theta OS=Mus musculus OX=10090 GN=Ywhaq PE=1 SV=1	2		18.959	19.3973	NaN	NaN	NaN	18.916	3	2	14.7	57.2723	2	0	2	0	0	0	0
Q9JIX8	Apoptotic chromatin condensation inducer in the nucleus	Acin1	Apoptotic chromatin condensation inducer in the nucleus OS=Mus musculus OX=10090 GN=Acin1 PE=1 SV=3	2		NaN	NaN	18.2724	17.2107	NaN	NaN	2	2	2.1	35.4831	2	0	0	1	1	0	0
Q9CPN8	Insulin-like growth factor 2 mRNA-binding protein 3	Igf2bp3	Insulin-like growth factor 2 mRNA-binding protein 3 OS=Mus musculus OX=10090 GN=Igf2bp3 PE=1 SV=1	2		NaN	NaN	18.8271	18.3872	NaN	NaN	3	1	6.4	37.2143	4	0	0	3	1	0	0
Q8VDM6	Heterogeneous nuclear ribonucleoprotein U-like protein 1	Hnrnpul1	Heterogeneous nuclear ribonucleoprotein U-like protein 1 OS=Mus musculus OX=10090 GN=Hnrnpul1 PE=1 SV=1	6		NaN	NaN	19.094	19.2841	NaN	NaN	6	6	8.4	38.3782	6	0	0	3	3	0	0
Q99N89	39S ribosomal protein L43, mitochondrial	Mrpl43	39S ribosomal protein L43, mitochondrial OS=Mus musculus OX=10090 GN=Mrpl43 PE=1 SV=1	5		NaN	NaN	21.5585	20.8956	NaN	NaN	5	5	29	42.454	8	0	0	4	4	0	0
Q9CPS7	RNA-binding protein PNO1	Pno1	RNA-binding protein PNO1 OS=Mus musculus OX=10090 GN=Pno1 PE=1 SV=1	3		NaN	NaN	19.2286	19.186	18.7021	18.7459	3	3	20.2	75.8626	5	0	0	3	2	0	0
Q91WM1	Spermatid perinuclear RNA-binding protein	Strbp	Spermatid perinuclear RNA-binding protein OS=Mus musculus OX=10090 GN=Strbp PE=1 SV=1	4		NaN	NaN	19.6981	19.4925	NaN	18.4594	8	4	11.9	57.65	6	0	0	4	2	0	0
Q62383	Transcription elongation factor SPT6	Supt6h	Transcription elongation factor SPT6 OS=Mus musculus OX=10090 GN=Supt6h PE=1 SV=2	2		NaN	NaN	18.2036	18.2225	NaN	18.4673	2	2	1.7	54.8934	3	0	0	2	1	0	0
Q9CQN7	39S ribosomal protein L41, mitochondrial	Mrpl41	39S ribosomal protein L41, mitochondrial OS=Mus musculus OX=10090 GN=Mrpl41 PE=1 SV=1	2		NaN	NaN	20.0076	19.7717	NaN	16.709	2	2	17.8	56.4883	3	0	0	2	1	0	0
Q99N94	39S ribosomal protein L9, mitochondrial	Mrpl9	39S ribosomal protein L9, mitochondrial OS=Mus musculus OX=10090 GN=Mrpl9 PE=1 SV=2	4		NaN	NaN	19.7568	18.4812	NaN	NaN	4	4	19.2	38.238	6	0	0	4	2	0	0
Q8BG81	Polymerase delta-interacting protein 3	Poldip3	Polymerase delta-interacting protein 3 OS=Mus musculus OX=10090 GN=Poldip3 PE=1 SV=1	2		NaN	NaN	17.3638	18.3302	NaN	18.1381	2	2	7.9	53.8321	1	0	0	1	0	0	0
Q8BU88	39S ribosomal protein L22, mitochondrial	Mrpl22	39S ribosomal protein L22, mitochondrial OS=Mus musculus OX=10090 GN=Mrpl22 PE=1 SV=1	3		NaN	NaN	19.1999	19.0538	NaN	NaN	3	3	20.4	38.2536	6	0	0	3	3	0	0
Q3UKJ7	WD40 repeat-containing protein SMU1;WD40 repeat-containing protein SMU1, N-terminally processed	Smu1	WD40 repeat-containing protein SMU1 OS=Mus musculus OX=10090 GN=Smu1 PE=2 SV=2	2		NaN	NaN	18.318	18.2935	18.3672	18.486	2	2	6	73.4647	0	0	0	0	0	0	0
Q8VE22	28S ribosomal protein S23, mitochondrial	Mrps23	28S ribosomal protein S23, mitochondrial OS=Mus musculus OX=10090 GN=Mrps23 PE=1 SV=1	4		NaN	NaN	19.9306	19.8455	NaN	NaN	4	4	29.9	39.7761	7	0	0	3	4	0	0
Q9DCI9	39S ribosomal protein L32, mitochondrial	Mrpl32	39S ribosomal protein L32, mitochondrial OS=Mus musculus OX=10090 GN=Mrpl32 PE=1 SV=1	2		NaN	NaN	19.3467	18.9517	NaN	NaN	2	2	16	38.2984	3	0	0	1	2	0	0
Q61687	Transcriptional regulator ATRX	Atrx	Transcriptional regulator ATRX OS=Mus musculus OX=10090 GN=Atrx PE=1 SV=3	5		18.6026	18.3545	NaN	NaN	17.3733	18.6546	5	5	2.9	72.985	0	0	0	0	0	0	0
Q9DCU6	39S ribosomal protein L4, mitochondrial	Mrpl4	39S ribosomal protein L4, mitochondrial OS=Mus musculus OX=10090 GN=Mrpl4 PE=1 SV=1	7		NaN	NaN	22.3759	19.8471	NaN	15.6806	7	7	30.6	57.9035	11	0	0	7	4	0	0
Q9D1P0	39S ribosomal protein L13, mitochondrial	Mrpl13	39S ribosomal protein L13, mitochondrial OS=Mus musculus OX=10090 GN=Mrpl13 PE=1 SV=1	3		NaN	NaN	19.6079	19.4041	NaN	NaN	3	3	24.2	39.0119	6	0	0	3	3	0	0
Q9D338	39S ribosomal protein L19, mitochondrial	Mrpl19	39S ribosomal protein L19, mitochondrial OS=Mus musculus OX=10090 GN=Mrpl19 PE=1 SV=1	4		NaN	NaN	18.7566	20.5611	NaN	16.2018	4	4	15.1	55.5195	5	0	0	1	4	0	0
Q99PU8	Putative ATP-dependent RNA helicase DHX30	Dhx30	ATP-dependent RNA helicase DHX30 OS=Mus musculus OX=10090 GN=Dhx30 PE=1 SV=1	3		NaN	NaN	18.4858	18.7567	NaN	NaN	3	3	4.2	37.2425	4	0	0	2	2	0	0
Q8BJZ4	28S ribosomal protein S35, mitochondrial	Mrps35	28S ribosomal protein S35, mitochondrial OS=Mus musculus OX=10090 GN=Mrps35 PE=1 SV=2	2		NaN	NaN	19.695	18.2787	NaN	NaN	2	2	8.1	37.9737	2	0	0	2	0	0	0
Q99N87	28S ribosomal protein S5, mitochondrial	Mrps5	28S ribosomal protein S5, mitochondrial OS=Mus musculus OX=10090 GN=Mrps5 PE=1 SV=1	4		NaN	NaN	19.0825	20.3167	NaN	NaN	4	4	11.3	39.3992	6	0	0	2	4	0	0
Q80ZS3	28S ribosomal protein S26, mitochondrial	Mrps26	28S ribosomal protein S26, mitochondrial OS=Mus musculus OX=10090 GN=Mrps26 PE=1 SV=1	2		NaN	NaN	19.9405	18.4767	NaN	NaN	2	2	11.5	38.4172	1	0	0	1	0	0	0
Q6NZF1	Zinc finger CCCH domain-containing protein 11A	Zc3h11a	Zinc finger CCCH domain-containing protein 11A OS=Mus musculus OX=10090 GN=Zc3h11a PE=1 SV=1	2		NaN	NaN	17.6533	18.4619	NaN	NaN	2	2	4.3	36.1152	2	0	0	1	1	0	0
Q14C51	Pentatricopeptide repeat domain-containing protein 3, mitochondrial	Ptcd3	Pentatricopeptide repeat domain-containing protein 3, mitochondrial OS=Mus musculus OX=10090 GN=Ptcd3 PE=1 SV=2	5		NaN	NaN	19.6659	18.9818	NaN	NaN	5	5	8.8	38.6478	6	0	0	3	3	0	0
Q9D1B9	39S ribosomal protein L28, mitochondrial	Mrpl28	39S ribosomal protein L28, mitochondrial OS=Mus musculus OX=10090 GN=Mrpl28 PE=1 SV=3	4		NaN	NaN	19.8242	19.7584	15.4847	NaN	4	4	20.2	55.0673	6	0	0	3	3	0	0
Q8BHN5	RNA-binding protein 45	Rbm45	RNA-binding protein 45 OS=Mus musculus OX=10090 GN=Rbm45 PE=1 SV=1	2		NaN	NaN	18.7508	18.9478	NaN	16.8008	2	2	5.5	54.4994	3	0	0	1	2	0	0
Q9EPL8	Importin-7	Ipo7	Importin-7 OS=Mus musculus OX=10090 GN=Ipo7 PE=1 SV=2	2		NaN	NaN	17.4318	17.206	18.516	18.1978	2	2	2.6	71.3516	1	0	0	0	0	1	0
Q9CZU4	GTPase Era, mitochondrial	Eral1	GTPase Era, mitochondrial OS=Mus musculus OX=10090 GN=Eral1 PE=2 SV=1	2		NaN	NaN	18.4227	17.582	NaN	NaN	2	2	5.5	36.0047	3	0	0	2	1	0	0
Q924T2	28S ribosomal protein S2, mitochondrial	Mrps2	28S ribosomal protein S2, mitochondrial OS=Mus musculus OX=10090 GN=Mrps2 PE=1 SV=1	3		NaN	NaN	19.1644	19.4548	NaN	NaN	3	3	17.2	38.6192	6	0	0	3	3	0	0
Q6ZQ58	La-related protein 1	Larp1	La-related protein 1 OS=Mus musculus OX=10090 GN=Larp1 PE=1 SV=3	2		NaN	NaN	18.2319	17.5831	17.1361	NaN	2	2	2.8	52.9512	2	0	0	1	1	0	0
Q9Z0W3	Nuclear pore complex protein Nup160	Nup160	Nuclear pore complex protein Nup160 OS=Mus musculus OX=10090 GN=Nup160 PE=1 SV=2	2		NaN	NaN	17.9868	17.9066	17.6306	17.878	2	2	1.6	71.402	2	0	0	2	0	0	0
Q9JIK9	28S ribosomal protein S34, mitochondrial	Mrps34	28S ribosomal protein S34, mitochondrial OS=Mus musculus OX=10090 GN=Mrps34 PE=1 SV=1	5		NaN	NaN	19.8902	19.396	NaN	NaN	5	5	34.4	39.2862	10	0	0	6	4	0	0
Q80X85	28S ribosomal protein S7, mitochondrial	Mrps7	28S ribosomal protein S7, mitochondrial OS=Mus musculus OX=10090 GN=Mrps7 PE=1 SV=1	3		NaN	NaN	19.8734	19.9597	NaN	NaN	3	3	18.2	39.8331	5	0	0	3	2	0	0
Q9Z1N2	Origin recognition complex subunit 1	Orc1	Origin recognition complex subunit 1 OS=Mus musculus OX=10090 GN=Orc1 PE=1 SV=2	2		NaN	NaN	17.1612	17.3108	18.3305	18.2435	2	2	3.2	71.046	5	0	0	1	1	2	1
Q8BKS9	Pumilio domain-containing protein KIAA0020	Kiaa0020	Pumilio homolog 3 OS=Mus musculus OX=10090 GN=Pum3 PE=1 SV=2	3		NaN	NaN	16.9844	17.6666	16.4582	16.795	3	3	7.4	67.9043	3	0	0	0	3	0	0
Q9D7N3	28S ribosomal protein S9, mitochondrial	Mrps9	28S ribosomal protein S9, mitochondrial OS=Mus musculus OX=10090 GN=Mrps9 PE=1 SV=3	7		NaN	NaN	20.216	19.8776	NaN	NaN	7	7	24.9	40.0935	10	0	0	6	4	0	0
Q3UMQ8	H/ACA ribonucleoprotein complex non-core subunit NAF1	Naf1	H/ACA ribonucleoprotein complex non-core subunit NAF1 OS=Mus musculus OX=10090 GN=Naf1 PE=1 SV=2	2		NaN	NaN	NaN	15.5793	NaN	16.4898	2	2	4.9	32.0691	0	0	0	0	0	0	0
O35972	39S ribosomal protein L23, mitochondrial	Mrpl23	39S ribosomal protein L23, mitochondrial OS=Mus musculus OX=10090 GN=Mrpl23 PE=1 SV=1	3		NaN	NaN	19.2108	19.9708	NaN	NaN	3	3	29.5	39.1817	9	0	0	4	5	0	0
Q64012	RNA-binding protein Raly	Raly	RNA-binding protein Raly OS=Mus musculus OX=10090 GN=Raly PE=1 SV=3	13		15.4286	16.6239	24.1407	23.8551	16.8015	16.8471	13	13	40.1	113.697	23	0	0	11	12	0	0
Q8VEK3	Heterogeneous nuclear ribonucleoprotein U	Hnrnpu	Heterogeneous nuclear ribonucleoprotein U OS=Mus musculus OX=10090 GN=Hnrnpu PE=1 SV=1	27		21.1233	21.1264	28.598	28.5261	29.0925	29.2414	27	27	31	157.708	326	0	2	95	97	69	63
Q9Z130	Heterogeneous nuclear ribonucleoprotein D-like	Hnrnpdl	Heterogeneous nuclear ribonucleoprotein D-like OS=Mus musculus OX=10090 GN=Hnrnpdl PE=1 SV=1	10		18.8081	17.727	24.4035	24.5538	18.1147	17.9673	10	9	27.6	121.574	16	0	0	7	9	0	0
Q8K2M0	39S ribosomal protein L38, mitochondrial	Mrpl38	39S ribosomal protein L38, mitochondrial OS=Mus musculus OX=10090 GN=Mrpl38 PE=1 SV=2	5		14.4303	NaN	20.019	20.7048	NaN	NaN	5	5	25	55.1542	10	0	0	5	5	0	0
Q9CXY6	Interleukin enhancer-binding factor 2	Ilf2	Interleukin enhancer-binding factor 2 OS=Mus musculus OX=10090 GN=Ilf2 PE=1 SV=1	15		17.0442	18.6468	23.5443	23.5616	17.1525	17.7494	15	15	51.5	117.699	40	0	0	18	22	0	0
Q8C854	Myelin expression factor 2	Myef2	Myelin expression factor 2 OS=Mus musculus OX=10090 GN=Myef2 PE=1 SV=1	19		17.565	17.5483	23.3506	23.0934	17.7767	18.2422	19	19	41.6	117.576	37	0	0	16	21	0	0
O88569	Heterogeneous nuclear ribonucleoproteins A2/B1	Hnrnpa2b1	Heterogeneous nuclear ribonucleoproteins A2/B1 OS=Mus musculus OX=10090 GN=Hnrnpa2b1 PE=1 SV=2	20		20.4307	20.5313	26.0276	26.0335	20.7803	20.8109	20	19	61.5	134.614	90	2	2	40	40	2	4
Q9CR59	Growth arrest and DNA damage-inducible proteins-interacting protein 1	Gadd45gip1	Growth arrest and DNA damage-inducible proteins-interacting protein 1 OS=Mus musculus OX=10090 GN=Gadd45gip1 PE=1 SV=1	2		NaN	14.8812	20.5656	20.274	NaN	NaN	2	2	8.6	55.7208	4	0	0	2	2	0	0
Q91WJ8	Far upstream element-binding protein 1	Fubp1	Far upstream element-binding protein 1 OS=Mus musculus OX=10090 GN=Fubp1 PE=1 SV=1	12		18.7736	18.2612	23.6922	23.9063	18.7136	18.5429	13	12	29.3	121.89	20	0	0	9	11	0	0
Q60668	Heterogeneous nuclear ribonucleoprotein D0	Hnrnpd	Heterogeneous nuclear ribonucleoprotein D0 OS=Mus musculus OX=10090 GN=Hnrnpd PE=1 SV=2	7		20.7741	20.9308	25.9529	25.8631	21.1456	21.5956	8	7	19.4	136.262	21	1	1	10	9	0	0
P49312	Heterogeneous nuclear ribonucleoprotein A1;Heterogeneous nuclear ribonucleoprotein A1, N-terminally processed	Hnrnpa1	Heterogeneous nuclear ribonucleoprotein A1 OS=Mus musculus OX=10090 GN=Hnrnpa1 PE=1 SV=2	15		22.1939	22.2812	27.3777	27.2018	22.7925	22.3235	16	14	58.1	144.171	80	2	5	33	29	6	5
Q8BG05	Heterogeneous nuclear ribonucleoprotein A3	Hnrnpa3	Heterogeneous nuclear ribonucleoprotein A3 OS=Mus musculus OX=10090 GN=Hnrnpa3 PE=1 SV=1	14		21.3088	21.6244	26.4923	26.4139	21.5374	21.8044	15	14	34.3	139.181	93	3	5	39	34	7	5
Q7TMK9	Heterogeneous nuclear ribonucleoprotein Q	Syncrip	Heterogeneous nuclear ribonucleoprotein Q OS=Mus musculus OX=10090 GN=Syncrip PE=1 SV=2	21		19.401	19.2578	24.2962	24.2817	20.0687	20.4535	21	21	40.4	127.759	59	0	0	28	29	1	1
Q8R081	Heterogeneous nuclear ribonucleoprotein L	Hnrnpl	Heterogeneous nuclear ribonucleoprotein L OS=Mus musculus OX=10090 GN=Hnrnpl PE=1 SV=2	18		20.4429	20.9381	25.5598	25.5229	19.4279	21.1599	18	18	38.1	133.052	63	0	2	28	28	1	4
Q9Z204	Heterogeneous nuclear ribonucleoproteins C1/C2	Hnrnpc	Heterogeneous nuclear ribonucleoproteins C1/C2 OS=Mus musculus OX=10090 GN=Hnrnpc PE=1 SV=1	18		21.4992	21.4941	26.2982	26.2428	21.6145	21.8353	18	18	50.8	138.984	66	1	1	29	29	2	4
O88532	Zinc finger RNA-binding protein	Zfr	Zinc finger RNA-binding protein OS=Mus musculus OX=10090 GN=Zfr PE=1 SV=2	12		16.2189	16.9874	21.5225	21.1637	NaN	16.1944	12	12	17.1	92.087	16	0	0	8	8	0	0
Q00PI9	Heterogeneous nuclear ribonucleoprotein U-like protein 2	Hnrnpul2	Heterogeneous nuclear ribonucleoprotein U-like protein 2 OS=Mus musculus OX=10090 GN=Hnrnpul2 PE=1 SV=2	13		18.5331	16.7521	22.1251	22.5256	16.0866	17.496	13	13	23	113.518	23	0	0	11	12	0	0
Q3U0V1	Far upstream element-binding protein 2	Khsrp	Far upstream element-binding protein 2 OS=Mus musculus OX=10090 GN=Khsrp PE=1 SV=2	16		17.1573	18.3046	22.4395	22.2132	17.9952	18.1437	16	15	29.9	116.253	30	0	0	15	14	1	0
Q9ER88	28S ribosomal protein S29, mitochondrial	Dap3	28S ribosomal protein S29, mitochondrial OS=Mus musculus OX=10090 GN=Dap3 PE=1 SV=1	7		16.7787	NaN	20.581	21.956	16.7935	NaN	7	7	24.6	76.1092	12	0	0	4	8	0	0
Q99020	Heterogeneous nuclear ribonucleoprotein A/B	Hnrnpab	Heterogeneous nuclear ribonucleoprotein A/B OS=Mus musculus OX=10090 GN=Hnrnpab PE=1 SV=1	9		21.534	21.3384	25.9037	25.7762	22.018	22.2351	9	9	27	138.805	37	2	2	13	10	5	5
P70372	ELAV-like protein 1	Elavl1	ELAV-like protein 1 OS=Mus musculus OX=10090 GN=Elavl1 PE=1 SV=2	10		18.8072	19.8341	23.7655	23.6275	18.6964	18.9358	10	10	41.1	123.666	21	0	1	9	10	0	1
P61979	Heterogeneous nuclear ribonucleoprotein K	Hnrnpk	Heterogeneous nuclear ribonucleoprotein K OS=Mus musculus OX=10090 GN=Hnrnpk PE=1 SV=1	25		21.8077	21.9088	26.326	26.1037	22.3972	22.4472	25	25	52.5	140.991	105	3	2	44	41	7	8
Q9Z1X4	Interleukin enhancer-binding factor 3	Ilf3	Interleukin enhancer-binding factor 3 OS=Mus musculus OX=10090 GN=Ilf3 PE=1 SV=2	22		18.5622	18.3916	22.7725	22.7422	16.6643	18.8328	22	18	30.3	117.966	51	0	0	23	26	0	2
Q8C2Q3	RNA-binding protein 14	Rbm14	RNA-binding protein 14 OS=Mus musculus OX=10090 GN=Rbm14 PE=1 SV=1	15		17.3472	17.7306	21.8491	21.4201	17.3916	17.7818	15	15	28.8	113.521	26	0	0	15	11	0	0
Q6PB66	Leucine-rich PPR motif-containing protein, mitochondrial	Lrpprc	Leucine-rich PPR motif-containing protein, mitochondrial OS=Mus musculus OX=10090 GN=Lrpprc PE=1 SV=2	20		NaN	16.1453	20.4517	20.0286	NaN	16.0005	20	20	19.2	72.6261	15	0	0	10	5	0	0
Q9CXW2	28S ribosomal protein S22, mitochondrial	Mrps22	28S ribosomal protein S22, mitochondrial OS=Mus musculus OX=10090 GN=Mrps22 PE=1 SV=1	8		16.7549	NaN	20.7086	20.8047	NaN	16.8389	8	8	29.5	75.107	9	0	0	4	5	0	0
P84104	Serine/arginine-rich splicing factor 3	Srsf3	Serine/arginine-rich splicing factor 3 OS=Mus musculus OX=10090 GN=Srsf3 PE=1 SV=1	5		19.769	17.8083	22.5948	22.9492	19.9546	20.1814	5	4	31.7	123.257	8	0	0	3	5	0	0
O35737	Heterogeneous nuclear ribonucleoprotein H;Heterogeneous nuclear ribonucleoprotein H, N-terminally processed	Hnrnph1	Heterogeneous nuclear ribonucleoprotein H OS=Mus musculus OX=10090 GN=Hnrnph1 PE=1 SV=3	15		21.3523	20.7222	25.0284	24.9739	21.115	21.2413	15	9	46.1	134.433	61	2	2	22	25	5	5
Q9DBR0	A-kinase anchor protein 8	Akap8	A-kinase anchor protein 8 OS=Mus musculus OX=10090 GN=Akap8 PE=1 SV=1	5		NaN	16.665	20.5901	20.4826	NaN	17.0778	5	5	11.1	74.8154	8	0	0	4	4	0	0
Q91VM5;Q9WV02	RNA binding motif protein, X-linked-like-1;RNA-binding motif protein, X chromosome;RNA-binding motif protein, X chromosome, N-terminally processed	Rbmxl1;Rbmx	RNA binding motif protein, X-linked-like-1 OS=Mus musculus OX=10090 GN=Rbmxl1 PE=2 SV=1;RNA-binding motif protein, X chromosome OS=Mus musculus OX=10090 GN=Rbmx PE=1 SV=1	14		19.3308	20.5667	23.7859	23.7915	20.1093	19.7422	14	14	36.6	127.326	27	0	2	11	13	1	0
Q9JII5	DAZ-associated protein 1	Dazap1	DAZ-associated protein 1 OS=Mus musculus OX=10090 GN=Dazap1 PE=1 SV=2	4		NaN	17.7636	21.6889	21.503	17.3662	17.5581	4	4	17	95.8797	5	0	0	3	2	0	0
Q8VC52	RNA-binding protein with multiple splicing 2	Rbpms2	RNA-binding protein with multiple splicing 2 OS=Mus musculus OX=10090 GN=Rbpms2 PE=1 SV=1	6		NaN	17.0145	20.3785	21.1071	17.3325	18.0342	6	4	35.9	93.8668	4	0	0	1	3	0	0
O70133	ATP-dependent RNA helicase A	Dhx9	ATP-dependent RNA helicase A OS=Mus musculus OX=10090 GN=Dhx9 PE=1 SV=2	41		20.4392	20.6613	24.309	24.2371	20.4133	20.5931	41	41	37.2	130.653	102	2	0	46	46	5	3
Q60749	KH domain-containing, RNA-binding, signal transduction-associated protein 1	Khdrbs1	KH domain-containing, RNA-binding, signal transduction-associated protein 1 OS=Mus musculus OX=10090 GN=Khdrbs1 PE=1 SV=2	4		18.8468	18.8189	22.599	22.3978	19.5727	19.3379	4	4	19	121.573	9	0	0	5	3	1	0
Q9R0L7	A-kinase anchor protein 8-like	Akap8l	A-kinase anchor protein 8-like OS=Mus musculus OX=10090 GN=Akap8l PE=1 SV=1	2		17.1872	16.6269	20.5043	20.5675	NaN	NaN	2	2	4	74.8858	3	0	0	2	1	0	0
Q9CX86	Heterogeneous nuclear ribonucleoprotein A0	Hnrnpa0	Heterogeneous nuclear ribonucleoprotein A0 OS=Mus musculus OX=10090 GN=Hnrnpa0 PE=1 SV=1	5		21.0387	21.315	24.7145	24.5567	20.6843	21.5578	5	5	21.6	133.867	24	0	3	8	9	2	2
Q9Z2X1	Heterogeneous nuclear ribonucleoprotein F;Heterogeneous nuclear ribonucleoprotein F, N-terminally processed	Hnrnpf	Heterogeneous nuclear ribonucleoprotein F OS=Mus musculus OX=10090 GN=Hnrnpf PE=1 SV=3	10		22.2471	21.8005	25.4628	25.4274	21.9062	21.9885	12	10	46	138.832	41	3	2	13	16	3	4
Q921F2	TAR DNA-binding protein 43	Tardbp	TAR DNA-binding protein 43 OS=Mus musculus OX=10090 GN=Tardbp PE=1 SV=1	10		20.0841	20.2609	23.3975	23.3048	20.5354	20.5201	10	10	29.2	128.103	28	0	0	10	12	2	4
Q501J6	Probable ATP-dependent RNA helicase DDX17	Ddx17	Probable ATP-dependent RNA helicase DDX17 OS=Mus musculus OX=10090 GN=Ddx17 PE=1 SV=1	13		19.2076	18.8584	22.1577	21.9969	18.7925	19.5296	17	13	31.4	120.543	31	0	0	14	15	0	2
Q8K310	Matrin-3	Matr3	Matrin-3 OS=Mus musculus OX=10090 GN=Matr3 PE=1 SV=1	26		20.2462	19.9694	23.09	23.0651	19.5587	20.0701	26	26	43.3	126	54	0	1	27	23	2	1
Q9R0U0	Serine/arginine-rich splicing factor 10	Srsf10	Serine/arginine-rich splicing factor 10 OS=Mus musculus OX=10090 GN=Srsf10 PE=1 SV=2	6		17.456	18.2713	20.6596	20.8032	17.8253	18.1584	6	6	23.7	113.174	11	0	0	4	6	1	0
Q61656	Probable ATP-dependent RNA helicase DDX5	Ddx5	Probable ATP-dependent RNA helicase DDX5 OS=Mus musculus OX=10090 GN=Ddx5 PE=1 SV=2	27		21.8838	22.0178	24.796	24.7471	21.9394	22.0874	27	23	46.1	137.472	86	3	6	32	31	7	7
Q9JIF0	Protein arginine N-methyltransferase 1	Prmt1	Protein arginine N-methyltransferase 1 OS=Mus musculus OX=10090 GN=Prmt1 PE=1 SV=1	16		20.9289	20.7397	23.6712	23.4922	20.8627	20.8769	16	16	41	130.572	40	1	0	18	15	4	2
Q9EP97	Sentrin-specific protease 3	Senp3	Sentrin-specific protease 3 OS=Mus musculus OX=10090 GN=Senp3 PE=1 SV=1	2		21.5296	25.9326	29.8961	22.7637	26.1729	NaN	2	2	4.6	126.295	1	0	0	1	0	0	0
D3YXK2	Scaffold attachment factor B1	Safb	Scaffold attachment factor B1 OS=Mus musculus OX=10090 GN=Safb PE=1 SV=2	23		15.4378	NaN	18.0059	18.0329	14.2435	13.937	23	23	21.9	79.6572	4	0	0	1	3	0	0
P32067	Lupus La protein homolog	Ssb	Lupus La protein homolog OS=Mus musculus OX=10090 GN=Ssb PE=1 SV=1	13		20.2939	21.1435	23.4303	23.1258	21.2087	21.6544	13	13	32	130.857	26	0	0	14	8	1	3
P70318	Nucleolysin TIAR	Tial1	Nucleolysin TIAR OS=Mus musculus OX=10090 GN=Tial1 PE=1 SV=1	2		16.7469	17.5407	19.6074	19.6752	NaN	17.0425	2	2	7.4	90.6127	5	0	0	3	2	0	0
P56959	RNA-binding protein FUS	Fus	RNA-binding protein FUS OS=Mus musculus OX=10090 GN=Fus PE=1 SV=1	8		21.3689	20.6788	23.633	23.3111	20.9131	20.4586	8	8	18.1	130.363	20	1	0	8	9	1	1
P83882	60S ribosomal protein L36a	Rpl36a	60S ribosomal protein L36a OS=Mus musculus OX=10090 GN=Rpl36a PE=3 SV=2	2		19.7639	18.9523	21.6373	21.8171	20.4333	20.5207	2	2	15.1	123.125	4	0	0	2	2	0	0
P62751	60S ribosomal protein L23a	Rpl23a	60S ribosomal protein L23a OS=Mus musculus OX=10090 GN=Rpl23a PE=1 SV=1	3		19.5965	18.9474	21.587	21.5621	21.4339	21.1927	3	3	25	124.32	5	0	0	1	1	2	1
Q8CCS6	Polyadenylate-binding protein 2	Pabpn1	Polyadenylate-binding protein 2 OS=Mus musculus OX=10090 GN=Pabpn1 PE=1 SV=3	5		NaN	18.519	20.9111	20.4994	NaN	NaN	5	5	29.8	59.9295	6	0	0	3	3	0	0
Q9EQI8	39S ribosomal protein L46, mitochondrial	Mrpl46	39S ribosomal protein L46, mitochondrial OS=Mus musculus OX=10090 GN=Mrpl46 PE=1 SV=1	3		17.2056	NaN	19.1429	19.4291	NaN	NaN	3	3	15.5	55.7776	5	0	0	2	3	0	0
P62267	40S ribosomal protein S23	Rps23	40S ribosomal protein S23 OS=Mus musculus OX=10090 GN=Rps23 PE=1 SV=3	5		20.8503	21.7518	23.3731	23.2836	22.4507	22.6398	5	5	29.4	134.349	23	1	3	7	4	4	4
Q62093	Serine/arginine-rich splicing factor 2	Srsf2	Serine/arginine-rich splicing factor 2 OS=Mus musculus OX=10090 GN=Srsf2 PE=1 SV=4	3		19.6227	19.337	21.5405	21.4454	19.068	19.7128	3	3	18.6	120.726	7	0	0	3	4	0	0
Q9D0D4	Probable dimethyladenosine transferase	Dimt1	Probable dimethyladenosine transferase OS=Mus musculus OX=10090 GN=Dimt1 PE=2 SV=1	5		17.9717	18.2253	20.1624	19.9617	18.1014	18.3578	5	5	18.2	112.78	7	0	0	4	3	0	0
Q9D0E1	Heterogeneous nuclear ribonucleoprotein M	Hnrnpm	Heterogeneous nuclear ribonucleoprotein M OS=Mus musculus OX=10090 GN=Hnrnpm PE=1 SV=3	29		26.2382	26.1289	28.0875	28.1258	25.5338	25.7821	29	29	48	159.896	71	2	3	28	28	5	5
Q9DBR1	5-3 exoribonuclease 2	Xrn2	5-3 exoribonuclease 2 OS=Mus musculus OX=10090 GN=Xrn2 PE=1 SV=1	9		17.7784	18.2885	20.4436	19.4606	16.4166	16.3449	9	9	14.5	108.733	9	0	0	5	4	0	0
Q9D0L8	mRNA cap guanine-N7 methyltransferase	Rnmt	mRNA cap guanine-N7 methyltransferase OS=Mus musculus OX=10090 GN=Rnmt PE=1 SV=1	4		NaN	18.0797	19.8663	20.0401	NaN	18.1571	4	4	13.3	76.1432	6	0	0	3	3	0	0
P17225	Polypyrimidine tract-binding protein 1	Ptbp1	Polypyrimidine tract-binding protein 1 OS=Mus musculus OX=10090 GN=Ptbp1 PE=1 SV=2	15		22.3305	21.8843	24.0517	23.8894	21.5361	21.7309	15	13	53.1	135.423	49	2	0	22	19	3	3
Q9CW46	Ribonucleoprotein PTB-binding 1	Raver1	Ribonucleoprotein PTB-binding 1 OS=Mus musculus OX=10090 GN=Raver1 PE=1 SV=2	2		17.5893	17.6841	19.6332	19.3494	18.0517	17.4032	2	2	4.3	109.711	3	0	0	2	1	0	0
P62852	40S ribosomal protein S25	Rps25	40S ribosomal protein S25 OS=Mus musculus OX=10090 GN=Rps25 PE=1 SV=1	3		19.6926	19.8112	21.6762	21.4164	20.0057	21.2088	3	3	16	123.811	8	0	0	3	3	1	1
Q64213	Splicing factor 1	Sf1	Splicing factor 1 OS=Mus musculus OX=10090 GN=Sf1 PE=1 SV=6	7		17.9524	18.7702	20.2031	20.1011	NaN	17.8231	7	7	15.2	94.8499	9	0	0	5	4	0	0
P97351	40S ribosomal protein S3a	Rps3a	40S ribosomal protein S3a OS=Mus musculus OX=10090 GN=Rps3a PE=1 SV=3	8		20.3328	20.2859	22.0107	22.1715	21.8855	21.5342	8	8	30.7	128.221	22	0	0	8	7	3	4
P62754	40S ribosomal protein S6	Rps6	40S ribosomal protein S6 OS=Mus musculus OX=10090 GN=Rps6 PE=1 SV=1	3		21.2854	20.9645	22.8878	22.7163	22.0704	22.1585	3	3	14.1	132.083	13	1	0	4	4	2	2
Q99K48	Non-POU domain-containing octamer-binding protein	Nono	Non-POU domain-containing octamer-binding protein OS=Mus musculus OX=10090 GN=Nono PE=1 SV=3	11		20.8974	21.375	22.874	22.6956	20.8327	20.893	12	11	35.3	129.568	28	0	2	13	10	1	2
P62849	40S ribosomal protein S24	Rps24	40S ribosomal protein S24 OS=Mus musculus OX=10090 GN=Rps24 PE=1 SV=1	4		20.547	20.0628	21.9326	21.784	20.9264	21.1202	4	4	35.3	126.373	16	1	1	4	4	3	3
Q8BL97	Serine/arginine-rich splicing factor 7	Srsf7	Serine/arginine-rich splicing factor 7 OS=Mus musculus OX=10090 GN=Srsf7 PE=1 SV=1	4		20.1895	20.271	21.7897	21.7346	19.9597	19.7005	5	4	17.2	123.645	7	0	0	2	3	1	1
Q8VIJ6	Splicing factor, proline- and glutamine-rich	Sfpq	Splicing factor, proline- and glutamine-rich OS=Mus musculus OX=10090 GN=Sfpq PE=1 SV=1	15		21.7343	21.937	23.3164	23.3403	20.8784	20.9627	15	14	27	132.169	49	3	3	15	19	4	5
P09405	Nucleolin	Ncl	Nucleolin OS=Mus musculus OX=10090 GN=Ncl PE=1 SV=2	21		21.806	22.044	23.4929	23.3185	22.3626	22.5817	21	21	28.7	135.606	70	5	5	16	20	13	11
Q9JKF7	39S ribosomal protein L39, mitochondrial	Mrpl39	39S ribosomal protein L39, mitochondrial OS=Mus musculus OX=10090 GN=Mrpl39 PE=1 SV=4	4		NaN	17.9972	19.1395	19.7401	16.2934	NaN	4	4	14.6	73.1702	5	0	0	2	3	0	0
Q9WVB0	RNA-binding protein with multiple splicing	Rbpms	RNA-binding protein with multiple splicing OS=Mus musculus OX=10090 GN=Rbpms PE=1 SV=2	3		18.5775	17.6945	20.161	18.9899	NaN	17.915	5	3	34.5	93.3379	2	0	0	2	0	0	0
P62242	40S ribosomal protein S8	Rps8	40S ribosomal protein S8 OS=Mus musculus OX=10090 GN=Rps8 PE=1 SV=2	6		21.2828	21.3272	22.7871	22.6855	21.9772	22.0685	6	6	34.6	132.128	28	2	3	8	7	4	4
P26369	Splicing factor U2AF 65 kDa subunit	U2af2	Splicing factor U2AF 65 kDa subunit OS=Mus musculus OX=10090 GN=U2af2 PE=1 SV=3	6		19.8302	19.9409	21.2636	21.3347	19.4539	19.1409	6	6	26.5	120.964	12	0	1	6	5	0	0
P47911	60S ribosomal protein L6	Rpl6	60S ribosomal protein L6 OS=Mus musculus OX=10090 GN=Rpl6 PE=1 SV=3	8		19.6185	20.4954	21.4269	21.4637	21.4884	21.3635	8	8	26.7	125.856	28	0	1	8	11	4	4
P62830	60S ribosomal protein L23	Rpl23	60S ribosomal protein L23 OS=Mus musculus OX=10090 GN=Rpl23 PE=1 SV=1	3		20.8694	22.3474	23.1029	22.7686	23.0739	23.5868	3	3	23.6	135.749	13	0	0	3	4	3	3
O35326	Serine/arginine-rich splicing factor 5	Srsf5	Serine/arginine-rich splicing factor 5 OS=Mus musculus OX=10090 GN=Srsf5 PE=1 SV=2	4		NaN	18.8368	19.9999	20.2684	18.1008	18.8073	4	4	19.3	96.0131	6	0	0	2	4	0	0
Q9EPU0	Regulator of nonsense transcripts 1	Upf1	Regulator of nonsense transcripts 1 OS=Mus musculus OX=10090 GN=Upf1 PE=1 SV=2	18		18.7157	19.188	20.3188	20.1708	18.5665	18.5402	18	18	20	115.5	19	0	0	9	10	0	0
Q3UEB3	Poly(U)-binding-splicing factor PUF60	Puf60	Poly(U)-binding-splicing factor PUF60 OS=Mus musculus OX=10090 GN=Puf60 PE=1 SV=2	3		18.5172	18.2751	19.5971	19.7102	18.4156	17.8931	3	3	7.8	112.408	4	0	0	2	2	0	0
Q9D883	Splicing factor U2AF 35 kDa subunit	U2af1	Splicing factor U2AF 35 kDa subunit OS=Mus musculus OX=10090 GN=U2af1 PE=1 SV=4	3		20.2733	20.2951	21.2265	21.8232	20.5663	21.3745	3	3	18	125.559	9	1	1	2	2	1	2
Q8CI11	Guanine nucleotide-binding protein-like 3	Gnl3	Guanine nucleotide-binding protein-like 3 OS=Mus musculus OX=10090 GN=Gnl3 PE=1 SV=2	5		18.9167	18.1954	19.6787	19.8973	19.5535	20.0118	5	5	12.3	116.253	9	0	1	4	2	0	2
P62301	40S ribosomal protein S13	Rps13	40S ribosomal protein S13 OS=Mus musculus OX=10090 GN=Rps13 PE=1 SV=2	4		20.3809	20.3416	21.5067	21.6398	20.6026	20.849	4	4	25.2	125.321	12	1	0	4	4	2	1
Q9Z1D1	Eukaryotic translation initiation factor 3 subunit G	Eif3g	Eukaryotic translation initiation factor 3 subunit G OS=Mus musculus OX=10090 GN=Eif3g PE=1 SV=2	4		17.7539	20.4778	20.4046	20.2181	20.9305	21.1898	4	4	16.9	120.975	8	0	1	3	3	0	1
P62996	Transformer-2 protein homolog beta	Tra2b	Transformer-2 protein homolog beta OS=Mus musculus OX=10090 GN=Tra2b PE=1 SV=1	4		20.429	19.8862	21.523	21.1817	19.8239	19.9525	4	4	17.4	122.796	9	1	1	3	3	0	1
P62264	40S ribosomal protein S14	Rps14	40S ribosomal protein S14 OS=Mus musculus OX=10090 GN=Rps14 PE=1 SV=3	6		22.0912	22.3038	23.3961	23.3602	23.0271	23.2524	6	6	37.7	137.431	25	3	4	7	5	4	2
Q9DC71	28S ribosomal protein S15, mitochondrial	Mrps15	28S ribosomal protein S15, mitochondrial OS=Mus musculus OX=10090 GN=Mrps15 PE=1 SV=2	2		NaN	17.0187	17.7273	18.6474	NaN	NaN	2	2	8.1	53.3934	3	0	0	1	2	0	0
Q99ME9	Nucleolar GTP-binding protein 1	Gtpbp4	Nucleolar GTP-binding protein 1 OS=Mus musculus OX=10090 GN=Gtpbp4 PE=1 SV=3	5		NaN	19.1294	20.2818	20.2575	18.8586	18.785	5	5	9.8	97.3123	11	0	0	6	5	0	0
P43274	Histone H1.4	Hist1h1e	Histone H1.4 OS=Mus musculus OX=10090 GN=H1-4 PE=1 SV=2	2		18.9127	NaN	20.1289	19.9173	20.823	21.2004	5	2	25.1	100.982	3	0	0	0	1	1	1
Q9CPX7	28S ribosomal protein S16, mitochondrial	Mrps16	28S ribosomal protein S16, mitochondrial OS=Mus musculus OX=10090 GN=Mrps16 PE=1 SV=1	2		18.9316	NaN	20.0691	19.9978	NaN	NaN	2	2	19.3	58.9985	3	0	0	1	2	0	0
P35550	rRNA 2-O-methyltransferase fibrillarin	Fbl	rRNA 2-O-methyltransferase fibrillarin OS=Mus musculus OX=10090 GN=Fbl PE=1 SV=2	8		21.9254	21.762	22.955	22.9353	22.0315	22.2391	8	8	29.7	133.848	32	2	4	6	7	6	7
P12970	60S ribosomal protein L7a	Rpl7a	60S ribosomal protein L7a OS=Mus musculus OX=10090 GN=Rpl7a PE=1 SV=2	8		21.0274	21.2088	22.1973	22.2126	22.0165	21.9661	8	8	26.3	130.629	21	1	1	7	8	2	2
Q3TWW8	Serine/arginine-rich splicing factor 6	Srsf6	Serine/arginine-rich splicing factor 6 OS=Mus musculus OX=10090 GN=Srsf6 PE=1 SV=1	4		20.4724	19.6301	20.7466	21.5063	19.2552	19.6767	4	3	13.6	121.287	4	0	0	2	2	0	0
P63325	40S ribosomal protein S10	Rps10	40S ribosomal protein S10 OS=Mus musculus OX=10090 GN=Rps10 PE=1 SV=1	4		19.7249	19.3126	20.6336	20.5494	20.1944	20.2789	4	4	23.6	120.694	8	0	0	4	3	0	1
Q6PDM2	Serine/arginine-rich splicing factor 1	Srsf1	Serine/arginine-rich splicing factor 1 OS=Mus musculus OX=10090 GN=Srsf1 PE=1 SV=3	5		NaN	18.661	19.616	19.8137	NaN	17.8292	5	5	24.2	75.92	6	0	0	2	4	0	0
P84244;P84228;P68433;P02301	Histone H3.3;Histone H3.2;Histone H3.1;Histone H3.3C	H3f3a;Hist1h3b;Hist1h3a;H3f3c	Histone H3.3 OS=Mus musculus OX=10090 GN=H3-3a PE=1 SV=2;Histone H3.2 OS=Mus musculus OX=10090 GN=H3c2 PE=1 SV=2;Histone H3.1 OS=Mus musculus OX=10090 GN=H3c1 PE=1 SV=2;Histone H3.3C OS=Mus musculus OX=10090 GN=H3-5 PE=3 SV=3	2		23.9569	24.383	24.7426	25.6897	25.054	25.7772	2	2	10.3	149.603	3	0	0	1	1	0	1
P62717	60S ribosomal protein L18a	Rpl18a	60S ribosomal protein L18a OS=Mus musculus OX=10090 GN=Rpl18a PE=1 SV=1	2		19.9479	NaN	20.9706	20.9887	NaN	20.7698	2	2	10.2	82.677	4	1	0	1	1	0	1
P27659	60S ribosomal protein L3	Rpl3	60S ribosomal protein L3 OS=Mus musculus OX=10090 GN=Rpl3 PE=1 SV=3	8		20.9808	21.1484	21.9695	22.2025	21.8214	22.0832	8	8	26.6	130.206	18	0	2	5	6	3	2
Q99NB9	Splicing factor 3B subunit 1	Sf3b1	Splicing factor 3B subunit 1 OS=Mus musculus OX=10090 GN=Sf3b1 PE=1 SV=1	12		18.6773	19.285	19.9696	19.9834	19.0234	18.9029	12	12	14	115.842	20	0	0	11	8	1	0
P62960	Nuclease-sensitive element-binding protein 1	Ybx1	Y-box-binding protein 1 OS=Mus musculus OX=10090 GN=Ybx1 PE=1 SV=3	5		19.9125	19.5431	21.0429	20.3986	19.429	19.3679	5	3	30.1	119.694	8	0	0	6	1	0	1
P14148	60S ribosomal protein L7	Rpl7	60S ribosomal protein L7 OS=Mus musculus OX=10090 GN=Rpl7 PE=1 SV=2	7		20.7497	21.1207	21.8001	21.9979	21.7137	21.5927	7	7	21.9	128.975	17	1	1	5	5	3	2
P13864	DNA (cytosine-5)-methyltransferase 1	Dnmt1	DNA (cytosine-5)-methyltransferase 1 OS=Mus musculus OX=10090 GN=Dnmt1 PE=1 SV=5	6		18.4082	18.2183	19.2335	19.2762	20.9865	21.4151	6	6	5.6	117.538	10	0	0	1	1	4	4
Q9CZM2	60S ribosomal protein L15	Rpl15	60S ribosomal protein L15 OS=Mus musculus OX=10090 GN=Rpl15 PE=1 SV=4	5		20.4755	21.051	21.5566	21.849	22.0172	21.9138	5	5	24	128.863	12	1	1	1	4	3	2
P62918	60S ribosomal protein L8	Rpl8	60S ribosomal protein L8 OS=Mus musculus OX=10090 GN=Rpl8 PE=1 SV=2	2		20.9905	20.9849	21.8302	21.973	22.2055	21.9317	2	2	10.5	129.916	8	2	1	2	1	1	1
P62900	60S ribosomal protein L31	Rpl31	60S ribosomal protein L31 OS=Mus musculus OX=10090 GN=Rpl31 PE=1 SV=1	2		20.723	20.7942	21.7988	21.4984	21.7245	21.5595	2	2	15.2	128.099	4	0	0	1	1	1	1
P62320	Small nuclear ribonucleoprotein Sm D3	Snrpd3	Small nuclear ribonucleoprotein Sm D3 OS=Mus musculus OX=10090 GN=Snrpd3 PE=1 SV=1	2		20.2104	20.3296	21.0939	21.1469	20.0558	20.4906	2	2	13.5	123.327	6	0	1	2	1	1	1
Q6ZWU9	40S ribosomal protein S27	Rps27	40S ribosomal protein S27 OS=Mus musculus OX=10090 GN=Rps27 PE=1 SV=3	2		20.2163	20.3423	21.1509	21.0971	21.7257	19.056	2	2	14.3	123.588	8	0	0	2	3	1	2
Q8CIG8	Protein arginine N-methyltransferase 5	Prmt5	Protein arginine N-methyltransferase 5 OS=Mus musculus OX=10090 GN=Prmt5 PE=1 SV=3	15		19.6735	21.2493	21.3281	21.2601	22.7285	22.9651	15	15	28.7	129.205	30	0	2	5	8	8	7
Q9JIK5	Nucleolar RNA helicase 2	Ddx21	Nucleolar RNA helicase 2 OS=Mus musculus OX=10090 GN=Ddx21 PE=1 SV=3	20		20.8984	21.2244	21.9132	21.8745	21.49	21.6329	20	20	30.1	129.034	47	0	2	15	17	7	6
O88477	Insulin-like growth factor 2 mRNA-binding protein 1	Igf2bp1	Insulin-like growth factor 2 mRNA-binding protein 1 OS=Mus musculus OX=10090 GN=Igf2bp1 PE=1 SV=1	17		21.1324	20.9777	21.9361	21.8136	19.7308	20.2988	17	16	35.4	125.889	30	1	2	12	12	0	3
Q3UYV9	Nuclear cap-binding protein subunit 1	Ncbp1	Nuclear cap-binding protein subunit 1 OS=Mus musculus OX=10090 GN=Ncbp1 PE=1 SV=2	4		18.6953	18.49	19.2182	19.5811	18.2489	18.2491	4	4	7.1	112.483	4	0	0	2	2	0	0
Q99KP6	Pre-mRNA-processing factor 19	Prpf19	Pre-mRNA-processing factor 19 OS=Mus musculus OX=10090 GN=Prpf19 PE=1 SV=1	5		20.1607	19.5287	20.7606	20.5422	19.2192	19.8219	5	5	15.1	120.033	10	1	0	4	4	0	1
Q8C4J7	Transducin beta-like protein 3	Tbl3	Transducin beta-like protein 3 OS=Mus musculus OX=10090 GN=Tbl3 PE=2 SV=1	2		NaN	17.2273	17.9716	18.0964	17.804	18.4648	2	2	3.7	89.564	0	0	0	0	0	0	0
Q61990	Poly(rC)-binding protein 2	Pcbp2	Poly(rC)-binding protein 2 OS=Mus musculus OX=10090 GN=Pcbp2 PE=1 SV=1	8		20.9988	20.8987	21.7317	21.7687	21.2301	21.2033	8	7	39	127.831	23	2	3	5	8	3	2
P97379	Ras GTPase-activating protein-binding protein 2	G3bp2	Ras GTPase-activating protein-binding protein 2 OS=Mus musculus OX=10090 GN=G3bp2 PE=1 SV=2	4		19.7252	19.8569	20.4748	20.7055	20.3794	20.0964	5	4	11	121.238	8	1	0	3	2	1	1
Q6ZWV3;P86048	60S ribosomal protein L10;60S ribosomal protein L10-like	Rpl10;Rpl10l	60S ribosomal protein L10 OS=Mus musculus OX=10090 GN=Rpl10 PE=1 SV=3;60S ribosomal protein L10-like OS=Mus musculus OX=10090 GN=Rpl10l PE=2 SV=1	5		21.9291	21.6291	22.5701	22.5339	22.3179	22.6623	5	5	21	133.642	17	2	2	4	3	2	4
P62281	40S ribosomal protein S11	Rps11	40S ribosomal protein S11 OS=Mus musculus OX=10090 GN=Rps11 PE=1 SV=3	5		21.6365	21.9261	22.5613	22.5312	22.671	22.6145	5	5	21.5	133.941	21	2	2	6	6	2	3
Q8BP67	60S ribosomal protein L24	Rpl24	60S ribosomal protein L24 OS=Mus musculus OX=10090 GN=Rpl24 PE=1 SV=2	3		NaN	21.3919	22.1927	22.1009	21.5042	21.3495	3	3	19.1	108.539	8	0	0	2	2	2	2
P62702	40S ribosomal protein S4, X isoform	Rps4x	40S ribosomal protein S4, X isoform OS=Mus musculus OX=10090 GN=Rps4x PE=1 SV=2	8		21.3572	21.1048	21.9575	21.9706	22.0511	22.2445	8	8	29.3	130.686	10	1	0	4	2	2	1
P62908	40S ribosomal protein S3	Rps3	40S ribosomal protein S3 OS=Mus musculus OX=10090 GN=Rps3 PE=1 SV=1	11		22.4438	22.7529	23.3331	23.3222	23.1291	23.3105	11	11	52.7	138.292	49	2	6	13	10	9	9
O09167	60S ribosomal protein L21	Rpl21	60S ribosomal protein L21 OS=Mus musculus OX=10090 GN=Rpl21 PE=1 SV=3	2		20.2404	20.8025	21.2009	21.2848	21.3701	21.7137	2	2	16.2	126.612	9	0	0	3	3	2	1
Q9JJI8	60S ribosomal protein L38	Rpl38	60S ribosomal protein L38 OS=Mus musculus OX=10090 GN=Rpl38 PE=1 SV=3	3		20.7048	20.4187	21.0799	21.4263	20.8242	21.0158	3	3	35.7	125.47	3	0	0	2	1	0	0
Q9D6Z1	Nucleolar protein 56	Nop56	Nucleolar protein 56 OS=Mus musculus OX=10090 GN=Nop56 PE=1 SV=2	7		19.0787	19.2236	19.9063	19.7543	20.0294	20.0791	7	7	15.3	118.072	13	0	1	3	5	2	2
P30681	High mobility group protein B2	Hmgb2	High mobility group protein B2 OS=Mus musculus OX=10090 GN=Hmgb2 PE=1 SV=3	2		19.3739	19.8038	20.3207	20.213	20.7802	20.9059	2	2	13.8	121.397	7	0	1	2	2	1	1
P51410	60S ribosomal protein L9	Rpl9	60S ribosomal protein L9 OS=Mus musculus OX=10090 GN=Rpl9 PE=2 SV=2	8		21.866	22.0384	22.4871	22.7521	22.5101	22.7354	8	8	52.6	134.389	43	3	4	11	8	8	9
Q6ZWV7	60S ribosomal protein L35	Rpl35	60S ribosomal protein L35 OS=Mus musculus OX=10090 GN=Rpl35 PE=1 SV=1	2		20.6232	20.4659	21.1897	21.1996	21.0332	20.8811	2	2	18.7	125.393	7	0	0	2	2	1	2
Q61545	RNA-binding protein EWS	Ewsr1	RNA-binding protein EWS OS=Mus musculus OX=10090 GN=Ewsr1 PE=1 SV=2	5		20.5238	20.0773	20.8018	21.034	NaN	18.3835	5	5	9.9	100.82	7	1	0	2	4	0	0
P35980	60S ribosomal protein L18	Rpl18	60S ribosomal protein L18 OS=Mus musculus OX=10090 GN=Rpl18 PE=1 SV=3	5		21.5031	21.3312	22.1161	21.9268	21.7411	22.0254	5	5	29.8	130.644	24	2	3	6	6	3	4
P29341	Polyadenylate-binding protein 1	Pabpc1	Polyadenylate-binding protein 1 OS=Mus musculus OX=10090 GN=Pabpc1 PE=1 SV=2	17		20.27	20.391	20.952	20.9035	19.7561	20.0946	17	17	35.4	122.367	32	1	2	13	13	1	2
P62317	Small nuclear ribonucleoprotein Sm D2	Snrpd2	Small nuclear ribonucleoprotein Sm D2 OS=Mus musculus OX=10090 GN=Snrpd2 PE=1 SV=1	3		20.3838	21.3474	21.4324	21.4551	20.7965	20.6522	3	3	29.7	126.067	8	0	1	3	2	1	1
Q6DFW4	Nucleolar protein 58	Nop58	Nucleolar protein 58 OS=Mus musculus OX=10090 GN=Nop58 PE=1 SV=1	9		19.6109	20.0938	20.334	20.5045	20.4512	20.4365	9	9	25	121.431	13	0	1	4	3	2	3
Q9CR57	60S ribosomal protein L14	Rpl14	60S ribosomal protein L14 OS=Mus musculus OX=10090 GN=Rpl14 PE=1 SV=3	3		19.9399	20.6665	20.8916	20.8464	20.7128	20.6991	3	3	17.1	123.756	12	0	1	4	3	2	2
P67984	60S ribosomal protein L22	Rpl22	60S ribosomal protein L22 OS=Mus musculus OX=10090 GN=Rpl22 PE=1 SV=2	2		21.0639	20.9872	21.5971	21.5779	21.5833	21.7183	2	2	18.8	128.528	9	0	1	2	2	2	2
O70194	Eukaryotic translation initiation factor 3 subunit D	Eif3d	Eukaryotic translation initiation factor 3 subunit D OS=Mus musculus OX=10090 GN=Eif3d PE=1 SV=2	4		19.8464	20.1131	20.5676	20.4977	20.4967	19.9916	4	4	10.9	121.513	7	0	1	3	2	1	0
Q9D8E6	60S ribosomal protein L4	Rpl4	60S ribosomal protein L4 OS=Mus musculus OX=10090 GN=Rpl4 PE=1 SV=3	9		21.9326	21.7349	22.4025	22.3409	22.2822	22.2175	9	9	23.9	132.911	30	1	2	8	8	6	5
Q9EQU5	Protein SET	Set	Protein SET OS=Mus musculus OX=10090 GN=Set PE=1 SV=1	6		19.4917	19.2761	19.8463	19.9952	20.2553	19.8227	6	6	33.9	118.687	8	0	0	3	3	2	0
Q6ZWN5	40S ribosomal protein S9	Rps9	40S ribosomal protein S9 OS=Mus musculus OX=10090 GN=Rps9 PE=1 SV=3	7		21.3438	22.4345	22.4749	22.3649	22.4923	22.8919	7	7	28.4	134.002	18	0	3	4	4	3	4
Q8K224	N-acetyltransferase 10	Nat10	RNA cytidine acetyltransferase OS=Mus musculus OX=10090 GN=Nat10 PE=1 SV=1	2		17.4128	NaN	18.3167	17.5633	17.7208	17.7619	2	2	3.7	88.7755	2	0	0	2	0	0	0
Q99N96	39S ribosomal protein L1, mitochondrial	Mrpl1	39S ribosomal protein L1, mitochondrial OS=Mus musculus OX=10090 GN=Mrpl1 PE=1 SV=2	5		19.7673	19.8458	21.0532	19.6041	19.4432	19.3631	5	5	21.4	119.077	6	0	0	5	1	0	0
Q62376	U1 small nuclear ribonucleoprotein 70 kDa	Snrnp70	U1 small nuclear ribonucleoprotein 70 kDa OS=Mus musculus OX=10090 GN=Snrnp70 PE=1 SV=2	10		22.1086	22.1234	22.6499	22.6135	21.1052	21.5273	10	10	27	132.128	22	3	3	4	10	1	1
P62911	60S ribosomal protein L32	Rpl32	60S ribosomal protein L32 OS=Mus musculus OX=10090 GN=Rpl32 PE=1 SV=2	2		18.6144	NaN	19.2847	18.9646	NaN	18.0013	2	2	11.1	74.865	3	0	0	2	1	0	0
P41105	60S ribosomal protein L28	Rpl28	60S ribosomal protein L28 OS=Mus musculus OX=10090 GN=Rpl28 PE=1 SV=2	4		20.7485	20.8678	21.4531	21.1708	21.7355	21.77	4	4	24.1	127.746	12	0	1	3	2	2	4
P53026	60S ribosomal protein L10a	Rpl10a	60S ribosomal protein L10a OS=Mus musculus OX=10090 GN=Rpl10a PE=1 SV=3	5		20.1888	21.3699	21.3558	21.152	20.8915	20.9546	5	5	22.6	125.913	12	0	2	3	4	2	1
P57784	U2 small nuclear ribonucleoprotein A	Snrpa1	U2 small nuclear ribonucleoprotein A OS=Mus musculus OX=10090 GN=Snrpa1 PE=1 SV=2	3		18.7561	18.7094	19.2508	19.1542	18.4731	18.4539	3	3	22	112.797	4	0	0	3	1	0	0
P62082	40S ribosomal protein S7	Rps7	40S ribosomal protein S7 OS=Mus musculus OX=10090 GN=Rps7 PE=2 SV=1	5		21.6112	21.2379	21.9833	21.8009	21.8121	21.9658	5	5	26.8	130.411	13	1	0	5	3	2	2
Q99LC2	Cleavage stimulation factor subunit 1	Cstf1	Cleavage stimulation factor subunit 1 OS=Mus musculus OX=10090 GN=Cstf1 PE=1 SV=1	2		18.9243	18.3932	19.2953	18.9467	18.0776	18.4331	2	2	7.7	112.07	4	0	0	2	2	0	0
Q99JX7	Nuclear RNA export factor 1	Nxf1	Nuclear RNA export factor 1 OS=Mus musculus OX=10090 GN=Nxf1 PE=1 SV=3	7		18.9195	18.9415	19.3116	19.463	19.1606	18.8584	7	7	18.1	114.655	9	0	0	3	6	0	0
P62315	Small nuclear ribonucleoprotein Sm D1	Snrpd1	Small nuclear ribonucleoprotein Sm D1 OS=Mus musculus OX=10090 GN=Snrpd1 PE=1 SV=1	3		21.3092	21.1107	21.7251	21.5755	20.492	20.3049	3	3	37	126.517	15	2	2	4	4	1	2
Q9CPR4	60S ribosomal protein L17	Rpl17	60S ribosomal protein L17 OS=Mus musculus OX=10090 GN=Rpl17 PE=1 SV=3	6		23.0183	23.0653	23.5657	23.392	23.3056	23.431	6	6	32.6	139.778	21	2	3	5	5	3	3
Q62189	U1 small nuclear ribonucleoprotein A	Snrpa	U1 small nuclear ribonucleoprotein A OS=Mus musculus OX=10090 GN=Snrpa PE=1 SV=3	5		20.2445	20.3631	20.9102	20.5511	18.7667	19.6545	5	5	28.9	120.49	7	0	0	3	3	1	0
CON__P35527				21	+	21.041	22.2822	22.0811	22.0815	22.9059	22.7696	22	21	51.7	133.161	52	3	8	13	12	8	8
Q5SWD9	Pre-rRNA-processing protein TSR1 homolog	Tsr1	Pre-rRNA-processing protein TSR1 homolog OS=Mus musculus OX=10090 GN=Tsr1 PE=1 SV=1	2		NaN	17.5921	NaN	18.0083	NaN	NaN	2	2	3.5	35.6003	1	0	0	0	1	0	0
Q6PE01	U5 small nuclear ribonucleoprotein 40 kDa protein	Snrnp40	U5 small nuclear ribonucleoprotein 40 kDa protein OS=Mus musculus OX=10090 GN=Snrnp40 PE=1 SV=1	3		19.4101	18.7602	19.4811	19.5122	NaN	18.9584	3	3	18.4	96.122	5	0	0	2	3	0	0
Q64152	Transcription factor BTF3	Btf3	Transcription factor BTF3 OS=Mus musculus OX=10090 GN=Btf3 PE=1 SV=3	2		18.2635	18.0015	NaN	18.5287	18.3332	18.0438	2	2	20.1	91.1707	1	0	0	0	1	0	0
P25444	40S ribosomal protein S2	Rps2	40S ribosomal protein S2 OS=Mus musculus OX=10090 GN=Rps2 PE=1 SV=3	10		22.0984	22.3057	22.7235	22.4726	22.5804	22.6346	10	10	36.9	134.815	37	4	7	10	7	5	4
P60335	Poly(rC)-binding protein 1	Pcbp1	Poly(rC)-binding protein 1 OS=Mus musculus OX=10090 GN=Pcbp1 PE=1 SV=1	5		21.3322	21.2954	21.6476	21.732	21.156	21.4016	6	5	26.4	128.565	15	1	1	3	5	2	3
P35922	Fragile X mental retardation protein 1 homolog	Fmr1	Synaptic functional regulator FMR1 OS=Mus musculus OX=10090 GN=Fmr1 PE=1 SV=1	2		18.3153	18.2997	18.6218	18.7451	NaN	17.8565	3	1	6.8	91.8383	4	0	0	2	2	0	0
P43277	Histone H1.3	Hist1h1d	Histone H1.3 OS=Mus musculus OX=10090 GN=H1-3 PE=1 SV=2	3		21.4604	22.9462	22.548	22.562	23.4994	23.7464	5	1	25.3	136.762	12	2	1	4	2	1	2
Q9CY27	Very-long-chain enoyl-CoA reductase	Tecr	Very-long-chain enoyl-CoA reductase OS=Mus musculus OX=10090 GN=Tecr PE=1 SV=1	2		18.074	18.9178	18.998	18.6172	18.7813	19.0148	2	2	6.8	112.403	1	0	0	1	0	0	0
P97855	Ras GTPase-activating protein-binding protein 1	G3bp1	Ras GTPase-activating protein-binding protein 1 OS=Mus musculus OX=10090 GN=G3bp1 PE=1 SV=1	9		19.5783	20.2841	20.2938	20.1888	19.3677	19.6235	9	8	29.7	119.336	12	0	1	6	5	0	0
Q1HFZ0	tRNA (cytosine(34)-C(5))-methyltransferase	Nsun2	RNA cytosine C(5)-methyltransferase NSUN2 OS=Mus musculus OX=10090 GN=Nsun2 PE=1 SV=2	3		18.6066	18.5101	18.4379	19.2972	18.9875	20.0015	3	3	5.8	113.841	3	0	0	0	1	0	2
CON__P04264				27	+	22.0644	23.5507	23.104	23.1098	23.8467	23.9819	27	18	41.1	139.658	62	3	9	12	14	14	10
Q5SUF2	Luc7-like protein 3	Luc7l3	Luc7-like protein 3 OS=Mus musculus OX=10090 GN=Luc7l3 PE=1 SV=1	2		18.3575	18.1808	18.5432	18.5259	NaN	17.8701	2	2	6.7	91.4776	1	0	0	0	1	0	0
Q99LE6	ATP-binding cassette sub-family F member 2	Abcf2	ATP-binding cassette sub-family F member 2 OS=Mus musculus OX=10090 GN=Abcf2 PE=1 SV=1	4		19.4771	20.1357	20.0998	20.0374	20.3766	20.8666	4	4	7.8	120.993	12	1	1	3	4	2	1
P36993	Protein phosphatase 1B	Ppm1b	Protein phosphatase 1B OS=Mus musculus OX=10090 GN=Ppm1b PE=1 SV=1	7		18.6969	19.6954	19.3864	19.5199	21.6781	21.6074	7	7	27.9	120.584	15	0	1	0	3	6	5
P62270	40S ribosomal protein S18	Rps18	40S ribosomal protein S18 OS=Mus musculus OX=10090 GN=Rps18 PE=1 SV=3	5		19.5778	19.3186	19.6052	19.8023	20.0498	20.0593	5	5	32.2	118.413	12	1	1	2	5	2	1
P62245	40S ribosomal protein S15a	Rps15a	40S ribosomal protein S15a OS=Mus musculus OX=10090 GN=Rps15a PE=1 SV=2	3		21.6439	21.9218	22.0567	21.9996	22.4397	22.6581	3	3	33.1	132.72	14	2	2	2	3	3	2
O08583	THO complex subunit 4	Alyref	THO complex subunit 4 OS=Mus musculus OX=10090 GN=Alyref PE=1 SV=3	5		20.4116	20.3457	20.732	20.5125	19.3287	19.5027	5	5	27.5	120.833	6	0	1	2	3	0	0
Q8BVY0	Ribosomal L1 domain-containing protein 1	Rsl1d1	Ribosomal L1 domain-containing protein 1 OS=Mus musculus OX=10090 GN=Rsl1d1 PE=1 SV=1	4		19.4337	20.2557	20.1851	19.9582	19.5264	20.1817	4	4	15.7	119.541	10	0	1	4	4	0	1
P14115	60S ribosomal protein L27a	Rpl27a	60S ribosomal protein L27a OS=Mus musculus OX=10090 GN=Rpl27a PE=1 SV=5	2		22.3113	22.317	22.7482	22.3216	22.5102	22.9594	2	2	14.2	135.168	5	1	0	1	1	1	1
Q7TNC4	Putative RNA-binding protein Luc7-like 2	Luc7l2	Putative RNA-binding protein Luc7-like 2 OS=Mus musculus OX=10090 GN=Luc7l2 PE=1 SV=1	2		18.0098	NaN	18.1951	18.2472	NaN	NaN	2	2	6.1	54.4521	2	0	0	1	1	0	0
P47962	60S ribosomal protein L5	Rpl5	60S ribosomal protein L5 OS=Mus musculus OX=10090 GN=Rpl5 PE=1 SV=3	3		20.2641	20.8287	20.7012	20.7966	21.029	20.7704	3	3	12.5	124.39	9	0	2	3	2	1	1
O35286	Pre-mRNA-splicing factor ATP-dependent RNA helicase DHX15	Dhx15	Pre-mRNA-splicing factor ATP-dependent RNA helicase DHX15 OS=Mus musculus OX=10090 GN=Dhx15 PE=1 SV=2	11		20.7394	20.4434	20.698	20.8883	19.3472	20.6966	11	11	17.6	122.813	12	0	1	5	5	0	1
P14131	40S ribosomal protein S16	Rps16	40S ribosomal protein S16 OS=Mus musculus OX=10090 GN=Rps16 PE=1 SV=4	7		21.3718	21.9664	21.8727	21.862	21.7365	21.8758	7	7	43.8	130.685	18	0	1	3	6	3	5
P16460	Argininosuccinate synthase	Ass1	Argininosuccinate synthase OS=Mus musculus OX=10090 GN=Ass1 PE=1 SV=1	3		19.8554	19.8348	20.1584	19.926	20.1554	20.5296	3	3	10.7	120.46	4	0	0	2	1	0	1
CON__P13647;CON__P48668;CON__P04259;CON__P02538			;;;	4	+	18.316	17.6697	18.6271	17.7487	19.6939	19.8113	8	3	12.5	111.867	5	0	0	1	0	2	2
Q9CXW4	60S ribosomal protein L11	Rpl11	60S ribosomal protein L11 OS=Mus musculus OX=10090 GN=Rpl11 PE=1 SV=4	6		22.3404	22.6173	22.6748	22.6697	22.968	23.1354	6	6	41	136.406	16	0	2	4	4	2	4
P61255	60S ribosomal protein L26	Rpl26	60S ribosomal protein L26 OS=Mus musculus OX=10090 GN=Rpl26 PE=1 SV=1	3		20.7468	20.7078	20.8973	20.9344	21.0713	20.6087	3	3	12.4	124.966	9	1	1	1	2	2	2
Q9CQF3	Cleavage and polyadenylation specificity factor subunit 5	Nudt21	Cleavage and polyadenylation specificity factor subunit 5 OS=Mus musculus OX=10090 GN=Nudt21 PE=1 SV=1	5		19.0801	19.4011	19.532	19.2871	18.351	NaN	5	5	36.1	95.6513	6	0	1	4	1	0	0
Q9EPU4	Cleavage and polyadenylation specificity factor subunit 1	Cpsf1	Cleavage and polyadenylation specificity factor subunit 1 OS=Mus musculus OX=10090 GN=Cpsf1 PE=1 SV=1	2		17.3934	17.4294	17.5561	17.5851	NaN	17.6469	2	2	1.9	87.6109	0	0	0	0	0	0	0
P20152	Vimentin	Vim	Vimentin OS=Mus musculus OX=10090 GN=Vim PE=1 SV=3	5		19.1249	19.1864	19.2414	19.3489	20.2084	19.5848	5	5	13.3	116.695	5	0	0	1	2	2	0
Q8VH51	RNA-binding protein 39	Rbm39	RNA-binding protein 39 OS=Mus musculus OX=10090 GN=Rbm39 PE=1 SV=2	5		20.3229	19.9127	20.2697	20.2409	19.0753	19.6803	5	5	12.6	119.502	9	0	0	3	4	1	1
P43275	Histone H1.1	Hist1h1a	Histone H1.1 OS=Mus musculus OX=10090 GN=H1-1 PE=1 SV=2	6		22.1753	23.4422	22.8973	22.9793	23.8501	24.0127	6	4	36.2	139.357	19	1	2	5	3	4	4
Q62167;P16381	ATP-dependent RNA helicase DDX3X;Putative ATP-dependent RNA helicase Pl10	Ddx3x;D1Pas1	ATP-dependent RNA helicase DDX3X OS=Mus musculus OX=10090 GN=Ddx3x PE=1 SV=3;Putative ATP-dependent RNA helicase Pl10 OS=Mus musculus OX=10090 GN=D1Pas1 PE=1 SV=1	13		21.295	21.3521	21.4429	21.4512	21.0352	21.3278	14	3	28.9	127.904	44	4	5	10	13	7	5
Q05CL8	La-related protein 7	Larp7	La-related protein 7 OS=Mus musculus OX=10090 GN=Larp7 PE=1 SV=2	4		17.7521	18.396	18.2679	18.1057	NaN	18.0958	4	4	8.6	90.6177	3	0	0	2	1	0	0
Q9QZD9	Eukaryotic translation initiation factor 3 subunit I	Eif3i	Eukaryotic translation initiation factor 3 subunit I OS=Mus musculus OX=10090 GN=Eif3i PE=1 SV=1	3		19.1258	19.2457	19.163	19.3849	19.405	19.8336	3	3	17.5	116.158	6	0	0	2	3	0	1
P63101	14-3-3 protein zeta/delta	Ywhaz	14-3-3 protein zeta/delta OS=Mus musculus OX=10090 GN=Ywhaz PE=1 SV=1	2		19.6459	17.1255	18.337	18.5978	19.7486	20.2723	3	2	14.7	113.727	3	0	0	0	1	1	1
Q9CY66	H/ACA ribonucleoprotein complex subunit 1	Gar1	H/ACA ribonucleoprotein complex subunit 1 OS=Mus musculus OX=10090 GN=Gar1 PE=1 SV=1	2		18.7115	18.5198	18.5479	18.8235	19.1184	NaN	2	2	7.8	93.7211	3	0	0	1	2	0	0
P63323	40S ribosomal protein S12	Rps12	40S ribosomal protein S12 OS=Mus musculus OX=10090 GN=Rps12 PE=1 SV=2	3		20.0069	19.7288	20.0521	19.815	20.1134	20.192	3	3	30.3	119.908	7	0	0	4	2	0	1
Q08288	Cell growth-regulating nucleolar protein	Lyar	Cell growth-regulating nucleolar protein OS=Mus musculus OX=10090 GN=Lyar PE=1 SV=2	2		18.2764	18.1562	18.7212	17.7914	18.737	18.3942	2	2	9.3	110.076	2	0	0	2	0	0	0
Q99J09	Methylosome protein 50	Wdr77	Methylosome protein 50 OS=Mus musculus OX=10090 GN=Wdr77 PE=1 SV=1	5		21.5943	21.2717	21.5461	21.3689	22.9618	23.1506	5	5	24.3	131.893	12	0	0	4	3	2	3
P97822	Acidic leucine-rich nuclear phosphoprotein 32 family member E	Anp32e	Acidic leucine-rich nuclear phosphoprotein 32 family member E OS=Mus musculus OX=10090 GN=Anp32e PE=1 SV=2	4		19.5104	19.6967	19.6543	19.5929	21.4377	21.8074	4	4	19.2	121.699	10	0	0	1	3	3	3
Q8CGP2;Q8CGP1;Q6ZWY9;Q64525;Q64478;Q64475;P10854;P10853	Histone H2B type 1-P;Histone H2B type 1-K;Histone H2B type 1-C/E/G;Histone H2B type 2-B;Histone H2B type 1-H;Histone H2B type 1-B;Histone H2B type 1-M;Histone H2B type 1-F/J/L	Hist1h2bp;Hist1h2bk;Hist1h2bc;Hist2h2bb;Hist1h2bh;Hist1h2bb;Hist1h2bm;Hist1h2bf	Histone H2B type 1-P OS=Mus musculus OX=10090 GN=Hist1h2bp PE=1 SV=3;Histone H2B type 1-K OS=Mus musculus OX=10090 GN=H2bc12 PE=1 SV=3;Histone H2B type 1-C/E/G OS=Mus musculus OX=10090 GN=H2bc4 PE=1 SV=3;Histone H2B type 2-B OS=Mus musculus OX=10090 GN=His	5		25.8084	25.4578	25.609	25.6806	26.3226	26.1597	5	5	34.1	155.038	21	3	3	3	4	4	4
Q923E4	NAD-dependent protein deacetylase sirtuin-1;SirtT1 75 kDa fragment	Sirt1	NAD-dependent protein deacetylase sirtuin-1 OS=Mus musculus OX=10090 GN=Sirt1 PE=1 SV=2	2		NaN	NaN	NaN	NaN	19.08	19.4012	2	2	4.7	38.4813	1	0	0	0	0	1	0
Q3TXU5	Deoxyhypusine synthase	Dhps	Deoxyhypusine synthase OS=Mus musculus OX=10090 GN=Dhps PE=1 SV=2	3		NaN	NaN	NaN	NaN	NaN	NaN	3	3	11.9	0	0	0	0	0	0	0	0
Q8R1B4	Eukaryotic translation initiation factor 3 subunit C	Eif3c	Eukaryotic translation initiation factor 3 subunit C OS=Mus musculus OX=10090 GN=Eif3c PE=1 SV=1	2		19.0684	18.6906	19.0513	18.6186	NaN	17.8768	2	2	2.2	93.3056	2	0	0	1	1	0	0
Q61584	Fragile X mental retardation syndrome-related protein 1	Fxr1	Fragile X mental retardation syndrome-related protein 1 OS=Mus musculus OX=10090 GN=Fxr1 PE=1 SV=2	7		19.8296	20.2247	20.0026	19.936	19.82	19.8387	7	6	16.8	119.652	14	1	2	2	6	1	2
P62806	Histone H4	Hist1h4a	Histone H4 OS=Mus musculus OX=10090 GN=H4c1 PE=1 SV=2	9		23.7956	24.3308	24.1104	23.888	24.7936	24.9799	9	9	59.2	145.898	41	5	5	10	8	5	8
Q8VDW0	ATP-dependent RNA helicase DDX39A	Ddx39a	ATP-dependent RNA helicase DDX39A OS=Mus musculus OX=10090 GN=Ddx39a PE=1 SV=1	9		22.0284	21.7135	21.79	21.8236	21.9414	22.207	9	3	23.7	131.504	22	1	1	6	5	5	4
Q6NV83	U2 snRNP-associated SURP motif-containing protein	U2surp	U2 snRNP-associated SURP motif-containing protein OS=Mus musculus OX=10090 GN=U2surp PE=1 SV=3	2		NaN	18.5636	18.4231	18.5521	18.2306	18.0378	2	2	2.5	91.8071	2	0	0	0	2	0	0
P43276	Histone H1.5	Hist1h1b	Histone H1.5 OS=Mus musculus OX=10090 GN=H1-5 PE=1 SV=2	3		20.363	21.8052	20.8873	21.1191	22.0153	22.1824	4	3	20.6	128.372	8	0	2	1	2	2	1
Q9CY58	Plasminogen activator inhibitor 1 RNA-binding protein	Serbp1	Plasminogen activator inhibitor 1 RNA-binding protein OS=Mus musculus OX=10090 GN=Serbp1 PE=1 SV=2	2		20.9494	21.4144	21.5782	20.5892	20.0895	19.738	2	2	6.9	124.359	5	1	1	1	1	1	0
Q6NVF9	Cleavage and polyadenylation specificity factor subunit 6	Cpsf6	Cleavage and polyadenylation specificity factor subunit 6 OS=Mus musculus OX=10090 GN=Cpsf6 PE=1 SV=1	3		19.0498	18.832	18.7702	18.866	18.4651	18.1271	3	3	9.4	112.11	3	0	0	1	2	0	0
P54823	Probable ATP-dependent RNA helicase DDX6	Ddx6	Probable ATP-dependent RNA helicase DDX6 OS=Mus musculus OX=10090 GN=Ddx6 PE=1 SV=1	2		18.1687	18.3005	17.9882	18.2149	NaN	18.1498	2	2	5.2	90.8222	3	0	0	1	2	0	0
Q99MN1	Lysine--tRNA ligase	Kars	Lysine--tRNA ligase OS=Mus musculus OX=10090 GN=Kars1 PE=1 SV=1	4		18.5426	18.91	18.4996	18.679	19.6136	18.8282	4	4	7.2	113.073	9	0	0	4	3	1	1
P52479	Ubiquitin carboxyl-terminal hydrolase 10	Usp10	Ubiquitin carboxyl-terminal hydrolase 10 OS=Mus musculus OX=10090 GN=Usp10 PE=1 SV=3	3		19.5764	19.3757	19.4511	19.2223	19.3093	18.6159	3	3	5.3	115.551	7	0	0	4	3	0	0
P19253	60S ribosomal protein L13a	Rpl13a	60S ribosomal protein L13a OS=Mus musculus OX=10090 GN=Rpl13a PE=1 SV=4	3		21.9374	21.668	21.6943	21.6132	22.143	22.2398	3	3	16.3	131.296	15	2	2	4	3	2	2
Q8BGD9	Eukaryotic translation initiation factor 4B	Eif4b	Eukaryotic translation initiation factor 4B OS=Mus musculus OX=10090 GN=Eif4b PE=1 SV=1	2		NaN	19.2251	18.2363	19.9131	20.3369	19.8077	2	2	4.9	97.5191	2	0	0	1	0	0	1
Q9R1T2	SUMO-activating enzyme subunit 1;SUMO-activating enzyme subunit 1, N-terminally processed	Sae1	SUMO-activating enzyme subunit 1 OS=Mus musculus OX=10090 GN=Sae1 PE=1 SV=1	2		18.5926	18.5832	18.4832	18.3902	NaN	18.5083	2	2	11.4	92.5575	2	0	0	1	0	0	1
Q60817;P70670	Nascent polypeptide-associated complex subunit alpha;Nascent polypeptide-associated complex subunit alpha, muscle-specific form	Naca	Nascent polypeptide-associated complex subunit alpha OS=Mus musculus OX=10090 GN=Naca PE=1 SV=1;Nascent polypeptide-associated complex subunit alpha, muscle-specific form OS=Mus musculus OX=10090 GN=Naca PE=1 SV=2	2		19.1482	19.229	18.9933	19.0584	19.6618	19.3966	2	2	13.5	115.487	5	0	1	2	1	1	0
Q8JZQ9	Eukaryotic translation initiation factor 3 subunit B	Eif3b	Eukaryotic translation initiation factor 3 subunit B OS=Mus musculus OX=10090 GN=Eif3b PE=1 SV=1	5		19.275	19.4992	19.1253	19.2884	19.5827	19.7984	5	5	10.2	116.569	6	0	0	3	2	1	0
P62827	GTP-binding nuclear protein Ran	Ran	GTP-binding nuclear protein Ran OS=Mus musculus OX=10090 GN=Ran PE=1 SV=3	7		22.6427	22.928	22.6025	22.582	23.086	23.2797	7	7	38.4	137.121	30	4	3	5	6	6	6
Q8VIG1	RE1-silencing transcription factor	Rest	RE1-silencing transcription factor OS=Mus musculus OX=10090 GN=Rest PE=1 SV=2	5		17.7936	19.1479	18.0166	18.4541	19.7817	20.1021	5	5	6.4	113.296	6	0	0	0	2	1	3
P84099	60S ribosomal protein L19	Rpl19	60S ribosomal protein L19 OS=Mus musculus OX=10090 GN=Rpl19 PE=1 SV=1	2		21.5414	20.6454	20.9382	20.7689	21.0947	21.4877	2	2	13.3	126.476	7	1	1	1	1	1	2
Q91ZW3	SWI/SNF-related matrix-associated actin-dependent regulator of chromatin subfamily A member 5	Smarca5	SWI/SNF-related matrix-associated actin-dependent regulator of chromatin subfamily A member 5 OS=Mus musculus OX=10090 GN=Smarca5 PE=1 SV=1	7		19.7159	19.7718	19.4753	19.5326	20.2206	20.2596	7	7	6.5	118.976	8	0	0	3	2	1	2
B2RY56	RNA-binding protein 25	Rbm25	RNA-binding protein 25 OS=Mus musculus OX=10090 GN=Rbm25 PE=1 SV=2	2		18.884	18.8641	18.5295	18.6717	18.5802	18.634	2	2	3.8	112.163	1	0	0	1	0	0	0
P26443	Glutamate dehydrogenase 1, mitochondrial	Glud1	Glutamate dehydrogenase 1, mitochondrial OS=Mus musculus OX=10090 GN=Glud1 PE=1 SV=1	4		19.0304	19.2408	18.8218	18.902	19.7844	19.6181	4	4	10	115.398	5	0	0	1	1	2	1
Q3U9G9	Lamin-B receptor	Lbr	Delta(14)-sterol reductase LBR OS=Mus musculus OX=10090 GN=Lbr PE=1 SV=2	3		20.4411	19.7576	19.8877	19.7614	20.1448	20.0358	3	3	6.1	120.028	8	1	0	3	2	1	1
P60867	40S ribosomal protein S20	Rps20	40S ribosomal protein S20 OS=Mus musculus OX=10090 GN=Rps20 PE=1 SV=1	2		21.6463	22.2115	22.1328	21.1117	21.7863	22.5933	2	2	19.3	131.482	9	2	1	1	1	2	2
Q91VC3	Eukaryotic initiation factor 4A-III;Eukaryotic initiation factor 4A-III, N-terminally processed	Eif4a3	Eukaryotic initiation factor 4A-III OS=Mus musculus OX=10090 GN=Eif4a3 PE=1 SV=3	9		20.2923	20.6269	20.144	20.1609	19.8184	19.8348	10	9	27	120.877	13	0	2	7	4	0	0
Q9QZQ8;Q8CCK0	Core histone macro-H2A.1;Core histone macro-H2A.2	H2afy;H2afy2	Core histone macro-H2A.1 OS=Mus musculus OX=10090 GN=Macroh2a1 PE=1 SV=3;Core histone macro-H2A.2 OS=Mus musculus OX=10090 GN=Macroh2a2 PE=1 SV=3	2		19.7045	NaN	19.5709	19.2063	20.0197	19.9292	2	2	9.9	98.4307	0	0	0	0	0	0	0
Q91VR2	ATP synthase subunit gamma, mitochondrial	Atp5c1	ATP synthase subunit gamma, mitochondrial OS=Mus musculus OX=10090 GN=Atp5f1c PE=1 SV=1	4		NaN	23.6095	23.3042	23.2763	24.0272	24.2536	4	4	14.4	118.471	14	1	0	4	4	3	2
Q9CZU3	Superkiller viralicidic activity 2-like 2	Skiv2l2	Exosome RNA helicase MTR4 OS=Mus musculus OX=10090 GN=Mtrex PE=1 SV=1	4		19.1002	20.0872	19.3888	19.1531	18.9212	18.5492	4	4	5	115.2	5	0	1	1	3	0	0
P28658	Ataxin-10	Atxn10	Ataxin-10 OS=Mus musculus OX=10090 GN=Atxn10 PE=1 SV=2	3		18.2829	18.3188	17.9776	NaN	18.9904	19.9201	3	3	6.7	93.4898	2	0	0	1	0	0	1
C0HKE6;C0HKE1;C0HKE7;C0HKE2;C0HKE3;C0HKE4;C0HKE5;C0HKE9;C0HKE8;Q8BFU2;Q8CGP7;Q8CGP5;Q8CGP6;Q6GSS7;Q8R1M2;Q64523;P27661	Histone H2A type 3;Histone H2A type 1-K;Histone H2A type 1-F;Histone H2A type 1-H;Histone H2A type 2-A;Histone H2A.J;Histone H2A type 2-C;Histone H2AX	Hist3h2a;Hist1h2ak;Hist1h2af;Hist1h2ah;Hist2h2aa1;H2afj;Hist2h2ac;H2afx	Histone H2A type 1-I OS=Mus musculus OX=10090 GN=H2ac13 PE=1 SV=1;Histone H2A type 1-B OS=Mus musculus OX=10090 GN=H2ac4 PE=1 SV=1;Histone H2A type 1-N OS=Mus musculus OX=10090 GN=Hist1h2an PE=1 SV=1;Histone H2A type 1-C OS=Mus musculus OX=10090 GN=H2ac6 P	3		24.3314	23.6455	23.8149	23.5136	24.8777	25.0032	3	1	26.9	145.186	11	2	2	2	1	3	1
Q8CGC7	Bifunctional glutamate/proline--tRNA ligase;Glutamate--tRNA ligase;Proline--tRNA ligase	Eprs	Bifunctional glutamate/proline--tRNA ligase OS=Mus musculus OX=10090 GN=Eprs1 PE=1 SV=4	6		18.8455	18.7008	18.3254	18.5034	18.8879	19.0314	6	6	5.2	112.294	6	0	0	4	0	2	0
Q7TPV4	Myb-binding protein 1A	Mybbp1a	Myb-binding protein 1A OS=Mus musculus OX=10090 GN=Mybbp1a PE=1 SV=2	24		21.3397	21.1536	20.8522	20.8776	20.4075	20.6207	24	24	26.4	125.251	41	1	8	10	10	5	7
Q9CQD1;P61021;P35278	Ras-related protein Rab-5A;Ras-related protein Rab-5B;Ras-related protein Rab-5C	Rab5a;Rab5b;Rab5c	Ras-related protein Rab-5A OS=Mus musculus OX=10090 GN=Rab5a PE=1 SV=1;Ras-related protein Rab-5B OS=Mus musculus OX=10090 GN=Rab5b PE=1 SV=1;Ras-related protein Rab-5C OS=Mus musculus OX=10090 GN=Rab5c PE=1 SV=2	2		20.8903	21.0829	21.1269	20.0768	20.8258	20.6468	2	2	10.7	124.649	1	0	0	1	0	0	0
Q8K3F7	L-threonine 3-dehydrogenase, mitochondrial	Tdh	L-threonine 3-dehydrogenase, mitochondrial OS=Mus musculus OX=10090 GN=Tdh PE=1 SV=1	8		21.5632	21.5986	21.2274	21.1632	21.469	21.6042	8	8	39.1	128.626	47	4	7	11	12	6	7
P47963	60S ribosomal protein L13	Rpl13	60S ribosomal protein L13 OS=Mus musculus OX=10090 GN=Rpl13 PE=1 SV=3	6		22.265	21.9271	21.6781	21.74	22.276	22.5412	6	6	28.4	132.427	20	2	1	5	5	3	4
Q921M3	Splicing factor 3B subunit 3	Sf3b3	Splicing factor 3B subunit 3 OS=Mus musculus OX=10090 GN=Sf3b3 PE=1 SV=1	3		18.3136	18.3793	17.8886	18.0189	17.7788	18.054	3	3	3.2	108.433	3	0	0	2	1	0	0
O88508	DNA (cytosine-5)-methyltransferase 3A	Dnmt3a	DNA (cytosine-5)-methyltransferase 3A OS=Mus musculus OX=10090 GN=Dnmt3a PE=1 SV=2	3		18.0555	17.8124	17.5498	17.5302	18.3748	19.4654	3	3	3.9	108.788	3	0	0	0	0	0	3
Q8K363	ATP-dependent RNA helicase DDX18	Ddx18	ATP-dependent RNA helicase DDX18 OS=Mus musculus OX=10090 GN=Ddx18 PE=1 SV=1	4		NaN	19.8507	19.5135	19.3985	19.2296	19.0798	4	4	7.9	97.0721	6	0	1	3	2	0	0
A2AKX3	Probable helicase senataxin	Setx	Probable helicase senataxin OS=Mus musculus OX=10090 GN=Setx PE=1 SV=1	4		17.4472	18.1231	17.0647	17.6518	18.7419	18.2871	4	4	1.9	107.316	2	0	0	0	0	1	1
O35345	Importin subunit alpha-7	Kpna6	Importin subunit alpha-7 OS=Mus musculus OX=10090 GN=Kpna6 PE=1 SV=2	3		19.0013	NaN	19.052	18.0875	19.3582	19.1801	3	3	9	94.6791	4	0	0	1	1	2	0
Q99PV0	Pre-mRNA-processing-splicing factor 8	Prpf8	Pre-mRNA-processing-splicing factor 8 OS=Mus musculus OX=10090 GN=Prpf8 PE=1 SV=2	15		19.9949	20.0255	19.4807	19.657	19.7582	19.5885	15	15	8.6	118.505	25	0	1	7	11	3	3
Q8VDP4	Cell cycle and apoptosis regulator protein 2	Ccar2	Cell cycle and apoptosis regulator protein 2 OS=Mus musculus OX=10090 GN=Ccar2 PE=1 SV=2	5		19.6404	19.3938	19.2409	18.8766	18.4534	18.5514	5	5	7	114.156	4	0	0	1	3	0	0
Q8VDJ3	Vigilin	Hdlbp	Vigilin OS=Mus musculus OX=10090 GN=Hdlbp PE=1 SV=1	2		NaN	18.1146	17.3957	17.8891	NaN	17.8923	2	2	2.4	71.2915	2	0	0	2	0	0	0
Q923G2	DNA-directed RNA polymerases I, II, and III subunit RPABC3	Polr2h	DNA-directed RNA polymerases I, II, and III subunit RPABC3 OS=Mus musculus OX=10090 GN=Polr2h PE=1 SV=3	2		19.6108	19.7764	19.1717	19.2229	20.5348	19.2273	2	2	19.3	117.544	6	1	1	1	1	2	0
Q99L45	Eukaryotic translation initiation factor 2 subunit 2	Eif2s2	Eukaryotic translation initiation factor 2 subunit 2 OS=Mus musculus OX=10090 GN=Eif2s2 PE=1 SV=1	4		19.686	19.5886	19.5263	18.7359	20.2882	20.2901	4	4	16	118.115	6	0	0	2	1	2	1
CON__P13645				22	+	24.9955	26.9895	25.5336	25.4274	26.7141	26.7323	22	19	41	156.392	62	2	9	15	9	15	12
Q9QWT9	Kinesin-like protein KIFC1	Kifc1	Kinesin-like protein KIFC1 OS=Mus musculus OX=10090 GN=Kifc1 PE=1 SV=2	2		18.9466	18.6307	18.3689	18.1563	NaN	19.166	2	2	3.7	93.2684	2	0	1	0	1	0	0
Q587J6	LINE-1 type transposase domain-containing protein 1	L1td1	LINE-1 type transposase domain-containing protein 1 OS=Mus musculus OX=10090 GN=L1td1 PE=2 SV=1	7		20.2955	20.2934	19.7958	19.7183	19.9409	20.0855	7	7	11.3	120.129	17	1	2	4	4	3	3
Q60972	Histone-binding protein RBBP4	Rbbp4	Histone-binding protein RBBP4 OS=Mus musculus OX=10090 GN=Rbbp4 PE=1 SV=5	3		18.543	19.3267	18.5985	18.1809	20.8089	19.7753	3	3	14.8	115.233	6	1	0	1	1	2	1
P35979	60S ribosomal protein L12	Rpl12	60S ribosomal protein L12 OS=Mus musculus OX=10090 GN=Rpl12 PE=1 SV=2	3		20.8864	21.1025	20.6395	20.247	20.7056	21.0912	3	3	24.2	124.672	8	1	0	2	1	3	1
Q9CYI4	Putative RNA-binding protein Luc7-like 1	Luc7l	Putative RNA-binding protein Luc7-like 1 OS=Mus musculus OX=10090 GN=Luc7l PE=1 SV=2	3		18.4342	18.5817	18.3154	17.5872	NaN	17.8811	3	3	9.4	90.7995	3	0	0	1	2	0	0
Q8BKC5	Importin-5	Ipo5	Importin-5 OS=Mus musculus OX=10090 GN=Ipo5 PE=1 SV=3	3		18.4042	18.3581	17.7798	17.8568	19.4749	19.5945	3	3	4	111.468	4	0	0	0	0	3	1
Q6ZQ38	Cullin-associated NEDD8-dissociated protein 1	Cand1	Cullin-associated NEDD8-dissociated protein 1 OS=Mus musculus OX=10090 GN=Cand1 PE=1 SV=2	2		18.6123	17.7992	NaN	17.6424	19.167	19.626	2	2	2.4	92.8469	2	0	0	0	0	1	1
E9Q5C9		Nolc1	Nucleolar and coiled-body phosphoprotein 1 OS=Mus musculus OX=10090 GN=Nolc1 PE=1 SV=1	2		18.4178	17.9755	17.2385	18.0252	18.212	18.4515	2	2	3.6	108.321	1	0	0	1	0	0	0
Q9EQ61	Pescadillo homolog	Pes1	Pescadillo homolog OS=Mus musculus OX=10090 GN=Pes1 PE=1 SV=1	2		18.4184	18.2378	18.0142	17.4938	18.2313	18.7404	2	2	4.5	109.136	2	0	0	1	1	0	0
Q6ZWX6	Eukaryotic translation initiation factor 2 subunit 1	Eif2s1	Eukaryotic translation initiation factor 2 subunit 1 OS=Mus musculus OX=10090 GN=Eif2s1 PE=1 SV=3	3		19.5626	19.5863	18.9186	19.0635	19.9742	20.0335	3	3	14.6	117.139	10	0	1	3	2	1	3
O35129	Prohibitin-2	Phb2	Prohibitin-2 OS=Mus musculus OX=10090 GN=Phb2 PE=1 SV=1	10		22.434	22.5319	21.9548	21.8427	22.1169	22.2637	10	10	42.1	133.144	42	3	5	10	9	6	9
Q9DAW6	U4/U6 small nuclear ribonucleoprotein Prp4	Prpf4	U4/U6 small nuclear ribonucleoprotein Prp4 OS=Mus musculus OX=10090 GN=Prpf4 PE=1 SV=1	2		18.6846	18.8765	18.438	17.9509	18.1101	18.3976	2	2	5.4	110.458	4	0	0	2	2	0	0
O35658	Complement component 1 Q subcomponent-binding protein, mitochondrial	C1qbp	Complement component 1 Q subcomponent-binding protein, mitochondrial OS=Mus musculus OX=10090 GN=C1qbp PE=1 SV=1	2		20.2959	NaN	19.9755	19.4385	19.235	19.3644	2	2	9.7	98.3092	4	1	1	1	1	0	0
P97302	Transcription regulator protein BACH1	Bach1	Transcription regulator protein BACH1 OS=Mus musculus OX=10090 GN=Bach1 PE=1 SV=1	2		26.1154	26.155	25.6739	25.3944	25.7265	25.5267	2	2	2.8	154.592	1	0	0	1	0	0	0
Q922Q4	Pyrroline-5-carboxylate reductase 2	Pycr2	Pyrroline-5-carboxylate reductase 2 OS=Mus musculus OX=10090 GN=Pycr2 PE=1 SV=1	3		19.7852	20.5162	19.7285	19.3587	20.0718	20.107	3	3	14.4	119.567	8	0	1	2	3	1	1
P28656	Nucleosome assembly protein 1-like 1	Nap1l1	Nucleosome assembly protein 1-like 1 OS=Mus musculus OX=10090 GN=Nap1l1 PE=1 SV=2	3		20.2272	19.7286	19.3709	19.3489	20.979	20.8217	3	3	11.8	120.476	3	0	0	1	0	1	1
Q8K019	Bcl-2-associated transcription factor 1	Bclaf1	Bcl-2-associated transcription factor 1 OS=Mus musculus OX=10090 GN=Bclaf1 PE=1 SV=2	5		20.3716	19.7017	19.6925	19.1354	20.0066	19.7067	5	5	7.4	118.614	3	0	0	1	2	0	0
P70698;P70303	CTP synthase 1;CTP synthase 2	Ctps1;Ctps2	CTP synthase 1 OS=Mus musculus OX=10090 GN=Ctps1 PE=1 SV=2;CTP synthase 2 OS=Mus musculus OX=10090 GN=Ctps2 PE=1 SV=1	2		18.048	18.0268	17.2117	17.6078	17.6638	18.543	2	2	4.4	107.101	2	0	0	0	1	0	1
Q9CWF2;Q7TMM9	Tubulin beta-2B chain;Tubulin beta-2A chain	Tubb2b;Tubb2a	Tubulin beta-2B chain OS=Mus musculus OX=10090 GN=Tubb2b PE=1 SV=1;Tubulin beta-2A chain OS=Mus musculus OX=10090 GN=Tubb2a PE=1 SV=1	4		19.8213	20.378	19.4761	19.4351	21.2787	21.0886	15	3	45.8	121.478	8	1	0	1	2	1	3
P63158	High mobility group protein B1	Hmgb1	High mobility group protein B1 OS=Mus musculus OX=10090 GN=Hmgb1 PE=1 SV=2	2		19.681	19.5921	18.9375	18.9884	20.004	20.0028	2	2	13.5	117.206	4	0	0	1	1	1	1
Q9ERK4	Exportin-2	Cse1l	Exportin-2 OS=Mus musculus OX=10090 GN=Cse1l PE=1 SV=1	2		16.7539	17.0269	16.1244	16.2998	19.8322	19.5604	2	2	3.2	105.598	3	0	0	0	0	2	1
P61222	ATP-binding cassette sub-family E member 1	Abce1	ATP-binding cassette sub-family E member 1 OS=Mus musculus OX=10090 GN=Abce1 PE=1 SV=1	3		19.4035	19.9911	18.9277	19.1024	19.8628	19.6177	3	3	7	116.905	7	0	1	1	3	2	0
Q9JMD0	BUB3-interacting and GLEBS motif-containing protein ZNF207	Znf207	BUB3-interacting and GLEBS motif-containing protein ZNF207 OS=Mus musculus OX=10090 GN=Znf207 PE=1 SV=1	2		19.397	19.3697	18.482	18.8786	18.7174	18.6214	2	2	5.1	113.466	8	1	2	2	2	0	1
O08810	116 kDa U5 small nuclear ribonucleoprotein component	Eftud2	116 kDa U5 small nuclear ribonucleoprotein component OS=Mus musculus OX=10090 GN=Eftud2 PE=1 SV=1	10		19.9108	19.5953	18.9307	19.1682	19.1267	19.2376	11	10	15.9	115.969	13	1	0	3	6	2	1
E9PVX6		Mki67	Proliferation marker protein Ki-67 OS=Mus musculus OX=10090 GN=Mki67 PE=1 SV=1	3		NaN	18.2047	17.5036	17.4543	20.1343	18.3346	3	3	1.5	91.6317	3	0	0	0	1	2	0
P11440	Cyclin-dependent kinase 1	Cdk1	Cyclin-dependent kinase 1 OS=Mus musculus OX=10090 GN=Cdk1 PE=1 SV=3	4		19.3184	19.1272	18.2588	18.7242	19.7301	19.6974	4	4	18.5	114.856	7	0	0	3	1	2	1
Q9WVA3	Mitotic checkpoint protein BUB3	Bub3	Mitotic checkpoint protein BUB3 OS=Mus musculus OX=10090 GN=Bub3 PE=1 SV=2	3		19.0107	19.0346	18.4134	18.1645	18.8595	18.9158	3	3	13.5	112.399	3	0	0	2	1	0	0
Q920B9	FACT complex subunit SPT16	Supt16h	FACT complex subunit SPT16 OS=Mus musculus OX=10090 GN=Supt16h PE=1 SV=2	6		NaN	19.0205	18.3236	18.2083	19.9668	19.8596	6	6	8.2	95.3787	2	0	0	0	0	1	1
Q9Z0N1;Q9Z0N2	Eukaryotic translation initiation factor 2 subunit 3, X-linked;Eukaryotic translation initiation factor 2 subunit 3, Y-linked	Eif2s3x;Eif2s3y	Eukaryotic translation initiation factor 2 subunit 3, X-linked OS=Mus musculus OX=10090 GN=Eif2s3x PE=1 SV=2;Eukaryotic translation initiation factor 2 subunit 3, Y-linked OS=Mus musculus OX=10090 GN=Eif2s3y PE=1 SV=2	8		20.8984	20.3895	19.8758	19.8453	20.8276	20.432	8	8	28.8	122.269	19	1	1	3	6	6	2
P11983	T-complex protein 1 subunit alpha	Tcp1	T-complex protein 1 subunit alpha OS=Mus musculus OX=10090 GN=Tcp1 PE=1 SV=3	12		22.2698	22.4745	21.7046	21.4587	22.265	22.3691	12	12	26.3	132.542	37	2	4	8	7	9	7
P51881	ADP/ATP translocase 2;ADP/ATP translocase 2, N-terminally processed	Slc25a5	ADP/ATP translocase 2 OS=Mus musculus OX=10090 GN=Slc25a5 PE=1 SV=3	11		23.4229	23.6671	22.7651	22.741	23.3491	23.4253	11	4	35.2	139.37	46	3	8	9	11	7	8
CON__P35908v2;CON__P35908			;	22	+	20.4804	22.3212	20.6349	20.5757	21.9149	22.0861	25	18	59.8	128.013	26	1	3	5	5	6	6
P14869	60S acidic ribosomal protein P0	Rplp0	60S acidic ribosomal protein P0 OS=Mus musculus OX=10090 GN=Rplp0 PE=1 SV=3	6		21.6863	21.2179	20.5387	20.7627	21.0367	21.3542	6	6	27.1	126.596	16	3	2	3	3	2	3
Q924C1	Exportin-5	Xpo5	Exportin-5 OS=Mus musculus OX=10090 GN=Xpo5 PE=1 SV=1	2		NaN	19.4887	18.68	NaN	19.8652	19.2535	2	2	2.9	77.2874	3	0	0	0	0	2	1
P48962	ADP/ATP translocase 1	Slc25a4	ADP/ATP translocase 1 OS=Mus musculus OX=10090 GN=Slc25a4 PE=1 SV=4	3		21.0891	21.0481	20.3025	20.2068	20.7404	21.0214	10	3	31.9	124.408	13	1	1	3	2	3	3
P60843	Eukaryotic initiation factor 4A-I	Eif4a1	Eukaryotic initiation factor 4A-I OS=Mus musculus OX=10090 GN=Eif4a1 PE=1 SV=1	12		22.3889	22.4205	21.6674	21.5087	22.7718	22.8421	12	11	36.5	133.599	44	6	5	9	7	8	9
P06151	L-lactate dehydrogenase A chain	Ldha	L-lactate dehydrogenase A chain OS=Mus musculus OX=10090 GN=Ldha PE=1 SV=3	2		19.2962	18.9431	18.376	18.2255	18.5772	18.7959	2	2	7.2	112.214	0	0	0	0	0	0	0
P10126;P62631	Elongation factor 1-alpha 1;Elongation factor 1-alpha 2	Eef1a1;Eef1a2	Elongation factor 1-alpha 1 OS=Mus musculus OX=10090 GN=Eef1a1 PE=1 SV=3;Elongation factor 1-alpha 2 OS=Mus musculus OX=10090 GN=Eef1a2 PE=1 SV=1	10		24.1173	24.1763	23.3429	23.3117	24.3063	24.5443	10	10	32	143.799	52	8	10	11	10	6	7
Q9R190;Q924K8;Q8K4B0	Metastasis-associated protein MTA2;Metastasis-associated protein MTA3;Metastasis-associated protein MTA1	Mta2;Mta3;Mta1	Metastasis-associated protein MTA2 OS=Mus musculus OX=10090 GN=Mta2 PE=1 SV=1;Metastasis-associated protein MTA3 OS=Mus musculus OX=10090 GN=Mta3 PE=1 SV=1;Metastasis-associated protein MTA1 OS=Mus musculus OX=10090 GN=Mta1 PE=1 SV=1	2		18.8501	18.811	17.8416	18.1755	19.0901	19.9339	2	2	3	112.702	3	0	0	0	0	1	2
Q64737	Trifunctional purine biosynthetic protein adenosine-3;Phosphoribosylamine--glycine ligase;Phosphoribosylformylglycinamidine cyclo-ligase;Phosphoribosylglycinamide formyltransferase	Gart	Trifunctional purine biosynthetic protein adenosine-3 OS=Mus musculus OX=10090 GN=Gart PE=1 SV=3	5		19.2497	19.8598	18.8188	18.6386	19.607	20.0951	5	5	7.6	116.269	15	1	2	2	2	3	5
Q61937	Nucleophosmin	Npm1	Nucleophosmin OS=Mus musculus OX=10090 GN=Npm1 PE=1 SV=1	8		23.0558	23.2066	22.3826	22.222	23.0717	23.1211	8	8	33.9	137.06	27	4	4	4	5	5	5
P80314	T-complex protein 1 subunit beta	Cct2	T-complex protein 1 subunit beta OS=Mus musculus OX=10090 GN=Cct2 PE=1 SV=4	3		20.0655	20.3298	18.9013	19.8213	20.4866	20.6111	3	3	9	120.216	9	1	2	1	1	2	2
Q9CSH3	Exosome complex exonuclease RRP44	Dis3	Exosome complex exonuclease RRP44 OS=Mus musculus OX=10090 GN=Dis3 PE=1 SV=4	5		20.2723	20.1817	19.79	18.9424	20.4144	20.6058	5	5	6.5	120.207	9	0	0	2	1	3	3
Q9D0F6	Replication factor C subunit 5	Rfc5	Replication factor C subunit 5 OS=Mus musculus OX=10090 GN=Rfc5 PE=1 SV=1	2		19.4348	19.5236	18.8782	18.3575	NaN	19.1042	2	2	11.2	95.2982	2	0	0	0	2	0	0
Q8BH74	Nuclear pore complex protein Nup107	Nup107	Nuclear pore complex protein Nup107 OS=Mus musculus OX=10090 GN=Nup107 PE=1 SV=1	3		NaN	18.0715	17.1161	17.2664	18.4939	18.5764	3	3	5.3	89.5243	4	0	0	2	2	0	0
CON__P02533				3	+	19.1955	19.8944	19.1832	18.1425	19.5771	19.6506	5	2	13.8	115.643	4	0	0	0	2	1	1
P24547	Inosine-5-monophosphate dehydrogenase 2	Impdh2	Inosine-5-monophosphate dehydrogenase 2 OS=Mus musculus OX=10090 GN=Impdh2 PE=1 SV=2	2		19.1454	18.7926	18.0655	NaN	18.4577	18.964	2	2	4.9	93.4252	2	0	1	0	0	0	1
Q9D0I9	Arginine--tRNA ligase, cytoplasmic	Rars	Arginine--tRNA ligase, cytoplasmic OS=Mus musculus OX=10090 GN=Rars1 PE=1 SV=2	2		18.2841	18.2811	17.8934	16.85	18.107	18.0295	2	2	3.5	107.445	1	0	0	0	1	0	0
Q8R429;O55143	Sarcoplasmic/endoplasmic reticulum calcium ATPase 1;Sarcoplasmic/endoplasmic reticulum calcium ATPase 2	Atp2a1;Atp2a2	Sarcoplasmic/endoplasmic reticulum calcium ATPase 1 OS=Mus musculus OX=10090 GN=Atp2a1 PE=1 SV=1;Sarcoplasmic/endoplasmic reticulum calcium ATPase 2 OS=Mus musculus OX=10090 GN=Atp2a2 PE=1 SV=2	2		19.0137	18.5989	17.8849	NaN	18.802	18.5893	2	2	2.8	92.8888	3	0	0	1	1	1	0
Q60848	Lymphocyte-specific helicase	Hells	Lymphocyte-specific helicase OS=Mus musculus OX=10090 GN=Hells PE=1 SV=2	5		19.4724	19.9583	18.6825	18.895	20.1526	20.3988	5	5	7.3	117.56	12	0	2	2	2	4	2
P16858	Glyceraldehyde-3-phosphate dehydrogenase	Gapdh	Glyceraldehyde-3-phosphate dehydrogenase OS=Mus musculus OX=10090 GN=Gapdh PE=1 SV=2	12		24.9564	24.7112	23.9097	23.8886	25.4093	25.5472	12	12	43.2	148.422	70	9	7	11	10	17	16
Q9CQN1	Heat shock protein 75 kDa, mitochondrial	Trap1	Heat shock protein 75 kDa, mitochondrial OS=Mus musculus OX=10090 GN=Trap1 PE=1 SV=1	4		19.7288	19.688	18.7346	18.7435	18.9217	19.4021	4	4	7.4	115.219	5	0	0	3	2	0	0
Q61881	DNA replication licensing factor MCM7	Mcm7	DNA replication licensing factor MCM7 OS=Mus musculus OX=10090 GN=Mcm7 PE=1 SV=1	14		21.0452	21.2332	20.2076	20.1299	21.4088	21.5809	14	14	29.5	125.606	46	3	5	8	9	11	10
P17182	Alpha-enolase	Eno1	Alpha-enolase OS=Mus musculus OX=10090 GN=Eno1 PE=1 SV=3	15		23.7269	23.5593	22.7457	22.5722	23.7558	23.8024	15	15	49.1	140.162	81	12	11	14	13	18	13
P23116	Eukaryotic translation initiation factor 3 subunit A	Eif3a	Eukaryotic translation initiation factor 3 subunit A OS=Mus musculus OX=10090 GN=Eif3a PE=1 SV=5	6		20.3358	20.0566	19.1785	19.174	20.1418	19.9559	6	6	5.8	118.843	10	2	0	2	3	2	1
Q922P9	Putative oxidoreductase GLYR1	Glyr1	Putative oxidoreductase GLYR1 OS=Mus musculus OX=10090 GN=Glyr1 PE=1 SV=1	2		19.2276	19.1022	18.3375	17.9419	19.3739	19.4788	2	2	4.4	113.462	3	0	0	0	1	1	1
Q61753	D-3-phosphoglycerate dehydrogenase	Phgdh	D-3-phosphoglycerate dehydrogenase OS=Mus musculus OX=10090 GN=Phgdh PE=1 SV=3	2		18.0583	17.972	16.9017	17.0749	19.0912	19.7897	2	2	4.3	108.888	2	0	0	0	0	1	1
P80316	T-complex protein 1 subunit epsilon	Cct5	T-complex protein 1 subunit epsilon OS=Mus musculus OX=10090 GN=Cct5 PE=1 SV=1	3		19.9758	20.0426	18.8827	19.059	20.7179	19.8744	3	3	10.4	118.552	5	0	0	2	1	2	0
Q60649	Caseinolytic peptidase B protein homolog	Clpb	Caseinolytic peptidase B protein homolog OS=Mus musculus OX=10090 GN=Clpb PE=1 SV=1	3		19.6157	19.355	18.4469	NaN	NaN	18.849	3	3	6.8	76.2666	0	0	0	0	0	0	0
Q52KI8	Serine/arginine repetitive matrix protein 1	Srrm1	Serine/arginine repetitive matrix protein 1 OS=Mus musculus OX=10090 GN=Srrm1 PE=1 SV=2	2		19.7049	19.157	18.5218	18.2628	18.4657	18.1256	2	2	2.6	112.238	2	0	0	1	1	0	0
P84089	Enhancer of rudimentary homolog	Erh	Enhancer of rudimentary homolog OS=Mus musculus OX=10090 GN=Erh PE=1 SV=1	2		22.1965	21.1604	20.7141	20.5476	20.8179	20.9095	2	2	21.2	126.346	5	1	0	1	1	1	1
P97311	DNA replication licensing factor MCM6	Mcm6	DNA replication licensing factor MCM6 OS=Mus musculus OX=10090 GN=Mcm6 PE=1 SV=1	9		20.4555	20.6386	19.4447	19.4676	20.9453	20.7301	9	9	13.9	121.682	18	1	3	2	4	5	3
Q9DCL9	Multifunctional protein ADE2;Phosphoribosylaminoimidazole-succinocarboxamide synthase;Phosphoribosylaminoimidazole carboxylase	Paics	Multifunctional protein ADE2 OS=Mus musculus OX=10090 GN=Paics PE=1 SV=4	2		18.6241	18.7237	17.5817	17.5728	19.152	19.7904	2	2	5.2	111.445	3	0	0	0	0	2	1
Q8BU30	Isoleucine--tRNA ligase, cytoplasmic	Iars	Isoleucine--tRNA ligase, cytoplasmic OS=Mus musculus OX=10090 GN=Iars1 PE=1 SV=2	3		19.048	19.5389	18.5525	17.8365	19.1558	19.3028	3	3	3.3	113.435	5	0	1	2	1	1	0
P84084;P84078;P61205;P61750;Q8BSL7	ADP-ribosylation factor 5;ADP-ribosylation factor 1;ADP-ribosylation factor 3;ADP-ribosylation factor 4;ADP-ribosylation factor 2	Arf5;Arf1;Arf3;Arf4;Arf2	ADP-ribosylation factor 5 OS=Mus musculus OX=10090 GN=Arf5 PE=1 SV=2;ADP-ribosylation factor 1 OS=Mus musculus OX=10090 GN=Arf1 PE=1 SV=2;ADP-ribosylation factor 3 OS=Mus musculus OX=10090 GN=Arf3 PE=2 SV=2;ADP-ribosylation factor 4 OS=Mus musculus OX=1009	2		19.9933	19.9995	18.7068	19.0374	19.7936	19.9281	2	2	11.7	117.459	6	0	1	2	2	0	1
P68040	Guanine nucleotide-binding protein subunit beta-2-like 1;Guanine nucleotide-binding protein subunit beta-2-like 1, N-terminally processed	Gnb2l1	Receptor of activated protein C kinase 1 OS=Mus musculus OX=10090 GN=Rack1 PE=1 SV=3	7		22.0177	21.7749	20.6334	20.9031	21.301	21.4226	7	7	24.6	128.053	25	2	5	4	6	4	4
P01631	Ig kappa chain V-II region 26-10		Ig kappa chain V-II region 26-10 OS=Mus musculus OX=10090 PE=1 SV=1	3		25.9371	26.1028	24.8221	24.9594	25.8545	25.8219	3	3	17.7	153.498	10	1	1	2	2	3	1
P49717	DNA replication licensing factor MCM4	Mcm4	DNA replication licensing factor MCM4 OS=Mus musculus OX=10090 GN=Mcm4 PE=1 SV=1	10		19.8131	20.5444	18.9471	19.1376	20.4287	19.9795	10	10	14	118.85	15	0	1	2	5	4	3
Q569Z6	Thyroid hormone receptor-associated protein 3	Thrap3	Thyroid hormone receptor-associated protein 3 OS=Mus musculus OX=10090 GN=Thrap3 PE=1 SV=1	8		20.1297	20.0029	18.7716	18.989	19.9203	19.781	8	8	10.3	117.595	5	0	1	1	2	1	0
Q03265	ATP synthase subunit alpha, mitochondrial	Atp5a1	ATP synthase subunit alpha, mitochondrial OS=Mus musculus OX=10090 GN=Atp5f1a PE=1 SV=1	17		23.5539	23.6286	22.4047	22.3843	22.9268	23.0915	17	17	43.8	137.99	73	11	14	14	13	11	10
Q01853	Transitional endoplasmic reticulum ATPase	Vcp	Transitional endoplasmic reticulum ATPase OS=Mus musculus OX=10090 GN=Vcp PE=1 SV=4	3		19.3801	19.2425	18.1138	NaN	19.5634	19.3361	3	3	5	95.636	3	0	1	0	0	1	1
Q60932	Voltage-dependent anion-selective channel protein 1	Vdac1	Voltage-dependent anion-selective channel protein 1 OS=Mus musculus OX=10090 GN=Vdac1 PE=1 SV=3	2		19.066	20.0065	18.3432	18.3174	19.475	19.1027	2	2	8.1	114.311	2	0	1	0	0	1	0
Q9CWR8	DNA (cytosine-5)-methyltransferase 3-like	Dnmt3l	DNA (cytosine-5)-methyltransferase 3-like OS=Mus musculus OX=10090 GN=Dnmt3l PE=1 SV=1	5		20.4037	20.1127	19.15	18.9525	20.7995	20.8554	5	5	13.8	120.274	10	0	0	2	1	5	2
P13439	Uridine 5-monophosphate synthase;Orotate phosphoribosyltransferase;Orotidine 5-phosphate decarboxylase	Umps	Uridine 5-monophosphate synthase OS=Mus musculus OX=10090 GN=Umps PE=1 SV=3	3		18.8013	19.5711	17.9102	18.0347	19.4473	18.7653	3	3	7.7	112.53	3	0	1	0	0	2	0
CON__P02769				27	+	30.4541	29.5014	28.7971	28.7125	29.2645	29.4502	27	23	35.7	176.18	395	79	63	69	63	60	61
P62962;CON__P02584	Profilin-1	Pfn1	Profilin-1 OS=Mus musculus OX=10090 GN=Pfn1 PE=1 SV=2;	4	+	19.8083	19.7018	18.5017	18.5619	20.2382	20.565	4	4	40	117.377	5	0	0	0	0	3	2
Q922D8	C-1-tetrahydrofolate synthase, cytoplasmic;Methylenetetrahydrofolate dehydrogenase;Methenyltetrahydrofolate cyclohydrolase;Formyltetrahydrofolate synthetase;C-1-tetrahydrofolate synthase, cytoplasmic, N-terminally processed	Mthfd1	C-1-tetrahydrofolate synthase, cytoplasmic OS=Mus musculus OX=10090 GN=Mthfd1 PE=1 SV=4	2		19.7699	20.0089	18.8154	18.5134	19.2804	20.0872	2	2	3	116.475	7	0	1	1	1	2	2
A2A432	Cullin-4B	Cul4b	Cullin-4B OS=Mus musculus OX=10090 GN=Cul4b PE=1 SV=1	4		19.886	20.2329	18.4116	19.2018	19.7334	21.4873	4	4	4.7	118.953	6	0	1	0	1	1	3
P47915	60S ribosomal protein L29	Rpl29	60S ribosomal protein L29 OS=Mus musculus OX=10090 GN=Rpl29 PE=1 SV=2	2		21.9527	22.2832	20.1893	21.5192	22.0451	22.2051	2	2	13.8	130.195	4	1	1	1	0	1	0
P97310	DNA replication licensing factor MCM2	Mcm2	DNA replication licensing factor MCM2 OS=Mus musculus OX=10090 GN=Mcm2 PE=1 SV=3	6		19.5849	20.1575	18.5492	18.6455	20.0988	20.271	6	6	8	117.307	15	0	2	2	2	4	5
Q6P4T2	U5 small nuclear ribonucleoprotein 200 kDa helicase	Snrnp200	U5 small nuclear ribonucleoprotein 200 kDa helicase OS=Mus musculus OX=10090 GN=Snrnp200 PE=1 SV=1	23		21.7305	21.3273	20.362	20.1245	20.7123	20.6563	23	23	15.3	124.913	53	6	6	13	11	8	9
P49718	DNA replication licensing factor MCM5	Mcm5	DNA replication licensing factor MCM5 OS=Mus musculus OX=10090 GN=Mcm5 PE=1 SV=2	17		24.7454	24.6935	23.4589	23.4012	24.9008	25.0777	17	17	33.7	146.278	48	6	9	5	8	13	7
Q8BK67	Protein RCC2	Rcc2	Protein RCC2 OS=Mus musculus OX=10090 GN=Rcc2 PE=1 SV=1	6		21.3692	21.1749	20.1282	19.823	20.5545	20.536	6	6	18.5	123.586	15	1	2	4	3	2	3
Q3TUF7	YEATS domain-containing protein 2	Yeats2	YEATS domain-containing protein 2 OS=Mus musculus OX=10090 GN=Yeats2 PE=1 SV=2	2		29.8794	29.6502	28.3973	28.5259	29.384	29.3662	2	2	2	175.203	1	0	0	1	0	0	0
Q9WUA3;P12382	ATP-dependent 6-phosphofructokinase, platelet type;ATP-dependent 6-phosphofructokinase, liver type	Pfkp;Pfkl	ATP-dependent 6-phosphofructokinase, platelet type OS=Mus musculus OX=10090 GN=Pfkp PE=1 SV=1;ATP-dependent 6-phosphofructokinase, liver type OS=Mus musculus OX=10090 GN=Pfkl PE=1 SV=4	2		18.8628	19.2309	17.499	17.9681	19.0065	19.0483	2	2	4.6	111.616	6	0	2	1	1	1	1
Q8VDD5	Myosin-9	Myh9	Myosin-9 OS=Mus musculus OX=10090 GN=Myh9 PE=1 SV=4	6		20.2797	20.0242	19.1065	18.5388	20.0982	19.9538	6	6	4.3	118.001	12	1	2	2	1	4	2
Q8BTI8	Serine/arginine repetitive matrix protein 2	Srrm2	Serine/arginine repetitive matrix protein 2 OS=Mus musculus OX=10090 GN=Srrm2 PE=1 SV=3	5		NaN	19.9044	18.6548	18.4505	19.0683	18.6211	5	5	3	94.6991	1	0	0	0	0	1	0
P23249	Putative helicase MOV-10	Mov10	Putative helicase MOV-10 OS=Mus musculus OX=10090 GN=Mov10 PE=1 SV=2	18		22.6204	21.9343	21.0263	20.8229	20.6694	20.9306	18	18	24.7	128.004	32	7	4	9	6	4	2
CON__P00761				6	+	32.8311	32.6402	31.3943	31.3633	32.2393	32.589	6	6	25.1	193.057	153	24	29	24	25	29	22
P63242;Q8BGY2	Eukaryotic translation initiation factor 5A-1;Eukaryotic translation initiation factor 5A-2	Eif5a;Eif5a2	Eukaryotic translation initiation factor 5A-1 OS=Mus musculus OX=10090 GN=Eif5a PE=1 SV=2;Eukaryotic translation initiation factor 5A-2 OS=Mus musculus OX=10090 GN=Eif5a2 PE=1 SV=3	2		22.1637	22.2573	20.9391	20.7645	22.3119	22.3514	2	2	22.7	130.788	17	2	3	3	3	3	3
O09106;P70288	Histone deacetylase 1;Histone deacetylase 2	Hdac1;Hdac2	Histone deacetylase 1 OS=Mus musculus OX=10090 GN=Hdac1 PE=1 SV=1;Histone deacetylase 2 OS=Mus musculus OX=10090 GN=Hdac2 PE=1 SV=1	3		19.6186	20.1786	18.4767	18.5761	20.5327	20.377	3	3	7.7	117.76	6	0	2	0	1	2	1
O35381;Q64G17	Acidic leucine-rich nuclear phosphoprotein 32 family member A;Putative acidic leucine-rich nuclear phosphoprotein 32 family member C	Anp32a;Anp32c	Acidic leucine-rich nuclear phosphoprotein 32 family member A OS=Mus musculus OX=10090 GN=Anp32a PE=1 SV=1;Putative acidic leucine-rich nuclear phosphoprotein 32 family member C OS=Mus musculus OX=10090 GN=Anp32c PE=2 SV=3	2		19.0858	19.7397	18.1336	17.946	20.0429	20.414	2	2	9.7	115.362	4	0	1	0	0	2	1
Q61539	Steroid hormone receptor ERR2	Esrrb	Steroid hormone receptor ERR2 OS=Mus musculus OX=10090 GN=Esrrb PE=1 SV=2	3		19.7172	20.7508	18.887	18.8329	20.5194	20.6298	3	3	10.2	119.337	6	1	2	0	0	2	1
P68373;P05213;P68368;Q9JJZ2	Tubulin alpha-1C chain;Tubulin alpha-1B chain;Tubulin alpha-4A chain;Tubulin alpha-8 chain	Tuba1c;Tuba1b;Tuba4a;Tuba8	Tubulin alpha-1C chain OS=Mus musculus OX=10090 GN=Tuba1c PE=1 SV=1;Tubulin alpha-1B chain OS=Mus musculus OX=10090 GN=Tuba1b PE=1 SV=2;Tubulin alpha-4A chain OS=Mus musculus OX=10090 GN=Tuba4a PE=1 SV=1;Tubulin alpha-8 chain OS=Mus musculus OX=10090 GN=Tu	13		24.623	24.386	23.1527	23.0869	24.5717	24.6916	13	1	41.2	144.512	77	10	11	17	15	13	11
P56546	C-terminal-binding protein 2	Ctbp2	C-terminal-binding protein 2 OS=Mus musculus OX=10090 GN=Ctbp2 PE=1 SV=2	5		20.8976	21.0818	19.6737	19.532	20.508	20.7751	5	5	14.8	122.468	16	1	2	3	3	3	4
B2RQC6	CAD protein;Glutamine-dependent carbamoyl-phosphate synthase;Aspartate carbamoyltransferase;Dihydroorotase	Cad	CAD protein OS=Mus musculus OX=10090 GN=Cad PE=1 SV=1	8		19.7522	19.9461	18.4953	18.4276	19.672	19.85	8	8	4.8	116.143	9	0	1	3	2	0	3
Q99JN2	Kelch-like protein 22	Klhl22	Kelch-like protein 22 OS=Mus musculus OX=10090 GN=Klhl22 PE=1 SV=1	6		20.2704	20.0908	18.7754	18.8034	19.9055	19.9559	6	6	11.8	117.801	3	0	0	0	1	1	1
P56480	ATP synthase subunit beta, mitochondrial	Atp5b	ATP synthase subunit beta, mitochondrial OS=Mus musculus OX=10090 GN=Atp5f1b PE=1 SV=2	8		20.9671	20.6871	19.4845	19.381	19.8304	20.2587	8	8	20.8	120.609	25	3	5	5	5	4	3
Q5SVQ0	Histone acetyltransferase KAT7	Kat7	Histone acetyltransferase KAT7 OS=Mus musculus OX=10090 GN=Kat7 PE=1 SV=1	3		19.1685	19.3192	17.8467	NaN	19.1522	19.4645	3	3	8	94.9511	5	0	1	1	0	2	1
P11103	Poly [ADP-ribose] polymerase 1	Parp1	Poly [ADP-ribose] polymerase 1 OS=Mus musculus OX=10090 GN=Parp1 PE=1 SV=3	15		21.2316	21.0508	19.7763	19.7013	21.1987	21.2404	15	15	21.4	124.199	27	3	2	4	6	6	6
P68372;Q9D6F9	Tubulin beta-4B chain;Tubulin beta-4A chain	Tubb4b;Tubb4a	Tubulin beta-4B chain OS=Mus musculus OX=10090 GN=Tubb4b PE=1 SV=1;Tubulin beta-4A chain OS=Mus musculus OX=10090 GN=Tubb4a PE=1 SV=3	3		21.1192	21.1325	19.9642	19.4815	21.1231	21.5078	15	2	44.5	124.328	11	2	2	1	1	3	2
P80318	T-complex protein 1 subunit gamma	Cct3	T-complex protein 1 subunit gamma OS=Mus musculus OX=10090 GN=Cct3 PE=1 SV=1	13		26.9875	26.968	25.6324	25.4789	26.3965	26.6308	13	13	29.2	158.094	47	5	7	11	9	7	8
Q9ERD7	Tubulin beta-3 chain	Tubb3	Tubulin beta-3 chain OS=Mus musculus OX=10090 GN=Tubb3 PE=1 SV=1	2		20.8274	20.2004	19.0997	19.0838	20.3519	19.9163	11	2	31.6	119.48	7	1	1	2	1	1	1
P17918	Proliferating cell nuclear antigen	Pcna	Proliferating cell nuclear antigen OS=Mus musculus OX=10090 GN=Pcna PE=1 SV=2	2		20.4353	NaN	19.2953	18.7254	19.4682	20.0563	2	2	12.3	97.9805	7	0	0	1	2	2	2
P11499	Heat shock protein HSP 90-beta	Hsp90ab1	Heat shock protein HSP 90-beta OS=Mus musculus OX=10090 GN=Hsp90ab1 PE=1 SV=3	16		22.7437	22.9084	21.4551	21.3455	23.1362	23.2151	26	16	43.6	134.804	61	6	9	10	10	12	14
P99024	Tubulin beta-5 chain	Tubb5	Tubulin beta-5 chain OS=Mus musculus OX=10090 GN=Tubb5 PE=1 SV=1	17		24.8825	24.8248	23.4876	23.3519	24.7742	25.0219	17	4	51.8	146.343	97	10	11	16	20	21	19
P42932	T-complex protein 1 subunit theta	Cct8	T-complex protein 1 subunit theta OS=Mus musculus OX=10090 GN=Cct8 PE=1 SV=3	14		21.1884	21.2311	19.7929	19.7587	20.9056	21.1265	14	14	31.2	124.003	40	6	6	6	9	7	6
CON__P02768-1				2	+	22.122	20.5272	19.7086	20.0203	19.8315	19.6977	6	2	8.4	121.907	6	1	1	1	1	1	1
P60710;P63260	Actin, cytoplasmic 1;Actin, cytoplasmic 1, N-terminally processed;Actin, cytoplasmic 2;Actin, cytoplasmic 2, N-terminally processed	Actb;Actg1	Actin, cytoplasmic 1 OS=Mus musculus OX=10090 GN=Actb PE=1 SV=1;Actin, cytoplasmic 2 OS=Mus musculus OX=10090 GN=Actg1 PE=1 SV=1	15		25.3573	25.3271	23.8197	23.9439	25.0668	25.1287	15	6	56	148.643	88	12	12	15	17	16	16
P63038	60 kDa heat shock protein, mitochondrial	Hspd1	60 kDa heat shock protein, mitochondrial OS=Mus musculus OX=10090 GN=Hspd1 PE=1 SV=1	9		20.835	20.7106	19.3466	19.2562	19.9682	20.1181	9	9	25.5	120.235	15	2	1	4	3	3	2
Q61171	Peroxiredoxin-2	Prdx2	Peroxiredoxin-2 OS=Mus musculus OX=10090 GN=Prdx2 PE=1 SV=3	2		20.6871	19.5507	NaN	18.6384	20.2335	19.2213	2	2	14.6	98.3309	2	1	0	0	0	1	0
P58252	Elongation factor 2	Eef2	Elongation factor 2 OS=Mus musculus OX=10090 GN=Eef2 PE=1 SV=2	14		21.4159	21.4213	19.904	19.9649	21.658	21.6643	14	13	23.4	126.028	38	3	4	6	8	10	7
Q91YQ5	Dolichyl-diphosphooligosaccharide--protein glycosyltransferase subunit 1	Rpn1	Dolichyl-diphosphooligosaccharide--protein glycosyltransferase subunit 1 OS=Mus musculus OX=10090 GN=Rpn1 PE=1 SV=1	3		19.6169	19.0833	17.7031	18.0149	18.7141	18.3111	3	3	6.7	111.443	6	3	0	0	2	1	0
Q08943	FACT complex subunit SSRP1	Ssrp1	FACT complex subunit SSRP1 OS=Mus musculus OX=10090 GN=Ssrp1 PE=1 SV=2	6		18.9235	19.8065	17.7368	17.947	19.9052	18.5451	6	6	10.3	112.864	3	0	1	0	0	1	1
Q9ERU9	E3 SUMO-protein ligase RanBP2	Ranbp2	E3 SUMO-protein ligase RanBP2 OS=Mus musculus OX=10090 GN=Ranbp2 PE=1 SV=2	2		18.1328	19.0028	17.0345	17.0529	NaN	17.9838	2	2	0.9	89.2068	2	0	2	0	0	0	0
P80317	T-complex protein 1 subunit zeta	Cct6a	T-complex protein 1 subunit zeta OS=Mus musculus OX=10090 GN=Cct6a PE=1 SV=3	12		21.8269	21.7682	20.3345	20.1825	21.4219	21.5423	12	12	32.4	127.076	32	4	4	4	8	7	5
O08756	3-hydroxyacyl-CoA dehydrogenase type-2	Hsd17b10	3-hydroxyacyl-CoA dehydrogenase type-2 OS=Mus musculus OX=10090 GN=Hsd17b10 PE=1 SV=4	2		18.8343	18.7927	17.1175	17.4181	17.9327	18.4491	2	2	12.3	108.544	2	0	0	1	1	0	0
P19096	Fatty acid synthase;[Acyl-carrier-protein] S-acetyltransferase;[Acyl-carrier-protein] S-malonyltransferase;3-oxoacyl-[acyl-carrier-protein] synthase;3-oxoacyl-[acyl-carrier-protein] reductase;3-hydroxyacyl-[acyl-carrier-protein] dehydratase;Enoyl-[acyl-carrier-protein] reductase;Oleoyl-[acyl-carrier-protein] hydrolase	Fasn	Fatty acid synthase OS=Mus musculus OX=10090 GN=Fasn PE=1 SV=2	8		19.7514	20.2469	18.2437	18.6041	19.9336	19.8269	8	8	4.9	116.607	15	0	4	0	2	4	5
Q8BX22	Sal-like protein 4	Sall4	Sal-like protein 4 OS=Mus musculus OX=10090 GN=Sall4 PE=1 SV=2	5		18.966	19.4195	17.5214	17.6996	19.457	19.6535	5	5	7.6	112.717	4	0	1	0	0	1	2
P14602	Heat shock protein beta-1	Hspb1	Heat shock protein beta-1 OS=Mus musculus OX=10090 GN=Hspb1 PE=1 SV=3	2		20.8131	19.9973	18.6413	18.8992	20.208	20.3435	2	2	12.4	118.902	4	0	1	1	0	2	0
Q01320	DNA topoisomerase 2-alpha	Top2a	DNA topoisomerase 2-alpha OS=Mus musculus OX=10090 GN=Top2a PE=1 SV=2	25		22.3872	22.3831	20.7167	20.774	22.049	22.0805	25	25	20.7	130.391	57	6	7	10	10	14	10
P17742	Peptidyl-prolyl cis-trans isomerase A;Peptidyl-prolyl cis-trans isomerase A, N-terminally processed	Ppia	Peptidyl-prolyl cis-trans isomerase A OS=Mus musculus OX=10090 GN=Ppia PE=1 SV=2	6		21.9164	21.9116	20.3818	20.1609	20.9425	21.1327	6	6	32.9	126.446	9	1	2	2	2	1	1
Q9CXW3	Calcyclin-binding protein	Cacybp	Calcyclin-binding protein OS=Mus musculus OX=10090 GN=Cacybp PE=1 SV=1	3		20.5249	20.2264	18.7322	18.7265	18.7074	19.4059	3	3	22.7	116.323	2	1	0	1	0	0	0
Q9WTM5	RuvB-like 2	Ruvbl2	RuvB-like 2 OS=Mus musculus OX=10090 GN=Ruvbl2 PE=1 SV=3	6		20.5311	20.5007	18.8443	18.8897	20.1294	20.3471	6	6	17.1	119.242	16	2	6	2	1	3	2
Q9CZN7	Serine hydroxymethyltransferase	Shmt2	Serine hydroxymethyltransferase, mitochondrial OS=Mus musculus OX=10090 GN=Shmt2 PE=1 SV=1	2		19.2734	19.5935	18.0635	17.5	17.4372	18.0178	2	2	6.3	109.886	2	0	1	1	0	0	0
P14733	Lamin-B1	Lmnb1	Lamin-B1 OS=Mus musculus OX=10090 GN=Lmnb1 PE=1 SV=3	4		20.5687	20.7554	18.8612	19.1565	19.6837	19.9708	4	4	8.2	118.996	9	2	2	1	2	1	1
Q9R0N0	Galactokinase	Galk1	Galactokinase OS=Mus musculus OX=10090 GN=Galk1 PE=1 SV=2	3		19.5694	19.3563	17.7293	17.8584	19.4267	19.764	3	3	9.2	113.704	4	0	1	0	0	1	2
Q80U70	Polycomb protein Suz12	Suz12	Polycomb protein Suz12 OS=Mus musculus OX=10090 GN=Suz12 PE=1 SV=2	2		18.9067	19.5201	17.5778	17.5008	18.3166	18.7497	2	2	2.7	110.572	1	0	0	1	0	0	0
P62984;P62983;P0CG49;P0CG50	Ubiquitin-60S ribosomal protein L40;Ubiquitin;60S ribosomal protein L40;Ubiquitin-40S ribosomal protein S27a;Ubiquitin;40S ribosomal protein S27a;Polyubiquitin-B;Ubiquitin;Polyubiquitin-C;Ubiquitin;Ubiquitin-related 1;Ubiquitin-related 2	Uba52;Rps27a;Ubb;Ubc	Ubiquitin-60S ribosomal protein L40 OS=Mus musculus OX=10090 GN=Uba52 PE=1 SV=2;Ubiquitin-40S ribosomal protein S27a OS=Mus musculus OX=10090 GN=Rps27a PE=1 SV=2;Polyubiquitin-B OS=Mus musculus OX=10090 GN=Ubb PE=2 SV=1;Polyubiquitin-C OS=Mus musculus OX=1	2		20.7673	20.9746	19.4335	18.874	20.0507	20.2726	2	2	19.5	120.373	4	0	2	0	0	1	1
P10711	Transcription elongation factor A protein 1	Tcea1	Transcription elongation factor A protein 1 OS=Mus musculus OX=10090 GN=Tcea1 PE=1 SV=2	2		20.6621	19.9271	18.8687	18.2474	19.1866	19.5688	2	2	9	116.461	2	1	1	0	0	0	0
F7BJB9		Morc3	MORC family CW-type zinc finger protein 3 OS=Mus musculus OX=10090 GN=Morc3 PE=1 SV=1	4		19.5759	20.0764	18.1921	17.9534	20.5814	20.475	4	4	6.4	116.854	4	0	1	0	0	2	1
Q8VEE4	Replication protein A 70 kDa DNA-binding subunit;Replication protein A 70 kDa DNA-binding subunit, N-terminally processed	Rpa1	Replication protein A 70 kDa DNA-binding subunit OS=Mus musculus OX=10090 GN=Rpa1 PE=1 SV=1	5		20.6471	20.673	18.8886	18.8944	20.5636	20.7739	5	5	11.4	120.441	10	1	1	2	2	2	2
P52480	Pyruvate kinase PKM	Pkm	Pyruvate kinase PKM OS=Mus musculus OX=10090 GN=Pkm PE=1 SV=4	21		22.9767	22.9389	21.2398	21.1141	23.4117	23.631	21	21	46	135.312	70	8	10	11	9	17	15
Q9D8N0	Elongation factor 1-gamma	Eef1g	Elongation factor 1-gamma OS=Mus musculus OX=10090 GN=Eef1g PE=1 SV=3	4		20.4135	19.1052	18.0496	17.9024	19.1256	20.7573	4	4	11.4	115.354	7	1	0	1	1	1	3
P62821	Ras-related protein Rab-1A	Rab1A	Ras-related protein Rab-1A OS=Mus musculus OX=10090 GN=Rab1A PE=1 SV=3	4		21.5803	21.5291	19.8873	19.6346	20.5465	20.6654	4	4	29.3	123.843	13	2	2	3	2	2	2
P43247	DNA mismatch repair protein Msh2	Msh2	DNA mismatch repair protein Msh2 OS=Mus musculus OX=10090 GN=Msh2 PE=1 SV=1	12		21.0485	20.4025	18.9896	18.8555	21.2291	21.2839	12	12	18.8	121.809	23	3	1	3	1	9	6
Q9CW03	Structural maintenance of chromosomes protein 3	Smc3	Structural maintenance of chromosomes protein 3 OS=Mus musculus OX=10090 GN=Smc3 PE=1 SV=2	3		20.8881	19.9552	18.5515	18.6841	19.8576	20.209	3	3	3.1	118.145	3	1	0	0	0	1	1
Q9CPP0	Nucleoplasmin-3	Npm3	Nucleoplasmin-3 OS=Mus musculus OX=10090 GN=Npm3 PE=1 SV=3	2		20.1995	19.1144	17.8682	17.7988	18.7656	19.2203	2	2	17.7	112.967	9	1	1	1	2	2	2
P67778	Prohibitin	Phb	Prohibitin OS=Mus musculus OX=10090 GN=Phb PE=1 SV=1	6		21.6682	21.5599	19.7893	19.7214	20.2233	20.0397	6	6	27.2	123.002	12	2	3	3	2	2	0
Q91VR5	ATP-dependent RNA helicase DDX1	Ddx1	ATP-dependent RNA helicase DDX1 OS=Mus musculus OX=10090 GN=Ddx1 PE=1 SV=1	8		23.1093	22.6035	21.0919	20.9011	19.5834	20.1425	8	8	17.6	127.432	26	4	6	8	6	0	2
Q6A4J8	Ubiquitin carboxyl-terminal hydrolase 7	Usp7	Ubiquitin carboxyl-terminal hydrolase 7 OS=Mus musculus OX=10090 GN=Usp7 PE=1 SV=1	6		20.7261	20.8724	18.8012	19.0754	20.5361	20.7208	6	6	8.6	120.732	6	1	1	0	1	2	1
P80315	T-complex protein 1 subunit delta	Cct4	T-complex protein 1 subunit delta OS=Mus musculus OX=10090 GN=Cct4 PE=1 SV=3	4		21.6803	21.734	19.9218	19.7652	21.1102	21.4164	4	4	10.4	125.628	14	4	2	3	2	1	2
Q9QXX4	Calcium-binding mitochondrial carrier protein Aralar2	Slc25a13	Calcium-binding mitochondrial carrier protein Aralar2 OS=Mus musculus OX=10090 GN=Slc25a13 PE=1 SV=1	2		NaN	19.6537	17.6895	17.8821	18.6424	18.6427	2	2	3.8	92.5106	4	0	0	1	2	1	0
P54071	Isocitrate dehydrogenase [NADP], mitochondrial	Idh2	Isocitrate dehydrogenase [NADP], mitochondrial OS=Mus musculus OX=10090 GN=Idh2 PE=1 SV=3	2		21.0335	20.8392	19.3363	18.7742	19.6033	20.1074	2	2	6	119.694	6	1	1	1	1	1	1
Q8CH25	SAFB-like transcription modulator	Sltm	SAFB-like transcription modulator OS=Mus musculus OX=10090 GN=Sltm PE=1 SV=1	4		20.2024	19.8585	17.2568	19.029	NaN	NaN	4	4	4.1	76.3467	0	0	0	0	0	0	0
P63017	Heat shock cognate 71 kDa protein	Hspa8	Heat shock cognate 71 kDa protein OS=Mus musculus OX=10090 GN=Hspa8 PE=1 SV=1	22		23.4477	23.3632	21.5292	21.4393	22.916	23.1229	22	17	40.4	135.818	99	17	15	19	14	18	16
P60122	RuvB-like 1	Ruvbl1	RuvB-like 1 OS=Mus musculus OX=10090 GN=Ruvbl1 PE=1 SV=1	10		21.9304	21.7144	19.834	19.8646	21.4271	21.3533	10	10	32.5	126.124	18	3	1	1	3	4	6
P54276	DNA mismatch repair protein Msh6	Msh6	DNA mismatch repair protein Msh6 OS=Mus musculus OX=10090 GN=Msh6 PE=1 SV=3	17		21.1625	21.1748	19.3006	19.0852	21.2057	21.5201	17	17	16.7	123.449	37	6	7	3	2	10	9
P23198;P83917	Chromobox protein homolog 3;Chromobox protein homolog 1	Cbx3;Cbx1	Chromobox protein homolog 3 OS=Mus musculus OX=10090 GN=Cbx3 PE=1 SV=2;Chromobox protein homolog 1 OS=Mus musculus OX=10090 GN=Cbx1 PE=1 SV=1	2		20.3255	20.3188	17.785	18.904	21.9213	20.9117	2	2	16.4	120.166	6	0	0	1	2	2	1
P50247	Adenosylhomocysteinase	Ahcy	Adenosylhomocysteinase OS=Mus musculus OX=10090 GN=Ahcy PE=1 SV=3	4		18.7425	20.1277	17.2524	17.6458	20.1083	20.1974	4	4	11.8	114.074	6	0	1	0	0	2	3
Q922B2	Aspartate--tRNA ligase, cytoplasmic	Dars	Aspartate--tRNA ligase, cytoplasmic OS=Mus musculus OX=10090 GN=Dars1 PE=1 SV=2	2		20.4445	20.6686	18.6044	18.5163	19.2014	19.7015	2	2	6.4	117.137	3	0	1	1	1	0	0
P18760	Cofilin-1	Cfl1	Cofilin-1 OS=Mus musculus OX=10090 GN=Cfl1 PE=1 SV=3	4		21.6047	21.4701	19.4992	19.534	20.9614	21.4235	4	4	32.5	124.493	9	0	2	1	2	1	3
Q3V0C5	Ubiquitin carboxyl-terminal hydrolase 48	Usp48	Ubiquitin carboxyl-terminal hydrolase 48 OS=Mus musculus OX=10090 GN=Usp48 PE=1 SV=2	2		19.2457	19.6614	17.0921	17.7233	19.6796	19.5511	2	2	3	112.953	4	0	1	1	0	2	0
P52293	Importin subunit alpha-1	Kpna2	Importin subunit alpha-1 OS=Mus musculus OX=10090 GN=Kpna2 PE=1 SV=2	7		22.8274	22.7031	20.2444	21.1789	21.9645	22.4706	7	7	19.8	131.389	24	4	4	3	5	3	5
Q8VC57	BTB/POZ domain-containing protein KCTD5	Kctd5	BTB/POZ domain-containing protein KCTD5 OS=Mus musculus OX=10090 GN=Kctd5 PE=1 SV=1	3		21.3486	21.999	19.7035	19.5288	21.1197	21.5214	3	3	20.9	125.221	3	0	1	0	0	1	1
Q68FD5	Clathrin heavy chain 1	Cltc	Clathrin heavy chain 1 OS=Mus musculus OX=10090 GN=Cltc PE=1 SV=3	4		18.9532	20.2351	17.5563	17.4513	18.2073	19.0255	4	4	3.6	111.429	2	0	1	0	0	0	1
Q91VI7	Ribonuclease inhibitor	Rnh1	Ribonuclease inhibitor OS=Mus musculus OX=10090 GN=Rnh1 PE=1 SV=1	2		NaN	19.1075	NaN	16.9927	19.5712	19.481	2	2	6.6	75.1524	2	0	0	0	0	1	1
P57776	Elongation factor 1-delta	Eef1d	Elongation factor 1-delta OS=Mus musculus OX=10090 GN=Eef1d PE=1 SV=3	4		20.8125	21.1839	18.663	19.0885	19.2597	20.3493	4	4	16.4	119.357	6	1	2	0	0	1	2
P01868;P01869	Ig gamma-1 chain C region secreted form;Ig gamma-1 chain C region, membrane-bound form	Ighg1	Ig gamma-1 chain C region secreted form OS=Mus musculus OX=10090 GN=Ighg1 PE=1 SV=1;Ig gamma-1 chain C region, membrane-bound form OS=Mus musculus OX=10090 GN=Ighg1 PE=1 SV=2	7		28.3252	28.5844	26.3935	26.218	27.0709	27.2758	7	7	26.2	163.868	70	12	15	11	12	10	10
P24270	Catalase	Cat	Catalase OS=Mus musculus OX=10090 GN=Cat PE=1 SV=4	6		21.155	20.6017	18.6644	18.7205	19.5983	19.7986	6	6	17.1	118.538	11	2	4	2	1	1	1
Q61316	Heat shock 70 kDa protein 4	Hspa4	Heat shock 70 kDa protein 4 OS=Mus musculus OX=10090 GN=Hspa4 PE=1 SV=1	2		18.8191	18.7523	16.5993	NaN	19.1426	19.7384	2	2	3.3	93.0516	2	0	0	0	0	1	1
O70251	Elongation factor 1-beta	Eef1b	Elongation factor 1-beta OS=Mus musculus OX=10090 GN=Eef1b PE=1 SV=5	2		19.5662	20.4343	17.8496	17.7747	18.8863	18.9608	2	2	12.4	113.472	1	0	1	0	0	0	0
P25206	DNA replication licensing factor MCM3	Mcm3	DNA replication licensing factor MCM3 OS=Mus musculus OX=10090 GN=Mcm3 PE=1 SV=2	10		20.9723	21.0585	18.9955	18.641	20.7425	20.8057	10	10	16	121.216	28	2	4	4	3	9	6
P01837	Ig kappa chain C region		Immunoglobulin kappa constant OS=Mus musculus OX=10090 GN=Igkc PE=1 SV=2	4		24.3363	24.0325	22.0073	21.9664	22.7408	22.7796	4	4	38.3	137.863	13	2	3	2	2	2	2
Q9ESZ8	General transcription factor II-I	Gtf2i	General transcription factor II-I OS=Mus musculus OX=10090 GN=Gtf2i PE=1 SV=3	10		20.794	21.0994	18.7212	18.773	19.9784	20.6054	10	10	16.2	119.971	11	2	1	0	1	3	4
Q6PDQ2	Chromodomain-helicase-DNA-binding protein 4	Chd4	Chromodomain-helicase-DNA-binding protein 4 OS=Mus musculus OX=10090 GN=Chd4 PE=1 SV=1	7		19.2608	19.7103	17.0761	17.487	19.7802	20.1363	7	7	6.8	113.451	13	0	3	1	1	3	5
O35685	Nuclear migration protein nudC	Nudc	Nuclear migration protein nudC OS=Mus musculus OX=10090 GN=Nudc PE=1 SV=1	11		22.2521	21.8268	19.8428	19.7395	21.1363	21.1604	11	11	37.3	125.958	19	5	5	1	2	2	4
P62259	14-3-3 protein epsilon	Ywhae	14-3-3 protein epsilon OS=Mus musculus OX=10090 GN=Ywhae PE=1 SV=1	5		21.3053	21.367	19.0504	19.1237	21.3011	20.9938	5	4	22	123.141	13	2	3	1	1	4	2
P20029	78 kDa glucose-regulated protein	Hspa5	Endoplasmic reticulum chaperone BiP OS=Mus musculus OX=10090 GN=Hspa5 PE=1 SV=3	11		21.3706	21.1448	19.0711	18.9323	20.1767	20.4103	13	11	25.3	121.106	29	4	9	5	1	3	7
P07901	Heat shock protein HSP 90-alpha	Hsp90aa1	Heat shock protein HSP 90-alpha OS=Mus musculus OX=10090 GN=Hsp90aa1 PE=1 SV=4	26		24.2029	24.3152	22.0022	21.9508	23.9873	24.1451	26	16	39.4	140.604	91	14	19	13	9	19	17
P38647	Stress-70 protein, mitochondrial	Hspa9	Stress-70 protein, mitochondrial OS=Mus musculus OX=10090 GN=Hspa9 PE=1 SV=3	19		24.2819	23.6955	21.6666	21.6495	22.7069	22.9832	19	19	36.1	136.984	86	13	17	15	14	17	10
Q62318	Transcription intermediary factor 1-beta	Trim28	Transcription intermediary factor 1-beta OS=Mus musculus OX=10090 GN=Trim28 PE=1 SV=3	23		24.1824	24.3336	21.911	21.9287	24.2249	24.3498	23	23	43.5	140.93	104	16	15	15	14	21	23
Q6PR54	Telomere-associated protein RIF1	Rif1	Telomere-associated protein RIF1 OS=Mus musculus OX=10090 GN=Rif1 PE=1 SV=2	6		19.516	20.7899	17.1784	18.2336	19.9784	20.6062	6	6	3.6	116.302	10	0	2	0	1	2	5
Q8CAQ8	MICOS complex subunit Mic60	Immt	MICOS complex subunit Mic60 OS=Mus musculus OX=10090 GN=Immt PE=1 SV=1	2		19.8714	19.7541	17.1429	17.5795	17.8285	18.1465	2	2	3.7	110.323	2	1	1	0	0	0	0
Q9DBY8	Nuclear valosin-containing protein-like	Nvl	Nuclear valosin-containing protein-like OS=Mus musculus OX=10090 GN=Nvl PE=1 SV=1	8		20.9971	20.5582	18.3969	18.2554	19.9011	19.7731	8	8	14.2	117.882	15	2	4	3	1	3	2
Q9ERG0	LIM domain and actin-binding protein 1	Lima1	LIM domain and actin-binding protein 1 OS=Mus musculus OX=10090 GN=Lima1 PE=1 SV=3	2		19.8602	19.6533	17.2722	NaN	18.092	17.8233	2	2	3.3	92.701	2	1	1	0	0	0	0
Q99JB2	Stomatin-like protein 2, mitochondrial	Stoml2	Stomatin-like protein 2, mitochondrial OS=Mus musculus OX=10090 GN=Stoml2 PE=1 SV=1	2		20.1473	19.4893	16.575	17.8043	18.2815	17.9863	2	2	8.2	110.284	4	1	1	0	1	1	0
P05064	Fructose-bisphosphate aldolase A	Aldoa	Fructose-bisphosphate aldolase A OS=Mus musculus OX=10090 GN=Aldoa PE=1 SV=2	3		20.6528	20.7099	17.8548	18.2396	20.2885	20.594	3	3	13.2	118.339	11	2	2	0	1	3	3
Q60953	Protein PML	Pml	Protein PML OS=Mus musculus OX=10090 GN=Pml PE=1 SV=3	4		19.6388	20.3955	17.5134	17.0826	19.0634	19.5779	4	4	6	113.272	7	1	4	0	0	1	1
Q02053	Ubiquitin-like modifier-activating enzyme 1	Uba1	Ubiquitin-like modifier-activating enzyme 1 OS=Mus musculus OX=10090 GN=Uba1 PE=1 SV=1	8		20.9952	20.9657	18.156	18.3443	20.2082	20.2336	8	8	12	118.903	6	1	2	0	0	2	1
P35700	Peroxiredoxin-1	Prdx1	Peroxiredoxin-1 OS=Mus musculus OX=10090 GN=Prdx1 PE=1 SV=1	5		22.2947	22.251	19.5067	19.4989	21.2018	21.2756	5	5	24.1	126.029	7	1	1	1	2	1	1
Q8BGQ7	Alanine--tRNA ligase, cytoplasmic	Aars	Alanine--tRNA ligase, cytoplasmic OS=Mus musculus OX=10090 GN=Aars1 PE=1 SV=1	7		20.1121	20.5775	17.3718	17.6572	20.4035	19.7744	7	7	10	115.896	10	1	4	0	0	3	2
Q99LF4	tRNA-splicing ligase RtcB homolog	Rtcb	RNA-splicing ligase RtcB homolog OS=Mus musculus OX=10090 GN=Rtcb PE=1 SV=1	8		23.226	24.1658	20.8433	20.8244	20.0661	19.1769	8	8	19.2	128.302	19	3	6	4	5	1	0
P70168	Importin subunit beta-1	Kpnb1	Importin subunit beta-1 OS=Mus musculus OX=10090 GN=Kpnb1 PE=1 SV=2	3		20.5888	20.3405	17.5624	17.5892	19.9333	19.8681	3	3	5.5	115.882	5	1	2	0	0	1	1
Q61029;Q61033	Lamina-associated polypeptide 2, isoforms beta/delta/epsilon/gamma;Lamina-associated polypeptide 2, isoforms alpha/zeta	Tmpo	Lamina-associated polypeptide 2, isoforms beta/delta/epsilon/gamma OS=Mus musculus OX=10090 GN=Tmpo PE=1 SV=4;Lamina-associated polypeptide 2, isoforms alpha/zeta OS=Mus musculus OX=10090 GN=Tmpo PE=1 SV=4	4		19.6023	20.827	17.0638	17.3931	18.0378	18.1517	4	4	11.5	111.076	6	2	4	0	0	0	0
Q6P5D8	Structural maintenance of chromosomes flexible hinge domain-containing protein 1	Smchd1	Structural maintenance of chromosomes flexible hinge domain-containing protein 1 OS=Mus musculus OX=10090 GN=Smchd1 PE=1 SV=2	2		19.7576	19.7966	16.6707	NaN	19.3891	18.5403	2	2	1.5	94.1544	3	0	2	0	0	1	0
P19157	Glutathione S-transferase P 1	Gstp1	Glutathione S-transferase P 1 OS=Mus musculus OX=10090 GN=Gstp1 PE=1 SV=2	6		22.5537	21.4991	18.7731	18.6656	20.346	20.5494	6	3	41.4	122.387	12	5	4	1	0	1	1
Q80VD1	Protein FAM98B	Fam98b	Protein FAM98B OS=Mus musculus OX=10090 GN=Fam98b PE=1 SV=1	5		22.877	23.7527	20.3018	19.5927	NaN	18.0959	5	5	14.7	104.62	13	3	5	2	3	0	0
Q91V92	ATP-citrate synthase	Acly	ATP-citrate synthase OS=Mus musculus OX=10090 GN=Acly PE=1 SV=1	2		21.0501	21.0324	17.462	17.6226	18.8523	19.6923	2	2	2.7	115.712	5	2	2	0	0	0	1
Q9CQE8	UPF0568 protein C14orf166 homolog		RNA transcription, translation and transport factor protein OS=Mus musculus OX=10090 GN=RTRAF PE=1 SV=1	6		23.0715	23.1125	18.6563	19.1091	18.6992	15.7575	6	6	31.1	118.406	14	3	4	4	3	0	0
Q61696;P17879	Heat shock 70 kDa protein 1A;Heat shock 70 kDa protein 1B	Hspa1a;Hspa1b	Heat shock 70 kDa protein 1A OS=Mus musculus OX=10090 GN=Hspa1a PE=1 SV=2;Heat shock 70 kDa protein 1B OS=Mus musculus OX=10090 GN=Hspa1b PE=1 SV=3	4		21.3465	20.2407	16.2994	NaN	17.1024	NaN	8	4	25.6	74.989	3	2	1	0	0	0	0
Q9Z2W0	Aspartyl aminopeptidase	Dnpep	Aspartyl aminopeptidase OS=Mus musculus OX=10090 GN=Dnpep PE=1 SV=2	8		22.4874	21.3776	17.5441	17.1489	NaN	18.5083	8	8	25.6	97.0662	7	4	3	0	0	0	0
P15105	Glutamine synthetase	Glul	Glutamine synthetase OS=Mus musculus OX=10090 GN=Glul PE=1 SV=6	2		21.0808	21.3026	15.677	NaN	NaN	15.0357	2	2	8	73.0961	3	2	1	0	0	0	0
CON__Q9U6Y5		GFP		8	+	26.2393	26.463	14.0304	13.7402	NaN	NaN	8	8	51.8	80.473	23	10	13	0	0	0	0

## Sheet: 5_hnrnpu_post_impute
Majority protein IDs	Protein names	Gene names	Fasta headers	Razor + unique peptides	Potential contaminant	Student's T-test Difference hnrnpU_eGFP	Student's T-test Difference hnrnpU∆RGG_eGFP	Student's T-test p-value hnrnpU_eGFP	Student's T-test p-value hnrnpU∆RGG_eGFP	Student's T-test p-value hnrnpU_hnrnpU∆RGG	Log2 LFQ intensity 5 eGFP R1	Log2 LFQ intensity 6 eGFP R2	Log2 LFQ intensity 9- hnrnpU R1	Log2 LFQ intensity 9- hnrnpU R2	Log2 LFQ intensity 10- hnrnpU∆RGG R1	Log2 LFQ intensity 10- hnrnpU∆RGG R2	Peptides	Unique peptides	Sequence coverage [%]	Summed Log2 LFQ Intensity	MS/MS count	MS/MS count 5	MS/MS count 6	MS/MS count 9-R1	MS/MS count 9-R2	MS/MS count 10-R1	MS/MS count 10-R2
Q64012	RNA-binding protein Raly	Raly	RNA-binding protein Raly OS=Mus musculus OX=10090 GN=Raly PE=1 SV=3	13		7.9717	0.798064	0.0375357	0.408954	0.0106284	15.4286	16.6239	24.1407	23.8551	16.8015	16.8471	13	13	40.1	113.697	23	0	0	11	12	0	0
Q8VEK3	Heterogeneous nuclear ribonucleoprotein U	Hnrnpu	Heterogeneous nuclear ribonucleoprotein U OS=Mus musculus OX=10090 GN=Hnrnpu PE=1 SV=1	27		7.43721	8.04205	0.00302328	0.0058715	0.0410658	21.1233	21.1264	28.598	28.5261	29.0925	29.2414	27	27	31	157.708	326	0	2	95	97	69	63
O89086	RNA-binding protein 3	Rbm3	RNA-binding protein 3 OS=Mus musculus OX=10090 GN=Rbm3 PE=1 SV=1	5		6.36642	1.6123	0.0251468	0.0489767	0.0271556	16.4255	15.8739	22.48	22.5522	17.5318	17.9921	5	5	34.6	112.856	11	0	0	6	5	0	0
Q9Z130	Heterogeneous nuclear ribonucleoprotein D-like	Hnrnpdl	Heterogeneous nuclear ribonucleoprotein D-like OS=Mus musculus OX=10090 GN=Hnrnpdl PE=1 SV=1	10		6.2111	-0.226551	0.0511817	0.747453	0.000267942	18.8081	17.727	24.4035	24.5538	18.1147	17.9673	10	9	27.6	121.574	16	0	0	7	9	0	0
Q8VHN8;Q6P3D0	Protein syndesmos;U8 snoRNA-decapping enzyme	Nudt16l1;Nudt16	Tudor-interacting repair regulator protein OS=Mus musculus OX=10090 GN=Nudt16l1 PE=1 SV=2;U8 snoRNA-decapping enzyme OS=Mus musculus OX=10090 GN=Nudt16 PE=1 SV=1	2		6.16224	6.65625	0.0123886	0.00800944	0.0657234	15.5534	16.0117	22.0243	21.8653	22.5387	22.3389	2	2	9.5	120.332	5	0	0	2	1	1	1
Q9CXY6	Interleukin enhancer-binding factor 2	Ilf2	Interleukin enhancer-binding factor 2 OS=Mus musculus OX=10090 GN=Ilf2 PE=1 SV=1	15		5.70743	-0.394567	0.0887689	0.710967	0.0309737	17.0442	18.6468	23.5443	23.5616	17.1525	17.7494	15	15	51.5	117.699	40	0	0	18	22	0	0
Q8C854	Myelin expression factor 2	Myef2	Myelin expression factor 2 OS=Mus musculus OX=10090 GN=Myef2 PE=1 SV=1	19		5.66534	0.452842	0.0140492	0.301918	0.00749324	17.565	17.5483	23.3506	23.0934	17.7767	18.2422	19	19	41.6	117.576	37	0	0	16	21	0	0
O88569	Heterogeneous nuclear ribonucleoproteins A2/B1	Hnrnpa2b1	Heterogeneous nuclear ribonucleoproteins A2/B1 OS=Mus musculus OX=10090 GN=Hnrnpa2b1 PE=1 SV=2	20		5.54951	0.314582	0.00559851	0.0791088	0.00124757	20.4307	20.5313	26.0276	26.0335	20.7803	20.8109	20	19	61.5	134.614	90	2	2	40	40	2	4
Q91WJ8	Far upstream element-binding protein 1	Fubp1	Far upstream element-binding protein 1 OS=Mus musculus OX=10090 GN=Fubp1 PE=1 SV=1	12		5.28182	0.110797	0.0136172	0.742005	0.00092888	18.7736	18.2612	23.6922	23.9063	18.7136	18.5429	13	12	29.3	121.89	20	0	0	9	11	0	0
Q9CQL4	39S ribosomal protein L20, mitochondrial	Mrpl20	39S ribosomal protein L20, mitochondrial OS=Mus musculus OX=10090 GN=Mrpl20 PE=1 SV=1	3		5.14472	-0.406703	0.0271572	0.648968	0.0218666	17.4172	16.1494	22.5022	21.3539	16.7657	15.9876	3	3	28.9	110.176	4	0	0	2	2	0	0
Q60668	Heterogeneous nuclear ribonucleoprotein D0	Hnrnpd	Heterogeneous nuclear ribonucleoprotein D0 OS=Mus musculus OX=10090 GN=Hnrnpd PE=1 SV=2	7		5.05557	0.518143	0.00129421	0.234336	0.0258126	20.7741	20.9308	25.9529	25.8631	21.1456	21.5956	8	7	19.4	136.262	21	1	1	10	9	0	0
P49312	Heterogeneous nuclear ribonucleoprotein A1;Heterogeneous nuclear ribonucleoprotein A1, N-terminally processed	Hnrnpa1	Heterogeneous nuclear ribonucleoprotein A1 OS=Mus musculus OX=10090 GN=Hnrnpa1 PE=1 SV=2	15		5.05224	0.320475	0.00231279	0.396498	0.0161448	22.1939	22.2812	27.3777	27.2018	22.7925	22.3235	16	14	58.1	144.171	80	2	5	33	29	6	5
Q8BG05	Heterogeneous nuclear ribonucleoprotein A3	Hnrnpa3	Heterogeneous nuclear ribonucleoprotein A3 OS=Mus musculus OX=10090 GN=Hnrnpa3 PE=1 SV=1	14		4.98647	0.204274	0.0140185	0.429651	0.0105425	21.3088	21.6244	26.4923	26.4139	21.5374	21.8044	15	14	34.3	139.181	93	3	5	39	34	7	5
Q8K2M0	39S ribosomal protein L38, mitochondrial	Mrpl38	39S ribosomal protein L38, mitochondrial OS=Mus musculus OX=10090 GN=Mrpl38 PE=1 SV=2	5		4.96143	1.305	0.093686	0.387566	0.0315128	14.4303	16.3706	20.019	20.7048	16.2269	17.1841	5	5	25	104.936	10	0	0	5	5	0	0
Q7TMK9	Heterogeneous nuclear ribonucleoprotein Q	Syncrip	Heterogeneous nuclear ribonucleoprotein Q OS=Mus musculus OX=10090 GN=Syncrip PE=1 SV=2	21		4.95959	0.931731	0.00850195	0.0976777	0.0301667	19.401	19.2578	24.2962	24.2817	20.0687	20.4535	21	21	40.4	127.759	59	0	0	28	29	1	1
Q9D773	39S ribosomal protein L2, mitochondrial	Mrpl2	39S ribosomal protein L2, mitochondrial OS=Mus musculus OX=10090 GN=Mrpl2 PE=1 SV=1	2		4.92924	-1.11905	0.0171683	0.26282	0.0473165	17.1121	16.4837	21.8721	21.5822	15.107	16.2507	2	2	14.1	108.408	6	0	0	3	3	0	0
Q8VDT9	39S ribosomal protein L50, mitochondrial	Mrpl50	39S ribosomal protein L50, mitochondrial OS=Mus musculus OX=10090 GN=Mrpl50 PE=1 SV=2	3		4.87609	-0.206521	0.0455271	0.723197	0.0414698	16.3305	17.0634	21.6118	21.5344	16.8406	16.1403	3	3	34	109.521	6	0	0	3	3	0	0
Q8R081	Heterogeneous nuclear ribonucleoprotein L	Hnrnpl	Heterogeneous nuclear ribonucleoprotein L OS=Mus musculus OX=10090 GN=Hnrnpl PE=1 SV=2	18		4.85086	-0.396636	0.031565	0.727515	0.10399	20.4429	20.9381	25.5598	25.5229	19.4279	21.1599	18	18	38.1	133.052	63	0	2	28	28	1	4
Q9Z204	Heterogeneous nuclear ribonucleoproteins C1/C2	Hnrnpc	Heterogeneous nuclear ribonucleoproteins C1/C2 OS=Mus musculus OX=10090 GN=Hnrnpc PE=1 SV=1	18		4.77385	0.228245	0.00341595	0.286711	0.0103349	21.4992	21.4941	26.2982	26.2428	21.6145	21.8353	18	18	50.8	138.984	66	1	1	29	29	2	4
O88532	Zinc finger RNA-binding protein	Zfr	Zinc finger RNA-binding protein OS=Mus musculus OX=10090 GN=Zfr PE=1 SV=2	12		4.73998	-0.32526	0.0236612	0.550144	0.00740341	16.2189	16.9874	21.5225	21.1637	16.3614	16.1944	12	12	17.1	108.448	16	0	0	8	8	0	0
Q9JII5	DAZ-associated protein 1	Dazap1	DAZ-associated protein 1 OS=Mus musculus OX=10090 GN=Dazap1 PE=1 SV=2	4		4.71709	0.583265	0.114819	0.628598	0.00104882	15.9941	17.7636	21.6889	21.503	17.3662	17.5581	4	4	17	111.874	5	0	0	3	2	0	0
Q00PI9	Heterogeneous nuclear ribonucleoprotein U-like protein 2	Hnrnpul2	Heterogeneous nuclear ribonucleoprotein U-like protein 2 OS=Mus musculus OX=10090 GN=Hnrnpul2 PE=1 SV=2	13		4.68275	-0.851284	0.106004	0.535204	0.0628594	18.5331	16.7521	22.1251	22.5256	16.0866	17.496	13	13	23	113.518	23	0	0	11	12	0	0
Q3U0V1	Far upstream element-binding protein 2	Khsrp	Far upstream element-binding protein 2 OS=Mus musculus OX=10090 GN=Khsrp PE=1 SV=2	16		4.59542	0.338515	0.0697538	0.660342	0.00219484	17.1573	18.3046	22.4395	22.2132	17.9952	18.1437	16	15	29.9	116.253	30	0	0	15	14	1	0
Q99N89	39S ribosomal protein L43, mitochondrial	Mrpl43	39S ribosomal protein L43, mitochondrial OS=Mus musculus OX=10090 GN=Mrpl43 PE=1 SV=1	5		4.45908	-0.101135	0.021279	0.945521	0.134913	16.3022	17.2337	21.5585	20.8956	17.8145	15.5191	5	5	29	109.324	8	0	0	4	4	0	0
Q9D1N9	39S ribosomal protein L21, mitochondrial	Mrpl21	39S ribosomal protein L21, mitochondrial OS=Mus musculus OX=10090 GN=Mrpl21 PE=1 SV=1	6		4.44571	0.183187	0.0550487	0.728677	0.000984184	16.8075	16.001	20.8933	20.8066	16.5196	16.6554	6	6	31.1	107.683	10	0	0	4	6	0	0
Q99020	Heterogeneous nuclear ribonucleoprotein A/B	Hnrnpab	Heterogeneous nuclear ribonucleoprotein A/B OS=Mus musculus OX=10090 GN=Hnrnpab PE=1 SV=1	9		4.40375	0.690362	0.00163655	0.042849	0.00335267	21.534	21.3384	25.9037	25.7762	22.018	22.2351	9	9	27	138.805	37	2	2	13	10	5	5
P70372	ELAV-like protein 1	Elavl1	ELAV-like protein 1 OS=Mus musculus OX=10090 GN=Elavl1 PE=1 SV=2	10		4.37579	-0.504568	0.0699532	0.501154	0.00264779	18.8072	19.8341	23.7655	23.6275	18.6964	18.9358	10	10	41.1	123.666	21	0	1	9	10	0	1
P61979	Heterogeneous nuclear ribonucleoprotein K	Hnrnpk	Heterogeneous nuclear ribonucleoprotein K OS=Mus musculus OX=10090 GN=Hnrnpk PE=1 SV=1	25		4.35657	0.563915	0.00489691	0.0253416	0.0137251	21.8077	21.9088	26.326	26.1037	22.3972	22.4472	25	25	52.5	140.991	105	3	2	44	41	7	8
Q9ER88	28S ribosomal protein S29, mitochondrial	Dap3	28S ribosomal protein S29, mitochondrial OS=Mus musculus OX=10090 GN=Dap3 PE=1 SV=1	7		4.31582	-0.375913	0.0846154	0.314016	0.0703417	16.7787	17.1268	20.581	21.956	16.7935	16.3601	7	7	24.6	109.596	12	0	0	4	8	0	0
P60824	Cold-inducible RNA-binding protein	Cirbp	Cold-inducible RNA-binding protein OS=Mus musculus OX=10090 GN=Cirbp PE=1 SV=1	5		4.30103	0.170681	0.013713	0.656928	0.0281616	16.5316	16.5342	20.9267	20.7411	16.4181	16.989	5	5	38.4	108.141	6	0	0	3	3	0	0
Q9Z1X4	Interleukin enhancer-binding factor 3	Ilf3	Interleukin enhancer-binding factor 3 OS=Mus musculus OX=10090 GN=Ilf3 PE=1 SV=2	22		4.28042	-0.728346	0.0102162	0.623232	0.135658	18.5622	18.3916	22.7725	22.7422	16.6643	18.8328	22	18	30.3	117.966	51	0	0	23	26	0	2
Q921F4	Heterogeneous nuclear ribonucleoprotein L-like	Hnrnpll	Heterogeneous nuclear ribonucleoprotein L-like OS=Mus musculus OX=10090 GN=Hnrnpll PE=1 SV=3	8		4.21813	0.662244	0.0931828	0.486815	0.0220154	17.1159	15.8137	20.601	20.7648	16.9051	17.3489	8	8	20.5	108.549	12	0	0	6	6	0	0
Q9CY73	39S ribosomal protein L44, mitochondrial	Mrpl44	39S ribosomal protein L44, mitochondrial OS=Mus musculus OX=10090 GN=Mrpl44 PE=1 SV=3	5		4.15267	-0.100876	0.0215342	0.803651	0.00477748	15.8924	16.5217	20.2129	20.5066	16.0232	16.1892	5	5	25.5	105.346	10	0	0	5	5	0	0
P61358	60S ribosomal protein L27	Rpl27	60S ribosomal protein L27 OS=Mus musculus OX=10090 GN=Rpl27 PE=1 SV=2	2		4.10198	4.3555	0.0156353	0.00299868	0.362267	16.2242	16.4822	20.4815	20.4289	20.8737	20.5438	2	2	15.4	115.034	4	1	0	1	1	1	0
O88291	DBIRD complex subunit ZNF326	Znf326	DBIRD complex subunit ZNF326 OS=Mus musculus OX=10090 GN=Znf326 PE=1 SV=1	7		4.09619	0.656468	0.112797	0.53982	0.000543575	15.2635	16.7537	20.1625	20.047	16.7178	16.6123	7	7	16.9	105.557	5	0	0	2	3	0	0
Q8C2Q3	RNA-binding protein 14	Rbm14	RNA-binding protein 14 OS=Mus musculus OX=10090 GN=Rbm14 PE=1 SV=1	15		4.09571	0.0478048	0.00514705	0.87734	0.00527435	17.3472	17.7306	21.8491	21.4201	17.3916	17.7818	15	15	28.8	113.521	26	0	0	15	11	0	0
Q9CR59	Growth arrest and DNA damage-inducible proteins-interacting protein 1	Gadd45gip1	Growth arrest and DNA damage-inducible proteins-interacting protein 1 OS=Mus musculus OX=10090 GN=Gadd45gip1 PE=1 SV=1	2		4.0252	0.338976	0.226237	0.859726	0.0211322	17.908	14.8812	20.5656	20.274	16.7596	16.7076	2	2	8.6	107.096	4	0	0	2	2	0	0
Q9CXW2	28S ribosomal protein S22, mitochondrial	Mrps22	28S ribosomal protein S22, mitochondrial OS=Mus musculus OX=10090 GN=Mrps22 PE=1 SV=1	8		3.99539	-0.0902996	0.00665559	0.685874	0.016949	16.7549	16.7676	20.7086	20.8047	16.503	16.8389	8	8	29.5	108.378	9	0	0	4	5	0	0
P84104	Serine/arginine-rich splicing factor 3	Srsf3	Serine/arginine-rich splicing factor 3 OS=Mus musculus OX=10090 GN=Srsf3 PE=1 SV=1	5		3.98333	1.27935	0.144115	0.414087	0.010765	19.769	17.8083	22.5948	22.9492	19.9546	20.1814	5	4	31.7	123.257	8	0	0	3	5	0	0
Q8VC52	RNA-binding protein with multiple splicing 2	Rbpms2	RNA-binding protein with multiple splicing 2 OS=Mus musculus OX=10090 GN=Rbpms2 PE=1 SV=1	6		3.97465	0.915283	0.0177775	0.180797	0.0263475	16.5217	17.0145	20.3785	21.1071	17.3325	18.0342	6	4	35.9	110.389	4	0	0	1	3	0	0
O35737	Heterogeneous nuclear ribonucleoprotein H;Heterogeneous nuclear ribonucleoprotein H, N-terminally processed	Hnrnph1	Heterogeneous nuclear ribonucleoprotein H OS=Mus musculus OX=10090 GN=Hnrnph1 PE=1 SV=3	15		3.96389	0.140912	0.0489409	0.732532	0.00299965	21.3523	20.7222	25.0284	24.9739	21.115	21.2413	15	9	46.1	134.433	61	2	2	22	25	5	5
Q91VM5;Q9WV02	RNA binding motif protein, X-linked-like-1;RNA-binding motif protein, X chromosome;RNA-binding motif protein, X chromosome, N-terminally processed	Rbmxl1;Rbmx	RNA binding motif protein, X-linked-like-1 OS=Mus musculus OX=10090 GN=Rbmxl1 PE=2 SV=1;RNA-binding motif protein, X chromosome OS=Mus musculus OX=10090 GN=Rbmx PE=1 SV=1	14		3.83994	-0.0230341	0.101574	0.976581	0.0301923	19.3308	20.5667	23.7859	23.7915	20.1093	19.7422	14	14	36.6	127.326	27	0	2	11	13	1	0
Q9CPR5	39S ribosomal protein L15, mitochondrial	Mrpl15	39S ribosomal protein L15, mitochondrial OS=Mus musculus OX=10090 GN=Mrpl15 PE=1 SV=1	5		3.82007	-0.709861	0.109887	0.482546	0.0627082	17.2478	15.9114	20.4229	20.3764	15.4176	16.3218	5	5	22.4	105.698	9	0	0	4	5	0	0
Q8BK72	28S ribosomal protein S27, mitochondrial	Mrps27	28S ribosomal protein S27, mitochondrial OS=Mus musculus OX=10090 GN=Mrps27 PE=1 SV=2	5		3.81954	-0.0105543	0.0278084	0.98191	0.0197114	16.4483	16.8962	20.893	20.0906	16.9998	16.3236	5	5	21.4	107.652	7	0	0	4	3	0	0
O70133	ATP-dependent RNA helicase A	Dhx9	ATP-dependent RNA helicase A OS=Mus musculus OX=10090 GN=Dhx9 PE=1 SV=2	41		3.72284	-0.0470219	0.0102605	0.774551	0.00570856	20.4392	20.6613	24.309	24.2371	20.4133	20.5931	41	41	37.2	130.653	102	2	0	46	46	5	3
P11404	Fatty acid-binding protein, heart	Fabp3	Fatty acid-binding protein, heart OS=Mus musculus OX=10090 GN=Fabp3 PE=1 SV=5	2		3.71259	4.37653	0.171823	0.143325	0.0922468	18.3488	16.292	21.0065	21.0595	21.5847	21.8092	2	2	18	120.101	0	0	0	0	0	0	0
Q9DBR0	A-kinase anchor protein 8	Akap8	A-kinase anchor protein 8 OS=Mus musculus OX=10090 GN=Akap8 PE=1 SV=1	5		3.69992	0.0290194	0.0180013	0.925397	0.0272564	17.0079	16.665	20.5901	20.4826	16.6531	17.0778	5	5	11.1	108.476	8	0	0	4	4	0	0
Q60749	KH domain-containing, RNA-binding, signal transduction-associated protein 1	Khdrbs1	KH domain-containing, RNA-binding, signal transduction-associated protein 1 OS=Mus musculus OX=10090 GN=Khdrbs1 PE=1 SV=2	4		3.66553	0.622462	0.015473	0.114558	0.00286206	18.8468	18.8189	22.599	22.3978	19.5727	19.3379	4	4	19	121.573	9	0	0	5	3	1	0
Q91WM1	Spermatid perinuclear RNA-binding protein	Strbp	Spermatid perinuclear RNA-binding protein OS=Mus musculus OX=10090 GN=Strbp PE=1 SV=1	4		3.64976	1.81841	0.0759127	0.180481	0.22485	16.4439	15.4472	19.6981	19.4925	17.0684	18.4594	8	4	11.9	106.61	6	0	0	4	2	0	0
Q9R0L7	A-kinase anchor protein 8-like	Akap8l	A-kinase anchor protein 8-like OS=Mus musculus OX=10090 GN=Akap8l PE=1 SV=1	2		3.62885	-0.864053	0.0464889	0.190228	0.000581823	17.1872	16.6269	20.5043	20.5675	15.9924	16.0935	2	2	4	106.972	3	0	0	2	1	0	0
Q9DCU6	39S ribosomal protein L4, mitochondrial	Mrpl4	39S ribosomal protein L4, mitochondrial OS=Mus musculus OX=10090 GN=Mrpl4 PE=1 SV=1	7		3.56441	-1.29369	0.173037	0.449345	0.119028	16.4027	18.6915	22.3759	19.8471	16.8262	15.6806	7	7	30.6	109.824	11	0	0	7	4	0	0
Q8VE22	28S ribosomal protein S23, mitochondrial	Mrps23	28S ribosomal protein S23, mitochondrial OS=Mus musculus OX=10090 GN=Mrps23 PE=1 SV=1	4		3.48615	-0.00698328	0.0999613	0.995432	0.159314	15.8409	16.9629	19.9306	19.8455	17.2919	15.498	4	4	29.9	105.37	7	0	0	3	4	0	0
Q6PB66	Leucine-rich PPR motif-containing protein, mitochondrial	Lrpprc	Leucine-rich PPR motif-containing protein, mitochondrial OS=Mus musculus OX=10090 GN=Lrpprc PE=1 SV=2	20		3.48108	0.103323	0.0837758	0.931949	0.142387	17.3729	16.1453	20.4517	20.0286	17.7243	16.0005	20	20	19.2	107.723	15	0	0	10	5	0	0
Q99N94	39S ribosomal protein L9, mitochondrial	Mrpl9	39S ribosomal protein L9, mitochondrial OS=Mus musculus OX=10090 GN=Mrpl9 PE=1 SV=2	4		3.47368	1.21892	0.0635257	0.186471	0.175322	15.2767	16.014	19.7568	18.4812	16.8493	16.8792	4	4	19.2	103.257	6	0	0	4	2	0	0
Q9CX86	Heterogeneous nuclear ribonucleoprotein A0	Hnrnpa0	Heterogeneous nuclear ribonucleoprotein A0 OS=Mus musculus OX=10090 GN=Hnrnpa0 PE=1 SV=1	5		3.45874	-0.055769	0.00587702	0.920268	0.0708048	21.0387	21.315	24.7145	24.5567	20.6843	21.5578	5	5	21.6	133.867	24	0	3	8	9	2	2
Q9Z2X1	Heterogeneous nuclear ribonucleoprotein F;Heterogeneous nuclear ribonucleoprotein F, N-terminally processed	Hnrnpf	Heterogeneous nuclear ribonucleoprotein F OS=Mus musculus OX=10090 GN=Hnrnpf PE=1 SV=3	10		3.42131	-0.0764589	0.0403237	0.790454	0.00190771	22.2471	21.8005	25.4628	25.4274	21.9062	21.9885	12	10	46	138.832	41	3	2	13	16	3	4
Q8R326	Paraspeckle component 1	Pspc1	Paraspeckle component 1 OS=Mus musculus OX=10090 GN=Pspc1 PE=1 SV=1	4		3.40549	2.33547	0.0370221	0.0828811	0.120931	16.2131	16.1647	19.8052	19.3836	18.2127	18.8361	4	4	11.5	108.615	4	0	0	2	2	0	0
P70333	Heterogeneous nuclear ribonucleoprotein H2	Hnrnph2	Heterogeneous nuclear ribonucleoprotein H2 OS=Mus musculus OX=10090 GN=Hnrnph2 PE=1 SV=1	3		3.29938	-0.639488	0.144097	0.551137	0.047243	16.641	18.1627	20.6824	20.72	17.0602	16.4645	8	3	24.7	109.731	4	0	0	2	2	0	0
Q3TBW2	39S ribosomal protein L10, mitochondrial	Mrpl10	39S ribosomal protein L10, mitochondrial OS=Mus musculus OX=10090 GN=Mrpl10 PE=1 SV=2	4		3.23151	0.666958	0.0685476	0.487712	0.156686	16.0338	16.7748	19.6842	19.5875	17.7228	16.4198	4	4	29	106.223	6	0	0	4	2	0	0
Q921F2	TAR DNA-binding protein 43	Tardbp	TAR DNA-binding protein 43 OS=Mus musculus OX=10090 GN=Tardbp PE=1 SV=1	10		3.1787	0.35525	0.00404962	0.152968	0.00858485	20.0841	20.2609	23.3975	23.3048	20.5354	20.5201	10	10	29.2	128.103	28	0	0	10	12	2	4
Q9CQL5	39S ribosomal protein L18, mitochondrial	Mrpl18	39S ribosomal protein L18, mitochondrial OS=Mus musculus OX=10090 GN=Mrpl18 PE=1 SV=1	2		3.11826	-0.409504	0.0562038	0.611579	0.104093	16.9581	16.4055	19.7955	19.8046	16.8544	15.6902	2	2	11.7	105.508	3	0	0	2	1	0	0
Q501J6	Probable ATP-dependent RNA helicase DDX17	Ddx17	Probable ATP-dependent RNA helicase DDX17 OS=Mus musculus OX=10090 GN=Ddx17 PE=1 SV=1	13		3.04427	0.128055	0.0148293	0.793241	0.0687989	19.2076	18.8584	22.1577	21.9969	18.7925	19.5296	17	13	31.4	120.543	31	0	0	14	15	0	2
O35972	39S ribosomal protein L23, mitochondrial	Mrpl23	39S ribosomal protein L23, mitochondrial OS=Mus musculus OX=10090 GN=Mrpl23 PE=1 SV=1	3		2.98369	-0.484662	0.0578429	0.612701	0.0757678	16.7334	16.4809	19.2108	19.9708	15.4243	16.8206	3	3	29.5	104.641	9	0	0	4	5	0	0
Q8K310	Matrin-3	Matr3	Matrin-3 OS=Mus musculus OX=10090 GN=Matr3 PE=1 SV=1	26		2.96975	-0.293409	0.0284184	0.445051	0.0492921	20.2462	19.9694	23.09	23.0651	19.5587	20.0701	26	26	43.3	126	54	0	1	27	23	2	1
Q99N92	39S ribosomal protein L27, mitochondrial	Mrpl27	39S ribosomal protein L27, mitochondrial OS=Mus musculus OX=10090 GN=Mrpl27 PE=1 SV=1	3		2.95508	-0.187992	0.0151517	0.662139	0.031377	16.7833	17.22	20.0838	19.8297	16.5202	17.1071	3	3	24.3	107.544	4	0	0	3	1	0	0
Q8CCS6	Polyadenylate-binding protein 2	Pabpn1	Polyadenylate-binding protein 2 OS=Mus musculus OX=10090 GN=Pabpn1 PE=1 SV=3	5		2.93687	-0.786965	0.139091	0.47538	0.0167794	17.0177	18.519	20.9111	20.4994	17.3007	16.6621	5	5	29.8	110.91	6	0	0	3	3	0	0
Q8BP71;Q9JJ43	RNA binding protein fox-1 homolog 2;RNA binding protein fox-1 homolog 1	Rbfox2;Rbfox1	RNA binding protein fox-1 homolog 2 OS=Mus musculus OX=10090 GN=Rbfox2 PE=1 SV=2;RNA binding protein fox-1 homolog 1 OS=Mus musculus OX=10090 GN=Rbfox1 PE=1 SV=3	3		2.92821	0.795868	0.119693	0.370959	0.0992256	15.8615	16.9839	19.3811	19.3208	16.876	17.5611	3	3	11.1	105.985	1	0	0	0	1	0	0
Q924T2	28S ribosomal protein S2, mitochondrial	Mrps2	28S ribosomal protein S2, mitochondrial OS=Mus musculus OX=10090 GN=Mrps2 PE=1 SV=1	3		2.89802	-0.532297	0.0250395	0.432002	0.0592967	16.6849	16.1382	19.1644	19.4548	15.4362	16.3224	3	3	17.2	103.201	6	0	0	3	3	0	0
Q9EQI8	39S ribosomal protein L46, mitochondrial	Mrpl46	39S ribosomal protein L46, mitochondrial OS=Mus musculus OX=10090 GN=Mrpl46 PE=1 SV=1	3		2.88023	0.784242	0.163076	0.503993	0.114569	17.2056	15.6059	19.1429	19.4291	17.6543	16.7258	3	3	15.5	105.764	5	0	0	2	3	0	0
Q9CQT2	RNA-binding protein 7	Rbm7	RNA-binding protein 7 OS=Mus musculus OX=10090 GN=Rbm7 PE=1 SV=1	2		2.86899	0.221238	0.117515	0.7788	0.0115237	16.8083	15.5983	18.9316	19.213	16.228	16.6211	2	2	19.6	103.4	3	0	0	2	1	0	0
Q9R0U0	Serine/arginine-rich splicing factor 10	Srsf10	Serine/arginine-rich splicing factor 10 OS=Mus musculus OX=10090 GN=Srsf10 PE=1 SV=2	6		2.86777	0.128244	0.0819513	0.809874	0.0176688	17.456	18.2713	20.6596	20.8032	17.8253	18.1584	6	6	23.7	113.174	11	0	0	4	6	1	0
Q9D7N3	28S ribosomal protein S9, mitochondrial	Mrps9	28S ribosomal protein S9, mitochondrial OS=Mus musculus OX=10090 GN=Mrps9 PE=1 SV=3	7		2.85296	-0.408858	0.219663	0.766212	0.00508741	16.1318	18.2558	20.216	19.8776	16.9301	16.6398	7	7	24.9	108.051	10	0	0	6	4	0	0
Q91VR2	ATP synthase subunit gamma, mitochondrial	Atp5c1	ATP synthase subunit gamma, mitochondrial OS=Mus musculus OX=10090 GN=Atp5f1c PE=1 SV=1	4		2.82707	3.67722	0.533993	0.450388	0.0803514	17.3168	23.6095	23.3042	23.2763	24.0272	24.2536	4	4	14.4	135.788	14	1	0	4	4	3	2
Q8K3Y3	Protein lin-28 homolog A	Lin28a	Protein lin-28 homolog A OS=Mus musculus OX=10090 GN=Lin28a PE=1 SV=1	3		2.82399	1.30093	0.149194	0.296766	0.0449808	17.8678	16.4785	19.9137	20.0806	18.2855	18.6626	3	3	23.9	111.289	6	0	0	3	3	0	0
Q61656	Probable ATP-dependent RNA helicase DDX5	Ddx5	Probable ATP-dependent RNA helicase DDX5 OS=Mus musculus OX=10090 GN=Ddx5 PE=1 SV=2	27		2.82076	0.0626106	0.00661085	0.595163	0.00882815	21.8838	22.0178	24.796	24.7471	21.9394	22.0874	27	23	46.1	137.472	86	3	6	32	31	7	7
P28659	CUGBP Elav-like family member 1	Celf1	CUGBP Elav-like family member 1 OS=Mus musculus OX=10090 GN=Celf1 PE=1 SV=2	2		2.82069	-0.0718956	0.202607	0.952464	0.00472156	15.7856	17.7049	19.7051	19.4267	16.5647	16.7819	2	2	6.2	105.969	4	0	0	2	2	0	0
Q9CQN7	39S ribosomal protein L41, mitochondrial	Mrpl41	39S ribosomal protein L41, mitochondrial OS=Mus musculus OX=10090 GN=Mrpl41 PE=1 SV=1	2		2.77764	-0.142864	0.242349	0.920279	0.0279574	18.2394	15.9846	20.0076	19.7717	17.2293	16.709	2	2	17.8	107.942	3	0	0	2	1	0	0
Q9CY16	28S ribosomal protein S28, mitochondrial	Mrps28	28S ribosomal protein S28, mitochondrial OS=Mus musculus OX=10090 GN=Mrps28 PE=1 SV=1	2		2.76226	-0.809524	0.168522	0.470698	0.0642605	18.0205	16.5029	19.9604	20.0874	16.8481	16.0562	2	2	12.9	107.476	3	0	0	1	2	0	0
Q9D0L8	mRNA cap guanine-N7 methyltransferase	Rnmt	mRNA cap guanine-N7 methyltransferase OS=Mus musculus OX=10090 GN=Rnmt PE=1 SV=1	4		2.75443	0.233757	0.194132	0.857215	0.173847	16.3178	18.0797	19.8663	20.0401	16.7079	18.1571	4	4	13.3	109.169	6	0	0	3	3	0	0
Q9JIF0	Protein arginine N-methyltransferase 1	Prmt1	Protein arginine N-methyltransferase 1 OS=Mus musculus OX=10090 GN=Prmt1 PE=1 SV=1	16		2.7474	0.0355177	0.00227317	0.771427	0.0202437	20.9289	20.7397	23.6712	23.4922	20.8627	20.8769	16	16	41	130.572	40	1	0	18	15	4	2
Q9D338	39S ribosomal protein L19, mitochondrial	Mrpl19	39S ribosomal protein L19, mitochondrial OS=Mus musculus OX=10090 GN=Mrpl19 PE=1 SV=1	4		2.69718	-0.589322	0.183625	0.220555	0.160185	16.6995	17.2238	18.7566	20.5611	16.543	16.2018	4	4	15.1	105.986	5	0	0	1	4	0	0
Q9JIK9	28S ribosomal protein S34, mitochondrial	Mrps34	28S ribosomal protein S34, mitochondrial OS=Mus musculus OX=10090 GN=Mrps34 PE=1 SV=1	5		2.66978	-0.534088	0.0928255	0.511784	0.0109683	17.5391	16.4076	19.8902	19.396	16.2284	16.6501	5	5	34.4	106.111	10	0	0	6	4	0	0
P62717	60S ribosomal protein L18a	Rpl18a	60S ribosomal protein L18a OS=Mus musculus OX=10090 GN=Rpl18a PE=1 SV=1	2		2.61108	0.849942	0.346304	0.738007	0.459704	19.9479	16.7893	20.9706	20.9887	17.6673	20.7698	2	2	10.2	117.134	4	1	0	1	1	0	1
Q9EP97	Sentrin-specific protease 3	Senp3	Sentrin-specific protease 3 OS=Mus musculus OX=10090 GN=Senp3 PE=1 SV=1	2		2.59881	-3.04643	0.609234	0.679659	0.491913	21.5296	25.9326	29.8961	22.7637	26.1729	15.1965	2	2	4.6	141.492	1	0	0	1	0	0	0
Q8BP67	60S ribosomal protein L24	Rpl24	60S ribosomal protein L24 OS=Mus musculus OX=10090 GN=Rpl24 PE=1 SV=2	3		2.59003	1.87009	0.392313	0.493795	0.0268303	17.7217	21.3919	22.1927	22.1009	21.5042	21.3495	3	3	19.1	126.261	8	0	0	2	2	2	2
Q80X85	28S ribosomal protein S7, mitochondrial	Mrps7	28S ribosomal protein S7, mitochondrial OS=Mus musculus OX=10090 GN=Mrps7 PE=1 SV=1	3		2.57978	-0.538558	0.158389	0.56422	0.0623301	16.6757	17.9979	19.8734	19.9597	16.4718	17.1246	3	3	18.2	108.103	5	0	0	3	2	0	0
P32067	Lupus La protein homolog	Ssb	Lupus La protein homolog OS=Mus musculus OX=10090 GN=Ssb PE=1 SV=1	13		2.5594	0.712869	0.076257	0.311923	0.0283201	20.2939	21.1435	23.4303	23.1258	21.2087	21.6544	13	13	32	130.857	26	0	0	14	8	1	3
Q9D125	28S ribosomal protein S25, mitochondrial	Mrps25	28S ribosomal protein S25, mitochondrial OS=Mus musculus OX=10090 GN=Mrps25 PE=1 SV=1	2		2.52058	-0.935801	0.0444633	0.235982	0.0338651	17.3646	16.5465	19.812	19.1402	16.1621	15.8774	2	2	17	104.903	3	0	0	2	1	0	0
P70318	Nucleolysin TIAR	Tial1	Nucleolysin TIAR OS=Mus musculus OX=10090 GN=Tial1 PE=1 SV=1	2		2.49751	-0.0497713	0.0982957	0.920733	0.00136601	16.7469	17.5407	19.6074	19.6752	17.1456	17.0425	2	2	7.4	107.758	5	0	0	3	2	0	0
Q8BHN5	RNA-binding protein 45	Rbm45	RNA-binding protein 45 OS=Mus musculus OX=10090 GN=Rbm45 PE=1 SV=1	2		2.49205	1.1651	0.00712308	0.351915	0.312678	16.3064	16.408	18.7508	18.9478	18.2438	16.8008	2	2	5.5	105.458	3	0	0	1	2	0	0
P56959	RNA-binding protein FUS	Fus	RNA-binding protein FUS OS=Mus musculus OX=10090 GN=Fus PE=1 SV=1	8		2.44816	-0.338017	0.0512446	0.510547	0.0137764	21.3689	20.6788	23.633	23.3111	20.9131	20.4586	8	8	18.1	130.363	20	1	0	8	9	1	1
Q14C51	Pentatricopeptide repeat domain-containing protein 3, mitochondrial	Ptcd3	Pentatricopeptide repeat domain-containing protein 3, mitochondrial OS=Mus musculus OX=10090 GN=Ptcd3 PE=1 SV=2	5		2.44131	-0.439796	0.0437793	0.450278	0.0385244	16.4921	17.273	19.6659	18.9818	16.6101	16.2754	5	5	8.8	105.298	6	0	0	3	3	0	0
Q99N87	28S ribosomal protein S5, mitochondrial	Mrps5	28S ribosomal protein S5, mitochondrial OS=Mus musculus OX=10090 GN=Mrps5 PE=1 SV=1	4		2.42717	-0.107776	0.104293	0.888164	0.110018	17.8575	16.6874	19.0825	20.3167	16.8897	17.4396	4	4	11.3	108.273	6	0	0	2	4	0	0
O35326	Serine/arginine-rich splicing factor 5	Srsf5	Serine/arginine-rich splicing factor 5 OS=Mus musculus OX=10090 GN=Srsf5 PE=1 SV=2	4		2.41968	0.73954	0.272701	0.628209	0.0988087	16.5922	18.8368	19.9999	20.2684	18.1008	18.8073	4	4	19.3	112.605	6	0	0	2	4	0	0
Q8R035	Peptidyl-tRNA hydrolase ICT1, mitochondrial	Ict1	Peptidyl-tRNA hydrolase ICT1, mitochondrial OS=Mus musculus OX=10090 GN=Mrpl58 PE=1 SV=1	4		2.40099	-0.207711	0.0453342	0.791222	0.145317	17.1273	16.7829	19.3623	19.3499	17.3536	16.1412	4	4	24.3	106.117	4	0	0	3	1	0	0
Q9D0B0	Serine/arginine-rich splicing factor 9	Srsf9	Serine/arginine-rich splicing factor 9 OS=Mus musculus OX=10090 GN=Srsf9 PE=1 SV=1	2		2.40098	-0.0675287	0.214341	0.950469	0.0902542	16.0879	17.7696	19.3457	19.3138	17.2158	16.5067	2	2	9	106.24	2	0	0	1	1	0	0
P83882	60S ribosomal protein L36a	Rpl36a	60S ribosomal protein L36a OS=Mus musculus OX=10090 GN=Rpl36a PE=3 SV=2	2		2.36911	1.11887	0.0951048	0.218094	0.0189185	19.7639	18.9523	21.6373	21.8171	20.4333	20.5207	2	2	15.1	123.125	4	0	0	2	2	0	0
Q9CPS7	RNA-binding protein PNO1	Pno1	RNA-binding protein PNO1 OS=Mus musculus OX=10090 GN=Pno1 PE=1 SV=1	3		2.35847	1.87513	0.0071837	0.00920324	0.00397801	16.9079	16.7898	19.2286	19.186	18.7021	18.7459	3	3	20.2	109.56	5	0	0	3	2	0	0
P62751	60S ribosomal protein L23a	Rpl23a	60S ribosomal protein L23a OS=Mus musculus OX=10090 GN=Rpl23a PE=1 SV=1	3		2.30258	2.04136	0.0887508	0.070857	0.272459	19.5965	18.9474	21.587	21.5621	21.4339	21.1927	3	3	25	124.32	5	0	0	1	1	2	1
Q9D1P0	39S ribosomal protein L13, mitochondrial	Mrpl13	39S ribosomal protein L13, mitochondrial OS=Mus musculus OX=10090 GN=Mrpl13 PE=1 SV=1	3		2.26483	0.248286	0.0407587	0.498908	0.0283025	16.9934	17.4889	19.6079	19.4041	17.4732	17.5056	3	3	24.2	108.473	6	0	0	3	3	0	0
Q8VDM6	Heterogeneous nuclear ribonucleoprotein U-like protein 1	Hnrnpul1	Heterogeneous nuclear ribonucleoprotein U-like protein 1 OS=Mus musculus OX=10090 GN=Hnrnpul1 PE=1 SV=1	6		2.25569	-0.665151	0.27087	0.635377	0.00230115	15.9014	17.9654	19.094	19.2841	16.3415	16.195	6	6	8.4	104.781	6	0	0	3	3	0	0
Q6PDM2	Serine/arginine-rich splicing factor 1	Srsf1	Serine/arginine-rich splicing factor 1 OS=Mus musculus OX=10090 GN=Srsf1 PE=1 SV=3	5		2.22266	-0.215205	0.30644	0.888273	0.13253	16.3234	18.661	19.616	19.8137	16.7248	17.8292	5	5	24.2	108.968	6	0	0	2	4	0	0
Q3UKJ7	WD40 repeat-containing protein SMU1;WD40 repeat-containing protein SMU1, N-terminally processed	Smu1	WD40 repeat-containing protein SMU1 OS=Mus musculus OX=10090 GN=Smu1 PE=2 SV=2	2		2.20224	2.32305	0.199665	0.187877	0.280712	15.3889	16.8181	18.318	18.2935	18.3672	18.486	2	2	6	105.672	0	0	0	0	0	0	0
Q9DCI9	39S ribosomal protein L32, mitochondrial	Mrpl32	39S ribosomal protein L32, mitochondrial OS=Mus musculus OX=10090 GN=Mrpl32 PE=1 SV=1	2		2.16272	-0.0684977	0.227449	0.951449	0.0715929	16.1252	17.8477	19.3467	18.9517	17.3264	16.5095	2	2	16	106.107	3	0	0	1	2	0	0
Q9CPN8	Insulin-like growth factor 2 mRNA-binding protein 3	Igf2bp3	Insulin-like growth factor 2 mRNA-binding protein 3 OS=Mus musculus OX=10090 GN=Igf2bp3 PE=1 SV=1	2		2.16078	0.321234	0.063162	0.67875	0.161557	16.4634	16.4293	18.8271	18.3872	16.186	17.3492	3	1	6.4	103.642	4	0	0	3	1	0	0
Q9JKF7	39S ribosomal protein L39, mitochondrial	Mrpl39	39S ribosomal protein L39, mitochondrial OS=Mus musculus OX=10090 GN=Mrpl39 PE=1 SV=4	4		2.15278	-0.722916	0.164203	0.485879	0.0197534	16.5769	17.9972	19.1395	19.7401	16.2934	16.8348	4	4	14.6	106.582	5	0	0	2	3	0	0
Q9D1B9	39S ribosomal protein L28, mitochondrial	Mrpl28	39S ribosomal protein L28, mitochondrial OS=Mus musculus OX=10090 GN=Mrpl28 PE=1 SV=3	4		2.05724	-2.66799	0.109009	0.0421434	0.0548825	17.3705	18.0977	19.8242	19.7584	15.4847	14.6476	4	4	20.2	105.183	6	0	0	3	3	0	0
Q99ME9	Nucleolar GTP-binding protein 1	Gtpbp4	Nucleolar GTP-binding protein 1 OS=Mus musculus OX=10090 GN=Gtpbp4 PE=1 SV=3	5		2.0464	0.59849	0.265326	0.628351	0.00825465	17.3171	19.1294	20.2818	20.2575	18.8586	18.785	5	5	9.8	114.629	11	0	0	6	5	0	0
P62267	40S ribosomal protein S23	Rps23	40S ribosomal protein S23 OS=Mus musculus OX=10090 GN=Rps23 PE=1 SV=3	5		2.02732	1.24422	0.136315	0.209152	0.0407795	20.8503	21.7518	23.3731	23.2836	22.4507	22.6398	5	5	29.4	134.349	23	1	3	7	4	4	4
Q9CPX7	28S ribosomal protein S16, mitochondrial	Mrps16	28S ribosomal protein S16, mitochondrial OS=Mus musculus OX=10090 GN=Mrps16 PE=1 SV=1	2		2.01666	-2.17491	0.270704	0.239547	0.0282074	18.9316	17.102	20.0691	19.9978	16.0555	15.6282	2	2	19.3	107.784	3	0	0	1	2	0	0
Q62093	Serine/arginine-rich splicing factor 2	Srsf2	Serine/arginine-rich splicing factor 2 OS=Mus musculus OX=10090 GN=Srsf2 PE=1 SV=4	3		2.01312	-0.0894766	0.0285114	0.832309	0.0910111	19.6227	19.337	21.5405	21.4454	19.068	19.7128	3	3	18.6	120.726	7	0	0	3	4	0	0
Q9D0D4	Probable dimethyladenosine transferase	Dimt1	Probable dimethyladenosine transferase OS=Mus musculus OX=10090 GN=Dimt1 PE=2 SV=1	5		1.96352	0.131103	0.00810381	0.54285	0.0094964	17.9717	18.2253	20.1624	19.9617	18.1014	18.3578	5	5	18.2	112.78	7	0	0	4	3	0	0
Q99PU8	Putative ATP-dependent RNA helicase DHX30	Dhx30	ATP-dependent RNA helicase DHX30 OS=Mus musculus OX=10090 GN=Dhx30 PE=1 SV=1	3		1.95822	-0.285802	0.0389071	0.457694	0.0114166	16.9137	16.4124	18.4858	18.7567	16.5505	16.204	3	3	4.2	103.323	4	0	0	2	2	0	0
P43274	Histone H1.4	Hist1h1e	Histone H1.4 OS=Mus musculus OX=10090 GN=H1-4 PE=1 SV=2	2		1.93941	2.92795	0.252681	0.161058	0.0687333	18.9127	17.2548	20.1289	19.9173	20.823	21.2004	5	2	25.1	118.237	3	0	0	0	1	1	1
Q9D0E1	Heterogeneous nuclear ribonucleoprotein M	Hnrnpm	Heterogeneous nuclear ribonucleoprotein M OS=Mus musculus OX=10090 GN=Hnrnpm PE=1 SV=3	29		1.92308	-0.52561	0.00873942	0.106376	0.0285884	26.2382	26.1289	28.0875	28.1258	25.5338	25.7821	29	29	48	159.896	71	2	3	28	28	5	5
Q9DBR1	5-3 exoribonuclease 2	Xrn2	5-3 exoribonuclease 2 OS=Mus musculus OX=10090 GN=Xrn2 PE=1 SV=1	9		1.91866	-1.65271	0.109557	0.0921291	0.0856484	17.7784	18.2885	20.4436	19.4606	16.4166	16.3449	9	9	14.5	108.733	9	0	0	5	4	0	0
Q80ZS3	28S ribosomal protein S26, mitochondrial	Mrps26	28S ribosomal protein S26, mitochondrial OS=Mus musculus OX=10090 GN=Mrps26 PE=1 SV=1	2		1.89111	-1.15267	0.229979	0.205562	0.0959403	17.4155	17.2194	19.9405	18.4767	15.7487	16.5809	2	2	11.5	105.382	1	0	0	1	0	0	0
P17225	Polypyrimidine tract-binding protein 1	Ptbp1	Polypyrimidine tract-binding protein 1 OS=Mus musculus OX=10090 GN=Ptbp1 PE=1 SV=2	15		1.86312	-0.473926	0.0505512	0.24625	0.0033844	22.3305	21.8843	24.0517	23.8894	21.5361	21.7309	15	13	53.1	135.423	49	2	0	22	19	3	3
Q9CW46	Ribonucleoprotein PTB-binding 1	Raver1	Ribonucleoprotein PTB-binding 1 OS=Mus musculus OX=10090 GN=Raver1 PE=1 SV=2	2		1.85459	0.0907192	0.0311359	0.826604	0.0769647	17.5893	17.6841	19.6332	19.3494	18.0517	17.4032	2	2	4.3	109.711	3	0	0	2	1	0	0
Q9ESX5	H/ACA ribonucleoprotein complex subunit 4	Dkc1	H/ACA ribonucleoprotein complex subunit DKC1 OS=Mus musculus OX=10090 GN=Dkc1 PE=1 SV=4	2		1.80908	1.5038	0.135199	0.284744	0.772901	16.7711	17.5723	19.0243	18.9372	19.4946	17.8564	2	2	5.9	109.656	3	0	0	1	2	0	0
P62852	40S ribosomal protein S25	Rps25	40S ribosomal protein S25 OS=Mus musculus OX=10090 GN=Rps25 PE=1 SV=1	3		1.79435	0.855337	0.0207938	0.388438	0.35403	19.6926	19.8112	21.6762	21.4164	20.0057	21.2088	3	3	16	123.811	8	0	0	3	3	1	1
Q64213	Splicing factor 1	Sf1	Splicing factor 1 OS=Mus musculus OX=10090 GN=Sf1 PE=1 SV=6	7		1.79082	-1.51809	0.138267	0.342214	0.182461	17.9524	18.7702	20.2031	20.1011	15.8633	17.8231	7	7	15.2	110.713	9	0	0	5	4	0	0
P97351	40S ribosomal protein S3a	Rps3a	40S ribosomal protein S3a OS=Mus musculus OX=10090 GN=Rps3a PE=1 SV=3	8		1.78177	1.40052	0.0186166	0.0749765	0.23862	20.3328	20.2859	22.0107	22.1715	21.8855	21.5342	8	8	30.7	128.221	22	0	0	8	7	3	4
Q8BJZ4	28S ribosomal protein S35, mitochondrial	Mrps35	28S ribosomal protein S35, mitochondrial OS=Mus musculus OX=10090 GN=Mrps35 PE=1 SV=2	2		1.7796	-0.809507	0.195353	0.389311	0.110759	17.7791	16.6354	19.695	18.2787	15.9383	16.8572	2	2	8.1	105.184	2	0	0	2	0	0	0
D3YXK2	Scaffold attachment factor B1	Safb	Scaffold attachment factor B1 OS=Mus musculus OX=10090 GN=Safb PE=1 SV=2	23		1.76488	-2.16431	0.275848	0.219965	0.0237582	15.4378	17.0713	18.0059	18.0329	14.2435	13.937	23	23	21.9	96.7284	4	0	0	1	3	0	0
P62754	40S ribosomal protein S6	Rps6	40S ribosomal protein S6 OS=Mus musculus OX=10090 GN=Rps6 PE=1 SV=1	3		1.67712	0.989505	0.0253956	0.0839215	0.0394046	21.2854	20.9645	22.8878	22.7163	22.0704	22.1585	3	3	14.1	132.083	13	1	0	4	4	2	2
Q99K48	Non-POU domain-containing octamer-binding protein	Nono	Non-POU domain-containing octamer-binding protein OS=Mus musculus OX=10090 GN=Nono PE=1 SV=3	11		1.64862	-0.273389	0.0628783	0.455012	0.0167527	20.8974	21.375	22.874	22.6956	20.8327	20.893	12	11	35.3	129.568	28	0	2	13	10	1	2
P62849	40S ribosomal protein S24	Rps24	40S ribosomal protein S24 OS=Mus musculus OX=10090 GN=Rps24 PE=1 SV=1	4		1.55343	0.718455	0.0765509	0.171196	0.0244762	20.547	20.0628	21.9326	21.784	20.9264	21.1202	4	4	35.3	126.373	16	1	1	4	4	3	3
Q8BL97	Serine/arginine-rich splicing factor 7	Srsf7	Serine/arginine-rich splicing factor 7 OS=Mus musculus OX=10090 GN=Srsf7 PE=1 SV=1	4		1.53187	-0.400192	0.00204666	0.174324	0.0349026	20.1895	20.271	21.7897	21.7346	19.9597	19.7005	5	4	17.2	123.645	7	0	0	2	3	1	1
Q8VIJ6	Splicing factor, proline- and glutamine-rich	Sfpq	Splicing factor, proline- and glutamine-rich OS=Mus musculus OX=10090 GN=Sfpq PE=1 SV=1	15		1.49273	-0.915067	0.0405808	0.0410522	0.00635863	21.7343	21.937	23.3164	23.3403	20.8784	20.9627	15	14	27	132.169	49	3	3	15	19	4	5
P09405	Nucleolin	Ncl	Nucleolin OS=Mus musculus OX=10090 GN=Ncl PE=1 SV=2	21		1.4807	0.547178	0.0129818	0.0781312	0.0246398	21.806	22.044	23.4929	23.3185	22.3626	22.5817	21	21	28.7	135.606	70	5	5	16	20	13	11
Q9WVB0	RNA-binding protein with multiple splicing	Rbpms	RNA-binding protein with multiple splicing OS=Mus musculus OX=10090 GN=Rbpms PE=1 SV=2	3		1.43949	-0.788685	0.1982	0.393079	0.112054	18.5775	17.6945	20.161	18.9899	16.7795	17.915	5	3	34.5	110.117	2	0	0	2	0	0	0
P62242	40S ribosomal protein S8	Rps8	40S ribosomal protein S8 OS=Mus musculus OX=10090 GN=Rps8 PE=1 SV=2	6		1.43129	0.717834	0.00831256	0.0158026	0.00939692	21.2828	21.3272	22.7871	22.6855	21.9772	22.0685	6	6	34.6	132.128	28	2	3	8	7	4	4
P26369	Splicing factor U2AF 65 kDa subunit	U2af2	Splicing factor U2AF 65 kDa subunit OS=Mus musculus OX=10090 GN=U2af2 PE=1 SV=3	6		1.41357	-0.588135	0.00445889	0.134997	0.0401763	19.8302	19.9409	21.2636	21.3347	19.4539	19.1409	6	6	26.5	120.964	12	0	1	6	5	0	0
Q8BU88	39S ribosomal protein L22, mitochondrial	Mrpl22	39S ribosomal protein L22, mitochondrial OS=Mus musculus OX=10090 GN=Mrpl22 PE=1 SV=1	3		1.40245	-1.74166	0.0939487	0.413615	0.256756	17.4694	17.9793	19.1999	19.0538	17.3291	14.6363	3	3	20.4	105.668	6	0	0	3	3	0	0
P62911	60S ribosomal protein L32	Rpl32	60S ribosomal protein L32 OS=Mus musculus OX=10090 GN=Rpl32 PE=1 SV=2	2		1.39529	-0.42312	0.353468	0.744844	0.218312	18.6144	16.8443	19.2847	18.9646	16.6112	18.0013	2	2	11.1	108.321	3	0	0	2	1	0	0
P47911	60S ribosomal protein L6	Rpl6	60S ribosomal protein L6 OS=Mus musculus OX=10090 GN=Rpl6 PE=1 SV=3	8		1.3883	1.369	0.194199	0.191309	0.810684	19.6185	20.4954	21.4269	21.4637	21.4884	21.3635	8	8	26.7	125.856	28	0	1	8	11	4	4
P62830	60S ribosomal protein L23	Rpl23	60S ribosomal protein L23 OS=Mus musculus OX=10090 GN=Rpl23 PE=1 SV=1	3		1.32736	1.72193	0.312487	0.231531	0.343787	20.8694	22.3474	23.1029	22.7686	23.0739	23.5868	3	3	23.6	135.749	13	0	0	3	4	3	3
Q9EPU0	Regulator of nonsense transcripts 1	Upf1	Regulator of nonsense transcripts 1 OS=Mus musculus OX=10090 GN=Upf1 PE=1 SV=2	18		1.29302	-0.3985	0.0912176	0.339876	0.0235271	18.7157	19.188	20.3188	20.1708	18.5665	18.5402	18	18	20	115.5	19	0	0	9	10	0	0
Q8BGD9	Eukaryotic translation initiation factor 4B	Eif4b	Eukaryotic translation initiation factor 4B OS=Mus musculus OX=10090 GN=Eif4b PE=1 SV=1	2		1.29096	2.28858	0.536339	0.351174	0.43455	16.3424	19.2251	18.2363	19.9131	20.3369	19.8077	2	2	4.9	113.861	2	0	0	1	0	0	1
Q9JIX8	Apoptotic chromatin condensation inducer in the nucleus	Acin1	Apoptotic chromatin condensation inducer in the nucleus OS=Mus musculus OX=10090 GN=Acin1 PE=1 SV=3	2		1.26743	-0.264593	0.205047	0.831123	0.329062	16.1613	16.7868	18.2724	17.2107	17.1715	15.2475	2	2	2.1	100.85	2	0	0	1	1	0	0
Q3UEB3	Poly(U)-binding-splicing factor PUF60	Puf60	Poly(U)-binding-splicing factor PUF60 OS=Mus musculus OX=10090 GN=Puf60 PE=1 SV=2	3		1.25751	-0.24176	0.0300964	0.519411	0.0973895	18.5172	18.2751	19.5971	19.7102	18.4156	17.8931	3	3	7.8	112.408	4	0	0	2	2	0	0
Q9D883	Splicing factor U2AF 35 kDa subunit	U2af1	Splicing factor U2AF 35 kDa subunit OS=Mus musculus OX=10090 GN=U2af1 PE=1 SV=4	3		1.2406	0.686187	0.149838	0.338636	0.393092	20.2733	20.2951	21.2265	21.8232	20.5663	21.3745	3	3	18	125.559	9	1	1	2	2	1	2
Q8CI11	Guanine nucleotide-binding protein-like 3	Gnl3	Guanine nucleotide-binding protein-like 3 OS=Mus musculus OX=10090 GN=Gnl3 PE=1 SV=2	5		1.23196	1.2266	0.157401	0.12405	0.98573	18.9167	18.1954	19.6787	19.8973	19.5535	20.0118	5	5	12.3	116.253	9	0	1	4	2	0	2
P62301	40S ribosomal protein S13	Rps13	40S ribosomal protein S13 OS=Mus musculus OX=10090 GN=Rps13 PE=1 SV=2	4		1.21203	0.364577	0.0231743	0.200107	0.0470969	20.3809	20.3416	21.5067	21.6398	20.6026	20.849	4	4	25.2	125.321	12	1	0	4	4	2	1
Q8CFE4	SCY1-like protein 2	Scyl2	SCY1-like protein 2 OS=Mus musculus OX=10090 GN=Scyl2 PE=1 SV=1	3		1.21102	2.88226	0.204155	0.0905855	0.0172797	16.3767	17.2761	17.9035	18.1713	19.7864	19.6309	3	3	4.4	109.145	4	0	0	0	0	2	2
Q62383	Transcription elongation factor SPT6	Supt6h	Transcription elongation factor SPT6 OS=Mus musculus OX=10090 GN=Supt6h PE=1 SV=2	2		1.20531	0.420419	0.0736176	0.755403	0.588181	16.8656	17.1499	18.2036	18.2225	16.3889	18.4673	2	2	1.7	105.298	3	0	0	2	1	0	0
O35658	Complement component 1 Q subcomponent-binding protein, mitochondrial	C1qbp	Complement component 1 Q subcomponent-binding protein, mitochondrial OS=Mus musculus OX=10090 GN=C1qbp PE=1 SV=1	2		1.20039	0.79307	0.623183	0.734402	0.360864	20.2959	16.7173	19.9755	19.4385	19.235	19.3644	2	2	9.7	115.026	4	1	1	1	1	0	0
Q9Z1D1	Eukaryotic translation initiation factor 3 subunit G	Eif3g	Eukaryotic translation initiation factor 3 subunit G OS=Mus musculus OX=10090 GN=Eif3g PE=1 SV=2	4		1.19548	1.94428	0.541028	0.387339	0.0510919	17.7539	20.4778	20.4046	20.2181	20.9305	21.1898	4	4	16.9	120.975	8	0	1	3	3	0	1
P62996	Transformer-2 protein homolog beta	Tra2b	Transformer-2 protein homolog beta OS=Mus musculus OX=10090 GN=Tra2b PE=1 SV=1	4		1.19474	-0.269416	0.0841651	0.497714	0.0475675	20.429	19.8862	21.523	21.1817	19.8239	19.9525	4	4	17.4	122.796	9	1	1	3	3	0	1
Q91VJ4	Serine/threonine-protein kinase 38	Stk38	Serine/threonine-protein kinase 38 OS=Mus musculus OX=10090 GN=Stk38 PE=1 SV=1	4		1.18212	2.91117	0.113776	0.0143694	0.0668277	17.5321	18.0399	18.6359	19.3003	20.4995	20.8948	4	4	12.3	114.903	4	0	0	0	0	2	2
P62264	40S ribosomal protein S14	Rps14	40S ribosomal protein S14 OS=Mus musculus OX=10090 GN=Rps14 PE=1 SV=3	6		1.18067	0.942239	0.0511945	0.0261922	0.274594	22.0912	22.3038	23.3961	23.3602	23.0271	23.2524	6	6	37.7	137.431	25	3	4	7	5	4	2
Q9QZQ8;Q8CCK0	Core histone macro-H2A.1;Core histone macro-H2A.2	H2afy;H2afy2	Core histone macro-H2A.1 OS=Mus musculus OX=10090 GN=Macroh2a1 PE=1 SV=3;Core histone macro-H2A.2 OS=Mus musculus OX=10090 GN=Macroh2a2 PE=1 SV=3	2		1.13896	1.7248	0.576331	0.445946	0.175168	19.7045	16.7948	19.5709	19.2063	20.0197	19.9292	2	2	9.9	115.225	0	0	0	0	0	0	0
[truncated: 348 more rows]

## Sheet: 6_hnrnpu_log2_pass_no_con
Majority protein IDs	Protein names	Gene names	Fasta headers	Razor + unique peptides	Student's T-test Difference hnrnpU_eGFP	Student's T-test Difference hnrnpU∆RGG_eGFP	Student's T-test p-value hnrnpU_eGFP	Student's T-test p-value hnrnpU∆RGG_eGFP	Student's T-test p-value hnrnpU_hnrnpU∆RGG	Log2 LFQ intensity 5 eGFP R1	Log2 LFQ intensity 6 eGFP R2	Log2 LFQ intensity 9- hnrnpU R1	Log2 LFQ intensity 9- hnrnpU R2	Log2 LFQ intensity 10- hnrnpU∆RGG R1	Log2 LFQ intensity 10- hnrnpU∆RGG R2	Peptides	Unique peptides	Sequence coverage [%]	Summed Log2 LFQ Intensity	MS/MS count	MS/MS count 5	MS/MS count 6	MS/MS count 9-R1	MS/MS count 9-R2	MS/MS count 10-R1	MS/MS count 10-R2
[truncated: 165 more rows]
