# Supplementary material
Source: HighWire-hosted journal article supplement (doi:10.1101/rna.079569.122)
Supplement: Supplemental_Table_S8.xlsx [file Supplemental_Table_S8.xlsx]

## Sheet: h3k27me3_peak_locations
UnionChr	UnionStart	UnionEnd	IntersectChr	IntersectStart	IntersectEnd	IntersectName	Overlap	Genotype	PeakType
chr1	4478778	4479151	chr1	4478778	4479151	wt_k27_peak_4	373	WT	WT Specific
chr1	4483527	4483784	chr1	4483527	4483784	wt_k27_peak_5	257	WT	WT Specific
chr1	5588892	5589149	chr1	5588892	5589149	wt_k27_peak_13	257	WT	WT Specific
chr1	9296481	9297346	chr1	9296481	9297346	wt_k27_peak_21	865	WT	WT Specific
chr1	12876580	12876966	chr1	12876580	12876966	wt_k27_peak_34	386	WT	WT Specific
chr1	13053592	13053871	chr1	13053592	13053871	wt_k27_peak_38	279	WT	WT Specific
chr1	13425521	13426012	chr1	13425521	13426012	wt_k27_peak_43	491	WT	WT Specific
chr1	14293412	14293889	chr1	14293412	14293889	wt_k27_peak_46	477	WT	WT Specific
chr1	16665829	16666176	chr1	16665829	16666176	wt_k27_peak_68	347	WT	WT Specific
chr1	17100350	17100607	chr1	17100350	17100607	wt_k27_peak_72	257	WT	WT Specific
chr1	18979225	18979510	chr1	18979225	18979510	wt_k27_peak_75	285	WT	WT Specific
chr1	19203432	19203933	chr1	19203432	19203933	wt_k27_peak_82	501	WT	WT Specific
chr1	20477275	20477576	chr1	20477275	20477576	wt_k27_peak_90	301	WT	WT Specific
chr1	20759680	20759937	chr1	20759680	20759937	wt_k27_peak_91	257	WT	WT Specific
chr1	20893232	20893567	chr1	20893232	20893567	wt_k27_peak_94	335	WT	WT Specific
chr1	24267163	24267440	chr1	24267163	24267440	wt_k27_peak_111	277	WT	WT Specific
chr1	25825866	25826323	chr1	25825866	25826323	wt_k27_peak_115	457	WT	WT Specific
chr1	34004104	34004463	chr1	34004104	34004463	wt_k27_peak_124	359	WT	WT Specific
chr1	34746931	34747523	chr1	34746931	34747523	wt_k27_peak_139	592	WT	WT Specific
chr1	34845181	34846094	chr1	34845181	34846094	wt_k27_peak_144	913	WT	WT Specific
chr1	36114627	36115280	chr1	36114627	36115280	wt_k27_peak_152	653	WT	WT Specific
chr1	36276413	36276774	chr1	36276413	36276774	wt_k27_peak_158	361	WT	WT Specific
chr1	36470014	36470457	chr1	36470014	36470457	wt_k27_peak_165	443	WT	WT Specific
chr1	36740522	36740889	chr1	36740522	36740889	wt_k27_peak_171	367	WT	WT Specific
chr1	36770638	36771073	chr1	36770638	36771073	wt_k27_peak_172	435	WT	WT Specific
chr1	37623634	37624065	chr1	37623634	37624065	wt_k27_peak_180	431	WT	WT Specific
chr1	37944687	37945027	chr1	37944687	37945027	wt_k27_peak_189	340	WT	WT Specific
chr1	38787098	38787356	chr1	38787098	38787356	wt_k27_peak_197	258	WT	WT Specific
chr1	39028857	39029125	chr1	39028857	39029125	wt_k27_peak_200	268	WT	WT Specific
chr1	39336499	39336849	chr1	39336499	39336849	wt_k27_peak_204	350	WT	WT Specific
chr1	39340231	39340735	chr1	39340231	39340735	wt_k27_peak_205	504	WT	WT Specific
chr1	39863047	39863776	chr1	39863047	39863776	wt_k27_peak_212	729	WT	WT Specific
chr1	40327703	40328241	chr1	40327703	40328241	wt_k27_peak_217	538	WT	WT Specific
chr1	40580117	40580644	chr1	40580117	40580644	wt_k27_peak_220	527	WT	WT Specific
chr1	42183948	42184556	chr1	42183948	42184556	wt_k27_peak_228	608	WT	WT Specific
chr1	42493658	42493943	chr1	42493658	42493943	wt_k27_peak_233	285	WT	WT Specific
chr1	42680857	42681114	chr1	42680857	42681114	wt_k27_peak_235	257	WT	WT Specific
chr1	42724690	42725064	chr1	42724690	42725064	wt_k27_peak_239	374	WT	WT Specific
chr1	42726346	42726650	chr1	42726346	42726650	wt_k27_peak_240	304	WT	WT Specific
chr1	43161223	43161691	chr1	43161223	43161691	wt_k27_peak_246	468	WT	WT Specific
chr1	44040878	44041685	chr1	44040878	44041685	wt_k27_peak_249	807	WT	WT Specific
chr1	45923421	45923751	chr1	45923421	45923751	wt_k27_peak_259	330	WT	WT Specific
chr1	46251379	46251636	chr1	46251379	46251636	wt_k27_peak_262	257	WT	WT Specific
chr1	51598216	51598474	chr1	51598216	51598474	wt_k27_peak_265	258	WT	WT Specific
chr1	51696922	51697828	chr1	51696922	51697828	wt_k27_peak_266	906	WT	WT Specific
chr1	52235423	52235823	chr1	52235423	52235823	wt_k27_peak_271	400	WT	WT Specific
chr1	54558961	54559690	chr1	54558961	54559690	wt_k27_peak_278	729	WT	WT Specific
chr1	55050174	55050658	chr1	55050174	55050658	wt_k27_peak_281	484	WT	WT Specific
chr1	55051510	55051777	chr1	55051510	55051777	wt_k27_peak_282	267	WT	WT Specific
chr1	57170438	57170954	chr1	57170438	57170954	wt_k27_peak_293	516	WT	WT Specific
chr1	58274730	58275124	chr1	58274730	58275124	wt_k27_peak_297	394	WT	WT Specific
chr1	59334040	59334417	chr1	59334040	59334417	wt_k27_peak_301	377	WT	WT Specific
chr1	59465148	59465522	chr1	59465148	59465522	wt_k27_peak_302	374	WT	WT Specific
chr1	59594630	59595211	chr1	59594630	59595211	wt_k27_peak_311	581	WT	WT Specific
chr1	59682813	59683094	chr1	59682813	59683094	wt_k27_peak_315	281	WT	WT Specific
chr1	60100001	60100326	chr1	60100001	60100326	wt_k27_peak_319	325	WT	WT Specific
chr1	62711603	62712138	chr1	62711603	62712138	wt_k27_peak_325	535	WT	WT Specific
chr1	63634649	63634958	chr1	63634649	63634958	wt_k27_peak_330	309	WT	WT Specific
chr1	63726877	63727161	chr1	63726877	63727161	wt_k27_peak_333	284	WT	WT Specific
chr1	66173876	66174749	chr1	66173876	66174749	wt_k27_peak_342	873	WT	WT Specific
chr1	72288330	72288615	chr1	72288330	72288615	wt_k27_peak_357	285	WT	WT Specific
chr1	72894298	72894808	chr1	72894298	72894808	wt_k27_peak_366	510	WT	WT Specific
chr1	72942578	72942933	chr1	72942578	72942933	wt_k27_peak_367	355	WT	WT Specific
chr1	72949975	72950263	chr1	72949975	72950263	wt_k27_peak_372	288	WT	WT Specific
chr1	74117740	74117998	chr1	74117740	74117998	wt_k27_peak_380	258	WT	WT Specific
chr1	74132868	74133448	chr1	74132868	74133448	wt_k27_peak_384	580	WT	WT Specific
chr1	74331178	74331563	chr1	74331178	74331563	wt_k27_peak_385	385	WT	WT Specific
chr1	74759328	74759725	chr1	74759328	74759725	wt_k27_peak_391	397	WT	WT Specific
chr1	74871641	74872299	chr1	74871641	74872299	wt_k27_peak_405	658	WT	WT Specific
chr1	74906289	74906780	chr1	74906289	74906780	wt_k27_peak_411	491	WT	WT Specific
chr1	74933031	74933696	chr1	74933031	74933696	wt_k27_peak_416	665	WT	WT Specific
chr1	75261267	75261659	chr1	75261267	75261659	wt_k27_peak_425	392	WT	WT Specific
chr1	75373054	75373352	chr1	75373054	75373352	wt_k27_peak_434	298	WT	WT Specific
chr1	75392930	75393647	chr1	75392930	75393647	wt_k27_peak_439	717	WT	WT Specific
chr1	75591477	75591924	chr1	75591477	75591924	wt_k27_peak_464	447	WT	WT Specific
chr1	75598972	75599261	chr1	75598972	75599261	wt_k27_peak_465	289	WT	WT Specific
chr1	75601304	75601649	chr1	75601304	75601649	wt_k27_peak_467	345	WT	WT Specific
chr1	77932195	77932461	chr1	77932195	77932461	wt_k27_peak_475	266	WT	WT Specific
chr1	77945497	77945908	chr1	77945497	77945908	wt_k27_peak_476	411	WT	WT Specific
chr1	78007171	78008510	chr1	78007171	78008510	wt_k27_peak_481	1339	WT	WT Specific
chr1	78128580	78129703	chr1	78128580	78129703	wt_k27_peak_489	1123	WT	WT Specific
chr1	78171234	78171683	chr1	78171234	78171683	wt_k27_peak_495	449	WT	WT Specific
chr1	78176717	78177144	chr1	78176717	78177144	wt_k27_peak_496	427	WT	WT Specific
chr1	79445867	79446213	chr1	79445867	79446213	wt_k27_peak_505	346	WT	WT Specific
chr1	79456024	79456346	chr1	79456024	79456346	wt_k27_peak_508	322	WT	WT Specific
chr1	80761304	80761632	chr1	80761304	80761632	wt_k27_peak_514	328	WT	WT Specific
chr1	82588344	82588705	chr1	82588344	82588705	wt_k27_peak_522	361	WT	WT Specific
chr1	85097500	85097852	chr1	85097500	85097852	wt_k27_peak_531	352	WT	WT Specific
chr1	85098183	85098440	chr1	85098183	85098440	wt_k27_peak_532	257	WT	WT Specific
chr1	85185656	85186067	chr1	85185656	85186067	wt_k27_peak_533	411	WT	WT Specific
chr1	85582745	85583115	chr1	85582745	85583115	wt_k27_peak_534	370	WT	WT Specific
chr1	87195105	87195549	chr1	87195105	87195549	wt_k27_peak_555	444	WT	WT Specific
chr1	87201386	87201798	chr1	87201386	87201798	wt_k27_peak_556	412	WT	WT Specific
chr1	87271888	87272699	chr1	87271888	87272699	wt_k27_peak_562	811	WT	WT Specific
chr1	87280944	87281346	chr1	87280944	87281346	wt_k27_peak_563	402	WT	WT Specific
chr1	87471314	87471730	chr1	87471314	87471730	wt_k27_peak_564	416	WT	WT Specific
chr1	87749718	87750086	chr1	87749718	87750086	wt_k27_peak_567	368	WT	WT Specific
chr1	88199533	88199820	chr1	88199533	88199820	wt_k27_peak_570	287	WT	WT Specific
chr1	88202218	88202871	chr1	88202218	88202871	wt_k27_peak_571	653	WT	WT Specific
chr1	89016560	89016856	chr1	89016560	89016856	wt_k27_peak_584	296	WT	WT Specific
chr1	89456102	89456521	chr1	89456102	89456521	wt_k27_peak_586	419	WT	WT Specific
chr1	89964841	89965295	chr1	89964841	89965295	wt_k27_peak_596	454	WT	WT Specific
chr1	90204431	90205561	chr1	90204431	90205561	wt_k27_peak_602	1130	WT	WT Specific
chr1	91612259	91612599	chr1	91612259	91612599	wt_k27_peak_623	340	WT	WT Specific
chr1	91779269	91779838	chr1	91779269	91779838	wt_k27_peak_625	569	WT	WT Specific
chr1	92611870	92612242	chr1	92611870	92612242	wt_k27_peak_629	372	WT	WT Specific
chr1	92933867	92934279	chr1	92933867	92934279	wt_k27_peak_635	412	WT	WT Specific
chr1	93175060	93175636	chr1	93175060	93175636	wt_k27_peak_638	576	WT	WT Specific
chr1	93184513	93184783	chr1	93184513	93184783	wt_k27_peak_640	270	WT	WT Specific
chr1	94079515	94079801	chr1	94079515	94079801	wt_k27_peak_650	286	WT	WT Specific
chr1	98097470	98097819	chr1	98097470	98097819	wt_k27_peak_660	349	WT	WT Specific
chr1	105814861	105815138	chr1	105814861	105815138	wt_k27_peak_671	277	WT	WT Specific
chr1	105879676	105879952	chr1	105879676	105879952	wt_k27_peak_673	276	WT	WT Specific
chr1	118774945	118775413	chr1	118774945	118775413	wt_k27_peak_683	468	WT	WT Specific
chr1	119048641	119048946	chr1	119048641	119048946	wt_k27_peak_684	305	WT	WT Specific
chr1	119341205	119341521	chr1	119341205	119341521	wt_k27_peak_690	316	WT	WT Specific
chr1	120071744	120072153	chr1	120071744	120072153	wt_k27_peak_697	409	WT	WT Specific
chr1	120332602	120332859	chr1	120332602	120332859	wt_k27_peak_700	257	WT	WT Specific
chr1	120586089	120586535	chr1	120586089	120586535	wt_k27_peak_703	446	WT	WT Specific
chr1	120625897	120626372	chr1	120625897	120626372	wt_k27_peak_707	475	WT	WT Specific
chr1	121124955	121125212	chr1	121124955	121125212	wt_k27_peak_711	257	WT	WT Specific
chr1	125676335	125676736	chr1	125676335	125676736	wt_k27_peak_716	401	WT	WT Specific
chr1	126828952	126829522	chr1	126828952	126829522	wt_k27_peak_720	570	WT	WT Specific
chr1	128302797	128303576	chr1	128302797	128303576	wt_k27_peak_725	779	WT	WT Specific
chr1	128448180	128448675	chr1	128448180	128448675	wt_k27_peak_726	495	WT	WT Specific
chr1	128457677	128458087	chr1	128457677	128458087	wt_k27_peak_727	410	WT	WT Specific
chr1	130737033	130737501	chr1	130737033	130737501	wt_k27_peak_737	468	WT	WT Specific
chr1	130886229	130886531	chr1	130886229	130886531	wt_k27_peak_743	302	WT	WT Specific
chr1	131113919	131114719	chr1	131113919	131114719	wt_k27_peak_751	800	WT	WT Specific
chr1	131271474	131272026	chr1	131271474	131272026	wt_k27_peak_761	552	WT	WT Specific
chr1	131743545	131744093	chr1	131743545	131744093	wt_k27_peak_768	548	WT	WT Specific
chr1	131974426	131974787	chr1	131974426	131974787	wt_k27_peak_780	361	WT	WT Specific
chr1	132211672	132212005	chr1	132211672	132212005	wt_k27_peak_791	333	WT	WT Specific
chr1	132312184	132312481	chr1	132312184	132312481	wt_k27_peak_796	297	WT	WT Specific
chr1	132332105	132332466	chr1	132332105	132332466	wt_k27_peak_798	361	WT	WT Specific
chr1	133755480	133755746	chr1	133755480	133755746	wt_k27_peak_839	266	WT	WT Specific
chr1	133818785	133819106	chr1	133818785	133819106	wt_k27_peak_843	321	WT	WT Specific
chr1	133886369	133887061	chr1	133886369	133887061	wt_k27_peak_846	692	WT	WT Specific
chr1	133891327	133891600	chr1	133891327	133891600	wt_k27_peak_848	273	WT	WT Specific
chr1	134060143	134060836	chr1	134060143	134060836	wt_k27_peak_850	693	WT	WT Specific
chr1	134094760	134095418	chr1	134094760	134095418	wt_k27_peak_854	658	WT	WT Specific
chr1	134240370	134240818	chr1	134240370	134240818	wt_k27_peak_858	448	WT	WT Specific
chr1	135369020	135369817	chr1	135369020	135369817	wt_k27_peak_875	797	WT	WT Specific
chr1	135766305	135767124	chr1	135766305	135767124	wt_k27_peak_886	819	WT	WT Specific
chr1	135998534	135998962	chr1	135998534	135998962	wt_k27_peak_897	428	WT	WT Specific
chr1	136134625	136134911	chr1	136134625	136134911	wt_k27_peak_904	286	WT	WT Specific
chr1	136958878	136959374	chr1	136958878	136959374	wt_k27_peak_915	496	WT	WT Specific
chr1	137393097	137393795	chr1	137393097	137393795	wt_k27_peak_916	698	WT	WT Specific
chr1	140662647	140662947	chr1	140662647	140662947	wt_k27_peak_925	300	WT	WT Specific
chr1	141475568	141475840	chr1	141475568	141475840	wt_k27_peak_926	272	WT	WT Specific
chr1	144001511	144001777	chr1	144001511	144001777	wt_k27_peak_929	266	WT	WT Specific
chr1	147318531	147319024	chr1	147318531	147319024	wt_k27_peak_932	493	WT	WT Specific
chr1	150994491	150994970	chr1	150994491	150994970	wt_k27_peak_935	479	WT	WT Specific
chr1	151033023	151033441	chr1	151033023	151033441	wt_k27_peak_936	418	WT	WT Specific
chr1	151250549	151250922	chr1	151250549	151250922	wt_k27_peak_937	373	WT	WT Specific
chr1	151499172	151499510	chr1	151499172	151499510	wt_k27_peak_939	338	WT	WT Specific
chr1	152095152	152095634	chr1	152095152	152095634	wt_k27_peak_945	482	WT	WT Specific
chr1	152398583	152399075	chr1	152398583	152399075	wt_k27_peak_946	492	WT	WT Specific
chr1	153753706	153753991	chr1	153753706	153753991	wt_k27_peak_975	285	WT	WT Specific
chr1	153808688	153808987	chr1	153808688	153808987	wt_k27_peak_977	299	WT	WT Specific
chr1	154178713	154179028	chr1	154178713	154179028	wt_k27_peak_984	315	WT	WT Specific
chr1	154417168	154417504	chr1	154417168	154417504	wt_k27_peak_989	336	WT	WT Specific
chr1	154730379	154730724	chr1	154730379	154730724	wt_k27_peak_991	345	WT	WT Specific
chr1	154784751	154785187	chr1	154784751	154785187	wt_k27_peak_993	436	WT	WT Specific
chr1	155072922	155073429	chr1	155072922	155073429	wt_k27_peak_998	507	WT	WT Specific
chr1	155077854	155078285	chr1	155077854	155078285	wt_k27_peak_1001	431	WT	WT Specific
chr1	155231361	155231921	chr1	155231361	155231921	wt_k27_peak_1009	560	WT	WT Specific
chr1	155415358	155415699	chr1	155415358	155415699	wt_k27_peak_1012	341	WT	WT Specific
chr1	156230703	156230971	chr1	156230703	156230971	wt_k27_peak_1022	268	WT	WT Specific
chr1	156295488	156295939	chr1	156295488	156295939	wt_k27_peak_1023	451	WT	WT Specific
chr1	156306623	156307050	chr1	156306623	156307050	wt_k27_peak_1025	427	WT	WT Specific
chr1	156717705	156718013	chr1	156717705	156718013	wt_k27_peak_1027	308	WT	WT Specific
chr1	158359895	158360308	chr1	158359895	158360308	wt_k27_peak_1040	413	WT	WT Specific
chr1	158360976	158361489	chr1	158360976	158361489	wt_k27_peak_1041	513	WT	WT Specific
chr1	158961074	158961695	chr1	158961074	158961695	wt_k27_peak_1043	621	WT	WT Specific
chr1	159523113	159523547	chr1	159523113	159523547	wt_k27_peak_1044	434	WT	WT Specific
chr1	159526154	159526518	chr1	159526154	159526518	wt_k27_peak_1046	364	WT	WT Specific
chr1	161172947	161173210	chr1	161172947	161173210	wt_k27_peak_1052	263	WT	WT Specific
chr1	161695705	161696314	chr1	161695705	161696314	wt_k27_peak_1054	609	WT	WT Specific
chr1	161965206	161965466	chr1	161965206	161965466	wt_k27_peak_1062	260	WT	WT Specific
chr1	161999013	161999596	chr1	161999013	161999596	wt_k27_peak_1063	583	WT	WT Specific
chr1	163358747	163359024	chr1	163358747	163359024	wt_k27_peak_1070	277	WT	WT Specific
chr1	164456723	164457554	chr1	164456723	164457554	wt_k27_peak_1071	831	WT	WT Specific
chr1	165701165	165701614	chr1	165701165	165701614	wt_k27_peak_1080	449	WT	WT Specific
chr1	166041350	166041666	chr1	166041350	166041666	wt_k27_peak_1092	316	WT	WT Specific
chr1	166056290	166056592	chr1	166056290	166056592	wt_k27_peak_1097	302	WT	WT Specific
chr1	166160253	166160599	chr1	166160253	166160599	wt_k27_peak_1100	346	WT	WT Specific
chr1	166413151	166413465	chr1	166413151	166413465	wt_k27_peak_1108	314	WT	WT Specific
chr1	167657376	167657633	chr1	167657376	167657633	wt_k27_peak_1128	257	WT	WT Specific
chr1	167700686	167700997	chr1	167700686	167700997	wt_k27_peak_1136	311	WT	WT Specific
chr1	167935586	167936068	chr1	167935586	167936068	wt_k27_peak_1142	482	WT	WT Specific
chr1	168222534	168222925	chr1	168222534	168222925	wt_k27_peak_1145	391	WT	WT Specific
chr1	169978829	169979171	chr1	169978829	169979171	wt_k27_peak_1152	342	WT	WT Specific
chr1	170902920	170903619	chr1	170902920	170903619	wt_k27_peak_1157	699	WT	WT Specific
chr1	171582519	171582804	chr1	171582519	171582804	wt_k27_peak_1179	285	WT	WT Specific
chr1	172479128	172479449	chr1	172479128	172479449	wt_k27_peak_1202	321	WT	WT Specific
chr1	172495214	172495696	chr1	172495214	172495696	wt_k27_peak_1203	482	WT	WT Specific
chr1	172555736	172556004	chr1	172555736	172556004	wt_k27_peak_1221	268	WT	WT Specific
chr1	172601145	172601513	chr1	172601145	172601513	wt_k27_peak_1230	368	WT	WT Specific
chr1	173376556	173376996	chr1	173376556	173376996	wt_k27_peak_1237	440	WT	WT Specific
chr1	174922483	174922740	chr1	174922483	174922740	wt_k27_peak_1241	257	WT	WT Specific
chr1	175505821	175506078	chr1	175505821	175506078	wt_k27_peak_1244	257	WT	WT Specific
chr1	177262200	177262487	chr1	177262200	177262487	wt_k27_peak_1250	287	WT	WT Specific
chr1	177339999	177340585	chr1	177339999	177340585	wt_k27_peak_1253	586	WT	WT Specific
chr1	177437582	177438085	chr1	177437582	177438085	wt_k27_peak_1255	503	WT	WT Specific
chr1	177456470	177456927	chr1	177456470	177456927	wt_k27_peak_1259	457	WT	WT Specific
chr1	178364897	178365243	chr1	178364897	178365243	wt_k27_peak_1263	346	WT	WT Specific
chr1	178367846	178368103	chr1	178367846	178368103	wt_k27_peak_1264	257	WT	WT Specific
chr1	178402844	178403244	chr1	178402844	178403244	wt_k27_peak_1265	400	WT	WT Specific
chr1	178573560	178573853	chr1	178573560	178573853	wt_k27_peak_1271	293	WT	WT Specific
chr1	180229851	180230216	chr1	180229851	180230216	wt_k27_peak_1281	365	WT	WT Specific
chr1	180262598	180262895	chr1	180262598	180262895	wt_k27_peak_1283	297	WT	WT Specific
chr1	180284469	180284886	chr1	180284469	180284886	wt_k27_peak_1287	417	WT	WT Specific
chr1	180832111	180832461	chr1	180832111	180832461	wt_k27_peak_1308	350	WT	WT Specific
chr1	181019424	181019826	chr1	181019424	181019826	wt_k27_peak_1312	402	WT	WT Specific
chr1	181078838	181079203	chr1	181078838	181079203	wt_k27_peak_1315	365	WT	WT Specific
chr1	181258096	181258353	chr1	181258096	181258353	wt_k27_peak_1316	257	WT	WT Specific
chr1	181349804	181350211	chr1	181349804	181350211	wt_k27_peak_1317	407	WT	WT Specific
chr1	181561164	181561463	chr1	181561164	181561463	wt_k27_peak_1319	299	WT	WT Specific
chr1	182767954	182768363	chr1	182767954	182768363	wt_k27_peak_1329	409	WT	WT Specific
chr1	182960554	182961028	chr1	182960554	182961028	wt_k27_peak_1332	474	WT	WT Specific
chr1	184738717	184739039	chr1	184738717	184739039	wt_k27_peak_1343	322	WT	WT Specific
chr1	184807792	184808112	chr1	184807792	184808112	wt_k27_peak_1346	320	WT	WT Specific
chr1	186830763	186831234	chr1	186830763	186831234	wt_k27_peak_1360	471	WT	WT Specific
chr1	187650310	187650640	chr1	187650310	187650640	wt_k27_peak_1363	330	WT	WT Specific
chr1	189732052	189732309	chr1	189732052	189732309	wt_k27_peak_1370	257	WT	WT Specific
chr1	189920971	189921935	chr1	189920971	189921935	wt_k27_peak_1371	964	WT	WT Specific
chr1	189972157	189972701	chr1	189972157	189972701	wt_k27_peak_1374	544	WT	WT Specific
chr1	190179978	190180553	chr1	190179978	190180553	wt_k27_peak_1381	575	WT	WT Specific
chr1	190447255	190447880	chr1	190447255	190447880	wt_k27_peak_1382	625	WT	WT Specific
chr1	191191303	191191680	chr1	191191303	191191680	wt_k27_peak_1392	377	WT	WT Specific
chr1	191928309	191930190	chr1	191928309	191930190	wt_k27_peak_1402	1881	WT	WT Specific
chr1	191986742	191987140	chr1	191986742	191987140	wt_k27_peak_1404	398	WT	WT Specific
chr1	192768794	192769091	chr1	192768794	192769091	wt_k27_peak_1408	297	WT	WT Specific
chr1	193184561	193184846	chr1	193184561	193184846	wt_k27_peak_1420	285	WT	WT Specific
chr1	193368065	193368755	chr1	193368065	193368755	wt_k27_peak_1422	690	WT	WT Specific
chr10	3267144	3267464	chr10	3267144	3267464	wt_k27_peak_1432	320	WT	WT Specific
chr10	4715355	4715668	chr10	4715355	4715668	wt_k27_peak_1439	313	WT	WT Specific
chr10	6787413	6788011	chr10	6787413	6788011	wt_k27_peak_1442	598	WT	WT Specific
chr10	6789377	6789977	chr10	6789377	6789977	wt_k27_peak_1443	600	WT	WT Specific
chr10	7779328	7779915	chr10	7779328	7779915	wt_k27_peak_1445	587	WT	WT Specific
chr10	7832931	7833368	chr10	7832931	7833368	wt_k27_peak_1446	437	WT	WT Specific
chr10	11450478	11450939	chr10	11450478	11450939	wt_k27_peak_1460	461	WT	WT Specific
chr10	13325794	13326362	chr10	13325794	13326362	wt_k27_peak_1472	568	WT	WT Specific
chr10	14554639	14555045	chr10	14554639	14555045	wt_k27_peak_1482	406	WT	WT Specific
chr10	17701616	17702263	chr10	17701616	17702263	wt_k27_peak_1484	647	WT	WT Specific
chr10	18544873	18545250	chr10	18544873	18545250	wt_k27_peak_1492	377	WT	WT Specific
chr10	21712190	21712666	chr10	21712190	21712666	wt_k27_peak_1525	476	WT	WT Specific
chr10	22837711	22837979	chr10	22837711	22837979	wt_k27_peak_1538	268	WT	WT Specific
chr10	24150111	24150552	chr10	24150111	24150552	wt_k27_peak_1544	441	WT	WT Specific
chr10	24534812	24535374	chr10	24534812	24535374	wt_k27_peak_1546	562	WT	WT Specific
chr10	26378400	26378674	chr10	26378400	26378674	wt_k27_peak_1553	274	WT	WT Specific
chr10	30848946	30849263	chr10	30848946	30849263	wt_k27_peak_1569	317	WT	WT Specific
chr10	40021373	40022041	chr10	40021373	40022041	wt_k27_peak_1588	668	WT	WT Specific
chr10	40028171	40028629	chr10	40028171	40028629	wt_k27_peak_1590	458	WT	WT Specific
chr10	40611775	40612108	chr10	40611775	40612108	wt_k27_peak_1593	333	WT	WT Specific
chr10	41068733	41069040	chr10	41068733	41069040	wt_k27_peak_1599	307	WT	WT Specific
chr10	41888417	41888926	chr10	41888417	41888926	wt_k27_peak_1602	509	WT	WT Specific
chr10	42018745	42019503	chr10	42018745	42019503	wt_k27_peak_1604	758	WT	WT Specific
chr10	42293343	42293743	chr10	42293343	42293743	wt_k27_peak_1607	400	WT	WT Specific
chr10	42619757	42620014	chr10	42619757	42620014	wt_k27_peak_1617	257	WT	WT Specific
chr10	43009133	43009417	chr10	43009133	43009417	wt_k27_peak_1638	284	WT	WT Specific
chr10	43180474	43180869	chr10	43180474	43180869	wt_k27_peak_1645	395	WT	WT Specific
chr10	43450881	43451177	chr10	43450881	43451177	wt_k27_peak_1646	296	WT	WT Specific
chr10	43759979	43760314	chr10	43759979	43760314	wt_k27_peak_1656	335	WT	WT Specific
chr10	44008309	44008585	chr10	44008309	44008585	wt_k27_peak_1661	276	WT	WT Specific
chr10	46011481	46011772	chr10	46011481	46011772	wt_k27_peak_1675	291	WT	WT Specific
chr10	49785151	49785478	chr10	49785151	49785478	wt_k27_peak_1679	327	WT	WT Specific
chr10	50913818	50914112	chr10	50913818	50914112	wt_k27_peak_1683	294	WT	WT Specific
chr10	53697194	53697451	chr10	53697194	53697451	wt_k27_peak_1693	257	WT	WT Specific
chr10	53698847	53699415	chr10	53698847	53699415	wt_k27_peak_1694	568	WT	WT Specific
chr10	56227535	56228129	chr10	56227535	56228129	wt_k27_peak_1699	594	WT	WT Specific
chr10	56368644	56369072	chr10	56368644	56369072	wt_k27_peak_1700	428	WT	WT Specific
chr10	56742696	56742980	chr10	56742696	56742980	wt_k27_peak_1708	284	WT	WT Specific
chr10	59638038	59638299	chr10	59638038	59638299	wt_k27_peak_1729	261	WT	WT Specific
chr10	59942857	59943494	chr10	59942857	59943494	wt_k27_peak_1733	637	WT	WT Specific
chr10	59950214	59950479	chr10	59950214	59950479	wt_k27_peak_1734	265	WT	WT Specific
chr10	60190744	60191524	chr10	60190744	60191524	wt_k27_peak_1745	780	WT	WT Specific
chr10	60192361	60192781	chr10	60192361	60192781	wt_k27_peak_1746	420	WT	WT Specific
chr10	60215226	60215662	chr10	60215226	60215662	wt_k27_peak_1747	436	WT	WT Specific
chr10	60468190	60468456	chr10	60468190	60468456	wt_k27_peak_1750	266	WT	WT Specific
chr10	60477500	60477795	chr10	60477500	60477795	wt_k27_peak_1752	295	WT	WT Specific
chr10	60812616	60812888	chr10	60812616	60812888	wt_k27_peak_1760	272	WT	WT Specific
chr10	61177651	61178109	chr10	61177651	61178109	wt_k27_peak_1768	458	WT	WT Specific
chr10	61246352	61246737	chr10	61246352	61246737	wt_k27_peak_1769	385	WT	WT Specific
chr10	61385452	61385844	chr10	61385452	61385844	wt_k27_peak_1772	392	WT	WT Specific
chr10	61388156	61388508	chr10	61388156	61388508	wt_k27_peak_1773	352	WT	WT Specific
chr10	61713603	61713931	chr10	61713603	61713931	wt_k27_peak_1780	328	WT	WT Specific
chr10	62136678	62137132	chr10	62136678	62137132	wt_k27_peak_1797	454	WT	WT Specific
chr10	62241846	62242255	chr10	62241846	62242255	wt_k27_peak_1798	409	WT	WT Specific
chr10	63061886	63062883	chr10	63061886	63062883	wt_k27_peak_1810	997	WT	WT Specific
chr10	64094501	64094837	chr10	64094501	64094837	wt_k27_peak_1821	336	WT	WT Specific
chr10	66930749	66931027	chr10	66930749	66931027	wt_k27_peak_1825	278	WT	WT Specific
chr10	69573011	69573477	chr10	69573011	69573477	wt_k27_peak_1844	466	WT	WT Specific
chr10	69921228	69921642	chr10	69921228	69921642	wt_k27_peak_1845	414	WT	WT Specific
chr10	70249102	70249550	chr10	70249102	70249550	wt_k27_peak_1850	448	WT	WT Specific
chr10	71287987	71288421	chr10	71287987	71288421	wt_k27_peak_1866	434	WT	WT Specific
chr10	74922147	74922413	chr10	74922147	74922413	wt_k27_peak_1874	266	WT	WT Specific
chr10	75049319	75049686	chr10	75049319	75049686	wt_k27_peak_1880	367	WT	WT Specific
chr10	75334007	75334284	chr10	75334007	75334284	wt_k27_peak_1885	277	WT	WT Specific
chr10	75335213	75335498	chr10	75335213	75335498	wt_k27_peak_1886	285	WT	WT Specific
chr10	75556108	75556469	chr10	75556108	75556469	wt_k27_peak_1889	361	WT	WT Specific
chr10	75783438	75784541	chr10	75783438	75784541	wt_k27_peak_1896	1103	WT	WT Specific
chr10	76972852	76973153	chr10	76972852	76973153	wt_k27_peak_1910	301	WT	WT Specific
chr10	77975659	77975921	chr10	77975659	77975921	wt_k27_peak_1918	262	WT	WT Specific
chr10	78091901	78092202	chr10	78091901	78092202	wt_k27_peak_1919	301	WT	WT Specific
chr10	78093101	78093416	chr10	78093101	78093416	wt_k27_peak_1920	315	WT	WT Specific
chr10	78572910	78573628	chr10	78572910	78573628	wt_k27_peak_1941	718	WT	WT Specific
chr10	78631622	78631925	chr10	78631622	78631925	wt_k27_peak_1943	303	WT	WT Specific
chr10	78782357	78782993	chr10	78782357	78782993	wt_k27_peak_1946	636	WT	WT Specific
chr10	79593009	79593574	chr10	79593009	79593574	wt_k27_peak_1949	565	WT	WT Specific
chr10	79878461	79878809	chr10	79878461	79878809	wt_k27_peak_1969	348	WT	WT Specific
chr10	79929000	79929684	chr10	79929000	79929684	wt_k27_peak_1974	684	WT	WT Specific
chr10	79998251	79998912	chr10	79998251	79998912	wt_k27_peak_1978	661	WT	WT Specific
chr10	80325932	80326419	chr10	80325932	80326419	wt_k27_peak_1998	487	WT	WT Specific
chr10	80330590	80331017	chr10	80330590	80331017	wt_k27_peak_1999	427	WT	WT Specific
chr10	80468030	80468478	chr10	80468030	80468478	wt_k27_peak_2014	448	WT	WT Specific
chr10	80518082	80518862	chr10	80518082	80518862	wt_k27_peak_2027	780	WT	WT Specific
chr10	80537957	80538331	chr10	80537957	80538331	wt_k27_peak_2029	374	WT	WT Specific
chr10	80989318	80989706	chr10	80989318	80989706	wt_k27_peak_2042	388	WT	WT Specific
chr10	80997035	80997627	chr10	80997035	80997627	wt_k27_peak_2044	592	WT	WT Specific
chr10	81289883	81290202	chr10	81289883	81290202	wt_k27_peak_2057	319	WT	WT Specific
chr10	81419356	81419689	chr10	81419356	81419689	wt_k27_peak_2062	333	WT	WT Specific
chr10	81588636	81588964	chr10	81588636	81588964	wt_k27_peak_2087	328	WT	WT Specific
chr10	82036890	82037363	chr10	82036890	82037363	wt_k27_peak_2089	473	WT	WT Specific
chr10	82169908	82170362	chr10	82169908	82170362	wt_k27_peak_2091	454	WT	WT Specific
chr10	82182573	82182839	chr10	82182573	82182839	wt_k27_peak_2094	266	WT	WT Specific
chr10	83534694	83535307	chr10	83534694	83535307	wt_k27_peak_2104	613	WT	WT Specific
chr10	85186084	85186446	chr10	85186084	85186446	wt_k27_peak_2128	362	WT	WT Specific
chr10	88326854	88327194	chr10	88326854	88327194	wt_k27_peak_2153	340	WT	WT Specific
chr10	88723882	88724232	chr10	88723882	88724232	wt_k27_peak_2158	350	WT	WT Specific
chr10	88984534	88984791	chr10	88984534	88984791	wt_k27_peak_2162	257	WT	WT Specific
chr10	89447233	89447491	chr10	89447233	89447491	wt_k27_peak_2166	258	WT	WT Specific
chr10	90726035	90726387	chr10	90726035	90726387	wt_k27_peak_2175	352	WT	WT Specific
chr10	90884707	90885055	chr10	90884707	90885055	wt_k27_peak_2182	348	WT	WT Specific
chr10	93083752	93084341	chr10	93083752	93084341	wt_k27_peak_2188	589	WT	WT Specific
chr10	94314077	94314453	chr10	94314077	94314453	wt_k27_peak_2206	376	WT	WT Specific
chr10	94524000	94524257	chr10	94524000	94524257	wt_k27_peak_2210	257	WT	WT Specific
chr10	95599092	95599356	chr10	95599092	95599356	wt_k27_peak_2221	264	WT	WT Specific
chr10	95612361	95612619	chr10	95612361	95612619	wt_k27_peak_2224	258	WT	WT Specific
chr10	99464667	99465151	chr10	99464667	99465151	wt_k27_peak_2245	484	WT	WT Specific
chr10	99465600	99466218	chr10	99465600	99466218	wt_k27_peak_2246	618	WT	WT Specific
chr10	100010273	100010658	chr10	100010273	100010658	wt_k27_peak_2250	385	WT	WT Specific
chr10	103023705	103024180	chr10	103023705	103024180	wt_k27_peak_2254	475	WT	WT Specific
chr10	110451640	110451957	chr10	110451640	110451957	wt_k27_peak_2270	317	WT	WT Specific
chr10	110452622	110452989	chr10	110452622	110452989	wt_k27_peak_2271	367	WT	WT Specific
chr10	111013801	111014237	chr10	111013801	111014237	wt_k27_peak_2276	436	WT	WT Specific
chr10	111035181	111035554	chr10	111035181	111035554	wt_k27_peak_2277	373	WT	WT Specific
chr10	111516963	111517313	chr10	111516963	111517313	wt_k27_peak_2284	350	WT	WT Specific
chr10	115479012	115479323	chr10	115479012	115479323	wt_k27_peak_2301	311	WT	WT Specific
chr10	115595641	115596092	chr10	115595641	115596092	wt_k27_peak_2303	451	WT	WT Specific
chr10	117207015	117207431	chr10	117207015	117207431	wt_k27_peak_2320	416	WT	WT Specific
chr10	117230519	117230776	chr10	117230519	117230776	wt_k27_peak_2321	257	WT	WT Specific
chr10	117416630	117417459	chr10	117416630	117417459	wt_k27_peak_2324	829	WT	WT Specific
chr10	117478862	117479387	chr10	117478862	117479387	wt_k27_peak_2335	525	WT	WT Specific
chr10	117494356	117494837	chr10	117494356	117494837	wt_k27_peak_2336	481	WT	WT Specific
chr10	117888569	117889002	chr10	117888569	117889002	wt_k27_peak_2350	433	WT	WT Specific
chr10	117904939	117905236	chr10	117904939	117905236	wt_k27_peak_2351	297	WT	WT Specific
chr10	118105394	118106146	chr10	118105394	118106146	wt_k27_peak_2353	752	WT	WT Specific
chr10	119301792	119302071	chr10	119301792	119302071	wt_k27_peak_2362	279	WT	WT Specific
chr10	119302956	119303314	chr10	119302956	119303314	wt_k27_peak_2363	358	WT	WT Specific
chr10	120238043	120238511	chr10	120238043	120238511	wt_k27_peak_2369	468	WT	WT Specific
chr10	120271201	120271620	chr10	120271201	120271620	wt_k27_peak_2370	419	WT	WT Specific
chr10	120397605	120398306	chr10	120397605	120398306	wt_k27_peak_2376	701	WT	WT Specific
chr10	120415874	120416202	chr10	120415874	120416202	wt_k27_peak_2377	328	WT	WT Specific
chr10	120554991	120555869	chr10	120554991	120555869	wt_k27_peak_2381	878	WT	WT Specific
chr10	120734724	120735021	chr10	120734724	120735021	wt_k27_peak_2388	297	WT	WT Specific
chr10	121268505	121269031	chr10	121268505	121269031	wt_k27_peak_2406	526	WT	WT Specific
chr10	121287560	121287937	chr10	121287560	121287937	wt_k27_peak_2407	377	WT	WT Specific
chr10	121366095	121366727	chr10	121366095	121366727	wt_k27_peak_2416	632	WT	WT Specific
chr10	121858302	121858591	chr10	121858302	121858591	wt_k27_peak_2426	289	WT	WT Specific
chr10	125845990	125846453	chr10	125845990	125846453	wt_k27_peak_2445	463	WT	WT Specific
chr10	126369718	126370088	chr10	126369718	126370088	wt_k27_peak_2448	370	WT	WT Specific
chr10	126862459	126862757	chr10	126862459	126862757	wt_k27_peak_2450	298	WT	WT Specific
chr10	126930285	126930733	chr10	126930285	126930733	wt_k27_peak_2453	448	WT	WT Specific
chr10	127006958	127007814	chr10	127006958	127007814	wt_k27_peak_2457	856	WT	WT Specific
chr10	127017603	127018184	chr10	127017603	127018184	wt_k27_peak_2459	581	WT	WT Specific
chr10	127322531	127322843	chr10	127322531	127322843	wt_k27_peak_2473	312	WT	WT Specific
chr10	127522881	127523157	chr10	127522881	127523157	wt_k27_peak_2479	276	WT	WT Specific
chr10	127565913	127566393	chr10	127565913	127566393	wt_k27_peak_2481	480	WT	WT Specific
chr10	127640426	127640950	chr10	127640426	127640950	wt_k27_peak_2483	524	WT	WT Specific
chr10	128530413	128530864	chr10	128530413	128530864	wt_k27_peak_2501	451	WT	WT Specific
chr10	128588234	128588808	chr10	128588234	128588808	wt_k27_peak_2502	574	WT	WT Specific
chr11	3881267	3881687	chr11	3881267	3881687	wt_k27_peak_2537	420	WT	WT Specific
chr11	4072824	4073164	chr11	4072824	4073164	wt_k27_peak_2541	340	WT	WT Specific
chr11	9114765	9115075	chr11	9114765	9115075	wt_k27_peak_2586	310	WT	WT Specific
chr11	16756579	16756836	chr11	16756579	16756836	wt_k27_peak_2603	257	WT	WT Specific
chr11	24069189	24069446	chr11	24069189	24069446	wt_k27_peak_2658	257	WT	WT Specific
chr11	29013256	29013747	chr11	29013256	29013747	wt_k27_peak_2678	491	WT	WT Specific
chr11	30271946	30272535	chr11	30271946	30272535	wt_k27_peak_2684	589	WT	WT Specific
chr11	35006816	35007204	chr11	35006816	35007204	wt_k27_peak_2732	388	WT	WT Specific
chr11	39673377	39673747	chr11	39673377	39673747	wt_k27_peak_2755	370	WT	WT Specific
chr11	44398450	44398755	chr11	44398450	44398755	wt_k27_peak_2778	305	WT	WT Specific
chr11	44829757	44830208	chr11	44829757	44830208	wt_k27_peak_2788	451	WT	WT Specific
chr11	45974369	45974772	chr11	45974369	45974772	wt_k27_peak_2791	403	WT	WT Specific
chr11	45994150	45994563	chr11	45994150	45994563	wt_k27_peak_2797	413	WT	WT Specific
chr11	52915754	52916385	chr11	52915754	52916385	wt_k27_peak_2867	631	WT	WT Specific
chr11	60828142	60828607	chr11	60828142	60828607	wt_k27_peak_2980	465	WT	WT Specific
chr11	62834116	62834563	chr11	62834116	62834563	wt_k27_peak_3021	447	WT	WT Specific
chr11	64431570	64431870	chr11	64431570	64431870	wt_k27_peak_3036	300	WT	WT Specific
chr11	68440720	68441102	chr11	68440720	68441102	wt_k27_peak_3068	382	WT	WT Specific
chr11	68956271	68956774	chr11	68956271	68956774	wt_k27_peak_3080	503	WT	WT Specific
chr11	69859091	69859464	chr11	69859091	69859464	wt_k27_peak_3147	373	WT	WT Specific
chr11	70692420	70692861	chr11	70692420	70692861	wt_k27_peak_3185	441	WT	WT Specific
chr11	72249386	72249838	chr11	72249386	72249838	wt_k27_peak_3200	452	WT	WT Specific
chr11	72318322	72318608	chr11	72318322	72318608	wt_k27_peak_3205	286	WT	WT Specific
chr11	74372303	74372600	chr11	74372303	74372600	wt_k27_peak_3221	297	WT	WT Specific
chr11	74611883	74612157	chr11	74611883	74612157	wt_k27_peak_3227	274	WT	WT Specific
chr11	75482704	75483036	chr11	75482704	75483036	wt_k27_peak_3249	332	WT	WT Specific
chr11	77194999	77195541	chr11	77194999	77195541	wt_k27_peak_3286	542	WT	WT Specific
chr11	77646188	77646501	chr11	77646188	77646501	wt_k27_peak_3299	313	WT	WT Specific
chr11	79144317	79144649	chr11	79144317	79144649	wt_k27_peak_3348	332	WT	WT Specific
chr11	79329011	79329439	chr11	79329011	79329439	wt_k27_peak_3352	428	WT	WT Specific
chr11	82379907	82380237	chr11	82379907	82380237	wt_k27_peak_3384	330	WT	WT Specific
chr11	83281796	83282288	chr11	83281796	83282288	wt_k27_peak_3413	492	WT	WT Specific
chr11	85158872	85159191	chr11	85158872	85159191	wt_k27_peak_3447	319	WT	WT Specific
chr11	87918541	87919204	chr11	87918541	87919204	wt_k27_peak_3502	663	WT	WT Specific
chr11	93762114	93762530	chr11	93762114	93762530	wt_k27_peak_3555	416	WT	WT Specific
chr11	93771345	93771828	chr11	93771345	93771828	wt_k27_peak_3556	483	WT	WT Specific
chr11	94713829	94714086	chr11	94713829	94714086	wt_k27_peak_3582	257	WT	WT Specific
chr11	95040457	95041004	chr11	95040457	95041004	wt_k27_peak_3612	547	WT	WT Specific
chr11	95516126	95516508	chr11	95516126	95516508	wt_k27_peak_3634	382	WT	WT Specific
chr11	96234470	96234907	chr11	96234470	96234907	wt_k27_peak_3669	437	WT	WT Specific
chr11	96247300	96247557	chr11	96247300	96247557	wt_k27_peak_3672	257	WT	WT Specific
chr11	96417668	96417925	chr11	96417668	96417925	wt_k27_peak_3683	257	WT	WT Specific
chr11	96437101	96437452	chr11	96437101	96437452	wt_k27_peak_3684	351	WT	WT Specific
chr11	97092835	97093336	chr11	97092835	97093336	wt_k27_peak_3720	501	WT	WT Specific
chr11	97101055	97101344	chr11	97101055	97101344	wt_k27_peak_3721	289	WT	WT Specific
chr11	97125008	97125288	chr11	97125008	97125288	wt_k27_peak_3724	280	WT	WT Specific
chr11	97589251	97589534	chr11	97589251	97589534	wt_k27_peak_3756	283	WT	WT Specific
chr11	97628152	97628447	chr11	97628152	97628447	wt_k27_peak_3758	295	WT	WT Specific
chr11	97857803	97858354	chr11	97857803	97858354	wt_k27_peak_3761	551	WT	WT Specific
chr11	98404637	98404938	chr11	98404637	98404938	wt_k27_peak_3778	301	WT	WT Specific
chr11	101886040	101886518	chr11	101886040	101886518	wt_k27_peak_3900	478	WT	WT Specific
chr11	102723016	102723624	chr11	102723016	102723624	wt_k27_peak_3963	608	WT	WT Specific
chr11	103151400	103152178	chr11	103151400	103152178	wt_k27_peak_3988	778	WT	WT Specific
chr11	104129606	104129863	chr11	104129606	104129863	wt_k27_peak_4023	257	WT	WT Specific
chr11	110779985	110780338	chr11	110779985	110780338	wt_k27_peak_4104	353	WT	WT Specific
chr11	115986716	115987030	chr11	115986716	115987030	wt_k27_peak_4208	314	WT	WT Specific
chr11	116026274	116026733	chr11	116026274	116026733	wt_k27_peak_4211	459	WT	WT Specific
chr11	116698408	116698804	chr11	116698408	116698804	wt_k27_peak_4239	396	WT	WT Specific
chr11	116884268	116884649	chr11	116884268	116884649	wt_k27_peak_4242	381	WT	WT Specific
chr11	117003230	117003487	chr11	117003230	117003487	wt_k27_peak_4249	257	WT	WT Specific
chr11	117003971	117004575	chr11	117003971	117004575	wt_k27_peak_4250	604	WT	WT Specific
chr11	117415724	117416011	chr11	117415724	117416011	wt_k27_peak_4271	287	WT	WT Specific
chr11	117946930	117947287	chr11	117946930	117947287	wt_k27_peak_4283	357	WT	WT Specific
chr11	118608893	118609961	chr11	118608893	118609961	wt_k27_peak_4300	1068	WT	WT Specific
chr11	118898871	118899200	chr11	118898871	118899200	wt_k27_peak_4305	329	WT	WT Specific
chr12	3920800	3921500	chr12	3920800	3921500	wt_k27_peak_4381	700	WT	WT Specific
chr12	3922230	3922588	chr12	3922230	3922588	wt_k27_peak_4382	358	WT	WT Specific
chr12	3983266	3983604	chr12	3983266	3983604	wt_k27_peak_4386	338	WT	WT Specific
chr12	4591567	4591824	chr12	4591567	4591824	wt_k27_peak_4395	257	WT	WT Specific
chr12	5123216	5123906	chr12	5123216	5123906	wt_k27_peak_4402	690	WT	WT Specific
chr12	10441122	10442086	chr12	10441122	10442086	wt_k27_peak_4430	964	WT	WT Specific
chr12	11178375	11178642	chr12	11178375	11178642	wt_k27_peak_4433	267	WT	WT Specific
chr12	12910813	12911128	chr12	12910813	12911128	wt_k27_peak_4454	315	WT	WT Specific
chr12	13070302	13070682	chr12	13070302	13070682	wt_k27_peak_4457	380	WT	WT Specific
chr12	14157377	14157953	chr12	14157377	14157953	wt_k27_peak_4468	576	WT	WT Specific
chr12	14158313	14158957	chr12	14158313	14158957	wt_k27_peak_4469	644	WT	WT Specific
chr12	16998820	16999148	chr12	16998820	16999148	wt_k27_peak_4477	328	WT	WT Specific
chr12	17015023	17015280	chr12	17015023	17015280	wt_k27_peak_4479	257	WT	WT Specific
chr12	17329945	17330294	chr12	17329945	17330294	wt_k27_peak_4484	349	WT	WT Specific
chr12	17540611	17540949	chr12	17540611	17540949	wt_k27_peak_4485	338	WT	WT Specific
chr12	24686117	24686452	chr12	24686117	24686452	wt_k27_peak_4493	335	WT	WT Specific
chr12	25276096	25276392	chr12	25276096	25276392	wt_k27_peak_4501	296	WT	WT Specific
chr12	25417539	25417796	chr12	25417539	25417796	wt_k27_peak_4502	257	WT	WT Specific
chr12	26904669	26905072	chr12	26904669	26905072	wt_k27_peak_4508	403	WT	WT Specific
chr12	27328584	27329061	chr12	27328584	27329061	wt_k27_peak_4522	477	WT	WT Specific
chr12	27330415	27330930	chr12	27330415	27330930	wt_k27_peak_4523	515	WT	WT Specific
chr12	30584928	30585601	chr12	30584928	30585601	wt_k27_peak_4541	673	WT	WT Specific
chr12	30598016	30598551	chr12	30598016	30598551	wt_k27_peak_4542	535	WT	WT Specific
chr12	30877877	30878663	chr12	30877877	30878663	wt_k27_peak_4543	786	WT	WT Specific
chr12	30912897	30913381	chr12	30912897	30913381	wt_k27_peak_4545	484	WT	WT Specific
chr12	31094618	31095704	chr12	31094618	31095704	wt_k27_peak_4548	1086	WT	WT Specific
chr12	32806685	32807048	chr12	32806685	32807048	wt_k27_peak_4557	363	WT	WT Specific
chr12	33026037	33026560	chr12	33026037	33026560	wt_k27_peak_4562	523	WT	WT Specific
chr12	33951640	33951964	chr12	33951640	33951964	wt_k27_peak_4577	324	WT	WT Specific
chr12	35832847	35833104	chr12	35832847	35833104	wt_k27_peak_4583	257	WT	WT Specific
chr12	36041133	36041403	chr12	36041133	36041403	wt_k27_peak_4591	270	WT	WT Specific
chr12	36287814	36288281	chr12	36287814	36288281	wt_k27_peak_4593	467	WT	WT Specific
chr12	36380828	36381340	chr12	36380828	36381340	wt_k27_peak_4596	512	WT	WT Specific
chr12	36384781	36385620	chr12	36384781	36385620	wt_k27_peak_4598	839	WT	WT Specific
chr12	45077349	45077854	chr12	45077349	45077854	wt_k27_peak_4611	505	WT	WT Specific
chr12	46400367	46401045	chr12	46400367	46401045	wt_k27_peak_4613	678	WT	WT Specific
chr12	52919639	52919945	chr12	52919639	52919945	wt_k27_peak_4627	306	WT	WT Specific
chr12	53263106	53264221	chr12	53263106	53264221	wt_k27_peak_4630	1115	WT	WT Specific
chr12	54993066	54993323	chr12	54993066	54993323	wt_k27_peak_4642	257	WT	WT Specific
chr12	56462081	56462509	chr12	56462081	56462509	wt_k27_peak_4656	428	WT	WT Specific
chr12	56543350	56543737	chr12	56543350	56543737	wt_k27_peak_4661	387	WT	WT Specific
chr12	59306638	59307168	chr12	59306638	59307168	wt_k27_peak_4680	530	WT	WT Specific
chr12	64934896	64935303	chr12	64934896	64935303	wt_k27_peak_4685	407	WT	WT Specific
chr12	69122529	69122794	chr12	69122529	69122794	wt_k27_peak_4688	265	WT	WT Specific
chr12	69989125	69989757	chr12	69989125	69989757	wt_k27_peak_4703	632	WT	WT Specific
chr12	70352988	70353278	chr12	70352988	70353278	wt_k27_peak_4712	290	WT	WT Specific
chr12	70451561	70452615	chr12	70451561	70452615	wt_k27_peak_4714	1054	WT	WT Specific
chr12	71774156	71775268	chr12	71774156	71775268	wt_k27_peak_4724	1112	WT	WT Specific
chr12	72491129	72491668	chr12	72491129	72491668	wt_k27_peak_4733	539	WT	WT Specific
chr12	72916774	72917073	chr12	72916774	72917073	wt_k27_peak_4743	299	WT	WT Specific
chr12	72951482	72951944	chr12	72951482	72951944	wt_k27_peak_4746	462	WT	WT Specific
chr12	73054414	73054840	chr12	73054414	73054840	wt_k27_peak_4750	426	WT	WT Specific
chr12	73518635	73519516	chr12	73518635	73519516	wt_k27_peak_4754	881	WT	WT Specific
chr12	74294044	74294738	chr12	74294044	74294738	wt_k27_peak_4767	694	WT	WT Specific
chr12	75171674	75172354	chr12	75171674	75172354	wt_k27_peak_4768	680	WT	WT Specific
chr12	75182834	75183109	chr12	75182834	75183109	wt_k27_peak_4771	275	WT	WT Specific
chr12	75367029	75367371	chr12	75367029	75367371	wt_k27_peak_4773	342	WT	WT Specific
chr12	75739699	75740092	chr12	75739699	75740092	wt_k27_peak_4777	393	WT	WT Specific
chr12	76414627	76415011	chr12	76414627	76415011	wt_k27_peak_4790	384	WT	WT Specific
chr12	76426522	76426874	chr12	76426522	76426874	wt_k27_peak_4792	352	WT	WT Specific
chr12	76595391	76595766	chr12	76595391	76595766	wt_k27_peak_4801	375	WT	WT Specific
chr12	77048268	77048743	chr12	77048268	77048743	wt_k27_peak_4812	475	WT	WT Specific
chr12	77916954	77917324	chr12	77916954	77917324	wt_k27_peak_4815	370	WT	WT Specific
chr12	79967756	79968160	chr12	79967756	79968160	wt_k27_peak_4830	404	WT	WT Specific
chr12	79992865	79993290	chr12	79992865	79993290	wt_k27_peak_4832	425	WT	WT Specific
chr12	80037861	80038127	chr12	80037861	80038127	wt_k27_peak_4839	266	WT	WT Specific
chr12	80094480	80094774	chr12	80094480	80094774	wt_k27_peak_4840	294	WT	WT Specific
chr12	80742741	80743078	chr12	80742741	80743078	wt_k27_peak_4849	337	WT	WT Specific
chr12	80744346	80744897	chr12	80744346	80744897	wt_k27_peak_4850	551	WT	WT Specific
chr12	80748507	80748814	chr12	80748507	80748814	wt_k27_peak_4853	307	WT	WT Specific
chr12	80752051	80753094	chr12	80752051	80753094	wt_k27_peak_4855	1043	WT	WT Specific
chr12	80996813	80997412	chr12	80996813	80997412	wt_k27_peak_4859	599	WT	WT Specific
chr12	81335815	81336199	chr12	81335815	81336199	wt_k27_peak_4865	384	WT	WT Specific
chr12	83933461	83934029	chr12	83933461	83934029	wt_k27_peak_4887	568	WT	WT Specific
chr12	84240298	84240599	chr12	84240298	84240599	wt_k27_peak_4900	301	WT	WT Specific
chr12	84446194	84446782	chr12	84446194	84446782	wt_k27_peak_4903	588	WT	WT Specific
chr12	84872301	84872610	chr12	84872301	84872610	wt_k27_peak_4914	309	WT	WT Specific
chr12	85174035	85174366	chr12	85174035	85174366	wt_k27_peak_4923	331	WT	WT Specific
chr12	85184225	85184747	chr12	85184225	85184747	wt_k27_peak_4926	522	WT	WT Specific
chr12	85544032	85544382	chr12	85544032	85544382	wt_k27_peak_4932	350	WT	WT Specific
chr12	85595702	85596405	chr12	85595702	85596405	wt_k27_peak_4934	703	WT	WT Specific
chr12	86547425	86547885	chr12	86547425	86547885	wt_k27_peak_4956	460	WT	WT Specific
chr12	86659528	86659911	chr12	86659528	86659911	wt_k27_peak_4959	383	WT	WT Specific
chr12	87094724	87095187	chr12	87094724	87095187	wt_k27_peak_4973	463	WT	WT Specific
chr12	88579442	88579917	chr12	88579442	88579917	wt_k27_peak_4979	475	WT	WT Specific
chr12	88580847	88581196	chr12	88580847	88581196	wt_k27_peak_4980	349	WT	WT Specific
chr12	89107713	89108057	chr12	89107713	89108057	wt_k27_peak_4982	344	WT	WT Specific
chr12	89450003	89450260	chr12	89450003	89450260	wt_k27_peak_4984	257	WT	WT Specific
chr12	93151790	93152047	chr12	93151790	93152047	wt_k27_peak_4993	257	WT	WT Specific
chr12	95699743	95700209	chr12	95699743	95700209	wt_k27_peak_4995	466	WT	WT Specific
chr12	98741383	98741648	chr12	98741383	98741648	wt_k27_peak_5001	265	WT	WT Specific
chr12	99962366	99962861	chr12	99962366	99962861	wt_k27_peak_5021	495	WT	WT Specific
chr12	100198020	100198477	chr12	100198020	100198477	wt_k27_peak_5025	457	WT	WT Specific
chr12	100833810	100834096	chr12	100833810	100834096	wt_k27_peak_5027	286	WT	WT Specific
chr12	103535264	103536185	chr12	103535264	103536185	wt_k27_peak_5056	921	WT	WT Specific
chr12	104466384	104466899	chr12	104466384	104466899	wt_k27_peak_5059	515	WT	WT Specific
chr12	104905418	104905827	chr12	104905418	104905827	wt_k27_peak_5065	409	WT	WT Specific
chr12	105022877	105023171	chr12	105022877	105023171	wt_k27_peak_5068	294	WT	WT Specific
chr12	105766336	105766919	chr12	105766336	105766919	wt_k27_peak_5074	583	WT	WT Specific
chr12	105965514	105966192	chr12	105965514	105966192	wt_k27_peak_5080	678	WT	WT Specific
chr12	106137466	106137780	chr12	106137466	106137780	wt_k27_peak_5082	314	WT	WT Specific
chr12	107912798	107913124	chr12	107912798	107913124	wt_k27_peak_5103	326	WT	WT Specific
chr12	108541677	108542144	chr12	108541677	108542144	wt_k27_peak_5136	467	WT	WT Specific
chr12	108552866	108553627	chr12	108552866	108553627	wt_k27_peak_5138	761	WT	WT Specific
chr12	108558148	108558541	chr12	108558148	108558541	wt_k27_peak_5140	393	WT	WT Specific
chr12	109417248	109417615	chr12	109417248	109417615	wt_k27_peak_5157	367	WT	WT Specific
chr12	109463847	109464244	chr12	109463847	109464244	wt_k27_peak_5169	397	WT	WT Specific
chr12	109481416	109482676	chr12	109481416	109482676	wt_k27_peak_5172	1260	WT	WT Specific
chr12	109495611	109496150	chr12	109495611	109496150	wt_k27_peak_5174	539	WT	WT Specific
chr12	109612061	109612603	chr12	109612061	109612603	wt_k27_peak_5175	542	WT	WT Specific
chr12	110185645	110185933	chr12	110185645	110185933	wt_k27_peak_5178	288	WT	WT Specific
chr12	110192239	110192609	chr12	110192239	110192609	wt_k27_peak_5180	370	WT	WT Specific
chr12	110271214	110271583	chr12	110271214	110271583	wt_k27_peak_5183	369	WT	WT Specific
chr12	110720055	110720824	chr12	110720055	110720824	wt_k27_peak_5190	769	WT	WT Specific
chr12	111438305	111438791	chr12	111438305	111438791	wt_k27_peak_5208	486	WT	WT Specific
chr12	111439153	111439557	chr12	111439153	111439557	wt_k27_peak_5209	404	WT	WT Specific
chr12	111453309	111453803	chr12	111453309	111453803	wt_k27_peak_5212	494	WT	WT Specific
chr12	112090803	112091097	chr12	112090803	112091097	wt_k27_peak_5222	294	WT	WT Specific
chr12	112137704	112138171	chr12	112137704	112138171	wt_k27_peak_5225	467	WT	WT Specific
chr12	112698420	112698980	chr12	112698420	112698980	wt_k27_peak_5244	560	WT	WT Specific
chr12	112710096	112710412	chr12	112710096	112710412	wt_k27_peak_5248	316	WT	WT Specific
chr12	113180008	113180272	chr12	113180008	113180272	wt_k27_peak_5267	264	WT	WT Specific
chr12	116264833	116265433	chr12	116264833	116265433	wt_k27_peak_5272	600	WT	WT Specific
chr12	116638274	116638787	chr12	116638274	116638787	wt_k27_peak_5275	513	WT	WT Specific
chr12	117167511	117168191	chr12	117167511	117168191	wt_k27_peak_5279	680	WT	WT Specific
chr12	117246185	117246549	chr12	117246185	117246549	wt_k27_peak_5287	364	WT	WT Specific
chr12	117535292	117535609	chr12	117535292	117535609	wt_k27_peak_5298	317	WT	WT Specific
chr12	117834108	117834537	chr12	117834108	117834537	wt_k27_peak_5301	429	WT	WT Specific
chr13	8201482	8201805	chr13	8201482	8201805	wt_k27_peak_5320	323	WT	WT Specific
chr13	9762987	9763518	chr13	9762987	9763518	wt_k27_peak_5326	531	WT	WT Specific
chr13	12392203	12392647	chr13	12392203	12392647	wt_k27_peak_5333	444	WT	WT Specific
chr13	12703085	12703487	chr13	12703085	12703487	wt_k27_peak_5338	402	WT	WT Specific
chr13	21166028	21166429	chr13	21166028	21166429	wt_k27_peak_5354	401	WT	WT Specific
chr13	21321341	21321878	chr13	21321341	21321878	wt_k27_peak_5362	537	WT	WT Specific
chr13	21473230	21473790	chr13	21473230	21473790	wt_k27_peak_5366	560	WT	WT Specific
chr13	21701927	21702345	chr13	21701927	21702345	wt_k27_peak_5367	418	WT	WT Specific
chr13	23481517	23481789	chr13	23481517	23481789	wt_k27_peak_5383	272	WT	WT Specific
chr13	23707471	23708159	chr13	23707471	23708159	wt_k27_peak_5386	688	WT	WT Specific
chr13	23930887	23931375	chr13	23930887	23931375	wt_k27_peak_5389	488	WT	WT Specific
chr13	24614313	24614600	chr13	24614313	24614600	wt_k27_peak_5395	287	WT	WT Specific
chr13	24712972	24713444	chr13	24712972	24713444	wt_k27_peak_5397	472	WT	WT Specific
chr13	29861374	29861984	chr13	29861374	29861984	wt_k27_peak_5416	610	WT	WT Specific
chr13	29992363	29992684	chr13	29992363	29992684	wt_k27_peak_5419	321	WT	WT Specific
chr13	29993789	29994068	chr13	29993789	29994068	wt_k27_peak_5420	279	WT	WT Specific
chr13	30042614	30043188	chr13	30042614	30043188	wt_k27_peak_5421	574	WT	WT Specific
chr13	30334768	30335461	chr13	30334768	30335461	wt_k27_peak_5425	693	WT	WT Specific
chr13	31633649	31633966	chr13	31633649	31633966	wt_k27_peak_5436	317	WT	WT Specific
chr13	31817349	31817949	chr13	31817349	31817949	wt_k27_peak_5442	600	WT	WT Specific
chr13	32668423	32668807	chr13	32668423	32668807	wt_k27_peak_5445	384	WT	WT Specific
chr13	32992678	32992950	chr13	32992678	32992950	wt_k27_peak_5448	272	WT	WT Specific
chr13	33083078	33083466	chr13	33083078	33083466	wt_k27_peak_5449	388	WT	WT Specific
chr13	33997044	33997302	chr13	33997044	33997302	wt_k27_peak_5450	258	WT	WT Specific
chr13	34340904	34341187	chr13	34340904	34341187	wt_k27_peak_5458	283	WT	WT Specific
chr13	34915247	34915589	chr13	34915247	34915589	wt_k27_peak_5470	342	WT	WT Specific
chr13	35118649	35118975	chr13	35118649	35118975	wt_k27_peak_5474	326	WT	WT Specific
chr13	35884483	35885190	chr13	35884483	35885190	wt_k27_peak_5475	707	WT	WT Specific
chr13	35907170	35907738	chr13	35907170	35907738	wt_k27_peak_5476	568	WT	WT Specific
chr13	35949523	35949858	chr13	35949523	35949858	wt_k27_peak_5479	335	WT	WT Specific
chr13	37313036	37313657	chr13	37313036	37313657	wt_k27_peak_5483	621	WT	WT Specific
chr13	37472436	37472848	chr13	37472436	37472848	wt_k27_peak_5492	412	WT	WT Specific
chr13	38022204	38022536	chr13	38022204	38022536	wt_k27_peak_5512	332	WT	WT Specific
chr13	38156667	38157225	chr13	38156667	38157225	wt_k27_peak_5514	558	WT	WT Specific
chr13	38528886	38529247	chr13	38528886	38529247	wt_k27_peak_5518	361	WT	WT Specific
chr13	39646809	39647100	chr13	39646809	39647100	wt_k27_peak_5520	291	WT	WT Specific
chr13	41339582	41340003	chr13	41339582	41340003	wt_k27_peak_5540	421	WT	WT Specific
chr13	42044844	42045114	chr13	42044844	42045114	wt_k27_peak_5545	270	WT	WT Specific
chr13	43517398	43517895	chr13	43517398	43517895	wt_k27_peak_5559	497	WT	WT Specific
chr13	44472123	44472636	chr13	44472123	44472636	wt_k27_peak_5567	513	WT	WT Specific
chr13	44473152	44473634	chr13	44473152	44473634	wt_k27_peak_5568	482	WT	WT Specific
chr13	44647747	44648132	chr13	44647747	44648132	wt_k27_peak_5571	385	WT	WT Specific
chr13	45001094	45001393	chr13	45001094	45001393	wt_k27_peak_5573	299	WT	WT Specific
chr13	45077702	45078310	chr13	45077702	45078310	wt_k27_peak_5574	608	WT	WT Specific
chr13	46667714	46668059	chr13	46667714	46668059	wt_k27_peak_5588	345	WT	WT Specific
chr13	47894440	47894762	chr13	47894440	47894762	wt_k27_peak_5599	322	WT	WT Specific
chr13	48047225	48047612	chr13	48047225	48047612	wt_k27_peak_5600	387	WT	WT Specific
chr13	48228146	48228435	chr13	48228146	48228435	wt_k27_peak_5605	289	WT	WT Specific
chr13	48233269	48233680	chr13	48233269	48233680	wt_k27_peak_5607	411	WT	WT Specific
chr13	48258703	48259048	chr13	48258703	48259048	wt_k27_peak_5608	345	WT	WT Specific
chr13	49142577	49142863	chr13	49142577	49142863	wt_k27_peak_5631	286	WT	WT Specific
chr13	49227330	49227587	chr13	49227330	49227587	wt_k27_peak_5640	257	WT	WT Specific
chr13	49250672	49251004	chr13	49250672	49251004	wt_k27_peak_5642	332	WT	WT Specific
chr13	51170114	51170488	chr13	51170114	51170488	wt_k27_peak_5644	374	WT	WT Specific
chr13	51399532	51399909	chr13	51399532	51399909	wt_k27_peak_5646	377	WT	WT Specific
chr13	51792252	51792509	chr13	51792252	51792509	wt_k27_peak_5651	257	WT	WT Specific
chr13	51855455	51855827	chr13	51855455	51855827	wt_k27_peak_5657	372	WT	WT Specific
chr13	51914959	51915309	chr13	51914959	51915309	wt_k27_peak_5661	350	WT	WT Specific
chr13	52225567	52225850	chr13	52225567	52225850	wt_k27_peak_5663	283	WT	WT Specific
chr13	53392698	53392958	chr13	53392698	53392958	wt_k27_peak_5677	260	WT	WT Specific
chr13	53753075	53753409	chr13	53753075	53753409	wt_k27_peak_5688	334	WT	WT Specific
chr13	54058644	54059131	chr13	54058644	54059131	wt_k27_peak_5691	487	WT	WT Specific
chr13	54171980	54172409	chr13	54171980	54172409	wt_k27_peak_5700	429	WT	WT Specific
chr13	54480600	54480980	chr13	54480600	54480980	wt_k27_peak_5710	380	WT	WT Specific
chr13	54786360	54787385	chr13	54786360	54787385	wt_k27_peak_5724	1025	WT	WT Specific
chr13	54943344	54943744	chr13	54943344	54943744	wt_k27_peak_5733	400	WT	WT Specific
chr13	55369898	55370350	chr13	55369898	55370350	wt_k27_peak_5740	452	WT	WT Specific
chr13	55377367	55377736	chr13	55377367	55377736	wt_k27_peak_5744	369	WT	WT Specific
chr13	55984159	55984521	chr13	55984159	55984521	wt_k27_peak_5767	362	WT	WT Specific
chr13	56211774	56213326	chr13	56211774	56213326	wt_k27_peak_5777	1552	WT	WT Specific
chr13	56213698	56214074	chr13	56213698	56214074	wt_k27_peak_5778	376	WT	WT Specific
chr13	56281448	56282141	chr13	56281448	56282141	wt_k27_peak_5791	693	WT	WT Specific
chr13	56435245	56435596	chr13	56435245	56435596	wt_k27_peak_5796	351	WT	WT Specific
chr13	56606502	56607380	chr13	56606502	56607380	wt_k27_peak_5798	878	WT	WT Specific
chr13	56764939	56765333	chr13	56764939	56765333	wt_k27_peak_5805	394	WT	WT Specific
chr13	56766050	56766429	chr13	56766050	56766429	wt_k27_peak_5806	379	WT	WT Specific
chr13	57985091	57985475	chr13	57985091	57985475	wt_k27_peak_5818	384	WT	WT Specific
chr13	58113969	58114240	chr13	58113969	58114240	wt_k27_peak_5822	271	WT	WT Specific
chr13	58471944	58472267	chr13	58471944	58472267	wt_k27_peak_5832	323	WT	WT Specific
chr13	58527293	58527736	chr13	58527293	58527736	wt_k27_peak_5836	443	WT	WT Specific
chr13	58610373	58610686	chr13	58610373	58610686	wt_k27_peak_5837	313	WT	WT Specific
chr13	58631446	58631992	chr13	58631446	58631992	wt_k27_peak_5838	546	WT	WT Specific
chr13	59727169	59727604	chr13	59727169	59727604	wt_k27_peak_5852	435	WT	WT Specific
chr13	59851810	59852073	chr13	59851810	59852073	wt_k27_peak_5853	263	WT	WT Specific
chr13	60059802	60060123	chr13	60059802	60060123	wt_k27_peak_5854	321	WT	WT Specific
chr13	60170111	60170556	chr13	60170111	60170556	wt_k27_peak_5855	445	WT	WT Specific
chr13	62206136	62206405	chr13	62206136	62206405	wt_k27_peak_5862	269	WT	WT Specific
chr13	62885412	62885742	chr13	62885412	62885742	wt_k27_peak_5865	330	WT	WT Specific
chr13	63488807	63489303	chr13	63488807	63489303	wt_k27_peak_5867	496	WT	WT Specific
chr13	65175617	65176027	chr13	65175617	65176027	wt_k27_peak_5883	410	WT	WT Specific
chr13	67530019	67530377	chr13	67530019	67530377	wt_k27_peak_5887	358	WT	WT Specific
chr13	68601611	68601969	chr13	68601611	68601969	wt_k27_peak_5892	358	WT	WT Specific
chr13	69691791	69692142	chr13	69691791	69692142	wt_k27_peak_5899	351	WT	WT Specific
chr13	71853652	71853928	chr13	71853652	71853928	wt_k27_peak_5915	276	WT	WT Specific
chr13	72121057	72122127	chr13	72121057	72122127	wt_k27_peak_5918	1070	WT	WT Specific
chr13	72898470	72898826	chr13	72898470	72898826	wt_k27_peak_5932	356	WT	WT Specific
chr13	73009116	73009510	chr13	73009116	73009510	wt_k27_peak_5933	394	WT	WT Specific
chr13	73309349	73309798	chr13	73309349	73309798	wt_k27_peak_5938	449	WT	WT Specific
chr13	74005859	74006338	chr13	74005859	74006338	wt_k27_peak_5944	479	WT	WT Specific
chr13	74076146	74076624	chr13	74076146	74076624	wt_k27_peak_5947	478	WT	WT Specific
chr13	74080708	74081082	chr13	74080708	74081082	wt_k27_peak_5948	374	WT	WT Specific
chr13	74234912	74235344	chr13	74234912	74235344	wt_k27_peak_5951	432	WT	WT Specific
chr13	74257623	74257881	chr13	74257623	74257881	wt_k27_peak_5952	258	WT	WT Specific
chr13	76023171	76023436	chr13	76023171	76023436	wt_k27_peak_5965	265	WT	WT Specific
chr13	83749546	83749921	chr13	83749546	83749921	wt_k27_peak_5987	375	WT	WT Specific
chr13	89537803	89538160	chr13	89537803	89538160	wt_k27_peak_5999	357	WT	WT Specific
chr13	91163928	91164439	chr13	91163928	91164439	wt_k27_peak_6005	511	WT	WT Specific
chr13	91167003	91167878	chr13	91167003	91167878	wt_k27_peak_6006	875	WT	WT Specific
chr13	92134559	92134944	chr13	92134559	92134944	wt_k27_peak_6012	385	WT	WT Specific
chr13	92421974	92422446	chr13	92421974	92422446	wt_k27_peak_6013	472	WT	WT Specific
chr13	92438394	92438651	chr13	92438394	92438651	wt_k27_peak_6016	257	WT	WT Specific
chr13	93857301	93857648	chr13	93857301	93857648	wt_k27_peak_6028	347	WT	WT Specific
chr13	94290161	94290556	chr13	94290161	94290556	wt_k27_peak_6034	395	WT	WT Specific
chr13	94542341	94542707	chr13	94542341	94542707	wt_k27_peak_6036	366	WT	WT Specific
chr13	94585197	94585454	chr13	94585197	94585454	wt_k27_peak_6041	257	WT	WT Specific
chr13	94685630	94686154	chr13	94685630	94686154	wt_k27_peak_6048	524	WT	WT Specific
chr13	94910480	94910853	chr13	94910480	94910853	wt_k27_peak_6054	373	WT	WT Specific
chr13	95264798	95265141	chr13	95264798	95265141	wt_k27_peak_6057	343	WT	WT Specific
chr13	95461602	95462092	chr13	95461602	95462092	wt_k27_peak_6064	490	WT	WT Specific
chr13	95909277	95909690	chr13	95909277	95909690	wt_k27_peak_6081	413	WT	WT Specific
chr13	95990747	95991079	chr13	95990747	95991079	wt_k27_peak_6085	332	WT	WT Specific
chr13	96138810	96139099	chr13	96138810	96139099	wt_k27_peak_6089	289	WT	WT Specific
chr13	96381495	96381829	chr13	96381495	96381829	wt_k27_peak_6091	334	WT	WT Specific
chr13	97006441	97006891	chr13	97006441	97006891	wt_k27_peak_6102	450	WT	WT Specific
chr13	97217442	97218046	chr13	97217442	97218046	wt_k27_peak_6105	604	WT	WT Specific
chr13	97421141	97421553	chr13	97421141	97421553	wt_k27_peak_6108	412	WT	WT Specific
chr13	98014182	98014471	chr13	98014182	98014471	wt_k27_peak_6118	289	WT	WT Specific
chr13	98569407	98570346	chr13	98569407	98570346	wt_k27_peak_6130	939	WT	WT Specific
chr13	98578423	98578879	chr13	98578423	98578879	wt_k27_peak_6132	456	WT	WT Specific
chr13	98592211	98592530	chr13	98592211	98592530	wt_k27_peak_6135	319	WT	WT Specific
chr13	98698061	98698318	chr13	98698061	98698318	wt_k27_peak_6139	257	WT	WT Specific
chr13	100611466	100612538	chr13	100611466	100612538	wt_k27_peak_6147	1072	WT	WT Specific
chr13	101775880	101776219	chr13	101775880	101776219	wt_k27_peak_6157	339	WT	WT Specific
chr13	102645815	102646130	chr13	102645815	102646130	wt_k27_peak_6163	315	WT	WT Specific
chr13	103986004	103986335	chr13	103986004	103986335	wt_k27_peak_6170	331	WT	WT Specific
chr13	104013493	104013774	chr13	104013493	104013774	wt_k27_peak_6171	281	WT	WT Specific
chr13	105441408	105441814	chr13	105441408	105441814	wt_k27_peak_6177	406	WT	WT Specific
chr13	107461555	107462022	chr13	107461555	107462022	wt_k27_peak_6179	467	WT	WT Specific
chr13	107937859	107938116	chr13	107937859	107938116	wt_k27_peak_6190	257	WT	WT Specific
chr13	108315075	108315375	chr13	108315075	108315375	wt_k27_peak_6193	300	WT	WT Specific
chr13	108883194	108883596	chr13	108883194	108883596	wt_k27_peak_6194	402	WT	WT Specific
chr13	109079745	109080356	chr13	109079745	109080356	wt_k27_peak_6201	611	WT	WT Specific
chr13	109205269	109205695	chr13	109205269	109205695	wt_k27_peak_6205	426	WT	WT Specific
chr13	110002073	110002399	chr13	110002073	110002399	wt_k27_peak_6211	326	WT	WT Specific
chr13	112418274	112419539	chr13	112418274	112419539	wt_k27_peak_6229	1265	WT	WT Specific
chr13	112980473	112980920	chr13	112980473	112980920	wt_k27_peak_6234	447	WT	WT Specific
chr13	112981276	112981540	chr13	112981276	112981540	wt_k27_peak_6235	264	WT	WT Specific
chr13	112981994	112982467	chr13	112981994	112982467	wt_k27_peak_6236	473	WT	WT Specific
chr13	113211878	113212440	chr13	113211878	113212440	wt_k27_peak_6245	562	WT	WT Specific
chr13	113222359	113222661	chr13	113222359	113222661	wt_k27_peak_6246	302	WT	WT Specific
chr13	113223038	113223295	chr13	113223038	113223295	wt_k27_peak_6247	257	WT	WT Specific
chr13	114390864	114391203	chr13	114390864	114391203	wt_k27_peak_6254	339	WT	WT Specific
chr13	114392509	114393008	chr13	114392509	114393008	wt_k27_peak_6255	499	WT	WT Specific
chr13	114410390	114410738	chr13	114410390	114410738	wt_k27_peak_6256	348	WT	WT Specific
chr13	115102844	115103141	chr13	115102844	115103141	wt_k27_peak_6264	297	WT	WT Specific
chr13	116715431	116716034	chr13	116715431	116716034	wt_k27_peak_6268	603	WT	WT Specific
chr14	3032264	3032632	chr14	3032264	3032632	wt_k27_peak_6283	368	WT	WT Specific
chr14	3208716	3209061	chr14	3208716	3209061	wt_k27_peak_6284	345	WT	WT Specific
chr14	4726151	4726408	chr14	4726151	4726408	wt_k27_peak_6290	257	WT	WT Specific
chr14	5907015	5907292	chr14	5907015	5907292	wt_k27_peak_6293	277	WT	WT Specific
chr14	8313644	8313960	chr14	8313644	8313960	wt_k27_peak_6304	316	WT	WT Specific
chr14	8319767	8320244	chr14	8319767	8320244	wt_k27_peak_6307	477	WT	WT Specific
chr14	8329532	8330017	chr14	8329532	8330017	wt_k27_peak_6308	485	WT	WT Specific
chr14	8344287	8344580	chr14	8344287	8344580	wt_k27_peak_6309	293	WT	WT Specific
chr14	8736693	8736974	chr14	8736693	8736974	wt_k27_peak_6311	281	WT	WT Specific
chr14	11672343	11672607	chr14	11672343	11672607	wt_k27_peak_6315	264	WT	WT Specific
chr14	12334261	12334563	chr14	12334261	12334563	wt_k27_peak_6316	302	WT	WT Specific
chr14	13355476	13355748	chr14	13355476	13355748	wt_k27_peak_6323	272	WT	WT Specific
chr14	16250196	16250501	chr14	16250196	16250501	wt_k27_peak_6329	305	WT	WT Specific
chr14	18894716	18895446	chr14	18894716	18895446	wt_k27_peak_6338	730	WT	WT Specific
chr14	19716597	19716952	chr14	19716597	19716952	wt_k27_peak_6341	355	WT	WT Specific
chr14	19717659	19718079	chr14	19717659	19718079	wt_k27_peak_6342	420	WT	WT Specific
chr14	20094067	20094393	chr14	20094067	20094393	wt_k27_peak_6346	326	WT	WT Specific
chr14	20261614	20262168	chr14	20261614	20262168	wt_k27_peak_6351	554	WT	WT Specific
chr14	20798103	20798537	chr14	20798103	20798537	wt_k27_peak_6355	434	WT	WT Specific
chr14	20834157	20834418	chr14	20834157	20834418	wt_k27_peak_6356	261	WT	WT Specific
chr14	20846696	20846994	chr14	20846696	20846994	wt_k27_peak_6359	298	WT	WT Specific
chr14	20906567	20906943	chr14	20906567	20906943	wt_k27_peak_6361	376	WT	WT Specific
chr14	21965441	21966079	chr14	21965441	21966079	wt_k27_peak_6366	638	WT	WT Specific
chr14	21972064	21972371	chr14	21972064	21972371	wt_k27_peak_6367	307	WT	WT Specific
chr14	22051122	22051380	chr14	22051122	22051380	wt_k27_peak_6376	258	WT	WT Specific
chr14	23559421	23559703	chr14	23559421	23559703	wt_k27_peak_6381	282	WT	WT Specific
chr14	24243587	24243876	chr14	24243587	24243876	wt_k27_peak_6384	289	WT	WT Specific
chr14	25276458	25276749	chr14	25276458	25276749	wt_k27_peak_6388	291	WT	WT Specific
chr14	25316989	25317747	chr14	25316989	25317747	wt_k27_peak_6390	758	WT	WT Specific
chr14	25380658	25381519	chr14	25380658	25381519	wt_k27_peak_6393	861	WT	WT Specific
chr14	25452201	25452510	chr14	25452201	25452510	wt_k27_peak_6397	309	WT	WT Specific
chr14	27337423	27337680	chr14	27337423	27337680	wt_k27_peak_6420	257	WT	WT Specific
chr14	29707005	29707262	chr14	29707005	29707262	wt_k27_peak_6425	257	WT	WT Specific
chr14	29716230	29716751	chr14	29716230	29716751	wt_k27_peak_6426	521	WT	WT Specific
chr14	29937108	29937372	chr14	29937108	29937372	wt_k27_peak_6429	264	WT	WT Specific
chr14	31218957	31220056	chr14	31218957	31220056	wt_k27_peak_6437	1099	WT	WT Specific
chr14	32030111	32030368	chr14	32030111	32030368	wt_k27_peak_6443	257	WT	WT Specific
chr14	32406577	32406881	chr14	32406577	32406881	wt_k27_peak_6452	304	WT	WT Specific
chr14	32837546	32837895	chr14	32837546	32837895	wt_k27_peak_6465	349	WT	WT Specific
chr14	33249782	33250148	chr14	33249782	33250148	wt_k27_peak_6469	366	WT	WT Specific
chr14	33305418	33305681	chr14	33305418	33305681	wt_k27_peak_6471	263	WT	WT Specific
chr14	33928969	33929693	chr14	33928969	33929693	wt_k27_peak_6477	724	WT	WT Specific
chr14	33992422	33992839	chr14	33992422	33992839	wt_k27_peak_6480	417	WT	WT Specific
chr14	34609310	34609769	chr14	34609310	34609769	wt_k27_peak_6487	459	WT	WT Specific
chr14	34884586	34884959	chr14	34884586	34884959	wt_k27_peak_6496	373	WT	WT Specific
chr14	34936479	34936793	chr14	34936479	34936793	wt_k27_peak_6501	314	WT	WT Specific
chr14	37056317	37056712	chr14	37056317	37056712	wt_k27_peak_6503	395	WT	WT Specific
chr14	37101187	37101448	chr14	37101187	37101448	wt_k27_peak_6506	261	WT	WT Specific
chr14	41004069	41004359	chr14	41004069	41004359	wt_k27_peak_6509	290	WT	WT Specific
chr14	43359261	43359532	chr14	43359261	43359532	wt_k27_peak_6514	271	WT	WT Specific
chr14	43531366	43531638	chr14	43531366	43531638	wt_k27_peak_6516	272	WT	WT Specific
chr14	43532440	43532791	chr14	43532440	43532791	wt_k27_peak_6517	351	WT	WT Specific
chr14	44852034	44852291	chr14	44852034	44852291	wt_k27_peak_6518	257	WT	WT Specific
chr14	45321377	45321635	chr14	45321377	45321635	wt_k27_peak_6524	258	WT	WT Specific
chr14	45754909	45755316	chr14	45754909	45755316	wt_k27_peak_6528	407	WT	WT Specific
chr14	45774852	45775154	chr14	45774852	45775154	wt_k27_peak_6531	302	WT	WT Specific
chr14	46414557	46415018	chr14	46414557	46415018	wt_k27_peak_6539	461	WT	WT Specific
chr14	46755406	46756117	chr14	46755406	46756117	wt_k27_peak_6543	711	WT	WT Specific
chr14	46825127	46825456	chr14	46825127	46825456	wt_k27_peak_6546	329	WT	WT Specific
chr14	47016791	47017631	chr14	47016791	47017631	wt_k27_peak_6551	840	WT	WT Specific
chr14	47087810	47088580	chr14	47087810	47088580	wt_k27_peak_6552	770	WT	WT Specific
chr14	48471982	48472657	chr14	48471982	48472657	wt_k27_peak_6561	675	WT	WT Specific
chr14	48629910	48630382	chr14	48629910	48630382	wt_k27_peak_6570	472	WT	WT Specific
chr14	48654175	48654432	chr14	48654175	48654432	wt_k27_peak_6572	257	WT	WT Specific
chr14	48678350	48678902	chr14	48678350	48678902	wt_k27_peak_6577	552	WT	WT Specific
chr14	48708854	48709154	chr14	48708854	48709154	wt_k27_peak_6579	300	WT	WT Specific
chr14	49786349	49787008	chr14	49786349	49787008	wt_k27_peak_6596	659	WT	WT Specific
chr14	50060769	50061248	chr14	50060769	50061248	wt_k27_peak_6597	479	WT	WT Specific
chr14	51911537	51911984	chr14	51911537	51911984	wt_k27_peak_6609	447	WT	WT Specific
chr14	51944235	51944653	chr14	51944235	51944653	wt_k27_peak_6612	418	WT	WT Specific
chr14	51993022	51993544	chr14	51993022	51993544	wt_k27_peak_6614	522	WT	WT Specific
chr14	52041985	52042454	chr14	52041985	52042454	wt_k27_peak_6619	469	WT	WT Specific
chr14	52321893	52322223	chr14	52321893	52322223	wt_k27_peak_6623	330	WT	WT Specific
chr14	54304799	54305149	chr14	54304799	54305149	wt_k27_peak_6629	350	WT	WT Specific
chr14	54307995	54308864	chr14	54307995	54308864	wt_k27_peak_6630	869	WT	WT Specific
chr14	54334609	54334970	chr14	54334609	54334970	wt_k27_peak_6631	361	WT	WT Specific
chr14	54556420	54557106	chr14	54556420	54557106	wt_k27_peak_6636	686	WT	WT Specific
chr14	54627897	54628339	chr14	54627897	54628339	wt_k27_peak_6639	442	WT	WT Specific
chr14	54789583	54789901	chr14	54789583	54789901	wt_k27_peak_6647	318	WT	WT Specific
chr14	54811554	54811899	chr14	54811554	54811899	wt_k27_peak_6648	345	WT	WT Specific
chr14	54908889	54909882	chr14	54908889	54909882	wt_k27_peak_6652	993	WT	WT Specific
chr14	54934702	54935002	chr14	54934702	54935002	wt_k27_peak_6655	300	WT	WT Specific
chr14	54966349	54966723	chr14	54966349	54966723	wt_k27_peak_6659	374	WT	WT Specific
chr14	54996242	54996687	chr14	54996242	54996687	wt_k27_peak_6663	445	WT	WT Specific
chr14	55468067	55468521	chr14	55468067	55468521	wt_k27_peak_6669	454	WT	WT Specific
chr14	55512547	55512804	chr14	55512547	55512804	wt_k27_peak_6675	257	WT	WT Specific
chr14	55517783	55518336	chr14	55517783	55518336	wt_k27_peak_6676	553	WT	WT Specific
chr14	55524390	55525134	chr14	55524390	55525134	wt_k27_peak_6679	744	WT	WT Specific
chr14	55877541	55878179	chr14	55877541	55878179	wt_k27_peak_6696	638	WT	WT Specific
chr14	55899478	55900162	chr14	55899478	55900162	wt_k27_peak_6697	684	WT	WT Specific
chr14	56060817	56061343	chr14	56060817	56061343	wt_k27_peak_6700	526	WT	WT Specific
chr14	56576394	56576767	chr14	56576394	56576767	wt_k27_peak_6705	373	WT	WT Specific
chr14	57110873	57111172	chr14	57110873	57111172	wt_k27_peak_6712	299	WT	WT Specific
chr14	58065440	58065836	chr14	58065440	58065836	wt_k27_peak_6732	396	WT	WT Specific
chr14	61010769	61011188	chr14	61010769	61011188	wt_k27_peak_6751	419	WT	WT Specific
chr14	61170032	61170475	chr14	61170032	61170475	wt_k27_peak_6758	443	WT	WT Specific
chr14	62456911	62457206	chr14	62456911	62457206	wt_k27_peak_6768	295	WT	WT Specific
chr14	63548777	63549246	chr14	63548777	63549246	wt_k27_peak_6781	469	WT	WT Specific
chr14	63603932	63604683	chr14	63603932	63604683	wt_k27_peak_6784	751	WT	WT Specific
chr14	63742568	63742985	chr14	63742568	63742985	wt_k27_peak_6785	417	WT	WT Specific
chr14	64029895	64030351	chr14	64029895	64030351	wt_k27_peak_6790	456	WT	WT Specific
chr14	65356596	65356873	chr14	65356596	65356873	wt_k27_peak_6796	277	WT	WT Specific
chr14	65404777	65405939	chr14	65404777	65405939	wt_k27_peak_6799	1162	WT	WT Specific
chr14	65779701	65780001	chr14	65779701	65780001	wt_k27_peak_6802	300	WT	WT Specific
chr14	66907488	66908054	chr14	66907488	66908054	wt_k27_peak_6813	566	WT	WT Specific
chr14	67226582	67226982	chr14	67226582	67226982	wt_k27_peak_6816	400	WT	WT Specific
chr14	67606777	67607111	chr14	67606777	67607111	wt_k27_peak_6818	334	WT	WT Specific
chr14	68130137	68130537	chr14	68130137	68130537	wt_k27_peak_6834	400	WT	WT Specific
chr14	69028626	69028979	chr14	69028626	69028979	wt_k27_peak_6836	353	WT	WT Specific
chr14	69136327	69136870	chr14	69136327	69136870	wt_k27_peak_6838	543	WT	WT Specific
chr14	69169032	69169470	chr14	69169032	69169470	wt_k27_peak_6839	438	WT	WT Specific
chr14	69806375	69806801	chr14	69806375	69806801	wt_k27_peak_6844	426	WT	WT Specific
chr14	69934491	69934974	chr14	69934491	69934974	wt_k27_peak_6853	483	WT	WT Specific
chr14	69937261	69937548	chr14	69937261	69937548	wt_k27_peak_6854	287	WT	WT Specific
chr14	70001035	70001737	chr14	70001035	70001737	wt_k27_peak_6856	702	WT	WT Specific
chr14	70050317	70050634	chr14	70050317	70050634	wt_k27_peak_6858	317	WT	WT Specific
chr14	70092129	70092837	chr14	70092129	70092837	wt_k27_peak_6863	708	WT	WT Specific
chr14	70093324	70093736	chr14	70093324	70093736	wt_k27_peak_6864	412	WT	WT Specific
chr14	70098909	70099478	chr14	70098909	70099478	wt_k27_peak_6866	569	WT	WT Specific
chr14	70219951	70220251	chr14	70219951	70220251	wt_k27_peak_6873	300	WT	WT Specific
chr14	70220594	70221156	chr14	70220594	70221156	wt_k27_peak_6874	562	WT	WT Specific
chr14	70460714	70461451	chr14	70460714	70461451	wt_k27_peak_6880	737	WT	WT Specific
chr14	70469685	70470128	chr14	70469685	70470128	wt_k27_peak_6883	443	WT	WT Specific
chr14	70524985	70525293	chr14	70524985	70525293	wt_k27_peak_6888	308	WT	WT Specific
chr14	70897671	70897928	chr14	70897671	70897928	wt_k27_peak_6907	257	WT	WT Specific
chr14	72157572	72157846	chr14	72157572	72157846	wt_k27_peak_6908	274	WT	WT Specific
chr14	72507842	72508229	chr14	72507842	72508229	wt_k27_peak_6910	387	WT	WT Specific
chr14	72870436	72870707	chr14	72870436	72870707	wt_k27_peak_6914	271	WT	WT Specific
chr14	72982224	72982701	chr14	72982224	72982701	wt_k27_peak_6915	477	WT	WT Specific
chr14	75036816	75037073	chr14	75036816	75037073	wt_k27_peak_6923	257	WT	WT Specific
chr14	75365141	75365476	chr14	75365141	75365476	wt_k27_peak_6927	335	WT	WT Specific
chr14	77772797	77773080	chr14	77772797	77773080	wt_k27_peak_6944	283	WT	WT Specific
chr14	78038903	78039334	chr14	78038903	78039334	wt_k27_peak_6945	431	WT	WT Specific
chr14	78309459	78310246	chr14	78309459	78310246	wt_k27_peak_6948	787	WT	WT Specific
chr14	79788107	79788434	chr14	79788107	79788434	wt_k27_peak_6969	327	WT	WT Specific
chr14	101615330	101615624	chr14	101615330	101615624	wt_k27_peak_6986	294	WT	WT Specific
chr14	103513311	103513658	chr14	103513311	103513658	wt_k27_peak_6992	347	WT	WT Specific
chr14	103718063	103718323	chr14	103718063	103718323	wt_k27_peak_6993	260	WT	WT Specific
chr14	105479976	105480259	chr14	105479976	105480259	wt_k27_peak_7005	283	WT	WT Specific
chr14	105503087	105503354	chr14	105503087	105503354	wt_k27_peak_7006	267	WT	WT Specific
chr14	105815964	105816248	chr14	105815964	105816248	wt_k27_peak_7007	284	WT	WT Specific
chr14	115022466	115022906	chr14	115022466	115022906	wt_k27_peak_7011	440	WT	WT Specific
chr14	115032123	115032488	chr14	115032123	115032488	wt_k27_peak_7012	365	WT	WT Specific
chr14	115089385	115089692	chr14	115089385	115089692	wt_k27_peak_7014	307	WT	WT Specific
chr14	118442129	118442537	chr14	118442129	118442537	wt_k27_peak_7028	408	WT	WT Specific
chr14	118706977	118707351	chr14	118706977	118707351	wt_k27_peak_7032	374	WT	WT Specific
chr14	120389447	120389754	chr14	120389447	120389754	wt_k27_peak_7043	307	WT	WT Specific
chr14	120475727	120476045	chr14	120475727	120476045	wt_k27_peak_7044	318	WT	WT Specific
chr14	122075410	122075697	chr14	122075410	122075697	wt_k27_peak_7050	287	WT	WT Specific
chr14	122411551	122412184	chr14	122411551	122412184	wt_k27_peak_7063	633	WT	WT Specific
chr14	122499853	122500254	chr14	122499853	122500254	wt_k27_peak_7069	401	WT	WT Specific
chr15	5099277	5099719	chr15	5099277	5099719	wt_k27_peak_7078	442	WT	WT Specific
chr15	6385962	6386270	chr15	6385962	6386270	wt_k27_peak_7081	308	WT	WT Specific
chr15	6571814	6572154	chr15	6571814	6572154	wt_k27_peak_7083	340	WT	WT Specific
chr15	6625054	6625701	chr15	6625054	6625701	wt_k27_peak_7084	647	WT	WT Specific
chr15	8567937	8568629	chr15	8567937	8568629	wt_k27_peak_7096	692	WT	WT Specific
chr15	8781353	8781875	chr15	8781353	8781875	wt_k27_peak_7103	522	WT	WT Specific
chr15	8782299	8782556	chr15	8782299	8782556	wt_k27_peak_7104	257	WT	WT Specific
chr15	11890813	11891207	chr15	11890813	11891207	wt_k27_peak_7109	394	WT	WT Specific
chr15	12018731	12019067	chr15	12018731	12019067	wt_k27_peak_7113	336	WT	WT Specific
chr15	13090026	13090520	chr15	13090026	13090520	wt_k27_peak_7121	494	WT	WT Specific
chr15	19715951	19716954	chr15	19715951	19716954	wt_k27_peak_7131	1003	WT	WT Specific
chr15	25413329	25413763	chr15	25413329	25413763	wt_k27_peak_7138	434	WT	WT Specific
chr15	25502509	25502771	chr15	25502509	25502771	wt_k27_peak_7145	262	WT	WT Specific
chr15	25521526	25521814	chr15	25521526	25521814	wt_k27_peak_7146	288	WT	WT Specific
chr15	25614392	25615118	chr15	25614392	25615118	wt_k27_peak_7147	726	WT	WT Specific
chr15	25678757	25679173	chr15	25678757	25679173	wt_k27_peak_7150	416	WT	WT Specific
chr15	34429923	34430337	chr15	34429923	34430337	wt_k27_peak_7217	414	WT	WT Specific
chr15	34450149	34450406	chr15	34450149	34450406	wt_k27_peak_7218	257	WT	WT Specific
chr15	35287367	35287642	chr15	35287367	35287642	wt_k27_peak_7225	275	WT	WT Specific
chr15	35324201	35324734	chr15	35324201	35324734	wt_k27_peak_7229	533	WT	WT Specific
chr15	37278959	37279581	chr15	37278959	37279581	wt_k27_peak_7251	622	WT	WT Specific
chr15	37280220	37280961	chr15	37280220	37280961	wt_k27_peak_7252	741	WT	WT Specific
chr15	38304589	38305043	chr15	38304589	38305043	wt_k27_peak_7255	454	WT	WT Specific
chr15	38888130	38888567	chr15	38888130	38888567	wt_k27_peak_7259	437	WT	WT Specific
chr15	39942068	39942381	chr15	39942068	39942381	wt_k27_peak_7269	313	WT	WT Specific
chr15	41442358	41442677	chr15	41442358	41442677	wt_k27_peak_7273	319	WT	WT Specific
chr15	43167658	43168026	chr15	43167658	43168026	wt_k27_peak_7278	368	WT	WT Specific
chr15	44784650	44785483	chr15	44784650	44785483	wt_k27_peak_7286	833	WT	WT Specific
chr15	44825473	44825933	chr15	44825473	44825933	wt_k27_peak_7288	460	WT	WT Specific
chr15	45861720	45862233	chr15	45861720	45862233	wt_k27_peak_7291	513	WT	WT Specific
chr15	48785459	48785850	chr15	48785459	48785850	wt_k27_peak_7292	391	WT	WT Specific
chr15	51875440	51875707	chr15	51875440	51875707	wt_k27_peak_7297	267	WT	WT Specific
chr15	53367212	53367875	chr15	53367212	53367875	wt_k27_peak_7302	663	WT	WT Specific
chr15	54574219	54574697	chr15	54574219	54574697	wt_k27_peak_7305	478	WT	WT Specific
chr15	54949747	54950097	chr15	54949747	54950097	wt_k27_peak_7309	350	WT	WT Specific
chr15	57601264	57601521	chr15	57601264	57601521	wt_k27_peak_7315	257	WT	WT Specific
chr15	58733784	58734068	chr15	58733784	58734068	wt_k27_peak_7323	284	WT	WT Specific
chr15	60833783	60834340	chr15	60833783	60834340	wt_k27_peak_7330	557	WT	WT Specific
chr15	61922951	61923239	chr15	61922951	61923239	wt_k27_peak_7332	288	WT	WT Specific
chr15	64311302	64311758	chr15	64311302	64311758	wt_k27_peak_7341	456	WT	WT Specific
chr15	64916855	64917265	chr15	64916855	64917265	wt_k27_peak_7344	410	WT	WT Specific
chr15	64929305	64929562	chr15	64929305	64929562	wt_k27_peak_7346	257	WT	WT Specific
chr15	65744594	65744989	chr15	65744594	65744989	wt_k27_peak_7347	395	WT	WT Specific
chr15	65753979	65754937	chr15	65753979	65754937	wt_k27_peak_7350	958	WT	WT Specific
chr15	65784443	65784960	chr15	65784443	65784960	wt_k27_peak_7351	517	WT	WT Specific
chr15	67172520	67173307	chr15	67172520	67173307	wt_k27_peak_7361	787	WT	WT Specific
chr15	68362009	68362302	chr15	68362009	68362302	wt_k27_peak_7365	293	WT	WT Specific
chr15	68429997	68430254	chr15	68429997	68430254	wt_k27_peak_7368	257	WT	WT Specific
chr15	71724238	71724553	chr15	71724238	71724553	wt_k27_peak_7372	315	WT	WT Specific
chr15	74523013	74523437	chr15	74523013	74523437	wt_k27_peak_7390	424	WT	WT Specific
chr15	74601929	74602589	chr15	74601929	74602589	wt_k27_peak_7395	660	WT	WT Specific
chr15	75598039	75598366	chr15	75598039	75598366	wt_k27_peak_7404	327	WT	WT Specific
chr15	75738308	75738683	chr15	75738308	75738683	wt_k27_peak_7414	375	WT	WT Specific
chr15	76226834	76227205	chr15	76226834	76227205	wt_k27_peak_7439	371	WT	WT Specific
chr15	76527353	76527728	chr15	76527353	76527728	wt_k27_peak_7448	375	WT	WT Specific
chr15	77997916	77998360	chr15	77997916	77998360	wt_k27_peak_7459	444	WT	WT Specific
chr15	78115203	78115729	chr15	78115203	78115729	wt_k27_peak_7460	526	WT	WT Specific
chr15	79107245	79107535	chr15	79107245	79107535	wt_k27_peak_7491	290	WT	WT Specific
chr15	79204455	79204860	chr15	79204455	79204860	wt_k27_peak_7499	405	WT	WT Specific
chr15	79255292	79255795	chr15	79255292	79255795	wt_k27_peak_7501	503	WT	WT Specific
chr15	80017624	80018408	chr15	80017624	80018408	wt_k27_peak_7535	784	WT	WT Specific
chr15	80172570	80173304	chr15	80172570	80173304	wt_k27_peak_7539	734	WT	WT Specific
chr15	80205799	80206195	chr15	80205799	80206195	wt_k27_peak_7542	396	WT	WT Specific
chr15	80372109	80372415	chr15	80372109	80372415	wt_k27_peak_7548	306	WT	WT Specific
chr15	80978657	80978959	chr15	80978657	80978959	wt_k27_peak_7558	302	WT	WT Specific
chr15	81216745	81217206	chr15	81216745	81217206	wt_k27_peak_7559	461	WT	WT Specific
chr15	82225963	82226352	chr15	82225963	82226352	wt_k27_peak_7576	389	WT	WT Specific
chr15	82296999	82297732	chr15	82296999	82297732	wt_k27_peak_7579	733	WT	WT Specific
chr15	82907356	82907907	chr15	82907356	82907907	wt_k27_peak_7584	551	WT	WT Specific
chr15	82996306	82996586	chr15	82996306	82996586	wt_k27_peak_7601	280	WT	WT Specific
chr15	82997483	82997762	chr15	82997483	82997762	wt_k27_peak_7602	279	WT	WT Specific
chr15	84626332	84626772	chr15	84626332	84626772	wt_k27_peak_7659	440	WT	WT Specific
chr15	85314798	85315311	chr15	85314798	85315311	wt_k27_peak_7680	513	WT	WT Specific
chr15	85496849	85497283	chr15	85496849	85497283	wt_k27_peak_7685	434	WT	WT Specific
chr15	85627870	85628137	chr15	85627870	85628137	wt_k27_peak_7693	267	WT	WT Specific
chr15	85658446	85658807	chr15	85658446	85658807	wt_k27_peak_7696	361	WT	WT Specific
chr15	87549325	87549633	chr15	87549325	87549633	wt_k27_peak_7713	308	WT	WT Specific
chr15	88187322	88187579	chr15	88187322	88187579	wt_k27_peak_7716	257	WT	WT Specific
chr15	88732383	88732676	chr15	88732383	88732676	wt_k27_peak_7720	293	WT	WT Specific
chr15	88959245	88959561	chr15	88959245	88959561	wt_k27_peak_7724	316	WT	WT Specific
chr15	89573748	89574005	chr15	89573748	89574005	wt_k27_peak_7759	257	WT	WT Specific
chr15	89769976	89770235	chr15	89769976	89770235	wt_k27_peak_7762	259	WT	WT Specific
chr15	91284030	91284329	chr15	91284030	91284329	wt_k27_peak_7767	299	WT	WT Specific
chr15	91675188	91675494	chr15	91675188	91675494	wt_k27_peak_7770	306	WT	WT Specific
chr15	93341607	93341945	chr15	93341607	93341945	wt_k27_peak_7778	338	WT	WT Specific
chr15	93600075	93600474	chr15	93600075	93600474	wt_k27_peak_7793	399	WT	WT Specific
chr15	93610485	93611100	chr15	93610485	93611100	wt_k27_peak_7794	615	WT	WT Specific
chr15	94549209	94549466	chr15	94549209	94549466	wt_k27_peak_7801	257	WT	WT Specific
chr15	94594282	94594636	chr15	94594282	94594636	wt_k27_peak_7802	354	WT	WT Specific
chr15	95649361	95649779	chr15	95649361	95649779	wt_k27_peak_7811	418	WT	WT Specific
chr15	97247732	97248071	chr15	97247732	97248071	wt_k27_peak_7830	339	WT	WT Specific
chr15	97248597	97249067	chr15	97248597	97249067	wt_k27_peak_7831	470	WT	WT Specific
chr15	97781658	97781966	chr15	97781658	97781966	wt_k27_peak_7837	308	WT	WT Specific
chr15	97951917	97952195	chr15	97951917	97952195	wt_k27_peak_7852	278	WT	WT Specific
chr15	97995677	97996114	chr15	97995677	97996114	wt_k27_peak_7855	437	WT	WT Specific
chr15	98164717	98165066	chr15	98164717	98165066	wt_k27_peak_7862	349	WT	WT Specific
chr15	98177513	98178123	chr15	98177513	98178123	wt_k27_peak_7866	610	WT	WT Specific
chr15	98180220	98180753	chr15	98180220	98180753	wt_k27_peak_7868	533	WT	WT Specific
chr15	98499555	98499951	chr15	98499555	98499951	wt_k27_peak_7871	396	WT	WT Specific
chr15	98577879	98578143	chr15	98577879	98578143	wt_k27_peak_7872	264	WT	WT Specific
chr15	98592489	98593055	chr15	98592489	98593055	wt_k27_peak_7873	566	WT	WT Specific
chr15	98677953	98678589	chr15	98677953	98678589	wt_k27_peak_7885	636	WT	WT Specific
chr15	98706788	98707045	chr15	98706788	98707045	wt_k27_peak_7890	257	WT	WT Specific
chr15	99066411	99066679	chr15	99066411	99066679	wt_k27_peak_7905	268	WT	WT Specific
chr15	99284613	99284944	chr15	99284613	99284944	wt_k27_peak_7914	331	WT	WT Specific
chr15	99382014	99382469	chr15	99382014	99382469	wt_k27_peak_7918	455	WT	WT Specific
chr15	99663214	99663491	chr15	99663214	99663491	wt_k27_peak_7927	277	WT	WT Specific
chr15	99696943	99697293	chr15	99696943	99697293	wt_k27_peak_7930	350	WT	WT Specific
chr15	100335409	100335690	chr15	100335409	100335690	wt_k27_peak_7934	281	WT	WT Specific
chr15	100475123	100475462	chr15	100475123	100475462	wt_k27_peak_7938	339	WT	WT Specific
chr15	100638006	100638419	chr15	100638006	100638419	wt_k27_peak_7947	413	WT	WT Specific
chr15	100684769	100685026	chr15	100684769	100685026	wt_k27_peak_7951	257	WT	WT Specific
chr15	100686154	100686607	chr15	100686154	100686607	wt_k27_peak_7952	453	WT	WT Specific
chr15	100861629	100861887	chr15	100861629	100861887	wt_k27_peak_7967	258	WT	WT Specific
chr15	101025039	101025893	chr15	101025039	101025893	wt_k27_peak_7977	854	WT	WT Specific
chr15	101029264	101029534	chr15	101029264	101029534	wt_k27_peak_7978	270	WT	WT Specific
chr15	101167627	101168552	chr15	101167627	101168552	wt_k27_peak_7994	925	WT	WT Specific
chr15	102065229	102065552	chr15	102065229	102065552	wt_k27_peak_8031	323	WT	WT Specific
chr15	102139330	102139744	chr15	102139330	102139744	wt_k27_peak_8038	414	WT	WT Specific
chr15	102636391	102636667	chr15	102636391	102636667	wt_k27_peak_8054	276	WT	WT Specific
chr15	102682334	102682600	chr15	102682334	102682600	wt_k27_peak_8055	266	WT	WT Specific
chr15	102770897	102771289	chr15	102770897	102771289	wt_k27_peak_8071	392	WT	WT Specific
chr15	102894897	102895211	chr15	102894897	102895211	wt_k27_peak_8073	314	WT	WT Specific
chr15	102902243	102902860	chr15	102902243	102902860	wt_k27_peak_8074	617	WT	WT Specific
chr15	103048684	103049273	chr15	103048684	103049273	wt_k27_peak_8083	589	WT	WT Specific
chr15	103053121	103053727	chr15	103053121	103053727	wt_k27_peak_8084	606	WT	WT Specific
chr15	103148955	103149464	chr15	103148955	103149464	wt_k27_peak_8109	509	WT	WT Specific
chr15	103340530	103341514	chr15	103340530	103341514	wt_k27_peak_8119	984	WT	WT Specific
chr16	3016636	3016917	chr16	3016636	3016917	wt_k27_peak_8123	281	WT	WT Specific
chr16	5536334	5536624	chr16	5536334	5536624	wt_k27_peak_8137	290	WT	WT Specific
chr16	5880939	5881287	chr16	5880939	5881287	wt_k27_peak_8138	348	WT	WT Specific
chr16	6793675	6794292	chr16	6793675	6794292	wt_k27_peak_8142	617	WT	WT Specific
chr16	6971571	6971899	chr16	6971571	6971899	wt_k27_peak_8148	328	WT	WT Specific
chr16	6975572	6976253	chr16	6975572	6976253	wt_k27_peak_8150	681	WT	WT Specific
chr16	8308109	8308565	chr16	8308109	8308565	wt_k27_peak_8153	456	WT	WT Specific
chr16	8386670	8387015	chr16	8386670	8387015	wt_k27_peak_8154	345	WT	WT Specific
chr16	8422207	8422505	chr16	8422207	8422505	wt_k27_peak_8156	298	WT	WT Specific
chr16	10279066	10279479	chr16	10279066	10279479	wt_k27_peak_8165	413	WT	WT Specific
chr16	10329720	10330044	chr16	10329720	10330044	wt_k27_peak_8169	324	WT	WT Specific
chr16	10501262	10501688	chr16	10501262	10501688	wt_k27_peak_8174	426	WT	WT Specific
chr16	10791516	10791775	chr16	10791516	10791775	wt_k27_peak_8177	259	WT	WT Specific
chr16	11178036	11178378	chr16	11178036	11178378	wt_k27_peak_8183	342	WT	WT Specific
chr16	12260465	12260798	chr16	12260465	12260798	wt_k27_peak_8186	333	WT	WT Specific
chr16	13027483	13027895	chr16	13027483	13027895	wt_k27_peak_8187	412	WT	WT Specific
chr16	13455454	13455910	chr16	13455454	13455910	wt_k27_peak_8190	456	WT	WT Specific
chr16	14700243	14700500	chr16	14700243	14700500	wt_k27_peak_8193	257	WT	WT Specific
chr16	14702414	14702800	chr16	14702414	14702800	wt_k27_peak_8194	386	WT	WT Specific
chr16	14906633	14907153	chr16	14906633	14907153	wt_k27_peak_8197	520	WT	WT Specific
chr16	15086524	15086781	chr16	15086524	15086781	wt_k27_peak_8199	257	WT	WT Specific
chr16	15601857	15602365	chr16	15601857	15602365	wt_k27_peak_8200	508	WT	WT Specific
chr16	15602758	15603759	chr16	15602758	15603759	wt_k27_peak_8201	1001	WT	WT Specific
chr16	15873139	15873489	chr16	15873139	15873489	wt_k27_peak_8202	350	WT	WT Specific
chr16	16199018	16199276	chr16	16199018	16199276	wt_k27_peak_8208	258	WT	WT Specific
chr16	17135954	17136475	chr16	17135954	17136475	wt_k27_peak_8214	521	WT	WT Specific
chr16	17138051	17138494	chr16	17138051	17138494	wt_k27_peak_8215	443	WT	WT Specific
chr16	17206489	17206832	chr16	17206489	17206832	wt_k27_peak_8216	343	WT	WT Specific
chr16	17211087	17211486	chr16	17211087	17211486	wt_k27_peak_8219	399	WT	WT Specific
chr16	17228719	17229579	chr16	17228719	17229579	wt_k27_peak_8220	860	WT	WT Specific
chr16	17556895	17557328	chr16	17556895	17557328	wt_k27_peak_8225	433	WT	WT Specific
chr16	17819400	17819784	chr16	17819400	17819784	wt_k27_peak_8232	384	WT	WT Specific
chr16	17822182	17822522	chr16	17822182	17822522	wt_k27_peak_8233	340	WT	WT Specific
chr16	18576488	18576978	chr16	18576488	18576978	wt_k27_peak_8239	490	WT	WT Specific
chr16	20698073	20698527	chr16	20698073	20698527	wt_k27_peak_8253	454	WT	WT Specific
chr16	21202394	21202651	chr16	21202394	21202651	wt_k27_peak_8255	257	WT	WT Specific
chr16	21233348	21233661	chr16	21233348	21233661	wt_k27_peak_8257	313	WT	WT Specific
chr16	21242011	21242281	chr16	21242011	21242281	wt_k27_peak_8258	270	WT	WT Specific
chr16	21307720	21308155	chr16	21307720	21308155	wt_k27_peak_8262	435	WT	WT Specific
chr16	21334012	21334451	chr16	21334012	21334451	wt_k27_peak_8264	439	WT	WT Specific
chr16	22808044	22808425	chr16	22808044	22808425	wt_k27_peak_8287	381	WT	WT Specific
chr16	22808824	22809597	chr16	22808824	22809597	wt_k27_peak_8288	773	WT	WT Specific
chr16	22890352	22890774	chr16	22890352	22890774	wt_k27_peak_8289	422	WT	WT Specific
chr16	23550885	23551489	chr16	23550885	23551489	wt_k27_peak_8298	604	WT	WT Specific
chr16	25411572	25411932	chr16	25411572	25411932	wt_k27_peak_8307	360	WT	WT Specific
chr16	26102982	26103563	chr16	26102982	26103563	wt_k27_peak_8309	581	WT	WT Specific
chr16	26956607	26956984	chr16	26956607	26956984	wt_k27_peak_8315	377	WT	WT Specific
chr16	27387043	27387331	chr16	27387043	27387331	wt_k27_peak_8320	288	WT	WT Specific
chr16	29196890	29197666	chr16	29196890	29197666	wt_k27_peak_8331	776	WT	WT Specific
chr16	29541409	29541739	chr16	29541409	29541739	wt_k27_peak_8333	330	WT	WT Specific
chr16	29556797	29557078	chr16	29556797	29557078	wt_k27_peak_8334	281	WT	WT Specific
chr16	29886653	29887006	chr16	29886653	29887006	wt_k27_peak_8349	353	WT	WT Specific
chr16	29918183	29918532	chr16	29918183	29918532	wt_k27_peak_8354	349	WT	WT Specific
chr16	30142120	30142501	chr16	30142120	30142501	wt_k27_peak_8370	381	WT	WT Specific
chr16	30144835	30145102	chr16	30144835	30145102	wt_k27_peak_8372	267	WT	WT Specific
chr16	30305021	30305401	chr16	30305021	30305401	wt_k27_peak_8383	380	WT	WT Specific
chr16	30651604	30652215	chr16	30651604	30652215	wt_k27_peak_8390	611	WT	WT Specific
chr16	31349590	31349978	chr16	31349590	31349978	wt_k27_peak_8396	388	WT	WT Specific
chr16	31521176	31521433	chr16	31521176	31521433	wt_k27_peak_8400	257	WT	WT Specific
chr16	31648200	31648499	chr16	31648200	31648499	wt_k27_peak_8402	299	WT	WT Specific
chr16	31925624	31925896	chr16	31925624	31925896	wt_k27_peak_8413	272	WT	WT Specific
chr16	32165850	32166267	chr16	32165850	32166267	wt_k27_peak_8416	417	WT	WT Specific
chr16	32201629	32202093	chr16	32201629	32202093	wt_k27_peak_8417	464	WT	WT Specific
chr16	33324311	33324620	chr16	33324311	33324620	wt_k27_peak_8421	309	WT	WT Specific
chr16	33753318	33753669	chr16	33753318	33753669	wt_k27_peak_8424	351	WT	WT Specific
chr16	34091244	34091741	chr16	34091244	34091741	wt_k27_peak_8428	497	WT	WT Specific
chr16	34355646	34356085	chr16	34355646	34356085	wt_k27_peak_8432	439	WT	WT Specific
chr16	34358534	34359044	chr16	34358534	34359044	wt_k27_peak_8433	510	WT	WT Specific
chr16	34564393	34564853	chr16	34564393	34564853	wt_k27_peak_8434	460	WT	WT Specific
chr16	34650699	34651108	chr16	34650699	34651108	wt_k27_peak_8437	409	WT	WT Specific
chr16	35009439	35009704	chr16	35009439	35009704	wt_k27_peak_8442	265	WT	WT Specific
chr16	35126645	35126902	chr16	35126645	35126902	wt_k27_peak_8443	257	WT	WT Specific
chr16	35544742	35545277	chr16	35544742	35545277	wt_k27_peak_8449	535	WT	WT Specific
chr16	35680167	35680663	chr16	35680167	35680663	wt_k27_peak_8454	496	WT	WT Specific
chr16	35871940	35872443	chr16	35871940	35872443	wt_k27_peak_8457	503	WT	WT Specific
chr16	35872948	35873274	chr16	35872948	35873274	wt_k27_peak_8458	326	WT	WT Specific
chr16	36479847	36480128	chr16	36479847	36480128	wt_k27_peak_8460	281	WT	WT Specific
chr16	37389436	37389952	chr16	37389436	37389952	wt_k27_peak_8470	516	WT	WT Specific
chr16	37400227	37400486	chr16	37400227	37400486	wt_k27_peak_8471	259	WT	WT Specific
chr16	37683215	37683989	chr16	37683215	37683989	wt_k27_peak_8473	774	WT	WT Specific
chr16	38324835	38325155	chr16	38324835	38325155	wt_k27_peak_8482	320	WT	WT Specific
chr16	38612895	38613191	chr16	38612895	38613191	wt_k27_peak_8489	296	WT	WT Specific
chr16	38619732	38620137	chr16	38619732	38620137	wt_k27_peak_8490	405	WT	WT Specific
chr16	42172043	42172310	chr16	42172043	42172310	wt_k27_peak_8510	267	WT	WT Specific
chr16	42173025	42173381	chr16	42173025	42173381	wt_k27_peak_8511	356	WT	WT Specific
chr16	42189102	42189781	chr16	42189102	42189781	wt_k27_peak_8512	679	WT	WT Specific
chr16	42191622	42191977	chr16	42191622	42191977	wt_k27_peak_8513	355	WT	WT Specific
chr16	43708161	43708463	chr16	43708161	43708463	wt_k27_peak_8518	302	WT	WT Specific
chr16	44062624	44063184	chr16	44062624	44063184	wt_k27_peak_8521	560	WT	WT Specific
chr16	44554477	44554942	chr16	44554477	44554942	wt_k27_peak_8529	465	WT	WT Specific
chr16	44695931	44696579	chr16	44695931	44696579	wt_k27_peak_8537	648	WT	WT Specific
chr16	49699606	49700310	chr16	49699606	49700310	wt_k27_peak_8549	704	WT	WT Specific
chr16	49806969	49807392	chr16	49806969	49807392	wt_k27_peak_8551	423	WT	WT Specific
chr16	50482698	50482971	chr16	50482698	50482971	wt_k27_peak_8558	273	WT	WT Specific
chr16	50485471	50485728	chr16	50485471	50485728	wt_k27_peak_8559	257	WT	WT Specific
chr16	50523536	50524229	chr16	50523536	50524229	wt_k27_peak_8560	693	WT	WT Specific
chr16	52455853	52456429	chr16	52455853	52456429	wt_k27_peak_8567	576	WT	WT Specific
chr16	55904964	55906204	chr16	55904964	55906204	wt_k27_peak_8576	1240	WT	WT Specific
chr16	56721540	56721843	chr16	56721540	56721843	wt_k27_peak_8579	303	WT	WT Specific
chr16	57615217	57615615	chr16	57615217	57615615	wt_k27_peak_8584	398	WT	WT Specific
chr16	59407003	59407509	chr16	59407003	59407509	wt_k27_peak_8589	506	WT	WT Specific
chr16	59604184	59604587	chr16	59604184	59604587	wt_k27_peak_8591	403	WT	WT Specific
chr16	59636695	59637172	chr16	59636695	59637172	wt_k27_peak_8592	477	WT	WT Specific
chr16	59650166	59650459	chr16	59650166	59650459	wt_k27_peak_8594	293	WT	WT Specific
chr16	60602890	60603166	chr16	60602890	60603166	wt_k27_peak_8595	276	WT	WT Specific
chr16	62501058	62501573	chr16	62501058	62501573	wt_k27_peak_8597	515	WT	WT Specific
chr16	62714066	62714366	chr16	62714066	62714366	wt_k27_peak_8598	300	WT	WT Specific
chr16	62848169	62848813	chr16	62848169	62848813	wt_k27_peak_8599	644	WT	WT Specific
chr16	63866458	63866848	chr16	63866458	63866848	wt_k27_peak_8605	390	WT	WT Specific
chr16	63867217	63867585	chr16	63867217	63867585	wt_k27_peak_8606	368	WT	WT Specific
chr16	64775316	64776094	chr16	64775316	64776094	wt_k27_peak_8607	778	WT	WT Specific
chr16	75447803	75448170	chr16	75447803	75448170	wt_k27_peak_8618	367	WT	WT Specific
chr16	84548763	84549335	chr16	84548763	84549335	wt_k27_peak_8638	572	WT	WT Specific
chr16	85897437	85898217	chr16	85897437	85898217	wt_k27_peak_8648	780	WT	WT Specific
chr16	87455527	87455845	chr16	87455527	87455845	wt_k27_peak_8650	318	WT	WT Specific
chr16	87580848	87581115	chr16	87580848	87581115	wt_k27_peak_8651	267	WT	WT Specific
chr16	89818167	89818734	chr16	89818167	89818734	wt_k27_peak_8657	567	WT	WT Specific
chr16	90336296	90336661	chr16	90336296	90336661	wt_k27_peak_8662	365	WT	WT Specific
chr16	90377556	90378045	chr16	90377556	90378045	wt_k27_peak_8663	489	WT	WT Specific
chr16	90835378	90835659	chr16	90835378	90835659	wt_k27_peak_8672	281	WT	WT Specific
chr16	90841794	90842073	chr16	90841794	90842073	wt_k27_peak_8673	279	WT	WT Specific
chr16	91266572	91267094	chr16	91266572	91267094	wt_k27_peak_8682	522	WT	WT Specific
chr16	91277690	91278013	chr16	91277690	91278013	wt_k27_peak_8685	323	WT	WT Specific
chr16	91296720	91297253	chr16	91296720	91297253	wt_k27_peak_8686	533	WT	WT Specific
chr16	91305052	91306030	chr16	91305052	91306030	wt_k27_peak_8689	978	WT	WT Specific
chr16	91323733	91324203	chr16	91323733	91324203	wt_k27_peak_8691	470	WT	WT Specific
chr16	91430641	91430944	chr16	91430641	91430944	wt_k27_peak_8699	303	WT	WT Specific
chr16	91434073	91434737	chr16	91434073	91434737	wt_k27_peak_8700	664	WT	WT Specific
chr16	91941617	91942248	chr16	91941617	91942248	wt_k27_peak_8712	631	WT	WT Specific
chr16	92520707	92521197	chr16	92520707	92521197	wt_k27_peak_8723	490	WT	WT Specific
chr16	93436476	93436903	chr16	93436476	93436903	wt_k27_peak_8730	427	WT	WT Specific
chr16	94122195	94122575	chr16	94122195	94122575	wt_k27_peak_8736	380	WT	WT Specific
chr16	94301474	94301842	chr16	94301474	94301842	wt_k27_peak_8739	368	WT	WT Specific
chr16	94994509	94995194	chr16	94994509	94995194	wt_k27_peak_8746	685	WT	WT Specific
chr16	95340708	95340996	chr16	95340708	95340996	wt_k27_peak_8748	288	WT	WT Specific
chr16	96088727	96089457	chr16	96088727	96089457	wt_k27_peak_8756	730	WT	WT Specific
chr16	97928394	97928752	chr16	97928394	97928752	wt_k27_peak_8777	358	WT	WT Specific
chr17	4867068	4867780	chr17	4867068	4867780	wt_k27_peak_8783	712	WT	WT Specific
chr17	4945301	4945674	chr17	4945301	4945674	wt_k27_peak_8786	373	WT	WT Specific
chr17	5446533	5447084	chr17	5446533	5447084	wt_k27_peak_8790	551	WT	WT Specific
chr17	6856537	6856959	chr17	6856537	6856959	wt_k27_peak_8802	422	WT	WT Specific
chr17	8471236	8471587	chr17	8471236	8471587	wt_k27_peak_8834	351	WT	WT Specific
chr17	8594169	8594426	chr17	8594169	8594426	wt_k27_peak_8837	257	WT	WT Specific
chr17	12850952	12851365	chr17	12850952	12851365	wt_k27_peak_8857	413	WT	WT Specific
chr17	12862491	12862984	chr17	12862491	12862984	wt_k27_peak_8858	493	WT	WT Specific
chr17	13744310	13744568	chr17	13744310	13744568	wt_k27_peak_8861	258	WT	WT Specific
chr17	14138797	14139301	chr17	14138797	14139301	wt_k27_peak_8864	504	WT	WT Specific
chr17	14228082	14228488	chr17	14228082	14228488	wt_k27_peak_8869	406	WT	WT Specific
chr17	14702784	14703251	chr17	14702784	14703251	wt_k27_peak_8888	467	WT	WT Specific
chr17	14705491	14706166	chr17	14705491	14706166	wt_k27_peak_8889	675	WT	WT Specific
chr17	15267588	15268104	chr17	15267588	15268104	wt_k27_peak_8891	516	WT	WT Specific
chr17	15361755	15362223	chr17	15361755	15362223	wt_k27_peak_8893	468	WT	WT Specific
chr17	15550036	15550557	chr17	15550036	15550557	wt_k27_peak_8899	521	WT	WT Specific
chr17	15551463	15551762	chr17	15551463	15551762	wt_k27_peak_8900	299	WT	WT Specific
chr17	15574834	15575204	chr17	15574834	15575204	wt_k27_peak_8903	370	WT	WT Specific
chr17	17347134	17348591	chr17	17347134	17348591	wt_k27_peak_8908	1457	WT	WT Specific
chr17	17804306	17804563	chr17	17804306	17804563	wt_k27_peak_8909	257	WT	WT Specific
chr17	21384427	21384715	chr17	21384427	21384715	wt_k27_peak_8915	288	WT	WT Specific
chr17	21442929	21443292	chr17	21442929	21443292	wt_k27_peak_8917	363	WT	WT Specific
chr17	22332556	22332828	chr17	22332556	22332828	wt_k27_peak_8922	272	WT	WT Specific
chr17	23616070	23616371	chr17	23616070	23616371	wt_k27_peak_8925	301	WT	WT Specific
chr17	23657154	23657468	chr17	23657154	23657468	wt_k27_peak_8929	314	WT	WT Specific
chr17	24041232	24041646	chr17	24041232	24041646	wt_k27_peak_8939	414	WT	WT Specific
chr17	25559207	25559636	chr17	25559207	25559636	wt_k27_peak_8970	429	WT	WT Specific
chr17	25685293	25685632	chr17	25685293	25685632	wt_k27_peak_8977	339	WT	WT Specific
chr17	26860868	26861125	chr17	26860868	26861125	wt_k27_peak_9000	257	WT	WT Specific
chr17	26862034	26862362	chr17	26862034	26862362	wt_k27_peak_9001	328	WT	WT Specific
chr17	27005602	27006127	chr17	27005602	27006127	wt_k27_peak_9009	525	WT	WT Specific
chr17	28377263	28377564	chr17	28377263	28377564	wt_k27_peak_9041	301	WT	WT Specific
chr17	28576690	28577097	chr17	28576690	28577097	wt_k27_peak_9052	407	WT	WT Specific
chr17	29214311	29214581	chr17	29214311	29214581	wt_k27_peak_9059	270	WT	WT Specific
chr17	29537853	29538159	chr17	29537853	29538159	wt_k27_peak_9071	306	WT	WT Specific
chr17	29778151	29778430	chr17	29778151	29778430	wt_k27_peak_9074	279	WT	WT Specific
chr17	29965693	29966472	chr17	29965693	29966472	wt_k27_peak_9081	779	WT	WT Specific
chr17	32111067	32111477	chr17	32111067	32111477	wt_k27_peak_9103	410	WT	WT Specific
chr17	32412861	32413145	chr17	32412861	32413145	wt_k27_peak_9111	284	WT	WT Specific
chr17	32493107	32493805	chr17	32493107	32493805	wt_k27_peak_9114	698	WT	WT Specific
chr17	33988204	33989271	chr17	33988204	33989271	wt_k27_peak_9120	1067	WT	WT Specific
chr17	34136981	34137351	chr17	34136981	34137351	wt_k27_peak_9130	370	WT	WT Specific
chr17	34208936	34209262	chr17	34208936	34209262	wt_k27_peak_9142	326	WT	WT Specific
chr17	34352142	34352480	chr17	34352142	34352480	wt_k27_peak_9151	338	WT	WT Specific
chr17	34372880	34373189	chr17	34372880	34373189	wt_k27_peak_9152	309	WT	WT Specific
chr17	35276919	35277687	chr17	35276919	35277687	wt_k27_peak_9194	768	WT	WT Specific
chr17	35290342	35290650	chr17	35290342	35290650	wt_k27_peak_9195	308	WT	WT Specific
chr17	35570254	35570838	chr17	35570254	35570838	wt_k27_peak_9212	584	WT	WT Specific
chr17	35644256	35645175	chr17	35644256	35645175	wt_k27_peak_9216	919	WT	WT Specific
chr17	35789687	35790081	chr17	35789687	35790081	wt_k27_peak_9224	394	WT	WT Specific
chr17	36032089	36032401	chr17	36032089	36032401	wt_k27_peak_9229	312	WT	WT Specific
chr17	36042882	36043139	chr17	36042882	36043139	wt_k27_peak_9231	257	WT	WT Specific
chr17	36043498	36043769	chr17	36043498	36043769	wt_k27_peak_9232	271	WT	WT Specific
chr17	36168266	36168656	chr17	36168266	36168656	wt_k27_peak_9241	390	WT	WT Specific
chr17	36232334	36232770	chr17	36232334	36232770	wt_k27_peak_9249	436	WT	WT Specific
chr17	36236641	36237365	chr17	36236641	36237365	wt_k27_peak_9250	724	WT	WT Specific
chr17	36242402	36243219	chr17	36242402	36243219	wt_k27_peak_9252	817	WT	WT Specific
chr17	36249563	36249959	chr17	36249563	36249959	wt_k27_peak_9254	396	WT	WT Specific
chr17	36828000	36828306	chr17	36828000	36828306	wt_k27_peak_9256	306	WT	WT Specific
chr17	36871318	36872480	chr17	36871318	36872480	wt_k27_peak_9258	1162	WT	WT Specific
chr17	36987949	36988401	chr17	36987949	36988401	wt_k27_peak_9263	452	WT	WT Specific
chr17	37047207	37047779	chr17	37047207	37047779	wt_k27_peak_9264	572	WT	WT Specific
chr17	37049138	37049402	chr17	37049138	37049402	wt_k27_peak_9266	264	WT	WT Specific
chr17	37078428	37078883	chr17	37078428	37078883	wt_k27_peak_9270	455	WT	WT Specific
chr17	37989367	37990425	chr17	37989367	37990425	wt_k27_peak_9277	1058	WT	WT Specific
chr17	37991321	37991676	chr17	37991321	37991676	wt_k27_peak_9278	355	WT	WT Specific
chr17	43624318	43624580	chr17	43624318	43624580	wt_k27_peak_9292	262	WT	WT Specific
chr17	44263539	44263958	chr17	44263539	44263958	wt_k27_peak_9304	419	WT	WT Specific
chr17	45709082	45709371	chr17	45709082	45709371	wt_k27_peak_9321	289	WT	WT Specific
chr17	45850804	45851068	chr17	45850804	45851068	wt_k27_peak_9327	264	WT	WT Specific
chr17	45873353	45873610	chr17	45873353	45873610	wt_k27_peak_9329	257	WT	WT Specific
chr17	47319915	47320213	chr17	47319915	47320213	wt_k27_peak_9363	298	WT	WT Specific
chr17	47391623	47391988	chr17	47391623	47391988	wt_k27_peak_9364	365	WT	WT Specific
chr17	47669806	47670214	chr17	47669806	47670214	wt_k27_peak_9376	408	WT	WT Specific
chr17	47852319	47852611	chr17	47852319	47852611	wt_k27_peak_9386	292	WT	WT Specific
chr17	47903205	47903604	chr17	47903205	47903604	wt_k27_peak_9390	399	WT	WT Specific
chr17	48014163	48014602	chr17	48014163	48014602	wt_k27_peak_9402	439	WT	WT Specific
chr17	48047652	48048094	chr17	48047652	48048094	wt_k27_peak_9410	442	WT	WT Specific
chr17	48054326	48054694	chr17	48054326	48054694	wt_k27_peak_9411	368	WT	WT Specific
chr17	48346782	48347214	chr17	48346782	48347214	wt_k27_peak_9417	432	WT	WT Specific
chr17	48464495	48465126	chr17	48464495	48465126	wt_k27_peak_9418	631	WT	WT Specific
chr17	48465635	48466185	chr17	48465635	48466185	wt_k27_peak_9419	550	WT	WT Specific
chr17	48556241	48556632	chr17	48556241	48556632	wt_k27_peak_9425	391	WT	WT Specific
chr17	48661859	48662341	chr17	48661859	48662341	wt_k27_peak_9426	482	WT	WT Specific
chr17	49523350	49523690	chr17	49523350	49523690	wt_k27_peak_9435	340	WT	WT Specific
chr17	49952097	49952369	chr17	49952097	49952369	wt_k27_peak_9441	272	WT	WT Specific
chr17	50426821	50427509	chr17	50426821	50427509	wt_k27_peak_9445	688	WT	WT Specific
chr17	50697844	50698387	chr17	50697844	50698387	wt_k27_peak_9448	543	WT	WT Specific
chr17	51633990	51634247	chr17	51633990	51634247	wt_k27_peak_9450	257	WT	WT Specific
chr17	54296823	54297418	chr17	54296823	54297418	wt_k27_peak_9455	595	WT	WT Specific
chr17	56151510	56151787	chr17	56151510	56151787	wt_k27_peak_9470	277	WT	WT Specific
chr17	56481402	56482061	chr17	56481402	56482061	wt_k27_peak_9479	659	WT	WT Specific
chr17	56490294	56491178	chr17	56490294	56491178	wt_k27_peak_9481	884	WT	WT Specific
chr17	56502030	56502588	chr17	56502030	56502588	wt_k27_peak_9485	558	WT	WT Specific
chr17	56829476	56830605	chr17	56829476	56830605	wt_k27_peak_9499	1129	WT	WT Specific
chr17	57035635	57035901	chr17	57035635	57035901	wt_k27_peak_9502	266	WT	WT Specific
chr17	57114394	57114678	chr17	57114394	57114678	wt_k27_peak_9513	284	WT	WT Specific
chr17	57126345	57126750	chr17	57126345	57126750	wt_k27_peak_9515	405	WT	WT Specific
chr17	57142934	57144131	chr17	57142934	57144131	wt_k27_peak_9521	1197	WT	WT Specific
chr17	57151850	57152174	chr17	57151850	57152174	wt_k27_peak_9523	324	WT	WT Specific
chr17	58937693	58938170	chr17	58937693	58938170	wt_k27_peak_9528	477	WT	WT Specific
chr17	62887635	62888140	chr17	62887635	62888140	wt_k27_peak_9534	505	WT	WT Specific
chr17	65538762	65539038	chr17	65538762	65539038	wt_k27_peak_9539	276	WT	WT Specific
chr17	65891614	65891881	chr17	65891614	65891881	wt_k27_peak_9542	267	WT	WT Specific
chr17	66229828	66230457	chr17	66229828	66230457	wt_k27_peak_9545	629	WT	WT Specific
chr17	69436605	69436930	chr17	69436605	69436930	wt_k27_peak_9564	325	WT	WT Specific
chr17	69973691	69974047	chr17	69973691	69974047	wt_k27_peak_9569	356	WT	WT Specific
chr17	71019407	71019748	chr17	71019407	71019748	wt_k27_peak_9574	341	WT	WT Specific
chr17	71604906	71605248	chr17	71604906	71605248	wt_k27_peak_9587	342	WT	WT Specific
chr17	71612641	71612953	chr17	71612641	71612953	wt_k27_peak_9588	312	WT	WT Specific
chr17	71871932	71872225	chr17	71871932	71872225	wt_k27_peak_9594	293	WT	WT Specific
chr17	78751115	78751725	chr17	78751115	78751725	wt_k27_peak_9626	610	WT	WT Specific
chr17	80370284	80370580	chr17	80370284	80370580	wt_k27_peak_9640	296	WT	WT Specific
chr17	83128502	83129070	chr17	83128502	83129070	wt_k27_peak_9649	568	WT	WT Specific
chr17	83204439	83204717	chr17	83204439	83204717	wt_k27_peak_9652	278	WT	WT Specific
chr17	83284914	83285207	chr17	83284914	83285207	wt_k27_peak_9663	293	WT	WT Specific
chr17	83538860	83539324	chr17	83538860	83539324	wt_k27_peak_9666	464	WT	WT Specific
chr17	83999334	83999591	chr17	83999334	83999591	wt_k27_peak_9672	257	WT	WT Specific
chr17	84510418	84510776	chr17	84510418	84510776	wt_k27_peak_9684	358	WT	WT Specific
chr17	85491596	85492101	chr17	85491596	85492101	wt_k27_peak_9701	505	WT	WT Specific
chr17	85661124	85661806	chr17	85661124	85661806	wt_k27_peak_9709	682	WT	WT Specific
chr17	85671532	85671941	chr17	85671532	85671941	wt_k27_peak_9714	409	WT	WT Specific
chr17	86669760	86670066	chr17	86669760	86670066	wt_k27_peak_9727	306	WT	WT Specific
chr17	87093116	87093373	chr17	87093116	87093373	wt_k27_peak_9733	257	WT	WT Specific
chr17	87268595	87268908	chr17	87268595	87268908	wt_k27_peak_9737	313	WT	WT Specific
chr17	87418638	87418940	chr17	87418638	87418940	wt_k27_peak_9742	302	WT	WT Specific
chr17	88438889	88439281	chr17	88438889	88439281	wt_k27_peak_9756	392	WT	WT Specific
chr17	94841599	94841883	chr17	94841599	94841883	wt_k27_peak_9774	284	WT	WT Specific
chr18	4350250	4350572	chr18	4350250	4350572	wt_k27_peak_9778	322	WT	WT Specific
chr18	7012477	7012948	chr18	7012477	7012948	wt_k27_peak_9787	471	WT	WT Specific
chr18	7631613	7632082	chr18	7631613	7632082	wt_k27_peak_9788	469	WT	WT Specific
chr18	9228152	9228710	chr18	9228152	9228710	wt_k27_peak_9792	558	WT	WT Specific
chr18	10198011	10198323	chr18	10198011	10198323	wt_k27_peak_9796	312	WT	WT Specific
chr18	10886945	10887321	chr18	10886945	10887321	wt_k27_peak_9813	376	WT	WT Specific
chr18	11450479	11450738	chr18	11450479	11450738	wt_k27_peak_9820	259	WT	WT Specific
chr18	15073550	15074595	chr18	15073550	15074595	wt_k27_peak_9842	1045	WT	WT Specific
chr18	20040041	20040383	chr18	20040041	20040383	wt_k27_peak_9856	342	WT	WT Specific
chr18	20047365	20047734	chr18	20047365	20047734	wt_k27_peak_9860	369	WT	WT Specific
chr18	22267105	22267382	chr18	22267105	22267382	wt_k27_peak_9867	277	WT	WT Specific
chr18	23034850	23035180	chr18	23034850	23035180	wt_k27_peak_9871	330	WT	WT Specific
chr18	24043787	24044051	chr18	24043787	24044051	wt_k27_peak_9878	264	WT	WT Specific
chr18	24195952	24196286	chr18	24195952	24196286	wt_k27_peak_9879	334	WT	WT Specific
chr18	24198757	24199262	chr18	24198757	24199262	wt_k27_peak_9881	505	WT	WT Specific
chr18	24310884	24311417	chr18	24310884	24311417	wt_k27_peak_9888	533	WT	WT Specific
chr18	24333712	24334280	chr18	24333712	24334280	wt_k27_peak_9893	568	WT	WT Specific
chr18	24359907	24360269	chr18	24359907	24360269	wt_k27_peak_9894	362	WT	WT Specific
chr18	24464025	24464733	chr18	24464025	24464733	wt_k27_peak_9899	708	WT	WT Specific
chr18	25557543	25557811	chr18	25557543	25557811	wt_k27_peak_9921	268	WT	WT Specific
chr18	25620430	25620738	chr18	25620430	25620738	wt_k27_peak_9930	308	WT	WT Specific
chr18	25660387	25660661	chr18	25660387	25660661	wt_k27_peak_9932	274	WT	WT Specific
chr18	28078634	28078931	chr18	28078634	28078931	wt_k27_peak_9945	297	WT	WT Specific
chr18	30267615	30267921	chr18	30267615	30267921	wt_k27_peak_9947	306	WT	WT Specific
chr18	31624242	31624833	chr18	31624242	31624833	wt_k27_peak_9949	591	WT	WT Specific
chr18	32416712	32417253	chr18	32416712	32417253	wt_k27_peak_9960	541	WT	WT Specific
chr18	32443850	32444202	chr18	32443850	32444202	wt_k27_peak_9961	352	WT	WT Specific
chr18	34209904	34210162	chr18	34209904	34210162	wt_k27_peak_9979	258	WT	WT Specific
chr18	34564301	34564798	chr18	34564301	34564798	wt_k27_peak_9994	497	WT	WT Specific
chr18	34566780	34567037	chr18	34566780	34567037	wt_k27_peak_9996	257	WT	WT Specific
chr18	35534712	35535014	chr18	35534712	35535014	wt_k27_peak_10010	302	WT	WT Specific
chr18	35548738	35549531	chr18	35548738	35549531	wt_k27_peak_10014	793	WT	WT Specific
chr18	35550422	35551251	chr18	35550422	35551251	wt_k27_peak_10015	829	WT	WT Specific
chr18	35648398	35648702	chr18	35648398	35648702	wt_k27_peak_10017	304	WT	WT Specific
chr18	35884994	35885479	chr18	35884994	35885479	wt_k27_peak_10031	485	WT	WT Specific
chr18	35897519	35898032	chr18	35897519	35898032	wt_k27_peak_10035	513	WT	WT Specific
chr18	35898465	35898746	chr18	35898465	35898746	wt_k27_peak_10036	281	WT	WT Specific
chr18	35925307	35925683	chr18	35925307	35925683	wt_k27_peak_10043	376	WT	WT Specific
chr18	35981987	35982299	chr18	35981987	35982299	wt_k27_peak_10051	312	WT	WT Specific
chr18	36004010	36004314	chr18	36004010	36004314	wt_k27_peak_10052	304	WT	WT Specific
chr18	36028582	36029126	chr18	36028582	36029126	wt_k27_peak_10054	544	WT	WT Specific
chr18	36033026	36033362	chr18	36033026	36033362	wt_k27_peak_10055	336	WT	WT Specific
chr18	36208911	36209191	chr18	36208911	36209191	wt_k27_peak_10061	280	WT	WT Specific
chr18	36233538	36233929	chr18	36233538	36233929	wt_k27_peak_10062	391	WT	WT Specific
chr18	36488639	36489096	chr18	36488639	36489096	wt_k27_peak_10069	457	WT	WT Specific
chr18	36719371	36719711	chr18	36719371	36719711	wt_k27_peak_10072	340	WT	WT Specific
chr18	36720137	36720592	chr18	36720137	36720592	wt_k27_peak_10073	455	WT	WT Specific
chr18	36721107	36721384	chr18	36721107	36721384	wt_k27_peak_10074	277	WT	WT Specific
chr18	36927127	36927533	chr18	36927127	36927533	wt_k27_peak_10078	406	WT	WT Specific
chr18	37028561	37028962	chr18	37028561	37028962	wt_k27_peak_10093	401	WT	WT Specific
chr18	37150422	37151188	chr18	37150422	37151188	wt_k27_peak_10097	766	WT	WT Specific
chr18	37267599	37267856	chr18	37267599	37267856	wt_k27_peak_10101	257	WT	WT Specific
chr18	37317284	37317695	chr18	37317284	37317695	wt_k27_peak_10106	411	WT	WT Specific
chr18	37351455	37351879	chr18	37351455	37351879	wt_k27_peak_10115	424	WT	WT Specific
chr18	37409839	37410437	chr18	37409839	37410437	wt_k27_peak_10118	598	WT	WT Specific
chr18	37415983	37416330	chr18	37415983	37416330	wt_k27_peak_10120	347	WT	WT Specific
chr18	37987752	37988150	chr18	37987752	37988150	wt_k27_peak_10158	398	WT	WT Specific
chr18	37999388	38000021	chr18	37999388	38000021	wt_k27_peak_10161	633	WT	WT Specific
chr18	38011515	38011904	chr18	38011515	38011904	wt_k27_peak_10162	389	WT	WT Specific
chr18	38133049	38133335	chr18	38133049	38133335	wt_k27_peak_10177	286	WT	WT Specific
chr18	38154956	38155341	chr18	38154956	38155341	wt_k27_peak_10182	385	WT	WT Specific
chr18	38178435	38179026	chr18	38178435	38179026	wt_k27_peak_10186	591	WT	WT Specific
chr18	38942279	38942561	chr18	38942279	38942561	wt_k27_peak_10206	282	WT	WT Specific
chr18	38990165	38990566	chr18	38990165	38990566	wt_k27_peak_10207	401	WT	WT Specific
chr18	39494923	39495180	chr18	39494923	39495180	wt_k27_peak_10212	257	WT	WT Specific
chr18	44817854	44818760	chr18	44817854	44818760	wt_k27_peak_10238	906	WT	WT Specific
chr18	46152215	46152503	chr18	46152215	46152503	wt_k27_peak_10245	288	WT	WT Specific
chr18	46468391	46468893	chr18	46468391	46468893	wt_k27_peak_10252	502	WT	WT Specific
chr18	46575832	46576089	chr18	46575832	46576089	wt_k27_peak_10254	257	WT	WT Specific
chr18	46724406	46724756	chr18	46724406	46724756	wt_k27_peak_10255	350	WT	WT Specific
chr18	47149801	47151009	chr18	47149801	47151009	wt_k27_peak_10260	1208	WT	WT Specific
chr18	47403990	47404672	chr18	47403990	47404672	wt_k27_peak_10267	682	WT	WT Specific
chr18	47704584	47704887	chr18	47704584	47704887	wt_k27_peak_10271	303	WT	WT Specific
chr18	49977408	49977951	chr18	49977408	49977951	wt_k27_peak_10272	543	WT	WT Specific
chr18	53449479	53449988	chr18	53449479	53449988	wt_k27_peak_10286	509	WT	WT Specific
chr18	53457048	53457606	chr18	53457048	53457606	wt_k27_peak_10288	558	WT	WT Specific
chr18	54768508	54768900	chr18	54768508	54768900	wt_k27_peak_10294	392	WT	WT Specific
chr18	54950422	54950708	chr18	54950422	54950708	wt_k27_peak_10297	286	WT	WT Specific
chr18	57818926	57819391	chr18	57818926	57819391	wt_k27_peak_10312	465	WT	WT Specific
chr18	57865692	57866096	chr18	57865692	57866096	wt_k27_peak_10313	404	WT	WT Specific
chr18	58659677	58660123	chr18	58659677	58660123	wt_k27_peak_10319	446	WT	WT Specific
chr18	58839112	58839395	chr18	58839112	58839395	wt_k27_peak_10321	283	WT	WT Specific
chr18	60502324	60502807	chr18	60502324	60502807	wt_k27_peak_10331	483	WT	WT Specific
chr18	60591128	60591483	chr18	60591128	60591483	wt_k27_peak_10332	355	WT	WT Specific
chr18	60797030	60797347	chr18	60797030	60797347	wt_k27_peak_10341	317	WT	WT Specific
chr18	61419206	61419507	chr18	61419206	61419507	wt_k27_peak_10370	301	WT	WT Specific
chr18	61533441	61533824	chr18	61533441	61533824	wt_k27_peak_10372	383	WT	WT Specific
chr18	62319091	62319761	chr18	62319091	62319761	wt_k27_peak_10380	670	WT	WT Specific
chr18	64327865	64328152	chr18	64327865	64328152	wt_k27_peak_10388	287	WT	WT Specific
chr18	64517381	64517939	chr18	64517381	64517939	wt_k27_peak_10390	558	WT	WT Specific
chr18	64890517	64890847	chr18	64890517	64890847	wt_k27_peak_10397	330	WT	WT Specific
chr18	65705010	65705480	chr18	65705010	65705480	wt_k27_peak_10401	470	WT	WT Specific
chr18	65846817	65847239	chr18	65846817	65847239	wt_k27_peak_10405	422	WT	WT Specific
chr18	65855053	65855432	chr18	65855053	65855432	wt_k27_peak_10406	379	WT	WT Specific
chr18	66506613	66507007	chr18	66506613	66507007	wt_k27_peak_10444	394	WT	WT Specific
chr18	67029470	67029740	chr18	67029470	67029740	wt_k27_peak_10450	270	WT	WT Specific
chr18	69016622	69016879	chr18	69016622	69016879	wt_k27_peak_10474	257	WT	WT Specific
chr18	69834482	69834865	chr18	69834482	69834865	wt_k27_peak_10478	383	WT	WT Specific
chr18	70646397	70646728	chr18	70646397	70646728	wt_k27_peak_10480	331	WT	WT Specific
chr18	73858887	73859367	chr18	73858887	73859367	wt_k27_peak_10496	480	WT	WT Specific
chr18	74966700	74967068	chr18	74966700	74967068	wt_k27_peak_10510	368	WT	WT Specific
chr18	74994480	74994984	chr18	74994480	74994984	wt_k27_peak_10511	504	WT	WT Specific
chr18	74995670	74995937	chr18	74995670	74995937	wt_k27_peak_10512	267	WT	WT Specific
chr18	75435491	75435851	chr18	75435491	75435851	wt_k27_peak_10518	360	WT	WT Specific
chr18	75723798	75724104	chr18	75723798	75724104	wt_k27_peak_10523	306	WT	WT Specific
chr18	75756109	75756415	chr18	75756109	75756415	wt_k27_peak_10524	306	WT	WT Specific
chr18	76373880	76374504	chr18	76373880	76374504	wt_k27_peak_10536	624	WT	WT Specific
chr18	76569037	76569581	chr18	76569037	76569581	wt_k27_peak_10544	544	WT	WT Specific
chr18	76752796	76753094	chr18	76752796	76753094	wt_k27_peak_10545	298	WT	WT Specific
chr18	77440444	77441005	chr18	77440444	77441005	wt_k27_peak_10564	561	WT	WT Specific
chr18	77745255	77745570	chr18	77745255	77745570	wt_k27_peak_10568	315	WT	WT Specific
chr18	77808481	77808743	chr18	77808481	77808743	wt_k27_peak_10570	262	WT	WT Specific
chr18	77819191	77819775	chr18	77819191	77819775	wt_k27_peak_10571	584	WT	WT Specific
chr18	78053078	78053386	chr18	78053078	78053386	wt_k27_peak_10574	308	WT	WT Specific
chr18	78124595	78124871	chr18	78124595	78124871	wt_k27_peak_10576	276	WT	WT Specific
chr18	79898238	79898862	chr18	79898238	79898862	wt_k27_peak_10583	624	WT	WT Specific
chr18	79992810	79993434	chr18	79992810	79993434	wt_k27_peak_10585	624	WT	WT Specific
chr18	80496812	80497359	chr18	80496812	80497359	wt_k27_peak_10619	547	WT	WT Specific
chr18	80631185	80631536	chr18	80631185	80631536	wt_k27_peak_10625	351	WT	WT Specific
chr18	81198268	81198864	chr18	81198268	81198864	wt_k27_peak_10637	596	WT	WT Specific
chr18	82167921	82168351	chr18	82167921	82168351	wt_k27_peak_10641	430	WT	WT Specific
chr18	82514487	82514842	chr18	82514487	82514842	wt_k27_peak_10648	355	WT	WT Specific
chr18	82797862	82798135	chr18	82797862	82798135	wt_k27_peak_10654	273	WT	WT Specific
chr18	82833740	82834277	chr18	82833740	82834277	wt_k27_peak_10656	537	WT	WT Specific
chr18	82837418	82837786	chr18	82837418	82837786	wt_k27_peak_10657	368	WT	WT Specific
chr18	82852381	82853257	chr18	82852381	82853257	wt_k27_peak_10660	876	WT	WT Specific
chr18	82877837	82878395	chr18	82877837	82878395	wt_k27_peak_10665	558	WT	WT Specific
chr18	82955643	82956196	chr18	82955643	82956196	wt_k27_peak_10669	553	WT	WT Specific
chr18	83060327	83060850	chr18	83060327	83060850	wt_k27_peak_10670	523	WT	WT Specific
chr18	84772950	84773378	chr18	84772950	84773378	wt_k27_peak_10683	428	WT	WT Specific
chr18	85330299	85330827	chr18	85330299	85330827	wt_k27_peak_10687	528	WT	WT Specific
chr18	85770570	85770970	chr18	85770570	85770970	wt_k27_peak_10688	400	WT	WT Specific
chr18	86556803	86557163	chr18	86556803	86557163	wt_k27_peak_10690	360	WT	WT Specific
chr19	3306202	3306507	chr19	3306202	3306507	wt_k27_peak_10695	305	WT	WT Specific
chr19	3309703	3310182	chr19	3309703	3310182	wt_k27_peak_10697	479	WT	WT Specific
chr19	3433744	3434262	chr19	3433744	3434262	wt_k27_peak_10703	518	WT	WT Specific
chr19	4226788	4227194	chr19	4226788	4227194	wt_k27_peak_10714	406	WT	WT Specific
chr19	4267954	4268370	chr19	4267954	4268370	wt_k27_peak_10717	416	WT	WT Specific
chr19	4693338	4693670	chr19	4693338	4693670	wt_k27_peak_10727	332	WT	WT Specific
chr19	4938443	4938860	chr19	4938443	4938860	wt_k27_peak_10735	417	WT	WT Specific
chr19	4959864	4960542	chr19	4959864	4960542	wt_k27_peak_10738	678	WT	WT Specific
chr19	5073652	5075556	chr19	5073652	5075556	wt_k27_peak_10750	1904	WT	WT Specific
chr19	5306715	5307128	chr19	5306715	5307128	wt_k27_peak_10755	413	WT	WT Specific
chr19	5324467	5324879	chr19	5324467	5324879	wt_k27_peak_10757	412	WT	WT Specific
chr19	5922898	5923222	chr19	5922898	5923222	wt_k27_peak_10776	324	WT	WT Specific
chr19	5935014	5935399	chr19	5935014	5935399	wt_k27_peak_10778	385	WT	WT Specific
chr19	7555289	7555598	chr19	7555289	7555598	wt_k27_peak_10817	309	WT	WT Specific
chr19	8578990	8579349	chr19	8578990	8579349	wt_k27_peak_10827	359	WT	WT Specific
chr19	10301606	10302626	chr19	10301606	10302626	wt_k27_peak_10842	1020	WT	WT Specific
chr19	10306635	10307567	chr19	10306635	10307567	wt_k27_peak_10845	932	WT	WT Specific
chr19	10319204	10319780	chr19	10319204	10319780	wt_k27_peak_10846	576	WT	WT Specific
chr19	10563989	10564547	chr19	10563989	10564547	wt_k27_peak_10865	558	WT	WT Specific
chr19	10648766	10649245	chr19	10648766	10649245	wt_k27_peak_10868	479	WT	WT Specific
chr19	10799486	10799973	chr19	10799486	10799973	wt_k27_peak_10872	487	WT	WT Specific
chr19	10802646	10802945	chr19	10802646	10802945	wt_k27_peak_10874	299	WT	WT Specific
chr19	10832024	10832500	chr19	10832024	10832500	wt_k27_peak_10875	476	WT	WT Specific
chr19	10935211	10935639	chr19	10935211	10935639	wt_k27_peak_10879	428	WT	WT Specific
chr19	10978491	10978763	chr19	10978491	10978763	wt_k27_peak_10883	272	WT	WT Specific
chr19	11892962	11893327	chr19	11892962	11893327	wt_k27_peak_10896	365	WT	WT Specific
chr19	12753759	12754016	chr19	12753759	12754016	wt_k27_peak_10905	257	WT	WT Specific
chr19	14406141	14406552	chr19	14406141	14406552	wt_k27_peak_10906	411	WT	WT Specific
chr19	14892654	14892914	chr19	14892654	14892914	wt_k27_peak_10908	260	WT	WT Specific
chr19	15931828	15932186	chr19	15931828	15932186	wt_k27_peak_10916	358	WT	WT Specific
chr19	16863654	16863938	chr19	16863654	16863938	wt_k27_peak_10931	284	WT	WT Specific
chr19	17833075	17833384	chr19	17833075	17833384	wt_k27_peak_10942	309	WT	WT Specific
chr19	17839775	17840578	chr19	17839775	17840578	wt_k27_peak_10944	803	WT	WT Specific
chr19	21374517	21374792	chr19	21374517	21374792	wt_k27_peak_10949	275	WT	WT Specific
chr19	21738020	21738343	chr19	21738020	21738343	wt_k27_peak_10952	323	WT	WT Specific
chr19	21748363	21748665	chr19	21748363	21748665	wt_k27_peak_10955	302	WT	WT Specific
chr19	23370374	23370676	chr19	23370374	23370676	wt_k27_peak_10963	302	WT	WT Specific
chr19	23651295	23651552	chr19	23651295	23651552	wt_k27_peak_10966	257	WT	WT Specific
chr19	24886141	24886468	chr19	24886141	24886468	wt_k27_peak_10986	327	WT	WT Specific
chr19	24888582	24889365	chr19	24888582	24889365	wt_k27_peak_10987	783	WT	WT Specific
chr19	25407446	25408130	chr19	25407446	25408130	wt_k27_peak_10999	684	WT	WT Specific
chr19	26749797	26750130	chr19	26749797	26750130	wt_k27_peak_11015	333	WT	WT Specific
chr19	27211066	27211346	chr19	27211066	27211346	wt_k27_peak_11017	280	WT	WT Specific
chr19	27436008	27436717	chr19	27436008	27436717	wt_k27_peak_11019	709	WT	WT Specific
chr19	29323314	29323664	chr19	29323314	29323664	wt_k27_peak_11035	350	WT	WT Specific
chr19	30507564	30507821	chr19	30507564	30507821	wt_k27_peak_11049	257	WT	WT Specific
chr19	30540164	30540670	chr19	30540164	30540670	wt_k27_peak_11050	506	WT	WT Specific
chr19	30541334	30541913	chr19	30541334	30541913	wt_k27_peak_11051	579	WT	WT Specific
chr19	30665415	30665676	chr19	30665415	30665676	wt_k27_peak_11056	261	WT	WT Specific
chr19	34292056	34292347	chr19	34292056	34292347	wt_k27_peak_11069	291	WT	WT Specific
chr19	34637582	34638192	chr19	34637582	34638192	wt_k27_peak_11073	610	WT	WT Specific
chr19	36339648	36340030	chr19	36339648	36340030	wt_k27_peak_11082	382	WT	WT Specific
chr19	37232262	37232519	chr19	37232262	37232519	wt_k27_peak_11097	257	WT	WT Specific
chr19	37430068	37430467	chr19	37430068	37430467	wt_k27_peak_11101	399	WT	WT Specific
chr19	37734734	37735037	chr19	37734734	37735037	wt_k27_peak_11111	303	WT	WT Specific
chr19	38835298	38835662	chr19	38835298	38835662	wt_k27_peak_11126	364	WT	WT Specific
chr19	40891846	40892232	chr19	40891846	40892232	wt_k27_peak_11135	386	WT	WT Specific
chr19	41054294	41054683	chr19	41054294	41054683	wt_k27_peak_11137	389	WT	WT Specific
chr19	41297350	41297684	chr19	41297350	41297684	wt_k27_peak_11140	334	WT	WT Specific
chr19	41481405	41481700	chr19	41481405	41481700	wt_k27_peak_11145	295	WT	WT Specific
chr19	41660303	41660756	chr19	41660303	41660756	wt_k27_peak_11148	453	WT	WT Specific
chr19	41664696	41665073	chr19	41664696	41665073	wt_k27_peak_11149	377	WT	WT Specific
chr19	41800814	41801109	chr19	41800814	41801109	wt_k27_peak_11155	295	WT	WT Specific
chr19	42058344	42058822	chr19	42058344	42058822	wt_k27_peak_11167	478	WT	WT Specific
chr19	42369347	42369676	chr19	42369347	42369676	wt_k27_peak_11176	329	WT	WT Specific
chr19	42616141	42616426	chr19	42616141	42616426	wt_k27_peak_11182	285	WT	WT Specific
chr19	42631489	42631798	chr19	42631489	42631798	wt_k27_peak_11183	309	WT	WT Specific
chr19	42690160	42690417	chr19	42690160	42690417	wt_k27_peak_11186	257	WT	WT Specific
chr19	42742448	42742745	chr19	42742448	42742745	wt_k27_peak_11187	297	WT	WT Specific
chr19	43026046	43026488	chr19	43026046	43026488	wt_k27_peak_11192	442	WT	WT Specific
chr19	43573240	43573658	chr19	43573240	43573658	wt_k27_peak_11201	418	WT	WT Specific
chr19	43629760	43630017	chr19	43629760	43630017	wt_k27_peak_11209	257	WT	WT Specific
chr19	43965714	43966281	chr19	43965714	43966281	wt_k27_peak_11217	567	WT	WT Specific
chr19	44150280	44150873	chr19	44150280	44150873	wt_k27_peak_11222	593	WT	WT Specific
chr19	44201239	44201711	chr19	44201239	44201711	wt_k27_peak_11225	472	WT	WT Specific
chr19	44231013	44231685	chr19	44231013	44231685	wt_k27_peak_11226	672	WT	WT Specific
chr19	44236691	44236950	chr19	44236691	44236950	wt_k27_peak_11227	259	WT	WT Specific
chr19	44372068	44372422	chr19	44372068	44372422	wt_k27_peak_11232	354	WT	WT Specific
chr19	44493363	44493861	chr19	44493363	44493861	wt_k27_peak_11237	498	WT	WT Specific
chr19	44497313	44497917	chr19	44497313	44497917	wt_k27_peak_11239	604	WT	WT Specific
chr19	44647503	44647765	chr19	44647503	44647765	wt_k27_peak_11247	262	WT	WT Specific
chr19	44689778	44690142	chr19	44689778	44690142	wt_k27_peak_11256	364	WT	WT Specific
chr19	44798850	44799330	chr19	44798850	44799330	wt_k27_peak_11262	480	WT	WT Specific
chr19	44908629	44908992	chr19	44908629	44908992	wt_k27_peak_11285	363	WT	WT Specific
chr19	45015743	45016443	chr19	45015743	45016443	wt_k27_peak_11288	700	WT	WT Specific
chr19	45129090	45129868	chr19	45129090	45129868	wt_k27_peak_11303	778	WT	WT Specific
chr19	45166325	45166736	chr19	45166325	45166736	wt_k27_peak_11312	411	WT	WT Specific
chr19	45328309	45328589	chr19	45328309	45328589	wt_k27_peak_11325	280	WT	WT Specific
chr19	45621210	45621700	chr19	45621210	45621700	wt_k27_peak_11331	490	WT	WT Specific
chr19	45716889	45717258	chr19	45716889	45717258	wt_k27_peak_11335	369	WT	WT Specific
chr19	45811209	45811558	chr19	45811209	45811558	wt_k27_peak_11337	349	WT	WT Specific
chr19	46128308	46128642	chr19	46128308	46128642	wt_k27_peak_11339	334	WT	WT Specific
chr19	46521756	46522190	chr19	46521756	46522190	wt_k27_peak_11366	434	WT	WT Specific
chr19	46527050	46527377	chr19	46527050	46527377	wt_k27_peak_11367	327	WT	WT Specific
chr19	46754108	46754452	chr19	46754108	46754452	wt_k27_peak_11369	344	WT	WT Specific
chr19	46756943	46757245	chr19	46756943	46757245	wt_k27_peak_11370	302	WT	WT Specific
chr19	47140866	47141369	chr19	47140866	47141369	wt_k27_peak_11374	503	WT	WT Specific
chr19	47541246	47541579	chr19	47541246	47541579	wt_k27_peak_11386	333	WT	WT Specific
chr19	47691444	47691862	chr19	47691444	47691862	wt_k27_peak_11388	418	WT	WT Specific
chr19	47956069	47956348	chr19	47956069	47956348	wt_k27_peak_11399	279	WT	WT Specific
chr19	49247873	49248203	chr19	49247873	49248203	wt_k27_peak_11403	330	WT	WT Specific
chr19	50183543	50184262	chr19	50183543	50184262	wt_k27_peak_11404	719	WT	WT Specific
chr19	50673714	50674301	chr19	50673714	50674301	wt_k27_peak_11405	587	WT	WT Specific
chr19	53143844	53144657	chr19	53143844	53144657	wt_k27_peak_11411	813	WT	WT Specific
chr19	53308309	53308616	chr19	53308309	53308616	wt_k27_peak_11414	307	WT	WT Specific
chr19	53425735	53426069	chr19	53425735	53426069	wt_k27_peak_11417	334	WT	WT Specific
chr19	56130517	56131208	chr19	56130517	56131208	wt_k27_peak_11439	691	WT	WT Specific
chr19	57528987	57529244	chr19	57528987	57529244	wt_k27_peak_11457	257	WT	WT Specific
chr19	57586860	57587174	chr19	57586860	57587174	wt_k27_peak_11458	314	WT	WT Specific
chr19	58950132	58950389	chr19	58950132	58950389	wt_k27_peak_11469	257	WT	WT Specific
chr19	58970803	58971105	chr19	58970803	58971105	wt_k27_peak_11473	302	WT	WT Specific
chr19	59353616	59354187	chr19	59353616	59354187	wt_k27_peak_11490	571	WT	WT Specific
chr19	59354812	59355159	chr19	59354812	59355159	wt_k27_peak_11491	347	WT	WT Specific
chr19	59390345	59391050	chr19	59390345	59391050	wt_k27_peak_11493	705	WT	WT Specific
chr19	59987041	59987416	chr19	59987041	59987416	wt_k27_peak_11499	375	WT	WT Specific
chr19	60461716	60462158	chr19	60461716	60462158	wt_k27_peak_11501	442	WT	WT Specific
chr19	60463779	60464509	chr19	60463779	60464509	wt_k27_peak_11502	730	WT	WT Specific
chr19	60625548	60626028	chr19	60625548	60626028	wt_k27_peak_11504	480	WT	WT Specific
chr19	60704858	60705115	chr19	60704858	60705115	wt_k27_peak_11505	257	WT	WT Specific
chr19	60705707	60707006	chr19	60705707	60707006	wt_k27_peak_11506	1299	WT	WT Specific
chr19	61176500	61176901	chr19	61176500	61176901	wt_k27_peak_11509	401	WT	WT Specific
chr19	61200486	61200779	chr19	61200486	61200779	wt_k27_peak_11510	293	WT	WT Specific
chr2	3348119	3348497	chr2	3348119	3348497	wt_k27_peak_11516	378	WT	WT Specific
chr2	3415645	3415910	chr2	3415645	3415910	wt_k27_peak_11517	265	WT	WT Specific
chr2	4398599	4398863	chr2	4398599	4398863	wt_k27_peak_11523	264	WT	WT Specific
chr2	4713555	4713820	chr2	4713555	4713820	wt_k27_peak_11531	265	WT	WT Specific
chr2	6130805	6131410	chr2	6130805	6131410	wt_k27_peak_11541	605	WT	WT Specific
chr2	9627217	9627624	chr2	9627217	9627624	wt_k27_peak_11549	407	WT	WT Specific
chr2	10147180	10147537	chr2	10147180	10147537	wt_k27_peak_11555	357	WT	WT Specific
chr2	10330691	10330978	chr2	10330691	10330978	wt_k27_peak_11560	287	WT	WT Specific
chr2	11114336	11114852	chr2	11114336	11114852	wt_k27_peak_11571	516	WT	WT Specific
chr2	11533276	11533744	chr2	11533276	11533744	wt_k27_peak_11575	468	WT	WT Specific
chr2	11556152	11556519	chr2	11556152	11556519	wt_k27_peak_11580	367	WT	WT Specific
chr2	11652163	11652467	chr2	11652163	11652467	wt_k27_peak_11581	304	WT	WT Specific
chr2	13015188	13015711	chr2	13015188	13015711	wt_k27_peak_11589	523	WT	WT Specific
chr2	13273264	13273521	chr2	13273264	13273521	wt_k27_peak_11590	257	WT	WT Specific
chr2	13273972	13274395	chr2	13273972	13274395	wt_k27_peak_11591	423	WT	WT Specific
chr2	14607384	14607705	chr2	14607384	14607705	wt_k27_peak_11604	321	WT	WT Specific
chr2	16357524	16357986	chr2	16357524	16357986	wt_k27_peak_11606	462	WT	WT Specific
chr2	17873211	17873694	chr2	17873211	17873694	wt_k27_peak_11612	483	WT	WT Specific
chr2	18585616	18585898	chr2	18585616	18585898	wt_k27_peak_11616	282	WT	WT Specific
chr2	18590180	18590655	chr2	18590180	18590655	wt_k27_peak_11619	475	WT	WT Specific
chr2	18647189	18647775	chr2	18647189	18647775	wt_k27_peak_11622	586	WT	WT Specific
chr2	19318024	19318283	chr2	19318024	19318283	wt_k27_peak_11634	259	WT	WT Specific
chr2	19425613	19426076	chr2	19425613	19426076	wt_k27_peak_11637	463	WT	WT Specific
chr2	19427694	19428207	chr2	19427694	19428207	wt_k27_peak_11639	513	WT	WT Specific
chr2	19551298	19551700	chr2	19551298	19551700	wt_k27_peak_11647	402	WT	WT Specific
chr2	21371467	21371962	chr2	21371467	21371962	wt_k27_peak_11654	495	WT	WT Specific
chr2	22587707	22588102	chr2	22587707	22588102	wt_k27_peak_11655	395	WT	WT Specific
chr2	23053743	23054002	chr2	23053743	23054002	wt_k27_peak_11659	259	WT	WT Specific
chr2	23312185	23312456	chr2	23312185	23312456	wt_k27_peak_11661	271	WT	WT Specific
chr2	24459002	24459284	chr2	24459002	24459284	wt_k27_peak_11665	282	WT	WT Specific
chr2	24470009	24470415	chr2	24470009	24470415	wt_k27_peak_11666	406	WT	WT Specific
chr2	24938589	24939201	chr2	24938589	24939201	wt_k27_peak_11674	612	WT	WT Specific
chr2	25366400	25366669	chr2	25366400	25366669	wt_k27_peak_11696	269	WT	WT Specific
chr2	25459834	25460499	chr2	25459834	25460499	wt_k27_peak_11703	665	WT	WT Specific
chr2	25707066	25707547	chr2	25707066	25707547	wt_k27_peak_11709	481	WT	WT Specific
chr2	28622853	28623110	chr2	28622853	28623110	wt_k27_peak_11743	257	WT	WT Specific
chr2	29056990	29057604	chr2	29056990	29057604	wt_k27_peak_11754	614	WT	WT Specific
chr2	29257848	29258188	chr2	29257848	29258188	wt_k27_peak_11760	340	WT	WT Specific
chr2	29541044	29541301	chr2	29541044	29541301	wt_k27_peak_11761	257	WT	WT Specific
chr2	29583483	29583813	chr2	29583483	29583813	wt_k27_peak_11762	330	WT	WT Specific
chr2	29605985	29606254	chr2	29605985	29606254	wt_k27_peak_11763	269	WT	WT Specific
chr2	30654253	30654788	chr2	30654253	30654788	wt_k27_peak_11781	535	WT	WT Specific
chr2	30705465	30705914	chr2	30705465	30705914	wt_k27_peak_11790	449	WT	WT Specific
chr2	30853875	30854195	chr2	30853875	30854195	wt_k27_peak_11807	320	WT	WT Specific
chr2	32127026	32127352	chr2	32127026	32127352	wt_k27_peak_11839	326	WT	WT Specific
chr2	32311199	32311702	chr2	32311199	32311702	wt_k27_peak_11842	503	WT	WT Specific
chr2	32334014	32334379	chr2	32334014	32334379	wt_k27_peak_11847	365	WT	WT Specific
chr2	32533005	32533753	chr2	32533005	32533753	wt_k27_peak_11853	748	WT	WT Specific
chr2	32582205	32582547	chr2	32582205	32582547	wt_k27_peak_11856	342	WT	WT Specific
chr2	33924254	33924621	chr2	33924254	33924621	wt_k27_peak_11894	367	WT	WT Specific
chr2	34669235	34669585	chr2	34669235	34669585	wt_k27_peak_11903	350	WT	WT Specific
chr2	34962364	34963150	chr2	34962364	34963150	wt_k27_peak_11907	786	WT	WT Specific
chr2	34990437	34990871	chr2	34990437	34990871	wt_k27_peak_11909	434	WT	WT Specific
chr2	35239176	35239875	chr2	35239176	35239875	wt_k27_peak_11910	699	WT	WT Specific
chr2	35243416	35243962	chr2	35243416	35243962	wt_k27_peak_11911	546	WT	WT Specific
chr2	35576444	35576879	chr2	35576444	35576879	wt_k27_peak_11921	435	WT	WT Specific
chr2	35586640	35586936	chr2	35586640	35586936	wt_k27_peak_11924	296	WT	WT Specific
chr2	35660234	35660946	chr2	35660234	35660946	wt_k27_peak_11927	712	WT	WT Specific
chr2	35879032	35879385	chr2	35879032	35879385	wt_k27_peak_11932	353	WT	WT Specific
chr2	36195178	36195572	chr2	36195178	36195572	wt_k27_peak_11948	394	WT	WT Specific
chr2	37736342	37736599	chr2	37736342	37736599	wt_k27_peak_11954	257	WT	WT Specific
chr2	38931429	38931690	chr2	38931429	38931690	wt_k27_peak_11992	261	WT	WT Specific
chr2	39806087	39806392	chr2	39806087	39806392	wt_k27_peak_11997	305	WT	WT Specific
chr2	43724858	43725249	chr2	43724858	43725249	wt_k27_peak_11999	391	WT	WT Specific
chr2	44468439	44469016	chr2	44468439	44469016	wt_k27_peak_12000	577	WT	WT Specific
chr2	44553286	44553731	chr2	44553286	44553731	wt_k27_peak_12005	445	WT	WT Specific
chr2	45086619	45086886	chr2	45086619	45086886	wt_k27_peak_12015	267	WT	WT Specific
chr2	51555178	51555844	chr2	51555178	51555844	wt_k27_peak_12028	666	WT	WT Specific
chr2	52033955	52034809	chr2	52033955	52034809	wt_k27_peak_12032	854	WT	WT Specific
chr2	52659911	52660291	chr2	52659911	52660291	wt_k27_peak_12036	380	WT	WT Specific
chr2	52671581	52671972	chr2	52671581	52671972	wt_k27_peak_12037	391	WT	WT Specific
chr2	59470846	59471430	chr2	59470846	59471430	wt_k27_peak_12062	584	WT	WT Specific
chr2	63469647	63470015	chr2	63469647	63470015	wt_k27_peak_12087	368	WT	WT Specific
chr2	65037949	65038391	chr2	65037949	65038391	wt_k27_peak_12094	442	WT	WT Specific
chr2	68863981	68864533	chr2	68863981	68864533	wt_k27_peak_12109	552	WT	WT Specific
chr2	69365512	69365883	chr2	69365512	69365883	wt_k27_peak_12110	371	WT	WT Specific
chr2	69580292	69580559	chr2	69580292	69580559	wt_k27_peak_12112	267	WT	WT Specific
chr2	69647720	69648183	chr2	69647720	69648183	wt_k27_peak_12117	463	WT	WT Specific
chr2	70216231	70216606	chr2	70216231	70216606	wt_k27_peak_12122	375	WT	WT Specific
chr2	70342400	70342883	chr2	70342400	70342883	wt_k27_peak_12124	483	WT	WT Specific
chr2	70484328	70484741	chr2	70484328	70484741	wt_k27_peak_12131	413	WT	WT Specific
chr2	70500869	70501160	chr2	70500869	70501160	wt_k27_peak_12135	291	WT	WT Specific
chr2	70557453	70557828	chr2	70557453	70557828	wt_k27_peak_12139	375	WT	WT Specific
chr2	71446399	71447026	chr2	71446399	71447026	wt_k27_peak_12147	627	WT	WT Specific
chr2	71573301	71573744	chr2	71573301	71573744	wt_k27_peak_12151	443	WT	WT Specific
chr2	71584116	71584572	chr2	71584116	71584572	wt_k27_peak_12155	456	WT	WT Specific
chr2	71914000	71914307	chr2	71914000	71914307	wt_k27_peak_12160	307	WT	WT Specific
chr2	73549654	73550091	chr2	73549654	73550091	wt_k27_peak_12177	437	WT	WT Specific
chr2	73589324	73589765	chr2	73589324	73589765	wt_k27_peak_12179	441	WT	WT Specific
chr2	74768600	74768920	chr2	74768600	74768920	wt_k27_peak_12192	320	WT	WT Specific
chr2	74769839	74770764	chr2	74769839	74770764	wt_k27_peak_12193	925	WT	WT Specific
chr2	74963719	74964303	chr2	74963719	74964303	wt_k27_peak_12197	584	WT	WT Specific
chr2	75056420	75056695	chr2	75056420	75056695	wt_k27_peak_12199	275	WT	WT Specific
chr2	79426915	79427172	chr2	79426915	79427172	wt_k27_peak_12223	257	WT	WT Specific
chr2	79450976	79451621	chr2	79450976	79451621	wt_k27_peak_12225	645	WT	WT Specific
chr2	84194487	84194792	chr2	84194487	84194792	wt_k27_peak_12235	305	WT	WT Specific
chr2	84656507	84657145	chr2	84656507	84657145	wt_k27_peak_12236	638	WT	WT Specific
chr2	84798661	84798918	chr2	84798661	84798918	wt_k27_peak_12241	257	WT	WT Specific
chr2	84799495	84800688	chr2	84799495	84800688	wt_k27_peak_12242	1193	WT	WT Specific
chr2	84820204	84820644	chr2	84820204	84820644	wt_k27_peak_12243	440	WT	WT Specific
chr2	84893552	84893816	chr2	84893552	84893816	wt_k27_peak_12251	264	WT	WT Specific
chr2	91251187	91251732	chr2	91251187	91251732	wt_k27_peak_12276	545	WT	WT Specific
chr2	91965314	91965585	chr2	91965314	91965585	wt_k27_peak_12286	271	WT	WT Specific
chr2	92010288	92010670	chr2	92010288	92010670	wt_k27_peak_12290	382	WT	WT Specific
chr2	92049840	92050745	chr2	92049840	92050745	wt_k27_peak_12293	905	WT	WT Specific
chr2	92462846	92463122	chr2	92462846	92463122	wt_k27_peak_12304	276	WT	WT Specific
chr2	93048874	93049699	chr2	93048874	93049699	wt_k27_peak_12319	825	WT	WT Specific
chr2	93184703	93185541	chr2	93184703	93185541	wt_k27_peak_12325	838	WT	WT Specific
chr2	93330516	93331108	chr2	93330516	93331108	wt_k27_peak_12328	592	WT	WT Specific
chr2	93633883	93634226	chr2	93633883	93634226	wt_k27_peak_12333	343	WT	WT Specific
chr2	94281178	94281853	chr2	94281178	94281853	wt_k27_peak_12346	675	WT	WT Specific
chr2	94469161	94469836	chr2	94469161	94469836	wt_k27_peak_12348	675	WT	WT Specific
chr2	101676427	101676880	chr2	101676427	101676880	wt_k27_peak_12352	453	WT	WT Specific
chr2	101879276	101879701	chr2	101879276	101879701	wt_k27_peak_12356	425	WT	WT Specific
chr2	103974794	103975188	chr2	103974794	103975188	wt_k27_peak_12377	394	WT	WT Specific
chr2	104125574	104126051	chr2	104125574	104126051	wt_k27_peak_12380	477	WT	WT Specific
chr2	104127328	104128228	chr2	104127328	104128228	wt_k27_peak_12382	900	WT	WT Specific
chr2	105650239	105651214	chr2	105650239	105651214	wt_k27_peak_12411	975	WT	WT Specific
chr2	109678998	109679421	chr2	109678998	109679421	wt_k27_peak_12424	423	WT	WT Specific
chr2	109680459	109680974	chr2	109680459	109680974	wt_k27_peak_12425	515	WT	WT Specific
chr2	110363811	110364372	chr2	110363811	110364372	wt_k27_peak_12433	561	WT	WT Specific
chr2	112240484	112241481	chr2	112240484	112241481	wt_k27_peak_12435	997	WT	WT Specific
chr2	113497702	113498171	chr2	113497702	113498171	wt_k27_peak_12442	469	WT	WT Specific
chr2	113761377	113761680	chr2	113761377	113761680	wt_k27_peak_12445	303	WT	WT Specific
chr2	114205788	114206710	chr2	114205788	114206710	wt_k27_peak_12449	922	WT	WT Specific
chr2	116052247	116052597	chr2	116052247	116052597	wt_k27_peak_12455	350	WT	WT Specific
chr2	116964066	116964442	chr2	116964066	116964442	wt_k27_peak_12462	376	WT	WT Specific
chr2	117232445	117232921	chr2	117232445	117232921	wt_k27_peak_12467	476	WT	WT Specific
chr2	118203665	118204103	chr2	118203665	118204103	wt_k27_peak_12471	438	WT	WT Specific
chr2	118258189	118258548	chr2	118258189	118258548	wt_k27_peak_12472	359	WT	WT Specific
chr2	118546313	118546940	chr2	118546313	118546940	wt_k27_peak_12477	627	WT	WT Specific
chr2	118547813	118548106	chr2	118547813	118548106	wt_k27_peak_12478	293	WT	WT Specific
chr2	118685071	118685395	chr2	118685071	118685395	wt_k27_peak_12482	324	WT	WT Specific
chr2	118718429	118719359	chr2	118718429	118719359	wt_k27_peak_12487	930	WT	WT Specific
chr2	118735780	118736401	chr2	118735780	118736401	wt_k27_peak_12494	621	WT	WT Specific
chr2	118755504	118755886	chr2	118755504	118755886	wt_k27_peak_12500	382	WT	WT Specific
chr2	118776053	118776359	chr2	118776053	118776359	wt_k27_peak_12503	306	WT	WT Specific
chr2	118806701	118807200	chr2	118806701	118807200	wt_k27_peak_12513	499	WT	WT Specific
chr2	118906827	118907267	chr2	118906827	118907267	wt_k27_peak_12521	440	WT	WT Specific
chr2	118947048	118947406	chr2	118947048	118947406	wt_k27_peak_12527	358	WT	WT Specific
chr2	118980616	118981042	chr2	118980616	118981042	wt_k27_peak_12532	426	WT	WT Specific
chr2	119164711	119164972	chr2	119164711	119164972	wt_k27_peak_12534	261	WT	WT Specific
chr2	119266783	119267196	chr2	119266783	119267196	wt_k27_peak_12540	413	WT	WT Specific
chr2	119344666	119345268	chr2	119344666	119345268	wt_k27_peak_12550	602	WT	WT Specific
chr2	119345881	119346267	chr2	119345881	119346267	wt_k27_peak_12551	386	WT	WT Specific
chr2	119490298	119490685	chr2	119490298	119490685	wt_k27_peak_12557	387	WT	WT Specific
chr2	119749046	119749353	chr2	119749046	119749353	wt_k27_peak_12563	307	WT	WT Specific
chr2	121817386	121817761	chr2	121817386	121817761	wt_k27_peak_12585	375	WT	WT Specific
chr2	121865219	121865535	chr2	121865219	121865535	wt_k27_peak_12587	316	WT	WT Specific
chr2	122149979	122150769	chr2	122149979	122150769	wt_k27_peak_12590	790	WT	WT Specific
chr2	122187678	122187960	chr2	122187678	122187960	wt_k27_peak_12592	282	WT	WT Specific
chr2	122339523	122339881	chr2	122339523	122339881	wt_k27_peak_12601	358	WT	WT Specific
chr2	122379888	122380467	chr2	122379888	122380467	wt_k27_peak_12602	579	WT	WT Specific
chr2	122756729	122757018	chr2	122756729	122757018	wt_k27_peak_12609	289	WT	WT Specific
chr2	122764165	122764682	chr2	122764165	122764682	wt_k27_peak_12610	517	WT	WT Specific
chr2	124613974	124614302	chr2	124613974	124614302	wt_k27_peak_12614	328	WT	WT Specific
chr2	126882076	126882424	chr2	126882076	126882424	wt_k27_peak_12628	348	WT	WT Specific
chr2	126934122	126934753	chr2	126934122	126934753	wt_k27_peak_12629	631	WT	WT Specific
chr2	127357482	127357880	chr2	127357482	127357880	wt_k27_peak_12634	398	WT	WT Specific
chr2	127427584	127428212	chr2	127427584	127428212	wt_k27_peak_12640	628	WT	WT Specific
chr2	127428607	127428932	chr2	127428607	127428932	wt_k27_peak_12641	325	WT	WT Specific
chr2	127468596	127468890	chr2	127468596	127468890	wt_k27_peak_12643	294	WT	WT Specific
chr2	127493795	127494167	chr2	127493795	127494167	wt_k27_peak_12645	372	WT	WT Specific
chr2	127583715	127584117	chr2	127583715	127584117	wt_k27_peak_12650	402	WT	WT Specific
chr2	127905695	127906085	chr2	127905695	127906085	wt_k27_peak_12660	390	WT	WT Specific
chr2	128874560	128874888	chr2	128874560	128874888	wt_k27_peak_12670	328	WT	WT Specific
chr2	128947051	128947450	chr2	128947051	128947450	wt_k27_peak_12672	399	WT	WT Specific
chr2	129909571	129909848	chr2	129909571	129909848	wt_k27_peak_12683	277	WT	WT Specific
chr2	130422897	130423593	chr2	130422897	130423593	wt_k27_peak_12688	696	WT	WT Specific
chr2	131036024	131036565	chr2	131036024	131036565	wt_k27_peak_12694	541	WT	WT Specific
chr2	131079475	131079897	chr2	131079475	131079897	wt_k27_peak_12701	422	WT	WT Specific
chr2	131565388	131565656	chr2	131565388	131565656	wt_k27_peak_12715	268	WT	WT Specific
chr2	132160473	132160769	chr2	132160473	132160769	wt_k27_peak_12724	296	WT	WT Specific
chr2	132449183	132449598	chr2	132449183	132449598	wt_k27_peak_12727	415	WT	WT Specific
chr2	132488374	132488743	chr2	132488374	132488743	wt_k27_peak_12728	369	WT	WT Specific
chr2	136113693	136114258	chr2	136113693	136114258	wt_k27_peak_12748	565	WT	WT Specific
chr2	137101050	137101535	chr2	137101050	137101535	wt_k27_peak_12752	485	WT	WT Specific
chr2	142902383	142902706	chr2	142902383	142902706	wt_k27_peak_12761	323	WT	WT Specific
chr2	143864588	143865119	chr2	143864588	143865119	wt_k27_peak_12765	531	WT	WT Specific
chr2	144336390	144337019	chr2	144336390	144337019	wt_k27_peak_12769	629	WT	WT Specific
chr2	147304458	147305194	chr2	147304458	147305194	wt_k27_peak_12789	736	WT	WT Specific
chr2	147338430	147339101	chr2	147338430	147339101	wt_k27_peak_12792	671	WT	WT Specific
chr2	147909532	147910055	chr2	147909532	147910055	wt_k27_peak_12799	523	WT	WT Specific
chr2	147959770	147960031	chr2	147959770	147960031	wt_k27_peak_12800	261	WT	WT Specific
chr2	148060080	148060349	chr2	148060080	148060349	wt_k27_peak_12804	269	WT	WT Specific
chr2	148110689	148111157	chr2	148110689	148111157	wt_k27_peak_12805	468	WT	WT Specific
chr2	148662496	148662940	chr2	148662496	148662940	wt_k27_peak_12808	444	WT	WT Specific
chr2	148664915	148665448	chr2	148664915	148665448	wt_k27_peak_12809	533	WT	WT Specific
chr2	150685382	150685850	chr2	150685382	150685850	wt_k27_peak_12816	468	WT	WT Specific
chr2	151576842	151577246	chr2	151576842	151577246	wt_k27_peak_12823	404	WT	WT Specific
chr2	151577771	151578043	chr2	151577771	151578043	wt_k27_peak_12824	272	WT	WT Specific
chr2	151601169	151601624	chr2	151601169	151601624	wt_k27_peak_12825	455	WT	WT Specific
chr2	151642928	151643303	chr2	151642928	151643303	wt_k27_peak_12827	375	WT	WT Specific
chr2	151790426	151790700	chr2	151790426	151790700	wt_k27_peak_12836	274	WT	WT Specific
chr2	151997558	151998060	chr2	151997558	151998060	wt_k27_peak_12842	502	WT	WT Specific
chr2	152103763	152104323	chr2	152103763	152104323	wt_k27_peak_12858	560	WT	WT Specific
chr2	152719097	152719433	chr2	152719097	152719433	wt_k27_peak_12868	336	WT	WT Specific
chr2	152918812	152919360	chr2	152918812	152919360	wt_k27_peak_12878	548	WT	WT Specific
chr2	152930046	152930602	chr2	152930046	152930602	wt_k27_peak_12879	556	WT	WT Specific
chr2	153059333	153059636	chr2	153059333	153059636	wt_k27_peak_12891	303	WT	WT Specific
chr2	153520863	153521396	chr2	153520863	153521396	wt_k27_peak_12903	533	WT	WT Specific
chr2	154931864	154932333	chr2	154931864	154932333	wt_k27_peak_12917	469	WT	WT Specific
chr2	155477131	155477398	chr2	155477131	155477398	wt_k27_peak_12924	267	WT	WT Specific
chr2	155612101	155612780	chr2	155612101	155612780	wt_k27_peak_12927	679	WT	WT Specific
chr2	155949536	155949876	chr2	155949536	155949876	wt_k27_peak_12940	340	WT	WT Specific
chr2	155953034	155953663	chr2	155953034	155953663	wt_k27_peak_12941	629	WT	WT Specific
chr2	156482873	156483349	chr2	156482873	156483349	wt_k27_peak_12952	476	WT	WT Specific
chr2	157240605	157240941	chr2	157240605	157240941	wt_k27_peak_12965	336	WT	WT Specific
chr2	157258524	157258792	chr2	157258524	157258792	wt_k27_peak_12972	268	WT	WT Specific
chr2	157529938	157530344	chr2	157529938	157530344	wt_k27_peak_12978	406	WT	WT Specific
chr2	157605551	157605821	chr2	157605551	157605821	wt_k27_peak_12981	270	WT	WT Specific
chr2	158143033	158143329	chr2	158143033	158143329	wt_k27_peak_12991	296	WT	WT Specific
chr2	158599501	158599796	chr2	158599501	158599796	wt_k27_peak_13003	295	WT	WT Specific
chr2	158620813	158621198	chr2	158620813	158621198	wt_k27_peak_13006	385	WT	WT Specific
chr2	159064448	159064861	chr2	159064448	159064861	wt_k27_peak_13010	413	WT	WT Specific
chr2	160390942	160391200	chr2	160390942	160391200	wt_k27_peak_13018	258	WT	WT Specific
chr2	160503528	160503964	chr2	160503528	160503964	wt_k27_peak_13020	436	WT	WT Specific
chr2	160916269	160916528	chr2	160916269	160916528	wt_k27_peak_13027	259	WT	WT Specific
chr2	160920671	160920968	chr2	160920671	160920968	wt_k27_peak_13028	297	WT	WT Specific
chr2	161194158	161195108	chr2	161194158	161195108	wt_k27_peak_13032	950	WT	WT Specific
chr2	162988304	162988606	chr2	162988304	162988606	wt_k27_peak_13039	302	WT	WT Specific
chr2	164191065	164191349	chr2	164191065	164191349	wt_k27_peak_13059	284	WT	WT Specific
chr2	164429271	164429602	chr2	164429271	164429602	wt_k27_peak_13068	331	WT	WT Specific
chr2	164927731	164928147	chr2	164927731	164928147	wt_k27_peak_13080	416	WT	WT Specific
chr2	165117800	165118372	chr2	165117800	165118372	wt_k27_peak_13103	572	WT	WT Specific
chr2	165363813	165364173	chr2	165363813	165364173	wt_k27_peak_13127	360	WT	WT Specific
chr2	165601268	165601786	chr2	165601268	165601786	wt_k27_peak_13144	518	WT	WT Specific
chr2	165774104	165774486	chr2	165774104	165774486	wt_k27_peak_13146	382	WT	WT Specific
chr2	165776371	165776847	chr2	165776371	165776847	wt_k27_peak_13147	476	WT	WT Specific
chr2	165917905	165918170	chr2	165917905	165918170	wt_k27_peak_13155	265	WT	WT Specific
chr2	165919765	165920037	chr2	165919765	165920037	wt_k27_peak_13156	272	WT	WT Specific
chr2	165954433	165955370	chr2	165954433	165955370	wt_k27_peak_13157	937	WT	WT Specific
chr2	166218777	166219368	chr2	166218777	166219368	wt_k27_peak_13160	591	WT	WT Specific
chr2	166355933	166356215	chr2	166355933	166356215	wt_k27_peak_13163	282	WT	WT Specific
chr2	166593746	166594003	chr2	166593746	166594003	wt_k27_peak_13165	257	WT	WT Specific
chr2	167690458	167690718	chr2	167690458	167690718	wt_k27_peak_13200	260	WT	WT Specific
chr2	168605118	168605492	chr2	168605118	168605492	wt_k27_peak_13229	374	WT	WT Specific
chr2	168840948	168841528	chr2	168840948	168841528	wt_k27_peak_13232	580	WT	WT Specific
chr2	168845491	168845878	chr2	168845491	168845878	wt_k27_peak_13233	387	WT	WT Specific
chr2	168999025	168999356	chr2	168999025	168999356	wt_k27_peak_13239	331	WT	WT Specific
chr2	169061922	169062194	chr2	169061922	169062194	wt_k27_peak_13242	272	WT	WT Specific
chr2	170288755	170289095	chr2	170288755	170289095	wt_k27_peak_13259	340	WT	WT Specific
chr2	170406432	170407370	chr2	170406432	170407370	wt_k27_peak_13267	938	WT	WT Specific
chr2	172225814	172226072	chr2	172225814	172226072	wt_k27_peak_13285	258	WT	WT Specific
chr2	172240025	172240446	chr2	172240025	172240446	wt_k27_peak_13286	421	WT	WT Specific
chr2	172283853	172284148	chr2	172283853	172284148	wt_k27_peak_13289	295	WT	WT Specific
chr2	172328368	172328973	chr2	172328368	172328973	wt_k27_peak_13290	605	WT	WT Specific
chr2	172514578	172514862	chr2	172514578	172514862	wt_k27_peak_13293	284	WT	WT Specific
chr2	172781185	172781576	chr2	172781185	172781576	wt_k27_peak_13311	391	WT	WT Specific
chr2	172987013	172987313	chr2	172987013	172987313	wt_k27_peak_13325	300	WT	WT Specific
chr2	173163529	173163787	chr2	173163529	173163787	wt_k27_peak_13331	258	WT	WT Specific
chr2	173302854	173303157	chr2	173302854	173303157	wt_k27_peak_13336	303	WT	WT Specific
chr2	174852675	174853145	chr2	174852675	174853145	wt_k27_peak_13361	470	WT	WT Specific
chr2	174902136	174902436	chr2	174902136	174902436	wt_k27_peak_13363	300	WT	WT Specific
chr2	174937159	174937456	chr2	174937159	174937456	wt_k27_peak_13364	297	WT	WT Specific
chr2	178141161	178141457	chr2	178141161	178141457	wt_k27_peak_13367	296	WT	WT Specific
chr2	180349265	180349541	chr2	180349265	180349541	wt_k27_peak_13392	276	WT	WT Specific
chr2	180370892	180371292	chr2	180370892	180371292	wt_k27_peak_13393	400	WT	WT Specific
chr2	180779906	180780312	chr2	180779906	180780312	wt_k27_peak_13416	406	WT	WT Specific
chr2	180827898	180828165	chr2	180827898	180828165	wt_k27_peak_13420	267	WT	WT Specific
chr2	181132231	181132545	chr2	181132231	181132545	wt_k27_peak_13424	314	WT	WT Specific
chr2	181303921	181304371	chr2	181303921	181304371	wt_k27_peak_13437	450	WT	WT Specific
chr2	181675038	181675459	chr2	181675038	181675459	wt_k27_peak_13447	421	WT	WT Specific
chr3	3146269	3147042	chr3	3146269	3147042	wt_k27_peak_13452	773	WT	WT Specific
chr3	3503624	3503925	chr3	3503624	3503925	wt_k27_peak_13454	301	WT	WT Specific
chr3	3506134	3506445	chr3	3506134	3506445	wt_k27_peak_13455	311	WT	WT Specific
chr3	8593788	8594080	chr3	8593788	8594080	wt_k27_peak_13468	292	WT	WT Specific
chr3	8712932	8713254	chr3	8712932	8713254	wt_k27_peak_13477	322	WT	WT Specific
chr3	9235280	9235628	chr3	9235280	9235628	wt_k27_peak_13486	348	WT	WT Specific
chr3	9863113	9863770	chr3	9863113	9863770	wt_k27_peak_13503	657	WT	WT Specific
chr3	14575799	14576272	chr3	14575799	14576272	wt_k27_peak_13509	473	WT	WT Specific
chr3	17272511	17272772	chr3	17272511	17272772	wt_k27_peak_13515	261	WT	WT Specific
chr3	17320029	17320343	chr3	17320029	17320343	wt_k27_peak_13516	314	WT	WT Specific
chr3	17643614	17643926	chr3	17643614	17643926	wt_k27_peak_13517	312	WT	WT Specific
chr3	17778933	17779614	chr3	17778933	17779614	wt_k27_peak_13518	681	WT	WT Specific
chr3	18060201	18060696	chr3	18060201	18060696	wt_k27_peak_13523	495	WT	WT Specific
chr3	19170741	19171663	chr3	19170741	19171663	wt_k27_peak_13524	922	WT	WT Specific
chr3	19178109	19178446	chr3	19178109	19178446	wt_k27_peak_13525	337	WT	WT Specific
chr3	27713377	27713876	chr3	27713377	27713876	wt_k27_peak_13540	499	WT	WT Specific
chr3	30651015	30651438	chr3	30651015	30651438	wt_k27_peak_13561	423	WT	WT Specific
chr3	30856600	30857134	chr3	30856600	30857134	wt_k27_peak_13564	534	WT	WT Specific
chr3	32389972	32390276	chr3	32389972	32390276	wt_k27_peak_13572	304	WT	WT Specific
chr3	34664744	34665074	chr3	34664744	34665074	wt_k27_peak_13587	330	WT	WT Specific
chr3	34691276	34691597	chr3	34691276	34691597	wt_k27_peak_13589	321	WT	WT Specific
chr3	36044271	36044653	chr3	36044271	36044653	wt_k27_peak_13595	382	WT	WT Specific
chr3	36058135	36058664	chr3	36058135	36058664	wt_k27_peak_13596	529	WT	WT Specific
chr3	36218023	36218416	chr3	36218023	36218416	wt_k27_peak_13601	393	WT	WT Specific
chr3	36473438	36473846	chr3	36473438	36473846	wt_k27_peak_13606	408	WT	WT Specific
chr3	36524338	36525042	chr3	36524338	36525042	wt_k27_peak_13612	704	WT	WT Specific
chr3	36540727	36541078	chr3	36540727	36541078	wt_k27_peak_13614	351	WT	WT Specific
chr3	36694706	36694963	chr3	36694706	36694963	wt_k27_peak_13621	257	WT	WT Specific
chr3	37059041	37059640	chr3	37059041	37059640	wt_k27_peak_13623	599	WT	WT Specific
chr3	37344119	37344472	chr3	37344119	37344472	wt_k27_peak_13627	353	WT	WT Specific
chr3	37359230	37359623	chr3	37359230	37359623	wt_k27_peak_13629	393	WT	WT Specific
chr3	37360067	37360773	chr3	37360067	37360773	wt_k27_peak_13630	706	WT	WT Specific
chr3	37687529	37688043	chr3	37687529	37688043	wt_k27_peak_13635	514	WT	WT Specific
chr3	38500994	38501411	chr3	38500994	38501411	wt_k27_peak_13646	417	WT	WT Specific
chr3	40682884	40683535	chr3	40682884	40683535	wt_k27_peak_13652	651	WT	WT Specific
chr3	45372688	45373115	chr3	45372688	45373115	wt_k27_peak_13663	427	WT	WT Specific
chr3	45685572	45685883	chr3	45685572	45685883	wt_k27_peak_13670	311	WT	WT Specific
chr3	45687628	45688026	chr3	45687628	45688026	wt_k27_peak_13671	398	WT	WT Specific
chr3	50381987	50382894	chr3	50381987	50382894	wt_k27_peak_13674	907	WT	WT Specific
chr3	50695291	50695571	chr3	50695291	50695571	wt_k27_peak_13675	280	WT	WT Specific
chr3	51173885	51174419	chr3	51173885	51174419	wt_k27_peak_13682	534	WT	WT Specific
chr3	51333115	51333799	chr3	51333115	51333799	wt_k27_peak_13684	684	WT	WT Specific
chr3	51358935	51359194	chr3	51358935	51359194	wt_k27_peak_13687	259	WT	WT Specific
chr3	51702758	51703768	chr3	51702758	51703768	wt_k27_peak_13696	1010	WT	WT Specific
chr3	52046244	52046889	chr3	52046244	52046889	wt_k27_peak_13702	645	WT	WT Specific
chr3	52068216	52068502	chr3	52068216	52068502	wt_k27_peak_13704	286	WT	WT Specific
chr3	53642086	53642343	chr3	53642086	53642343	wt_k27_peak_13730	257	WT	WT Specific
chr3	53730682	53731021	chr3	53730682	53731021	wt_k27_peak_13737	339	WT	WT Specific
chr3	53873131	53873497	chr3	53873131	53873497	wt_k27_peak_13741	366	WT	WT Specific
chr3	55777359	55777616	chr3	55777359	55777616	wt_k27_peak_13764	257	WT	WT Specific
chr3	57578454	57578773	chr3	57578454	57578773	wt_k27_peak_13769	319	WT	WT Specific
chr3	59343158	59343552	chr3	59343158	59343552	wt_k27_peak_13778	394	WT	WT Specific
chr3	62193149	62193665	chr3	62193149	62193665	wt_k27_peak_13783	516	WT	WT Specific
chr3	67518428	67518874	chr3	67518428	67518874	wt_k27_peak_13804	446	WT	WT Specific
chr3	67575710	67575967	chr3	67575710	67575967	wt_k27_peak_13806	257	WT	WT Specific
chr3	68865911	68866445	chr3	68865911	68866445	wt_k27_peak_13811	534	WT	WT Specific
chr3	69129276	69130068	chr3	69129276	69130068	wt_k27_peak_13813	792	WT	WT Specific
chr3	69863355	69863711	chr3	69863355	69863711	wt_k27_peak_13817	356	WT	WT Specific
chr3	69882186	69882522	chr3	69882186	69882522	wt_k27_peak_13818	336	WT	WT Specific
chr3	73049856	73050234	chr3	73049856	73050234	wt_k27_peak_13822	378	WT	WT Specific
chr3	76075475	76076035	chr3	76075475	76076035	wt_k27_peak_13832	560	WT	WT Specific
chr3	79846771	79847329	chr3	79846771	79847329	wt_k27_peak_13841	558	WT	WT Specific
chr3	82077420	82077791	chr3	82077420	82077791	wt_k27_peak_13848	371	WT	WT Specific
chr3	83033925	83034275	chr3	83033925	83034275	wt_k27_peak_13856	350	WT	WT Specific
chr3	84040968	84041496	chr3	84040968	84041496	wt_k27_peak_13867	528	WT	WT Specific
chr3	84585866	84586224	chr3	84585866	84586224	wt_k27_peak_13879	358	WT	WT Specific
chr3	84730418	84731205	chr3	84730418	84731205	wt_k27_peak_13881	787	WT	WT Specific
chr3	86219086	86219438	chr3	86219086	86219438	wt_k27_peak_13890	352	WT	WT Specific
chr3	87236801	87237314	chr3	87236801	87237314	wt_k27_peak_13902	513	WT	WT Specific
chr3	87521604	87521994	chr3	87521604	87521994	wt_k27_peak_13906	390	WT	WT Specific
chr3	87775305	87776092	chr3	87775305	87776092	wt_k27_peak_13917	787	WT	WT Specific
chr3	87965263	87965601	chr3	87965263	87965601	wt_k27_peak_13934	338	WT	WT Specific
chr3	88017860	88018513	chr3	88017860	88018513	wt_k27_peak_13939	653	WT	WT Specific
chr3	88142613	88142924	chr3	88142613	88142924	wt_k27_peak_13947	311	WT	WT Specific
chr3	89156981	89157809	chr3	89156981	89157809	wt_k27_peak_13977	828	WT	WT Specific
chr3	89301518	89301863	chr3	89301518	89301863	wt_k27_peak_13990	345	WT	WT Specific
chr3	89330077	89330508	chr3	89330077	89330508	wt_k27_peak_13994	431	WT	WT Specific
chr3	89333768	89334025	chr3	89333768	89334025	wt_k27_peak_13995	257	WT	WT Specific
chr3	89380159	89380918	chr3	89380159	89380918	wt_k27_peak_13999	759	WT	WT Specific
chr3	89510477	89510797	chr3	89510477	89510797	wt_k27_peak_14005	320	WT	WT Specific
chr3	89597723	89598313	chr3	89597723	89598313	wt_k27_peak_14010	590	WT	WT Specific
chr3	90230655	90231031	chr3	90230655	90231031	wt_k27_peak_14019	376	WT	WT Specific
chr3	92034381	92034733	chr3	92034381	92034733	wt_k27_peak_14025	352	WT	WT Specific
chr3	92571636	92572497	chr3	92571636	92572497	wt_k27_peak_14027	861	WT	WT Specific
chr3	93124508	93124880	chr3	93124508	93124880	wt_k27_peak_14030	372	WT	WT Specific
chr3	93450565	93450961	chr3	93450565	93450961	wt_k27_peak_14033	396	WT	WT Specific
chr3	93471189	93471832	chr3	93471189	93471832	wt_k27_peak_14034	643	WT	WT Specific
chr3	93493086	93493585	chr3	93493086	93493585	wt_k27_peak_14035	499	WT	WT Specific
chr3	94605024	94605310	chr3	94605024	94605310	wt_k27_peak_14050	286	WT	WT Specific
chr3	94894075	94894431	chr3	94894075	94894431	wt_k27_peak_14053	356	WT	WT Specific
chr3	95411425	95412327	chr3	95411425	95412327	wt_k27_peak_14060	902	WT	WT Specific
chr3	95909054	95909396	chr3	95909054	95909396	wt_k27_peak_14068	342	WT	WT Specific
chr3	95916901	95917626	chr3	95916901	95917626	wt_k27_peak_14069	725	WT	WT Specific
chr3	95965106	95965445	chr3	95965106	95965445	wt_k27_peak_14071	339	WT	WT Specific
chr3	96050064	96050448	chr3	96050064	96050448	wt_k27_peak_14082	384	WT	WT Specific
chr3	96537157	96537514	chr3	96537157	96537514	wt_k27_peak_14103	357	WT	WT Specific
chr3	97715022	97715341	chr3	97715022	97715341	wt_k27_peak_14123	319	WT	WT Specific
chr3	97826744	97827261	chr3	97826744	97827261	wt_k27_peak_14128	517	WT	WT Specific
chr3	98385323	98385582	chr3	98385323	98385582	wt_k27_peak_14140	259	WT	WT Specific
chr3	99232585	99232991	chr3	99232585	99232991	wt_k27_peak_14142	406	WT	WT Specific
chr3	101608351	101608707	chr3	101608351	101608707	wt_k27_peak_14154	356	WT	WT Specific
chr3	101613758	101614083	chr3	101613758	101614083	wt_k27_peak_14155	325	WT	WT Specific
chr3	101859280	101859719	chr3	101859280	101859719	wt_k27_peak_14156	439	WT	WT Specific
chr3	102024136	102024417	chr3	102024136	102024417	wt_k27_peak_14160	281	WT	WT Specific
chr3	102223648	102224082	chr3	102223648	102224082	wt_k27_peak_14168	434	WT	WT Specific
chr3	102579625	102580409	chr3	102579625	102580409	wt_k27_peak_14171	784	WT	WT Specific
chr3	102606810	102607354	chr3	102606810	102607354	wt_k27_peak_14172	544	WT	WT Specific
chr3	102941431	102941700	chr3	102941431	102941700	wt_k27_peak_14179	269	WT	WT Specific
chr3	103091167	103091424	chr3	103091167	103091424	wt_k27_peak_14182	257	WT	WT Specific
chr3	103568305	103568614	chr3	103568305	103568614	wt_k27_peak_14184	309	WT	WT Specific
chr3	104968689	104969210	chr3	104968689	104969210	wt_k27_peak_14205	521	WT	WT Specific
chr3	105150806	105151563	chr3	105150806	105151563	wt_k27_peak_14208	757	WT	WT Specific
chr3	105483341	105483720	chr3	105483341	105483720	wt_k27_peak_14211	379	WT	WT Specific
chr3	105521560	105521970	chr3	105521560	105521970	wt_k27_peak_14213	410	WT	WT Specific
chr3	106484292	106485026	chr3	106484292	106485026	wt_k27_peak_14227	734	WT	WT Specific
chr3	107028558	107029023	chr3	107028558	107029023	wt_k27_peak_14228	465	WT	WT Specific
chr3	107031618	107032328	chr3	107031618	107032328	wt_k27_peak_14229	710	WT	WT Specific
chr3	107342580	107342977	chr3	107342580	107342977	wt_k27_peak_14235	397	WT	WT Specific
chr3	107444392	107444737	chr3	107444392	107444737	wt_k27_peak_14237	345	WT	WT Specific
chr3	107513216	107513648	chr3	107513216	107513648	wt_k27_peak_14241	432	WT	WT Specific
chr3	107514396	107514705	chr3	107514396	107514705	wt_k27_peak_14242	309	WT	WT Specific
chr3	107577901	107578199	chr3	107577901	107578199	wt_k27_peak_14245	298	WT	WT Specific
chr3	107756257	107756657	chr3	107756257	107756657	wt_k27_peak_14252	400	WT	WT Specific
chr3	107829273	107829541	chr3	107829273	107829541	wt_k27_peak_14258	268	WT	WT Specific
chr3	107905100	107905646	chr3	107905100	107905646	wt_k27_peak_14262	546	WT	WT Specific
chr3	107906015	107906750	chr3	107906015	107906750	wt_k27_peak_14263	735	WT	WT Specific
chr3	107916481	107916790	chr3	107916481	107916790	wt_k27_peak_14264	309	WT	WT Specific
chr3	108240900	108241387	chr3	108240900	108241387	wt_k27_peak_14274	487	WT	WT Specific
chr3	108391646	108391909	chr3	108391646	108391909	wt_k27_peak_14276	263	WT	WT Specific
chr3	108396341	108396858	chr3	108396341	108396858	wt_k27_peak_14278	517	WT	WT Specific
chr3	108859182	108859606	chr3	108859182	108859606	wt_k27_peak_14290	424	WT	WT Specific
chr3	108880746	108881577	chr3	108880746	108881577	wt_k27_peak_14291	831	WT	WT Specific
chr3	114028135	114028509	chr3	114028135	114028509	wt_k27_peak_14301	374	WT	WT Specific
chr3	116256204	116256735	chr3	116256204	116256735	wt_k27_peak_14307	531	WT	WT Specific
chr3	116714680	116715032	chr3	116714680	116715032	wt_k27_peak_14315	352	WT	WT Specific
chr3	121531532	121531998	chr3	121531532	121531998	wt_k27_peak_14330	466	WT	WT Specific
chr3	123117316	123117708	chr3	123117316	123117708	wt_k27_peak_14348	392	WT	WT Specific
chr3	123172206	123172541	chr3	123172206	123172541	wt_k27_peak_14349	335	WT	WT Specific
chr3	126362353	126362779	chr3	126362353	126362779	wt_k27_peak_14362	426	WT	WT Specific
chr3	129253772	129254084	chr3	129253772	129254084	wt_k27_peak_14384	312	WT	WT Specific
chr3	130183321	130183708	chr3	130183321	130183708	wt_k27_peak_14393	387	WT	WT Specific
chr3	131303971	131304493	chr3	131303971	131304493	wt_k27_peak_14405	522	WT	WT Specific
chr3	134243663	134244164	chr3	134243663	134244164	wt_k27_peak_14413	501	WT	WT Specific
chr3	137535073	137535363	chr3	137535073	137535363	wt_k27_peak_14426	290	WT	WT Specific
chr3	137557521	137557863	chr3	137557521	137557863	wt_k27_peak_14430	342	WT	WT Specific
chr3	139202203	139202460	chr3	139202203	139202460	wt_k27_peak_14449	257	WT	WT Specific
chr3	141820509	141820897	chr3	141820509	141820897	wt_k27_peak_14451	388	WT	WT Specific
chr3	141821690	141822091	chr3	141821690	141822091	wt_k27_peak_14452	401	WT	WT Specific
chr3	142531215	142531789	chr3	142531215	142531789	wt_k27_peak_14456	574	WT	WT Specific
chr3	145703719	145704318	chr3	145703719	145704318	wt_k27_peak_14483	599	WT	WT Specific
chr3	145950480	145950841	chr3	145950480	145950841	wt_k27_peak_14486	361	WT	WT Specific
chr3	146945145	146945516	chr3	146945145	146945516	wt_k27_peak_14509	371	WT	WT Specific
chr3	149083763	149084059	chr3	149083763	149084059	wt_k27_peak_14514	296	WT	WT Specific
chr3	149113191	149113448	chr3	149113191	149113448	wt_k27_peak_14517	257	WT	WT Specific
chr3	149274986	149275750	chr3	149274986	149275750	wt_k27_peak_14520	764	WT	WT Specific
chr3	149333553	149334114	chr3	149333553	149334114	wt_k27_peak_14521	561	WT	WT Specific
chr3	151437363	151437709	chr3	151437363	151437709	wt_k27_peak_14523	346	WT	WT Specific
chr3	152192816	152193502	chr3	152192816	152193502	wt_k27_peak_14534	686	WT	WT Specific
chr3	154323026	154323283	chr3	154323026	154323283	wt_k27_peak_14546	257	WT	WT Specific
chr4	8916271	8916613	chr4	8916271	8916613	wt_k27_peak_14583	342	WT	WT Specific
chr4	8917255	8917595	chr4	8917255	8917595	wt_k27_peak_14584	340	WT	WT Specific
chr4	9136207	9136831	chr4	9136207	9136831	wt_k27_peak_14589	624	WT	WT Specific
chr4	9875447	9875805	chr4	9875447	9875805	wt_k27_peak_14598	358	WT	WT Specific
chr4	12172288	12172639	chr4	12172288	12172639	wt_k27_peak_14605	351	WT	WT Specific
chr4	14544083	14544410	chr4	14544083	14544410	wt_k27_peak_14615	327	WT	WT Specific
chr4	14834388	14835403	chr4	14834388	14835403	wt_k27_peak_14616	1015	WT	WT Specific
chr4	15948158	15948743	chr4	15948158	15948743	wt_k27_peak_14622	585	WT	WT Specific
chr4	19568831	19569543	chr4	19568831	19569543	wt_k27_peak_14627	712	WT	WT Specific
chr4	19572519	19572867	chr4	19572519	19572867	wt_k27_peak_14629	348	WT	WT Specific
chr4	19574275	19574735	chr4	19574275	19574735	wt_k27_peak_14630	460	WT	WT Specific
chr4	20775456	20775792	chr4	20775456	20775792	wt_k27_peak_14634	336	WT	WT Specific
chr4	21704254	21704915	chr4	21704254	21704915	wt_k27_peak_14639	661	WT	WT Specific
chr4	22152133	22152669	chr4	22152133	22152669	wt_k27_peak_14644	536	WT	WT Specific
chr4	22504313	22505283	chr4	22504313	22505283	wt_k27_peak_14646	970	WT	WT Specific
chr4	28806863	28807191	chr4	28806863	28807191	wt_k27_peak_14650	328	WT	WT Specific
chr4	31921953	31922385	chr4	31921953	31922385	wt_k27_peak_14656	432	WT	WT Specific
chr4	32059617	32060001	chr4	32059617	32060001	wt_k27_peak_14660	384	WT	WT Specific
chr4	32076239	32076504	chr4	32076239	32076504	wt_k27_peak_14662	265	WT	WT Specific
chr4	32602896	32603425	chr4	32602896	32603425	wt_k27_peak_14669	529	WT	WT Specific
chr4	33190189	33190925	chr4	33190189	33190925	wt_k27_peak_14677	736	WT	WT Specific
chr4	33588023	33588633	chr4	33588023	33588633	wt_k27_peak_14681	610	WT	WT Specific
chr4	33778069	33778341	chr4	33778069	33778341	wt_k27_peak_14683	272	WT	WT Specific
chr4	33918881	33919149	chr4	33918881	33919149	wt_k27_peak_14684	268	WT	WT Specific
chr4	40221884	40222141	chr4	40221884	40222141	wt_k27_peak_14701	257	WT	WT Specific
chr4	41072770	41073027	chr4	41072770	41073027	wt_k27_peak_14708	257	WT	WT Specific
chr4	41694232	41694799	chr4	41694232	41694799	wt_k27_peak_14728	567	WT	WT Specific
chr4	41734661	41734952	chr4	41734661	41734952	wt_k27_peak_14734	291	WT	WT Specific
chr4	43038729	43039473	chr4	43038729	43039473	wt_k27_peak_14740	744	WT	WT Specific
chr4	43372533	43373203	chr4	43372533	43373203	wt_k27_peak_14743	670	WT	WT Specific
chr4	43416407	43416707	chr4	43416407	43416707	wt_k27_peak_14745	300	WT	WT Specific
chr4	43461883	43462232	chr4	43461883	43462232	wt_k27_peak_14751	349	WT	WT Specific
chr4	45598882	45599265	chr4	45598882	45599265	wt_k27_peak_14799	383	WT	WT Specific
chr4	45645208	45645484	chr4	45645208	45645484	wt_k27_peak_14802	276	WT	WT Specific
chr4	45767474	45768141	chr4	45767474	45768141	wt_k27_peak_14813	667	WT	WT Specific
chr4	45981182	45981439	chr4	45981182	45981439	wt_k27_peak_14820	257	WT	WT Specific
chr4	46352985	46353242	chr4	46352985	46353242	wt_k27_peak_14829	257	WT	WT Specific
chr4	46651670	46652173	chr4	46651670	46652173	wt_k27_peak_14842	503	WT	WT Specific
chr4	47722170	47722474	chr4	47722170	47722474	wt_k27_peak_14856	304	WT	WT Specific
chr4	48273138	48273451	chr4	48273138	48273451	wt_k27_peak_14871	313	WT	WT Specific
chr4	49594239	49594908	chr4	49594239	49594908	wt_k27_peak_14875	669	WT	WT Specific
chr4	53777845	53778141	chr4	53777845	53778141	wt_k27_peak_14889	296	WT	WT Specific
chr4	53781511	53781780	chr4	53781511	53781780	wt_k27_peak_14891	269	WT	WT Specific
chr4	53883302	53883693	chr4	53883302	53883693	wt_k27_peak_14892	391	WT	WT Specific
chr4	53884144	53884401	chr4	53884144	53884401	wt_k27_peak_14893	257	WT	WT Specific
chr4	55644160	55644676	chr4	55644160	55644676	wt_k27_peak_14902	516	WT	WT Specific
[truncated: 85,645 more rows]

## Sheet: sheet_legends
h3k27me3_peak_locations
Column	Description
A	UnionChr, peak chromosome
B	UnionStart, chromosomal position of peak start
C	UnionEnd, chromosomal position of peak end
D	IntersectChr, dataset chromosome
E	IntersectStart, dataset chromosomal position of peak start
F	IntersectEnd, dataset chromosomal position of peak start
G	IntersectName, peak/intersect name
H	Overlap, length of hek27me3 peak
I	Genotype, which dataset (WT/DKO) the peak came from
J	PeakType, classification of whether peak is found in WT cell, DKO cells, or both (shared)
