# Supplementary material
Source: HighWire-hosted journal article supplement (doi:10.1101/rna.079569.122)
Supplement: Supplemental_Table_S9.xlsx [file Supplemental_Table_S9.xlsx]

## Sheet: Legend
All Chr6 Genes		Chr6 Xist Silenced Genes
Column	Description	Column	Description
A	gene id	A	gene id
B	gene name	B	gene name
C	chr; chromosome of gene	C	chr; chromosome of gene
D	gene start	D	gene start
E	gene end	E	gene end
F	gene strand	F	gene strand
G	empty1_RNAseq_B6_total reads	G	empty1_B6_total reads
H	empty1_RNAseq_cast_total reads	H	empty1_cast_total reads
I	empty2_RNAseq_B6_total reads	I	empty2_B6_total reads
J	empty2_RNAseq_cast_total reads	J	empty2_cast_total reads
K	empty3_RNAseq_B6_total reads	K	empty3_B6_total reads
L	empty3_RNAseq_cast_total reads	L	empty3_cast_total reads
M	empty4_RNAseq_B6_total reads	M	empty4_B6_total reads
N	empty4_RNAseq_cast_total reads	N	empty4_cast_total reads
O	parent_B6_total reads	O	parent_B6_total reads
P	parent_cast_total reads	P	parent_cast_total reads
Q	wt20_B6_total reads	Q	wt20_B6_total reads
R	wt20_cast_total reads	R	wt20_cast_total reads
S	wt44_B6_total reads	S	wt44_B6_total reads
T	wt44_cast_total reads	T	wt44_cast_total reads
U	dko13_B6_total reads	U	dko13_B6_total reads
V	dko13_cast_total reads	V	dko13_cast_total reads
W	dko4_B6_total reads	W	dko4_B6_total reads
X	dko4_cast_total reads	X	dko4_cast_total reads
Y	dko13-egfp-rep1_b6_total reads	Y	dko13-egfp-rep1_B6_total reads
Z	dko13-egfp-rep1_cast_total reads	Z	dko13-egfp-rep1_cast_total reads
AA	dko13-egfp-rep2_b6_total reads	AA	dko13-egfp-rep2_B6_total reads
AB	dko13-egfp-rep2_cast_total reads	AB	dko13-egfp-rep2_cast_total reads
AC	dko13-fl-safb-rep1_b6_total reads	AC	dko13-fl-safb-rep1_B6_total reads
AD	dko13-fl-safb-rep1_cast_total reads	AD	dko13-fl-safb-rep1_cast_total reads
AE	dko13-fl-safb-rep2_b6_total reads	AE	dko13-fl-safb-rep2_B6_total reads
AF	dko13-fl-safb-rep2_cast_total reads	AF	dko13-fl-safb-rep2_cast_total reads
AG	dko13-safb-dd3∆-rep1_b6_total reads	AG	dko13-safb-dd3∆-rep1_B6_total reads
AH	dko13-safb-dd3∆-rep1_cast_total reads	AH	dko13-safb-dd3∆-rep1_cast_total reads
AI	dko13-safb-dd3∆-rep2_b6_total reads	AI	dko13-safb-dd3∆-rep2_B6_total reads
AJ	dko13-safb-dd3∆-rep2_cast_total reads	AJ	dko13-safb-dd3∆-rep2_cast_total reads
		AK	empty1_B6_total RPM (reads per million)
		AL	empty1_cast_total RPM (reads per million)
		AM	empty2_B6_total RPM (reads per million)
		AN	empty2_cast_total RPM (reads per million)
		AO	empty3_B6_total RPM (reads per million)
		AP	empty3_cast_total RPM (reads per million)
		AQ	empty4_B6_total RPM (reads per million)
		AR	empty4_cast_total RPM (reads per million)
		AS	parent_B6_total RPM (reads per million)
		AT	parent_cast_total RPM (reads per million)
		AU	wt20_B6_total RPM (reads per million)
		AV	wt20_cast_total RPM (reads per million)
		AW	wt44_B6_total RPM (reads per million)
		AX	wt44_cast_total RPM (reads per million)
		AY	dko13_B6_total RPM (reads per million)
		AZ	dko13_cast_total RPM (reads per million)
		BA	dko4_B6_total RPM (reads per million)
		BB	dko4_cast_total RPM (reads per million)
		BC	dko13-egfp-rep1_B6_total RPM (reads per million)
		BD	dko13-egfp-rep1_cast_total RPM (reads per million)
		BE	dko13-egfp-rep2_B6_total RPM (reads per million)
		BF	dko13-egfp-rep2_cast_total RPM (reads per million)
		BG	dko13-fl-safb-rep1_B6_total RPM (reads per million)
		BH	dko13-fl-safb-rep1_cast_total RPM (reads per million)
		BI	dko13-fl-safb-rep2_B6_total RPM (reads per million)
		BJ	dko13-fl-safb-rep2_cast_total RPM (reads per million)
		BK	dko13-safb-dd3∆-rep1_B6_total RPM (reads per million)
		BL	dko13-safb-dd3∆-rep1_cast_total RPM (reads per million)
		BM	dko13-safb-dd3∆-rep2_B6_total RPM (reads per million)
		BN	dko13-safb-dd3∆-rep2_cast_total RPM (reads per million)
		BO	Empty B6 Average RPM
		BP	Empty CAST Average RPM
		BQ	WT B6 Average RPM
		BR	WT CAST Average RPM
		BS	DKO B6 Average RPM
		BT	DKO CAST Average RPM
		BU	GFP B6 Average RPM
		BV	GFP CAST Average RPM
		BW	FL SAFB B6 Average RPM
		BX	FL SAFB CAST Average RPM
		BY	DD3∆ B6 Average RPM
		BZ	DD3∆ CAST Average RPM
		CA	Log2 Empty B6 Average RPM
		CB	Log2 WT B6 Average RPM
		CC	Log2 DKO B6 Average RPM
		CD	Log2 GFP B6 Average RPM
		CE	Log2 FL-SAFB B6 Average RPM
		CF	Log2 ∆DD3 B6 Average RPM

## Sheet: All Chr6 Genes
id	gene	chr	start	end	strand	empty1_RNAseq_B6_total reads	empty1_RNAseq_cast_total reads	empty2_RNAseq_B6_total reads	empty2_RNAseq_cast_total reads	empty3_RNAseq_B6_total reads	empty3_RNAseq_cast_total reads	empty4_RNAseq_B6_total reads	empty4_RNAseq_cast_total reads	parent_B6_total reads	parent_cast_total reads	wt20_B6_total reads	wt20_cast_total reads	wt44_B6_total reads	wt44_cast_total reads	dko13_B6_total reads	dko13_cast_total reads	dko4_B6_total reads	dko4_cast_total reads	dko13-egfp-rep1_b6_total reads	dko13-egfp-rep1_cast_total reads	dko13-egfp-rep2_b6_total reads	dko13-egfp-rep2_cast_total reads	dko13-fl-safb-rep1_b6_total reads	dko13-fl-safb-rep1_cast_total reads	dko13-fl-safb-rep2_b6_total reads	dko13-fl-safb-rep2_cast_total reads	dko13-safb-dd3∆-rep1_b6_total reads	dko13-safb-dd3∆-rep1_cast_total reads	dko13-safb-dd3∆-rep2_b6_total reads	dko13-safb-dd3∆-rep2_cast_total reads
Gm23551_chr6_3051289_3051409_(-)	Gm23551	chr6	3051289	3051409	-	0	0	0	0	0	0	0	0	0	0	0	0	0	0	0	0	0	0	0	0	0	0	0	0	0	0	0	0	0	0
Vmn1r-ps5_chr6_3072137_3073067_(-)	Vmn1r-ps5	chr6	3072137	3073067	-	0	0	0	0	0	0	0	0	0	0	0	0	0	0	0	0	0	0	0	0	0	0	0	0	0	0	0	0	0	0
Vmn1r-ps6_chr6_3107477_3112864_(-)	Vmn1r-ps6	chr6	3107477	3112864	-	0	0	0	0	0	0	0	0	0	0	0	0	0	0	0	0	0	0	0	0	0	0	0	0	0	0	0	0	0	0
Vmn1r261_chr6_3143627_3144554_(-)	Vmn1r261	chr6	3143627	3144554	-	0	0	0	0	0	0	0	0	0	0	0	0	0	0	0	0	0	0	0	0	0	0	0	0	0	0	0	0	0	0
Gm42642_chr6_3182630_3182984_(-)	Gm42642	chr6	3182630	3182984	-	0	0	0	0	0	1	0	0	0	0	0	0	0	0	0	1	0	0	0	0	0	0	0	0	0	0	0	1	0	0
Gm42959_chr6_3190691_3190902_(+)	Gm42959	chr6	3190691	3190902	+	0	0	0	0	0	0	0	0	0	0	0	0	0	0	0	0	0	0	0	0	0	0	0	0	0	0	0	0	0	0
Gm2651_chr6_3207869_3208706_(+)	Gm2651	chr6	3207869	3208706	+	0	0	0	0	0	0	0	0	0	0	0	0	0	0	0	0	0	0	0	1	0	1	0	0	0	0	0	0	0	0
Gm42960_chr6_3230792_3231032_(+)	Gm42960	chr6	3230792	3231032	+	0	0	0	0	0	0	0	0	0	0	0	0	0	0	0	0	0	0	0	1	0	0	0	0	0	0	0	0	0	0
Gm42961_chr6_3277553_3277733_(+)	Gm42961	chr6	3277553	3277733	+	0	0	0	0	0	0	0	0	0	0	0	0	0	0	0	0	0	0	0	0	0	0	0	0	0	0	0	0	0	0
Gm8579_chr6_3288519_3317019_(+)	Gm8579	chr6	3288519	3317019	+	0	0	0	0	0	0	0	3	0	0	1	1	0	0	0	0	0	0	0	3	0	4	0	0	0	0	0	2	0	4
Gm18222_chr6_3318530_3319916_(+)	Gm18222	chr6	3318530	3319916	+	0	0	0	0	0	0	0	0	0	1	0	0	0	1	0	0	0	3	0	0	0	0	0	0	0	0	0	0	0	0
Gm43196_chr6_3325742_3327855_(-)	Gm43196	chr6	3325742	3327855	-	0	0	0	0	0	0	0	0	0	0	0	0	0	0	0	0	0	0	0	0	0	1	0	0	0	0	0	0	1	0
Gm20559_chr6_3333194_3346128_(-)	Gm20559	chr6	3333194	3346128	-	6	2	9	2	6	5	9	3	2	1	0	4	2	0	3	2	3	1	40	5	12	9	2	1	11	4	14	6	18	5
Gm43198_chr6_3334633_3334958_(+)	Gm43198	chr6	3334633	3334958	+	0	0	0	0	0	0	0	0	0	0	0	0	0	0	0	0	0	0	0	0	0	0	0	0	0	0	0	0	0	0
Gm43197_chr6_3336772_3339354_(-)	Gm43197	chr6	3336772	3339354	-	0	0	0	0	0	0	0	0	0	0	0	0	0	0	0	0	0	0	0	0	0	0	0	0	0	0	2	1	0	1
Samd9l_chr6_3372257_3399572_(-)	Samd9l	chr6	3372257	3399572	-	4	4	3	17	2	16	3	23	1	3	3	9	2	12	0	14	1	9	11	78	3	42	2	17	6	34	11	44	10	50
Hepacam2_chr6_3457096_3498298_(-)	Hepacam2	chr6	3457096	3498298	-	0	0	0	1	2	1	0	0	0	1	0	0	1	0	0	0	0	1	0	3	2	4	0	0	0	3	2	3	0	3
Vps50_chr6_3498382_3603531_(+)	Vps50	chr6	3498382	3603531	+	241	334	354	380	312	351	317	341	102	158	141	221	155	250	194	247	111	180	310	402	245	308	259	307	211	363	263	358	221	346
Gm43294_chr6_3583814_3586303_(+)	Gm43294	chr6	3583814	3586303	+	4	5	6	3	4	4	3	4	1	1	3	4	0	5	5	2	3	0	8	3	7	4	2	3	2	1	8	4	5	5
Calcr_chr6_3685680_3764714_(-)	Calcr	chr6	3685680	3764714	-	2	1	2	14	8	13	4	1	0	4	0	1	4	8	0	5	0	4	0	6	2	4	1	11	1	7	0	5	1	1
Mir653_chr6_3721301_3721385_(-)	Mir653	chr6	3721301	3721385	-	0	0	0	0	0	0	0	0	0	0	0	0	0	0	0	0	0	0	0	0	0	0	0	0	0	0	0	0	0	0
Mir489_chr6_3721897_3722003_(-)	Mir489	chr6	3721897	3722003	-	0	0	0	0	0	0	0	0	0	0	0	0	0	0	0	0	0	0	0	0	0	0	0	0	0	0	0	0	0	0
Gm44221_chr6_3863049_3863436_(-)	Gm44221	chr6	3863049	3863436	-	0	0	0	0	0	0	0	0	0	0	0	0	0	0	0	0	0	0	0	0	0	0	0	0	0	0	0	0	0	0
Tfpi2_chr6_3962595_3988919_(-)	Tfpi2	chr6	3962595	3988919	-	0	0	0	4	0	3	0	1	0	0	1	0	0	0	0	0	0	0	2	1	0	0	0	0	0	1	0	0	0	0
Gngt1_chr6_3993792_3997436_(+)	Gngt1	chr6	3993792	3997436	+	0	0	0	0	0	0	0	0	0	0	0	0	0	0	0	0	0	0	0	0	0	0	0	0	0	0	0	0	0	0
Gng11_chr6_4003904_4008445_(+)	Gng11	chr6	4003904	4008445	+	1	4	1	1	0	0	0	0	0	0	1	0	0	0	0	0	0	0	1	1	0	0	0	1	0	0	1	0	0	1
4930528H21Rik_chr6_4031841_4047585_(-)	4930528H21Rik	chr6	4031841	4047585	-	0	0	0	0	0	0	0	0	0	0	0	0	0	0	0	0	0	0	0	0	0	0	0	0	0	0	0	0	0	0
Bet1_chr6_4076899_4086972_(-)	Bet1	chr6	4076899	4086972	-	80	70	64	54	57	74	72	63	9	28	28	27	11	28	26	43	20	19	60	97	79	94	57	88	68	93	72	89	96	113
Gm44055_chr6_4254088_4254334_(-)	Gm44055	chr6	4254088	4254334	-	0	0	0	0	0	0	0	0	0	0	0	0	0	0	0	0	0	0	0	0	0	0	0	0	0	0	0	0	0	0
Gm44057_chr6_4262754_4262849_(-)	Gm44057	chr6	4262754	4262849	-	0	0	0	0	0	0	0	0	0	0	0	0	0	0	0	0	0	0	0	0	0	0	0	0	0	0	0	0	0	0
Gm8602_chr6_4359028_4359634_(+)	Gm8602	chr6	4359028	4359634	+	0	0	0	0	0	0	0	0	0	0	1	0	0	0	1	0	0	1	0	0	1	0	0	0	1	0	0	0	0	0
Gm44379_chr6_4364232_4364395_(-)	Gm44379	chr6	4364232	4364395	-	0	0	0	0	0	0	0	0	0	0	0	0	0	0	0	0	0	0	0	0	0	0	0	0	0	0	0	0	0	0
Gm44380_chr6_4367774_4368066_(+)	Gm44380	chr6	4367774	4368066	+	0	0	0	0	0	0	0	0	0	0	0	0	0	0	0	0	0	0	0	0	0	0	0	0	0	0	0	0	0	0
Gm24442_chr6_4382878_4383204_(+)	Gm24442	chr6	4382878	4383204	+	0	0	0	0	0	0	0	0	0	0	0	0	0	0	0	0	0	0	0	0	0	0	0	0	0	0	0	0	0	0
Gm2522_chr6_4390920_4391241_(+)	Gm2522	chr6	4390920	4391241	+	0	0	0	0	0	0	0	0	0	0	0	0	0	0	0	0	0	0	0	0	0	0	0	0	0	0	0	0	0	0
Gm37883_chr6_4483474_4484198_(-)	Gm37883	chr6	4483474	4484198	-	0	0	0	0	0	0	0	0	0	0	0	0	0	0	0	0	0	0	0	0	0	0	0	0	0	0	0	0	0	0
Col1a2_chr6_4504814_4541544_(+)	Col1a2	chr6	4504814	4541544	+	3	9	0	4	0	1	0	0	0	2	1	2	0	3	0	4	0	0	0	1	1	2	0	1	0	3	0	1	0	0
Gm43921_chr6_4506087_4507878_(+)	Gm43921	chr6	4506087	4507878	+	0	0	0	0	0	0	0	0	0	0	0	0	0	0	0	0	0	0	0	0	0	0	0	0	0	0	0	0	0	0
Gm18289_chr6_4568728_4571716_(-)	Gm18289	chr6	4568728	4571716	-	0	0	0	0	0	0	0	0	0	0	0	0	0	0	0	0	0	0	0	0	0	0	0	0	0	0	0	0	0	0
Gm26696_chr6_4593804_4596651_(-)	Gm26696	chr6	4593804	4596651	-	1	0	0	0	0	0	2	0	0	2	0	1	0	0	0	0	0	0	0	0	0	2	0	0	0	1	0	0	1	1
Casd1_chr6_4600839_4643355_(+)	Casd1	chr6	4600839	4643355	+	53	85	45	80	62	69	59	70	9	27	19	50	28	44	12	44	8	24	29	93	33	66	31	64	20	78	30	77	32	57
Gm44432_chr6_4610234_4611171_(+)	Gm44432	chr6	4610234	4611171	+	4	2	3	8	4	4	5	2	1	0	1	2	1	2	0	0	0	4	1	3	3	0	1	3	0	1	0	1	2	4
Sgce_chr6_4674350_4747207_(-)	Sgce	chr6	4674350	4747207	-	113	21	88	21	51	19	58	11	17	16	38	20	20	18	24	57	19	16	23	38	32	55	25	109	27	92	24	53	29	59
Peg10_chr6_4747306_4760517_(+)	Peg10	chr6	4747306	4760517	+	3281	749	2011	422	1731	499	1533	65	133	116	238	114	204	201	131	338	84	101	403	870	405	891	327	799	291	1115	284	840	414	1024
Gm44121_chr6_4770900_4772905_(+)	Gm44121	chr6	4770900	4772905	+	0	0	0	0	0	0	0	0	0	0	0	0	0	0	0	0	0	0	0	1	0	0	0	0	0	1	0	0	0	0
Gm20714_chr6_4807055_4816329_(-)	Gm20714	chr6	4807055	4816329	-	0	0	1	0	0	0	0	0	0	0	0	0	0	0	0	0	0	0	0	0	0	0	0	0	0	0	0	0	0	0
Gm26828_chr6_4832227_4832398_(+)	Gm26828	chr6	4832227	4832398	+	0	0	0	0	0	0	0	0	0	0	0	0	0	0	0	0	0	0	0	0	0	0	0	0	0	0	0	0	0	0
Gmfg-ps_chr6_4893352_4893778_(-)	Gmfg-ps	chr6	4893352	4893778	-	0	0	0	0	0	0	0	0	0	0	0	0	0	0	0	0	0	0	0	0	0	0	0	0	0	0	0	0	0	0
Ppp1r9a_chr6_4902917_5165661_(+)	Ppp1r9a	chr6	4902917	5165661	+	968	772	861	760	863	716	984	751	310	652	585	982	364	848	396	1125	362	796	659	1209	581	1059	345	1033	433	1135	512	1083	506	1005
Gm26814_chr6_4942147_4946295_(+)	Gm26814	chr6	4942147	4946295	+	14	16	16	11	20	15	17	12	7	11	6	16	7	8	16	20	11	23	9	29	16	26	7	20	11	28	16	22	6	33
Gm26736_chr6_4946568_4947803_(+)	Gm26736	chr6	4946568	4947803	+	4	2	5	2	3	3	10	3	3	0	2	4	0	4	4	8	2	3	2	9	4	9	4	0	3	10	3	5	5	7
Gm26556_chr6_4958983_4959302_(+)	Gm26556	chr6	4958983	4959302	+	1	1	1	1	2	0	5	3	0	1	1	3	2	4	1	2	0	2	0	2	0	0	0	1	0	3	0	2	1	2
Pon1_chr6_5168090_5193946_(-)	Pon1	chr6	5168090	5193946	-	0	0	0	1	0	0	0	0	0	0	0	0	0	1	0	0	0	0	0	1	0	0	0	0	0	0	0	0	0	0
Gm44250_chr6_5216258_5220486_(-)	Gm44250	chr6	5216258	5220486	-	4	4	1	3	1	2	4	0	0	0	1	2	0	3	2	0	0	1	0	4	3	4	0	2	1	5	0	0	4	2
Pon3_chr6_5220852_5256286_(-)	Pon3	chr6	5220852	5256286	-	16	23	8	8	9	7	10	16	0	7	2	9	1	10	4	21	1	12	4	15	7	35	5	21	4	39	2	19	6	30
Pon2_chr6_5264147_5298455_(-)	Pon2	chr6	5264147	5298455	-	17	27	14	25	20	16	11	25	1	14	11	16	6	23	1	15	3	16	3	23	6	14	5	34	3	36	7	18	5	18
Gm44424_chr6_5279655_5281480_(+)	Gm44424	chr6	5279655	5281480	+	0	0	0	0	0	0	0	0	0	0	0	0	0	1	0	0	0	0	0	0	0	0	0	0	0	0	0	0	0	0
Asb4_chr6_5383386_5433022_(+)	Asb4	chr6	5383386	5433022	+	10	0	7	0	11	4	0	3	0	0	4	1	1	1	0	2	0	3	0	9	0	6	2	2	2	2	2	7	2	3
Pdk4_chr6_5483351_5496309_(-)	Pdk4	chr6	5483351	5496309	-	16	7	34	11	14	13	19	9	4	3	10	6	6	2	15	27	9	10	11	19	19	28	10	8	18	23	5	17	20	22
Dync1i1_chr6_5725639_6028039_(+)	Dync1i1	chr6	5725639	6028039	+	24	34	22	28	26	27	40	23	11	25	4	16	5	23	6	18	5	18	22	22	4	11	6	9	1	16	10	17	3	24
1700019G24Rik_chr6_5963909_5977393_(-)	1700019G24Rik	chr6	5963909	5977393	-	0	1	0	0	0	0	0	0	0	0	0	0	0	0	0	0	0	0	0	0	0	1	0	1	0	0	0	0	0	0
Slc25a13_chr6_6041218_6217173_(-)	Slc25a13	chr6	6041218	6217173	-	1269	1502	1602	1762	1341	1501	1586	2018	325	810	562	1311	401	1111	609	2033	409	1225	1037	3021	865	2405	492	1598	521	2028	812	2401	819	2399
Gm20619_chr6_6248659_6378675_(+)	Gm20619	chr6	6248659	6378675	+	0	0	0	1	0	0	0	0	0	1	1	0	0	0	0	0	1	0	0	1	0	0	1	0	0	0	0	1	1	0
Gm8649_chr6_6329762_6329994_(-)	Gm8649	chr6	6329762	6329994	-	0	0	0	0	0	0	0	0	0	0	0	0	0	0	0	0	0	0	0	0	0	0	0	0	0	0	0	0	0	0
Gm27018_chr6_6329998_6330222_(-)	Gm27018	chr6	6329998	6330222	-	0	0	0	0	0	0	0	0	0	0	0	0	0	0	0	0	1	0	0	0	0	0	0	0	1	0	0	0	0	0
Gm8652_chr6_6351304_6352267_(-)	Gm8652	chr6	6351304	6352267	-	0	1	0	0	0	0	2	1	0	0	0	1	0	0	2	0	0	0	0	1	0	0	1	0	0	0	1	0	1	0
Gm20617_chr6_6456189_6484487_(-)	Gm20617	chr6	6456189	6484487	-	0	0	0	0	0	0	0	0	0	0	0	0	0	0	0	1	0	0	0	1	0	0	1	0	0	0	0	0	0	0
Gm20685_chr6_6483022_6508616_(+)	Gm20685	chr6	6483022	6508616	+	0	0	0	0	0	0	0	0	0	0	0	0	0	0	0	0	0	0	0	0	0	0	0	0	0	0	0	0	0	0
Sem1_chr6_6557294_6578663_(-)	Sem1	chr6	6557294	6578663	-	123	142	123	141	123	112	107	97	28	44	37	51	34	66	23	69	24	30	123	135	95	120	88	118	75	134	100	113	72	115
Gm20618_chr6_6603219_6691521_(-)	Gm20618	chr6	6603219	6691521	-	0	0	0	1	0	0	0	0	0	0	0	0	0	0	0	0	0	0	0	0	0	0	0	0	0	0	0	0	0	0
Gm18006_chr6_6645334_6647278_(-)	Gm18006	chr6	6645334	6647278	-	0	0	0	0	0	0	0	0	0	0	0	0	0	0	0	0	0	0	0	0	0	0	0	0	0	0	0	0	0	0
Gm5873_chr6_6735427_6736492_(-)	Gm5873	chr6	6735427	6736492	-	0	0	0	0	0	0	0	0	0	0	0	0	0	0	0	0	0	0	0	0	0	0	0	0	0	0	0	0	0	0
Dlx6os1_chr6_6820189_6871592_(-)	Dlx6os1	chr6	6820189	6871592	-	1	0	1	2	3	0	1	1	0	0	0	0	0	0	0	0	0	0	1	1	0	0	0	0	0	0	0	0	0	0
Gm27699_chr6_6820942_6821121_(+)	Gm27699	chr6	6820942	6821121	+	0	0	0	0	0	0	0	0	0	0	0	0	0	0	0	0	0	0	0	0	0	0	0	0	0	0	0	0	0	0
Gm27905_chr6_6821129_6821335_(+)	Gm27905	chr6	6821129	6821335	+	0	0	0	0	0	0	0	0	0	0	0	0	0	0	0	0	0	0	0	0	0	0	0	0	0	0	0	0	0	0
Gm44094_chr6_6854222_6856251_(-)	Gm44094	chr6	6854222	6856251	-	0	0	0	0	0	0	0	0	0	0	0	0	0	0	0	0	0	0	0	0	0	0	0	0	0	0	0	0	0	0
Dlx6_chr6_6863334_6868568_(+)	Dlx6	chr6	6863334	6868568	+	0	0	0	0	0	2	0	0	0	0	0	0	0	0	0	0	0	0	0	0	0	0	0	0	0	0	1	0	0	0
Dlx6os2_chr6_6863797_6865150_(-)	Dlx6os2	chr6	6863797	6865150	-	0	0	0	0	0	0	0	0	0	0	0	0	0	0	0	0	0	0	0	0	0	0	0	0	0	0	0	0	0	0
Dlx6os1_chr6_6871488_6871633_(-)	Dlx6os1	chr6	6871488	6871633	-	0	0	0	0	0	0	0	0	0	0	0	0	0	0	0	0	0	0	0	0	0	0	0	0	0	0	0	0	0	0
Dlx5_chr6_6877805_6882085_(-)	Dlx5	chr6	6877805	6882085	-	0	0	1	1	0	1	0	0	0	0	0	0	0	0	0	0	0	0	0	0	0	0	0	0	0	0	0	0	0	0
Gm22155_chr6_6924118_6924279_(-)	Gm22155	chr6	6924118	6924279	-	0	0	0	0	0	0	0	0	0	0	0	0	0	0	0	0	0	0	0	0	0	0	0	0	0	0	0	0	0	0
Gm26774_chr6_6952170_6955900_(-)	Gm26774	chr6	6952170	6955900	-	0	0	0	0	0	0	0	0	0	0	0	0	0	0	0	0	0	0	0	0	0	0	0	0	0	0	0	0	0	0
Sdhaf3_chr6_6956004_7042979_(+)	Sdhaf3	chr6	6956004	7042979	+	135	118	155	93	136	97	152	87	48	51	88	81	66	86	96	109	63	76	214	255	222	187	151	182	146	184	187	190	183	203
Gm27190_chr6_7193548_7194172_(-)	Gm27190	chr6	7193548	7194172	-	0	0	0	3	0	0	0	1	0	0	0	0	0	1	0	0	0	0	0	1	0	3	0	0	0	0	0	0	0	0
Gm8669_chr6_7194272_7195216_(+)	Gm8669	chr6	7194272	7195216	+	0	2	0	1	0	1	0	0	0	0	0	1	0	0	0	0	0	0	0	1	0	1	0	1	0	1	1	0	0	0
Gm19272_chr6_7301908_7309747_(+)	Gm19272	chr6	7301908	7309747	+	0	0	0	0	0	0	0	0	0	0	0	0	0	0	0	1	0	0	0	0	0	0	0	0	0	0	0	0	0	0
Gm44046_chr6_7375967_7378644_(+)	Gm44046	chr6	7375967	7378644	+	0	0	0	0	0	0	0	0	0	0	0	0	0	0	0	0	0	0	0	0	0	0	0	0	0	0	0	0	0	0
Gm44048_chr6_7540954_7541314_(+)	Gm44048	chr6	7540954	7541314	+	0	0	0	0	0	0	0	0	0	0	0	0	0	0	0	0	0	0	0	0	0	0	0	0	0	0	0	0	0	0
Tac1_chr6_7554879_7565834_(+)	Tac1	chr6	7554879	7565834	+	1	1	0	1	1	0	0	0	0	0	0	0	1	0	0	0	0	0	0	0	0	0	0	0	0	0	0	0	0	1
Gm8676_chr6_7643906_7644542_(+)	Gm8676	chr6	7643906	7644542	+	0	0	0	0	0	0	0	0	0	0	0	0	0	0	0	0	0	0	0	0	0	0	0	0	0	0	0	0	0	0
Asns_chr6_7675169_7693254_(-)	Asns	chr6	7675169	7693254	-	809	1183	464	924	375	705	640	1042	210	478	296	618	186	500	289	628	228	505	565	1270	673	1278	422	988	518	1239	512	1125	687	1287
1700012J15Rik_chr6_7766394_7777681_(+)	1700012J15Rik	chr6	7766394	7777681	+	0	0	0	0	0	0	0	0	0	0	0	0	0	0	0	0	0	0	0	0	0	0	0	0	0	0	0	0	0	0
Gm8686_chr6_7835272_7835659_(-)	Gm8686	chr6	7835272	7835659	-	0	0	0	0	0	0	0	0	0	0	0	0	0	0	0	0	0	0	0	0	0	0	0	0	0	0	0	0	0	0
C1galt1_chr6_7844842_7875687_(+)	C1galt1	chr6	7844842	7875687	+	169	227	162	283	160	224	175	317	41	87	51	131	40	107	32	165	35	86	92	258	88	228	60	256	58	272	79	230	80	271
Gm43961_chr6_7853871_7855742_(+)	Gm43961	chr6	7853871	7855742	+	6	4	4	6	3	8	5	13	0	2	2	8	1	7	2	3	0	5	3	9	4	10	4	14	3	10	6	7	2	8
Gm43962_chr6_7863187_7863376_(-)	Gm43962	chr6	7863187	7863376	-	0	0	0	0	0	0	0	0	0	0	0	0	0	0	0	0	0	0	0	0	0	0	0	0	0	0	0	0	0	0
Gm22276_chr6_7879563_7879691_(+)	Gm22276	chr6	7879563	7879691	+	0	0	0	0	0	0	0	0	0	0	0	0	0	0	0	0	0	0	0	0	0	0	0	0	0	0	0	0	0	0
Rnps1-ps_chr6_7982541_7983383_(-)	Rnps1-ps	chr6	7982541	7983383	-	0	0	0	0	0	0	0	0	0	0	0	0	0	0	0	0	0	0	0	0	0	0	0	0	0	0	0	0	0	0
Col28a1_chr6_7997808_8192617_(-)	Col28a1	chr6	7997808	8192617	-	0	2	1	6	1	3	2	6	0	2	0	3	1	2	0	5	0	3	1	4	0	2	0	5	1	9	0	6	1	2
Mios_chr6_8209222_8236274_(+)	Mios	chr6	8209222	8236274	+	205	261	249	343	215	337	213	333	45	96	74	154	52	137	65	138	47	133	130	263	123	256	107	242	97	294	111	221	133	258
Rpa3_chr6_8255936_8259173_(-)	Rpa3	chr6	8255936	8259173	-	85	96	99	101	91	90	85	109	6	18	14	27	10	32	6	23	4	24	85	164	98	160	66	132	59	125	82	132	111	192
Umad1_chr6_8259288_8459470_(+)	Umad1	chr6	8259288	8459470	+	142	165	126	142	133	117	149	120	44	95	79	118	57	117	42	123	50	109	116	210	97	156	75	174	64	211	91	212	95	186
Gm45062_chr6_8259450_8597480_(+)	Gm45062	chr6	8259450	8597480	+	51	46	53	66	65	94	35	66	7	34	17	60	14	57	6	37	16	35	42	102	32	75	16	78	20	105	35	68	30	74
Gm16055_chr6_8354056_8364136_(-)	Gm16055	chr6	8354056	8364136	-	0	0	0	0	0	1	0	0	0	0	0	0	0	0	0	0	0	0	0	0	0	0	0	2	0	0	0	0	0	0
Gm8428_chr6_8377596_8379379_(-)	Gm8428	chr6	8377596	8379379	-	0	0	0	1	0	0	0	0	0	0	0	1	0	0	0	0	0	0	0	0	0	0	0	0	0	0	0	0	0	0
Gm16043_chr6_8420009_8443455_(-)	Gm16043	chr6	8420009	8443455	-	0	0	0	0	0	0	0	0	0	0	1	0	0	0	0	0	0	0	0	0	0	0	0	0	0	0	0	0	0	0
Gm24059_chr6_8439353_8439664_(+)	Gm24059	chr6	8439353	8439664	+	0	0	0	1	0	0	0	0	0	0	0	0	0	0	0	1	0	0	0	0	0	0	0	0	0	0	0	0	0	0
A430035B10Rik_chr6_8488795_8510430_(-)	A430035B10Rik	chr6	8488795	8510430	-	1	1	3	0	1	0	2	0	0	0	1	0	1	1	0	0	0	0	0	1	0	0	0	0	0	3	0	0	0	0
Gm26075_chr6_8501236_8501356_(-)	Gm26075	chr6	8501236	8501356	-	0	0	0	0	0	0	0	0	0	0	0	0	0	0	0	0	0	0	0	0	0	0	0	0	0	0	0	0	0	0
Glcci1_chr6_8509600_8597548_(+)	Glcci1	chr6	8509600	8597548	+	1	1	0	0	0	2	0	2	0	0	1	2	0	0	0	1	0	0	0	0	0	1	1	0	0	0	0	2	0	0
Gm16042_chr6_8595743_8596989_(-)	Gm16042	chr6	8595743	8596989	-	0	0	0	0	0	0	0	1	0	1	0	0	0	0	0	0	0	0	0	0	0	1	0	0	0	1	0	1	0	0
Ica1_chr6_8630527_8778488_(-)	Ica1	chr6	8630527	8778488	-	85	136	80	82	84	97	69	89	27	57	37	83	23	60	23	92	20	72	29	82	25	84	38	108	20	132	27	68	34	100
Nxph1_chr6_8948431_9249032_(+)	Nxph1	chr6	8948431	9249032	+	2	11	6	30	5	54	3	7	0	11	1	12	4	19	0	3	0	0	0	18	0	1	5	7	1	4	0	5	0	2
Gm35736_chr6_9146766_9147078_(+)	Gm35736	chr6	9146766	9147078	+	0	0	0	0	0	0	0	0	0	0	0	0	0	0	0	0	0	0	0	0	0	0	0	0	0	0	0	0	0	0
Gm5110_chr6_10171792_10172854_(-)	Gm5110	chr6	10171792	10172854	-	0	0	0	0	0	0	0	0	0	0	0	0	0	0	0	0	0	0	0	0	0	0	0	0	0	0	0	0	0	0
Gm18421_chr6_10334296_10334920_(+)	Gm18421	chr6	10334296	10334920	+	0	0	0	0	0	0	0	0	0	0	0	0	0	0	0	0	0	0	0	0	0	0	0	0	0	0	0	0	0	0
Gm2691_chr6_10774114_10775014_(-)	Gm2691	chr6	10774114	10775014	-	0	0	0	0	0	0	0	0	0	0	0	0	0	0	0	0	0	0	0	0	0	0	0	0	0	0	0	0	0	0
Gm43960_chr6_10804828_10809847_(+)	Gm43960	chr6	10804828	10809847	+	0	0	0	0	0	0	0	0	0	0	0	0	0	0	0	0	0	0	0	0	0	0	0	0	0	0	0	0	0	0
Gm26058_chr6_10840587_10840693_(-)	Gm26058	chr6	10840587	10840693	-	0	0	0	0	0	0	0	0	0	0	0	0	0	0	0	0	0	0	0	0	0	0	0	0	0	0	0	0	0	0
Gm27894_chr6_10858427_10858518_(+)	Gm27894	chr6	10858427	10858518	+	0	0	0	0	0	0	0	0	0	0	0	0	0	0	0	0	0	0	0	0	0	0	0	0	0	0	0	0	0	0
Gm8744_chr6_10882429_10888600_(+)	Gm8744	chr6	10882429	10888600	+	0	0	0	0	0	0	0	0	0	0	0	0	0	0	0	0	0	0	0	0	0	0	0	0	0	0	0	0	0	0
Gm35822_chr6_10895490_10970126_(+)	Gm35822	chr6	10895490	10970126	+	0	0	0	0	0	0	0	0	2	0	0	0	0	0	0	0	0	0	1	0	0	0	0	0	0	0	0	0	0	0
AA545190_chr6_10971560_10979638_(-)	AA545190	chr6	10971560	10979638	-	0	0	0	1	0	2	0	2	0	0	0	0	0	1	0	0	0	0	0	0	0	0	0	0	0	0	0	1	0	1
Ndufa4_chr6_11900292_11907497_(-)	Ndufa4	chr6	11900292	11907497	-	179	201	240	225	193	179	215	224	42	45	41	67	27	53	31	56	31	39	200	242	200	258	163	185	146	211	168	172	204	252
Phf14_chr6_11907809_12081205_(+)	Phf14	chr6	11907809	12081205	+	415	330	404	323	399	311	386	348	131	128	181	241	137	225	127	187	121	168	315	273	305	245	267	312	236	307	254	271	276	265
Gm6578_chr6_12099518_12109583_(-)	Gm6578	chr6	12099518	12109583	-	13	3	6	2	6	0	15	3	3	0	2	0	1	0	1	4	1	0	8	1	6	2	5	0	3	2	2	4	6	4
Gm32222_chr6_12128626_12128923_(+)	Gm32222	chr6	12128626	12128923	+	0	0	0	0	0	0	0	0	0	0	0	0	0	0	0	0	0	0	0	0	0	0	0	0	0	0	0	0	0	0
Thsd7a_chr6_12311610_12749410_(-)	Thsd7a	chr6	12311610	12749410	-	45	278	89	238	113	387	7	63	15	139	19	263	19	284	4	121	7	125	12	32	12	41	13	98	9	189	7	23	6	30
Gm16123_chr6_12565518_12567222_(+)	Gm16123	chr6	12565518	12567222	+	0	0	0	0	0	0	0	0	0	0	0	0	0	0	0	0	0	0	0	0	0	0	0	0	0	0	0	0	0	0
Gm44129_chr6_12608996_12658956_(+)	Gm44129	chr6	12608996	12658956	+	1	0	2	0	1	0	2	0	0	0	1	1	0	0	1	0	0	0	0	0	0	0	0	0	0	0	3	1	0	0
n-R5s160_chr6_12742899_12743018_(+)	n-R5s160	chr6	12742899	12743018	+	0	0	0	0	0	0	0	0	0	0	0	0	0	0	0	0	0	0	0	0	0	0	0	0	0	0	0	0	0	0
Gm15529_chr6_12857397_12858390_(+)	Gm15529	chr6	12857397	12858390	+	0	0	0	1	0	1	0	1	0	0	0	0	0	0	0	2	0	0	2	2	0	1	0	0	0	3	1	2	0	2
Gm44472_chr6_12917525_12918467_(+)	Gm44472	chr6	12917525	12918467	+	0	0	0	0	0	0	0	0	0	0	0	0	0	0	0	0	0	0	0	0	0	0	0	0	0	0	0	0	0	0
Gm5300_chr6_13055595_13056597_(-)	Gm5300	chr6	13055595	13056597	-	0	0	1	1	2	0	0	1	0	0	0	0	0	0	0	0	0	1	0	0	0	0	1	0	0	0	0	0	0	0
Tmem106b_chr6_13069759_13089269_(+)	Tmem106b	chr6	13069759	13089269	+	58	61	41	56	48	66	65	59	7	18	24	36	13	31	14	38	18	28	38	59	66	95	22	62	32	73	43	69	60	91
Gm24985_chr6_13111299_13111427_(+)	Gm24985	chr6	13111299	13111427	+	0	0	0	0	0	0	0	0	0	0	0	0	0	0	0	0	0	0	0	0	0	0	0	0	0	0	0	0	0	0
Vwde_chr6_13156299_13224965_(-)	Vwde	chr6	13156299	13224965	-	2	2	1	4	3	3	0	2	0	0	0	2	0	0	0	0	0	2	0	9	1	10	0	0	1	3	1	8	2	3
AC121573.1_chr6_13263745_13264588_(+)	AC121573.1	chr6	13263745	13264588	+	0	0	0	0	0	0	0	0	0	0	0	0	0	0	0	0	0	0	0	0	0	0	0	0	0	0	0	0	0	0
1700016P04Rik_chr6_13413337_13415996_(+)	1700016P04Rik	chr6	13413337	13415996	+	0	0	0	0	0	0	0	0	0	0	0	0	0	0	0	0	0	0	0	0	0	0	0	0	0	0	0	0	0	0
Gm2796_chr6_13461462_13461957_(-)	Gm2796	chr6	13461462	13461957	-	0	0	0	0	0	0	0	0	0	0	0	0	1	0	0	0	0	0	0	0	0	0	0	0	0	0	0	0	0	0
Gm25737_chr6_13549506_13549612_(+)	Gm25737	chr6	13549506	13549612	+	0	0	0	0	0	0	0	0	0	0	0	0	0	0	0	0	0	0	0	0	0	0	0	0	0	0	0	0	0	0
Tmem168_chr6_13580687_13608100_(-)	Tmem168	chr6	13580687	13608100	-	82	68	95	80	87	77	72	81	17	31	43	64	22	49	29	71	21	37	82	74	80	103	62	75	43	87	62	90	76	97
Bmt2_chr6_13625673_13677966_(-)	Bmt2	chr6	13625673	13677966	-	97	102	100	101	106	87	92	91	23	35	48	73	39	52	49	60	27	45	88	148	102	134	71	93	70	116	73	101	126	159
Gpr85_chr6_13834458_13839942_(-)	Gpr85	chr6	13834458	13839942	-	2	0	1	0	1	1	1	0	0	0	1	0	0	0	0	0	0	0	0	0	0	0	0	2	1	0	0	0	1	0
2610001J05Rik_chr6_13867735_13871518_(-)	2610001J05Rik	chr6	13867735	13871518	-	57	23	52	36	39	36	37	47	6	17	10	13	3	14	11	27	5	13	44	54	32	62	26	31	25	44	24	39	49	62
1110019D14Rik_chr6_13871526_14044385_(+)	1110019D14Rik	chr6	13871526	14044385	+	228	27	199	25	204	24	248	19	47	16	98	24	89	23	76	28	50	23	232	59	169	81	142	42	122	63	196	38	177	52
Gm44412_chr6_13913155_13913448_(-)	Gm44412	chr6	13913155	13913448	-	0	0	0	0	0	0	0	0	0	0	0	0	0	0	0	0	0	0	0	0	0	0	0	0	0	0	0	0	0	0
Gm44411_chr6_14006007_14006355_(+)	Gm44411	chr6	14006007	14006355	+	0	0	0	0	0	0	0	0	0	0	0	0	0	0	1	0	0	0	1	0	1	0	0	0	0	0	0	0	0	0
Gm19252_chr6_14081331_14081635_(-)	Gm19252	chr6	14081331	14081635	-	0	0	0	0	0	0	0	0	0	0	0	0	0	0	0	0	0	0	0	0	0	0	0	0	0	0	0	0	0	0
Gm23760_chr6_14113316_14113431_(+)	Gm23760	chr6	14113316	14113431	+	0	0	0	0	0	0	0	0	0	0	0	0	0	0	0	0	0	0	0	0	0	0	0	0	0	0	0	0	0	0
Gm8820_chr6_14389481_14390051_(-)	Gm8820	chr6	14389481	14390051	-	0	0	0	0	0	0	0	0	0	0	0	0	0	0	0	0	0	0	0	0	0	0	0	0	0	0	0	0	0	0
Gm23013_chr6_14457045_14457150_(-)	Gm23013	chr6	14457045	14457150	-	0	0	0	0	0	0	0	0	0	0	0	0	0	0	0	0	0	0	0	0	0	0	0	0	0	0	0	0	0	0
Gm44446_chr6_14570771_14571025_(-)	Gm44446	chr6	14570771	14571025	-	0	0	0	0	0	0	0	0	0	0	0	0	0	0	0	0	0	0	0	0	0	0	0	0	0	0	0	0	0	0
Ppp1r3a_chr6_14713977_14755274_(-)	Ppp1r3a	chr6	14713977	14755274	-	0	0	0	0	0	0	0	0	0	0	0	0	0	0	0	0	0	0	0	0	0	0	0	0	0	0	0	0	0	0
Foxp2_chr6_14901349_15441977_(+)	Foxp2	chr6	14901349	15441977	+	28	41	30	45	41	55	19	31	5	30	16	50	10	46	7	13	4	15	3	15	7	25	4	44	12	52	2	19	6	19
Gm25470_chr6_15404981_15405091_(+)	Gm25470	chr6	15404981	15405091	+	0	0	0	0	0	0	0	0	0	0	0	0	0	0	0	0	0	0	0	0	0	0	0	0	0	0	0	0	0	0
Gm44039_chr6_15636124_15638369_(+)	Gm44039	chr6	15636124	15638369	+	0	0	0	0	0	0	0	0	0	0	0	0	0	0	0	0	0	0	0	0	0	0	0	0	0	0	0	0	0	0
Mdfic_chr6_15720661_15802169_(+)	Mdfic	chr6	15720661	15802169	+	114	100	89	134	63	106	49	92	8	47	31	83	20	62	13	79	13	60	23	134	22	88	21	114	35	132	23	114	32	131
Gm43924_chr6_15811323_15813058_(+)	Gm43924	chr6	15811323	15813058	+	0	0	0	2	0	0	0	1	0	1	0	0	0	0	0	0	0	0	0	1	0	1	1	3	0	1	0	2	0	1
Gm43990_chr6_15836089_15837779_(+)	Gm43990	chr6	15836089	15837779	+	0	0	0	0	0	0	0	1	0	0	0	0	0	0	0	0	0	0	0	0	0	0	0	0	0	0	0	0	0	0
Gm43991_chr6_16089686_16089959_(-)	Gm43991	chr6	16089686	16089959	-	0	0	0	0	0	0	0	0	0	0	0	0	0	0	0	0	0	0	0	0	0	0	0	0	0	0	0	0	0	0
Gm43993_chr6_16233244_16233490_(-)	Gm43993	chr6	16233244	16233490	-	0	0	0	0	0	0	0	0	0	0	0	0	0	0	0	0	0	0	0	0	0	0	0	0	0	0	0	0	0	0
Gm3148_chr6_16237627_16238238_(+)	Gm3148	chr6	16237627	16238238	+	0	0	0	1	0	0	0	0	0	0	0	0	0	1	0	0	0	0	0	2	0	0	0	0	0	0	0	0	0	0
Gm36406_chr6_16457390_16469950_(-)	Gm36406	chr6	16457390	16469950	-	0	0	0	0	0	0	0	0	0	0	0	0	0	0	0	0	0	0	0	0	0	0	0	0	0	0	0	0	0	0
Gm36503_chr6_16550387_16579873_(+)	Gm36503	chr6	16550387	16579873	+	0	0	0	0	0	0	0	0	0	0	0	0	0	0	0	0	0	0	0	0	0	0	1	0	0	0	0	0	1	0
Gm36669_chr6_16777524_16788820_(+)	Gm36669	chr6	16777524	16788820	+	0	0	0	0	0	0	0	0	0	0	0	0	0	0	0	0	0	0	0	0	1	0	0	0	0	0	0	0	0	0
Tfec_chr6_16833373_16898441_(-)	Tfec	chr6	16833373	16898441	-	2	1	1	0	0	0	6	2	0	0	0	0	0	0	0	0	0	0	1	0	0	1	0	0	0	0	0	0	0	0
Gm5721_chr6_16925231_16926926_(+)	Gm5721	chr6	16925231	16926926	+	0	0	0	0	0	0	0	0	0	0	0	0	0	0	0	0	0	0	0	0	0	0	0	0	0	0	0	0	0	0
Gm15473_chr6_17058806_17064996_(-)	Gm15473	chr6	17058806	17064996	-	1	0	0	0	0	0	0	0	0	0	0	0	0	0	0	0	0	0	1	0	0	0	0	1	0	0	0	0	0	0
Gm4876_chr6_17065010_17171833_(-)	Gm4876	chr6	17065010	17171833	-	1	2	1	1	1	1	2	1	1	1	1	0	1	2	1	0	0	1	0	0	0	2	1	0	0	1	0	1	0	0
Tes_chr6_17065149_17105828_(+)	Tes	chr6	17065149	17105828	+	155	131	136	143	121	100	101	67	23	48	38	78	18	61	30	97	16	75	43	93	51	92	17	102	32	120	35	85	45	85
D830026I12Rik_chr6_17197751_17210152_(+)	D830026I12Rik	chr6	17197751	17210152	+	0	0	0	0	0	0	0	0	0	0	0	0	0	0	0	0	0	0	0	0	0	0	0	0	0	0	0	0	0	0
Gm15581_chr6_17206823_17385604_(-)	Gm15581	chr6	17206823	17385604	-	0	1	0	1	0	0	0	1	0	0	0	0	0	0	1	0	0	0	0	0	0	0	0	0	1	1	0	2	0	0
Cav2_chr6_17281185_17289115_(+)	Cav2	chr6	17281185	17289115	+	13	2	8	5	1	2	0	1	0	0	1	0	1	1	0	1	0	0	0	1	1	1	0	0	0	3	0	0	0	1
Cav1_chr6_17306335_17341452_(+)	Cav1	chr6	17306335	17341452	+	5	8	21	30	12	3	0	0	0	0	6	1	2	1	0	2	2	1	1	2	0	1	0	4	0	2	0	1	0	0
Gm29591_chr6_17347733_17348340_(+)	Gm29591	chr6	17347733	17348340	+	0	0	0	0	0	0	0	0	0	0	0	0	0	0	0	0	0	0	0	0	0	0	0	0	0	0	0	0	0	0
Gm25021_chr6_17436306_17436412_(+)	Gm25021	chr6	17436306	17436412	+	0	0	0	0	0	0	0	0	0	0	0	0	0	0	0	0	0	0	0	0	0	0	0	0	0	0	0	0	0	0
Met_chr6_17463800_17573980_(+)	Met	chr6	17463800	17573980	+	58	75	61	65	41	82	34	37	8	30	11	55	9	30	9	48	9	37	20	44	14	31	12	58	17	52	17	53	11	54
Capza2_chr6_17636234_17666972_(+)	Capza2	chr6	17636234	17666972	+	181	196	198	206	149	181	188	193	23	53	44	80	25	66	46	93	42	65	119	219	107	186	72	171	69	179	87	165	92	175
St7_chr6_17692933_17943025_(+)	St7	chr6	17692933	17943025	+	142	154	146	107	135	120	109	109	38	68	46	99	34	87	25	62	24	55	43	67	46	57	31	105	36	123	22	71	36	62
Gm27755_chr6_17693426_17693557_(+)	Gm27755	chr6	17693426	17693557	+	0	0	0	0	0	0	0	0	0	0	0	0	0	0	0	0	0	0	0	0	0	0	0	0	0	0	0	0	0	0
Gm27762_chr6_17693937_17694045_(+)	Gm27762	chr6	17693937	17694045	+	0	0	0	0	0	0	0	0	0	0	0	0	0	0	0	0	0	0	0	0	0	0	0	0	0	0	0	0	0	0
Gm27960_chr6_17694902_17695085_(+)	Gm27960	chr6	17694902	17695085	+	0	1	0	0	0	0	0	0	0	0	0	0	0	0	0	0	0	0	0	0	0	0	0	0	0	0	0	0	0	0
Gm27365_chr6_17695354_17695530_(+)	Gm27365	chr6	17695354	17695530	+	2	0	0	1	0	1	0	1	0	0	0	0	0	0	0	0	0	0	0	0	0	0	0	1	0	0	0	0	0	0
Gm27542_chr6_17696894_17697149_(+)	Gm27542	chr6	17696894	17697149	+	1	0	1	1	0	0	0	0	0	1	0	0	0	3	0	0	0	0	0	0	0	0	0	1	0	0	0	0	1	0
Gm28008_chr6_17703231_17703416_(+)	Gm28008	chr6	17703231	17703416	+	0	0	0	0	0	0	0	0	0	0	0	0	0	0	0	0	0	0	0	0	0	0	0	0	0	0	0	0	0	0
Gm13898_chr6_17710598_17711207_(-)	Gm13898	chr6	17710598	17711207	-	0	0	0	0	0	0	0	0	0	0	0	0	0	0	0	0	0	0	0	0	0	0	0	0	0	0	0	0	0	0
Gm13899_chr6_17711687_17712941_(-)	Gm13899	chr6	17711687	17712941	-	0	0	0	0	0	0	0	0	0	0	0	0	0	0	0	0	0	1	0	0	0	0	0	0	0	0	0	0	0	0
Gm43533_chr6_17717578_17720513_(+)	Gm43533	chr6	17717578	17720513	+	11	5	6	5	14	9	9	5	8	7	3	7	2	9	2	2	2	2	5	6	1	5	2	7	0	4	4	5	2	3
Gm42852_chr6_17747522_17748900_(-)	Gm42852	chr6	17747522	17748900	-	0	0	0	0	0	0	0	0	0	0	0	0	0	0	0	0	0	0	0	0	0	0	0	0	0	0	0	0	0	0
Gm26738_chr6_17834585_17835185_(-)	Gm26738	chr6	17834585	17835185	-	1	1	0	0	1	2	0	0	0	0	0	1	0	0	0	0	0	0	1	0	0	0	0	2	1	1	1	2	0	0
Gm27444_chr6_17905707_17905843_(+)	Gm27444	chr6	17905707	17905843	+	0	0	0	0	0	0	0	0	0	0	0	0	0	0	0	0	0	0	0	0	0	0	0	0	0	0	0	0	0	0
Gm27402_chr6_17907172_17907291_(+)	Gm27402	chr6	17907172	17907291	+	0	0	0	0	0	0	0	0	0	0	0	0	0	0	0	0	0	0	0	0	0	0	0	0	0	0	0	0	0	0
Gm43844_chr6_17914996_17920600_(+)	Gm43844	chr6	17914996	17920600	+	0	0	0	0	0	0	0	0	0	0	0	0	0	0	0	0	0	0	0	0	0	1	0	0	0	0	0	0	0	1
Wnt2_chr6_17988940_18030585_(-)	Wnt2	chr6	17988940	18030585	-	0	0	0	2	1	0	0	0	0	0	0	0	0	0	1	1	0	0	0	0	0	0	0	0	0	0	0	0	0	0
Asz1_chr6_18050964_18109061_(-)	Asz1	chr6	18050964	18109061	-	1	0	2	0	0	0	3	0	0	0	0	1	0	0	0	0	0	0	0	1	0	0	0	0	0	2	5	1	2	1
Gm43845_chr6_18110142_18111961_(-)	Gm43845	chr6	18110142	18111961	-	0	0	0	0	0	0	0	0	0	0	0	0	0	0	0	0	0	0	0	0	0	0	0	0	0	0	0	0	0	0
Gm15593_chr6_18144734_18145741_(+)	Gm15593	chr6	18144734	18145741	+	1	1	1	1	2	2	0	0	1	0	4	1	3	2	8	1	3	1	1	3	4	4	2	1	0	2	0	0	0	0
Gm15596_chr6_18156337_18157120_(-)	Gm15596	chr6	18156337	18157120	-	0	0	0	0	0	0	0	0	0	0	0	0	0	0	0	0	0	0	0	0	0	0	0	0	0	0	0	0	0	0
Cftr_chr6_18170687_18322768_(+)	Cftr	chr6	18170687	18322768	+	14	5	12	2	17	11	2	0	3	3	6	3	4	0	2	1	0	0	3	1	2	1	5	3	2	2	1	0	2	2
Gm15592_chr6_18270136_18289048_(-)	Gm15592	chr6	18270136	18289048	-	0	0	0	0	0	0	0	0	0	0	0	0	0	0	0	0	0	0	0	0	0	0	0	0	0	0	0	0	0	0
Gm15595_chr6_18294271_18295231_(+)	Gm15595	chr6	18294271	18295231	+	0	0	0	0	0	0	0	0	0	0	0	0	0	0	0	0	0	0	0	0	0	0	0	0	0	0	0	0	0	0
Cttnbp2_chr6_18366478_18514843_(-)	Cttnbp2	chr6	18366478	18514843	-	17	8	24	11	18	6	35	11	6	14	9	6	7	8	1	11	3	8	18	13	12	8	6	11	11	7	10	11	9	12
Gm15594_chr6_18424684_18427885_(+)	Gm15594	chr6	18424684	18427885	+	0	0	0	0	0	0	0	0	0	0	0	0	0	0	0	0	0	0	0	0	0	0	0	0	0	0	0	0	0	0
Gm43843_chr6_18429659_18431245_(-)	Gm43843	chr6	18429659	18431245	-	1	0	0	0	1	0	0	0	0	0	0	0	0	0	0	0	0	0	0	0	0	0	0	0	0	0	1	0	0	1
Gm26233_chr6_18449271_18449340_(-)	Gm26233	chr6	18449271	18449340	-	0	0	0	0	0	0	0	0	0	0	0	0	0	0	0	0	0	0	0	0	0	0	0	0	0	0	0	0	0	0
Gm23648_chr6_18727292_18727398_(+)	Gm23648	chr6	18727292	18727398	+	0	0	0	0	0	0	0	0	0	0	0	0	0	0	0	0	0	0	0	0	0	0	0	0	0	0	0	0	0	0
Gm43228_chr6_18792851_18793114_(+)	Gm43228	chr6	18792851	18793114	+	0	0	0	0	0	0	0	0	0	0	0	0	0	0	0	0	0	0	0	0	0	0	0	0	0	0	0	0	0	0
Gm5874_chr6_18824552_18825059_(+)	Gm5874	chr6	18824552	18825059	+	0	0	0	0	0	1	0	0	0	0	0	0	0	0	0	0	0	0	1	0	1	0	0	0	1	0	0	0	0	0
Gm20186_chr6_18845910_18848207_(-)	Gm20186	chr6	18845910	18848207	-	1	0	0	0	0	0	0	0	0	0	0	0	0	0	0	0	0	0	0	0	0	0	0	1	0	0	0	0	0	0
Lsm8_chr6_18848579_18855751_(+)	Lsm8	chr6	18848579	18855751	+	74	62	79	67	83	85	72	71	8	13	21	26	7	33	12	34	15	23	84	83	61	48	39	55	37	68	65	66	62	70
Ankrd7_chr6_18866318_18879586_(+)	Ankrd7	chr6	18866318	18879586	+	1	0	1	0	1	0	0	0	2	1	1	0	0	0	0	0	0	0	1	0	0	0	2	0	4	0	0	0	2	1
Gm43498_chr6_18882711_18884196_(+)	Gm43498	chr6	18882711	18884196	+	0	0	0	0	0	0	0	0	0	0	0	0	0	0	0	0	0	0	0	0	0	0	0	0	0	0	0	0	0	0
Gm22718_chr6_19046837_19047151_(+)	Gm22718	chr6	19046837	19047151	+	0	0	0	0	0	0	0	0	0	0	0	0	0	0	0	0	0	0	0	0	0	0	0	0	0	0	0	0	0	0
Gm6655_chr6_19119469_19120777_(+)	Gm6655	chr6	19119469	19120777	+	0	0	0	0	0	0	0	0	0	0	0	0	0	0	0	0	0	0	0	0	0	0	0	0	0	0	0	0	0	0
4930524B17Rik_chr6_19247899_19278843_(-)	4930524B17Rik	chr6	19247899	19278843	-	0	0	0	0	0	0	0	0	0	0	0	0	0	0	0	0	0	0	0	0	0	1	0	0	0	0	0	0	0	0
Eif3s6-ps4_chr6_19317215_19319378_(-)	Eif3s6-ps4	chr6	19317215	19319378	-	0	0	3	0	0	0	1	0	0	0	1	0	0	0	2	0	1	0	2	0	1	0	2	0	1	0	1	1	4	0
Gm24213_chr6_19341329_19341586_(-)	Gm24213	chr6	19341329	19341586	-	0	0	0	0	0	0	0	0	0	0	0	0	0	0	0	0	0	0	0	0	0	0	0	0	0	0	0	0	0	0
Mir6370_chr6_19555342_19555461_(+)	Mir6370	chr6	19555342	19555461	+	0	0	0	0	0	0	0	0	0	0	0	0	0	0	0	0	0	0	0	0	0	0	0	0	0	0	0	0	0	0
Gm22828_chr6_19624609_19624715_(+)	Gm22828	chr6	19624609	19624715	+	0	0	0	0	0	0	0	0	0	0	0	0	0	0	0	0	0	0	0	0	0	0	0	0	0	0	0	0	0	0
Gm18482_chr6_19773955_19777545_(-)	Gm18482	chr6	19773955	19777545	-	0	0	0	0	0	0	0	0	0	0	0	0	0	0	0	0	0	0	0	0	0	0	0	0	0	0	0	0	0	0
Gm43501_chr6_19784686_19784792_(+)	Gm43501	chr6	19784686	19784792	+	0	0	0	0	0	0	0	0	0	0	0	0	0	0	0	0	0	0	0	0	0	0	0	0	0	0	0	0	0	0
Gm42581_chr6_19788053_19789018_(+)	Gm42581	chr6	19788053	19789018	+	0	0	0	0	0	0	0	0	0	0	0	0	0	0	0	0	0	0	0	0	0	0	0	0	0	0	0	0	1	0
Gm19102_chr6_20970438_20970990_(-)	Gm19102	chr6	20970438	20970990	-	0	0	0	0	0	0	0	0	0	0	0	0	0	0	0	0	0	0	0	0	0	0	0	0	0	0	0	0	0	0
Gm23960_chr6_21013112_21013242_(-)	Gm23960	chr6	21013112	21013242	-	0	0	0	0	0	0	0	0	0	0	0	0	0	0	0	0	0	0	0	0	0	0	0	0	0	0	0	0	0	0
Gm26373_chr6_21128156_21128258_(+)	Gm26373	chr6	21128156	21128258	+	0	0	0	0	0	0	0	0	0	0	0	0	0	0	0	0	0	0	0	0	0	0	0	0	0	0	0	0	0	0
Kcnd2_chr6_21215503_21729805_(+)	Kcnd2	chr6	21215503	21729805	+	33	24	62	46	81	67	53	37	12	17	21	39	28	51	16	33	13	29	55	88	33	42	30	78	27	88	54	88	22	42
Gm42583_chr6_21258921_21265620_(+)	Gm42583	chr6	21258921	21265620	+	1	1	0	2	2	2	4	0	0	1	2	1	0	2	2	2	1	0	2	2	1	2	0	0	1	1	1	2	0	2
Gm42584_chr6_21491661_21491880_(+)	Gm42584	chr6	21491661	21491880	+	0	0	0	0	0	0	0	0	0	0	0	0	0	0	0	0	0	0	0	0	0	0	0	0	0	0	0	0	0	0
5330437M03Rik_chr6_21681301_21685383_(+)	5330437M03Rik	chr6	21681301	21685383	+	0	0	0	0	0	0	0	0	0	0	0	0	0	0	0	0	0	0	0	0	0	0	0	0	0	0	0	0	0	0
Tspan12_chr6_21771395_21852515_(-)	Tspan12	chr6	21771395	21852515	-	25	9	29	11	42	6	34	10	12	3	5	5	9	5	11	3	5	7	14	5	11	9	26	18	18	7	9	4	19	4
Gm30270_chr6_21852418_21853483_(+)	Gm30270	chr6	21852418	21853483	+	0	0	0	0	0	0	0	0	0	0	0	0	0	0	0	0	0	0	0	0	0	0	0	0	0	0	0	0	0	0
Gm3289_chr6_21852981_21858178_(-)	Gm3289	chr6	21852981	21858178	-	0	0	0	0	0	0	0	0	0	0	0	0	0	0	0	0	0	0	0	0	0	0	0	0	0	0	0	0	0	1
Ing3_chr6_21949571_21976038_(+)	Ing3	chr6	21949571	21976038	+	57	59	79	66	64	49	54	50	18	20	26	24	14	42	13	26	16	26	55	65	37	42	28	39	34	47	44	42	51	50
Cped1_chr6_21985916_22256404_(+)	Cped1	chr6	21985916	22256404	+	42	12	42	15	34	12	39	3	9	3	4	5	10	2	1	0	2	3	7	3	5	1	11	8	5	5	8	2	3	6
Gm42573_chr6_22245457_22245934_(-)	Gm42573	chr6	22245457	22245934	-	0	0	0	0	0	0	0	1	0	0	0	0	0	0	0	0	2	0	0	0	0	0	1	0	0	0	0	0	0	0
Wnt16_chr6_22288227_22298522_(+)	Wnt16	chr6	22288227	22298522	+	1	0	0	0	1	0	2	0	0	0	0	0	0	0	0	0	0	0	0	2	2	0	1	3	3	1	2	1	3	0
Fam3c_chr6_22306520_22356243_(-)	Fam3c	chr6	22306520	22356243	-	809	460	1158	810	965	653	672	448	254	276	475	339	376	319	359	329	310	268	482	458	519	465	514	630	530	558	382	394	535	513
Gm43630_chr6_22622918_22623693_(+)	Gm43630	chr6	22622918	22623693	+	0	0	0	0	0	0	0	0	0	0	0	0	0	0	0	0	0	0	0	0	0	0	0	0	0	0	0	0	0	0
Gm8927_chr6_22703436_22704416_(+)	Gm8927	chr6	22703436	22704416	+	0	0	0	0	0	0	1	0	0	0	0	0	0	0	0	1	0	0	0	0	0	0	0	0	0	0	1	0	0	0
Gm8930_chr6_22733733_22734500_(+)	Gm8930	chr6	22733733	22734500	+	0	0	0	0	0	0	0	0	0	0	0	0	0	0	0	0	0	0	0	0	0	0	0	0	0	0	0	0	0	0
Gm18861_chr6_22759399_22760584_(+)	Gm18861	chr6	22759399	22760584	+	0	0	0	0	0	0	0	0	0	0	0	0	0	0	0	0	0	0	0	0	0	0	0	0	0	0	0	0	0	0
Gm23961_chr6_22768106_22768202_(-)	Gm23961	chr6	22768106	22768202	-	0	0	0	0	0	0	0	0	0	0	0	0	0	0	0	0	0	0	0	0	0	0	0	0	0	0	0	0	0	0
Gm25942_chr6_22789818_22789927_(+)	Gm25942	chr6	22789818	22789927	+	0	0	0	0	0	0	0	0	0	0	0	0	0	0	0	0	0	0	0	0	0	0	0	0	0	0	0	0	0	0
Gm43629_chr6_22804626_22805329_(-)	Gm43629	chr6	22804626	22805329	-	0	0	0	0	0	0	0	0	0	0	0	0	0	0	0	0	0	0	0	0	0	0	0	0	0	0	0	0	0	0
Ptprz1_chr6_22875502_23052916_(+)	Ptprz1	chr6	22875502	23052916	+	59	49	51	33	63	45	43	10	17	17	20	16	28	26	25	12	18	17	73	60	51	34	43	60	36	45	41	66	40	31
Aass_chr6_23072173_23132986_(-)	Aass	chr6	23072173	23132986	-	23	9	45	7	71	9	23	5	5	9	13	12	18	5	58	17	19	9	45	21	65	26	30	15	37	26	27	18	36	31
Gm8945_chr6_23155936_23156620_(-)	Gm8945	chr6	23155936	23156620	-	0	0	0	0	0	0	0	0	0	0	0	0	0	0	0	0	0	0	0	0	0	0	0	0	0	0	0	0	0	0
Gm5989_chr6_23157985_23160061_(-)	Gm5989	chr6	23157985	23160061	-	1	0	1	0	0	1	0	1	0	0	0	0	0	0	0	0	0	0	4	6	7	2	0	0	3	0	7	2	5	5
Gm8950_chr6_23163376_23164090_(-)	Gm8950	chr6	23163376	23164090	-	0	0	0	0	0	0	0	0	0	0	0	0	0	0	0	0	0	0	0	0	0	0	0	0	0	0	0	0	0	0
Gm5301_chr6_23165341_23167414_(-)	Gm5301	chr6	23165341	23167414	-	0	0	0	0	0	0	0	0	0	0	0	0	0	0	0	0	0	0	0	0	0	0	0	0	0	0	0	0	0	0
Fezf1_chr6_23245044_23248362_(-)	Fezf1	chr6	23245044	23248362	-	0	0	0	0	0	0	0	0	0	0	0	0	0	0	0	0	0	0	0	0	0	0	0	0	0	0	0	0	0	0
C130093G08Rik_chr6_23251133_23253358_(+)	C130093G08Rik	chr6	23251133	23253358	+	0	0	0	0	0	0	0	0	0	0	0	0	0	0	0	0	0	0	0	0	0	0	0	0	0	0	0	0	0	0
Cadps2_chr6_23262773_23839421_(-)	Cadps2	chr6	23262773	23839421	-	151	47	182	69	300	76	258	48	52	26	87	36	59	41	13	10	13	17	18	15	14	5	51	31	35	28	23	21	18	9
Gm27959_chr6_23519746_23519856_(+)	Gm27959	chr6	23519746	23519856	+	0	0	0	0	0	0	0	0	0	0	0	0	0	0	0	0	0	0	0	0	0	0	0	0	0	0	0	0	0	0
Gm24217_chr6_23639824_23639956_(-)	Gm24217	chr6	23639824	23639956	-	0	0	0	0	0	0	0	0	0	0	0	0	0	0	0	0	0	0	0	0	0	0	0	0	0	0	0	0	0	0
Rnf133_chr6_23648869_23650305_(-)	Rnf133	chr6	23648869	23650305	-	0	0	0	0	0	0	0	0	0	0	0	0	0	0	0	0	0	0	0	1	0	0	0	0	0	0	0	0	0	0
Rnf148_chr6_23653898_23655136_(-)	Rnf148	chr6	23653898	23655136	-	0	0	0	0	0	0	0	0	0	0	0	0	0	0	0	0	0	0	0	0	0	0	0	0	0	0	0	0	0	0
Tas2r118_chr6_23969161_23970060_(-)	Tas2r118	chr6	23969161	23970060	-	0	0	0	0	0	0	0	0	0	0	0	0	0	0	0	0	0	0	0	0	0	0	0	0	0	0	0	0	0	0
Slc13a1_chr6_24088283_24168092_(-)	Slc13a1	chr6	24088283	24168092	-	0	0	2	7	1	3	1	0	0	0	0	0	1	0	0	0	0	0	0	2	0	0	0	0	0	1	0	1	0	0
Gm20706_chr6_24138341_24140363_(-)	Gm20706	chr6	24138341	24140363	-	0	0	0	0	0	0	0	0	0	0	0	0	0	0	0	0	0	0	0	0	0	0	0	0	0	0	0	0	0	0
Gm26386_chr6_24143368_24143468_(+)	Gm26386	chr6	24143368	24143468	+	0	0	0	0	0	0	0	0	0	0	0	0	0	0	0	0	0	0	0	0	0	0	0	0	0	0	0	0	0	0
Iqub_chr6_24444865_24515067_(-)	Iqub	chr6	24444865	24515067	-	14	0	15	0	13	0	11	0	2	0	6	0	3	1	11	0	8	1	8	0	16	1	9	0	7	0	17	0	11	2
Ndufa5_chr6_24518666_24528013_(-)	Ndufa5	chr6	24518666	24528013	-	165	37	204	44	164	36	187	35	43	5	53	7	51	7	76	12	50	8	229	22	191	27	158	41	175	42	158	34	201	38
Asb15_chr6_24528144_24573164_(+)	Asb15	chr6	24528144	24573164	+	0	0	0	2	1	0	0	1	1	0	0	0	0	0	0	0	1	0	0	0	1	2	1	0	2	1	0	0	2	0
Gm42689_chr6_24594530_24595238_(+)	Gm42689	chr6	24594530	24595238	+	0	0	0	0	0	0	0	0	0	0	0	0	0	0	0	0	0	0	0	0	0	0	0	0	0	0	0	0	0	0
Lmod2_chr6_24597762_24605414_(+)	Lmod2	chr6	24597762	24605414	+	0	0	0	0	0	0	0	0	0	0	0	0	0	0	0	0	0	0	0	0	0	0	0	0	0	0	0	0	0	0
Wasl_chr6_24613805_24665009_(-)	Wasl	chr6	24613805	24665009	-	338	77	334	73	375	99	298	83	110	43	194	70	160	67	173	86	121	41	352	95	305	82	261	110	261	107	295	86	294	110
Gm42856_chr6_24657518_24660369_(-)	Gm42856	chr6	24657518	24660369	-	37	0	51	0	66	0	55	0	20	0	30	0	41	0	27	0	20	0	54	0	60	0	47	0	43	0	35	0	57	0
Hyal6_chr6_24733245_24745452_(+)	Hyal6	chr6	24733245	24745452	+	0	0	0	0	0	0	1	0	0	0	0	0	0	0	0	0	0	0	0	0	0	0	0	0	0	0	0	0	0	0
Hyal4_chr6_24748329_24767662_(+)	Hyal4	chr6	24748329	24767662	+	0	0	1	0	1	0	1	1	0	0	0	0	0	1	0	0	0	0	0	0	0	0	0	0	0	0	0	0	1	0
Spam1_chr6_24791188_24801048_(+)	Spam1	chr6	24791188	24801048	+	0	0	0	0	0	0	0	0	0	0	0	0	0	0	0	0	0	0	0	0	0	0	0	0	0	0	0	0	0	0
Gm18327_chr6_24837294_24838123_(+)	Gm18327	chr6	24837294	24838123	+	0	0	0	0	0	0	0	0	0	0	0	0	0	0	0	0	0	0	0	0	0	0	0	0	0	0	0	0	0	0
Hyal5_chr6_24857997_24891958_(+)	Hyal5	chr6	24857997	24891958	+	0	0	0	2	0	0	0	0	0	0	0	0	0	3	0	0	0	1	0	1	0	0	0	0	0	0	1	0	0	0
Gm22267_chr6_24894670_24894800_(-)	Gm22267	chr6	24894670	24894800	-	0	0	0	0	0	0	0	0	0	0	0	0	0	0	0	0	0	0	0	0	0	0	0	0	0	0	0	0	0	0
Tmem229a_chr6_24951141_24956297_(-)	Tmem229a	chr6	24951141	24956297	-	8	3	10	3	4	1	1	0	0	1	1	0	0	0	0	1	0	0	1	0	0	0	1	0	0	0	0	1	1	1
Gm5302_chr6_25046503_25047298_(-)	Gm5302	chr6	25046503	25047298	-	0	0	0	0	0	0	0	0	0	0	0	0	0	0	0	0	0	0	0	0	0	0	0	1	0	0	0	0	0	0
Gm24443_chr6_25078772_25078903_(-)	Gm24443	chr6	25078772	25078903	-	0	0	0	0	0	0	0	0	0	0	0	0	0	0	0	0	0	0	0	0	0	0	0	0	0	0	0	0	0	0
Gm22529_chr6_25199929_25200051_(-)	Gm22529	chr6	25199929	25200051	-	0	0	0	0	0	0	0	0	0	0	0	0	0	0	0	0	0	0	0	0	0	0	0	0	0	0	0	0	0	0
Gpr37_chr6_25665878_25690729_(-)	Gpr37	chr6	25665878	25690729	-	0	0	0	0	0	0	0	0	0	0	0	0	0	0	0	0	0	0	0	0	0	0	0	0	0	0	0	0	0	0
Pot1a_chr6_25743737_25809246_(-)	Pot1a	chr6	25743737	25809246	-	382	132	331	154	327	127	331	144	85	45	107	75	88	79	159	133	80	67	280	167	294	163	187	141	196	168	238	164	278	182
Gm20756_chr6_25931426_25977227_(+)	Gm20756	chr6	25931426	25977227	+	0	0	0	1	2	0	0	0	0	0	0	0	0	0	0	0	0	0	1	0	2	0	2	1	0	1	1	0	0	1
Gm6719_chr6_25976747_25977081_(-)	Gm6719	chr6	25976747	25977081	-	0	0	0	0	0	0	0	0	0	0	0	0	0	0	0	0	0	0	0	0	0	0	0	0	0	0	0	0	0	0
Gm24691_chr6_26460291_26460430_(-)	Gm24691	chr6	26460291	26460430	-	0	0	0	0	0	0	0	0	0	0	0	0	0	0	0	0	0	0	0	0	0	0	0	0	0	0	0	0	0	0
Gm42474_chr6_26830417_26831158_(+)	Gm42474	chr6	26830417	26831158	+	0	0	0	0	0	0	0	0	0	0	0	0	0	0	0	0	0	0	0	0	0	0	0	0	0	0	0	0	0	0
Grm8_chr6_27275119_28135178_(-)	Grm8	chr6	27275119	28135178	-	78	8	166	7	181	8	152	6	38	6	55	7	51	7	64	0	51	1	191	4	119	1	98	5	87	3	134	4	127	3
Gm42801_chr6_27441089_27443953_(-)	Gm42801	chr6	27441089	27443953	-	0	0	0	0	0	0	2	0	0	0	0	0	1	0	0	0	0	0	3	0	0	0	0	0	1	0	2	0	0	0
Gm26310_chr6_27668087_27668203_(+)	Gm26310	chr6	27668087	27668203	+	0	0	0	0	0	0	0	0	0	0	0	0	0	0	0	0	0	0	0	0	0	0	0	0	0	0	0	0	0	0
Mir592_chr6_27936655_27936750_(-)	Mir592	chr6	27936655	27936750	-	0	0	0	0	0	0	0	0	0	0	0	0	0	0	0	0	0	0	0	0	0	0	0	0	0	0	0	0	0	0
Gm42547_chr6_28211008_28214805_(-)	Gm42547	chr6	28211008	28214805	-	13	14	13	12	8	9	16	11	3	4	6	8	3	7	2	7	5	5	3	14	17	13	2	11	10	14	9	15	12	21
6530409C15Rik_chr6_28215555_28260862_(+)	6530409C15Rik	chr6	28215555	28260862	+	0	2	2	0	1	0	3	2	0	0	0	2	1	1	0	0	0	0	0	1	0	0	0	1	0	1	1	0	0	0
Gm42549_chr6_28219167_28226170_(-)	Gm42549	chr6	28219167	28226170	-	24	12	12	2	14	1	12	2	6	6	5	4	5	6	3	6	2	7	12	7	11	5	9	11	3	6	8	8	7	10
Gm42548_chr6_28233081_28237013_(-)	Gm42548	chr6	28233081	28237013	-	23	2	16	0	25	2	34	0	12	2	19	0	8	2	7	0	9	0	12	1	19	1	15	2	15	1	19	0	24	3
Zfp800_chr6_28239927_28398005_(-)	Zfp800	chr6	28239927	28398005	-	70	37	66	18	99	45	56	30	13	10	28	13	15	15	22	16	14	17	37	35	30	27	23	13	18	20	36	17	38	21
Gm5303_chr6_28361914_28363165_(-)	Gm5303	chr6	28361914	28363165	-	0	0	0	0	0	0	0	0	0	0	0	0	0	0	0	0	0	0	0	0	0	0	0	0	0	0	0	0	0	0
Gcc1_chr6_28416091_28428390_(-)	Gcc1	chr6	28416091	28428390	-	22	8	33	10	32	14	26	9	7	2	13	1	15	3	12	3	7	1	25	10	16	9	17	13	28	10	16	14	17	15
Arf5_chr6_28423560_28426602_(+)	Arf5	chr6	28423560	28426602	+	7	2	6	1	19	3	8	0	8	0	10	0	6	1	7	2	4	1	35	3	41	1	22	1	27	3	25	3	42	2
Fscn3_chr6_28427789_28438622_(+)	Fscn3	chr6	28427789	28438622	+	3	0	1	0	0	0	1	0	2	0	0	0	0	0	0	0	0	0	1	0	0	0	0	0	0	1	1	0	1	0
Pax4_chr6_28442334_28449353_(-)	Pax4	chr6	28442334	28449353	-	0	0	0	0	0	0	0	0	0	0	0	0	0	0	0	0	0	0	0	0	0	0	1	0	0	0	0	0	0	0
Gm43264_chr6_28465565_28466981_(-)	Gm43264	chr6	28465565	28466981	-	0	0	0	0	0	0	0	0	0	0	0	0	0	0	0	0	0	0	0	0	0	0	0	0	0	0	0	0	0	0
Snd1_chr6_28475139_28935162_(+)	Snd1	chr6	28475139	28935162	+	2521	733	2377	694	1931	572	2078	657	930	399	1373	542	1035	504	1302	620	947	454	2270	921	1870	745	1633	777	1651	821	1951	777	1897	748
Gm37321_chr6_28563490_28565361_(+)	Gm37321	chr6	28563490	28565361	+	9	7	6	1	6	4	9	4	2	3	1	3	6	2	2	3	1	3	6	11	5	5	0	11	3	6	4	8	6	6
Gm37978_chr6_28568072_28570986_(+)	Gm37978	chr6	28568072	28570986	+	20	8	22	4	17	11	23	8	10	2	12	7	17	6	4	9	8	5	30	13	16	10	20	11	16	5	22	15	18	9
Lrrc4_chr6_28661831_28831747_(-)	Lrrc4	chr6	28661831	28831747	-	7	0	0	2	6	2	4	0	2	5	2	1	3	1	4	2	7	1	2	1	1	2	4	0	0	2	1	0	0	0
Gm37940_chr6_28796463_28799713_(+)	Gm37940	chr6	28796463	28799713	+	51	15	45	8	42	8	34	15	17	10	33	8	15	7	23	10	25	10	37	16	31	9	34	19	28	19	24	11	40	13
Gm3294_chr6_28981634_29028922_(+)	Gm3294	chr6	28981634	29028922	+	3	0	5	2	1	0	2	0	2	0	0	1	3	2	7	3	2	1	11	5	12	2	4	4	9	2	7	1	9	3
Mir129-1_chr6_29022619_29022691_(+)	Mir129-1	chr6	29022619	29022691	+	0	0	0	0	0	0	0	0	0	0	0	0	0	0	0	0	0	0	0	0	0	0	0	0	0	0	0	0	0	0
Lep_chr6_29060220_29073877_(+)	Lep	chr6	29060220	29073877	+	0	0	0	0	0	0	0	0	0	0	0	0	0	0	0	0	0	0	0	0	0	0	0	0	0	0	0	0	0	0
Gm25589_chr6_29113441_29113606_(-)	Gm25589	chr6	29113441	29113606	-	0	0	0	0	0	0	0	0	0	0	0	0	0	0	0	0	0	0	0	0	0	0	0	0	0	0	0	0	0	0
Rbm28_chr6_29123576_29165006_(-)	Rbm28	chr6	29123576	29165006	-	664	156	570	167	566	171	640	142	192	48	253	51	218	73	310	79	251	73	734	197	697	147	643	174	582	176	604	125	659	150
Gm24303_chr6_29150554_29150679_(-)	Gm24303	chr6	29150554	29150679	-	0	0	0	0	0	0	0	0	0	0	0	0	0	0	0	0	1	0	0	0	0	0	0	0	0	0	0	0	0	0
Prrt4_chr6_29169232_29179584_(-)	Prrt4	chr6	29169232	29179584	-	14	4	8	3	5	6	5	7	1	1	4	1	4	3	8	2	6	3	8	3	11	3	4	4	4	2	2	4	7	2
Impdh1_chr6_29200434_29216364_(-)	Impdh1	chr6	29200434	29216364	-	265	114	226	104	257	107	318	143	58	45	76	36	62	42	131	72	77	62	254	93	207	99	196	98	207	117	168	67	200	98
Gm26021_chr6_29234434_29234564_(+)	Gm26021	chr6	29234434	29234564	+	0	0	0	0	0	0	0	0	0	0	0	0	0	0	0	0	0	0	0	0	0	0	0	0	0	0	0	0	0	0
Hilpda_chr6_29272488_29275446_(+)	Hilpda	chr6	29272488	29275446	+	12	18	17	18	13	19	16	25	4	7	0	4	1	7	1	14	1	11	19	26	11	16	11	14	5	28	8	17	15	34
Fam71f2_chr6_29279593_29290680_(+)	Fam71f2	chr6	29279593	29290680	+	0	0	2	1	0	0	5	1	0	0	2	0	0	2	2	0	2	1	3	0	3	0	0	0	1	1	2	0	4	1
Fam71f1_chr6_29319140_29336019_(+)	Fam71f1	chr6	29319140	29336019	+	1	1	2	0	2	0	2	0	1	0	1	0	0	0	1	0	0	1	0	1	1	1	0	0	3	0	0	2	1	0
Gm17172_chr6_29322804_29323206_(-)	Gm17172	chr6	29322804	29323206	-	0	0	0	0	0	0	0	0	0	0	0	0	0	0	0	0	0	0	0	0	0	0	0	0	0	0	0	0	0	0
Calu_chr6_29348069_29377110_(+)	Calu	chr6	29348069	29377110	+	676	204	717	258	626	187	743	252	190	101	268	128	204	115	324	147	196	106	602	224	625	221	426	174	472	204	514	166	660	220
Opn1sw_chr6_29376671_29388468_(-)	Opn1sw	chr6	29376671	29388468	-	0	2	0	2	0	0	0	0	0	0	0	1	0	0	2	1	1	1	2	0	0	1	0	0	0	1	0	0	0	0
Ccdc136_chr6_29396309_29426994_(+)	Ccdc136	chr6	29396309	29426994	+	53	22	26	15	43	24	54	30	25	34	44	20	21	25	53	69	39	49	97	60	96	71	59	49	78	80	81	56	108	65
Gm26220_chr6_29396617_29396705_(+)	Gm26220	chr6	29396617	29396705	+	0	0	0	0	0	0	0	0	0	0	0	0	0	0	0	0	0	0	0	0	0	0	0	0	0	0	0	0	0	0
Gm44354_chr6_29397434_29397576_(-)	Gm44354	chr6	29397434	29397576	-	0	0	0	0	0	0	0	0	0	0	0	0	0	0	0	0	0	0	0	0	0	0	0	0	0	0	0	0	0	0
Flnc_chr6_29433256_29461883_(+)	Flnc	chr6	29433256	29461883	+	405	104	214	50	217	48	139	30	92	38	96	39	73	24	78	30	39	34	125	44	114	40	113	53	148	83	70	14	81	34
Atp6v1f_chr6_29467718_29470512_(+)	Atp6v1f	chr6	29467718	29470512	+	94	32	98	27	95	30	95	24	23	7	13	12	13	10	55	16	38	13	98	26	113	19	83	22	66	23	77	9	119	20
Atp6v1fnb_chr6_29471437_29473465_(+)	Atp6v1fnb	chr6	29471437	29473465	+	0	0	3	1	1	0	1	1	0	0	2	0	0	0	0	0	1	0	1	1	0	0	1	0	0	0	0	0	0	0
Kcp_chr6_29473162_29507952_(-)	Kcp	chr6	29473162	29507952	-	9	2	0	1	6	0	3	2	4	0	3	2	5	1	4	1	6	1	21	5	19	4	11	4	11	6	16	9	20	6
Gm26484_chr6_29487717_29487822_(-)	Gm26484	chr6	29487717	29487822	-	0	0	0	0	0	0	0	0	0	0	0	0	0	0	0	0	0	0	0	0	0	0	0	0	0	0	0	0	0	0
Gm26627_chr6_29507725_29509698_(+)	Gm26627	chr6	29507725	29509698	+	0	0	0	0	0	0	0	0	0	0	0	0	0	0	0	0	0	0	0	2	0	0	0	0	0	0	0	0	0	0
Irf5_chr6_29526625_29541871_(+)	Irf5	chr6	29526625	29541871	+	3	3	3	1	2	2	3	0	1	1	0	0	3	0	1	1	1	1	8	2	6	2	3	3	4	2	5	1	4	3
Tnpo3_chr6_29540827_29609887_(-)	Tnpo3	chr6	29540827	29609887	-	476	383	503	347	478	370	508	339	184	155	252	200	246	184	302	247	205	178	510	392	468	346	390	357	391	384	424	345	444	394
Gm43029_chr6_29546604_29548138_(-)	Gm43029	chr6	29546604	29548138	-	11	10	11	7	9	12	10	14	3	6	9	5	5	11	2	9	7	4	13	14	7	7	11	7	10	6	10	5	6	8
Tspan33_chr6_29694222_29718559_(+)	Tspan33	chr6	29694222	29718559	+	23	6	20	7	23	12	12	6	10	4	19	13	9	6	21	21	13	15	16	13	27	21	19	12	30	24	31	19	27	16
Smo_chr6_29735503_29761365_(+)	Smo	chr6	29735503	29761365	+	63	72	38	39	58	35	38	22	26	34	40	48	29	37	35	41	25	40	25	21	34	24	31	37	36	50	30	27	35	40
Gm13717_chr6_29750761_29751125_(+)	Gm13717	chr6	29750761	29751125	+	1	3	0	1	0	0	2	0	1	0	0	1	0	0	0	0	0	2	0	0	1	0	0	2	1	1	0	0	0	3
Ahcyl2_chr6_29768011_29912310_(+)	Ahcyl2	chr6	29768011	29912310	+	269	121	262	108	289	129	226	89	144	83	237	111	179	106	215	130	185	98	363	249	350	180	314	186	280	181	350	191	401	184
4930528J11Rik_chr6_29912023_29915633_(-)	4930528J11Rik	chr6	29912023	29915633	-	0	0	0	0	0	0	0	0	0	0	0	0	0	0	0	0	0	0	0	0	0	0	0	0	0	0	0	0	0	0
Strip2_chr6_29917012_29959681_(+)	Strip2	chr6	29917012	29959681	+	7	2	12	1	4	3	10	3	3	1	5	2	2	0	4	7	7	0	15	7	16	11	8	3	8	2	12	4	12	6
Gm13724_chr6_29960993_29962147_(+)	Gm13724	chr6	29960993	29962147	+	0	0	0	0	0	0	0	0	0	0	0	0	0	0	0	0	0	0	0	0	0	0	0	0	0	0	0	0	0	0
Gm24536_chr6_29963555_29963661_(+)	Gm24536	chr6	29963555	29963661	+	0	0	0	0	0	0	0	0	0	0	0	0	0	0	0	0	0	0	0	0	0	0	0	0	0	0	0	0	0	0
Gm13725_chr6_29963644_29963850_(+)	Gm13725	chr6	29963644	29963850	+	0	0	0	0	0	0	0	0	0	0	0	0	0	0	0	0	0	0	0	0	0	0	0	0	0	0	0	0	0	0
Smkr-ps_chr6_29985235_29993778_(+)	Smkr-ps	chr6	29985235	29993778	+	3	0	6	0	1	0	0	0	0	0	0	0	0	0	0	0	1	0	1	0	3	1	2	0	1	0	7	1	0	1
Gm23049_chr6_29988388_29988489_(+)	Gm23049	chr6	29988388	29988489	+	0	0	0	0	0	0	0	0	0	0	0	0	0	0	0	0	0	0	0	0	0	0	0	0	0	0	0	0	0	0
Nrf1_chr6_30047988_30153458_(+)	Nrf1	chr6	30047988	30153458	+	730	225	770	214	698	206	628	214	354	124	485	171	502	163	413	162	346	130	829	276	535	179	723	233	682	279	677	214	633	202
Gm25580_chr6_30143801_30144127_(-)	Gm25580	chr6	30143801	30144127	-	0	0	0	0	0	0	0	0	0	0	0	0	0	0	0	0	0	0	0	0	1	0	0	1	0	0	0	0	0	0
Mir182_chr6_30165918_30165992_(-)	Mir182	chr6	30165918	30165992	-	0	0	0	0	0	0	0	0	0	0	0	0	0	0	0	0	0	0	0	0	0	0	0	0	0	0	0	0	0	0
Mir96_chr6_30169446_30169551_(-)	Mir96	chr6	30169446	30169551	-	0	0	0	0	2	0	0	0	0	0	0	0	0	1	1	0	0	0	1	0	1	0	0	0	1	0	6	0	0	0
Mir183_chr6_30169668_30169737_(-)	Mir183	chr6	30169668	30169737	-	0	0	0	1	0	1	3	1	0	0	0	1	0	0	0	3	0	1	1	1	0	0	1	0	0	1	0	0	1	3
Rncr4_chr6_30172893_30175126_(+)	Rncr4	chr6	30172893	30175126	+	1	0	0	0	2	1	0	0	0	0	0	0	0	0	1	0	1	1	0	1	0	0	0	0	0	0	0	0	0	0
Ube2h_chr6_30211289_30304539_(-)	Ube2h	chr6	30211289	30304539	-	405	118	375	116	369	103	286	72	222	105	336	143	240	93	380	189	225	113	353	150	346	174	293	135	374	197	354	143	410	189
1700095J07Rik_chr6_30304605_30331779_(+)	1700095J07Rik	chr6	30304605	30331779	+	1	0	0	0	0	0	1	0	0	0	0	0	0	0	1	1	1	0	1	0	2	0	0	0	0	0	4	0	2	0
Gm25625_chr6_30347371_30347466_(-)	Gm25625	chr6	30347371	30347466	-	0	0	0	0	0	0	0	0	0	0	0	0	0	0	0	0	0	0	0	0	0	0	0	0	0	0	0	0	0	0
Zc3hc1_chr6_30366380_30391028_(-)	Zc3hc1	chr6	30366380	30391028	-	156	56	202	47	167	41	171	57	51	15	73	26	51	22	99	21	59	27	158	54	145	55	144	45	117	70	124	41	158	48
n-R5s161_chr6_30379101_30379214_(+)	n-R5s161	chr6	30379101	30379214	+	0	0	0	0	0	0	0	0	0	0	0	0	0	0	0	0	0	0	0	0	0	0	0	0	0	0	0	0	0	0
Klhdc10_chr6_30401868_30455179_(+)	Klhdc10	chr6	30401868	30455179	+	363	97	292	65	297	72	333	92	201	45	269	62	218	66	278	59	214	65	441	101	407	94	381	104	410	108	374	96	425	89
1700012C14Rik_chr6_30460128_30463313_(+)	1700012C14Rik	chr6	30460128	30463313	+	1	0	1	0	4	3	0	0	1	0	0	0	0	0	0	0	0	0	0	1	0	0	2	1	0	0	2	0	0	0
Tmem209_chr6_30479053_30509783_(-)	Tmem209	chr6	30479053	30509783	-	613	169	623	146	461	166	394	143	133	65	203	78	179	91	252	109	167	78	406	162	454	179	322	134	337	175	314	123	454	168
Ssmem1_chr6_30509849_30520254_(+)	Ssmem1	chr6	30509849	30520254	+	2	1	2	3	1	0	2	1	0	0	2	0	1	0	0	0	2	0	0	0	0	1	0	1	1	0	1	0	0	0
Cpa2_chr6_30541582_30564476_(+)	Cpa2	chr6	30541582	30564476	+	7	1	1	4	11	1	4	1	2	1	4	0	0	4	2	0	0	2	5	2	9	1	6	3	6	1	4	1	3	1
Cpa4_chr6_30568369_30592418_(+)	Cpa4	chr6	30568369	30592418	+	0	0	0	0	1	0	0	0	0	0	0	0	0	0	0	0	0	0	0	0	0	0	0	0	0	0	0	0	0	0
Gm13781_chr6_30573153_30576035_(-)	Gm13781	chr6	30573153	30576035	-	0	0	0	0	0	0	0	0	0	0	0	0	0	0	0	0	0	0	0	0	0	0	0	0	0	0	0	0	0	0
Cpa5_chr6_30611010_30631745_(+)	Cpa5	chr6	30611010	30631745	+	0	0	0	0	0	0	0	0	0	0	0	0	0	0	0	0	0	0	0	0	0	0	0	0	0	0	0	0	0	0
Cpa1_chr6_30639218_30645363_(+)	Cpa1	chr6	30639218	30645363	+	0	0	0	0	0	0	0	0	0	0	0	0	0	0	0	0	0	0	0	0	0	0	0	0	0	0	0	0	0	0
Cep41_chr6_30653457_30693749_(-)	Cep41	chr6	30653457	30693749	-	51	21	56	21	42	16	60	31	13	14	17	16	13	11	28	6	11	13	62	29	64	37	45	34	56	37	56	28	50	46
Gm13782_chr6_30673944_30682266_(+)	Gm13782	chr6	30673944	30682266	+	0	0	0	0	0	0	0	0	0	0	0	0	0	0	0	0	0	0	0	0	0	0	0	0	0	0	0	0	0	0
Gm14528_chr6_30719873_30720103_(+)	Gm14528	chr6	30719873	30720103	+	0	0	0	0	0	0	0	0	0	0	0	0	0	0	0	0	0	0	0	0	0	0	0	0	0	0	0	0	0	0
Mest_chr6_30723547_30748465_(+)	Mest	chr6	30723547	30748465	+	236	2	203	3	226	5	3	0	23	1	57	1	18	4	27	5	25	5	98	15	73	9	168	24	122	16	78	8	100	10
Gm27522_chr6_30734418_30734647_(+)	Gm27522	chr6	30734418	30734647	+	0	0	0	0	0	0	0	0	0	0	0	0	0	0	0	0	0	0	0	0	0	0	0	0	0	0	0	0	0	0
Gm44296_chr6_30735029_30735924_(-)	Gm44296	chr6	30735029	30735924	-	0	0	0	0	0	0	0	0	0	0	0	0	0	0	0	0	0	0	0	0	0	0	0	0	0	0	0	0	0	0
Gm27568_chr6_30735964_30736062_(+)	Gm27568	chr6	30735964	30736062	+	0	0	0	0	0	0	0	0	0	0	0	0	0	0	0	0	0	0	0	0	0	0	0	0	0	0	0	0	0	0
Mir335_chr6_30741299_30741396_(+)	Mir335	chr6	30741299	30741396	+	0	0	0	0	0	0	0	0	0	0	0	0	0	0	0	0	0	0	0	0	0	0	0	0	0	0	0	0	0	0
Copg2_chr6_30747554_30896794_(-)	Copg2	chr6	30747554	30896794	-	245	61	200	70	178	64	252	64	79	42	130	67	102	50	170	81	96	56	234	103	248	106	156	88	170	115	212	92	250	109
4930412F09Rik_chr6_30896899_30943470_(+)	4930412F09Rik	chr6	30896899	30943470	+	2	0	3	1	1	0	0	0	0	0	1	0	0	0	0	0	0	0	2	0	0	0	1	1	1	0	0	0	0	0
Tsga13_chr6_30896981_30915573_(-)	Tsga13	chr6	30896981	30915573	-	0	0	0	0	0	0	0	0	0	0	0	0	0	0	0	0	0	0	0	0	0	0	0	0	0	0	0	0	0	0
Klf14_chr6_30956023_30959078_(-)	Klf14	chr6	30956023	30959078	-	3	1	0	0	1	0	1	0	0	0	1	1	0	0	0	0	1	0	1	0	1	0	0	0	2	0	0	0	2	2
Mir29a_chr6_31062660_31062747_(-)	Mir29a	chr6	31062660	31062747	-	0	0	0	0	0	0	0	0	0	0	0	0	0	0	0	0	0	0	0	0	0	0	0	0	0	0	0	0	0	0
Mir29b-1_chr6_31063023_31063093_(-)	Mir29b-1	chr6	31063023	31063093	-	0	0	0	0	0	0	0	0	0	0	0	0	0	0	0	0	0	0	0	0	0	0	0	0	0	0	0	0	0	0
Gm27019_chr6_31063092_31063495_(-)	Gm27019	chr6	31063092	31063495	-	0	0	1	0	1	0	0	0	0	0	0	0	0	0	0	0	0	0	0	0	0	6	0	0	0	0	1	0	0	2
Lncpint_chr6_31082565_31220488_(-)	Lncpint	chr6	31082565	31220488	-	283	112	273	116	335	117	185	51	233	163	256	192	259	183	368	280	233	147	164	131	265	139	231	177	341	281	156	87	244	160
Gm13833_chr6_31102846_31104646_(+)	Gm13833	chr6	31102846	31104646	+	0	0	0	0	0	0	0	0	0	0	0	0	0	0	0	0	0	0	0	0	0	0	0	0	0	0	0	0	0	0
5330406M23Rik_chr6_31108827_31110920_(-)	5330406M23Rik	chr6	31108827	31110920	-	5	0	5	0	6	3	2	1	4	2	5	2	3	0	5	0	2	0	7	3	7	1	8	1	5	2	5	0	6	0
Gm13835_chr6_31141979_31142663_(-)	Gm13835	chr6	31141979	31142663	-	1	0	0	0	2	0	2	2	0	0	1	0	1	0	2	1	1	0	2	2	1	0	1	0	0	0	2	2	0	1
Gm37728_chr6_31145128_31147419_(-)	Gm37728	chr6	31145128	31147419	-	3	0	5	0	0	0	4	2	3	0	7	1	10	1	8	1	0	0	2	0	8	0	4	0	11	1	2	0	1	0
2210408F21Rik_chr6_31220351_31337404_(+)	2210408F21Rik	chr6	31220351	31337404	+	11	6	19	2	22	3	15	6	6	6	10	5	7	8	12	9	6	4	10	7	7	11	18	8	28	7	13	4	13	8
Gm43800_chr6_31288963_31291693_(+)	Gm43800	chr6	31288963	31291693	+	1	1	0	0	0	0	0	1	0	0	1	0	1	2	0	0	0	0	0	0	1	0	1	1	1	0	0	0	2	1
Gm14532_chr6_31356743_31372369_(+)	Gm14532	chr6	31356743	31372369	+	4	0	1	2	1	0	1	2	0	1	0	0	1	4	3	0	0	0	2	1	1	2	2	4	1	2	1	1	1	1
Mkln1os_chr6_31366885_31398773_(-)	Mkln1os	chr6	31366885	31398773	-	8	4	11	5	7	3	18	3	2	3	2	2	2	0	3	5	3	5	2	4	2	5	2	6	7	2	3	0	3	0
Gm13844_chr6_31372895_31383877_(+)	Gm13844	chr6	31372895	31383877	+	19	11	11	8	4	3	6	7	7	5	5	5	7	8	5	15	4	6	14	16	13	20	5	10	12	12	3	18	6	17
Mkln1_chr6_31398735_31516811_(+)	Mkln1	chr6	31398735	31516811	+	372	118	353	110	327	113	358	106	132	58	208	109	188	87	201	92	122	65	265	125	281	120	216	120	258	141	218	110	249	111
Podxl_chr6_31519488_31563981_(-)	Podxl	chr6	31519488	31563981	-	214	58	186	41	233	58	146	23	73	21	103	35	58	31	89	41	54	27	101	45	138	36	103	85	104	57	90	23	101	36
Gm6117_chr6_31574967_31576723_(+)	Gm6117	chr6	31574967	31576723	+	0	0	0	0	0	0	0	0	0	0	0	0	0	0	0	0	0	0	0	0	0	0	0	0	1	0	0	0	0	0
Gm43154_chr6_31605190_31798053_(+)	Gm43154	chr6	31605190	31798053	+	4	1	7	1	11	6	11	1	1	2	2	3	0	1	3	4	3	6	9	11	6	6	3	8	0	12	8	8	9	12
Gm13848_chr6_31658173_31666131_(-)	Gm13848	chr6	31658173	31666131	-	0	0	1	0	0	0	0	0	0	0	0	0	0	0	1	2	0	0	0	0	1	0	1	2	2	0	0	1	2	0
Gm43293_chr6_31702245_31706990_(-)	Gm43293	chr6	31702245	31706990	-	0	0	0	0	0	0	0	0	0	0	0	0	0	0	0	0	0	0	0	0	0	0	0	0	0	0	0	0	0	0
Gm13849_chr6_31786675_31922270_(+)	Gm13849	chr6	31786675	31922270	+	0	0	1	0	0	0	2	0	0	0	0	0	0	0	1	1	0	0	2	0	0	0	0	1	0	1	0	0	0	0
1700012A03Rik_chr6_32050246_32058921_(+)	1700012A03Rik	chr6	32050246	32058921	+	0	0	0	0	0	0	0	0	0	0	0	0	0	0	0	0	0	0	0	0	0	0	0	0	0	0	0	0	0	0
Gm13850_chr6_32112143_32113226_(+)	Gm13850	chr6	32112143	32113226	+	0	0	0	0	0	0	0	0	0	0	0	0	0	0	0	0	0	0	0	0	0	0	0	0	0	0	0	0	0	0
Plxna4_chr6_32144268_32588192_(-)	Plxna4	chr6	32144268	32588192	-	24	7	38	7	37	11	14	5	10	6	10	8	14	13	9	5	8	2	11	2	4	3	23	2	9	3	8	4	3	2
Plxna4os3_chr6_32303829_32316614_(+)	Plxna4os3	chr6	32303829	32316614	+	0	0	0	0	0	0	0	0	0	0	0	0	0	0	0	0	0	0	0	0	0	0	0	0	0	0	0	0	0	0
Plxna4os2_chr6_32451170_32454750_(+)	Plxna4os2	chr6	32451170	32454750	+	0	0	0	0	0	0	0	0	0	0	0	0	0	0	0	0	0	0	0	0	0	0	0	0	0	0	0	0	0	0
Plxna4os1_chr6_32511073_32515576_(+)	Plxna4os1	chr6	32511073	32515576	+	0	0	0	0	0	0	0	0	0	0	0	0	0	0	0	0	0	0	0	0	0	0	0	0	0	0	0	0	0	0
Gm13852_chr6_32610119_32610360_(+)	Gm13852	chr6	32610119	32610360	+	0	0	0	0	0	0	0	0	0	0	0	0	0	0	0	0	0	0	0	0	0	0	0	0	0	0	0	0	0	0
BC049739_chr6_32751629_32752288_(-)	BC049739	chr6	32751629	32752288	-	0	0	0	0	0	0	0	0	2	0	1	0	0	0	0	0	0	0	0	0	0	0	0	0	0	0	0	0	0	0
Chchd3_chr6_32790976_33060260_(-)	Chchd3	chr6	32790976	33060260	-	1416	487	1534	523	1232	445	1378	542	558	280	755	329	771	325	726	307	535	256	1570	586	1176	442	1271	580	1176	522	1327	504	1231	486
Gm14540_chr6_33038468_33043222_(+)	Gm14540	chr6	33038468	33043222	+	0	0	0	0	0	0	0	0	0	0	0	0	0	0	0	0	0	0	0	0	0	0	0	0	0	0	0	0	0	0
Gm42895_chr6_33039124_33042119_(-)	Gm42895	chr6	33039124	33042119	-	16	17	13	19	21	19	23	19	12	10	8	13	15	18	17	16	5	16	25	18	13	9	17	18	20	8	17	14	12	15
Gm22321_chr6_33088646_33088749_(-)	Gm22321	chr6	33088646	33088749	-	0	0	0	0	0	0	0	0	0	0	0	0	0	0	0	0	0	0	0	0	0	0	0	0	0	0	0	0	0	0
Gm1401_chr6_33247328_33248099_(-)	Gm1401	chr6	33247328	33248099	-	1	0	1	0	1	0	2	0	1	0	0	0	0	0	0	0	0	0	4	0	0	0	0	0	0	0	0	1	0	0
Exoc4_chr6_33249085_33973979_(+)	Exoc4	chr6	33249085	33973979	+	5116	1386	5073	1408	4873	1375	4650	1294	3494	918	4951	1419	4710	1440	5465	1651	3727	1126	5929	1804	5108	1622	5947	1895	6324	2086	5117	1535	5560	1636
Gm13854_chr6_33375111_33377446_(-)	Gm13854	chr6	33375111	33377446	-	0	0	0	0	0	0	0	0	0	0	0	0	0	0	0	0	0	0	0	0	0	0	0	0	0	0	0	0	0	0
Gm43168_chr6_33433008_33434619_(+)	Gm43168	chr6	33433008	33434619	+	16	2	13	5	5	4	5	3	6	6	11	9	8	6	12	7	7	5	7	6	8	6	17	15	12	9	5	4	10	6
Gm43164_chr6_33690027_33692154_(-)	Gm43164	chr6	33690027	33692154	-	0	0	0	0	0	0	0	0	0	0	1	0	0	1	1	0	1	1	0	0	0	0	0	0	0	0	0	0	0	0
Gm13853_chr6_33984989_33992411_(-)	Gm13853	chr6	33984989	33992411	-	0	0	0	0	0	0	0	0	0	0	0	0	0	0	0	0	0	0	1	0	0	0	1	0	1	0	0	0	0	1
Lrguk_chr6_34029448_34134034_(+)	Lrguk	chr6	34029448	34134034	+	66	27	84	21	64	22	63	22	19	12	31	14	48	18	45	11	35	19	56	25	62	23	54	28	80	34	44	19	56	30
Gm13856_chr6_34151929_34174235_(+)	Gm13856	chr6	34151929	34174235	+	0	0	0	0	0	0	0	0	0	1	0	0	1	0	0	0	0	0	0	0	0	0	0	0	0	0	0	0	0	0
Slc35b4_chr6_34153380_34177111_(-)	Slc35b4	chr6	34153380	34177111	-	155	35	163	33	157	33	165	31	48	6	45	20	46	11	43	18	48	12	127	38	114	19	75	24	115	35	93	35	92	22
Gm13855_chr6_34179232_34186392_(+)	Gm13855	chr6	34179232	34186392	+	0	0	0	0	0	0	0	0	0	0	0	0	1	0	0	0	0	0	0	0	0	0	0	0	0	0	0	0	0	0
Gm14546_chr6_34290265_34324249_(+)	Gm14546	chr6	34290265	34324249	+	4	3	4	4	1	0	1	1	2	0	0	3	2	4	2	8	1	1	0	3	0	1	1	3	2	1	1	1	2	0
Akr1b3_chr6_34302434_34317478_(-)	Akr1b3	chr6	34302434	34317478	-	635	319	503	227	557	245	469	239	77	67	82	85	79	96	89	88	76	62	366	261	259	224	248	253	214	254	279	219	291	262
Akr1b8_chr6_34354119_34368463_(+)	Akr1b8	chr6	34354119	34368463	+	51	8	43	10	44	14	40	16	8	4	4	6	3	4	15	12	5	5	32	20	37	15	23	11	13	18	24	20	27	23
Gm13859_chr6_34373691_34380789_(-)	Gm13859	chr6	34373691	34380789	-	2	0	5	0	4	0	3	0	3	0	3	0	1	0	9	0	2	0	1	0	6	0	10	0	5	0	6	1	9	0
Gm13858_chr6_34379467_34380445_(-)	Gm13858	chr6	34379467	34380445	-	1	0	0	0	1	0	1	0	0	0	0	0	0	0	1	0	1	0	0	0	0	0	0	0	0	0	0	0	0	0
Akr1b10_chr6_34384218_34396950_(+)	Akr1b10	chr6	34384218	34396950	+	61	5	52	3	56	5	43	7	10	8	23	8	14	3	22	7	19	8	29	10	50	14	26	7	33	14	31	5	42	14
Akr1b7_chr6_34412334_34423142_(+)	Akr1b7	chr6	34412334	34423142	+	1	0	0	1	2	2	0	2	1	1	1	2	0	1	0	1	0	2	1	1	1	1	1	0	2	0	0	0	1	2
Gm13857_chr6_34419396_34445436_(-)	Gm13857	chr6	34419396	34445436	-	2	0	1	0	2	1	3	0	0	0	0	0	0	0	1	0	1	0	3	0	1	0	1	2	4	0	0	2	2	1
Bpgm_chr6_34476207_34505613_(+)	Bpgm	chr6	34476207	34505613	+	84	22	78	20	92	22	84	19	16	6	28	9	15	6	35	12	23	7	48	17	41	13	47	24	56	25	51	17	68	20
Gm13860_chr6_34533553_34541387_(+)	Gm13860	chr6	34533553	34541387	+	0	0	0	0	0	0	1	0	0	0	0	0	0	0	0	0	0	0	0	0	0	0	0	0	0	0	0	0	0	0
Cald1_chr6_34598500_34775473_(+)	Cald1	chr6	34598500	34775473	+	683	292	783	269	553	187	343	133	265	126	328	156	194	143	179	112	139	116	137	95	128	95	187	123	285	201	125	101	152	104
Gm13861_chr6_34651354_34653894_(-)	Gm13861	chr6	34651354	34653894	-	0	0	0	0	0	0	0	0	0	0	0	0	0	0	0	0	1	0	0	0	0	0	0	0	0	0	0	0	0	0
Npn2_chr6_34726672_34726906_(-)	Npn2	chr6	34726672	34726906	-	0	0	0	0	0	0	1	0	0	0	0	0	0	0	0	0	0	0	0	0	0	0	0	0	0	0	0	0	0	0
Gm14547_chr6_34727221_34735389_(-)	Gm14547	chr6	34727221	34735389	-	0	0	0	0	0	0	0	0	0	0	0	0	0	0	1	0	0	0	0	0	0	0	0	0	0	0	0	0	0	0
Agbl3_chr6_34780432_34859459_(+)	Agbl3	chr6	34780432	34859459	+	15	0	14	2	12	1	12	1	3	2	5	1	3	3	7	4	3	1	15	1	9	3	9	1	16	4	13	3	14	6
Gm13864_chr6_34786679_34787463_(+)	Gm13864	chr6	34786679	34787463	+	0	0	0	0	1	0	0	0	1	0	0	0	1	0	0	0	0	0	0	0	1	0	0	0	0	0	1	0	0	0
Gm13862_chr6_34810631_34810827_(-)	Gm13862	chr6	34810631	34810827	-	0	0	0	0	0	0	0	0	0	0	0	0	0	0	0	0	0	0	0	0	0	0	0	0	0	0	0	0	0	0
Gm13863_chr6_34820204_34820899_(-)	Gm13863	chr6	34820204	34820899	-	0	0	0	0	0	0	0	0	0	0	0	0	0	0	0	0	0	0	0	0	0	0	0	0	0	0	0	0	0	0
Gm43748_chr6_34859705_34860937_(+)	Gm43748	chr6	34859705	34860937	+	0	0	0	0	0	0	0	0	0	0	0	0	0	0	0	0	0	0	0	0	0	0	0	0	0	0	0	0	0	0
Tmem140_chr6_34863146_34874946_(+)	Tmem140	chr6	34863146	34874946	+	3	0	8	2	2	1	2	0	0	1	1	1	1	1	9	6	3	2	8	5	8	3	3	2	4	6	6	1	4	5
Cyren_chr6_34871771_34878060_(-)	Cyren	chr6	34871771	34878060	-	22	32	21	21	24	24	19	29	11	8	17	21	3	14	9	29	4	16	15	30	20	39	17	31	14	44	14	26	21	44
Wdr91_chr6_34880426_34910876_(-)	Wdr91	chr6	34880426	34910876	-	121	49	168	52	159	58	140	63	71	34	94	46	70	38	138	100	98	43	177	92	211	88	127	77	163	86	150	54	224	101
Stra8_chr6_34920163_34939344_(+)	Stra8	chr6	34920163	34939344	+	27	7	5	3	9	8	25	7	4	1	5	1	10	0	24	22	14	4	48	39	55	30	7	4	16	13	43	18	54	32
Slc23a4_chr6_34945278_34988404_(-)	Slc23a4	chr6	34945278	34988404	-	21	5	21	13	23	4	25	7	5	1	11	6	5	4	11	5	15	8	22	10	13	9	15	10	12	10	21	8	15	3
Cnot4_chr6_35022065_35133724_(-)	Cnot4	chr6	35022065	35133724	-	609	162	617	154	607	204	620	163	295	89	408	146	455	159	515	152	368	104	823	247	636	172	765	225	768	242	667	172	689	208
Nup205_chr6_35177421_35247596_(+)	Nup205	chr6	35177421	35247596	+	836	280	867	279	813	292	786	275	312	102	421	139	383	108	454	182	317	99	779	302	751	257	728	292	721	292	604	234	812	289
Gm23435_chr6_35243595_35243750_(+)	Gm23435	chr6	35243595	35243750	+	0	0	0	0	0	0	0	0	0	0	0	0	0	0	0	0	0	0	0	0	0	0	0	0	0	0	0	0	0	0
1810058I24Rik_chr6_35252654_35263496_(+)	1810058I24Rik	chr6	35252654	35263496	+	147	42	151	40	150	41	175	48	60	21	73	30	42	21	76	22	51	21	162	61	166	55	121	56	140	53	150	61	167	57
Slc13a4_chr6_35267957_35308131_(-)	Slc13a4	chr6	35267957	35308131	-	10	4	8	3	7	3	4	5	1	1	5	2	0	5	8	13	5	8	7	17	4	9	4	7	7	19	6	6	11	16
Fam180a_chr6_35312668_35326141_(-)	Fam180a	chr6	35312668	35326141	-	1	0	0	0	0	0	0	0	0	0	0	0	1	0	0	0	0	0	1	0	0	0	0	0	0	0	0	0	0	0
1700065J11Rik_chr6_35330846_35336825_(+)	1700065J11Rik	chr6	35330846	35336825	+	0	0	0	0	2	1	1	0	0	1	0	0	0	0	0	0	0	1	1	0	0	0	0	0	0	0	0	0	0	0
Mtpn_chr6_35508906_35539888_(-)	Mtpn	chr6	35508906	35539888	-	342	153	381	139	316	158	302	129	89	36	120	70	85	64	115	60	77	27	262	146	299	149	217	130	216	153	217	130	277	140
Gm23053_chr6_35524543_35524638_(-)	Gm23053	chr6	35524543	35524638	-	0	0	0	0	0	0	0	0	0	0	0	0	0	0	0	0	0	0	0	0	0	0	0	0	0	0	0	0	0	0
Gm42931_chr6_35611089_35615669_(-)	Gm42931	chr6	35611089	35615669	-	0	0	0	0	0	0	0	0	0	0	0	0	0	0	0	0	0	0	0	0	0	0	0	0	0	0	0	0	0	0
Gm43442_chr6_35926711_35927124_(+)	Gm43442	chr6	35926711	35927124	+	0	0	0	0	0	0	0	0	0	0	0	0	0	0	0	0	0	0	0	0	0	0	0	0	0	0	0	0	0	0
Gm23273_chr6_35975330_35975464_(+)	Gm23273	chr6	35975330	35975464	+	0	0	0	0	0	0	0	0	0	0	0	0	0	0	0	0	0	0	0	0	0	0	0	0	0	0	0	0	0	0
Gm43443_chr6_36186707_36189099_(-)	Gm43443	chr6	36186707	36189099	-	0	0	0	0	0	0	0	0	0	0	0	0	0	0	0	0	0	0	0	0	0	0	0	0	0	0	0	0	0	0
9330158H04Rik_chr6_36209620_36390191_(-)	9330158H04Rik	chr6	36209620	36390191	-	0	0	0	0	0	0	0	0	0	0	0	0	0	0	0	0	0	0	0	0	0	0	0	0	0	0	0	0	0	0
Chrm2_chr6_36388084_36528414_(+)	Chrm2	chr6	36388084	36528414	+	2	0	3	0	4	3	2	0	0	0	0	0	1	0	1	0	0	0	1	0	0	0	1	1	0	0	1	0	0	1
Mir490_chr6_36421742_36421825_(+)	Mir490	chr6	36421742	36421825	+	0	0	0	0	0	0	0	0	0	0	0	0	0	0	0	0	0	0	0	0	0	0	0	0	0	0	0	0	0	0
Gm43441_chr6_36587777_36587981_(+)	Gm43441	chr6	36587777	36587981	+	0	0	0	0	0	0	0	0	0	0	0	0	0	0	0	0	0	0	0	0	0	0	0	0	0	0	0	0	0	0
Gm2189_chr6_36639838_36640266_(-)	Gm2189	chr6	36639838	36640266	-	1	0	0	0	0	0	0	0	0	0	0	0	0	0	0	0	0	0	0	0	0	0	0	0	0	0	0	0	0	0
Gm25111_chr6_36699397_36699543_(+)	Gm25111	chr6	36699397	36699543	+	0	0	0	0	0	0	0	0	0	0	0	0	0	0	0	0	0	0	0	0	0	0	0	0	0	0	0	0	0	0
Ptn_chr6_36714929_36810220_(-)	Ptn	chr6	36714929	36810220	-	24	16	22	19	24	25	6	13	5	10	1	11	6	16	1	3	0	5	2	9	1	1	3	20	3	5	4	6	4	10
Dgki_chr6_36846022_37300184_(-)	Dgki	chr6	36846022	37300184	-	155	71	181	53	194	71	146	40	61	44	91	61	74	64	86	69	50	42	71	47	66	41	193	136	143	126	47	36	72	42
1700111E14Rik_chr6_36937048_36985784_(+)	1700111E14Rik	chr6	36937048	36985784	+	0	1	0	6	0	8	0	3	0	0	0	0	0	0	0	5	0	0	0	2	0	2	1	1	0	2	0	7	0	1
Gm7452_chr6_36956802_36959888_(+)	Gm7452	chr6	36956802	36959888	+	0	5	0	8	0	2	0	7	0	3	0	5	0	1	0	7	0	2	0	18	0	1	0	9	0	7	0	12	0	16
Creb3l2_chr6_37327255_37442146_(-)	Creb3l2	chr6	37327255	37442146	-	98	29	97	30	84	20	90	17	56	33	71	49	49	32	77	53	64	37	77	55	115	49	55	35	99	67	68	44	92	53
Akr1d1_chr6_37530173_37568815_(+)	Akr1d1	chr6	37530173	37568815	+	0	0	0	0	1	0	0	0	0	0	0	0	0	0	0	0	0	0	0	0	0	0	0	0	0	0	0	0	0	0
Gm7463_chr6_37541414_37541960_(+)	Gm7463	chr6	37541414	37541960	+	0	0	0	0	0	0	0	0	0	0	0	0	0	0	0	0	0	0	0	0	0	0	0	0	0	0	0	0	0	0
Ybx1-ps2_chr6_37686239_37687195_(-)	Ybx1-ps2	chr6	37686239	37687195	-	6	9	5	5	1	4	6	4	5	3	5	7	2	7	6	5	5	2	1	2	5	4	1	3	1	5	2	3	3	6
Atp6v0c-ps2_chr6_37806086_37806550_(+)	Atp6v0c-ps2	chr6	37806086	37806550	+	1	0	1	0	1	0	1	0	1	0	1	0	2	0	3	0	1	0	2	0	1	0	3	0	1	0	4	0	1	0
Gm7492_chr6_37865840_37866564_(-)	Gm7492	chr6	37865840	37866564	-	0	0	0	0	0	0	0	0	0	0	0	0	0	0	0	0	0	0	0	0	0	0	0	0	0	0	0	0	0	0
Trim24_chr6_37870811_37966296_(+)	Trim24	chr6	37870811	37966296	+	561	121	654	135	513	114	617	126	254	67	342	98	327	95	448	117	302	85	708	177	562	141	468	124	567	179	586	165	558	171
Svopl_chr6_37983739_38046996_(-)	Svopl	chr6	37983739	38046996	-	2	0	1	0	1	1	1	0	1	0	1	0	1	0	4	0	2	0	4	0	3	3	0	1	3	2	2	0	2	0
Atp6v0a4_chr6_38048483_38124586_(-)	Atp6v0a4	chr6	38048483	38124586	-	43	3	39	0	33	1	58	9	16	4	31	7	12	2	121	16	40	3	156	21	161	31	62	11	100	8	106	14	170	24
Tmem213_chr6_38109255_38115809_(+)	Tmem213	chr6	38109255	38115809	+	0	0	0	0	3	0	1	0	1	0	0	0	0	0	1	0	0	0	1	0	1	0	0	0	0	1	0	0	1	0
Gm23231_chr6_38118383_38118486_(+)	Gm23231	chr6	38118383	38118486	+	0	0	0	0	0	0	0	0	0	0	0	0	0	0	0	0	0	0	0	0	0	0	0	0	0	0	0	0	0	0
D630045J12Rik_chr6_38123174_38254009_(-)	D630045J12Rik	chr6	38123174	38254009	-	238	61	227	68	239	66	272	86	109	37	158	63	96	49	169	64	97	67	264	97	225	91	184	81	198	96	241	78	286	92
Gm7504_chr6_38284526_38284949_(+)	Gm7504	chr6	38284526	38284949	+	0	0	0	0	0	0	0	0	1	0	0	0	0	0	0	0	0	0	0	0	0	0	0	0	0	0	0	0	0	0
Zc3hav1l_chr6_38287396_38299259_(-)	Zc3hav1l	chr6	38287396	38299259	-	98	28	111	31	115	29	128	48	30	8	30	18	22	6	32	11	23	16	64	25	70	32	47	18	41	25	55	25	82	29
Zc3hav1_chr6_38305286_38354603_(-)	Zc3hav1	chr6	38305286	38354603	-	366	308	338	335	245	232	322	383	144	130	131	211	155	229	257	325	143	223	520	663	444	556	245	339	334	511	488	653	496	537
Gm43578_chr6_38365232_38365902_(-)	Gm43578	chr6	38365232	38365902	-	0	0	0	0	0	0	0	0	0	0	0	0	0	0	0	0	0	0	1	0	1	0	0	0	0	1	0	0	1	0
Rpl30-ps1_chr6_38376807_38377154_(+)	Rpl30-ps1	chr6	38376807	38377154	+	0	0	0	0	0	0	0	0	0	0	0	0	0	0	0	0	0	0	0	0	0	0	0	0	0	0	0	0	0	0
Ttc26_chr6_38381469_38427647_(+)	Ttc26	chr6	38381469	38427647	+	71	11	56	9	53	10	71	12	29	10	35	3	19	5	39	8	29	5	78	13	69	13	57	17	72	17	51	8	87	16
Gm16563_chr6_38396267_38396689_(+)	Gm16563	chr6	38396267	38396689	+	0	0	1	0	1	0	0	0	0	0	0	0	0	0	0	0	0	0	0	0	1	2	1	0	0	0	0	0	1	0
Ubn2_chr6_38433950_38524825_(+)	Ubn2	chr6	38433950	38524825	+	295	102	323	110	281	99	237	92	153	51	177	83	190	55	262	81	190	72	350	127	329	115	284	121	308	158	320	97	344	110
Mir7670_chr6_38507325_38507393_(+)	Mir7670	chr6	38507325	38507393	+	0	0	0	0	0	0	0	0	0	0	0	0	0	0	0	0	0	0	0	0	0	0	0	0	0	0	0	0	0	0
Fmc1_chr6_38533502_38539449_(+)	Fmc1	chr6	38533502	38539449	+	32	15	22	25	21	17	37	21	5	7	9	6	3	6	11	3	3	4	12	15	16	12	8	14	16	20	15	7	19	12
Gm15697_chr6_38542303_38546074_(-)	Gm15697	chr6	38542303	38546074	-	3	0	0	1	0	0	5	0	1	0	0	1	0	1	0	0	0	1	1	0	1	0	0	0	2	1	2	0	0	1
Luc7l2_chr6_38551334_38609470_(+)	Luc7l2	chr6	38551334	38609470	+	1005	517	1041	505	1057	506	1110	544	407	219	738	379	558	304	831	418	467	252	1182	552	1281	638	996	567	1010	621	1123	561	1374	636
Klrg2_chr6_38625693_38637242_(-)	Klrg2	chr6	38625693	38637242	-	25	11	24	8	22	12	24	11	9	3	12	2	4	3	11	11	7	5	31	11	12	8	26	11	26	14	26	6	25	9
Clec2l_chr6_38663067_38680865_(+)	Clec2l	chr6	38663067	38680865	+	5	1	3	0	6	0	3	0	1	0	0	1	1	0	1	1	0	1	0	2	2	3	2	2	2	1	3	1	6	6
Hipk2_chr6_38694390_38876165_(-)	Hipk2	chr6	38694390	38876165	-	455	144	401	120	422	115	450	154	162	71	237	99	231	91	246	110	221	105	408	147	258	108	367	162	341	144	388	138	302	123
Tbxas1_chr6_38875404_39084585_(+)	Tbxas1	chr6	38875404	39084585	+	6	5	2	1	4	5	5	5	1	0	2	2	0	2	1	1	2	0	4	3	7	5	3	7	4	5	10	3	4	4
Gm42962_chr6_38917098_38984325_(-)	Gm42962	chr6	38917098	38984325	-	0	0	0	0	0	0	0	0	0	0	0	0	0	0	0	0	0	0	0	0	1	0	0	0	0	0	0	0	0	0
Gm23010_chr6_39013666_39013791_(+)	Gm23010	chr6	39013666	39013791	+	0	0	0	0	0	0	0	0	0	0	0	0	0	0	0	0	0	0	0	0	0	0	0	0	0	0	0	0	0	0
1700025N23Rik_chr6_39063878_39067598_(-)	1700025N23Rik	chr6	39063878	39067598	-	0	0	0	0	0	0	0	0	0	0	0	0	0	0	0	0	0	0	0	0	0	0	0	1	0	0	0	0	0	0
Parp12_chr6_39086410_39118349_(-)	Parp12	chr6	39086410	39118349	-	106	9	103	4	82	4	100	8	21	1	30	4	26	3	73	4	30	5	112	15	110	13	95	7	118	14	87	9	103	11
4930599N23Rik_chr6_39118473_39148312_(+)	4930599N23Rik	chr6	39118473	39148312	+	5	0	9	1	4	0	2	0	0	1	3	1	2	0	1	1	1	0	6	2	4	0	5	2	5	0	3	1	4	0
Gm42963_chr6_39125165_39126381_(-)	Gm42963	chr6	39125165	39126381	-	0	0	0	0	0	0	0	0	0	0	0	0	0	0	0	0	0	0	0	0	0	0	0	0	0	0	1	0	0	0
Kdm7a_chr6_39136623_39206789_(-)	Kdm7a	chr6	39136623	39206789	-	109	20	114	25	96	32	107	32	58	28	82	32	67	40	137	84	93	34	158	57	187	61	107	61	129	81	136	46	220	79
Gm49041_chr6_39207068_39207611_(+)	Gm49041	chr6	39207068	39207611	+	0	0	0	0	0	0	0	0	0	0	0	0	0	0	0	0	0	0	0	0	0	0	0	0	0	0	0	0	0	0
Gm43479_chr6_39240114_39242541_(+)	Gm43479	chr6	39240114	39242541	+	2	0	3	0	0	0	3	1	0	0	1	0	0	0	0	0	0	0	0	0	3	0	1	1	1	0	0	0	2	1
Gm26008_chr6_39265844_39265942_(-)	Gm26008	chr6	39265844	39265942	-	0	0	0	0	2	0	1	0	0	0	1	0	0	0	0	2	0	1	0	1	2	0	1	0	1	3	0	2	1	1
Slc37a3_chr6_39334773_39377675_(-)	Slc37a3	chr6	39334773	39377675	-	189	39	210	55	209	33	235	61	103	29	145	27	124	17	170	48	117	32	261	60	201	53	205	46	227	48	205	57	221	55
Rab19_chr6_39381175_39390380_(+)	Rab19	chr6	39381175	39390380	+	0	1	0	0	1	3	1	0	1	0	1	2	1	0	2	0	0	2	1	3	3	1	2	5	1	0	1	0	0	1
Mkrn1_chr6_39397804_39420462_(-)	Mkrn1	chr6	39397804	39420462	-	313	182	398	225	345	201	418	255	135	113	158	157	151	112	294	209	201	109	407	315	508	380	322	296	312	297	384	275	500	326
Gm10244_chr6_39419887_39421294_(+)	Gm10244	chr6	39419887	39421294	+	0	0	0	0	1	0	0	0	0	0	0	0	0	0	0	0	0	0	1	0	1	0	1	0	0	0	4	0	0	0
Gm25402_chr6_39422289_39422419_(-)	Gm25402	chr6	39422289	39422419	-	0	0	0	0	0	0	0	0	0	0	0	0	0	0	0	0	0	0	0	0	0	0	0	0	0	0	0	0	0	0
Dennd2a_chr6_39462378_39557867_(-)	Dennd2a	chr6	39462378	39557867	-	510	131	431	100	385	75	345	85	178	74	178	88	160	69	241	128	164	91	257	109	267	84	235	90	246	121	263	94	341	99
8030453O22Rik_chr6_39527513_39544486_(+)	8030453O22Rik	chr6	39527513	39544486	+	4	0	7	0	4	0	8	0	2	0	4	0	0	1	2	0	1	0	5	0	8	0	4	0	5	0	6	0	11	0
Adck2_chr6_39573873_39588769_(+)	Adck2	chr6	39573873	39588769	+	18	21	15	21	20	22	20	36	3	15	4	9	2	22	13	23	6	7	10	27	14	27	12	50	6	41	9	27	14	32
Gm16272_chr6_39584092_39592784_(-)	Gm16272	chr6	39584092	39592784	-	17	7	7	11	3	8	9	10	3	3	4	1	3	4	5	3	0	0	6	6	2	1	4	8	2	9	1	6	1	13
Gm42420_chr6_39585753_39596595_(+)	Gm42420	chr6	39585753	39596595	+	15	25	17	27	17	30	18	15	3	17	7	9	3	7	3	11	2	7	14	22	12	19	7	35	13	28	16	17	20	20
Ndufb2_chr6_39592574_39603382_(+)	Ndufb2	chr6	39592574	39603382	+	80	76	93	99	76	79	95	92	11	26	12	31	11	20	13	45	14	23	86	115	85	141	59	109	48	130	74	116	91	138
Braf_chr6_39603237_39725463_(-)	Braf	chr6	39603237	39725463	-	770	503	910	538	920	497	741	378	203	224	329	344	283	308	289	395	205	272	524	601	501	623	371	551	443	622	435	549	498	655
Fth-ps2_chr6_39653450_39653965_(-)	Fth-ps2	chr6	39653450	39653965	-	4	3	4	5	2	0	2	4	0	0	2	4	1	4	1	5	1	9	0	5	2	1	1	4	2	2	1	2	4	5
Mrps33_chr6_39801804_39810988_(-)	Mrps33	chr6	39801804	39810988	-	23	11	27	3	26	10	25	11	3	1	11	3	5	2	7	4	1	2	14	13	20	10	12	6	15	11	14	5	22	5
Gm7554_chr6_39828200_39828773_(-)	Gm7554	chr6	39828200	39828773	-	0	0	0	1	0	0	0	0	0	0	0	0	0	0	0	0	0	0	0	1	0	0	0	0	0	0	0	0	0	0
Gm7556_chr6_39843212_39844295_(-)	Gm7556	chr6	39843212	39844295	-	0	0	0	0	0	0	0	0	0	0	0	0	0	0	0	2	0	0	0	0	0	0	0	0	0	0	0	0	0	0
Tmem178b_chr6_39871461_40255150_(+)	Tmem178b	chr6	39871461	40255150	+	27	22	45	16	39	21	39	7	25	16	56	26	36	17	26	22	27	17	31	12	17	15	15	21	32	19	17	12	16	14
Gm26833_chr6_39871532_39871971_(-)	Gm26833	chr6	39871532	39871971	-	0	0	0	0	0	0	0	0	0	0	0	0	0	0	0	0	0	0	0	0	0	0	0	0	0	0	0	0	0	0
Gm37995_chr6_40026894_40028607_(+)	Gm37995	chr6	40026894	40028607	+	0	0	0	1	0	0	1	0	0	0	1	0	1	0	0	2	0	1	1	0	0	0	0	2	1	0	1	0	0	0
Gm37673_chr6_40098722_40101172_(+)	Gm37673	chr6	40098722	40101172	+	2	0	0	3	0	1	0	0	0	1	0	0	0	0	0	0	0	0	0	0	0	0	0	0	0	2	1	0	1	0
Gm26638_chr6_40118779_40129477_(+)	Gm26638	chr6	40118779	40129477	+	1	0	1	0	0	0	0	0	0	0	0	0	0	0	0	0	0	0	1	0	0	1	0	0	0	0	0	0	0	0
Gm26807_chr6_40203298_40209259_(-)	Gm26807	chr6	40203298	40209259	-	0	0	0	0	0	0	0	0	0	0	0	0	0	0	0	0	0	0	0	0	0	0	0	0	0	0	0	0	0	0
Gm37003_chr6_40226219_40229045_(+)	Gm37003	chr6	40226219	40229045	+	0	0	0	0	0	0	0	0	0	0	0	0	0	0	0	0	0	0	0	0	0	0	0	0	0	0	0	0	0	0
Agk_chr6_40325172_40396762_(+)	Agk	chr6	40325172	40396762	+	4	0	2	0	3	0	2	0	1	0	2	0	2	0	2	0	3	0	0	0	0	0	0	0	1	0	1	0	3	0
Dennd11_chr6_40401375_40436135_(-)	Dennd11	chr6	40401375	40436135	-	3	1	0	1	5	1	2	1	0	0	2	0	1	1	1	1	0	1	2	2	7	2	1	1	1	4	2	2	1	4
Wee2_chr6_40439088_40466813_(+)	Wee2	chr6	40439088	40466813	+	1	0	3	0	1	0	0	0	1	0	0	1	0	0	0	0	0	0	1	0	0	0	0	0	0	0	0	0	0	0
Ssbp1_chr6_40471352_40484700_(+)	Ssbp1	chr6	40471352	40484700	+	603	66	740	83	599	67	556	47	198	22	211	33	214	19	234	34	158	26	594	70	497	39	486	37	470	41	535	41	554	53
Tas2r137_chr6_40491233_40492305_(+)	Tas2r137	chr6	40491233	40492305	+	4	0	3	3	5	0	1	0	2	0	4	0	0	0	0	0	1	0	3	0	1	0	0	0	2	0	3	4	2	0
Tas2r108_chr6_40493529_40494541_(+)	Tas2r108	chr6	40493529	40494541	+	2	0	0	0	1	0	1	0	0	0	0	0	0	0	0	0	0	0	1	0	1	0	1	0	1	0	0	0	1	0
Prss37_chr6_40514824_40519508_(-)	Prss37	chr6	40514824	40519508	-	0	0	0	0	0	0	0	0	0	0	0	0	0	0	0	0	0	0	0	0	0	0	0	0	0	0	0	0	0	0
Gm43295_chr6_40522804_40523215_(-)	Gm43295	chr6	40522804	40523215	-	0	0	0	0	0	0	0	0	0	0	0	0	0	0	0	0	0	0	0	0	0	0	0	0	0	0	0	0	0	0
Olfr461_chr6_40542171_40555050_(-)	Olfr461	chr6	40542171	40555050	-	0	0	0	0	0	0	0	0	0	0	0	0	0	0	0	0	0	0	0	0	0	0	0	0	0	0	0	0	0	0
Olfr460_chr6_40569487_40574343_(+)	Olfr460	chr6	40569487	40574343	+	1	2	0	0	0	0	0	0	0	0	1	0	2	0	1	0	0	0	1	0	0	0	2	0	0	0	0	0	0	0
Clec5a_chr6_40574894_40585821_(-)	Clec5a	chr6	40574894	40585821	-	0	0	0	0	0	0	0	0	0	0	0	0	0	0	0	0	0	0	0	0	0	0	0	0	0	0	0	0	0	0
Tas2r138_chr6_40612315_40613310_(-)	Tas2r138	chr6	40612315	40613310	-	0	0	0	0	0	0	0	0	0	0	0	0	0	0	0	0	0	0	0	0	0	0	0	0	0	0	0	0	0	0
Mgam_chr6_40628831_40769123_(+)	Mgam	chr6	40628831	40769123	+	0	0	0	0	0	0	0	0	0	0	0	0	0	0	0	0	0	0	0	0	0	0	0	0	0	0	0	0	0	0
Mgam2-ps_chr6_40778711_40868164_(+)	Mgam2-ps	chr6	40778711	40868164	+	0	0	0	0	0	0	0	0	0	0	0	0	0	0	0	0	0	0	0	0	0	0	0	0	0	0	0	0	0	0
Moxd2_chr6_40878794_40887494_(-)	Moxd2	chr6	40878794	40887494	-	0	0	0	0	0	0	0	0	0	0	0	0	0	0	0	0	0	0	0	0	0	0	0	0	0	0	0	0	0	0
Gm38276_chr6_40889528_40890870_(-)	Gm38276	chr6	40889528	40890870	-	0	0	0	0	0	0	0	0	0	0	0	0	0	0	0	0	0	0	0	0	0	0	0	0	0	0	0	0	0	0
Trbv1_chr6_40891229_40891885_(+)	Trbv1	chr6	40891229	40891885	+	0	0	0	0	0	0	0	0	0	0	0	0	0	0	0	0	0	0	0	0	0	0	0	0	0	0	0	0	0	0
Prss58_chr6_40895270_40900387_(-)	Prss58	chr6	40895270	40900387	-	0	0	0	0	0	0	0	0	0	0	0	0	0	0	0	0	0	0	0	0	0	0	0	0	0	0	0	0	0	0
1700074P13Rik_chr6_40920437_40940557_(-)	1700074P13Rik	chr6	40920437	40940557	-	0	0	0	0	0	0	0	0	0	0	0	0	0	0	0	0	0	0	0	0	0	0	0	0	0	0	0	0	0	0
Gm4744_chr6_40948463_40954353_(-)	Gm4744	chr6	40948463	40954353	-	0	0	0	0	0	0	0	0	0	0	0	0	0	0	0	0	0	0	0	0	0	0	0	0	0	0	0	0	0	0
Gm29588_chr6_40950224_40950521_(+)	Gm29588	chr6	40950224	40950521	+	0	0	0	0	0	0	0	0	0	0	0	0	0	0	0	0	0	0	0	0	0	0	0	0	0	0	0	0	0	0
1810009J06Rik_chr6_40964754_40968435_(+)	1810009J06Rik	chr6	40964754	40968435	+	0	0	0	0	0	0	0	0	0	0	0	0	0	0	0	0	0	0	0	0	0	0	0	0	0	0	0	0	0	0
Gm2663_chr6_40995830_40999479_(-)	Gm2663	chr6	40995830	40999479	-	0	0	0	0	0	0	0	0	0	0	0	0	0	0	0	0	0	0	0	0	0	0	0	0	0	0	0	0	0	0
Gm38015_chr6_41011181_41011368_(-)	Gm38015	chr6	41011181	41011368	-	0	0	0	0	0	0	0	0	0	0	0	0	0	0	0	0	0	0	0	0	0	0	0	0	0	0	0	0	0	0
Gm37878_chr6_41021243_41021884_(-)	Gm37878	chr6	41021243	41021884	-	0	0	0	0	0	0	0	0	0	0	0	0	0	0	0	0	0	0	0	0	0	0	0	0	0	0	0	0	0	0
Gm38294_chr6_41026265_41026645_(+)	Gm38294	chr6	41026265	41026645	+	0	0	0	0	0	0	0	0	0	0	0	0	0	0	0	0	0	0	0	0	0	0	0	0	0	0	0	0	0	0
2210010C04Rik_chr6_41030268_41035509_(-)	2210010C04Rik	chr6	41030268	41035509	-	0	0	0	0	0	0	0	0	0	0	0	0	0	0	0	0	0	0	0	0	0	0	0	0	0	0	0	0	0	0
Trbv2_chr6_41047340_41047995_(+)	Trbv2	chr6	41047340	41047995	+	0	0	0	0	0	0	0	0	0	0	0	0	0	0	0	0	0	0	0	0	0	0	0	0	0	0	0	0	0	0
Trbv3_chr6_41048290_41048828_(+)	Trbv3	chr6	41048290	41048828	+	0	0	0	0	0	0	0	0	0	0	0	0	0	0	0	0	0	0	0	0	0	0	0	0	0	0	0	0	0	0
5830405F06Rik_chr6_41055883_41063102_(+)	5830405F06Rik	chr6	41055883	41063102	+	0	0	0	0	0	0	0	0	0	0	0	0	0	0	0	0	0	0	0	0	0	0	0	0	0	0	0	0	0	0
Trbv4_chr6_41059394_41059886_(+)	Trbv4	chr6	41059394	41059886	+	0	0	0	0	0	0	0	0	0	0	0	0	0	0	0	0	0	0	0	0	0	0	0	0	0	0	0	0	0	0
Trbv5_chr6_41062332_41062803_(+)	Trbv5	chr6	41062332	41062803	+	0	0	0	0	0	0	0	0	0	0	0	0	0	0	0	0	0	0	0	0	0	0	0	0	0	0	0	0	0	0
Trbv6_chr6_41066879_41067154_(+)	Trbv6	chr6	41066879	41067154	+	0	0	0	0	0	0	0	0	0	0	0	0	0	0	0	0	0	0	0	0	0	0	0	0	0	0	0	0	0	0
Trbv7_chr6_41080253_41080654_(+)	Trbv7	chr6	41080253	41080654	+	0	0	0	0	0	0	0	0	0	0	0	0	0	0	0	0	0	0	0	0	0	0	0	0	0	0	0	0	0	0
Gm49885_chr6_41081587_41091983_(+)	Gm49885	chr6	41081587	41091983	+	0	0	0	0	0	0	0	0	0	0	0	0	0	0	0	0	0	0	0	0	0	0	0	1	0	0	0	0	0	0
Trbv8_chr6_41084821_41085105_(+)	Trbv8	chr6	41084821	41085105	+	0	0	0	0	0	0	0	0	0	0	0	0	0	0	0	0	0	0	0	0	0	0	0	0	0	0	0	0	0	0
Trbv9_chr6_41087999_41088288_(+)	Trbv9	chr6	41087999	41088288	+	0	0	0	0	0	0	0	0	0	0	0	0	0	0	0	0	0	0	0	0	0	0	0	0	0	0	0	0	0	0
Trbv10_chr6_41091940_41092228_(+)	Trbv10	chr6	41091940	41092228	+	0	0	0	0	0	0	0	0	0	0	0	0	0	0	0	0	0	0	0	0	0	0	0	0	0	0	0	0	0	0
Trbv11_chr6_41107044_41107303_(+)	Trbv11	chr6	41107044	41107303	+	0	0	0	0	0	0	0	0	0	0	0	0	0	0	0	0	0	0	0	0	0	0	0	0	0	0	0	0	0	0
Trbv12-1_chr6_41113550_41114067_(+)	Trbv12-1	chr6	41113550	41114067	+	0	0	0	0	0	0	0	0	0	0	0	0	0	0	0	0	0	0	0	0	0	0	0	0	0	0	0	0	0	0
Trbv13-1_chr6_41116007_41116468_(+)	Trbv13-1	chr6	41116007	41116468	+	0	0	0	0	0	0	0	0	0	0	0	0	0	0	0	0	0	0	0	0	0	0	0	0	0	0	0	0	0	0
Trbv12-2_chr6_41118851_41119364_(+)	Trbv12-2	chr6	41118851	41119364	+	0	0	0	0	0	0	1	0	0	0	0	0	0	0	0	0	0	0	0	0	0	0	0	0	0	0	0	0	0	0
Trbv13-2_chr6_41121396_41121832_(+)	Trbv13-2	chr6	41121396	41121832	+	0	0	0	0	0	0	0	0	0	0	0	0	0	0	0	0	0	0	0	0	0	0	0	0	0	0	0	0	0	0
Trbv12-3_chr6_41127592_41128076_(+)	Trbv12-3	chr6	41127592	41128076	+	0	0	0	0	0	0	0	0	0	0	0	0	0	0	0	0	0	0	0	0	0	0	0	0	0	0	0	0	0	0
Trbv13-3_chr6_41130147_41130585_(+)	Trbv13-3	chr6	41130147	41130585	+	0	0	0	0	0	0	0	0	0	0	0	0	0	0	0	0	0	0	0	0	0	0	0	0	0	0	0	0	0	0
Trbv14_chr6_41135145_41135616_(+)	Trbv14	chr6	41135145	41135616	+	0	0	0	0	0	0	0	0	0	0	0	0	0	0	0	0	0	0	0	0	0	0	0	0	0	0	0	0	0	0
Trbv15_chr6_41141188_41141658_(+)	Trbv15	chr6	41141188	41141658	+	0	0	0	0	0	0	0	0	0	0	0	0	0	0	0	0	0	0	0	0	0	0	0	0	0	0	0	0	0	0
Trbv16_chr6_41151740_41152230_(+)	Trbv16	chr6	41151740	41152230	+	0	0	0	0	0	0	0	0	0	0	0	0	0	0	0	0	0	0	0	0	0	0	0	0	0	0	0	0	0	0
Trbv17_chr6_41163062_41163556_(+)	Trbv17	chr6	41163062	41163556	+	0	0	0	0	0	0	0	0	0	0	0	0	0	0	0	0	0	0	0	0	0	0	0	0	0	0	0	0	0	0
Trbv18_chr6_41175315_41175608_(+)	Trbv18	chr6	41175315	41175608	+	0	0	0	0	0	0	0	0	0	0	0	0	0	0	0	0	0	0	0	0	0	0	0	0	0	0	0	0	0	0
Trbv19_chr6_41178375_41179048_(+)	Trbv19	chr6	41178375	41179048	+	0	0	0	0	0	0	0	0	0	0	0	0	0	0	0	0	0	0	0	0	0	0	0	0	0	0	0	0	0	0
Trbv20_chr6_41188273_41188977_(+)	Trbv20	chr6	41188273	41188977	+	0	0	0	0	0	0	0	0	0	0	0	0	0	0	0	0	0	0	0	0	0	0	0	0	0	0	0	0	0	0
Trbv21_chr6_41202550_41203044_(+)	Trbv21	chr6	41202550	41203044	+	0	0	0	0	0	0	0	0	0	0	0	0	0	0	0	0	0	0	0	0	0	0	0	0	0	0	0	0	0	0
Trbv22_chr6_41212244_41212534_(+)	Trbv22	chr6	41212244	41212534	+	0	0	0	0	0	0	0	0	0	0	0	0	0	0	0	0	0	0	0	0	0	0	0	0	0	0	0	0	0	0
Trbv23_chr6_41216073_41216526_(+)	Trbv23	chr6	41216073	41216526	+	0	0	0	0	0	0	0	0	0	0	0	0	0	0	0	0	0	0	0	0	0	0	0	0	0	0	0	0	0	0
Trbv24_chr6_41218091_41218557_(+)	Trbv24	chr6	41218091	41218557	+	0	0	0	0	0	0	0	0	0	0	0	0	0	0	0	0	0	0	0	0	0	0	0	0	0	0	0	0	0	0
Trbv25_chr6_41221931_41222203_(+)	Trbv25	chr6	41221931	41222203	+	0	0	0	0	0	0	0	0	0	0	0	0	0	0	0	0	0	0	0	0	0	0	0	0	0	0	0	0	0	0
Trbv26_chr6_41227505_41227993_(+)	Trbv26	chr6	41227505	41227993	+	0	0	0	0	0	0	0	0	0	0	0	0	0	0	0	0	0	0	0	0	0	0	0	0	0	0	0	0	0	0
Gm2719_chr6_41253328_41253771_(+)	Gm2719	chr6	41253328	41253771	+	0	0	0	0	0	0	0	0	0	0	0	0	0	1	0	0	0	1	0	0	0	0	0	0	0	0	0	0	0	0
Trbv27_chr6_41258303_41258579_(+)	Trbv27	chr6	41258303	41258579	+	0	0	0	0	0	0	0	0	0	0	0	0	0	0	0	0	0	0	0	0	0	0	0	0	0	0	0	0	0	0
Trbv28_chr6_41266887_41267150_(+)	Trbv28	chr6	41266887	41267150	+	0	0	0	0	0	0	0	0	0	0	0	0	0	0	0	0	0	0	0	0	0	0	0	0	0	0	0	0	0	0
Trbv29_chr6_41271394_41271881_(+)	Trbv29	chr6	41271394	41271881	+	0	0	0	0	0	0	0	0	0	0	0	0	0	0	0	0	0	0	0	0	0	0	0	0	0	0	0	0	0	0
Trbv30_chr6_41281376_41281990_(+)	Trbv30	chr6	41281376	41281990	+	0	0	0	0	0	0	0	0	0	0	0	0	0	0	0	0	0	0	0	0	0	0	0	0	0	0	0	0	0	0
Try4_chr6_41302269_41305532_(+)	Try4	chr6	41302269	41305532	+	0	0	0	0	0	0	0	0	0	0	0	0	0	0	0	0	0	0	0	0	0	0	0	0	0	0	0	0	0	0
Gm18964_chr6_41306203_41306765_(-)	Gm18964	chr6	41306203	41306765	-	0	0	0	0	0	0	0	0	0	0	0	0	0	0	0	0	0	0	0	0	0	0	0	0	0	0	0	0	0	0
Try5_chr6_41311233_41316841_(-)	Try5	chr6	41311233	41316841	-	0	0	0	0	0	0	0	0	0	0	0	0	0	0	0	1	0	0	0	0	0	0	0	0	0	0	0	0	0	0
Try10_chr6_41354105_41357914_(+)	Try10	chr6	41354105	41357914	+	0	0	0	0	0	0	0	0	0	0	0	0	0	0	0	0	0	0	0	0	0	0	0	0	0	0	0	0	0	0
Prss3_chr6_41373814_41377678_(-)	Prss3	chr6	41373814	41377678	-	0	0	0	0	0	0	0	0	0	0	0	0	0	0	0	0	0	0	0	0	0	0	0	0	0	0	0	0	0	0
Gm5771_chr6_41392356_41397230_(+)	Gm5771	chr6	41392356	41397230	+	0	0	0	0	0	0	0	0	0	0	0	0	0	0	0	0	0	0	0	0	0	0	0	0	0	0	0	0	0	0
Gm38306_chr6_41406915_41407267_(+)	Gm38306	chr6	41406915	41407267	+	0	0	0	0	0	0	0	0	0	0	0	0	0	0	0	0	0	0	0	0	0	0	0	0	0	0	0	0	0	0
Gm5409_chr6_41416912_41419589_(+)	Gm5409	chr6	41416912	41419589	+	0	0	0	0	0	0	0	0	0	0	0	0	0	0	0	0	0	0	1	0	0	0	0	0	0	0	0	0	0	0
Gm10334_chr6_41442216_41446145_(-)	Gm10334	chr6	41442216	41446145	-	0	0	0	0	0	0	0	0	0	0	0	0	0	0	0	0	0	0	0	0	0	0	0	0	0	0	0	0	0	0
Prss1_chr6_41458932_41463786_(+)	Prss1	chr6	41458932	41463786	+	0	0	0	0	0	0	0	0	0	0	0	0	0	0	0	0	0	0	0	0	0	0	0	0	0	0	0	0	0	0
Gm37301_chr6_41480508_41481719_(+)	Gm37301	chr6	41480508	41481719	+	0	0	0	0	0	0	0	0	0	0	0	0	0	0	0	0	0	0	0	0	0	0	0	0	0	0	0	0	0	0
Gm29813_chr6_41494521_41494967_(-)	Gm29813	chr6	41494521	41494967	-	0	0	0	0	0	0	0	0	0	0	0	0	0	0	0	0	0	0	0	0	0	0	0	0	0	0	0	0	0	0
Gm37841_chr6_41496929_41497304_(+)	Gm37841	chr6	41496929	41497304	+	0	0	0	0	0	0	0	0	0	0	0	0	0	0	0	0	0	0	0	0	0	0	0	0	0	0	0	0	0	0
Gm38018_chr6_41504124_41505654_(+)	Gm38018	chr6	41504124	41505654	+	0	0	0	0	0	0	0	0	0	0	0	0	0	0	0	0	0	0	0	0	0	0	0	0	0	0	0	0	0	0
Prss2_chr6_41521787_41525079_(+)	Prss2	chr6	41521787	41525079	+	0	0	0	0	0	0	0	0	0	0	0	0	0	0	0	0	0	0	0	0	0	0	0	0	0	0	0	0	0	0
Trbd1_chr6_41533201_41533212_(+)	Trbd1	chr6	41533201	41533212	+	0	0	0	0	0	0	0	0	0	0	0	0	0	0	0	0	0	0	0	0	0	0	0	0	0	0	0	0	0	0
Trbj1-1_chr6_41533864_41533911_(+)	Trbj1-1	chr6	41533864	41533911	+	0	0	0	0	0	0	0	0	0	0	0	0	0	0	0	0	0	0	0	0	0	0	0	0	0	0	0	0	0	0
Trbj1-2_chr6_41534001_41534048_(+)	Trbj1-2	chr6	41534001	41534048	+	0	0	0	0	0	0	0	0	0	0	0	0	0	0	0	0	0	0	0	0	0	0	0	0	0	0	0	0	0	0
Trbj1-3_chr6_41534323_41534376_(+)	Trbj1-3	chr6	41534323	41534376	+	0	0	0	0	0	0	0	0	0	0	0	0	0	0	0	0	0	0	0	0	0	0	0	0	0	0	0	0	0	0
Trbj1-4_chr6_41534811_41534861_(+)	Trbj1-4	chr6	41534811	41534861	+	0	0	0	0	0	0	0	0	0	0	0	0	0	0	0	0	0	0	0	0	0	0	0	0	0	0	0	0	0	0
Trbj1-5_chr6_41535084_41535133_(+)	Trbj1-5	chr6	41535084	41535133	+	0	0	0	0	0	0	0	0	0	0	0	0	0	0	0	0	0	0	0	0	0	0	0	0	0	0	0	0	0	0
Trbj1-6_chr6_41535554_41535606_(+)	Trbj1-6	chr6	41535554	41535606	+	0	0	0	0	0	0	0	0	0	0	0	0	0	0	0	0	0	0	0	0	0	0	0	0	0	0	0	0	0	0
Trbj1-7_chr6_41535642_41535687_(+)	Trbj1-7	chr6	41535642	41535687	+	0	0	0	0	0	0	0	0	0	0	0	0	0	0	0	0	0	0	0	0	0	0	0	0	0	0	0	0	0	0
Trbc1_chr6_41538218_41539881_(+)	Trbc1	chr6	41538218	41539881	+	0	0	0	0	0	0	0	0	0	0	0	0	0	0	0	0	0	0	0	0	0	0	0	0	0	0	0	0	0	0
Trbd2_chr6_41542163_41542176_(+)	Trbd2	chr6	41542163	41542176	+	0	0	0	0	0	0	0	0	0	0	0	0	0	0	0	0	0	0	0	0	0	0	0	0	0	0	0	0	0	0
Trbj2-1_chr6_41542754_41542803_(+)	Trbj2-1	chr6	41542754	41542803	+	0	0	0	0	0	0	0	0	0	0	0	0	0	0	0	0	0	0	0	0	0	0	0	0	0	0	0	0	0	0
Trbj2-2_chr6_41542957_41543007_(+)	Trbj2-2	chr6	41542957	41543007	+	0	0	0	0	0	0	0	0	0	0	0	0	0	0	0	0	0	0	0	0	0	0	0	0	0	0	0	0	0	0
Trbj2-3_chr6_41543223_41543271_(+)	Trbj2-3	chr6	41543223	41543271	+	0	0	0	0	0	0	0	0	0	0	0	0	0	0	0	0	0	0	0	0	0	0	0	0	0	0	0	0	0	0
Trbj2-4_chr6_41543362_41543410_(+)	Trbj2-4	chr6	41543362	41543410	+	0	0	0	0	0	0	0	0	0	0	0	0	0	0	0	0	0	0	0	0	0	0	0	0	0	0	0	0	0	0
Trbj2-5_chr6_41543453_41543501_(+)	Trbj2-5	chr6	41543453	41543501	+	0	0	0	0	0	0	0	0	0	0	0	0	0	0	0	0	0	0	0	0	0	0	0	0	0	0	0	0	0	0
Trbj2-6_chr6_41543598_41543645_(+)	Trbj2-6	chr6	41543598	41543645	+	0	0	0	0	0	0	0	0	0	0	0	0	0	0	0	0	0	0	0	0	0	0	0	0	0	0	0	0	0	0
Trbj2-7_chr6_41543810_41543856_(+)	Trbj2-7	chr6	41543810	41543856	+	0	0	0	0	0	0	0	0	0	0	0	0	0	0	0	0	0	0	0	0	0	0	0	0	0	0	0	0	0	0
Trbc2_chr6_41546730_41548352_(+)	Trbc2	chr6	41546730	41548352	+	0	0	0	0	0	0	0	0	0	0	0	0	0	0	0	0	0	0	1	0	0	0	0	0	0	0	0	0	0	0
Trbv31_chr6_41557691_41558452_(-)	Trbv31	chr6	41557691	41558452	-	0	0	0	0	1	0	0	0	0	0	0	0	0	0	0	0	0	0	1	1	0	0	0	0	0	0	0	0	0	1
Gm27549_chr6_41602244_41602305_(-)	Gm27549	chr6	41602244	41602305	-	0	0	0	0	0	0	0	0	0	0	0	0	0	0	0	0	0	0	0	0	0	0	0	0	0	0	0	0	0	0
Ephb6_chr6_41605482_41620509_(+)	Ephb6	chr6	41605482	41620509	+	9	4	10	5	3	6	9	4	5	3	6	1	4	0	5	5	1	4	6	7	10	6	3	5	6	5	5	6	8	6
Trpv6_chr6_41620624_41636405_(-)	Trpv6	chr6	41620624	41636405	-	0	0	0	0	0	0	0	0	0	0	0	0	0	0	0	0	0	0	0	0	0	0	0	0	0	0	0	0	0	0
Trpv5_chr6_41652173_41680769_(-)	Trpv5	chr6	41652173	41680769	-	0	0	5	2	1	0	0	0	0	0	0	1	1	0	0	0	0	0	2	0	0	0	0	0	0	0	1	1	1	0
Llcfc1_chr6_41684431_41685717_(+)	Llcfc1	chr6	41684431	41685717	+	0	0	0	0	0	0	0	0	0	0	0	0	0	0	0	0	0	0	0	0	0	0	0	0	0	0	0	0	0	0
Kel_chr6_41686330_41704339_(-)	Kel	chr6	41686330	41704339	-	0	0	0	0	0	0	0	0	0	0	0	0	0	0	0	0	0	0	0	0	0	1	0	0	0	0	0	1	1	0
Gm37527_chr6_41692640_41696186_(-)	Gm37527	chr6	41692640	41696186	-	0	0	0	0	0	0	0	0	0	0	0	0	0	0	0	0	0	0	0	0	0	0	0	0	0	0	0	0	0	0
Olfr459_chr6_41768770_41775177_(-)	Olfr459	chr6	41768770	41775177	-	0	0	0	0	0	0	0	0	0	0	0	0	0	0	0	0	0	0	0	0	0	0	0	0	0	0	0	0	0	0
Pip_chr6_41847535_41852065_(+)	Pip	chr6	41847535	41852065	+	0	0	0	0	0	0	0	0	0	0	0	0	0	0	0	0	0	0	0	0	0	0	0	0	0	0	0	0	0	0
Sval2_chr6_41852989_41864413_(+)	Sval2	chr6	41852989	41864413	+	0	0	0	0	0	0	0	0	0	0	0	0	0	0	0	0	0	0	0	0	0	0	0	0	0	0	0	0	0	0
Sval1_chr6_41951630_41956098_(+)	Sval1	chr6	41951630	41956098	+	0	0	0	0	0	0	0	0	0	0	0	0	0	0	0	0	0	0	0	0	0	0	0	0	0	0	0	0	0	0
Sval3_chr6_41968140_41973090_(+)	Sval3	chr6	41968140	41973090	+	0	0	0	0	0	0	0	0	0	0	0	0	0	0	0	0	0	0	0	0	0	0	0	0	0	0	0	0	0	0
Sva_chr6_42038394_42042851_(+)	Sva	chr6	42038394	42042851	+	0	0	0	0	0	0	2	0	0	0	0	0	0	0	0	0	0	0	3	0	1	0	0	0	0	0	0	0	0	0
Gm34701_chr6_42105700_42106548_(-)	Gm34701	chr6	42105700	42106548	-	0	0	0	0	0	0	0	0	0	0	0	0	0	0	0	0	0	0	0	0	0	0	0	0	0	0	0	0	0	0
Tas2r139_chr6_42140936_42141895_(+)	Tas2r139	chr6	42140936	42141895	+	0	0	0	0	0	0	0	0	0	0	0	0	0	0	0	0	0	0	0	0	0	0	0	0	0	0	0	0	0	0
Tas2r144_chr6_42215328_42216287_(+)	Tas2r144	chr6	42215328	42216287	+	0	0	0	0	0	0	0	0	0	0	0	0	0	0	0	0	0	0	0	0	0	0	0	0	0	0	0	0	0	0
Gstk1_chr6_42245935_42250447_(+)	Gstk1	chr6	42245935	42250447	+	8	2	2	2	5	0	7	0	0	0	2	2	0	0	2	1	0	0	2	0	3	0	5	2	3	2	0	1	2	1
Tmem139_chr6_42261959_42264555_(+)	Tmem139	chr6	42261959	42264555	+	1	0	1	0	1	0	1	0	0	0	0	1	0	0	0	0	0	0	1	0	0	1	0	0	1	2	2	1	2	1
Casp2_chr6_42264985_42282508_(+)	Casp2	chr6	42264985	42282508	+	303	79	301	88	242	73	273	64	48	24	76	53	72	36	95	34	82	25	143	65	139	69	89	63	137	65	117	45	131	72
Gm25108_chr6_42275650_42275727_(+)	Gm25108	chr6	42275650	42275727	+	0	0	0	0	0	0	1	0	0	0	0	0	0	0	0	0	0	0	0	0	0	0	0	0	0	0	0	0	0	0
Clcn1_chr6_42286685_42315756_(+)	Clcn1	chr6	42286685	42315756	+	122	38	72	29	62	20	137	53	25	27	39	30	41	19	84	52	36	23	42	15	67	34	43	22	61	28	36	11	55	31
Fam131b_chr6_42315312_42324643_(-)	Fam131b	chr6	42315312	42324643	-	12	4	2	1	12	2	6	0	1	0	3	1	7	1	2	0	4	0	3	1	4	1	2	1	1	0	0	1	2	2
Gm44284_chr6_42328713_42350862_(-)	Gm44284	chr6	42328713	42350862	-	1	0	0	1	2	0	3	1	0	0	0	0	0	0	0	0	0	0	3	0	1	2	1	0	1	0	1	1	2	0
Gm24611_chr6_42337677_42337783_(-)	Gm24611	chr6	42337677	42337783	-	0	0	0	0	0	0	0	0	0	0	0	0	0	0	0	0	0	0	0	0	0	0	0	0	0	0	0	0	0	0
Zyx_chr6_42349630_42360213_(+)	Zyx	chr6	42349630	42360213	+	53	4	30	2	43	7	10	1	9	5	8	2	13	2	8	4	9	4	6	1	4	2	10	5	13	10	3	1	5	0
Epha1_chr6_42358487_42373268_(-)	Epha1	chr6	42358487	42373268	-	30	9	23	1	23	6	6	5	6	2	6	6	4	2	9	6	0	3	5	2	5	2	6	4	7	4	2	0	0	4
2010310C07Rik_chr6_42370671_42381215_(+)	2010310C07Rik	chr6	42370671	42381215	+	9	1	1	0	1	0	2	0	0	0	1	0	0	2	2	0	1	1	0	0	0	0	0	0	0	0	0	0	0	0
Tas2r143_chr6_42400238_42401119_(+)	Tas2r143	chr6	42400238	42401119	+	0	0	0	0	0	0	0	0	0	0	0	0	0	0	1	0	0	0	0	0	0	0	0	0	0	0	0	0	0	0
Tas2r135_chr6_42405434_42406526_(+)	Tas2r135	chr6	42405434	42406526	+	0	0	0	0	0	0	0	0	0	0	0	0	0	0	0	0	0	0	0	0	0	0	0	0	0	0	0	0	0	0
Tas2r126_chr6_42434535_42435464_(+)	Tas2r126	chr6	42434535	42435464	+	0	0	0	0	0	0	0	0	0	0	0	0	0	0	0	0	0	0	0	0	0	0	0	0	0	0	0	0	0	0
Gm44470_chr6_42443790_42443931_(-)	Gm44470	chr6	42443790	42443931	-	0	0	0	0	0	0	0	0	0	0	0	0	0	0	0	0	0	0	0	0	0	0	0	0	0	0	0	0	0	0
Olfr458_chr6_42459979_42465196_(-)	Olfr458	chr6	42459979	42465196	-	0	0	0	0	0	0	0	0	0	0	0	0	0	0	0	0	0	0	0	0	0	0	0	0	0	0	0	0	0	0
Olfr457_chr6_42468015_42476335_(-)	Olfr457	chr6	42468015	42476335	-	0	0	0	0	0	0	0	0	0	0	0	0	0	0	0	0	0	0	0	0	0	0	0	0	0	0	0	0	0	0
Olfr456_chr6_42486163_42487214_(-)	Olfr456	chr6	42486163	42487214	-	0	0	0	0	0	0	0	0	0	0	0	0	0	0	0	0	0	0	0	0	0	0	0	0	0	0	0	0	0	0
Gm4877_chr6_42519516_42520313_(-)	Gm4877	chr6	42519516	42520313	-	1	1	0	0	0	0	1	0	0	0	0	0	0	0	0	0	0	0	1	0	0	1	0	0	0	0	0	0	0	0
Olfr455_chr6_42535664_42547587_(-)	Olfr455	chr6	42535664	42547587	-	0	0	0	0	0	0	0	0	0	0	0	0	0	0	0	0	0	0	0	0	0	0	0	0	0	0	0	0	0	0
Tcaf3_chr6_42584866_42597692_(-)	Tcaf3	chr6	42584866	42597692	-	0	0	0	0	0	0	0	0	0	0	0	0	0	0	0	0	0	0	0	0	0	0	0	0	0	0	0	0	0	0
Tcaf2_chr6_42623016_42645254_(-)	Tcaf2	chr6	42623016	42645254	-	13	2	17	3	12	2	17	1	6	0	5	1	3	0	2	0	3	0	4	1	2	2	4	2	6	3	6	2	7	1
Tcaf1_chr6_42668002_42710088_(-)	Tcaf1	chr6	42668002	42710088	-	79	27	58	21	54	18	38	12	13	12	31	7	16	3	9	5	8	4	15	8	24	8	12	19	23	22	17	8	27	19
Olfr454-ps1_chr6_42721916_42722263_(+)	Olfr454-ps1	chr6	42721916	42722263	+	0	0	0	0	0	0	0	0	0	0	0	0	0	0	0	0	0	0	0	0	0	0	0	0	0	0	0	0	0	0
Gm44030_chr6_42725591_42726022_(+)	Gm44030	chr6	42725591	42726022	+	0	0	0	0	0	0	0	0	0	0	0	0	0	0	0	0	0	0	0	0	0	0	0	0	0	0	0	0	0	0
Gm44032_chr6_42733934_42734099_(-)	Gm44032	chr6	42733934	42734099	-	0	0	0	0	0	0	0	0	0	0	0	0	0	0	0	0	0	0	0	0	0	0	0	0	0	0	0	0	0	0
Olfr453_chr6_42739371_42746963_(+)	Olfr453	chr6	42739371	42746963	+	0	0	0	0	0	0	0	0	0	0	0	0	0	0	0	0	0	0	0	0	0	0	0	0	0	0	0	0	0	0
Gm44034_chr6_42745187_42745250_(+)	Gm44034	chr6	42745187	42745250	+	0	0	0	0	0	0	0	0	0	0	0	0	0	0	0	0	0	0	0	0	0	0	0	0	0	0	0	0	0	0
Olfr38_chr6_42756404_42763231_(+)	Olfr38	chr6	42756404	42763231	+	0	0	0	0	0	0	0	0	0	0	0	0	0	0	0	0	0	0	0	0	0	0	0	0	0	0	0	0	0	0
Gm22363_chr6_42775573_42775680_(-)	Gm22363	chr6	42775573	42775680	-	0	0	0	0	0	0	0	1	0	0	0	0	0	0	0	0	0	0	0	0	0	0	0	0	0	0	0	0	0	0
Olfr452_chr6_42785093_42791619_(+)	Olfr452	chr6	42785093	42791619	+	0	0	0	0	0	0	0	0	0	0	0	0	0	0	0	0	0	0	0	0	0	0	0	0	0	0	0	0	0	0
Olfr451-ps1_chr6_42800743_42801678_(+)	Olfr451-ps1	chr6	42800743	42801678	+	0	0	0	0	0	0	0	0	0	0	0	0	0	0	0	0	0	0	0	0	0	0	0	0	0	0	0	0	0	0
Olfr450_chr6_42811939_42819081_(+)	Olfr450	chr6	42811939	42819081	+	0	0	0	0	0	0	0	0	0	0	0	0	0	0	0	0	0	0	0	0	0	0	0	0	0	0	0	0	0	0
Gm23982_chr6_42832779_42832884_(+)	Gm23982	chr6	42832779	42832884	+	0	0	0	0	0	0	0	0	0	0	0	0	0	0	0	0	0	0	0	0	0	0	0	0	0	0	0	0	0	0
Olfr449_chr6_42834384_42839516_(+)	Olfr449	chr6	42834384	42839516	+	0	0	0	0	1	0	0	0	0	0	0	0	0	0	0	0	0	0	0	0	0	0	0	0	0	0	0	0	0	0
Olfr448_chr6_42890441_42899085_(+)	Olfr448	chr6	42890441	42899085	+	0	0	0	0	0	0	0	0	0	0	0	0	0	0	0	0	0	0	0	0	0	0	0	0	0	1	0	0	0	0
Olfr447_chr6_42908878_42914273_(+)	Olfr447	chr6	42908878	42914273	+	0	0	0	0	0	0	0	0	0	0	0	0	0	0	0	0	0	0	0	0	0	0	0	0	0	0	0	0	0	0
Olfr446_chr6_42921377_42931141_(+)	Olfr446	chr6	42921377	42931141	+	0	0	0	0	0	0	0	0	0	0	0	0	0	0	0	0	0	0	0	0	0	0	0	0	0	0	0	0	0	0
Olrf445-ps1_chr6_42934594_42934907_(+)	Olrf445-ps1	chr6	42934594	42934907	+	0	0	0	0	0	0	0	0	0	0	0	0	0	0	0	0	0	0	0	0	0	0	0	0	0	0	0	0	0	0
Olfr444_chr6_42949067_42956764_(+)	Olfr444	chr6	42949067	42956764	+	0	0	0	0	0	0	0	0	0	0	0	0	0	0	0	0	0	0	0	0	0	0	0	0	0	0	0	0	0	0
Gm17472_chr6_42980690_42981150_(+)	Gm17472	chr6	42980690	42981150	+	0	0	0	0	0	0	0	0	0	0	0	0	0	0	0	0	0	0	0	0	0	0	0	0	0	0	0	0	0	0
Olfr443-ps1_chr6_43067308_43095584_(+)	Olfr443-ps1	chr6	43067308	43095584	+	0	0	0	0	0	0	0	0	0	0	0	0	0	0	0	0	0	0	1	0	0	0	0	0	0	0	0	0	1	0
Gm20730_chr6_43081518_43082097_(-)	Gm20730	chr6	43081518	43082097	-	0	0	0	0	0	0	0	0	0	0	0	0	0	0	0	0	0	0	0	0	0	0	0	0	0	0	0	0	0	0
Olfr442-ps1_chr6_43099400_43099715_(+)	Olfr442-ps1	chr6	43099400	43099715	+	0	0	0	0	0	0	0	0	0	0	0	0	0	0	0	0	0	0	0	0	0	0	0	0	0	0	0	0	0	0
Olfr441_chr6_43106369_43117803_(+)	Olfr441	chr6	43106369	43117803	+	0	0	0	0	0	1	0	0	0	0	0	0	0	0	0	0	0	0	0	0	0	0	0	0	0	0	0	0	0	0
Olfr440-ps1_chr6_43122350_43123266_(+)	Olfr440-ps1	chr6	43122350	43123266	+	0	0	0	0	0	0	0	0	0	0	0	0	0	0	0	0	0	0	0	0	0	0	0	0	0	0	0	0	0	0
Olfr439-ps1_chr6_43138133_43138439_(+)	Olfr439-ps1	chr6	43138133	43138439	+	0	0	0	0	0	0	0	0	0	0	0	0	0	0	0	0	0	0	0	0	0	0	0	0	0	0	0	0	0	0
Olfr237_chr6_43146567_43157169_(+)	Olfr237	chr6	43146567	43157169	+	0	0	0	0	0	0	0	0	0	0	0	0	0	0	0	0	0	0	0	0	0	0	0	0	0	0	0	0	0	0
Olfr437_chr6_43163282_43169861_(+)	Olfr437	chr6	43163282	43169861	+	0	0	0	0	0	0	0	0	0	0	0	0	0	0	0	0	0	0	0	0	0	0	0	0	0	0	0	0	0	0
Olfr13_chr6_43172140_43177460_(+)	Olfr13	chr6	43172140	43177460	+	0	0	0	0	0	0	0	0	0	0	0	0	0	0	0	0	0	0	0	0	0	0	0	0	0	0	0	0	0	0
Olfr436-ps1_chr6_43187171_43187696_(+)	Olfr436-ps1	chr6	43187171	43187696	+	0	0	0	0	0	0	0	0	0	0	0	0	0	0	0	0	0	0	0	0	0	0	0	0	0	0	0	0	0	0
Olfr435_chr6_43197146_43203629_(+)	Olfr435	chr6	43197146	43203629	+	0	0	0	0	0	0	0	0	0	0	0	0	0	0	0	0	0	0	0	0	0	0	0	0	0	0	0	0	0	0
Gm21827_chr6_43210333_43210755_(+)	Gm21827	chr6	43210333	43210755	+	0	0	0	0	0	0	0	0	0	0	0	0	0	0	0	0	0	0	0	0	0	0	0	0	0	0	0	0	0	0
Olfr434_chr6_43213021_43218113_(+)	Olfr434	chr6	43213021	43218113	+	0	0	0	0	0	0	0	0	0	0	0	0	0	0	0	0	0	0	0	0	0	0	0	0	0	0	0	0	0	0
Olfr47_chr6_43231529_43236959_(+)	Olfr47	chr6	43231529	43236959	+	0	0	0	0	0	0	0	0	0	0	0	0	0	0	0	0	0	0	0	0	0	0	0	0	0	0	0	0	0	0
Gm44731_chr6_43264542_43265855_(-)	Gm44731	chr6	43264542	43265855	-	2	0	0	1	0	1	3	0	0	0	0	0	0	0	0	0	0	0	0	0	0	0	1	0	0	0	0	0	1	0
Arhgef5_chr6_43265582_43289320_(+)	Arhgef5	chr6	43265582	43289320	+	70	31	77	18	73	21	43	12	15	11	26	11	32	8	12	11	9	9	17	12	15	10	29	16	17	13	16	5	16	10
Gm44253_chr6_43277755_43278382_(+)	Gm44253	chr6	43277755	43278382	+	0	1	1	0	0	1	2	0	0	0	1	0	0	0	0	0	0	1	0	1	0	0	1	0	2	0	0	0	1	0
Nobox_chr6_43303674_43309554_(-)	Nobox	chr6	43303674	43309554	-	1	0	1	0	3	0	0	0	0	0	0	0	0	0	0	1	1	0	0	0	3	0	1	1	0	0	2	0	1	0
Tpk1_chr6_43345001_43666278_(-)	Tpk1	chr6	43345001	43666278	-	773	113	1043	136	914	113	902	134	165	57	339	120	281	83	346	152	230	73	629	145	488	153	470	173	506	197	524	137	531	183
Gm15550_chr6_43373805_43375552_(+)	Gm15550	chr6	43373805	43375552	+	0	0	0	0	0	0	0	0	0	0	0	0	0	0	0	0	0	0	0	0	0	0	0	0	0	0	0	0	0	0
9430018G01Rik_chr6_43467979_43474318_(+)	9430018G01Rik	chr6	43467979	43474318	+	0	0	0	0	0	0	0	0	0	0	0	0	0	0	0	0	0	0	0	0	1	0	0	0	0	0	0	0	0	0
Gm5990_chr6_43766565_43767310_(-)	Gm5990	chr6	43766565	43767310	-	0	0	0	0	0	0	0	0	0	0	0	0	0	0	0	0	0	0	0	0	0	0	0	0	0	0	0	0	0	0
Gm7783_chr6_43856124_43856904_(-)	Gm7783	chr6	43856124	43856904	-	0	1	1	0	0	1	2	2	1	0	0	0	0	0	0	0	0	0	0	0	3	1	0	0	0	1	0	0	0	0
Gm22939_chr6_43887194_43887324_(+)	Gm22939	chr6	43887194	43887324	+	0	0	0	0	0	0	0	0	0	0	0	0	0	0	0	0	0	0	0	0	0	0	0	0	0	0	0	0	0	0
Gm35216_chr6_44080488_44083355_(-)	Gm35216	chr6	44080488	44083355	-	0	0	0	0	0	0	0	0	0	0	0	0	0	0	0	0	0	0	0	0	0	0	0	0	0	0	0	0	0	0
Gm44211_chr6_44667291_44667435_(-)	Gm44211	chr6	44667291	44667435	-	0	0	0	0	0	0	0	0	0	0	0	0	0	0	0	0	0	0	0	0	0	0	0	0	0	0	0	0	0	0
Gm44212_chr6_44821571_44822467_(+)	Gm44212	chr6	44821571	44822467	+	0	0	0	0	0	0	0	0	0	0	0	0	0	0	0	0	0	0	0	0	0	0	0	0	0	0	0	0	0	0
Gm44213_chr6_44965923_44966625_(+)	Gm44213	chr6	44965923	44966625	+	0	0	0	0	0	0	0	0	0	0	0	0	0	0	0	0	0	0	0	0	0	0	0	0	0	0	0	0	0	0
Cntnap2_chr6_45059357_47304213_(+)	Cntnap2	chr6	45059357	47304213	+	85	23	121	28	117	19	94	15	26	11	30	14	32	13	23	18	17	13	58	39	59	40	45	30	55	31	63	29	67	46
B230112I24Rik_chr6_45073566_45074794_(+)	B230112I24Rik	chr6	45073566	45074794	+	0	0	0	0	0	0	0	0	0	0	0	0	0	0	0	0	0	0	0	0	0	0	0	0	0	0	0	0	0	0
Gm43879_chr6_45080746_45084505_(+)	Gm43879	chr6	45080746	45084505	+	0	0	0	0	0	0	0	0	0	0	0	0	0	0	0	0	0	1	0	0	0	0	0	0	0	0	0	0	0	0
Gm43872_chr6_45135270_45137482_(+)	Gm43872	chr6	45135270	45137482	+	0	0	0	0	0	0	0	0	0	0	0	0	0	0	0	0	0	0	0	0	0	0	0	0	0	0	0	0	0	0
Gm43885_chr6_45194876_45197417_(+)	Gm43885	chr6	45194876	45197417	+	0	0	0	0	0	0	0	0	0	0	0	0	0	0	0	0	0	0	0	0	0	0	0	0	0	0	0	0	0	0
Gm43889_chr6_45203810_45207490_(+)	Gm43889	chr6	45203810	45207490	+	0	0	0	0	0	0	0	0	0	0	0	0	0	0	0	0	0	0	0	0	0	0	0	0	0	0	0	0	0	0
Gm43874_chr6_45245637_45248434_(+)	Gm43874	chr6	45245637	45248434	+	0	0	0	0	0	0	0	0	0	0	0	0	0	0	0	0	0	0	0	0	0	0	0	0	0	0	0	0	0	0
Gm43869_chr6_45301103_45302507_(+)	Gm43869	chr6	45301103	45302507	+	0	0	0	0	0	0	0	0	0	0	0	0	0	0	0	0	0	0	0	0	0	0	0	0	0	0	0	0	0	0
6330419E04Rik_chr6_45306124_45307386_(+)	6330419E04Rik	chr6	45306124	45307386	+	0	0	0	0	0	0	0	0	0	0	0	0	0	0	0	0	0	0	0	0	0	0	0	0	0	0	0	0	0	0
Gm43882_chr6_45326402_45328665_(+)	Gm43882	chr6	45326402	45328665	+	0	0	0	0	0	0	0	0	0	0	0	0	0	0	0	0	0	0	0	0	0	0	0	0	0	0	0	0	0	0
Gm43884_chr6_45329238_45329796_(+)	Gm43884	chr6	45329238	45329796	+	0	0	0	0	0	0	0	0	0	0	0	0	0	0	0	0	0	0	0	0	0	0	0	0	0	0	0	0	0	0
Gm43880_chr6_45413235_45415396_(+)	Gm43880	chr6	45413235	45415396	+	0	0	0	0	0	0	0	0	0	0	0	0	0	0	0	0	0	0	0	0	0	0	0	0	0	0	0	0	0	0
Gm43876_chr6_45529083_45532311_(+)	Gm43876	chr6	45529083	45532311	+	0	0	0	0	1	0	1	0	1	0	0	0	0	0	0	0	0	0	0	0	0	0	0	0	0	0	0	0	0	0
Gm43886_chr6_45901938_45904323_(+)	Gm43886	chr6	45901938	45904323	+	0	0	0	0	0	0	0	0	0	0	0	0	0	0	0	0	0	0	0	0	0	0	0	0	0	0	0	0	0	0
Gm22839_chr6_46037776_46038079_(+)	Gm22839	chr6	46037776	46038079	+	0	0	0	0	0	0	0	0	0	0	0	0	0	0	0	0	0	0	0	0	0	0	0	0	0	0	0	0	0	0
Gm43871_chr6_46041951_46043905_(+)	Gm43871	chr6	46041951	46043905	+	0	0	0	0	0	0	0	0	0	0	0	0	0	0	0	0	0	0	0	0	0	0	0	0	0	0	0	0	0	0
Gm43873_chr6_46045143_46049080_(+)	Gm43873	chr6	46045143	46049080	+	0	0	0	0	0	0	0	0	0	0	0	0	0	0	0	0	0	0	0	0	0	0	0	0	0	0	0	0	0	0
Gm43877_chr6_46049158_46051395_(+)	Gm43877	chr6	46049158	46051395	+	0	0	0	0	0	0	0	0	0	0	0	0	0	0	0	0	0	0	0	0	0	0	0	0	0	0	0	0	0	0
Gm43888_chr6_46072409_46074995_(+)	Gm43888	chr6	46072409	46074995	+	0	0	0	0	0	0	0	0	0	0	0	0	0	0	0	0	0	0	0	0	0	0	0	0	0	0	0	0	0	0
Gm43887_chr6_46076179_46079364_(+)	Gm43887	chr6	46076179	46079364	+	0	0	0	0	0	0	0	0	0	0	0	0	0	0	1	0	0	0	0	0	0	0	0	0	0	0	0	0	0	0
Gm43870_chr6_46134102_46138470_(+)	Gm43870	chr6	46134102	46138470	+	0	0	0	0	0	0	0	0	0	0	0	0	0	0	0	0	0	0	0	0	0	0	0	0	0	0	0	0	0	0
Gm43881_chr6_46413756_46416285_(+)	Gm43881	chr6	46413756	46416285	+	0	0	0	0	0	0	0	0	0	0	0	0	0	0	0	0	0	0	0	0	0	0	0	0	0	0	0	0	0	0
Gm25161_chr6_46481709_46481840_(-)	Gm25161	chr6	46481709	46481840	-	0	0	0	0	0	0	0	0	0	0	0	0	0	0	0	0	0	0	0	0	0	0	0	0	0	0	0	0	0	0
Gm43875_chr6_46486643_46489117_(+)	Gm43875	chr6	46486643	46489117	+	0	0	0	0	0	0	0	0	0	0	0	0	0	0	0	0	0	0	0	0	0	0	0	0	0	0	0	0	0	0
Rbpj-ps3_chr6_46529354_46530794_(-)	Rbpj-ps3	chr6	46529354	46530794	-	6	0	8	0	4	0	2	0	3	0	4	0	2	0	7	0	3	0	5	0	8	0	2	0	6	0	5	0	2	0
Gm18484_chr6_46637292_46638282_(-)	Gm18484	chr6	46637292	46638282	-	0	0	0	0	0	0	0	0	0	0	0	0	0	0	0	0	0	0	0	0	0	0	0	0	0	0	0	0	0	0
Gm35931_chr6_46778409_46778856_(-)	Gm35931	chr6	46778409	46778856	-	0	0	0	0	0	0	0	0	0	0	0	0	0	0	0	0	0	0	0	0	0	0	0	0	0	0	0	0	0	0
Gm43883_chr6_46785953_46789702_(+)	Gm43883	chr6	46785953	46789702	+	0	0	0	0	0	0	0	0	0	0	0	0	0	0	0	0	0	0	0	0	0	0	0	0	0	0	0	0	0	0
Gm6352_chr6_47045156_47046289_(+)	Gm6352	chr6	47045156	47046289	+	0	0	1	0	0	0	0	0	0	0	0	0	1	0	0	0	0	0	0	0	0	0	1	0	0	0	0	0	0	1
Gm18584_chr6_47432126_47433089_(-)	Gm18584	chr6	47432126	47433089	-	0	0	0	0	0	0	0	0	1	0	0	0	0	0	0	0	0	0	0	0	1	0	2	0	0	0	1	0	2	0
Cul1_chr6_47453398_47526139_(+)	Cul1	chr6	47453398	47526139	+	668	267	765	277	663	271	526	163	116	80	196	125	198	132	115	71	125	80	318	182	262	109	262	188	235	152	260	157	246	132
A930035D04Rik_chr6_47453776_47454320_(-)	A930035D04Rik	chr6	47453776	47454320	-	0	0	0	0	0	0	1	0	0	0	0	0	1	0	0	0	0	0	0	0	0	0	0	1	0	0	2	0	0	0
Ezh2_chr6_47530139_47595341_(-)	Ezh2	chr6	47530139	47595341	-	1206	393	1329	416	1163	393	1195	424	326	196	551	258	447	221	669	356	386	208	1102	496	1057	507	738	411	802	423	999	416	1048	469
Gm44282_chr6_47585216_47585405_(+)	Gm44282	chr6	47585216	47585405	+	0	0	0	0	0	0	0	0	0	0	0	0	0	0	0	0	0	0	0	0	0	0	0	0	0	0	0	0	0	0
Gm44141_chr6_47635297_47636879_(+)	Gm44141	chr6	47635297	47636879	+	0	0	0	0	0	0	0	0	0	0	0	0	0	0	0	0	0	0	0	0	0	0	0	0	0	0	0	0	0	0
Gm25283_chr6_47637143_47637219_(+)	Gm25283	chr6	47637143	47637219	+	0	0	0	0	0	0	0	0	0	0	0	0	0	0	0	0	0	0	0	0	0	0	0	0	0	0	0	0	0	0
Rny3_chr6_47781624_47781725_(+)	Rny3	chr6	47781624	47781725	+	0	0	0	0	0	0	0	0	0	0	0	0	0	0	0	0	0	0	0	0	0	0	0	0	0	0	0	0	0	0
Rpl31-ps7_chr6_47785996_47786374_(-)	Rpl31-ps7	chr6	47785996	47786374	-	0	0	0	0	0	0	0	0	0	0	0	0	0	0	0	0	0	0	0	0	1	0	0	0	0	0	0	0	0	0
Rny1_chr6_47788069_47788180_(-)	Rny1	chr6	47788069	47788180	-	1	0	2	0	0	0	1	0	0	0	0	0	0	0	0	0	0	0	0	0	1	0	3	0	1	0	3	0	1	0
Pdia4_chr6_47796141_47813430_(-)	Pdia4	chr6	47796141	47813430	-	436	47	541	54	414	43	463	45	129	19	180	20	150	22	224	31	200	15	489	44	407	35	326	31	353	40	374	34	438	51
Mir704_chr6_47803576_47803652_(-)	Mir704	chr6	47803576	47803652	-	0	0	0	0	0	0	0	0	0	0	0	0	0	0	0	0	0	0	0	0	0	0	0	0	0	0	0	0	0	0
Rpl35a-ps7_chr6_47815300_47815632_(-)	Rpl35a-ps7	chr6	47815300	47815632	-	0	0	0	1	0	1	0	0	0	0	0	0	0	0	0	0	0	0	0	0	1	4	1	0	0	1	0	0	0	0
Zfp786_chr6_47819266_47830867_(-)	Zfp786	chr6	47819266	47830867	-	18	4	16	11	16	6	19	8	4	6	2	2	3	2	4	4	7	2	14	10	13	6	19	11	9	7	10	2	8	4
Zfp398_chr6_47835661_47873537_(+)	Zfp398	chr6	47835661	47873537	+	93	57	91	56	81	29	97	54	22	29	33	24	17	9	29	31	32	27	51	33	65	45	43	39	37	44	46	37	52	57
Gm44041_chr6_47847743_47848138_(+)	Gm44041	chr6	47847743	47848138	+	2	1	1	1	1	0	1	0	0	0	0	0	1	0	0	0	0	1	0	0	1	0	0	1	0	0	0	1	1	1
Zfp282_chr6_47877204_47908485_(+)	Zfp282	chr6	47877204	47908485	+	80	24	68	16	70	11	57	11	24	11	29	8	20	8	29	13	20	2	39	14	37	8	47	14	34	19	34	9	43	9
Zfp212_chr6_47920476_47932639_(+)	Zfp212	chr6	47920476	47932639	+	78	48	76	70	70	64	84	63	19	21	34	20	22	27	34	37	26	20	53	66	54	45	63	62	58	51	49	42	55	64
Zfp783_chr6_47943171_47955913_(+)	Zfp783	chr6	47943171	47955913	+	48	5	52	9	42	3	35	10	9	3	7	2	15	1	7	3	11	5	13	1	15	4	20	4	14	6	18	2	20	3
Zfp956_chr6_47953390_47965300_(+)	Zfp956	chr6	47953390	47965300	+	47	11	63	8	46	9	57	16	11	4	14	12	15	7	16	8	17	3	35	18	22	13	35	13	38	17	37	8	27	9
Gm6443_chr6_47977003_47977876_(-)	Gm6443	chr6	47977003	47977876	-	0	2	0	1	0	0	0	0	1	0	0	1	0	0	0	2	0	1	0	0	0	1	0	1	0	1	0	2	0	2
Zfp777_chr6_48024188_48048911_(-)	Zfp777	chr6	48024188	48048911	-	160	57	176	61	183	67	171	63	53	27	68	27	88	30	69	50	60	26	90	40	61	38	86	40	86	52	65	43	91	38
Gm45738_chr6_48045548_48045955_(-)	Gm45738	chr6	48045548	48045955	-	1	0	4	0	2	1	3	0	1	0	0	0	2	0	0	0	1	0	2	0	0	0	2	0	1	0	1	0	0	0
Gm24563_chr6_48048703_48048795_(+)	Gm24563	chr6	48048703	48048795	+	0	0	0	0	0	0	0	0	0	0	0	0	0	0	0	0	0	0	0	0	0	0	0	0	0	0	0	0	0	0
Zfp746_chr6_48062395_48086593_(-)	Zfp746	chr6	48062395	48086593	-	67	24	69	27	70	24	55	28	20	5	35	14	11	13	28	12	20	12	27	7	22	28	36	19	36	30	28	7	30	33
Gm16630_chr6_48130906_48159280_(-)	Gm16630	chr6	48130906	48159280	-	1	1	0	0	0	0	0	0	0	0	0	0	0	0	0	0	0	0	0	0	1	0	0	0	0	0	0	0	0	0
Gm22122_chr6_48289228_48289427_(+)	Gm22122	chr6	48289228	48289427	+	0	0	0	0	0	0	0	0	0	0	0	0	0	0	0	0	0	0	0	0	0	0	0	0	0	0	0	0	0	0
Gm44696_chr6_48374136_48395408_(-)	Gm44696	chr6	48374136	48395408	-	30	1	15	1	10	0	15	1	2	0	3	0	1	1	1	1	2	1	14	0	3	1	11	1	6	0	3	1	4	0
Gm7880_chr6_48381190_48382060_(-)	Gm7880	chr6	48381190	48382060	-	1	0	0	0	0	0	0	0	0	0	0	0	0	0	0	0	0	0	0	0	0	0	0	0	0	0	0	0	0	0
Krba1_chr6_48395586_48419781_(+)	Krba1	chr6	48395586	48419781	+	278	83	283	57	256	88	239	64	81	26	108	29	85	31	110	45	76	31	166	71	141	51	189	70	152	64	123	42	126	55
Gm24325_chr6_48420769_48420842_(+)	Gm24325	chr6	48420769	48420842	+	1	0	0	0	0	0	0	0	0	0	0	0	1	0	0	0	0	0	0	0	0	0	0	0	0	0	0	0	0	0
Zfp467_chr6_48427697_48445825_(-)	Zfp467	chr6	48427697	48445825	-	9	1	5	2	9	2	2	0	8	0	5	0	2	0	0	0	2	0	6	4	8	2	1	0	4	2	3	0	4	0
Sspo_chr6_48448229_48501250_(+)	Sspo	chr6	48448229	48501250	+	4	0	4	1	4	2	9	5	2	3	6	3	2	7	6	3	7	0	4	4	7	6	2	4	3	4	2	3	4	6
Zfp862-ps_chr6_48504337_48534832_(+)	Zfp862-ps	chr6	48504337	48534832	+	86	26	126	23	112	24	118	33	23	19	40	21	35	15	32	17	36	13	69	33	68	25	70	42	61	39	53	22	72	35
Gm10243_chr6_48523518_48523850_(+)	Gm10243	chr6	48523518	48523850	+	0	0	0	0	0	0	0	0	0	0	0	0	0	0	0	0	0	0	0	0	0	0	0	0	0	0	0	0	0	0
Gm7887_chr6_48524554_48525090_(-)	Gm7887	chr6	48524554	48525090	-	0	0	0	0	0	0	0	0	0	0	0	0	0	0	0	0	0	0	0	0	0	0	0	0	0	0	0	0	0	0
1700026J14Rik_chr6_48536582_48537474_(-)	1700026J14Rik	chr6	48536582	48537474	-	1	0	0	0	2	0	0	0	0	0	0	0	0	0	0	0	0	0	0	0	0	0	0	1	0	0	0	0	0	0
Atp6v0e2_chr6_48537615_48541801_(+)	Atp6v0e2	chr6	48537615	48541801	+	27	3	36	2	31	3	23	2	2	1	12	2	2	0	10	2	2	0	19	4	9	0	11	4	15	1	9	2	15	2
Lrrc61_chr6_48554796_48570722_(+)	Lrrc61	chr6	48554796	48570722	+	48	15	28	5	30	6	38	7	11	4	26	10	17	6	28	10	11	5	35	5	32	11	32	8	32	9	24	1	43	9
AC154013.1_chr6_48564365_48566137_(+)	AC154013.1	chr6	48564365	48566137	+	10	0	11	0	1	0	10	0	3	0	3	0	2	0	7	1	3	0	3	0	6	0	9	0	10	0	11	0	8	0
Rarres2_chr6_48569696_48572789_(-)	Rarres2	chr6	48569696	48572789	-	0	0	0	0	0	0	0	0	0	0	0	0	0	0	0	0	0	0	0	0	0	0	0	0	0	0	0	0	0	0
Gm5111_chr6_48589445_48590584_(+)	Gm5111	chr6	48589445	48590584	+	0	0	0	0	0	0	0	0	0	0	0	0	0	0	0	0	0	0	0	0	0	0	0	0	0	0	0	0	0	0
Gm45021_chr6_48589610_48613250_(+)	Gm45021	chr6	48589610	48613250	+	38	12	23	6	39	10	33	6	9	5	18	5	7	7	21	7	21	4	40	9	38	9	30	13	42	12	19	12	30	13
Repin1_chr6_48593883_48599082_(+)	Repin1	chr6	48593883	48599082	+	45	0	39	0	33	0	28	0	7	0	11	1	16	0	10	0	16	0	17	0	15	0	18	0	19	0	22	0	11	0
Gm44965_chr6_48593941_48619278_(+)	Gm44965	chr6	48593941	48619278	+	3	1	3	1	3	3	4	2	1	3	2	0	2	0	1	2	2	3	2	0	7	3	3	3	6	3	4	0	1	3
Zfp775_chr6_48602063_48623227_(+)	Zfp775	chr6	48602063	48623227	+	33	10	12	11	20	6	18	4	9	2	13	5	5	3	14	8	7	14	20	9	29	12	20	17	19	13	16	5	19	12
Gm38804_chr6_48613973_48622357_(-)	Gm38804	chr6	48613973	48622357	-	4	0	2	0	3	0	1	0	0	0	0	0	1	0	4	0	0	0	5	0	1	0	0	0	2	0	1	0	2	0
AI854703_chr6_48626764_48633689_(+)	AI854703	chr6	48626764	48633689	+	8	1	3	0	5	1	1	1	0	0	0	1	1	0	2	1	0	0	7	0	4	0	1	1	4	0	3	0	6	0
Gimap8_chr6_48647234_48660875_(+)	Gimap8	chr6	48647234	48660875	+	0	0	1	0	0	0	1	0	0	0	0	0	0	0	0	0	0	0	0	0	1	0	1	1	0	1	0	0	0	0
Gm44262_chr6_48665403_48665860_(-)	Gm44262	chr6	48665403	48665860	-	0	0	0	0	0	0	0	0	0	0	0	0	0	0	0	0	0	0	0	0	0	0	0	0	0	0	0	0	0	0
Gimap9_chr6_48676129_48679114_(+)	Gimap9	chr6	48676129	48679114	+	3	0	3	6	4	6	2	3	1	0	0	0	0	2	0	0	0	1	1	2	1	5	1	2	1	5	3	5	1	5
Gimap4_chr6_48684549_48692060_(+)	Gimap4	chr6	48684549	48692060	+	2	0	3	0	1	0	2	0	1	1	2	0	1	0	0	0	1	0	0	0	0	0	2	0	2	0	1	0	2	0
Gimap6_chr6_48701582_48708225_(-)	Gimap6	chr6	48701582	48708225	-	0	0	0	0	0	0	0	0	0	0	0	0	0	0	0	0	0	0	0	0	0	0	1	0	0	0	0	0	0	0
Gm28053_chr6_48718607_48752644_(+)	Gm28053	chr6	48718607	48752644	+	1	0	1	0	1	0	1	0	0	0	0	0	0	0	0	0	0	0	1	0	0	1	0	0	0	0	1	1	1	0
Gimap7_chr6_48718621_48724636_(+)	Gimap7	chr6	48718621	48724636	+	0	0	0	0	0	0	0	0	0	0	0	0	0	0	0	0	0	0	0	0	0	0	0	0	0	0	0	0	0	0
Gimap1os_chr6_48738346_48741444_(-)	Gimap1os	chr6	48738346	48741444	-	0	0	0	0	0	0	0	0	0	0	0	0	0	0	0	0	0	0	0	0	0	0	1	0	2	0	0	0	0	0
Gimap1_chr6_48739054_48743795_(+)	Gimap1	chr6	48739054	48743795	+	0	0	0	0	0	0	0	0	0	0	0	0	0	0	0	0	0	0	0	0	0	0	0	0	0	0	0	0	0	0
Gimap5_chr6_48746197_48754210_(+)	Gimap5	chr6	48746197	48754210	+	0	0	0	0	0	0	0	0	1	0	0	0	0	0	0	0	0	0	1	0	0	0	0	0	0	0	0	0	0	0
Gm44226_chr6_48754230_48755986_(-)	Gm44226	chr6	48754230	48755986	-	0	0	1	0	0	0	0	0	0	0	0	0	0	0	0	0	0	0	0	0	0	0	0	0	0	0	0	0	0	0
4833403J16Rik_chr6_48755338_48756368_(+)	4833403J16Rik	chr6	48755338	48756368	+	0	0	0	0	0	0	0	0	0	0	0	0	0	0	0	0	0	0	0	0	0	0	0	0	0	0	0	0	0	0
Gimap3_chr6_48764464_48770851_(-)	Gimap3	chr6	48764464	48770851	-	0	0	0	0	0	0	1	0	0	0	0	0	0	0	0	0	0	0	0	0	0	0	0	0	0	0	0	0	0	0
Gm30781_chr6_48798280_48798826_(-)	Gm30781	chr6	48798280	48798826	-	0	0	0	0	0	0	0	0	0	0	0	0	0	0	0	0	0	0	0	0	0	0	0	0	0	0	0	0	0	0
Gm17834_chr6_48819024_48820467_(+)	Gm17834	chr6	48819024	48820467	+	0	0	0	0	0	0	0	0	0	0	0	0	0	0	0	0	0	0	0	0	0	0	0	0	0	0	0	0	0	0
Tmem176b_chr6_48833818_48841496_(-)	Tmem176b	chr6	48833818	48841496	-	4	0	0	0	0	0	0	0	1	0	0	0	0	1	1	0	0	0	0	1	1	0	0	0	0	0	0	0	1	0
Tmem176a_chr6_48840919_48847071_(+)	Tmem176a	chr6	48840919	48847071	+	1	0	1	0	0	0	0	0	0	0	0	0	0	0	0	0	0	0	0	0	0	0	1	0	0	0	0	0	0	0
Gm44764_chr6_48847659_48863107_(-)	Gm44764	chr6	48847659	48863107	-	3	1	0	0	0	0	0	0	0	0	0	1	0	0	0	0	0	0	2	1	0	0	0	0	0	0	0	0	0	1
Gm7932_chr6_48860329_48866083_(+)	Gm7932	chr6	48860329	48866083	+	2	0	2	0	2	1	3	0	0	0	2	0	0	0	0	1	0	0	2	2	0	0	0	2	3	0	2	2	1	0
Aoc1_chr6_48872896_48909188_(+)	Aoc1	chr6	48872896	48909188	+	1	0	1	1	0	1	2	1	1	1	0	0	0	2	0	1	1	0	0	0	0	1	1	0	0	1	0	0	0	1
Doxl1_chr6_48929895_48933687_(+)	Doxl1	chr6	48929895	48933687	+	0	0	0	0	0	0	0	0	0	0	0	0	0	0	0	0	0	0	1	0	0	0	0	0	0	0	0	0	0	0
Gm24348_chr6_48934794_48934923_(+)	Gm24348	chr6	48934794	48934923	+	0	0	0	0	0	0	0	0	0	0	0	0	0	0	0	0	0	0	0	0	0	0	0	0	0	0	0	0	0	0
Gm10242_chr6_48939798_48940127_(-)	Gm10242	chr6	48939798	48940127	-	0	0	0	0	0	0	0	0	0	0	0	0	0	0	0	0	0	0	0	0	0	0	0	0	0	0	0	0	0	0
Gm18538_chr6_48956358_48956841_(+)	Gm18538	chr6	48956358	48956841	+	0	0	0	0	0	0	0	0	0	0	0	0	0	0	0	0	0	0	0	0	0	0	0	0	0	0	0	0	0	0
Gm19172_chr6_48962883_48964128_(+)	Gm19172	chr6	48962883	48964128	+	0	0	0	0	0	0	0	0	0	0	0	0	0	0	0	0	0	0	0	0	0	0	0	0	0	0	0	0	0	0
Doxl2_chr6_48974963_48978746_(+)	Doxl2	chr6	48974963	48978746	+	0	0	0	0	0	0	0	0	0	0	0	0	0	0	0	0	0	0	0	0	0	0	0	0	0	0	0	0	0	0
Gm18539_chr6_48981120_48982209_(+)	Gm18539	chr6	48981120	48982209	+	0	0	0	0	0	0	0	0	0	0	0	0	0	0	0	0	0	0	0	0	0	0	0	0	0	0	0	0	0	0
4930563H07Rik_chr6_48986616_48999616_(-)	4930563H07Rik	chr6	48986616	48999616	-	0	0	0	0	0	0	0	0	0	0	0	0	0	0	0	0	0	0	0	0	0	0	0	0	0	0	0	0	0	0
Svs1_chr6_48986861_48991722_(+)	Svs1	chr6	48986861	48991722	+	0	0	0	0	0	0	0	0	0	0	0	0	0	0	0	0	0	0	0	0	0	0	0	0	0	0	0	0	0	0
Gm19173_chr6_48995224_48997653_(+)	Gm19173	chr6	48995224	48997653	+	0	0	0	0	0	0	0	0	0	0	0	0	0	0	0	0	0	0	0	0	0	0	0	0	0	0	0	0	0	0
Gpnmb_chr6_49036546_49070929_(+)	Gpnmb	chr6	49036546	49070929	+	10	1	11	1	8	1	1	0	3	0	4	0	8	2	4	3	2	2	4	1	4	0	3	2	6	3	2	1	3	1
Gm19253_chr6_49071630_49071936_(+)	Gm19253	chr6	49071630	49071936	+	0	0	0	0	0	0	0	0	0	0	0	0	0	0	0	0	0	0	0	0	0	0	0	0	0	0	0	0	0	0
Malsu1_chr6_49073795_49086751_(+)	Malsu1	chr6	49073795	49086751	+	151	8	128	7	115	5	112	11	39	2	75	7	62	3	54	2	37	2	96	6	94	13	85	9	86	7	70	4	105	6
Gm7890_chr6_49080462_49081062_(-)	Gm7890	chr6	49080462	49081062	-	1	0	1	0	0	0	1	0	0	0	2	1	1	0	0	0	1	1	0	0	0	0	1	1	0	0	0	0	0	0
Igf2bp3_chr6_49085223_49214957_(-)	Igf2bp3	chr6	49085223	49214957	-	1077	309	1136	298	1102	323	413	113	510	239	739	293	513	285	464	234	465	248	331	210	318	182	354	246	503	297	283	150	293	173
Gm18010_chr6_49172759_49172960_(+)	Gm18010	chr6	49172759	49172960	+	0	0	0	0	0	0	0	0	0	0	0	0	0	0	0	0	0	0	0	0	0	0	0	0	0	0	0	0	0	0
Tra2a_chr6_49243924_49264033_(-)	Tra2a	chr6	49243924	49264033	-	927	417	859	426	940	446	920	357	370	187	612	273	494	243	893	323	524	231	1295	564	1316	539	655	435	894	495	1144	479	1308	555
Gm43980_chr6_49254851_49256462_(+)	Gm43980	chr6	49254851	49256462	+	0	0	0	0	1	0	1	0	0	0	0	0	0	0	0	0	0	0	0	0	0	0	0	0	0	0	0	0	0	0
Gm18011_chr6_49286721_49287285_(+)	Gm18011	chr6	49286721	49287285	+	0	0	0	0	0	0	0	0	0	0	0	0	0	0	0	0	0	0	0	0	0	0	0	0	0	0	0	0	0	0
Ccdc126_chr6_49319274_49341582_(+)	Ccdc126	chr6	49319274	49341582	+	39	19	31	19	29	18	22	22	4	10	8	13	12	19	9	16	8	13	38	38	45	17	15	33	26	20	30	22	34	22
Fam221a_chr6_49367739_49390539_(+)	Fam221a	chr6	49367739	49390539	+	39	24	45	20	31	10	31	10	14	10	22	11	23	3	34	15	23	15	70	24	37	35	16	29	34	27	18	26	31	34
Stk31_chr6_49395604_49469501_(+)	Stk31	chr6	49395604	49469501	+	50	19	51	28	65	20	49	18	16	8	15	3	19	16	27	10	14	13	97	51	61	40	25	14	53	35	60	35	68	36
Gm17060_chr6_49424061_49424884_(-)	Gm17060	chr6	49424061	49424884	-	0	0	2	0	0	0	1	0	0	0	2	0	0	0	1	1	1	0	2	3	0	0	1	0	1	0	0	0	1	0
Gm5305_chr6_49542982_49543727_(-)	Gm5305	chr6	49542982	49543727	-	0	0	0	0	0	0	0	0	0	1	0	0	0	0	1	2	0	0	0	1	0	0	0	0	0	0	0	0	0	0
Gm44219_chr6_49727251_49727523_(-)	Gm44219	chr6	49727251	49727523	-	1	0	0	0	1	0	0	0	0	0	0	0	0	0	1	0	0	0	0	0	0	0	0	0	0	0	0	0	0	0
Npy_chr6_49822710_49829507_(+)	Npy	chr6	49822710	49829507	+	1	0	1	0	0	0	1	0	0	0	0	0	0	0	1	0	0	0	3	0	0	0	0	0	0	0	0	1	0	1
Gm18007_chr6_49858003_49858846_(-)	Gm18007	chr6	49858003	49858846	-	0	0	0	0	0	0	0	0	0	0	0	0	0	0	0	0	0	0	0	0	0	0	0	0	0	0	0	0	0	0
Gm3455_chr6_50051186_50107628_(+)	Gm3455	chr6	50051186	50107628	+	2	1	2	1	2	0	2	0	1	0	0	0	1	1	0	2	0	0	4	6	4	2	0	0	3	2	9	5	4	0
Mpp6_chr6_50110241_50198939_(+)	Mpp6	chr6	50110241	50198939	+	410	185	441	195	401	192	436	216	125	96	201	170	167	138	159	146	101	117	258	249	238	169	188	188	219	217	210	203	233	183
Gsdme_chr6_50188888_50263862_(-)	Gsdme	chr6	50188888	50263862	-	23	0	15	1	8	1	14	1	4	1	7	3	8	2	4	2	3	1	13	2	8	0	4	1	2	2	9	3	13	4
Osbpl3_chr6_50293330_50456201_(-)	Osbpl3	chr6	50293330	50456201	-	347	108	311	93	270	76	244	66	147	75	203	99	176	77	213	139	190	88	262	173	203	134	165	110	217	129	259	151	229	173
Gm26289_chr6_50539904_50540034_(-)	Gm26289	chr6	50539904	50540034	-	0	0	0	0	0	0	0	0	0	0	0	0	0	0	0	0	0	0	0	0	0	0	0	0	0	0	0	0	0	0
Cycs_chr6_50562563_50566538_(-)	Cycs	chr6	50562563	50566538	-	34	3	23	5	24	4	28	2	12	1	6	0	3	0	10	2	14	2	40	5	27	8	19	6	26	5	20	8	30	6
5430402O13Rik_chr6_50566643_50594865_(+)	5430402O13Rik	chr6	50566643	50594865	+	8	3	3	1	6	4	11	6	2	1	1	3	5	1	1	9	4	1	7	7	6	7	3	6	2	8	4	3	3	7
Mir6371_chr6_50572398_50572508_(+)	Mir6371	chr6	50572398	50572508	+	0	0	0	0	0	0	0	0	0	0	0	0	0	0	0	0	0	0	0	0	0	0	0	0	0	0	0	0	0	0
4921507P07Rik_chr6_50573302_50596632_(-)	4921507P07Rik	chr6	50573302	50596632	-	13	10	3	9	9	5	9	4	2	9	1	2	2	1	0	3	1	2	1	4	3	3	3	4	0	5	5	2	1	8
Gm44054_chr6_50599869_50600240_(+)	Gm44054	chr6	50599869	50600240	+	1	0	0	0	0	0	0	0	0	0	0	0	0	0	0	0	0	0	0	0	0	0	0	0	0	0	0	0	0	0
Gm4782_chr6_50608637_50610682_(+)	Gm4782	chr6	50608637	50610682	+	0	0	0	0	0	0	0	0	0	0	0	0	0	0	0	0	0	0	0	0	0	0	0	0	0	0	0	0	0	0
Gm8035_chr6_50617849_50618535_(-)	Gm8035	chr6	50617849	50618535	-	0	0	0	0	0	0	0	0	0	0	0	0	0	0	0	0	0	0	0	0	0	1	0	0	0	0	0	0	0	0
Gm8038_chr6_50619841_50621884_(-)	Gm8038	chr6	50619841	50621884	-	0	0	0	0	0	0	0	0	0	0	0	0	0	0	0	0	0	0	0	0	0	0	0	0	0	0	0	0	0	0
Gm8039_chr6_50625745_50626456_(-)	Gm8039	chr6	50625745	50626456	-	0	0	0	0	0	0	0	0	0	0	0	0	0	0	0	0	0	0	0	0	0	0	0	0	0	0	0	0	0	0
Gm18765_chr6_50627680_50628339_(-)	Gm18765	chr6	50627680	50628339	-	0	0	0	0	0	0	0	0	0	0	0	0	0	0	0	0	0	0	0	1	0	0	0	0	0	0	0	1	0	0
Npvf_chr6_50650672_50654439_(-)	Npvf	chr6	50650672	50654439	-	0	0	0	0	0	0	0	0	0	0	0	0	0	0	0	0	0	0	0	0	0	0	0	0	0	0	0	0	0	0
Gm3017_chr6_50746687_50747812_(-)	Gm3017	chr6	50746687	50747812	-	0	0	0	0	0	0	0	0	0	0	0	0	0	0	0	0	0	0	0	0	0	0	0	0	0	0	0	0	0	0
C530044C16Rik_chr6_50776115_50815033_(+)	C530044C16Rik	chr6	50776115	50815033	+	0	0	0	1	0	0	0	0	0	0	0	0	0	0	0	0	0	0	1	0	0	0	0	2	0	0	0	0	2	1
Gm44109_chr6_50799072_50803031_(-)	Gm44109	chr6	50799072	50803031	-	0	0	0	0	0	0	0	0	0	0	0	0	0	0	0	0	0	0	0	0	0	0	0	0	0	0	0	0	0	0
AC153376.1_chr6_50846713_50847770_(-)	AC153376.1	chr6	50846713	50847770	-	0	0	0	0	0	0	0	0	0	0	0	0	0	0	0	0	0	0	0	0	0	0	0	0	0	0	0	0	0	0
G930045G22Rik_chr6_50849023_50878077_(-)	G930045G22Rik	chr6	50849023	50878077	-	0	0	0	0	0	0	0	0	0	0	0	0	0	0	0	0	0	0	0	0	0	0	0	0	0	0	0	0	0	0
Gm31579_chr6_50909770_50910735_(+)	Gm31579	chr6	50909770	50910735	+	0	0	0	0	0	0	0	0	0	0	0	0	0	0	0	0	0	0	0	0	0	1	0	0	0	0	0	0	0	0
Gm44402_chr6_50967268_50967505_(+)	Gm44402	chr6	50967268	50967505	+	0	0	0	0	0	0	0	0	0	0	0	0	0	0	0	0	0	0	0	0	0	0	0	0	0	0	0	0	0	0
Mir148a_chr6_51269812_51269910_(-)	Mir148a	chr6	51269812	51269910	-	0	0	0	0	0	0	0	0	0	0	0	0	0	0	0	0	0	0	0	0	0	0	0	0	0	0	0	0	0	0
Gm32479_chr6_51283532_51287855_(-)	Gm32479	chr6	51283532	51287855	-	0	0	0	1	0	0	0	0	0	0	0	0	0	0	0	0	0	0	0	0	0	0	0	0	0	0	0	0	0	0
Gm6559_chr6_51379710_51392791_(+)	Gm6559	chr6	51379710	51392791	+	1	1	0	0	0	0	0	0	0	0	0	0	1	0	0	0	0	0	0	0	3	2	1	0	0	0	0	0	2	0
0610033M10Rik_chr6_51400966_51402219_(-)	0610033M10Rik	chr6	51400966	51402219	-	0	0	0	0	0	0	0	0	0	0	0	0	0	0	0	0	0	0	0	0	0	0	0	0	0	0	0	0	0	0
Nfe2l3_chr6_51432670_51458768_(+)	Nfe2l3	chr6	51432670	51458768	+	4	8	9	2	11	5	8	7	2	2	10	5	3	4	26	16	9	15	12	7	24	17	6	11	12	15	14	19	23	18
Hnrnpa2b1_chr6_51460932_51469894_(-)	Hnrnpa2b1	chr6	51460932	51469894	-	827	715	982	780	818	602	821	567	301	223	368	289	420	359	377	285	285	194	813	651	625	547	755	675	722	655	652	585	677	515
Cbx3_chr6_51470360_51483704_(+)	Cbx3	chr6	51470360	51483704	+	414	54	461	61	435	69	397	52	135	29	197	39	209	35	240	32	194	32	388	45	415	56	373	48	401	54	365	39	410	58
Snx10_chr6_51523901_51590679_(+)	Snx10	chr6	51523901	51590679	+	547	103	562	116	572	108	586	123	206	83	289	98	286	111	404	154	310	112	600	214	511	158	464	149	532	182	480	166	539	210
Gm22914_chr6_51621632_51621708_(+)	Gm22914	chr6	51621632	51621708	+	0	0	0	0	0	0	0	0	0	0	0	0	0	0	0	0	0	0	0	0	0	0	0	0	0	0	0	0	0	0
Gm38811_chr6_51694309_51711081_(-)	Gm38811	chr6	51694309	51711081	-	0	0	1	0	0	0	0	0	0	1	0	0	0	0	0	0	0	0	0	0	1	0	0	0	0	0	0	0	1	0
Skap2_chr6_51857422_52012549_(-)	Skap2	chr6	51857422	52012549	-	309	82	331	84	327	65	312	77	105	42	169	57	124	62	194	114	149	71	229	119	238	112	150	103	221	96	243	87	271	119
Gm44077_chr6_52012601_52026986_(+)	Gm44077	chr6	52012601	52026986	+	13	2	18	0	7	2	10	4	2	0	3	2	2	1	5	1	6	1	0	1	10	2	6	2	11	2	7	4	9	1
Halr1_chr6_52102949_52113684_(+)	Halr1	chr6	52102949	52113684	+	177	29	85	20	78	15	182	31	12	0	27	6	12	2	13	5	13	3	70	23	49	16	18	6	21	0	48	12	40	10
Rps8-ps3_chr6_52118242_52118891_(+)	Rps8-ps3	chr6	52118242	52118891	+	5	0	3	0	1	0	5	1	0	0	1	0	1	0	0	0	0	0	1	0	0	0	3	0	0	0	0	0	0	0
Rps19-ps14_chr6_52131778_52132046_(-)	Rps19-ps14	chr6	52131778	52132046	-	0	0	0	0	0	0	0	0	0	0	0	0	0	0	0	0	0	0	0	0	0	0	0	0	0	0	0	0	0	0
Hoxa1_chr6_52155590_52158317_(-)	Hoxa1	chr6	52155590	52158317	-	1	0	0	0	0	0	0	0	0	0	0	0	0	0	0	0	0	0	0	0	0	0	0	0	0	0	0	0	0	1
Hotairm1_chr6_52156902_52162119_(+)	Hotairm1	chr6	52156902	52162119	+	5	1	1	1	4	5	4	0	0	0	1	1	0	0	0	0	0	0	2	0	0	0	1	2	1	0	2	0	3	0
Gm27867_chr6_52158432_52158556_(+)	Gm27867	chr6	52158432	52158556	+	0	0	0	0	0	0	0	0	0	0	0	0	0	0	0	0	0	0	0	0	0	0	0	0	0	0	0	0	0	0
Gm27861_chr6_52161042_52161255_(+)	Gm27861	chr6	52161042	52161255	+	0	0	0	0	0	0	0	0	0	0	0	0	0	0	0	0	0	0	0	0	0	0	0	0	0	0	0	0	0	0
Gm27868_chr6_52162010_52162111_(+)	Gm27868	chr6	52162010	52162111	+	0	0	0	0	0	0	0	0	0	0	0	0	0	0	0	0	0	0	0	0	0	0	0	0	0	0	0	0	0	0
Gm27477_chr6_52162125_52162267_(+)	Gm27477	chr6	52162125	52162267	+	0	0	0	0	0	0	0	0	0	0	0	0	0	0	0	0	0	0	0	0	0	0	0	0	0	0	0	0	0	0
Hoxa2_chr6_52162417_52164831_(-)	Hoxa2	chr6	52162417	52164831	-	1	0	0	0	1	0	0	0	0	0	0	0	0	0	1	0	0	0	0	0	0	0	0	0	0	0	0	0	0	0
Gm28308_chr6_52163359_52213339_(-)	Gm28308	chr6	52163359	52213339	-	3	0	0	0	0	1	0	1	0	0	0	0	0	0	0	0	0	0	0	0	0	0	1	0	1	0	0	0	0	1
Hoxaas2_chr6_52165674_52169564_(+)	Hoxaas2	chr6	52165674	52169564	+	0	0	0	0	1	0	0	0	0	0	0	0	0	0	0	0	0	0	0	0	0	0	0	0	0	0	0	0	0	0
Hoxa3_chr6_52169062_52213336_(-)	Hoxa3	chr6	52169062	52213336	-	1	0	0	0	0	0	0	0	1	0	1	0	0	0	0	0	0	0	0	0	0	0	0	0	0	0	0	0	0	0
Gm15050_chr6_52172881_52174059_(+)	Gm15050	chr6	52172881	52174059	+	0	0	0	0	0	0	0	0	0	0	0	0	0	0	0	0	0	0	0	0	0	0	0	0	0	0	0	0	0	0
Hoxaas3_chr6_52175217_52215076_(+)	Hoxaas3	chr6	52175217	52215076	+	5	3	0	0	2	1	0	0	0	0	0	0	0	0	0	0	0	1	1	0	0	0	0	0	0	0	0	0	0	0
5730596B20Rik_chr6_52177498_52180851_(+)	5730596B20Rik	chr6	52177498	52180851	+	3	1	0	0	1	1	0	0	1	0	0	0	0	0	0	0	0	0	0	0	0	0	0	0	0	0	0	0	0	0
Gm29430_chr6_52183110_52189925_(+)	Gm29430	chr6	52183110	52189925	+	0	0	0	0	0	0	0	0	0	0	0	0	0	0	0	0	0	0	0	0	0	0	0	0	0	0	0	0	0	0
Hoxa4_chr6_52189671_52191753_(-)	Hoxa4	chr6	52189671	52191753	-	1	0	0	0	1	0	0	0	0	0	0	0	0	0	0	0	0	0	0	0	0	0	0	0	0	0	0	0	0	0
Hoxa5_chr6_52201754_52204587_(-)	Hoxa5	chr6	52201754	52204587	-	2	0	0	1	0	0	0	0	0	0	0	0	0	0	0	0	0	0	0	0	0	0	0	0	0	0	0	0	0	0
Hoxa6_chr6_52206288_52208722_(-)	Hoxa6	chr6	52206288	52208722	-	0	1	0	0	0	0	0	0	0	0	0	0	0	0	0	0	0	0	0	0	0	0	0	0	0	0	0	0	0	0
Hoxa7_chr6_52214491_52221854_(-)	Hoxa7	chr6	52214491	52221854	-	0	2	0	0	1	0	0	2	0	0	0	0	0	0	0	0	0	0	0	0	0	0	0	0	0	0	0	0	0	0
Hoxa9_chr6_52223100_52231089_(-)	Hoxa9	chr6	52223100	52231089	-	4	5	0	0	2	0	0	0	1	0	0	0	0	0	0	0	0	0	0	0	0	0	0	0	0	0	0	0	0	0
Mir196b_chr6_52230081_52230165_(-)	Mir196b	chr6	52230081	52230165	-	0	0	0	0	0	0	0	0	0	0	0	0	0	0	0	0	0	0	0	0	0	0	0	0	0	0	0	0	0	0
Hoxa10_chr6_52231197_52240854_(-)	Hoxa10	chr6	52231197	52240854	-	5	0	1	0	3	0	3	0	0	2	0	0	0	0	0	0	0	0	1	0	0	0	0	0	0	0	0	0	0	0
Hoxa11_chr6_52242106_52245810_(-)	Hoxa11	chr6	52242106	52245810	-	1	0	0	0	0	0	1	0	0	0	0	0	0	0	0	0	0	0	0	0	0	0	0	0	1	0	0	0	0	0
Hoxa11os_chr6_52244393_52249799_(+)	Hoxa11os	chr6	52244393	52249799	+	0	0	0	0	0	0	0	0	0	0	0	0	0	0	0	0	0	0	1	0	0	0	0	0	0	0	0	0	1	0
Gm28032_chr6_52246009_52246104_(+)	Gm28032	chr6	52246009	52246104	+	0	0	0	0	0	0	0	0	0	0	0	0	0	0	0	0	0	0	0	0	0	0	0	0	0	0	0	0	0	0
Gm27492_chr6_52246399_52246585_(+)	Gm27492	chr6	52246399	52246585	+	0	0	0	0	0	0	0	0	0	0	0	0	0	0	0	0	0	0	0	0	0	0	0	0	0	0	0	0	0	0
Gm27695_chr6_52246718_52246808_(+)	Gm27695	chr6	52246718	52246808	+	0	0	0	0	0	0	0	0	0	0	0	0	0	0	0	0	0	0	0	0	0	0	0	0	0	0	0	0	0	0
Gm27817_chr6_52247421_52247653_(+)	Gm27817	chr6	52247421	52247653	+	0	0	0	0	0	0	0	0	0	0	0	0	0	0	0	0	0	0	0	0	0	0	0	0	0	0	0	0	0	0
Gm27454_chr6_52248332_52248535_(+)	Gm27454	chr6	52248332	52248535	+	0	0	0	0	0	0	0	0	0	0	0	0	0	0	0	0	0	0	0	0	0	0	0	0	0	0	0	0	0	0
Gm27543_chr6_52249299_52249475_(+)	Gm27543	chr6	52249299	52249475	+	0	0	0	0	0	0	0	0	0	0	0	0	0	0	0	0	0	0	0	0	0	0	0	0	0	0	0	0	0	0
9530018H14Rik_chr6_52256218_52257460_(-)	9530018H14Rik	chr6	52256218	52257460	-	0	0	0	0	0	0	0	0	0	0	0	0	0	0	0	0	0	0	0	0	0	0	0	0	0	0	0	0	0	0
Hoxa13_chr6_52257694_52260880_(-)	Hoxa13	chr6	52257694	52260880	-	0	0	0	0	0	0	0	0	0	0	0	0	0	0	0	0	0	0	0	0	0	0	1	0	0	0	0	0	0	0
Gm27280_chr6_52261154_52261212_(+)	Gm27280	chr6	52261154	52261212	+	0	0	0	0	0	0	0	0	0	0	0	0	0	0	0	0	0	0	0	0	0	0	0	0	0	0	0	0	0	0
Gm27985_chr6_52262592_52262969_(+)	Gm27985	chr6	52262592	52262969	+	0	0	0	0	0	0	0	0	0	0	0	0	0	0	0	0	0	0	0	0	0	0	0	0	0	0	0	0	0	0
Hottip_chr6_52262775_52267603_(+)	Hottip	chr6	52262775	52267603	+	0	0	0	0	0	0	0	0	0	0	0	0	0	0	0	0	0	0	0	0	0	0	0	0	0	0	0	0	0	0
Gm27383_chr6_52263058_52263418_(+)	Gm27383	chr6	52263058	52263418	+	0	0	0	0	0	0	0	0	0	0	0	0	0	0	0	0	0	0	0	0	0	0	0	0	0	0	0	0	0	0
Gm27866_chr6_52266584_52266754_(+)	Gm27866	chr6	52266584	52266754	+	0	0	0	0	0	0	0	0	0	0	0	0	0	0	0	0	0	0	0	0	0	0	0	0	0	0	0	0	0	0
Gm44294_chr6_52297124_52297851_(+)	Gm44294	chr6	52297124	52297851	+	0	0	0	0	0	0	0	0	0	0	0	0	0	0	0	0	0	0	0	0	0	0	0	0	0	0	0	0	0	0
Evx1os_chr6_52308389_52314832_(-)	Evx1os	chr6	52308389	52314832	-	3	0	2	3	3	2	6	3	0	0	0	0	0	0	0	0	0	0	1	1	0	0	0	1	1	0	1	0	1	0
Evx1_chr6_52313498_52318378_(+)	Evx1	chr6	52313498	52318378	+	7	1	5	1	4	0	5	0	0	0	1	0	0	1	0	0	0	0	1	2	1	0	0	0	0	0	0	3	1	0
Gm8129_chr6_52346730_52346942_(-)	Gm8129	chr6	52346730	52346942	-	0	0	0	0	0	1	0	0	0	0	0	1	0	0	0	0	0	0	0	0	0	1	0	0	0	1	0	0	0	1
Gm15054_chr6_52357544_52357824_(-)	Gm15054	chr6	52357544	52357824	-	0	0	0	0	0	0	0	0	0	0	0	0	0	0	0	1	0	0	0	0	0	0	0	0	0	0	0	1	0	0
1700094M24Rik_chr6_52492451_52500086_(+)	1700094M24Rik	chr6	52492451	52500086	+	0	0	0	0	0	0	0	0	0	0	0	0	0	0	0	0	0	0	0	0	0	0	0	0	0	0	0	0	0	0
Gm44028_chr6_52509889_52514036_(+)	Gm44028	chr6	52509889	52514036	+	0	0	0	0	0	0	0	0	0	0	0	0	0	0	0	0	0	0	0	0	0	0	0	0	0	0	0	1	0	0
Hibadh_chr6_52546228_52640389_(-)	Hibadh	chr6	52546228	52640389	-	383	127	454	149	369	124	488	119	142	62	219	102	136	76	232	140	180	104	213	137	232	149	144	115	244	139	197	99	213	152
Gm44445_chr6_52560552_52563234_(+)	Gm44445	chr6	52560552	52563234	+	0	0	0	0	0	0	0	0	0	0	0	0	0	0	0	0	0	0	0	0	0	0	0	0	0	0	0	0	0	0
Gm44434_chr6_52599501_52603245_(-)	Gm44434	chr6	52599501	52603245	-	8	2	6	3	10	2	12	3	2	1	5	6	1	3	3	0	5	5	6	2	5	2	4	10	10	5	6	8	6	3
Gm24355_chr6_52639234_52639355_(-)	Gm24355	chr6	52639234	52639355	-	0	0	0	0	0	0	0	0	0	0	0	0	0	0	0	0	0	0	1	0	0	0	0	0	1	0	0	0	1	0
Gm43966_chr6_52713344_52713955_(-)	Gm43966	chr6	52713344	52713955	-	0	0	0	0	1	0	0	0	0	0	0	0	0	0	0	1	0	0	0	0	0	0	0	0	0	0	0	0	0	0
Tax1bp1_chr6_52713729_52766780_(+)	Tax1bp1	chr6	52713729	52766780	+	394	135	483	144	398	128	454	114	102	45	158	80	120	61	159	110	99	55	328	131	285	139	230	114	280	156	296	116	329	134
Gm43967_chr6_52722630_52722930_(-)	Gm43967	chr6	52722630	52722930	-	0	0	0	0	0	0	0	0	0	0	0	0	0	0	0	0	0	0	0	0	0	0	0	0	0	0	0	0	0	0
Jazf1_chr6_52768797_53068631_(-)	Jazf1	chr6	52768797	53068631	-	142	30	160	30	122	31	93	25	57	16	70	38	49	20	46	28	29	19	58	28	38	20	58	46	52	34	50	19	40	31
Gm15572_chr6_52843109_52843701_(-)	Gm15572	chr6	52843109	52843701	-	0	0	0	0	0	0	0	0	0	0	0	0	0	0	0	0	0	0	0	0	0	0	0	0	0	0	0	0	0	0
Gm26215_chr6_53010394_53010532_(-)	Gm26215	chr6	53010394	53010532	-	0	0	0	0	0	0	0	0	0	0	0	0	0	0	0	0	0	0	0	0	0	0	0	0	0	0	0	0	0	0
Gm15573_chr6_53045884_53046423_(+)	Gm15573	chr6	53045884	53046423	+	0	0	0	0	0	0	0	0	0	0	0	0	0	0	0	0	0	0	0	0	0	0	1	0	0	0	0	0	0	0
Gm8143_chr6_53170550_53171735_(-)	Gm8143	chr6	53170550	53171735	-	0	0	0	0	0	0	0	0	0	0	0	0	0	0	0	0	0	0	0	0	0	0	0	0	0	0	0	0	0	0
Gm4872_chr6_53221164_53224975_(+)	Gm4872	chr6	53221164	53224975	+	0	0	0	0	0	0	0	0	0	0	0	0	0	0	1	0	0	0	0	0	0	0	0	0	0	0	0	0	0	0
Creb5_chr6_53287270_53700376_(+)	Creb5	chr6	53287270	53700376	+	155	41	65	24	77	27	44	14	48	24	60	25	46	23	15	21	34	17	8	5	18	16	21	16	24	26	15	6	22	20
Gm25818_chr6_53433974_53434137_(+)	Gm25818	chr6	53433974	53434137	+	0	0	0	0	0	0	0	0	0	0	0	0	0	0	0	0	0	0	0	0	0	0	0	0	0	0	0	0	0	0
Gm44080_chr6_53667770_53669983_(+)	Gm44080	chr6	53667770	53669983	+	0	0	0	0	0	0	0	0	0	0	1	0	0	0	0	0	0	0	0	0	0	0	0	0	0	0	0	0	0	0
Gm5306_chr6_53777384_53778140_(+)	Gm5306	chr6	53777384	53778140	+	0	0	0	0	0	0	0	0	0	0	0	0	0	0	0	0	0	0	0	0	0	0	0	0	0	0	0	0	0	0
Tril_chr6_53815468_53820830_(-)	Tril	chr6	53815468	53820830	-	0	1	0	2	1	1	1	2	0	0	0	0	0	0	0	0	0	0	2	1	2	0	0	2	0	0	0	2	0	0
Gm16499_chr6_53818743_53868183_(+)	Gm16499	chr6	53818743	53868183	+	1	0	1	0	0	0	1	1	0	0	0	0	0	0	0	1	0	0	0	0	0	0	1	0	0	0	0	1	6	0
Gm16499_chr6_53819974_53822150_(+)	Gm16499	chr6	53819974	53822150	+	0	0	0	0	0	0	0	0	0	0	0	0	0	0	0	0	0	0	0	0	0	0	0	0	0	0	1	0	0	0
Gm22910_chr6_53872017_53872148_(-)	Gm22910	chr6	53872017	53872148	-	0	0	0	0	0	0	0	0	0	0	0	0	0	0	0	0	0	0	0	0	0	0	0	0	0	0	0	0	0	0
Cpvl_chr6_53873279_53978671_(-)	Cpvl	chr6	53873279	53978671	-	11	4	5	5	9	3	10	2	7	2	5	2	8	0	5	4	5	1	8	3	4	5	2	2	6	3	3	1	10	1
4921529L05Rik_chr6_53978691_54018030_(+)	4921529L05Rik	chr6	53978691	54018030	+	0	0	2	0	0	0	1	0	0	0	0	0	0	0	0	0	0	0	0	0	0	0	0	0	0	0	0	0	0	0
Chn2_chr6_54039554_54301810_(+)	Chn2	chr6	54039554	54301810	+	192	92	148	77	137	83	163	71	58	28	91	51	77	51	88	78	43	55	66	44	84	53	59	66	95	62	50	53	56	62
9530036M11Rik_chr6_54146887_54150937_(-)	9530036M11Rik	chr6	54146887	54150937	-	0	0	0	0	0	0	0	0	0	0	0	0	0	0	0	0	0	0	0	0	0	0	0	0	0	0	0	0	0	0
Gm15526_chr6_54177480_54177683_(-)	Gm15526	chr6	54177480	54177683	-	0	0	1	0	0	0	0	0	0	0	0	1	0	0	0	0	0	0	0	0	0	0	0	0	0	0	0	0	0	0
Gm15527_chr6_54245742_54279076_(-)	Gm15527	chr6	54245742	54279076	-	1	0	1	0	1	0	2	0	0	0	0	0	0	0	0	0	0	0	0	0	1	0	3	0	0	0	3	0	2	0
9130019P16Rik_chr6_54269681_54430221_(-)	9130019P16Rik	chr6	54269681	54430221	-	4	0	5	0	4	0	3	1	0	1	0	0	0	1	0	0	0	0	7	0	5	0	3	1	6	0	7	1	1	0
Prr15_chr6_54325835_54330201_(+)	Prr15	chr6	54325835	54330201	+	2	0	0	0	0	0	0	0	1	0	0	0	4	0	0	0	0	0	0	0	1	1	1	0	1	0	0	0	3	0
Wipf3_chr6_54429603_54503768_(+)	Wipf3	chr6	54429603	54503768	+	32	12	32	11	44	6	14	6	11	4	11	8	14	4	9	8	9	0	10	5	9	10	7	12	11	8	5	7	14	5
Gm44026_chr6_54463685_54473170_(-)	Gm44026	chr6	54463685	54473170	-	2	0	1	0	1	0	1	0	1	0	0	0	1	0	0	0	0	0	0	0	0	0	0	0	0	0	0	0	0	0
Scrn1_chr6_54501173_54566489_(-)	Scrn1	chr6	54501173	54566489	-	103	4	193	4	145	3	146	1	29	3	28	3	17	2	29	3	28	5	18	1	41	1	16	3	40	1	19	1	27	2
Fkbp14_chr6_54577604_54597308_(-)	Fkbp14	chr6	54577604	54597308	-	31	9	42	9	29	7	30	7	5	4	6	3	4	3	8	4	5	7	21	8	18	11	10	14	20	4	11	12	17	15
Plekha8_chr6_54595111_54645839_(+)	Plekha8	chr6	54595111	54645839	+	283	143	349	163	257	152	305	124	61	47	75	82	105	59	93	111	67	63	106	120	109	108	86	91	154	131	128	97	128	112
Gm28402_chr6_54680930_54681917_(-)	Gm28402	chr6	54680930	54681917	-	0	0	0	0	0	0	0	0	0	0	0	0	0	0	0	0	0	0	0	0	0	0	0	0	0	0	0	0	0	0
Mturn_chr6_54681624_54703851_(+)	Mturn	chr6	54681624	54703851	+	22	12	17	16	19	9	18	12	7	23	7	13	4	15	19	35	8	12	9	48	17	41	5	20	17	39	7	24	22	40
Gm44008_chr6_54693646_54694057_(+)	Gm44008	chr6	54693646	54694057	+	1	0	0	0	0	0	0	0	0	0	1	0	0	0	3	0	0	0	0	1	0	2	0	0	1	0	0	1	0	0
Znrf2_chr6_54816916_54893500_(+)	Znrf2	chr6	54816916	54893500	+	504	319	552	368	548	344	566	362	137	128	204	220	195	220	242	291	178	220	414	456	390	440	237	342	320	393	340	430	370	437
Gm44185_chr6_54902422_54905728_(+)	Gm44185	chr6	54902422	54905728	+	4	1	4	3	3	4	3	4	2	0	2	2	1	1	3	4	5	4	2	3	1	1	0	6	2	4	3	1	2	3
Nod1_chr6_54923949_54972612_(-)	Nod1	chr6	54923949	54972612	-	48	26	90	22	89	37	70	32	15	9	22	12	11	19	38	31	16	18	90	76	58	48	41	53	66	65	63	59	61	61
Gm24230_chr6_54974651_54974779_(+)	Gm24230	chr6	54974651	54974779	+	0	0	0	0	0	0	0	0	0	0	0	0	0	0	0	0	0	0	0	0	0	0	0	0	0	0	0	0	0	0
Ggct_chr6_54982580_54992950_(-)	Ggct	chr6	54982580	54992950	-	52	35	62	61	44	40	52	45	10	12	5	9	11	5	9	19	3	16	21	38	28	39	19	40	24	40	22	40	23	51
Gars_chr6_55038007_55079500_(+)	Gars	chr6	55038007	55079500	+	2107	496	1719	428	1537	395	1711	454	548	221	685	238	646	210	818	302	687	270	1338	474	1541	504	1218	498	1331	555	1168	442	1561	536
Crhr2_chr6_55090049_55133016_(-)	Crhr2	chr6	55090049	55133016	-	1	0	3	3	8	0	1	0	0	0	4	0	1	1	2	0	1	0	4	0	6	1	4	3	2	0	0	0	2	2
Gm34358_chr6_55154459_55167210_(+)	Gm34358	chr6	55154459	55167210	+	0	0	0	0	0	0	0	0	0	0	0	0	0	1	0	0	0	0	0	0	0	0	0	0	0	0	0	0	0	0
Inmt_chr6_55170626_55175043_(-)	Inmt	chr6	55170626	55175043	-	0	0	0	0	0	0	0	0	0	0	0	0	0	0	0	0	0	0	0	0	0	0	0	0	0	0	0	0	0	0
Mindy4_chr6_55203383_55320222_(+)	Mindy4	chr6	55203383	55320222	+	115	21	107	27	122	26	75	21	27	9	28	8	29	15	40	19	40	13	62	29	49	27	55	29	57	30	51	28	46	29
Gm44073_chr6_55296262_55307886_(-)	Gm44073	chr6	55296262	55307886	-	0	1	0	0	0	0	0	0	0	1	0	0	0	0	1	0	0	0	0	0	0	0	0	0	0	0	0	0	0	0
Gm25458_chr6_55308805_55308905_(-)	Gm25458	chr6	55308805	55308905	-	0	0	0	0	0	0	0	0	0	0	0	0	0	0	0	0	0	0	0	0	0	0	0	0	0	0	0	0	0	0
Aqp1_chr6_55336432_55348555_(+)	Aqp1	chr6	55336432	55348555	+	0	1	0	0	0	0	0	0	0	0	0	0	0	2	1	0	1	0	0	1	0	0	1	0	0	0	0	0	0	0
Ghrhr_chr6_55376295_55388530_(+)	Ghrhr	chr6	55376295	55388530	+	0	0	0	0	0	0	0	0	0	0	0	0	0	0	0	0	0	0	0	1	1	0	0	0	0	0	0	0	0	0
6430584L05Rik_chr6_55396887_55412285_(+)	6430584L05Rik	chr6	55396887	55412285	+	0	0	0	0	0	0	0	0	0	0	0	0	0	0	0	0	0	0	0	0	0	0	0	0	0	0	0	0	0	0
Adcyap1r1_chr6_55451978_55501451_(+)	Adcyap1r1	chr6	55451978	55501451	+	20	11	19	9	18	12	26	9	4	4	14	5	5	5	8	3	11	5	12	8	8	7	14	13	14	5	7	4	6	9
Gm44352_chr6_55533506_55533615_(+)	Gm44352	chr6	55533506	55533615	+	0	0	0	0	0	0	0	0	0	0	0	0	0	0	0	0	0	0	0	0	0	0	0	0	0	0	0	0	0	0
Neurod6_chr6_55677822_55681263_(-)	Neurod6	chr6	55677822	55681263	-	1	0	0	0	0	0	0	0	0	0	0	0	0	0	0	0	0	0	0	0	0	0	0	0	0	0	0	0	0	0
Gm3279_chr6_55684571_55694574_(+)	Gm3279	chr6	55684571	55694574	+	0	0	0	0	0	0	0	0	0	0	0	0	0	0	0	0	0	0	0	0	0	0	0	0	0	0	0	0	0	0
Itprid1_chr6_55836895_55978735_(+)	Itprid1	chr6	55836895	55978735	+	0	0	6	3	4	0	1	1	0	0	3	2	0	0	0	2	0	0	0	0	1	0	1	0	1	0	1	1	1	2
Ppp1r17_chr6_56017497_56032689_(+)	Ppp1r17	chr6	56017497	56032689	+	0	0	0	0	0	0	0	0	0	0	0	0	0	0	0	0	0	0	0	0	0	0	0	0	0	0	0	0	0	0
Pde1c_chr6_56069804_56652487_(-)	Pde1c	chr6	56069804	56652487	-	68	9	79	11	101	9	71	12	28	7	54	14	33	13	55	14	32	14	31	11	54	17	36	16	63	17	44	11	41	19
Gm44413_chr6_56172928_56173031_(-)	Gm44413	chr6	56172928	56173031	-	0	0	0	0	0	0	0	0	0	0	0	0	0	0	0	0	0	0	0	0	0	0	0	0	0	0	0	0	0	0
Gm24709_chr6_56583715_56583846_(-)	Gm24709	chr6	56583715	56583846	-	0	0	0	0	0	0	0	0	0	0	0	0	0	0	0	0	0	0	0	0	0	0	0	0	0	0	0	0	0	0
Gm22493_chr6_56600818_56600949_(-)	Gm22493	chr6	56600818	56600949	-	0	0	0	0	0	0	0	0	0	0	0	0	0	0	0	0	0	0	0	0	0	0	0	0	0	0	0	0	0	0
Lsm5_chr6_56701063_56704710_(-)	Lsm5	chr6	56701063	56704710	-	29	2	31	0	26	2	29	0	6	0	18	0	14	0	7	0	10	1	20	0	39	0	16	2	27	0	41	1	27	1
Avl9_chr6_56714899_56761912_(+)	Avl9	chr6	56714899	56761912	+	280	59	304	66	302	62	236	41	70	32	115	42	94	35	130	39	76	20	221	76	225	64	181	61	199	82	180	56	230	76
Kbtbd2_chr6_56777524_56797813_(-)	Kbtbd2	chr6	56777524	56797813	-	211	50	255	48	206	60	160	39	76	14	104	27	78	28	82	18	68	13	129	37	96	36	136	43	122	60	116	37	87	47
Gm10209_chr6_56797591_56799197_(+)	Gm10209	chr6	56797591	56799197	+	1	1	7	1	1	2	3	1	2	1	0	2	0	0	1	1	0	0	1	4	0	1	1	3	1	2	2	0	2	2
Fkbp9_chr6_56832059_56879358_(+)	Fkbp9	chr6	56832059	56879358	+	960	196	1338	294	1288	248	865	183	367	136	527	169	394	141	429	159	353	156	582	208	508	232	450	222	593	226	453	183	510	223
Nt5c3_chr6_56882400_56923932_(-)	Nt5c3	chr6	56882400	56923932	-	208	40	207	48	192	43	203	41	52	30	90	28	69	8	77	35	51	20	143	42	140	47	108	48	118	38	106	36	127	46
Gm3793_chr6_56905911_56906582_(-)	Gm3793	chr6	56905911	56906582	-	0	0	0	0	0	0	0	0	0	0	1	0	0	0	0	0	1	0	1	0	0	0	0	0	0	0	0	0	1	0
Vmn1r4_chr6_56924015_56958100_(+)	Vmn1r4	chr6	56924015	56958100	+	5	1	1	1	2	0	1	0	1	0	1	0	2	0	0	0	0	0	2	1	0	0	2	0	1	0	0	1	0	0
Gm44049_chr6_56941841_56944824_(-)	Gm44049	chr6	56941841	56944824	-	0	0	0	0	0	0	0	0	0	0	0	0	0	0	0	0	0	0	0	0	0	0	0	0	0	0	0	0	0	0
Vmn1r5_chr6_56970273_56988390_(+)	Vmn1r5	chr6	56970273	56988390	+	0	0	0	0	0	0	0	0	0	0	0	0	0	0	0	0	0	0	0	0	0	0	0	0	0	0	0	0	0	0
Vmn1r6_chr6_56997243_57009825_(+)	Vmn1r6	chr6	56997243	57009825	+	0	0	0	0	0	0	0	0	0	0	0	0	0	0	0	0	0	0	0	0	0	0	0	0	0	0	0	0	0	0
Vmn1r7_chr6_57024106_57025324_(-)	Vmn1r7	chr6	57024106	57025324	-	0	0	0	0	0	0	0	0	0	0	0	0	0	0	0	0	0	0	0	0	0	0	0	0	0	0	0	0	0	0
Vmn1r8_chr6_57032284_57037391_(+)	Vmn1r8	chr6	57032284	57037391	+	0	0	0	0	0	0	0	0	0	0	0	0	0	0	0	0	0	0	0	0	0	0	0	0	0	0	0	0	0	0
Vmn1r9_chr6_57066787_57074906_(+)	Vmn1r9	chr6	57066787	57074906	+	1	0	0	0	0	0	0	0	0	0	0	0	0	0	0	0	0	0	0	0	0	0	0	0	0	0	0	0	0	0
Vmn1r10_chr6_57109454_57115035_(+)	Vmn1r10	chr6	57109454	57115035	+	0	0	0	0	0	0	0	0	0	0	0	0	0	0	0	0	0	0	0	0	0	0	0	0	0	0	0	0	0	0
Vmn1r11_chr6_57133455_57139617_(+)	Vmn1r11	chr6	57133455	57139617	+	0	0	0	0	0	0	0	0	0	0	0	0	0	0	0	0	0	0	0	0	0	0	0	0	0	0	0	0	0	0
Vmn1r12_chr6_57156919_57165329_(+)	Vmn1r12	chr6	57156919	57165329	+	0	0	0	1	0	0	0	0	0	0	0	0	0	0	0	0	0	0	0	0	0	0	0	0	0	0	0	0	0	0
Vmn1r-ps8_chr6_57188507_57189344_(+)	Vmn1r-ps8	chr6	57188507	57189344	+	0	0	0	0	0	0	0	0	0	0	0	0	0	0	0	0	0	0	0	0	0	0	0	0	0	0	0	0	0	0
Vmn1r13_chr6_57203290_57214799_(+)	Vmn1r13	chr6	57203290	57214799	+	0	0	0	0	0	0	0	0	0	0	0	0	0	0	0	0	0	0	0	0	0	0	0	0	0	0	0	0	0	0
Vmn1r14_chr6_57231686_57240885_(+)	Vmn1r14	chr6	57231686	57240885	+	0	0	0	0	0	0	0	0	0	0	0	0	0	0	0	0	0	0	0	0	0	0	0	0	0	0	0	0	0	0
Vmn1r15_chr6_57257952_57259972_(+)	Vmn1r15	chr6	57257952	57259972	+	0	0	0	0	0	0	0	0	0	0	0	0	0	0	0	0	0	0	0	0	0	0	0	0	0	0	0	0	0	0
Vmn1r-ps9_chr6_57278028_57278656_(+)	Vmn1r-ps9	chr6	57278028	57278656	+	0	0	0	0	0	0	0	0	0	0	0	0	0	0	0	0	0	0	0	0	0	0	0	0	0	0	0	0	0	0
Vmn1r-ps10_chr6_57312939_57313827_(+)	Vmn1r-ps10	chr6	57312939	57313827	+	0	0	0	0	0	0	0	0	0	0	0	0	0	0	0	0	0	0	0	0	0	0	0	0	0	0	0	0	0	0
Vmn1r16_chr6_57318052_57329494_(-)	Vmn1r16	chr6	57318052	57329494	-	0	1	0	0	0	0	0	0	0	0	0	0	0	0	0	0	0	0	0	0	0	0	0	0	0	0	0	0	0	0
Vmn1r17_chr6_57359239_57363727_(-)	Vmn1r17	chr6	57359239	57363727	-	0	0	0	0	0	0	0	0	0	0	0	0	0	0	0	0	0	0	0	0	0	0	0	0	0	0	0	0	0	0
Vmn1r18_chr6_57376660_57395783_(-)	Vmn1r18	chr6	57376660	57395783	-	0	0	0	0	0	0	0	0	0	0	0	0	0	0	0	0	0	0	0	0	0	0	0	0	0	0	0	0	0	0
Vmn1r19_chr6_57403780_57406034_(+)	Vmn1r19	chr6	57403780	57406034	+	0	0	0	0	0	0	0	0	0	0	0	0	0	0	0	0	0	0	0	0	0	0	0	0	0	0	0	0	0	0
Vmn1r20_chr6_57428930_57435261_(+)	Vmn1r20	chr6	57428930	57435261	+	0	0	0	1	0	0	0	0	0	0	0	0	0	0	0	0	0	0	0	0	0	0	0	0	0	0	0	0	0	0
Vmn1r-ps11_chr6_57447356_57448208_(-)	Vmn1r-ps11	chr6	57447356	57448208	-	0	0	0	0	0	0	0	0	0	0	0	0	0	0	0	0	0	0	0	0	0	0	0	0	0	0	0	0	0	0
4930533I22Rik_chr6_57476697_57497671_(+)	4930533I22Rik	chr6	57476697	57497671	+	0	0	0	0	1	0	0	1	0	0	0	0	0	0	0	0	0	1	0	2	0	0	1	0	1	0	0	0	0	0
Gm45193_chr6_57485121_57626030_(+)	Gm45193	chr6	57485121	57626030	+	14	4	14	6	18	6	5	1	4	3	10	4	4	4	6	10	7	5	10	3	12	15	6	13	17	10	9	3	8	6
Ppm1k_chr6_57506502_57535468_(-)	Ppm1k	chr6	57506502	57535468	-	49	15	60	11	46	4	66	15	11	4	27	10	13	11	34	15	26	7	64	26	55	34	22	19	63	30	47	30	61	30
Gm27896_chr6_57565793_57566109_(+)	Gm27896	chr6	57565793	57566109	+	0	0	0	0	0	0	0	0	0	0	0	0	0	0	0	0	0	0	0	0	0	0	0	0	0	0	0	0	0	0
Herc6_chr6_57581000_57664632_(+)	Herc6	chr6	57581000	57664632	+	2	2	2	2	3	0	1	0	3	0	2	0	0	1	3	1	1	1	1	3	5	2	3	1	3	6	1	5	6	2
Gm19244_chr6_57617025_57617277_(-)	Gm19244	chr6	57617025	57617277	-	0	0	0	0	0	0	0	0	0	0	0	0	0	0	0	0	0	0	0	0	0	0	0	0	0	0	0	0	0	0
Gm37397_chr6_57684739_57687580_(-)	Gm37397	chr6	57684739	57687580	-	8	1	4	1	3	1	3	0	1	0	1	0	0	0	0	0	1	0	1	0	1	0	2	3	1	0	2	0	2	2
Pyurf_chr6_57686576_57692078_(-)	Pyurf	chr6	57686576	57692078	-	40	2	66	3	38	1	43	0	4	0	7	2	5	3	5	3	10	1	19	7	27	3	16	2	22	3	16	4	20	0
Gm26712_chr6_57689433_57689649_(-)	Gm26712	chr6	57689433	57689649	-	0	0	0	0	0	0	0	0	0	0	0	0	0	0	0	0	0	0	0	0	0	0	0	0	0	0	0	0	0	0
Lancl2_chr6_57702540_57739439_(+)	Lancl2	chr6	57702540	57739439	+	184	61	189	60	167	52	173	61	26	16	46	34	29	15	34	14	29	12	71	33	80	32	51	40	81	47	60	38	72	47
Vopp1_chr6_57727807_57825159_(-)	Vopp1	chr6	57727807	57825159	-	122	17	90	18	93	17	60	16	23	10	33	10	11	10	19	11	20	15	23	5	16	5	27	16	35	16	16	6	28	14
Vmn1r21_chr6_57842830_57850343_(-)	Vmn1r21	chr6	57842830	57850343	-	0	0	0	0	0	0	0	0	1	0	0	0	0	0	0	0	0	0	0	0	0	0	0	0	0	0	0	0	0	0
Gm44114_chr6_57845586_57848312_(+)	Gm44114	chr6	57845586	57848312	+	0	0	2	0	0	0	0	0	0	0	0	0	0	0	0	0	0	0	0	0	0	0	0	0	0	0	0	0	0	0
Gm25726_chr6_57859820_57859948_(-)	Gm25726	chr6	57859820	57859948	-	0	0	0	0	0	0	0	0	0	0	0	0	0	0	0	0	0	0	0	0	0	0	0	0	0	0	0	0	0	0
Vmn1r-ps12_chr6_57872415_57872916_(-)	Vmn1r-ps12	chr6	57872415	57872916	-	0	0	0	0	0	0	0	0	0	0	0	0	0	0	0	0	0	0	0	0	0	0	0	0	0	0	0	0	0	0
Vmn1r22_chr6_57898126_57908028_(-)	Vmn1r22	chr6	57898126	57908028	-	0	0	0	0	0	0	0	0	0	0	0	0	0	0	0	0	0	0	0	0	0	0	0	0	0	0	0	0	0	0
Vmn1r23_chr6_57925842_57926838_(-)	Vmn1r23	chr6	57925842	57926838	-	0	0	0	0	0	0	0	0	0	0	0	0	0	0	0	0	0	0	0	0	0	0	0	0	0	0	0	0	0	0
Gm20660_chr6_57949683_57949971_(-)	Gm20660	chr6	57949683	57949971	-	0	0	0	0	0	0	0	0	0	0	0	0	0	0	0	0	0	0	0	0	0	0	0	0	0	0	0	0	0	0
Vmn1r24_chr6_57954707_57961503_(-)	Vmn1r24	chr6	57954707	57961503	-	0	0	0	0	0	0	0	0	0	0	0	0	0	0	0	0	0	0	0	0	0	0	0	0	0	0	0	0	0	0
Vmn1r25_chr6_57978299_57980810_(-)	Vmn1r25	chr6	57978299	57980810	-	0	0	0	0	0	0	0	0	0	0	0	0	0	0	0	0	0	0	0	0	0	0	0	0	0	0	0	0	0	0
Vmn1r-ps13_chr6_57993448_57993581_(-)	Vmn1r-ps13	chr6	57993448	57993581	-	0	0	0	0	0	0	0	0	0	0	0	0	0	0	0	0	0	0	0	0	0	0	0	0	0	0	0	0	0	0
Vmn1r26_chr6_58004934_58015159_(-)	Vmn1r26	chr6	58004934	58015159	-	0	0	0	0	0	0	0	0	0	0	0	0	0	0	0	0	0	0	0	0	0	0	0	0	0	0	0	0	0	0
Rps15-ps2_chr6_58017506_58017943_(+)	Rps15-ps2	chr6	58017506	58017943	+	0	0	0	0	0	0	0	0	0	0	0	0	0	0	0	0	0	0	0	0	0	0	0	0	0	0	0	0	0	0
Vmn1r-ps14_chr6_58046448_58049899_(-)	Vmn1r-ps14	chr6	58046448	58049899	-	0	0	0	0	0	0	0	0	0	0	0	0	0	0	0	0	0	0	0	0	0	0	0	0	0	0	0	0	0	0
Vmn1r-ps15_chr6_58073596_58079129_(-)	Vmn1r-ps15	chr6	58073596	58079129	-	0	0	0	0	0	0	0	0	0	0	0	0	0	0	0	0	0	0	0	0	0	0	0	0	0	0	0	0	0	0
Gm6695_chr6_58091076_58092247_(+)	Gm6695	chr6	58091076	58092247	+	0	0	0	0	0	0	0	0	0	0	0	0	0	0	0	0	0	0	0	0	0	0	0	0	0	0	0	0	0	0
Vmn1r-ps16_chr6_58108063_58108167_(-)	Vmn1r-ps16	chr6	58108063	58108167	-	0	0	0	0	0	0	0	0	0	0	0	0	0	0	0	0	0	0	0	0	0	0	0	0	0	0	0	0	0	0
Vmn1r-ps17_chr6_58115737_58116630_(-)	Vmn1r-ps17	chr6	58115737	58116630	-	0	0	0	0	0	0	0	0	0	0	0	0	0	0	0	0	0	0	0	0	0	0	0	0	0	0	0	0	0	0
Gm20718_chr6_58135885_58136143_(+)	Gm20718	chr6	58135885	58136143	+	0	0	0	0	0	0	0	0	0	0	0	0	0	0	0	0	0	0	0	0	0	0	0	0	0	0	0	0	0	0
Gm43994_chr6_58192321_58194765_(+)	Gm43994	chr6	58192321	58194765	+	0	0	1	0	0	0	0	0	0	0	0	0	0	0	0	0	0	0	0	0	0	0	0	0	0	0	0	0	0	0
Vmn1r-ps18_chr6_58205685_58206925_(+)	Vmn1r-ps18	chr6	58205685	58206925	+	0	0	0	0	0	0	0	0	0	0	0	0	0	0	0	0	0	0	0	0	0	0	0	0	0	0	0	0	0	0
Vmn1r27_chr6_58213091_58218821_(-)	Vmn1r27	chr6	58213091	58218821	-	0	0	0	0	0	0	0	0	0	0	0	0	0	0	0	0	0	0	0	0	0	0	0	0	0	0	0	0	0	0
Vmn1r-ps19_chr6_58256623_58257548_(-)	Vmn1r-ps19	chr6	58256623	58257548	-	0	0	0	0	0	0	0	0	0	0	0	0	0	0	0	0	0	0	0	0	0	0	0	0	0	0	0	0	0	0
Vmn1r28_chr6_58262037_58275639_(+)	Vmn1r28	chr6	58262037	58275639	+	0	0	0	0	0	0	0	0	0	0	0	0	0	0	0	0	0	0	0	0	0	0	0	0	0	0	0	0	0	0
Vmn1r29_chr6_58301549_58311685_(+)	Vmn1r29	chr6	58301549	58311685	+	0	1	0	1	2	0	2	0	1	0	0	0	0	0	0	0	0	0	0	0	0	0	0	0	0	0	0	0	1	0
Gm20674_chr6_58394054_58394422_(+)	Gm20674	chr6	58394054	58394422	+	0	0	0	0	0	0	0	0	0	0	0	0	0	0	0	0	0	0	0	0	0	0	0	0	0	0	0	0	0	0
Vmn1r-ps20_chr6_58406413_58407327_(-)	Vmn1r-ps20	chr6	58406413	58407327	-	0	0	0	0	0	0	0	0	0	0	0	0	0	0	0	0	0	0	0	0	0	0	0	0	0	0	0	0	0	0
Vmn1r30_chr6_58434159_58443385_(-)	Vmn1r30	chr6	58434159	58443385	-	0	0	0	0	0	0	0	2	0	0	0	1	0	0	0	0	0	0	0	0	0	1	0	0	0	0	0	0	0	0
Gm44016_chr6_58438695_58438858_(-)	Gm44016	chr6	58438695	58438858	-	0	0	0	0	0	0	0	0	0	0	0	0	0	0	0	0	0	0	0	0	0	0	0	0	0	0	0	0	0	0
Vmn1r-ps21_chr6_58455069_58455993_(-)	Vmn1r-ps21	chr6	58455069	58455993	-	0	0	0	0	0	0	0	0	0	0	0	0	0	0	0	0	0	0	0	0	0	0	0	0	0	0	0	0	0	0
Gm35077_chr6_58457868_58521810_(-)	Gm35077	chr6	58457868	58521810	-	1	1	1	1	1	0	3	3	1	5	1	2	1	3	1	1	2	1	0	0	2	0	0	1	0	2	1	0	1	3
Gm20673_chr6_58461107_58461536_(+)	Gm20673	chr6	58461107	58461536	+	0	0	0	0	0	0	0	0	0	0	0	0	0	0	0	0	0	0	0	0	0	0	0	0	0	0	1	0	0	0
Vmn1r31_chr6_58470941_58475330_(-)	Vmn1r31	chr6	58470941	58475330	-	0	0	0	0	0	0	0	0	0	0	0	0	0	0	0	0	0	0	0	0	0	0	0	0	0	0	0	0	0	0
Vmn1r-ps22_chr6_58494348_58495247_(-)	Vmn1r-ps22	chr6	58494348	58495247	-	0	0	0	0	0	0	1	0	0	0	0	0	0	0	0	0	0	0	0	0	0	0	0	0	0	0	0	0	0	0
Vmn1r-ps23_chr6_58504443_58504737_(-)	Vmn1r-ps23	chr6	58504443	58504737	-	0	0	0	0	0	0	0	0	0	0	0	0	0	0	0	0	0	0	0	0	0	0	0	0	0	0	0	0	0	0
Gm20672_chr6_58512271_58512531_(+)	Gm20672	chr6	58512271	58512531	+	0	0	0	0	0	0	0	0	0	0	0	0	0	0	0	0	0	0	0	0	0	0	0	0	0	0	0	0	0	0
Abcg2_chr6_58584523_58695676_(+)	Abcg2	chr6	58584523	58695676	+	558	255	668	304	633	308	417	233	159	170	283	242	269	267	153	198	129	159	195	239	200	208	195	303	269	305	201	221	182	213
Gm43899_chr6_58781692_58781937_(-)	Gm43899	chr6	58781692	58781937	-	0	0	0	0	0	0	0	0	0	0	0	0	0	0	0	0	0	0	0	0	0	0	0	0	0	0	0	0	0	0
Herc3_chr6_58831465_58920398_(+)	Herc3	chr6	58831465	58920398	+	216	94	325	118	340	125	270	142	94	82	147	99	110	88	225	172	110	107	257	196	262	195	157	139	213	194	214	186	250	215
Nap1l5_chr6_58905233_58907076_(-)	Nap1l5	chr6	58905233	58907076	-	2	0	0	0	1	0	1	0	0	0	0	0	0	0	0	0	0	0	0	0	0	0	1	0	0	0	0	0	0	0
Fam13a_chr6_58932090_59024549_(-)	Fam13a	chr6	58932090	59024549	-	13	2	20	2	10	2	6	0	2	1	3	2	6	4	5	1	1	5	2	2	7	1	3	1	14	4	5	2	5	3
Gm45060_chr6_58964874_58972234_(+)	Gm45060	chr6	58964874	58972234	+	0	0	1	0	0	0	0	0	0	0	0	0	0	0	0	0	0	0	0	0	0	0	0	0	0	0	0	0	0	0
BB365896_chr6_58965655_59002083_(+)	BB365896	chr6	58965655	59002083	+	0	0	0	0	0	0	0	0	0	0	0	0	0	0	0	0	0	0	0	0	0	0	0	0	0	0	0	0	0	0
Gm45061_chr6_58973197_58975291_(+)	Gm45061	chr6	58973197	58975291	+	0	0	1	0	0	0	0	0	0	0	0	0	0	0	0	0	0	0	0	0	0	0	0	0	0	0	0	0	0	0
Gm19165_chr6_59036889_59039322_(+)	Gm19165	chr6	59036889	59039322	+	0	0	0	0	0	0	0	0	0	0	0	0	0	0	0	0	0	0	0	0	0	0	0	0	0	0	0	0	0	0
Gm22367_chr6_59099253_59099384_(+)	Gm22367	chr6	59099253	59099384	+	0	0	0	0	0	0	0	0	0	0	0	0	0	0	0	0	0	0	0	0	0	0	0	0	0	0	0	0	0	0
Gm43905_chr6_59193050_59193253_(-)	Gm43905	chr6	59193050	59193253	-	0	0	0	0	0	0	0	0	0	0	0	0	0	0	0	0	0	0	0	0	0	0	0	0	0	0	0	0	0	0
Tigd2_chr6_59208870_59212033_(+)	Tigd2	chr6	59208870	59212033	+	9	0	14	0	9	0	7	0	1	0	5	0	3	0	8	0	2	0	7	0	7	0	12	0	11	0	10	0	9	0
Gprin3_chr6_59347226_59426294_(-)	Gprin3	chr6	59347226	59426294	-	2	0	1	1	3	2	0	1	0	0	1	0	0	4	3	0	0	1	3	1	0	3	0	0	2	0	0	2	1	1
Gm22622_chr6_59705746_59705874_(-)	Gm22622	chr6	59705746	59705874	-	0	0	0	0	0	0	0	0	0	0	0	0	0	0	0	0	0	0	0	0	0	0	0	0	0	0	0	0	0	0
Gm18012_chr6_59942351_59943308_(+)	Gm18012	chr6	59942351	59943308	+	0	0	0	0	0	0	0	0	0	0	0	0	0	0	0	0	0	0	0	0	0	0	0	0	0	0	0	0	0	0
Gm5570_chr6_60031967_60150045_(+)	Gm5570	chr6	60031967	60150045	+	0	1	0	0	0	1	1	0	0	0	0	0	0	0	1	0	0	0	5	1	2	0	0	0	0	1	5	0	6	0
Gm22723_chr6_60071058_60071186_(-)	Gm22723	chr6	60071058	60071186	-	0	0	0	0	0	0	0	0	0	0	0	0	0	0	0	0	0	0	0	0	0	0	0	0	0	0	0	0	0	0
n-R5s162_chr6_60250792_60250910_(+)	n-R5s162	chr6	60250792	60250910	+	0	0	0	0	0	0	0	0	0	0	0	0	0	0	0	0	0	0	0	0	0	0	0	0	0	0	0	0	0	0
A530053G22Rik_chr6_60279043_60403707_(-)	A530053G22Rik	chr6	60279043	60403707	-	1	0	3	1	3	1	1	0	2	0	4	0	0	1	3	0	1	0	6	0	0	0	2	0	1	0	2	0	1	2
Gm44389_chr6_60461933_60462114_(-)	Gm44389	chr6	60461933	60462114	-	0	0	0	0	0	0	0	0	0	0	0	0	0	0	0	0	0	0	0	0	0	0	0	0	0	0	0	0	0	0
Gm44410_chr6_60489956_60490445_(+)	Gm44410	chr6	60489956	60490445	+	1	0	0	0	0	0	1	0	0	0	0	0	0	0	0	0	0	0	0	0	0	0	0	0	0	0	1	0	2	0
Gm35386_chr6_60586778_60591189_(+)	Gm35386	chr6	60586778	60591189	+	0	0	0	0	0	0	0	0	0	0	0	0	0	0	0	0	0	0	0	0	0	0	0	0	0	0	0	0	0	0
Snca_chr6_60731575_60829855_(-)	Snca	chr6	60731575	60829855	-	25	8	22	4	27	6	18	3	3	3	10	3	8	5	12	4	11	2	10	2	20	3	10	3	10	12	12	4	14	4
Mageb16-ps2_chr6_60769967_60771059_(-)	Mageb16-ps2	chr6	60769967	60771059	-	0	0	0	0	0	0	0	0	0	0	0	0	0	0	0	0	0	0	0	0	0	0	0	0	0	0	0	0	0	0
Gm43864_chr6_60791840_60795867_(-)	Gm43864	chr6	60791840	60795867	-	2	0	3	0	1	0	1	0	0	0	0	0	3	0	2	0	0	0	0	0	1	0	0	0	1	0	2	0	2	0
Gm43867_chr6_60882439_60882963_(-)	Gm43867	chr6	60882439	60882963	-	0	0	0	0	0	0	0	0	0	0	0	0	0	0	0	0	0	0	0	0	0	0	0	0	0	0	0	0	0	0
Mmrn1_chr6_60924976_60989378_(+)	Mmrn1	chr6	60924976	60989378	+	0	0	0	0	0	0	0	0	0	0	0	0	0	0	0	0	0	0	0	0	0	0	0	0	0	0	0	0	0	0
Gm18838_chr6_61016851_61017736_(-)	Gm18838	chr6	61016851	61017736	-	0	0	0	0	0	0	0	0	0	0	0	0	0	0	0	0	0	0	0	0	0	0	0	0	0	0	0	0	0	0
Gm43892_chr6_61044729_61044993_(-)	Gm43892	chr6	61044729	61044993	-	0	0	0	0	0	0	0	0	0	0	0	0	0	0	0	0	0	0	0	0	0	0	0	0	0	0	0	0	0	0
Gm43893_chr6_61064705_61069255_(-)	Gm43893	chr6	61064705	61069255	-	0	0	0	0	0	0	0	0	0	0	0	0	0	0	0	0	0	0	0	0	0	0	0	0	0	0	0	0	0	0
Gm43894_chr6_61147220_61147907_(-)	Gm43894	chr6	61147220	61147907	-	0	0	0	0	0	0	0	0	0	0	0	0	0	0	0	0	0	0	0	0	0	0	0	0	0	0	0	0	0	0
A730020E08Rik_chr6_61172293_61180810_(-)	A730020E08Rik	chr6	61172293	61180810	-	0	0	0	0	0	0	0	0	0	0	0	0	1	0	0	0	0	0	0	0	0	0	1	0	0	0	0	0	0	1
Ccser1_chr6_61180324_62382865_(+)	Ccser1	chr6	61180324	62382865	+	37	7	52	4	72	5	117	6	15	0	26	3	26	4	18	2	15	0	376	13	174	6	10	2	46	8	386	7	213	7
Gm43898_chr6_61400607_61401030_(+)	Gm43898	chr6	61400607	61401030	+	0	0	0	0	0	0	0	0	0	0	0	0	0	0	0	0	0	0	0	0	0	0	0	0	0	0	0	0	0	0
Gm43896_chr6_61975098_61977129_(+)	Gm43896	chr6	61975098	61977129	+	0	0	0	0	0	0	0	0	0	0	0	0	0	0	0	0	0	0	0	0	0	0	0	0	0	0	0	0	0	0
Gm43897_chr6_62293702_62294010_(-)	Gm43897	chr6	62293702	62294010	-	0	0	0	0	0	0	0	0	0	0	0	0	0	0	0	0	0	0	0	0	0	0	0	0	0	0	0	0	0	0
Gm43895_chr6_62307727_62309262_(-)	Gm43895	chr6	62307727	62309262	-	0	0	0	0	0	0	0	0	0	0	0	0	0	0	0	0	0	0	0	0	0	0	0	0	0	0	0	0	0	0
Gm19237_chr6_62582070_62583201_(+)	Gm19237	chr6	62582070	62583201	+	0	0	0	0	0	0	0	0	0	0	0	0	0	0	0	0	0	0	0	0	0	0	0	0	0	0	0	0	0	0
Gm44088_chr6_62630581_62630817_(+)	Gm44088	chr6	62630581	62630817	+	0	0	0	0	0	0	0	0	0	0	0	0	0	0	0	0	0	0	0	0	0	0	0	0	0	0	0	0	0	0
Gm44092_chr6_62756797_62757054_(+)	Gm44092	chr6	62756797	62757054	+	0	0	0	0	0	0	0	0	0	0	0	0	0	0	0	0	0	0	0	0	0	0	0	0	0	0	0	0	0	0
Gm18540_chr6_62820108_62820633_(+)	Gm18540	chr6	62820108	62820633	+	0	0	0	0	0	0	0	0	0	0	0	0	0	0	0	0	0	0	0	0	0	0	0	0	0	0	0	0	0	0
Gm5001_chr6_62929146_62929476_(+)	Gm5001	chr6	62929146	62929476	+	0	0	0	0	0	0	0	0	0	0	0	0	0	0	0	0	0	0	0	0	0	0	0	0	0	0	0	0	0	0
Gm19131_chr6_63044965_63048172_(-)	Gm19131	chr6	63044965	63048172	-	0	0	0	0	0	0	0	0	0	0	0	0	0	0	0	0	0	0	0	0	0	0	0	0	0	0	0	0	0	0
Nasp-ps1_chr6_63160275_63160965_(+)	Nasp-ps1	chr6	63160275	63160965	+	0	0	0	0	0	0	0	0	0	0	0	0	0	0	0	0	0	0	0	0	0	0	0	0	0	0	0	0	0	0
Gm22212_chr6_63200041_63200146_(-)	Gm22212	chr6	63200041	63200146	-	0	0	0	0	0	0	0	0	0	0	0	0	0	0	0	0	0	0	0	0	0	0	0	0	0	0	0	0	0	0
9330118I20Rik_chr6_63248494_63257625_(-)	9330118I20Rik	chr6	63248494	63257625	-	0	0	0	0	1	0	0	0	0	0	0	0	0	0	0	0	0	0	0	0	0	0	0	0	1	0	0	0	0	0
Grid2_chr6_63255876_64704323_(+)	Grid2	chr6	63255876	64704323	+	11	3	39	10	58	13	48	14	10	3	15	7	25	7	9	3	4	1	10	13	5	8	13	13	5	11	11	15	6	13
Gm44071_chr6_63324672_63328441_(-)	Gm44071	chr6	63324672	63328441	-	1	0	0	0	2	0	1	0	0	0	1	0	1	0	0	0	0	0	1	0	1	0	0	0	1	0	0	0	2	0
Gm44075_chr6_63783852_63784067_(-)	Gm44075	chr6	63783852	63784067	-	0	0	0	0	0	0	0	0	0	0	0	0	0	0	0	0	0	0	0	0	0	0	0	0	0	0	0	0	0	0
Gm44072_chr6_64040429_64041557_(-)	Gm44072	chr6	64040429	64041557	-	0	0	0	0	0	0	0	0	0	0	0	0	0	0	0	0	0	0	0	0	0	0	0	0	0	0	0	0	0	0
Gm20144_chr6_64092139_64092303_(+)	Gm20144	chr6	64092139	64092303	+	0	0	0	0	0	0	0	0	0	0	0	0	0	0	0	0	0	0	0	0	0	0	0	0	0	0	0	0	0	0
Gm25205_chr6_64413648_64413750_(+)	Gm25205	chr6	64413648	64413750	+	0	0	0	0	0	0	0	0	0	0	0	0	0	0	0	0	0	0	0	0	0	0	0	0	0	0	0	0	0	0
Atoh1_chr6_64729125_64731245_(+)	Atoh1	chr6	64729125	64731245	+	0	0	0	0	0	0	0	2	0	0	0	0	0	0	0	0	0	0	0	0	0	0	0	0	0	0	0	0	0	0
Gm18839_chr6_64878459_64879128_(-)	Gm18839	chr6	64878459	64879128	-	0	0	0	0	0	0	0	0	0	0	0	0	0	0	0	0	0	0	0	0	0	0	0	0	0	0	0	0	0	0
Gm44038_chr6_64978515_64979403_(+)	Gm44038	chr6	64978515	64979403	+	0	0	0	0	0	0	0	0	0	0	0	0	0	0	0	0	0	0	0	0	0	0	0	0	0	0	0	0	0	0
Gm15534_chr6_64990947_64991508_(+)	Gm15534	chr6	64990947	64991508	+	0	0	0	0	1	0	0	0	0	0	0	0	0	0	0	0	0	0	0	0	0	0	0	0	0	0	0	0	0	0
Smarcad1_chr6_65042583_65116061_(+)	Smarcad1	chr6	65042583	65116061	+	1385	415	1926	533	1516	476	1655	439	447	135	668	236	718	224	605	265	490	203	1642	585	1007	312	1355	445	1216	443	1314	392	1237	380
Hpgds_chr6_65117293_65144908_(-)	Hpgds	chr6	65117293	65144908	-	0	0	0	0	0	0	0	0	0	0	0	0	0	0	0	0	0	0	1	0	1	0	0	0	0	0	0	0	0	1
Gm17147_chr6_65128571_65129002_(+)	Gm17147	chr6	65128571	65129002	+	0	0	4	0	0	0	0	0	0	0	0	0	0	0	0	0	0	0	1	0	0	0	0	0	0	0	0	0	0	0
Gm44419_chr6_65150997_65151225_(+)	Gm44419	chr6	65150997	65151225	+	0	0	0	0	0	0	0	0	0	0	0	0	0	0	0	0	0	0	0	0	0	0	0	0	0	0	0	0	0	0
Gm3549_chr6_65169164_65169957_(+)	Gm3549	chr6	65169164	65169957	+	0	0	0	0	0	0	0	0	0	0	0	0	0	0	0	0	0	0	0	0	0	0	0	0	0	0	0	0	0	0
Gm44058_chr6_65213572_65214972_(-)	Gm44058	chr6	65213572	65214972	-	1	0	0	0	0	0	0	0	0	0	0	0	0	0	0	0	0	0	0	0	0	0	0	0	0	0	0	0	0	0
Gm44059_chr6_65232712_65233062_(-)	Gm44059	chr6	65232712	65233062	-	0	0	0	0	0	0	0	0	0	0	0	0	0	0	0	0	0	0	0	0	0	0	0	0	0	0	0	0	0	0
Gm20177_chr6_65247273_65247606_(+)	Gm20177	chr6	65247273	65247606	+	0	0	0	0	0	0	0	0	0	0	0	0	0	0	0	0	0	0	0	0	0	0	0	0	0	0	0	0	0	0
Gm44060_chr6_65271501_65271910_(-)	Gm44060	chr6	65271501	65271910	-	0	0	0	0	0	0	0	0	0	0	0	0	0	0	0	0	0	0	0	0	0	0	0	0	0	0	0	0	0	0
Gm44061_chr6_65272950_65274144_(-)	Gm44061	chr6	65272950	65274144	-	0	0	0	0	0	0	0	0	0	0	0	0	0	0	0	0	0	0	0	0	0	0	0	0	0	0	0	0	0	0
Gm8479_chr6_65328105_65329174_(+)	Gm8479	chr6	65328105	65329174	+	0	0	0	0	0	0	0	0	0	0	0	0	0	0	0	0	0	0	0	0	0	0	0	0	0	0	0	0	1	0
Qrfprl_chr6_65381105_65458150_(+)	Qrfprl	chr6	65381105	65458150	+	13	1	12	2	5	2	5	3	1	0	3	1	2	0	0	0	0	0	0	0	1	0	2	1	0	0	0	2	2	1
Gm18716_chr6_65416020_65417622_(+)	Gm18716	chr6	65416020	65417622	+	0	0	0	0	0	0	1	0	0	0	0	0	0	0	0	0	0	0	0	0	0	0	0	0	0	0	0	0	0	0
Gm18913_chr6_65432160_65433948_(+)	Gm18913	chr6	65432160	65433948	+	0	0	1	5	0	2	2	2	0	1	1	0	1	1	1	1	1	0	0	1	1	0	1	0	0	1	1	1	1	1
Tnip3_chr6_65525313_65634040_(+)	Tnip3	chr6	65525313	65634040	+	0	1	0	2	1	0	2	3	0	0	0	0	1	0	0	0	0	3	0	0	0	0	2	0	1	3	0	1	2	1
Ndnf_chr6_65671590_65712326_(+)	Ndnf	chr6	65671590	65712326	+	19	16	13	4	25	12	15	1	1	1	1	2	2	3	2	2	1	0	6	2	8	10	6	6	6	6	5	1	4	1
Gm15490_chr6_65757936_65758322_(+)	Gm15490	chr6	65757936	65758322	+	0	0	0	0	0	0	0	0	0	0	0	0	0	0	0	0	0	0	0	0	0	0	0	0	0	0	0	0	0	0
Gm16838_chr6_65768544_65779249_(-)	Gm16838	chr6	65768544	65779249	-	3	7	3	9	2	3	7	5	0	2	0	0	0	2	1	2	0	0	0	1	2	3	1	5	1	4	1	1	0	0
Prdm5_chr6_65778988_65937010_(+)	Prdm5	chr6	65778988	65937010	+	1284	363	1330	357	1223	364	1153	393	464	220	943	455	627	305	899	577	580	341	995	606	1207	655	833	555	988	587	881	534	1122	664
Gm23543_chr6_65864171_65864276_(-)	Gm23543	chr6	65864171	65864276	-	0	0	0	0	0	0	0	0	0	0	0	0	0	0	0	0	0	0	0	0	0	0	0	0	0	0	0	0	0	0
Gm20445_chr6_65882779_65883343_(+)	Gm20445	chr6	65882779	65883343	+	2	4	4	1	4	2	3	4	3	2	3	4	1	2	2	2	3	1	2	4	3	6	1	1	2	3	0	0	1	3
4930544G11Rik_chr6_65952609_65954014_(+)	4930544G11Rik	chr6	65952609	65954014	+	0	0	0	0	0	0	0	0	0	0	0	0	0	0	0	0	0	0	0	0	0	0	0	0	0	0	0	0	0	0
Gm44404_chr6_65981866_65983441_(-)	Gm44404	chr6	65981866	65983441	-	0	0	0	0	0	0	0	0	0	0	0	0	0	0	0	0	0	0	0	0	0	0	0	0	0	0	0	0	0	0
Gm23625_chr6_65989640_65989739_(-)	Gm23625	chr6	65989640	65989739	-	0	0	0	0	0	0	0	0	0	0	0	0	0	0	0	0	0	0	0	0	0	0	0	0	0	0	0	0	0	0
Gm5876_chr6_65995637_65996330_(+)	Gm5876	chr6	65995637	65996330	+	0	0	0	0	0	0	0	0	0	0	0	0	0	0	0	0	0	0	0	0	0	0	0	0	0	0	0	0	0	0
Gm44289_chr6_66254743_66258205_(+)	Gm44289	chr6	66254743	66258205	+	0	0	0	0	0	0	0	0	0	0	0	0	0	0	0	0	0	0	0	0	0	0	0	0	0	0	0	0	0	0
Gm31520_chr6_66264155_66284845_(+)	Gm31520	chr6	66264155	66284845	+	0	0	1	2	0	0	0	0	0	0	0	0	0	0	0	0	0	0	0	0	0	0	0	0	0	2	0	0	0	0
Gm44281_chr6_66398551_66398716_(-)	Gm44281	chr6	66398551	66398716	-	0	0	0	0	0	0	0	0	0	0	0	0	0	0	0	0	0	0	0	0	0	0	0	0	0	0	0	0	0	0
Gm44233_chr6_66398746_66398971_(+)	Gm44233	chr6	66398746	66398971	+	0	0	0	0	0	0	0	0	0	0	0	0	0	0	0	0	0	0	0	0	0	0	0	0	0	0	0	0	0	0
2610300M13Rik_chr6_66451949_66465738_(-)	2610300M13Rik	chr6	66451949	66465738	-	11	0	13	3	9	1	4	1	2	0	1	0	3	0	2	0	1	0	1	1	1	1	1	0	2	1	1	1	2	1
Gm19764_chr6_66515893_66516541_(+)	Gm19764	chr6	66515893	66516541	+	0	0	0	0	0	0	0	0	0	0	0	0	0	0	0	0	0	0	0	0	0	0	0	0	0	0	0	0	0	0
Gm6786_chr6_66527014_66528928_(+)	Gm6786	chr6	66527014	66528928	+	1	0	0	0	0	0	0	0	0	1	1	0	1	0	0	0	0	0	0	0	0	0	0	0	0	0	0	0	0	0
Mad2l1_chr6_66535390_66547220_(+)	Mad2l1	chr6	66535390	66547220	+	128	45	163	64	141	58	143	67	30	13	34	21	32	15	32	24	19	16	83	71	64	67	64	46	42	43	77	50	72	49
Vmn1r32_chr6_66552180_66560096_(-)	Vmn1r32	chr6	66552180	66560096	-	0	0	0	0	0	0	0	0	0	0	0	0	0	0	0	0	0	0	0	0	0	0	0	0	0	0	0	0	0	0
Gm5307_chr6_66577210_66577969_(+)	Gm5307	chr6	66577210	66577969	+	0	0	0	0	0	0	0	0	0	0	0	0	0	0	0	0	1	1	0	0	0	0	0	0	0	0	0	0	0	0
Vmn1r33_chr6_66610543_66618282_(-)	Vmn1r33	chr6	66610543	66618282	-	0	0	0	0	0	0	0	0	0	0	0	0	0	0	0	0	0	0	0	0	0	0	0	0	0	0	0	0	0	0
Vmn1r34_chr6_66635936_66643879_(-)	Vmn1r34	chr6	66635936	66643879	-	0	0	0	0	0	0	0	0	0	0	0	0	0	0	0	0	0	0	0	0	0	0	0	0	0	0	0	0	0	0
Vmn1r35_chr6_66678070_66685906_(-)	Vmn1r35	chr6	66678070	66685906	-	0	0	0	0	0	0	0	0	0	0	0	0	0	0	0	0	0	0	0	0	0	0	0	0	0	0	0	0	0	0
Gm6794_chr6_66711691_66712147_(+)	Gm6794	chr6	66711691	66712147	+	0	0	0	0	0	0	0	0	0	0	0	0	0	0	0	0	0	0	0	0	0	0	0	0	0	0	0	0	0	0
Vmn1r36_chr6_66715257_66719168_(-)	Vmn1r36	chr6	66715257	66719168	-	0	0	0	0	0	0	0	0	0	0	0	0	0	0	0	0	0	0	0	0	0	0	0	0	0	0	0	0	0	0
Vmn1r37_chr6_66729382_66733039_(+)	Vmn1r37	chr6	66729382	66733039	+	0	0	0	0	0	0	0	0	0	0	0	0	0	0	0	0	0	0	0	0	0	0	0	0	0	0	0	0	0	0
Gm44261_chr6_66733969_66734177_(-)	Gm44261	chr6	66733969	66734177	-	0	0	0	0	0	0	0	0	0	0	0	0	0	0	0	0	0	0	0	0	0	0	0	0	0	0	0	0	0	0
Gm4045_chr6_66746017_66746326_(+)	Gm4045	chr6	66746017	66746326	+	0	0	0	0	0	0	0	0	0	0	0	0	0	0	0	0	0	0	0	0	0	0	0	0	0	0	0	0	0	0
Vmn1r-ps24_chr6_66752276_66760039_(-)	Vmn1r-ps24	chr6	66752276	66760039	-	0	0	0	0	0	0	0	0	0	0	0	0	0	0	0	0	0	0	0	0	0	0	0	0	0	0	0	0	0	0
Vmn1r38_chr6_66774003_66782627_(-)	Vmn1r38	chr6	66774003	66782627	-	0	0	0	0	0	0	0	0	0	0	0	0	0	0	0	0	0	0	0	0	0	0	0	0	0	0	0	0	0	0
Vmn1r39_chr6_66803297_66810609_(-)	Vmn1r39	chr6	66803297	66810609	-	0	0	0	0	0	0	0	0	0	0	0	0	0	0	0	0	0	0	0	0	0	0	0	0	0	0	0	0	0	0
Gm9794_chr6_66875321_66875743_(-)	Gm9794	chr6	66875321	66875743	-	0	3	1	8	0	7	1	3	1	12	0	16	0	17	1	25	0	17	2	6	0	9	1	5	0	13	1	6	1	7
4930597O21Rik_chr6_66894652_66896521_(-)	4930597O21Rik	chr6	66894652	66896521	-	0	0	0	0	0	1	1	0	1	0	0	0	0	0	0	0	0	0	0	0	0	1	0	0	0	0	0	1	0	1
Gng12_chr6_66896397_67021350_(+)	Gng12	chr6	66896397	67021350	+	348	79	286	74	266	77	264	67	83	65	159	61	93	41	152	90	103	46	151	89	152	76	104	50	158	89	145	85	143	85
Gm36816_chr6_66990031_67009260_(-)	Gm36816	chr6	66990031	67009260	-	1	0	0	0	0	0	0	0	0	0	0	0	0	0	1	0	0	0	0	0	0	0	0	0	0	0	0	0	0	0
Gm15644_chr6_67012485_67012871_(+)	Gm15644	chr6	67012485	67012871	+	0	0	0	0	0	0	0	0	0	0	0	0	0	0	0	0	0	0	0	0	0	0	0	0	0	0	0	0	0	0
Gm29848_chr6_67022177_67022471_(+)	Gm29848	chr6	67022177	67022471	+	0	0	0	0	1	0	0	0	0	0	1	0	0	0	0	0	1	0	0	0	0	0	0	0	0	1	0	0	0	0
Gm25260_chr6_67027043_67027176_(+)	Gm25260	chr6	67027043	67027176	+	0	0	0	0	0	0	0	0	0	0	0	0	0	0	0	0	0	0	0	0	0	0	0	0	0	0	0	0	0	0
Gadd45a_chr6_67035096_67037457_(-)	Gadd45a	chr6	67035096	67037457	-	159	33	177	42	140	24	125	24	26	6	47	4	35	11	41	18	42	25	71	19	53	12	67	22	51	20	46	7	43	19
E230016M11Rik_chr6_67036599_67080654_(+)	E230016M11Rik	chr6	67036599	67080654	+	88	21	74	14	51	7	67	9	10	4	31	9	21	9	22	5	14	5	12	5	18	5	23	7	24	9	20	2	21	6
A430010J10Rik_chr6_67115673_67168426_(+)	A430010J10Rik	chr6	67115673	67168426	+	11	19	18	11	7	3	15	5	2	2	12	7	4	3	5	1	3	2	7	7	9	16	7	4	7	2	12	7	5	5
Gm38825_chr6_67179799_67239710_(-)	Gm38825	chr6	67179799	67239710	-	131	4	277	2	293	4	330	5	60	0	113	1	103	3	77	1	62	0	385	8	163	4	142	6	151	6	359	3	164	7
Gm8566_chr6_67205619_67206083_(+)	Gm8566	chr6	67205619	67206083	+	0	2	0	6	1	3	0	0	0	3	0	3	0	4	0	7	1	4	0	1	0	1	0	5	0	2	0	4	0	4
Gm44052_chr6_67221902_67222544_(-)	Gm44052	chr6	67221902	67222544	-	0	0	0	0	1	0	1	0	0	0	0	0	0	0	1	0	0	0	1	0	0	0	1	0	0	0	5	0	0	0
Serbp1_chr6_67238176_67297736_(+)	Serbp1	chr6	67238176	67297736	+	2602	168	3029	227	2692	182	2600	200	802	85	1224	107	1246	116	1409	99	934	103	3238	204	3193	217	2719	209	2981	216	2769	197	3305	224
Gm44050_chr6_67252025_67252928_(-)	Gm44050	chr6	67252025	67252928	-	0	0	1	0	0	0	0	0	0	0	0	0	1	0	0	0	0	0	0	0	0	0	0	0	0	0	0	0	0	0
Il12rb2_chr6_67291318_67376188_(-)	Il12rb2	chr6	67291318	67376188	-	3	1	2	0	2	0	1	1	1	0	1	0	0	0	3	1	2	2	0	4	0	0	1	0	1	0	0	1	3	1
Gm8574_chr6_67384418_67385341_(-)	Gm8574	chr6	67384418	67385341	-	0	0	0	1	0	0	0	1	0	0	1	0	0	0	1	0	0	0	0	0	0	0	0	0	0	0	0	0	0	0
Gm44208_chr6_67406486_67406906_(-)	Gm44208	chr6	67406486	67406906	-	0	0	0	0	0	0	0	0	0	0	0	0	0	0	0	0	0	0	0	0	0	0	0	0	0	0	0	0	0	0
Gm4761_chr6_67414431_67415012_(-)	Gm4761	chr6	67414431	67415012	-	0	0	0	0	0	0	0	0	0	0	1	0	0	0	0	0	0	0	0	0	0	0	0	0	0	0	0	0	0	0
Gm44083_chr6_67417715_67418051_(-)	Gm44083	chr6	67417715	67418051	-	0	0	0	0	0	0	0	0	0	0	0	0	0	0	0	0	0	0	0	0	0	0	0	0	0	0	0	0	0	0
Il23r_chr6_67422932_67491855_(-)	Il23r	chr6	67422932	67491855	-	1	0	0	0	1	1	2	0	0	0	0	0	1	0	1	0	0	1	1	0	0	0	0	0	0	1	0	0	1	0
Gm42889_chr6_67532489_67556204_(+)	Gm42889	chr6	67532489	67556204	+	1	0	0	0	2	0	0	0	0	1	2	0	1	1	0	0	0	0	0	1	0	0	1	0	1	1	0	0	0	0
Tacstd2_chr6_67534062_67535796_(-)	Tacstd2	chr6	67534062	67535796	-	8	1	4	0	6	1	0	0	6	0	3	0	2	0	2	0	3	0	1	0	0	0	2	0	6	0	0	0	0	0
Igkv2-137_chr6_67555497_67556216_(+)	Igkv2-137	chr6	67555497	67556216	+	0	0	0	0	0	0	0	0	0	0	0	0	0	0	0	0	0	0	0	0	0	0	0	0	0	0	0	0	0	0
4930515G16Rik_chr6_67565191_67566446_(-)	4930515G16Rik	chr6	67565191	67566446	-	0	0	0	0	0	0	0	0	0	0	0	0	0	0	0	0	0	0	1	0	0	1	0	0	0	0	0	0	0	0
Igkv1-136_chr6_67594012_67594308_(+)	Igkv1-136	chr6	67594012	67594308	+	0	0	1	0	0	0	0	0	0	0	0	0	0	0	0	0	0	0	0	0	0	0	1	0	0	0	0	0	0	0
Igkv1-135_chr6_67609713_67610508_(+)	Igkv1-135	chr6	67609713	67610508	+	0	0	0	0	0	0	0	0	0	0	0	0	0	0	0	0	0	0	0	0	0	0	0	0	0	0	0	0	0	0
Gm9728_chr6_67633089_67634143_(-)	Gm9728	chr6	67633089	67634143	-	0	0	0	0	0	0	0	0	0	0	0	0	0	0	0	0	0	0	0	0	0	0	0	0	0	0	0	0	0	0
Rpl18a-ps2_chr6_67641530_67641703_(-)	Rpl18a-ps2	chr6	67641530	67641703	-	0	0	0	0	0	0	0	0	0	0	0	0	0	0	0	0	0	0	0	0	0	0	0	0	0	0	0	0	0	0
Igkv14-134-1_chr6_67711174_67711628_(-)	Igkv14-134-1	chr6	67711174	67711628	-	0	0	0	0	0	0	0	0	0	0	0	0	0	0	0	0	0	0	0	0	0	0	0	0	0	0	0	0	0	0
Igkv17-134_chr6_67720729_67721225_(-)	Igkv17-134	chr6	67720729	67721225	-	0	0	0	0	0	0	0	0	0	0	0	0	0	0	0	0	0	0	0	0	0	0	0	0	0	0	0	0	0	0
Igkv1-133_chr6_67724902_67725661_(+)	Igkv1-133	chr6	67724902	67725661	+	0	0	0	0	0	0	0	0	0	0	0	0	0	0	0	0	0	0	0	0	0	0	0	0	0	0	0	0	0	0
Gm5308_chr6_67734251_67735604_(-)	Gm5308	chr6	67734251	67735604	-	0	0	0	0	0	0	0	0	0	0	0	0	0	0	0	0	0	0	0	0	0	1	0	0	0	0	0	0	0	0
Rpl18a-ps3_chr6_67748560_67748730_(-)	Rpl18a-ps3	chr6	67748560	67748730	-	0	0	0	0	0	0	0	0	0	0	0	0	0	0	0	0	0	0	0	0	0	0	0	0	0	0	0	0	0	0
Gm43284_chr6_67754746_67754998_(+)	Gm43284	chr6	67754746	67754998	+	0	0	0	0	0	0	0	0	0	0	0	0	0	0	0	0	0	0	0	0	0	0	0	0	0	0	0	0	0	0
Igkv1-132_chr6_67759700_67760413_(+)	Igkv1-132	chr6	67759700	67760413	+	0	0	0	0	0	0	0	0	0	0	0	0	0	0	0	0	0	0	0	0	0	0	0	0	0	0	0	0	0	0
Igkv1-131_chr6_67766036_67766772_(-)	Igkv1-131	chr6	67766036	67766772	-	0	0	0	0	0	0	0	0	0	0	0	0	0	0	0	0	0	0	0	0	0	0	0	0	0	0	0	0	0	0
Gm18980_chr6_67778250_67779328_(-)	Gm18980	chr6	67778250	67779328	-	0	0	0	0	0	0	0	0	0	0	0	0	0	0	0	0	0	0	0	0	0	0	0	0	0	0	0	0	0	0
Igkv14-130_chr6_67791046_67791511_(+)	Igkv14-130	chr6	67791046	67791511	+	0	0	0	0	0	0	0	0	0	0	0	0	0	0	0	0	0	0	0	0	0	0	0	0	0	0	0	0	0	0
Gm22425_chr6_67792439_67792576_(-)	Gm22425	chr6	67792439	67792576	-	0	0	0	0	0	0	0	0	0	0	0	0	0	0	0	0	0	0	0	0	0	0	0	0	0	0	0	0	0	0
Gm24911_chr6_67804375_67804510_(-)	Gm24911	chr6	67804375	67804510	-	0	0	0	0	0	0	0	0	0	0	0	0	0	0	0	0	0	0	0	0	0	0	0	0	0	0	0	0	0	0
Igkv9-129_chr6_67839793_67840266_(+)	Igkv9-129	chr6	67839793	67840266	+	0	0	0	0	0	0	0	0	0	0	0	0	0	0	0	0	0	0	0	0	0	0	0	0	0	0	0	0	0	0
Igkv9-128_chr6_67847409_67847874_(+)	Igkv9-128	chr6	67847409	67847874	+	0	0	0	0	0	0	0	0	0	0	0	0	0	0	0	0	0	0	0	0	0	0	0	0	0	0	0	0	0	0
Igkv17-127_chr6_67861153_67861659_(+)	Igkv17-127	chr6	67861153	67861659	+	0	0	0	0	0	0	0	0	0	0	0	0	0	0	0	0	0	0	0	0	0	0	0	0	0	0	0	0	0	0
Igkv14-126-1_chr6_67876011_67876477_(+)	Igkv14-126-1	chr6	67876011	67876477	+	0	0	0	0	0	0	0	0	0	0	0	0	0	0	0	0	0	0	0	0	0	0	0	0	0	0	0	0	0	0
Gm9729_chr6_67883346_67883610_(-)	Gm9729	chr6	67883346	67883610	-	0	0	0	0	0	0	0	0	0	0	0	0	0	0	0	0	0	0	0	0	0	0	0	0	0	0	0	0	0	0
Igkv14-126_chr6_67896172_67896642_(+)	Igkv14-126	chr6	67896172	67896642	+	0	0	0	0	0	0	0	0	0	0	0	0	0	0	0	0	0	0	0	0	0	0	0	0	0	0	0	0	0	0
Gm25910_chr6_67897065_67897204_(-)	Gm25910	chr6	67897065	67897204	-	0	0	0	0	0	0	0	0	0	0	0	0	0	0	0	0	0	0	0	0	0	0	0	0	0	0	0	0	0	0
Igkv11-125_chr6_67913573_67914052_(+)	Igkv11-125	chr6	67913573	67914052	+	0	0	0	0	0	0	0	0	0	0	0	0	0	0	0	0	0	0	0	0	0	0	0	0	0	0	0	0	0	0
Igkv9-124_chr6_67942074_67942540_(-)	Igkv9-124	chr6	67942074	67942540	-	0	0	0	0	0	0	0	0	0	0	0	0	0	0	0	0	0	0	0	0	0	0	0	0	0	0	0	0	0	0
Igkv9-123_chr6_67954228_67954714_(-)	Igkv9-123	chr6	67954228	67954714	-	0	0	0	0	0	0	0	0	0	0	0	0	0	0	0	0	0	0	0	0	0	0	0	0	0	0	0	0	0	0
Igkv1-122_chr6_68016718_68017488_(+)	Igkv1-122	chr6	68016718	68017488	+	0	0	0	0	0	1	0	0	0	0	0	0	0	0	0	0	0	0	0	0	0	0	0	0	0	0	0	0	0	0
Igkv17-121_chr6_68036812_68037318_(+)	Igkv17-121	chr6	68036812	68037318	+	0	0	0	0	0	0	0	0	0	0	0	0	0	0	0	0	0	0	0	0	0	0	0	0	0	0	0	0	0	0
Igkv9-120_chr6_68049983_68050456_(+)	Igkv9-120	chr6	68049983	68050456	+	0	0	0	0	0	0	0	0	0	0	0	0	0	0	0	0	0	0	0	0	0	0	0	0	0	0	0	0	0	0
Igkv9-119_chr6_68056345_68056810_(+)	Igkv9-119	chr6	68056345	68056810	+	0	0	0	0	0	0	0	0	0	0	0	0	0	0	0	0	0	0	0	0	0	0	0	0	0	0	0	0	0	0
Igkv14-118-2_chr6_68066369_68066828_(+)	Igkv14-118-2	chr6	68066369	68066828	+	0	0	0	0	0	0	0	0	0	0	0	0	0	0	0	0	0	0	0	0	0	0	0	0	0	0	0	0	0	0
Igkv14-118-1_chr6_68082675_68083121_(+)	Igkv14-118-1	chr6	68082675	68083121	+	0	0	0	0	0	0	0	0	0	0	0	0	0	0	0	0	0	0	0	0	0	0	0	0	0	0	0	0	0	0
Gm43739_chr6_68100569_68100972_(+)	Gm43739	chr6	68100569	68100972	+	0	0	0	0	0	0	0	0	0	0	0	0	0	0	0	0	0	0	0	0	0	0	0	0	0	0	0	0	0	0
Gm5309_chr6_68102790_68103466_(-)	Gm5309	chr6	68102790	68103466	-	0	0	0	0	0	0	0	0	0	1	0	0	0	2	0	0	0	0	0	0	0	0	0	0	0	0	0	0	0	0
Igkv11-118_chr6_68105414_68105880_(+)	Igkv11-118	chr6	68105414	68105880	+	0	0	0	0	0	0	0	0	0	0	0	0	0	0	0	0	0	0	0	0	0	0	0	0	0	0	0	0	0	0
Igkv1-117_chr6_68121046_68121827_(+)	Igkv1-117	chr6	68121046	68121827	+	0	0	0	0	0	0	0	0	0	0	0	0	0	0	0	0	0	0	0	0	0	0	0	0	0	0	0	0	0	0
Gm43171_chr6_68146402_68146692_(-)	Gm43171	chr6	68146402	68146692	-	0	0	0	0	0	0	0	0	0	0	0	0	0	0	0	0	0	0	0	0	0	0	0	0	0	0	0	0	0	0
Gm43170_chr6_68147120_68147847_(+)	Gm43170	chr6	68147120	68147847	+	0	0	0	0	0	0	0	0	0	0	0	0	0	0	0	0	0	0	0	0	0	0	0	0	0	0	0	0	0	0
Igkv2-116_chr6_68151885_68152617_(+)	Igkv2-116	chr6	68151885	68152617	+	0	0	0	0	0	0	0	0	0	0	0	0	0	0	0	0	0	0	0	0	0	0	0	0	0	0	0	0	0	0
Igkv1-115_chr6_68161415_68161716_(+)	Igkv1-115	chr6	68161415	68161716	+	0	0	0	0	0	0	0	0	0	0	0	0	0	0	0	0	0	0	0	0	0	0	0	0	0	0	0	0	0	0
Igkv11-114_chr6_68164457_68164923_(+)	Igkv11-114	chr6	68164457	68164923	+	0	0	0	0	0	0	0	0	0	0	0	0	0	0	0	0	0	0	0	0	0	0	0	0	0	0	0	0	0	0
Igkv2-113_chr6_68178801_68179564_(+)	Igkv2-113	chr6	68178801	68179564	+	0	0	0	0	0	0	0	0	0	0	0	0	0	0	0	0	0	0	0	0	0	0	0	0	0	0	0	0	0	0
Gm4873_chr6_68214051_68215253_(-)	Gm4873	chr6	68214051	68215253	-	0	0	0	0	0	0	0	0	0	0	0	0	0	0	0	0	0	0	0	0	0	0	0	0	0	0	0	0	0	0
Igkv2-112_chr6_68219981_68220706_(+)	Igkv2-112	chr6	68219981	68220706	+	0	0	0	0	0	0	0	0	0	0	0	0	0	0	0	0	0	0	0	0	0	0	0	0	0	0	0	0	0	0
Igkv14-111_chr6_68256389_68256869_(+)	Igkv14-111	chr6	68256389	68256869	+	0	0	0	0	0	0	0	0	0	0	0	0	0	0	0	0	0	0	0	0	0	0	0	0	0	0	0	0	0	0
Gm25436_chr6_68257394_68257538_(-)	Gm25436	chr6	68257394	68257538	-	0	0	0	0	0	0	0	0	0	0	0	0	0	0	0	0	0	0	0	0	0	0	0	0	0	0	0	0	0	0
Igkv1-110_chr6_68270485_68271267_(+)	Igkv1-110	chr6	68270485	68271267	+	0	0	0	0	0	0	0	0	0	0	0	0	0	0	0	0	0	0	0	0	0	0	0	0	0	0	0	0	0	0
Gm43007_chr6_68297002_68297292_(-)	Gm43007	chr6	68297002	68297292	-	0	0	0	0	0	0	0	0	0	0	0	0	0	0	0	0	0	0	0	0	0	0	0	0	0	0	0	0	0	0
Gm42612_chr6_68297762_68298489_(+)	Gm42612	chr6	68297762	68298489	+	0	0	0	0	0	0	0	0	0	0	0	0	0	0	0	0	0	0	0	0	0	0	0	0	0	0	0	0	0	0
Igkv2-109_chr6_68302427_68303158_(+)	Igkv2-109	chr6	68302427	68303158	+	0	0	0	0	0	0	0	0	0	0	0	0	0	0	0	0	0	0	0	0	0	0	0	0	0	0	0	0	0	0
Igkv1-108_chr6_68312062_68312359_(+)	Igkv1-108	chr6	68312062	68312359	+	0	0	0	0	0	0	0	0	0	0	0	0	0	0	0	0	0	0	0	0	0	0	0	0	0	0	0	0	0	0
Igkv2-107_chr6_68326098_68326752_(+)	Igkv2-107	chr6	68326098	68326752	+	0	0	0	0	0	0	0	0	0	0	0	0	0	0	0	0	0	0	0	0	0	0	0	0	0	0	0	0	0	0
Igkv11-106_chr6_68339527_68339995_(+)	Igkv11-106	chr6	68339527	68339995	+	0	0	0	0	0	0	0	0	0	0	0	0	0	0	0	0	0	0	0	0	0	0	0	0	0	0	0	0	0	0
Igkv2-105_chr6_68348647_68349441_(+)	Igkv2-105	chr6	68348647	68349441	+	0	0	0	0	0	0	0	0	0	0	0	0	0	0	0	0	0	0	0	0	0	0	0	0	0	0	0	0	0	0
Gm5310_chr6_68387561_68389071_(-)	Gm5310	chr6	68387561	68389071	-	0	0	0	0	0	0	0	0	0	0	0	0	0	0	0	0	1	0	0	0	0	0	0	0	0	0	0	0	0	0
Igkv16-104_chr6_68425575_68426072_(+)	Igkv16-104	chr6	68425575	68426072	+	0	0	0	0	0	0	0	0	0	0	0	0	0	0	0	0	0	0	0	0	0	0	0	0	0	0	0	0	0	0
Igkv15-103_chr6_68437440_68437925_(+)	Igkv15-103	chr6	68437440	68437925	+	0	0	0	0	0	0	0	0	0	0	0	0	0	0	0	0	0	0	0	0	0	0	0	0	0	0	0	0	0	0
Igkv15-102_chr6_68466126_68466412_(-)	Igkv15-102	chr6	68466126	68466412	-	0	0	0	0	0	0	0	0	0	0	0	0	0	0	0	0	0	0	0	0	0	0	0	0	0	0	0	0	0	0
Igkv20-101-2_chr6_68474613_68475101_(+)	Igkv20-101-2	chr6	68474613	68475101	+	0	0	0	0	0	0	0	0	0	0	0	0	0	0	0	0	0	0	0	0	0	0	0	0	0	0	0	0	0	0
Igkv15-101-1_chr6_68479316_68479573_(+)	Igkv15-101-1	chr6	68479316	68479573	+	0	0	0	0	0	0	0	0	0	0	0	0	0	0	0	0	0	0	0	0	0	0	0	0	0	0	0	0	0	0
Igkv15-101_chr6_68481421_68481719_(-)	Igkv15-101	chr6	68481421	68481719	-	0	0	0	0	0	0	0	0	0	0	0	0	0	0	0	0	0	0	0	0	0	0	0	0	0	0	0	0	0	0
Igkv14-100_chr6_68519012_68519477_(+)	Igkv14-100	chr6	68519012	68519477	+	0	0	0	0	0	0	0	0	0	0	0	0	0	0	0	0	0	0	0	0	0	0	0	0	0	0	0	0	0	0
Gm25833_chr6_68532744_68532876_(+)	Gm25833	chr6	68532744	68532876	+	0	0	0	0	0	0	0	0	0	0	0	0	0	0	0	0	0	0	0	0	0	0	0	0	0	0	0	0	0	0
Igkv1-99_chr6_68541644_68542422_(+)	Igkv1-99	chr6	68541644	68542422	+	0	0	0	0	0	0	0	0	0	0	0	0	0	0	0	0	0	0	0	0	0	0	0	0	0	0	0	0	0	0
Igkv12-98_chr6_68570763_68571235_(+)	Igkv12-98	chr6	68570763	68571235	+	0	0	0	0	0	0	0	0	0	0	0	0	0	0	0	0	0	0	0	0	0	0	0	0	0	0	0	0	0	0
Igkv15-97_chr6_68591374_68591832_(+)	Igkv15-97	chr6	68591374	68591832	+	0	0	0	0	0	0	0	0	0	0	0	0	0	0	0	0	0	0	0	0	0	0	0	0	0	0	0	0	0	0
Igkv10-96_chr6_68631963_68632442_(-)	Igkv10-96	chr6	68631963	68632442	-	0	0	0	1	0	0	0	0	0	0	0	0	0	0	0	0	0	0	0	0	0	0	0	0	0	0	0	0	0	0
Igkv2-95-2_chr6_68647415_68648121_(-)	Igkv2-95-2	chr6	68647415	68648121	-	0	0	0	0	0	0	0	0	0	0	0	0	0	0	0	0	0	0	0	0	0	0	0	0	0	0	0	0	0	0
Igkv2-95-1_chr6_68671162_68671883_(+)	Igkv2-95-1	chr6	68671162	68671883	+	0	0	0	0	0	0	0	0	0	0	0	0	0	0	0	0	0	0	0	0	0	0	0	0	0	0	0	0	0	0
Igkv10-95_chr6_68680379_68680848_(+)	Igkv10-95	chr6	68680379	68680848	+	0	0	0	0	0	0	0	0	0	0	0	0	0	0	0	0	0	0	0	0	0	0	0	0	0	0	0	0	0	0
Igkv10-94_chr6_68704508_68704978_(-)	Igkv10-94	chr6	68704508	68704978	-	0	0	0	0	0	0	0	0	0	0	0	0	0	0	0	0	0	0	0	0	0	0	0	0	0	0	0	0	0	0
Igkv2-93-1_chr6_68712374_68713098_(-)	Igkv2-93-1	chr6	68712374	68713098	-	0	0	0	0	0	0	0	0	0	0	0	0	0	0	0	0	0	0	0	0	0	0	0	0	0	0	0	0	0	0
Gm40414_chr6_68734181_68734661_(-)	Gm40414	chr6	68734181	68734661	-	0	0	0	0	0	0	0	0	0	0	0	0	0	0	0	0	0	0	0	0	0	0	0	0	0	0	0	0	0	0
Igkv19-93_chr6_68736297_68736780_(-)	Igkv19-93	chr6	68736297	68736780	-	0	0	0	0	0	0	0	0	0	0	0	0	0	0	0	0	0	0	0	0	0	0	0	0	0	0	0	0	0	0
Igkv4-92_chr6_68755038_68755593_(-)	Igkv4-92	chr6	68755038	68755593	-	0	0	0	0	0	0	0	0	0	0	0	0	0	0	0	0	0	0	0	0	0	0	0	0	0	0	0	0	0	0
Gm42925_chr6_68763282_68763692_(-)	Gm42925	chr6	68763282	68763692	-	0	0	0	0	0	0	0	0	0	0	0	0	0	0	0	0	0	0	0	0	0	0	0	0	0	0	0	0	0	0
Igkv4-91_chr6_68768555_68769103_(-)	Igkv4-91	chr6	68768555	68769103	-	0	0	0	0	0	0	0	0	0	0	0	0	0	0	0	0	0	0	0	0	0	0	0	0	0	0	0	0	0	0
Igkv4-90_chr6_68807179_68807708_(-)	Igkv4-90	chr6	68807179	68807708	-	0	0	0	0	0	0	1	0	0	0	0	0	0	0	0	0	0	0	0	0	0	0	0	0	0	0	0	0	0	0
Gm42924_chr6_68810669_68810853_(+)	Gm42924	chr6	68810669	68810853	+	0	0	0	0	0	0	0	0	0	0	0	0	0	0	0	0	0	0	0	0	0	0	0	0	0	0	0	0	0	0
Igkv12-89_chr6_68834846_68835307_(-)	Igkv12-89	chr6	68834846	68835307	-	0	0	0	0	0	0	0	0	0	0	0	0	0	0	0	0	0	0	0	0	0	0	0	0	0	0	0	0	0	0
Igkv1-88_chr6_68862265_68863031_(-)	Igkv1-88	chr6	68862265	68863031	-	0	0	0	0	0	0	0	0	0	0	0	0	0	0	0	0	0	0	0	0	0	0	0	0	0	0	0	0	0	0
Gm42539_chr6_68875428_68875823_(-)	Gm42539	chr6	68875428	68875823	-	0	0	0	0	0	0	0	0	0	0	0	0	0	0	0	0	0	0	0	0	0	0	0	0	0	0	0	0	0	0
Gm42543_chr6_68880178_68880674_(-)	Gm42543	chr6	68880178	68880674	-	0	0	0	0	0	0	0	0	0	0	0	0	0	0	0	0	0	0	0	0	0	0	0	0	0	0	0	0	0	0
Gm42542_chr6_68893580_68893982_(-)	Gm42542	chr6	68893580	68893982	-	0	0	0	0	0	0	1	0	0	0	0	0	0	0	0	0	0	0	0	0	0	0	0	0	0	0	0	0	0	0
Igkv13-87_chr6_68902981_68903266_(+)	Igkv13-87	chr6	68902981	68903266	+	0	0	0	0	0	0	0	0	0	0	0	0	0	0	0	0	0	0	0	0	0	0	0	0	0	0	0	0	0	0
Gm43710_chr6_68909406_68909857_(+)	Gm43710	chr6	68909406	68909857	+	0	0	0	0	0	0	0	0	0	0	0	0	0	0	0	0	0	0	0	0	0	0	0	0	0	0	0	0	0	0
Igkv4-86_chr6_68910411_68910973_(-)	Igkv4-86	chr6	68910411	68910973	-	0	0	0	0	0	0	0	0	0	0	0	0	0	0	0	0	0	0	0	0	0	0	0	0	0	0	0	0	0	0
Igkv13-85_chr6_68930269_68930734_(-)	Igkv13-85	chr6	68930269	68930734	-	0	0	0	0	0	0	0	0	0	0	0	0	0	0	0	0	0	0	0	0	0	0	0	0	0	0	0	0	0	0
Igkv13-84_chr6_68939602_68940067_(+)	Igkv13-84	chr6	68939602	68940067	+	0	0	0	0	0	0	0	0	0	0	0	0	0	0	0	0	0	0	0	0	0	0	0	0	0	0	0	0	0	0
Igkv4-83_chr6_68961378_68962007_(-)	Igkv4-83	chr6	68961378	68962007	-	0	0	0	0	0	0	0	0	0	0	0	0	0	0	0	0	0	0	0	0	0	0	0	0	0	0	0	0	0	0
Igkv13-82_chr6_68979198_68979663_(+)	Igkv13-82	chr6	68979198	68979663	+	0	0	0	0	0	0	0	0	0	0	0	0	0	0	0	0	0	0	0	0	0	0	0	0	0	0	0	0	0	0
Igkv4-81_chr6_68990758_68991294_(-)	Igkv4-81	chr6	68990758	68991294	-	0	0	0	0	0	0	0	0	0	0	0	0	0	0	0	0	0	0	0	0	0	0	0	0	0	0	0	0	0	0
Igkv13-80-1_chr6_69009143_69009513_(+)	Igkv13-80-1	chr6	69009143	69009513	+	0	0	0	0	0	0	0	0	0	0	0	0	0	0	0	0	0	0	0	0	0	0	0	0	0	0	0	0	0	0
Igkv4-80_chr6_69016558_69017080_(-)	Igkv4-80	chr6	69016558	69017080	-	0	0	0	0	0	0	0	0	0	0	0	0	0	0	0	0	0	0	0	0	0	0	0	0	0	0	0	0	0	0
Igkv4-79_chr6_69042972_69043505_(-)	Igkv4-79	chr6	69042972	69043505	-	0	0	0	0	0	0	0	0	0	0	0	0	0	0	0	0	0	0	0	0	0	0	0	0	0	0	0	0	0	0
Igkv13-78-1_chr6_69051617_69051816_(+)	Igkv13-78-1	chr6	69051617	69051816	+	0	0	0	0	0	0	0	0	0	0	0	0	0	0	0	0	0	0	0	0	0	0	0	0	0	0	0	0	0	0
Igkv4-78_chr6_69059690_69060224_(-)	Igkv4-78	chr6	69059690	69060224	-	0	0	0	0	0	0	2	0	0	0	0	0	0	0	0	0	0	0	0	0	0	0	0	0	0	0	0	0	0	0
Gm43583_chr6_69086185_69086487_(+)	Gm43583	chr6	69086185	69086487	+	0	0	0	0	0	0	0	0	0	0	0	0	0	0	0	0	0	0	0	0	0	0	0	0	0	0	0	0	0	0
Igkv4-77_chr6_69110904_69111432_(-)	Igkv4-77	chr6	69110904	69111432	-	0	0	0	0	0	0	0	0	0	0	0	0	0	0	0	0	0	0	0	0	0	0	0	0	0	0	0	0	0	0
Igkv13-76_chr6_69137866_69138332_(+)	Igkv13-76	chr6	69137866	69138332	+	0	0	0	0	0	0	0	0	0	0	0	0	0	0	0	0	0	0	0	0	0	0	0	0	0	0	0	0	0	0
Igkv4-75_chr6_69156118_69156659_(-)	Igkv4-75	chr6	69156118	69156659	-	0	0	0	0	0	0	0	0	0	0	0	0	0	0	0	0	0	0	0	0	0	0	0	0	0	0	0	0	0	0
Igkv13-74-1_chr6_69177423_69177787_(+)	Igkv13-74-1	chr6	69177423	69177787	+	0	0	0	0	0	0	0	0	0	0	0	0	0	0	0	0	0	0	0	0	0	0	0	0	0	0	0	0	0	0
Igkv4-74_chr6_69184826_69185397_(-)	Igkv4-74	chr6	69184826	69185397	-	0	0	0	0	0	0	0	0	0	0	0	0	0	0	0	0	0	0	0	0	0	0	0	0	0	0	0	0	0	0
Igkv13-73-1_chr6_69190083_69190282_(+)	Igkv13-73-1	chr6	69190083	69190282	+	0	0	0	0	0	0	0	0	0	0	0	0	0	0	0	0	0	0	0	0	0	0	0	0	0	0	0	0	0	0
Igkv4-73_chr6_69197583_69198116_(-)	Igkv4-73	chr6	69197583	69198116	-	0	0	0	0	0	0	0	0	0	0	0	0	0	0	0	0	0	0	0	0	0	0	0	0	0	0	0	0	0	0
Igkv4-72_chr6_69226854_69227433_(-)	Igkv4-72	chr6	69226854	69227433	-	0	0	0	0	0	0	0	0	0	0	0	0	0	0	0	0	0	0	0	0	0	0	0	0	0	0	0	0	0	0
Igkv13-71-1_chr6_69235758_69236158_(+)	Igkv13-71-1	chr6	69235758	69236158	+	0	0	0	0	0	0	0	0	0	0	0	0	0	0	0	0	0	0	0	0	0	0	0	0	0	0	0	0	0	0
Igkv4-71_chr6_69243158_69243688_(-)	Igkv4-71	chr6	69243158	69243688	-	0	0	0	0	0	0	0	0	0	0	0	0	0	0	0	0	0	0	0	0	0	0	0	0	0	0	0	0	0	0
Igkv4-70_chr6_69267888_69268443_(-)	Igkv4-70	chr6	69267888	69268443	-	0	0	0	0	0	0	0	0	0	0	0	0	0	0	0	0	0	0	0	0	1	0	0	0	0	0	0	0	0	0
Igkv4-69_chr6_69283794_69284319_(-)	Igkv4-69	chr6	69283794	69284319	-	0	0	0	0	0	0	0	0	0	0	0	0	0	0	0	0	0	0	0	0	0	0	0	0	0	0	0	0	0	0
Igkv4-68_chr6_69304834_69305405_(-)	Igkv4-68	chr6	69304834	69305405	-	0	0	0	0	0	0	0	0	0	0	0	0	0	0	0	0	0	0	0	0	0	0	0	0	0	0	0	0	0	0
Igkv12-67_chr6_69324177_69324652_(-)	Igkv12-67	chr6	69324177	69324652	-	0	0	0	0	0	0	0	0	0	0	0	0	0	0	0	0	0	0	0	0	0	0	0	0	0	0	0	0	0	0
Rprl1_chr6_69326844_69327170_(-)	Rprl1	chr6	69326844	69327170	-	1	5	0	1	0	4	0	5	1	7	1	5	0	9	0	9	0	5	1	2	0	14	0	5	0	4	0	3	0	6
Rprl1_chr6_69326937_69327174_(-)	Rprl1	chr6	69326937	69327174	-	0	0	0	0	0	0	0	0	0	0	0	0	0	0	0	0	0	0	0	0	0	0	0	0	0	0	0	0	0	0
Igkv12-66_chr6_69334604_69335076_(-)	Igkv12-66	chr6	69334604	69335076	-	0	0	0	0	0	0	0	0	0	0	0	0	0	0	0	0	0	0	0	0	0	0	0	0	0	0	0	0	0	0
Igkv4-65_chr6_69342472_69343004_(-)	Igkv4-65	chr6	69342472	69343004	-	0	0	0	0	0	0	0	0	0	0	0	0	0	0	0	0	0	0	0	0	0	0	0	0	0	0	0	0	0	0
Igkv13-64_chr6_69362725_69363187_(+)	Igkv13-64	chr6	69362725	69363187	+	0	0	0	0	0	0	0	0	0	0	0	0	0	0	0	0	0	0	0	0	0	0	0	0	0	0	0	0	0	0
Igkv4-63_chr6_69377944_69378472_(-)	Igkv4-63	chr6	69377944	69378472	-	0	0	0	0	0	0	0	0	0	0	0	0	0	0	0	0	0	0	0	0	0	0	0	0	0	0	0	0	0	0
Igkv13-62-1_chr6_69392424_69392870_(+)	Igkv13-62-1	chr6	69392424	69392870	+	0	0	0	0	0	0	0	0	0	0	0	0	0	0	0	0	0	0	0	0	0	0	0	0	0	0	0	0	0	0
Igkv4-62_chr6_69399810_69400344_(-)	Igkv4-62	chr6	69399810	69400344	-	0	0	0	0	0	0	0	0	0	0	0	0	0	0	0	0	0	0	0	0	0	0	0	0	0	0	0	0	0	0
Igkv13-61-1_chr6_69409506_69409929_(+)	Igkv13-61-1	chr6	69409506	69409929	+	0	0	0	0	0	0	0	0	0	0	0	0	0	0	0	0	0	0	0	0	0	0	0	0	0	0	0	0	0	0
Igkv4-61_chr6_69416893_69417455_(-)	Igkv4-61	chr6	69416893	69417455	-	0	0	0	0	0	0	0	0	0	0	0	0	0	0	0	0	0	0	0	0	0	0	0	0	0	0	0	0	0	0
Igkv4-59_chr6_69438218_69438757_(-)	Igkv4-59	chr6	69438218	69438757	-	0	0	0	0	0	0	0	0	0	0	0	0	0	0	0	0	0	0	0	0	0	0	0	0	0	0	0	0	0	0
Igkv4-60_chr6_69463194_69463725_(-)	Igkv4-60	chr6	69463194	69463725	-	0	0	0	0	0	0	0	0	0	0	0	0	0	0	0	0	0	0	0	0	0	0	0	0	0	0	0	0	0	0
Igkv4-58_chr6_69500254_69500786_(-)	Igkv4-58	chr6	69500254	69500786	-	0	0	0	0	0	0	0	0	0	0	0	0	0	0	0	0	0	0	0	0	0	0	0	0	0	0	0	0	0	0
Rn7s6_chr6_69516339_69516629_(+)	Rn7s6	chr6	69516339	69516629	+	0	0	0	0	0	0	0	0	0	0	0	0	0	0	0	0	0	0	0	0	0	0	0	0	0	0	0	0	0	0
Gm47304_chr6_69516481_69516550_(+)	Gm47304	chr6	69516481	69516550	+	0	0	0	0	0	0	0	0	0	0	0	0	0	0	0	0	0	0	0	0	0	0	0	0	0	0	0	0	0	0
Igkv13-57-2_chr6_69523554_69524016_(+)	Igkv13-57-2	chr6	69523554	69524016	+	0	0	0	0	0	0	0	0	1	0	0	0	0	0	0	0	0	0	0	0	0	0	0	0	0	0	0	0	0	1
Igkv4-57-1_chr6_69544359_69544907_(-)	Igkv4-57-1	chr6	69544359	69544907	-	0	0	0	0	0	0	0	0	0	0	0	0	0	0	0	0	0	0	0	0	0	0	0	0	0	0	0	0	0	0
Igkv13-57-1_chr6_69569737_69570159_(+)	Igkv13-57-1	chr6	69569737	69570159	+	0	0	0	0	0	0	0	0	0	0	0	0	0	0	0	0	0	0	0	0	0	0	0	0	0	0	0	0	0	0
Igkv4-57_chr6_69575975_69576500_(-)	Igkv4-57	chr6	69575975	69576500	-	0	0	0	0	0	0	0	0	0	0	0	0	0	0	0	0	0	0	0	0	0	0	0	0	0	0	0	0	0	0
Igkv13-56-1_chr6_69581244_69581452_(+)	Igkv13-56-1	chr6	69581244	69581452	+	0	0	0	0	0	0	0	0	0	0	0	0	0	0	0	0	0	0	0	0	0	0	0	0	0	0	0	0	0	0
Igkv4-56_chr6_69587295_69587810_(-)	Igkv4-56	chr6	69587295	69587810	-	0	0	0	0	0	0	0	0	0	0	0	0	0	0	0	0	0	0	0	0	0	0	0	0	0	0	0	1	0	0
Igkv13-55-1_chr6_69599887_69600316_(+)	Igkv13-55-1	chr6	69599887	69600316	+	0	0	0	0	0	0	0	0	0	0	0	0	0	0	0	0	0	0	0	0	0	0	0	0	0	0	0	0	0	0
Igkv4-55_chr6_69607275_69607828_(-)	Igkv4-55	chr6	69607275	69607828	-	0	0	0	0	0	0	0	0	0	0	0	0	0	0	0	0	0	0	0	0	0	0	0	0	0	0	0	0	0	0
Igkv13-54-1_chr6_69617048_69617477_(+)	Igkv13-54-1	chr6	69617048	69617477	+	0	0	0	0	0	0	0	0	0	0	0	0	0	0	0	0	0	0	0	0	0	0	0	0	0	0	0	0	0	0
Igkv4-54_chr6_69631646_69632178_(-)	Igkv4-54	chr6	69631646	69632178	-	0	0	0	0	0	0	0	0	0	0	0	0	0	0	0	0	0	0	0	0	0	0	0	0	0	0	0	0	0	0
Igkv4-53_chr6_69648824_69649363_(-)	Igkv4-53	chr6	69648824	69649363	-	0	0	0	0	0	0	0	0	0	0	0	0	0	0	0	0	0	0	0	0	0	0	0	0	0	0	0	0	0	0
Gm42606_chr6_69661094_69661468_(+)	Gm42606	chr6	69661094	69661468	+	0	0	0	0	0	0	0	0	0	0	0	0	0	0	0	0	0	0	0	0	0	0	0	0	0	0	0	0	0	0
Igkv4-51_chr6_69681406_69681975_(-)	Igkv4-51	chr6	69681406	69681975	-	0	0	0	0	0	0	0	0	0	0	0	0	0	0	0	0	0	0	0	0	0	0	0	0	0	0	0	0	0	0
Gm42958_chr6_69693295_69693612_(+)	Gm42958	chr6	69693295	69693612	+	0	0	0	0	0	0	0	0	0	0	0	0	0	0	0	0	0	0	0	0	0	0	0	0	0	0	0	0	0	0
Igkv4-50_chr6_69700767_69701287_(-)	Igkv4-50	chr6	69700767	69701287	-	0	0	0	0	0	0	0	0	0	0	0	0	0	0	0	0	0	0	0	0	0	0	0	0	0	0	0	0	0	0
Igkv12-49_chr6_69716562_69716956_(-)	Igkv12-49	chr6	69716562	69716956	-	0	0	0	0	0	0	0	0	0	0	0	0	0	0	0	0	0	0	0	0	0	0	0	0	0	0	0	0	0	0
Igkv5-48_chr6_69726573_69727138_(-)	Igkv5-48	chr6	69726573	69727138	-	0	0	0	0	0	0	0	0	0	0	0	0	0	0	0	0	0	0	0	0	0	0	0	0	0	0	0	0	0	0
Igkv12-47_chr6_69750854_69751331_(-)	Igkv12-47	chr6	69750854	69751331	-	0	0	0	0	0	0	0	0	0	0	0	0	0	0	0	0	0	0	0	0	0	0	0	0	0	0	0	0	0	0
Igkv12-46_chr6_69764523_69765022_(-)	Igkv12-46	chr6	69764523	69765022	-	0	0	0	0	0	0	0	0	0	0	0	0	0	0	0	0	0	0	0	0	0	0	0	0	0	0	0	0	0	0
Igkv5-45_chr6_69775750_69776344_(-)	Igkv5-45	chr6	69775750	69776344	-	0	0	0	0	0	0	0	0	0	0	0	0	0	0	0	0	0	0	0	0	0	0	0	0	0	0	0	0	0	0
Igkv12-44_chr6_69814631_69815154_(-)	Igkv12-44	chr6	69814631	69815154	-	0	0	0	0	0	0	0	0	0	0	0	0	0	0	0	0	0	0	0	0	0	0	0	0	0	0	0	0	0	0
Igkv5-43_chr6_69823355_69823943_(-)	Igkv5-43	chr6	69823355	69823943	-	0	0	0	0	0	0	0	0	0	0	0	0	0	0	0	0	0	0	0	0	0	0	0	0	0	0	0	0	0	0
Igkv12-42_chr6_69834792_69835241_(-)	Igkv12-42	chr6	69834792	69835241	-	0	0	0	0	0	0	0	0	0	0	0	0	0	0	0	0	0	0	0	0	0	0	0	0	0	0	0	0	0	0
Igkv12-41_chr6_69858420_69858884_(-)	Igkv12-41	chr6	69858420	69858884	-	0	0	0	0	0	0	0	0	0	0	0	0	0	0	0	0	0	0	0	0	0	0	0	0	0	0	0	0	0	0
Igkv5-40-1_chr6_69868627_69869193_(-)	Igkv5-40-1	chr6	69868627	69869193	-	0	0	0	0	0	0	0	0	0	0	0	0	0	0	0	0	0	0	0	0	0	0	0	0	0	0	0	0	0	0
Igkv12-40_chr6_69879350_69879819_(-)	Igkv12-40	chr6	69879350	69879819	-	0	0	0	0	0	0	0	0	0	0	0	0	0	0	0	0	0	0	0	0	0	0	0	0	0	0	0	0	0	0
Igkv5-39_chr6_69900424_69900977_(-)	Igkv5-39	chr6	69900424	69900977	-	0	0	0	0	0	0	0	0	0	0	0	0	0	0	0	0	0	0	0	0	0	0	0	0	0	0	0	0	0	0
Gm43220_chr6_69927621_69927902_(-)	Gm43220	chr6	69927621	69927902	-	0	0	0	0	0	0	0	0	0	0	0	0	0	0	0	0	0	0	0	0	0	0	0	0	0	0	0	0	0	0
Igkv12-38_chr6_69943186_69943648_(-)	Igkv12-38	chr6	69943186	69943648	-	0	0	0	0	0	0	0	0	0	0	0	0	0	0	0	0	0	0	0	0	0	0	0	0	0	0	0	0	0	0
Igkv5-37_chr6_69963312_69963873_(-)	Igkv5-37	chr6	69963312	69963873	-	0	0	0	0	0	0	0	0	0	0	0	0	0	0	0	0	0	0	0	0	0	0	0	0	0	0	0	0	0	0
Igkv18-36_chr6_69992465_69992977_(-)	Igkv18-36	chr6	69992465	69992977	-	0	0	0	0	0	0	0	0	0	0	0	0	0	0	0	0	0	0	0	0	0	0	0	0	0	0	0	0	0	0
Igkv1-35_chr6_70010949_70011673_(-)	Igkv1-35	chr6	70010949	70011673	-	0	0	0	0	0	0	0	0	0	0	0	0	0	0	0	0	0	0	0	0	0	0	0	0	0	0	0	0	0	0
Gm23694_chr6_70027982_70028091_(-)	Gm23694	chr6	70027982	70028091	-	0	0	0	0	0	0	0	0	0	0	0	0	0	0	0	0	0	0	0	0	0	0	0	0	0	0	0	0	0	0
Gm43586_chr6_70040338_70040647_(-)	Gm43586	chr6	70040338	70040647	-	0	0	0	0	0	0	0	0	0	0	0	0	0	0	0	0	0	0	0	0	0	0	0	0	0	0	0	0	0	0
Igkv8-34_chr6_70044112_70044678_(-)	Igkv8-34	chr6	70044112	70044678	-	0	0	0	0	0	0	0	0	0	0	0	0	0	0	0	0	0	0	0	0	0	0	0	0	0	0	0	0	0	0
Igkv7-33_chr6_70058632_70059199_(-)	Igkv7-33	chr6	70058632	70059199	-	0	0	0	0	0	0	0	0	0	0	0	0	0	0	0	0	0	0	0	0	0	0	0	0	0	0	0	0	0	0
Igkv6-32_chr6_70074024_70074603_(-)	Igkv6-32	chr6	70074024	70074603	-	0	0	0	0	0	0	1	0	0	0	0	0	0	0	0	0	0	0	0	1	0	0	0	0	0	0	1	1	0	0
Igkv8-31_chr6_70105860_70106415_(-)	Igkv8-31	chr6	70105860	70106415	-	0	0	0	0	0	0	0	0	0	0	0	0	0	0	0	0	0	0	0	0	0	0	0	0	0	0	0	0	0	0
Igkv8-30_chr6_70117061_70117620_(-)	Igkv8-30	chr6	70117061	70117620	-	0	0	0	0	0	0	0	0	0	0	0	0	0	0	0	0	0	0	0	0	0	0	0	0	0	0	0	0	0	0
Gm42818_chr6_70129652_70130638_(+)	Gm42818	chr6	70129652	70130638	+	0	0	0	0	0	0	0	0	0	0	0	0	0	0	0	0	0	0	0	0	0	0	0	0	0	0	0	0	0	0
Igkv6-29_chr6_70138462_70139110_(-)	Igkv6-29	chr6	70138462	70139110	-	0	0	0	0	0	0	0	0	0	0	0	0	0	0	0	0	0	0	0	0	0	0	0	0	0	0	0	0	0	0
Igkv8-28_chr6_70143593_70144166_(-)	Igkv8-28	chr6	70143593	70144166	-	0	0	0	0	0	0	0	0	0	0	0	0	0	0	0	0	0	0	0	0	0	0	0	0	0	0	0	0	0	0
Gm24096_chr6_70147936_70148045_(-)	Gm24096	chr6	70147936	70148045	-	0	0	0	0	0	0	0	0	0	0	0	0	0	0	0	0	0	0	0	0	0	0	0	0	0	0	0	0	0	0
Igkv8-27_chr6_70171809_70172270_(-)	Igkv8-27	chr6	70171809	70172270	-	0	0	0	0	0	0	0	0	0	0	0	0	0	0	0	0	0	0	0	0	0	0	0	0	0	0	0	0	0	0
Igkv8-26_chr6_70193228_70193797_(+)	Igkv8-26	chr6	70193228	70193797	+	0	0	0	0	0	0	0	0	0	0	0	0	0	0	0	0	0	0	0	0	0	0	0	0	0	0	0	0	0	0
Gm8828_chr6_70209552_70213767_(-)	Gm8828	chr6	70209552	70213767	-	0	0	0	0	0	0	0	0	0	0	0	0	0	0	0	0	0	0	0	0	0	0	0	0	0	0	0	0	0	0
Igkv6-25_chr6_70215400_70215957_(+)	Igkv6-25	chr6	70215400	70215957	+	0	0	0	0	0	0	0	0	0	0	0	0	0	0	0	0	0	0	0	0	0	0	0	0	0	0	0	0	0	0
Igkv8-24_chr6_70216858_70217421_(-)	Igkv8-24	chr6	70216858	70217421	-	0	0	0	0	0	0	0	0	0	0	0	0	0	0	0	0	0	0	0	0	0	0	0	0	0	0	0	0	0	0
Gm43218_chr6_70240427_70240972_(-)	Gm43218	chr6	70240427	70240972	-	0	0	0	0	0	0	0	0	0	0	0	0	0	0	0	0	0	0	0	0	0	0	0	0	0	0	0	0	0	0
Igkv6-23_chr6_70260409_70260955_(-)	Igkv6-23	chr6	70260409	70260955	-	0	0	0	0	0	0	0	0	0	0	0	0	0	0	0	0	0	0	0	0	0	0	0	0	0	0	0	0	0	0
Gm8836_chr6_70262565_70263912_(+)	Gm8836	chr6	70262565	70263912	+	0	0	0	0	0	0	0	0	0	0	0	0	0	0	0	0	0	0	0	0	0	0	0	0	0	0	0	0	0	0
Gm11065_chr6_70295177_70295406_(+)	Gm11065	chr6	70295177	70295406	+	0	0	0	0	0	0	0	0	0	0	0	0	0	0	0	0	0	0	0	0	0	0	0	0	0	0	0	0	0	0
Igkv8-22_chr6_70297554_70298119_(-)	Igkv8-22	chr6	70297554	70298119	-	0	0	0	0	0	0	0	0	0	0	0	0	0	0	0	0	0	0	0	0	0	0	0	0	0	0	0	0	0	0
Igkv8-21_chr6_70314895_70315472_(-)	Igkv8-21	chr6	70314895	70315472	-	0	0	0	0	0	0	0	0	0	0	0	0	0	0	0	0	0	0	0	0	0	0	0	0	0	0	0	0	0	0
Amd-ps5_chr6_70327036_70328024_(+)	Amd-ps5	chr6	70327036	70328024	+	0	0	0	0	0	0	0	0	0	0	0	0	0	0	0	0	0	0	0	0	0	0	0	0	0	0	0	0	0	0
Igkv6-20_chr6_70335841_70336507_(-)	Igkv6-20	chr6	70335841	70336507	-	0	0	0	0	0	0	0	0	0	0	0	0	0	0	0	0	0	0	0	0	0	0	0	0	0	0	0	0	0	0
Igkv8-19_chr6_70340876_70341453_(-)	Igkv8-19	chr6	70340876	70341453	-	0	0	0	0	0	0	0	0	0	0	0	0	0	0	0	0	0	0	0	0	0	0	0	0	0	0	0	0	0	0
Igkv8-18_chr6_70355852_70356445_(+)	Igkv8-18	chr6	70355852	70356445	+	0	0	0	0	0	0	0	0	0	0	0	0	0	0	0	0	0	0	0	0	0	0	0	0	0	0	0	0	0	0
Gm8848_chr6_70368458_70369800_(-)	Gm8848	chr6	70368458	70369800	-	0	0	0	0	0	0	0	0	0	0	0	0	0	0	0	0	0	0	0	0	0	0	0	0	0	0	0	0	0	0
Igkv6-17_chr6_70371439_70371993_(+)	Igkv6-17	chr6	70371439	70371993	+	0	0	0	0	0	0	0	0	0	0	0	0	0	0	0	0	0	0	0	0	0	0	0	0	0	0	0	0	0	0
Igkv8-16_chr6_70386672_70387252_(-)	Igkv8-16	chr6	70386672	70387252	-	0	0	0	0	0	0	0	0	0	0	0	0	0	0	0	0	0	0	0	0	0	0	0	0	0	0	0	0	0	0
Gm42667_chr6_70405701_70405934_(-)	Gm42667	chr6	70405701	70405934	-	0	0	0	0	0	0	0	0	0	0	0	0	0	0	0	0	0	0	0	0	0	0	0	0	0	0	0	0	0	0
Igkv6-15_chr6_70406469_70406992_(-)	Igkv6-15	chr6	70406469	70406992	-	0	0	0	0	0	0	0	0	0	0	0	0	0	0	0	0	0	0	0	0	0	0	0	0	0	0	0	0	0	0
Gm8853_chr6_70408631_70409974_(+)	Gm8853	chr6	70408631	70409974	+	0	0	0	0	0	0	0	0	0	0	0	0	0	0	0	0	0	0	0	0	0	0	0	0	0	0	0	0	0	0
Gm10360_chr6_70424162_70424433_(+)	Gm10360	chr6	70424162	70424433	+	0	0	0	0	0	0	0	0	0	0	0	0	0	0	0	0	0	0	0	0	0	0	0	0	0	0	0	0	0	0
Gm6157_chr6_70428929_70430825_(-)	Gm6157	chr6	70428929	70430825	-	0	0	0	0	0	0	0	0	0	0	0	0	0	0	0	0	0	0	0	0	0	0	0	0	0	0	0	0	0	0
Igkv6-14_chr6_70434952_70435476_(-)	Igkv6-14	chr6	70434952	70435476	-	0	0	0	0	0	0	0	0	0	0	0	0	0	0	0	0	0	0	0	0	0	0	0	0	0	0	0	0	0	0
Gm8862_chr6_70437111_70438456_(+)	Gm8862	chr6	70437111	70438456	+	0	0	0	0	0	0	0	0	0	0	0	0	0	0	0	0	0	0	0	0	0	0	0	0	0	0	0	0	0	0
Igkv6-13_chr6_70457501_70458036_(-)	Igkv6-13	chr6	70457501	70458036	-	0	0	0	0	0	0	0	0	0	0	0	0	0	0	0	0	0	0	0	0	0	0	0	0	0	1	0	0	0	0
Gm8872_chr6_70459665_70461005_(+)	Gm8872	chr6	70459665	70461005	+	0	0	0	0	0	0	0	0	0	0	0	1	0	0	0	0	0	0	0	0	0	0	0	0	0	0	0	0	0	0
Gm42720_chr6_70493364_70493663_(-)	Gm42720	chr6	70493364	70493663	-	0	0	0	0	0	0	0	0	0	0	0	0	0	0	0	0	0	0	0	0	0	0	0	0	0	0	0	0	0	0
Gm42773_chr6_70495383_70495530_(+)	Gm42773	chr6	70495383	70495530	+	0	0	0	0	0	0	0	0	0	0	0	0	0	0	0	0	0	0	0	0	0	0	0	0	0	0	0	0	0	0
Igkv3-12-1_chr6_70497681_70498273_(-)	Igkv3-12-1	chr6	70497681	70498273	-	0	0	0	0	0	0	0	0	0	0	0	0	0	0	0	0	0	0	0	0	0	0	0	0	0	0	0	0	0	0
Igkv3-12_chr6_70518250_70518849_(+)	Igkv3-12	chr6	70518250	70518849	+	0	0	0	0	0	0	0	0	0	0	0	0	0	0	0	0	0	0	0	0	0	0	0	0	0	0	0	0	0	0
Igkv3-11_chr6_70553239_70553862_(+)	Igkv3-11	chr6	70553239	70553862	+	0	0	0	0	0	0	0	0	0	0	0	0	0	0	0	0	0	0	0	0	0	0	0	0	0	0	0	0	0	0
Igkv3-10_chr6_70572633_70573230_(+)	Igkv3-10	chr6	70572633	70573230	+	0	0	0	0	0	0	0	0	0	0	0	0	0	0	0	0	0	0	0	0	0	0	0	0	0	0	0	0	0	0
Igkv3-9_chr6_70588189_70588777_(+)	Igkv3-9	chr6	70588189	70588777	+	0	0	0	0	0	0	0	0	0	0	0	0	0	0	0	0	0	0	0	0	0	0	0	0	0	0	0	0	0	0
Igkv3-8_chr6_70588875_70589452_(+)	Igkv3-8	chr6	70588875	70589452	+	0	0	0	0	0	0	0	0	0	0	0	0	0	0	0	0	0	0	0	0	0	0	0	0	0	0	0	0	0	0
Igkv3-7_chr6_70607437_70608036_(+)	Igkv3-7	chr6	70607437	70608036	+	0	0	0	0	0	0	0	0	0	0	0	0	0	0	0	0	0	0	0	0	0	0	0	0	0	0	0	0	0	0
Igkv3-6_chr6_70642405_70642979_(+)	Igkv3-6	chr6	70642405	70642979	+	0	0	0	0	0	0	0	0	0	0	0	0	0	0	0	0	0	0	0	0	0	0	0	0	0	0	0	0	0	0
Igkv3-5_chr6_70663275_70663895_(+)	Igkv3-5	chr6	70663275	70663895	+	0	0	0	0	0	0	0	0	0	0	0	0	0	0	0	0	0	0	0	0	0	0	0	0	0	0	0	0	0	0
Igkv3-4_chr6_70671788_70672377_(+)	Igkv3-4	chr6	70671788	70672377	+	0	0	0	0	0	0	0	0	0	0	0	0	0	0	0	0	0	0	0	0	0	0	0	0	0	0	0	0	0	0
Igkv3-3_chr6_70686946_70687534_(+)	Igkv3-3	chr6	70686946	70687534	+	0	0	0	0	0	0	0	0	0	0	0	0	0	0	0	0	0	0	0	0	0	0	0	0	0	0	0	0	0	0
Igkv3-2_chr6_70698449_70699067_(+)	Igkv3-2	chr6	70698449	70699067	+	0	0	0	0	0	0	0	0	0	0	0	0	0	0	0	0	0	0	0	0	0	0	0	0	0	0	0	0	0	0
Igkv3-1_chr6_70703578_70704177_(+)	Igkv3-1	chr6	70703578	70704177	+	0	0	0	0	0	0	0	0	0	0	0	0	0	0	0	0	0	0	0	0	0	0	0	0	0	0	0	0	0	0
Gm30211_chr6_70719074_70740554_(+)	Gm30211	chr6	70719074	70740554	+	0	0	0	0	0	0	0	1	0	0	0	0	0	0	0	0	0	0	0	0	0	0	0	0	0	0	0	0	0	0
Igkj1_chr6_70722562_70722599_(+)	Igkj1	chr6	70722562	70722599	+	0	0	0	0	0	0	0	0	0	0	0	0	0	0	0	0	0	0	0	0	0	0	0	0	0	0	0	0	0	0
Igkj2_chr6_70722916_70722958_(+)	Igkj2	chr6	70722916	70722958	+	0	0	0	0	0	0	0	0	0	0	0	0	0	0	0	0	0	0	0	0	0	0	0	0	0	0	0	0	0	0
Igkj3_chr6_70723223_70723260_(+)	Igkj3	chr6	70723223	70723260	+	0	0	0	0	0	0	0	0	0	0	0	0	0	0	0	0	0	0	0	0	0	0	0	0	0	0	0	0	0	0
Igkj4_chr6_70723548_70723585_(+)	Igkj4	chr6	70723548	70723585	+	0	0	0	0	0	0	0	0	0	0	0	0	0	0	0	0	0	0	0	0	0	0	0	0	0	0	0	0	0	0
Igkj5_chr6_70723886_70723927_(+)	Igkj5	chr6	70723886	70723927	+	0	0	0	0	0	0	0	0	0	0	0	0	0	0	0	0	0	0	0	0	0	0	0	0	0	0	0	0	0	0
Igkc_chr6_70726435_70726966_(+)	Igkc	chr6	70726435	70726966	+	0	0	0	0	0	0	0	0	0	0	0	0	0	0	0	0	0	0	0	0	0	0	0	0	0	0	0	0	0	0
Rpia_chr6_70765720_70792232_(-)	Rpia	chr6	70765720	70792232	-	90	17	88	23	105	12	46	0	34	6	37	9	44	6	31	21	29	10	75	36	58	27	51	18	56	18	52	29	64	30
Eif2ak3_chr6_70844515_70905245_(+)	Eif2ak3	chr6	70844515	70905245	+	203	59	270	73	264	59	166	0	79	33	92	46	69	35	137	57	102	50	183	79	155	74	110	67	193	107	141	62	167	92
Gm23346_chr6_70855444_70855579_(+)	Gm23346	chr6	70855444	70855579	+	0	0	1	0	0	0	0	0	0	0	0	0	0	0	0	0	0	0	0	0	0	0	0	0	0	0	0	0	0	0
Gm43292_chr6_70883354_70885802_(-)	Gm43292	chr6	70883354	70885802	-	0	0	0	1	0	0	0	0	0	0	0	0	0	0	0	0	0	0	0	0	0	0	0	0	0	0	0	0	0	0
Tex37_chr6_70913087_70918927_(-)	Tex37	chr6	70913087	70918927	-	0	0	0	1	0	0	0	0	0	0	0	0	0	0	0	0	0	0	0	0	0	0	0	0	0	1	0	0	0	0
Foxi3_chr6_70956531_70961066_(+)	Foxi3	chr6	70956531	70961066	+	6	2	6	4	13	5	6	0	2	7	1	1	6	4	7	1	4	3	4	1	2	1	1	6	6	5	0	0	2	1
Gm23485_chr6_71039579_71039733_(-)	Gm23485	chr6	71039579	71039733	-	0	0	0	0	0	0	0	0	0	0	0	0	0	0	0	0	0	0	0	0	0	0	0	0	0	0	0	0	0	0
Gm43906_chr6_71105606_71106511_(-)	Gm43906	chr6	71105606	71106511	-	0	0	0	0	0	0	0	0	0	0	0	0	0	0	0	0	0	0	0	0	0	0	0	0	0	0	0	0	0	0
Rpl34-ps1_chr6_71124610_71124963_(+)	Rpl34-ps1	chr6	71124610	71124963	+	0	0	0	0	0	0	0	0	0	0	0	0	0	0	0	0	0	0	0	0	0	0	0	0	0	0	0	0	0	0
Thnsl2_chr6_71128166_71144439_(-)	Thnsl2	chr6	71128166	71144439	-	13	3	4	0	5	1	2	0	0	1	5	4	1	0	2	7	2	1	10	9	10	11	1	4	8	10	10	8	5	14
Gm44427_chr6_71164799_71166119_(+)	Gm44427	chr6	71164799	71166119	+	0	0	1	0	0	0	0	0	0	0	0	0	0	0	0	0	0	0	0	0	0	0	0	0	0	0	0	0	0	0
Fabp1_chr6_71199827_71205023_(+)	Fabp1	chr6	71199827	71205023	+	0	0	0	0	0	0	0	0	0	0	0	0	0	0	0	0	0	0	0	0	0	0	1	0	0	0	0	0	0	0
Smyd1_chr6_71213940_71322233_(-)	Smyd1	chr6	71213940	71322233	-	20	6	17	3	14	8	18	0	5	3	2	3	0	1	4	3	1	3	10	24	5	13	2	4	3	4	9	18	5	14
Mir8112_chr6_71271671_71271801_(+)	Mir8112	chr6	71271671	71271801	+	0	0	0	0	0	0	0	0	0	0	0	0	0	0	0	0	0	0	0	0	0	0	0	0	0	0	0	0	0	0
Krcc1_chr6_71271677_71285319_(+)	Krcc1	chr6	71271677	71285319	+	52	8	51	8	39	4	19	0	7	9	17	8	10	6	27	6	14	6	31	24	39	14	32	20	54	17	25	7	54	15
Gm44321_chr6_71276494_71279348_(+)	Gm44321	chr6	71276494	71279348	+	11	0	11	4	10	2	9	0	1	1	3	2	4	4	6	3	1	1	2	2	5	7	2	2	6	4	5	3	7	5
Gm1070_chr6_71293765_71302880_(+)	Gm1070	chr6	71293765	71302880	+	6	0	4	1	3	1	4	0	0	1	0	0	1	1	4	1	2	2	20	5	16	4	6	2	8	3	16	7	24	9
Cd8b1_chr6_71322788_71337494_(+)	Cd8b1	chr6	71322788	71337494	+	0	0	0	1	0	0	0	0	0	0	0	0	0	0	0	1	0	0	0	0	0	1	1	0	0	0	0	0	0	1
Gm44110_chr6_71338886_71339535_(-)	Gm44110	chr6	71338886	71339535	-	0	0	0	0	0	0	0	0	0	0	0	0	0	0	0	0	0	0	0	0	0	0	0	0	0	0	0	0	0	0
Gm44111_chr6_71349331_71349729_(+)	Gm44111	chr6	71349331	71349729	+	0	0	0	0	0	0	0	0	0	0	0	0	0	0	0	0	0	0	0	0	0	0	0	0	0	0	0	0	0	0
Gm44174_chr6_71353035_71373284_(+)	Gm44174	chr6	71353035	71373284	+	0	0	0	0	0	0	0	0	0	0	0	0	0	0	0	0	0	0	1	0	0	0	0	0	0	0	1	0	0	0
Gm44175_chr6_71354351_71360829_(-)	Gm44175	chr6	71354351	71360829	-	1	0	1	0	0	0	0	0	0	0	0	0	0	0	1	0	1	0	1	0	0	0	0	0	0	0	0	0	0	0
Cd8a_chr6_71373427_71379173_(+)	Cd8a	chr6	71373427	71379173	+	0	0	1	0	0	0	0	0	0	0	0	0	0	0	0	0	0	0	0	0	0	0	0	0	0	0	0	0	0	1
Rmnd5a_chr6_71388634_71440637_(-)	Rmnd5a	chr6	71388634	71440637	-	291	62	341	53	315	42	213	0	92	21	143	38	89	41	168	67	111	30	232	58	239	46	152	57	198	73	198	60	222	65
Gm44130_chr6_71432104_71435107_(-)	Gm44130	chr6	71432104	71435107	-	7	0	1	0	1	1	1	0	0	0	2	0	2	1	0	0	0	0	1	0	3	2	1	1	1	1	1	0	2	2
Gm44172_chr6_71451992_71458998_(+)	Gm44172	chr6	71451992	71458998	+	0	0	0	0	0	1	0	0	0	0	0	0	0	0	0	0	0	0	0	0	0	1	0	0	0	0	0	1	0	0
Gm44186_chr6_71463311_71466062_(-)	Gm44186	chr6	71463311	71466062	-	0	0	0	0	0	0	0	0	0	0	0	0	0	0	0	0	0	0	0	0	0	0	0	0	1	0	0	0	0	0
Rnf103_chr6_71493894_71510881_(+)	Rnf103	chr6	71493894	71510881	+	32	12	30	10	37	7	15	0	4	2	6	11	6	5	3	3	5	3	2	5	8	5	8	5	10	12	6	1	4	6
Gm44194_chr6_71538510_71541738_(-)	Gm44194	chr6	71538510	71541738	-	1	0	0	0	0	1	1	0	0	0	0	0	0	0	1	0	0	0	0	1	0	0	0	1	1	2	0	0	0	0
1700040L08Rik_chr6_71543192_71544114_(-)	1700040L08Rik	chr6	71543192	71544114	-	0	0	4	0	3	0	4	0	1	0	0	0	0	0	0	0	0	0	2	0	0	0	0	0	3	0	0	0	0	0
Chmp3_chr6_71543797_71582609_(+)	Chmp3	chr6	71543797	71582609	+	256	150	337	189	237	149	227	0	33	57	76	76	61	85	57	72	50	67	134	178	114	135	95	135	95	169	95	132	103	151
Kdm3a_chr6_71588972_71632990_(-)	Kdm3a	chr6	71588972	71632990	-	372	93	447	112	389	112	313	0	88	25	151	65	135	59	256	98	127	73	475	220	365	144	226	118	282	140	403	161	374	158
Gm6063_chr6_71641612_71642096_(-)	Gm6063	chr6	71641612	71642096	-	0	0	0	0	0	0	0	0	0	0	0	0	0	0	0	0	0	0	0	2	0	0	0	1	0	0	0	0	0	0
Gm44768_chr6_71672095_71672678_(-)	Gm44768	chr6	71672095	71672678	-	1	0	1	0	1	0	0	0	0	0	0	0	0	0	0	0	0	0	0	0	0	0	0	0	0	0	0	0	1	0
Rpl19-ps9_chr6_71683298_71683885_(+)	Rpl19-ps9	chr6	71683298	71683885	+	0	0	0	0	0	0	0	0	0	0	0	0	0	0	0	1	0	0	0	0	0	0	0	0	0	0	0	0	0	0
Reep1_chr6_71707561_71810710_(+)	Reep1	chr6	71707561	71810710	+	81	15	39	6	59	7	53	0	15	4	24	5	11	1	13	7	13	2	23	6	22	4	13	10	16	7	11	10	27	9
Gm44769_chr6_71790668_71793476_(+)	Gm44769	chr6	71790668	71793476	+	2	0	1	0	0	0	0	0	0	0	0	0	1	0	0	0	0	0	0	0	0	0	0	0	0	0	0	0	0	0
Gm44770_chr6_71802888_71804151_(+)	Gm44770	chr6	71802888	71804151	+	2	0	0	0	1	0	0	1	0	1	1	0	0	0	0	1	0	1	0	0	0	0	0	0	1	0	0	0	0	0
Mrpl35_chr6_71812997_71826969_(-)	Mrpl35	chr6	71812997	71826969	-	20	6	29	10	31	9	11	0	3	3	6	7	6	4	6	6	8	1	24	20	24	6	20	13	30	19	17	10	20	14
Gm44771_chr6_71831085_71831710_(-)	Gm44771	chr6	71831085	71831710	-	0	0	0	0	0	0	0	0	0	0	0	0	1	0	0	0	0	0	1	0	0	0	0	0	0	0	0	0	0	0
Immt_chr6_71831331_71877388_(+)	Immt	chr6	71831331	71877388	+	572	103	672	142	560	128	393	0	157	39	211	75	207	56	266	63	209	61	543	160	481	112	480	128	422	137	478	96	492	125
Gm17825_chr6_71869212_71870005_(-)	Gm17825	chr6	71869212	71870005	-	0	0	0	0	0	0	0	0	0	0	0	0	0	0	0	0	0	0	0	0	0	0	0	0	0	0	0	0	0	0
Ptcd3_chr6_71880638_71908750_(-)	Ptcd3	chr6	71880638	71908750	-	568	151	566	151	611	172	456	0	221	45	298	103	263	61	389	104	231	64	643	183	643	199	581	170	642	166	548	148	639	196
Gm22486_chr6_71882557_71882693_(-)	Gm22486	chr6	71882557	71882693	-	3	2	0	3	5	2	1	0	1	3	1	5	4	0	1	3	2	2	2	5	2	3	1	5	3	5	3	2	1	4
Polr1a_chr6_71909053_71984935_(+)	Polr1a	chr6	71909053	71984935	+	662	147	711	156	700	145	399	0	253	71	320	70	295	84	342	86	251	72	653	151	479	122	644	124	532	148	539	119	491	116
Gm19078_chr6_71918899_71919844_(-)	Gm19078	chr6	71918899	71919844	-	0	0	0	0	0	0	0	0	0	0	0	0	0	0	0	0	0	0	0	0	0	0	0	0	0	0	0	0	0	0
Gm26628_chr6_71961145_71963775_(-)	Gm26628	chr6	71961145	71963775	-	0	0	0	0	1	0	0	0	0	0	0	0	1	0	0	0	0	0	2	0	0	0	0	0	0	0	0	0	0	0
9130221F21Rik_chr6_72013896_72042528_(-)	9130221F21Rik	chr6	72013896	72042528	-	0	0	0	0	0	0	1	0	0	0	0	0	0	0	0	0	0	0	1	0	0	0	0	0	0	0	0	0	0	0
Gm8952_chr6_72073052_72074153_(-)	Gm8952	chr6	72073052	72074153	-	0	0	0	0	0	0	0	0	0	0	0	0	0	0	0	0	0	0	0	0	0	0	0	0	0	0	0	0	0	0
Gm44604_chr6_72087359_72087854_(-)	Gm44604	chr6	72087359	72087854	-	0	0	0	0	0	0	0	0	0	0	0	0	0	0	0	0	0	0	0	0	0	0	0	0	0	0	0	0	0	0
St3gal5_chr6_72097592_72154571_(+)	St3gal5	chr6	72097592	72154571	+	117	14	112	14	79	22	72	0	34	16	46	13	38	19	63	31	40	11	75	23	71	32	57	33	85	33	39	16	83	25
Gm29438_chr6_72104201_72106813_(+)	Gm29438	chr6	72104201	72106813	+	5	6	2	7	6	0	4	0	2	3	7	3	0	2	1	2	3	8	1	3	1	0	0	5	3	1	2	1	5	4
4933431G14Rik_chr6_72120213_72123197_(-)	4933431G14Rik	chr6	72120213	72123197	-	0	0	0	0	0	0	0	0	0	0	0	0	0	0	0	0	0	0	0	0	0	0	0	0	0	0	0	0	0	0
Gm38832_chr6_72162849_72167707_(+)	Gm38832	chr6	72162849	72167707	+	0	0	1	1	1	0	0	0	0	0	1	0	0	0	0	0	0	0	0	0	0	0	0	0	0	0	0	0	0	0
Atoh8_chr6_72206177_72235577_(-)	Atoh8	chr6	72206177	72235577	-	1	0	2	0	1	0	1	0	0	0	0	0	0	0	0	0	0	0	1	1	0	0	2	0	1	0	0	0	0	0
Sftpb_chr6_72304610_72314371_(+)	Sftpb	chr6	72304610	72314371	+	0	0	0	0	0	0	0	0	0	0	0	0	0	0	0	0	0	0	0	1	0	0	0	0	0	0	0	0	0	0
Usp39_chr6_72318678_72345184_(-)	Usp39	chr6	72318678	72345184	-	384	86	385	69	368	66	234	0	119	31	164	42	142	31	174	44	155	19	364	96	337	71	361	76	337	78	312	64	370	82
Gm45051_chr6_72347029_72348458_(-)	Gm45051	chr6	72347029	72348458	-	0	0	0	0	0	0	0	0	0	0	0	0	0	0	0	0	0	0	0	1	0	0	0	0	0	0	0	0	0	0
0610030E20Rik_chr6_72347317_72353148_(+)	0610030E20Rik	chr6	72347317	72353148	+	69	9	56	4	52	4	33	0	21	1	34	2	42	2	35	0	17	2	56	5	47	4	59	1	44	4	49	2	63	4
Tmem150a_chr6_72355447_72359762_(+)	Tmem150a	chr6	72355447	72359762	+	10	8	8	2	7	6	4	0	4	2	6	3	3	7	13	3	5	3	6	3	7	3	10	3	8	2	5	3	6	2
Rnf181_chr6_72359714_72366956_(-)	Rnf181	chr6	72359714	72366956	-	27	10	20	4	31	8	37	0	4	3	13	2	7	3	13	6	11	7	31	9	23	9	22	10	27	12	16	3	32	11
Vamp5_chr6_72368794_72380468_(-)	Vamp5	chr6	72368794	72380468	-	1	0	1	1	1	0	0	0	1	1	1	1	2	0	1	0	0	1	3	0	2	2	0	1	2	1	4	0	2	0
Vamp8_chr6_72385223_72390703_(-)	Vamp8	chr6	72385223	72390703	-	19	4	26	8	13	6	11	0	6	3	7	3	6	4	9	9	5	3	21	7	26	10	12	8	16	18	18	7	12	12
Ggcx_chr6_72414308_72430712_(+)	Ggcx	chr6	72414308	72430712	+	48	5	40	5	48	13	25	0	17	4	28	12	16	2	23	13	23	10	70	21	54	15	34	11	44	11	46	12	46	11
Mat2a_chr6_72432799_72439558_(-)	Mat2a	chr6	72432799	72439558	-	296	172	351	204	308	180	311	0	74	31	100	69	129	87	94	52	82	38	307	233	188	133	249	179	214	195	217	167	207	140
Particl_chr6_72439051_72440610_(+)	Particl	chr6	72439051	72440610	+	1	4	2	1	3	1	4	0	2	1	3	0	0	1	1	1	1	1	0	0	3	2	0	1	0	4	0	1	3	0
Sh2d6_chr6_72513641_72521707_(-)	Sh2d6	chr6	72513641	72521707	-	1	0	0	0	0	1	0	0	0	0	0	0	0	0	0	0	1	0	0	1	1	1	0	0	1	0	1	0	0	0
Capg_chr6_72544391_72562983_(+)	Capg	chr6	72544391	72562983	+	106	19	112	22	94	21	62	0	28	5	58	9	25	14	54	22	44	18	84	24	70	27	97	33	89	42	74	28	105	40
Elmod3_chr6_72565922_72598413_(-)	Elmod3	chr6	72565922	72598413	-	49	3	28	6	33	6	29	0	6	5	7	8	14	3	15	11	15	7	21	9	35	8	24	12	33	10	34	15	23	8
Retsat_chr6_72598475_72608425_(+)	Retsat	chr6	72598475	72608425	+	22	17	14	14	8	12	8	0	4	9	6	11	1	8	10	12	0	4	15	22	16	15	9	12	12	17	9	16	7	16
Gm45053_chr6_72603004_72605502_(-)	Gm45053	chr6	72603004	72605502	-	14	3	10	5	7	3	6	0	2	2	8	4	6	4	5	7	5	5	3	2	6	4	2	3	3	8	3	3	4	0
Tgoln1_chr6_72608432_72617000_(-)	Tgoln1	chr6	72608432	72617000	-	213	45	209	59	166	42	138	0	36	17	55	18	53	25	85	41	62	31	140	35	143	35	111	57	127	40	117	40	138	42
Gm20536_chr6_72609836_72616190_(+)	Gm20536	chr6	72609836	72616190	+	1	1	3	1	2	0	0	0	1	3	0	0	1	2	0	3	1	0	0	0	0	1	0	0	2	0	0	1	0	0
Tcf7l1_chr6_72626378_72789254_(-)	Tcf7l1	chr6	72626378	72789254	-	1439	475	1941	625	1944	600	1099	2	885	363	1182	552	1196	578	956	528	921	506	1558	761	766	428	1322	742	1241	732	1221	588	897	443
Gm15401_chr6_72629288_72637717_(+)	Gm15401	chr6	72629288	72637717	+	0	0	0	0	0	0	0	0	0	0	0	0	0	0	0	0	2	0	0	1	0	0	1	0	0	0	0	0	0	0
Gm37969_chr6_72635147_72638555_(-)	Gm37969	chr6	72635147	72638555	-	9	3	15	2	8	3	7	0	6	2	9	1	10	4	6	3	6	2	13	0	3	2	5	2	18	3	6	1	5	1
Gm38114_chr6_72642854_72644085_(-)	Gm38114	chr6	72642854	72644085	-	11	3	15	7	12	2	13	0	6	0	2	2	9	6	4	2	5	5	8	4	5	1	12	1	5	5	5	3	6	6
Gm38320_chr6_72652320_72653600_(+)	Gm38320	chr6	72652320	72653600	+	0	0	0	0	0	0	0	0	0	0	0	0	0	0	0	1	0	0	0	0	0	0	0	0	0	0	0	0	0	0
Gm15402_chr6_72699214_72705090_(+)	Gm15402	chr6	72699214	72705090	+	0	0	0	0	0	0	0	0	1	0	0	0	0	0	1	0	0	0	0	0	0	0	0	0	0	0	0	0	0	0
Gm37736_chr6_72749113_72751914_(-)	Gm37736	chr6	72749113	72751914	-	10	2	11	4	5	7	4	0	2	1	3	0	4	3	1	4	0	0	4	3	3	1	5	5	1	4	2	4	6	2
Kcmf1_chr6_72841114_72899979_(-)	Kcmf1	chr6	72841114	72899979	-	583	197	517	164	575	166	254	2	219	90	347	128	311	135	363	144	266	104	649	241	420	157	521	205	516	195	559	192	476	194
D530018E20Rik_chr6_72894962_72895919_(-)	D530018E20Rik	chr6	72894962	72895919	-	6	5	5	6	1	6	1	0	2	1	2	6	1	3	1	6	1	5	2	7	3	5	2	8	2	5	2	5	0	8
Gm26640_chr6_72953236_72957247_(+)	Gm26640	chr6	72953236	72957247	+	0	0	4	1	1	1	1	0	2	0	1	0	0	0	2	0	0	0	3	0	5	1	1	0	3	1	5	0	6	0
Tmsb10_chr6_72957347_72958748_(-)	Tmsb10	chr6	72957347	72958748	-	8	0	10	0	21	0	7	0	11	0	13	0	5	0	8	0	10	0	24	0	11	0	10	0	14	0	16	0	12	0
Gm18402_chr6_72982477_72983062_(-)	Gm18402	chr6	72982477	72983062	-	0	0	0	0	0	0	0	0	0	0	0	0	0	0	0	0	0	0	0	0	0	0	0	0	0	0	0	0	0	0
Gm20560_chr6_73012043_73020360_(+)	Gm20560	chr6	73012043	73020360	+	1	0	0	0	1	0	0	0	0	0	0	0	0	1	0	1	0	0	0	0	0	2	0	0	1	0	0	1	0	2
Dnah6_chr6_73017606_73221651_(-)	Dnah6	chr6	73017606	73221651	-	4	1	0	1	1	0	1	0	2	0	0	1	1	0	2	0	0	1	4	4	1	0	2	3	2	1	0	1	2	1
Gm24533_chr6_73141485_73141680_(-)	Gm24533	chr6	73141485	73141680	-	0	0	0	0	0	0	0	0	0	0	0	0	0	0	0	0	0	0	0	0	0	0	0	0	0	0	0	0	0	0
Gm40377_chr6_73223050_73225064_(+)	Gm40377	chr6	73223050	73225064	+	0	2	0	0	0	0	0	0	0	0	0	0	0	0	1	1	0	1	0	0	2	0	0	1	0	0	0	0	0	1
Suclg1_chr6_73248382_73276911_(+)	Suclg1	chr6	73248382	73276911	+	230	125	286	121	234	121	192	0	46	30	58	37	47	37	82	58	59	43	198	123	196	133	152	106	157	123	157	106	189	130
Gm44475_chr6_73310218_73310641_(-)	Gm44475	chr6	73310218	73310641	-	0	0	0	0	0	0	0	0	0	0	0	0	0	0	0	0	0	0	0	0	0	0	0	0	0	0	0	0	0	0
Gm24370_chr6_73392142_73392243_(+)	Gm24370	chr6	73392142	73392243	+	0	0	0	0	0	0	0	0	0	0	0	0	0	0	0	0	0	0	0	0	0	0	0	0	0	0	0	0	0	0
Olfr210-ps1_chr6_73420314_73421218_(-)	Olfr210-ps1	chr6	73420314	73421218	-	0	0	0	0	0	0	0	0	0	0	0	0	0	0	0	0	0	0	0	0	0	0	0	0	0	0	0	0	0	0
1700065L07Rik_chr6_73436986_73471021_(-)	1700065L07Rik	chr6	73436986	73471021	-	0	0	0	0	0	0	0	0	0	0	0	0	0	0	0	0	0	0	0	0	0	0	0	0	0	0	0	0	0	0
4931417E11Rik_chr6_73468573_73469667_(-)	4931417E11Rik	chr6	73468573	73469667	-	0	0	0	0	0	0	0	0	0	0	0	0	0	0	0	0	0	0	0	0	0	0	0	0	0	0	0	0	0	0
Gm4374_chr6_73528815_73529238_(-)	Gm4374	chr6	73528815	73529238	-	1	0	0	0	0	0	0	0	0	1	0	0	0	0	1	0	0	0	0	0	0	0	0	0	0	0	0	0	0	0
Gm31747_chr6_73586109_73608673_(-)	Gm31747	chr6	73586109	73608673	-	0	0	0	0	0	0	0	0	0	0	0	0	0	0	0	0	0	0	0	0	0	0	0	0	0	0	0	0	0	0
Gm44225_chr6_73885664_73885849_(-)	Gm44225	chr6	73885664	73885849	-	0	0	0	0	0	0	0	0	0	0	0	0	0	0	0	0	0	0	0	0	0	0	0	0	0	0	0	0	0	0
Gm26179_chr6_74340950_74341081_(+)	Gm26179	chr6	74340950	74341081	+	0	0	0	0	0	0	0	0	0	0	0	0	0	0	0	0	0	0	0	0	0	0	0	0	0	0	0	0	0	0
Gm23924_chr6_74451797_74451904_(-)	Gm23924	chr6	74451797	74451904	-	0	0	0	0	0	0	0	0	0	0	0	0	0	0	0	0	0	0	0	0	0	0	0	0	0	0	0	0	0	0
Gm22254_chr6_74505055_74505164_(-)	Gm22254	chr6	74505055	74505164	-	0	0	0	0	0	0	0	0	0	0	0	0	0	0	0	0	0	0	0	0	0	0	0	0	0	0	0	0	0	0
Gm8992_chr6_75187667_75188168_(-)	Gm8992	chr6	75187667	75188168	-	0	0	0	0	0	0	0	0	0	0	0	0	0	0	0	0	0	0	0	0	0	0	0	0	0	0	0	0	0	0
Gm8993_chr6_75201988_75202970_(+)	Gm8993	chr6	75201988	75202970	+	0	0	0	0	0	0	0	0	0	0	0	0	0	0	0	0	0	0	0	0	0	0	0	0	0	0	0	0	0	0
Gm6210_chr6_75296118_75298059_(-)	Gm6210	chr6	75296118	75298059	-	0	1	0	2	0	0	4	2	1	0	1	0	1	4	1	1	2	2	2	0	2	2	0	3	1	2	2	0	0	2
Gm8999_chr6_75383054_75384022_(-)	Gm8999	chr6	75383054	75384022	-	0	0	0	0	0	0	0	0	0	0	0	0	0	0	0	0	0	0	0	0	0	0	0	0	0	0	0	0	0	0
4933439N06Rik_chr6_75572094_75573458_(-)	4933439N06Rik	chr6	75572094	75573458	-	0	0	0	0	0	0	0	0	0	0	0	0	0	0	0	0	0	0	0	0	0	0	0	0	0	0	0	0	0	0
Gm9001_chr6_75782358_75782756_(-)	Gm9001	chr6	75782358	75782756	-	0	0	0	0	0	0	0	1	0	0	0	0	0	1	0	0	0	0	0	0	0	0	1	0	0	0	0	0	0	1
Gm44113_chr6_75968046_75974983_(-)	Gm44113	chr6	75968046	75974983	-	0	1	0	0	1	0	0	0	0	0	0	0	0	0	0	0	0	0	0	0	0	0	0	0	0	0	0	0	0	0
Gm5995_chr6_76121627_76122899_(+)	Gm5995	chr6	76121627	76122899	+	0	1	0	1	0	0	0	1	0	0	0	1	0	0	0	1	0	0	0	0	0	0	1	1	0	0	0	0	0	0
Gm44334_chr6_76181709_76181820_(+)	Gm44334	chr6	76181709	76181820	+	0	0	0	0	0	0	0	0	0	0	0	0	0	0	0	0	0	0	0	0	0	0	0	0	0	0	0	0	0	0
Gm22283_chr6_76200118_76200278_(-)	Gm22283	chr6	76200118	76200278	-	0	0	0	0	0	0	0	0	0	0	0	0	0	0	0	0	0	0	0	0	0	0	0	0	0	0	0	0	0	0
Gm44126_chr6_76284416_76284929_(+)	Gm44126	chr6	76284416	76284929	+	0	0	0	0	0	0	0	0	0	0	0	0	0	0	0	0	0	0	0	0	0	0	0	0	0	0	0	0	0	0
Gm44163_chr6_76455391_76455865_(-)	Gm44163	chr6	76455391	76455865	-	0	0	0	0	0	0	0	0	0	0	0	0	0	0	0	0	0	0	0	0	0	0	0	0	0	0	0	0	0	0
Gm9008_chr6_76495432_76497784_(-)	Gm9008	chr6	76495432	76497784	-	1	0	0	0	0	0	0	0	0	0	0	0	1	0	0	0	0	0	0	0	0	0	0	0	0	0	0	0	0	0
Gm44166_chr6_76496082_76497524_(+)	Gm44166	chr6	76496082	76497524	+	0	0	0	0	0	0	0	0	0	0	0	0	0	0	0	0	0	0	0	0	0	0	0	0	0	0	0	0	0	0
Ctnna2_chr6_76881637_77979699_(-)	Ctnna2	chr6	76881637	77979699	-	164	66	173	42	195	64	53	0	61	30	80	59	60	47	33	20	35	23	23	23	24	25	74	69	72	68	20	14	32	22
Lrrtm1_chr6_77242689_77257791_(+)	Lrrtm1	chr6	77242689	77257791	+	0	0	0	0	0	0	0	0	0	0	0	0	0	0	0	0	0	0	0	0	0	0	0	0	0	0	0	0	0	0
Gm44234_chr6_77323906_77324805_(-)	Gm44234	chr6	77323906	77324805	-	0	0	0	0	0	0	0	0	0	0	0	0	0	0	0	0	0	0	0	0	0	0	0	0	0	0	0	0	0	0
6330415B21Rik_chr6_77380260_77382459_(-)	6330415B21Rik	chr6	77380260	77382459	-	0	0	0	0	1	0	0	0	0	0	0	0	0	0	1	0	0	0	0	0	0	0	0	0	0	0	0	0	0	0
Gm44435_chr6_77412300_77416418_(-)	Gm44435	chr6	77412300	77416418	-	0	0	0	0	0	1	0	0	0	0	0	0	0	1	0	0	0	0	0	0	0	0	0	0	0	0	0	0	0	0
Gm44433_chr6_77428678_77433509_(-)	Gm44433	chr6	77428678	77433509	-	0	0	3	0	1	0	2	0	0	0	0	0	0	0	1	0	0	0	0	0	1	0	0	1	0	0	1	0	0	0
Gm44235_chr6_77471138_77474195_(-)	Gm44235	chr6	77471138	77474195	-	0	0	0	0	1	0	0	0	0	0	0	1	1	1	0	2	0	0	0	0	0	0	0	0	0	0	0	0	0	0
Gm44438_chr6_77539847_77543082_(-)	Gm44438	chr6	77539847	77543082	-	2	0	0	0	1	0	0	0	1	0	0	1	1	0	0	0	0	0	0	0	0	0	0	0	0	0	0	0	0	0
Gm44286_chr6_77586995_77588481_(-)	Gm44286	chr6	77586995	77588481	-	0	0	0	1	0	0	0	0	0	0	0	0	0	0	0	0	0	0	0	0	1	0	0	0	0	1	0	0	0	0
Gm44288_chr6_77692979_77695773_(-)	Gm44288	chr6	77692979	77695773	-	0	1	0	0	0	0	0	0	0	0	0	0	1	0	0	0	0	0	0	0	0	0	0	2	0	1	0	1	0	0
Gm44437_chr6_77745745_77749782_(-)	Gm44437	chr6	77745745	77749782	-	1	1	0	1	0	2	0	0	0	0	0	0	0	0	0	0	0	0	0	0	0	0	0	0	0	0	0	0	0	0
Gm44255_chr6_77984516_77986568_(+)	Gm44255	chr6	77984516	77986568	+	0	0	0	0	0	0	0	0	0	0	0	0	0	0	0	0	0	0	0	0	0	0	0	0	0	0	0	0	0	0
Gm21045_chr6_78068568_78069587_(-)	Gm21045	chr6	78068568	78069587	-	0	0	0	0	0	0	0	0	0	0	0	0	0	0	0	0	0	0	0	0	0	0	0	0	0	0	0	0	0	0
Gm5576_chr6_78215878_78217113_(+)	Gm5576	chr6	78215878	78217113	+	1	0	1	0	1	0	0	0	0	0	2	0	0	0	0	0	0	0	1	0	2	2	0	1	2	1	6	1	3	0
Reg3b_chr6_78370657_78373466_(+)	Reg3b	chr6	78370657	78373466	+	0	0	2	0	0	0	0	0	0	0	0	0	0	0	0	0	0	0	0	0	0	0	0	0	0	0	0	0	0	0
Reg3d_chr6_78375874_78378865_(-)	Reg3d	chr6	78375874	78378865	-	0	0	0	0	0	0	0	0	0	0	0	0	0	0	0	0	0	0	0	0	0	0	0	0	0	0	0	0	0	0
Reg3a_chr6_78380709_78383827_(+)	Reg3a	chr6	78380709	78383827	+	0	0	0	0	0	0	0	0	0	0	0	0	0	0	0	0	0	0	0	0	0	0	0	0	0	0	0	0	0	0
Reg2_chr6_78395623_78408106_(+)	Reg2	chr6	78395623	78408106	+	2	0	1	0	1	0	3	0	0	0	1	0	0	0	0	0	1	0	1	0	0	0	1	0	0	0	0	0	1	0
Reg1_chr6_78422711_78428667_(+)	Reg1	chr6	78422711	78428667	+	1	0	0	0	2	0	0	0	0	0	0	0	0	0	0	0	0	0	0	0	0	0	0	0	0	0	0	0	0	0
Reg3g_chr6_78466269_78468872_(-)	Reg3g	chr6	78466269	78468872	-	0	0	0	0	0	0	0	0	0	0	0	0	0	0	0	0	0	0	0	0	0	1	0	0	0	0	0	0	0	0
Gm21392_chr6_78482693_78483664_(+)	Gm21392	chr6	78482693	78483664	+	0	0	0	0	0	0	0	0	0	0	0	0	0	0	0	0	0	0	0	0	0	0	0	0	0	0	0	0	0	0
Gm6072_chr6_78496946_78497441_(-)	Gm6072	chr6	78496946	78497441	-	0	0	0	0	0	0	0	0	0	0	0	0	0	0	0	0	0	0	0	0	0	0	0	0	0	0	0	0	0	0
Gm23727_chr6_78911167_78911330_(+)	Gm23727	chr6	78911167	78911330	+	0	0	0	0	0	0	0	0	0	0	0	0	0	0	0	0	0	0	0	0	0	0	0	0	0	0	0	0	0	0
Gm29005_chr6_78912605_78912924_(-)	Gm29005	chr6	78912605	78912924	-	0	0	0	0	0	0	0	0	0	0	0	0	0	0	0	0	0	0	0	0	0	0	0	0	0	0	0	0	0	0
Gm20362_chr6_79032044_79035869_(+)	Gm20362	chr6	79032044	79035869	+	2	0	2	7	1	7	1	5	3	2	1	4	0	3	9	10	1	4	3	4	3	3	1	10	3	12	3	3	1	5
Gm5311_chr6_79048116_79048824_(+)	Gm5311	chr6	79048116	79048824	+	1	0	0	0	0	0	0	0	0	0	0	0	0	0	0	0	0	0	0	0	0	0	0	0	1	0	0	0	1	0
Gm6261_chr6_79541208_79541967_(+)	Gm6261	chr6	79541208	79541967	+	1	0	0	0	1	0	0	0	1	0	0	0	0	0	0	0	0	0	0	0	0	0	0	0	0	0	0	0	0	0
Gm44271_chr6_79688845_79710914_(+)	Gm44271	chr6	79688845	79710914	+	0	0	0	0	0	0	0	0	0	0	0	0	0	0	0	0	0	0	0	0	0	0	0	0	0	0	0	0	0	0
Gm20594_chr6_79817916_79818364_(+)	Gm20594	chr6	79817916	79818364	+	0	0	0	1	0	0	0	0	0	0	0	1	0	1	0	1	0	0	0	150	0	252	0	72	0	90	0	108	0	110
Gm4409_chr6_79926414_80023156_(-)	Gm4409	chr6	79926414	80023156	-	0	0	0	0	0	0	0	0	0	0	0	0	0	0	0	0	0	0	0	0	0	0	0	0	0	0	0	0	0	0
Lrrtm4_chr6_80018877_80810143_(+)	Lrrtm4	chr6	80018877	80810143	+	0	0	1	0	0	0	0	0	0	0	1	1	0	1	1	0	0	0	1	2	1	3	1	0	0	1	1	1	0	0
Gm44240_chr6_80048676_80051329_(+)	Gm44240	chr6	80048676	80051329	+	0	0	0	0	0	0	0	0	0	0	0	0	0	0	0	0	0	0	0	0	0	0	0	0	0	0	0	0	0	0
Gm44228_chr6_80217451_80219476_(+)	Gm44228	chr6	80217451	80219476	+	0	0	0	0	0	0	0	0	0	0	0	0	0	0	0	0	0	0	0	0	0	0	0	0	0	0	0	0	0	0
Gm44230_chr6_80268496_80272045_(+)	Gm44230	chr6	80268496	80272045	+	0	0	0	0	0	0	0	0	0	0	0	0	0	0	0	0	0	0	0	0	0	0	0	0	0	0	0	0	0	0
Gm20371_chr6_80302613_80304368_(+)	Gm20371	chr6	80302613	80304368	+	0	0	0	0	0	0	0	0	0	0	0	0	0	0	0	0	0	0	0	0	0	0	0	0	0	0	0	0	0	0
Gm44241_chr6_80319192_80320853_(+)	Gm44241	chr6	80319192	80320853	+	0	0	0	0	0	0	0	0	0	0	0	0	0	0	0	0	0	0	0	0	0	0	0	0	0	0	0	0	0	0
Gm44229_chr6_80445350_80447836_(+)	Gm44229	chr6	80445350	80447836	+	0	0	0	0	0	0	0	0	0	0	0	0	0	0	0	0	0	0	0	0	0	0	0	0	0	0	0	0	0	0
Gm44242_chr6_80514594_80517314_(+)	Gm44242	chr6	80514594	80517314	+	0	0	0	0	0	0	0	0	0	0	0	0	0	0	0	0	0	0	0	0	0	0	0	0	0	0	0	0	0	0
Gm44231_chr6_80655029_80659103_(+)	Gm44231	chr6	80655029	80659103	+	0	0	0	0	0	0	0	0	0	0	0	0	0	0	0	0	0	0	0	0	0	0	0	0	0	0	0	0	0	0
Gm43900_chr6_80827138_80829806_(+)	Gm43900	chr6	80827138	80829806	+	0	0	0	0	0	0	0	0	0	0	0	0	0	0	0	0	0	0	0	0	0	0	0	0	0	0	0	0	0	0
Gm43901_chr6_81420806_81421258_(-)	Gm43901	chr6	81420806	81421258	-	0	0	0	0	0	0	0	0	0	0	0	0	0	0	0	0	0	0	0	0	0	0	0	0	0	0	0	0	0	0
Gm26264_chr6_81638311_81638469_(+)	Gm26264	chr6	81638311	81638469	+	0	0	0	0	0	0	0	0	0	0	0	0	0	0	0	0	0	0	0	0	0	0	0	0	0	0	0	0	0	0
Gm38839_chr6_81675946_81715232_(-)	Gm38839	chr6	81675946	81715232	-	0	0	0	0	1	0	0	0	0	0	0	0	0	0	0	1	0	0	0	0	1	0	0	0	0	0	0	0	0	0
Gm22530_chr6_81806791_81806908_(+)	Gm22530	chr6	81806791	81806908	+	0	0	0	0	0	0	0	0	0	0	0	0	0	0	0	0	0	0	0	0	0	0	0	0	0	0	0	0	0	0
Gm4874_chr6_81840674_81841364_(-)	Gm4874	chr6	81840674	81841364	-	0	0	0	0	0	0	0	0	0	0	1	0	0	0	1	0	0	0	0	0	0	0	0	0	0	0	0	0	0	0
Gm38840_chr6_81864244_81875864_(-)	Gm38840	chr6	81864244	81875864	-	0	1	0	0	0	0	0	0	0	1	0	0	0	0	0	0	0	0	0	1	0	0	0	0	0	0	0	0	0	0
1700097M23Rik_chr6_81893818_81895339_(-)	1700097M23Rik	chr6	81893818	81895339	-	0	0	0	0	0	0	0	0	0	0	0	0	0	0	0	0	0	0	0	0	0	0	0	0	0	0	0	0	0	0
Mir7232_chr6_81895590_81895663_(-)	Mir7232	chr6	81895590	81895663	-	0	0	0	0	0	0	0	0	0	0	0	0	0	0	0	0	0	0	0	0	0	0	0	0	0	0	0	0	0	0
Mir468_chr6_81896599_81896676_(-)	Mir468	chr6	81896599	81896676	-	0	1	0	0	0	0	0	0	0	0	0	0	0	0	0	0	0	0	0	0	0	0	0	0	0	0	0	0	0	0
1700009C05Rik_chr6_81900464_81910800_(-)	1700009C05Rik	chr6	81900464	81910800	-	0	0	0	0	1	0	0	0	0	0	0	0	0	0	0	0	0	0	0	0	0	0	0	0	0	0	0	0	0	0
Gcfc2_chr6_81923669_81959915_(+)	Gcfc2	chr6	81923669	81959915	+	335	74	284	57	259	41	175	0	69	29	127	30	86	35	145	53	89	26	147	54	147	37	135	45	152	60	146	46	190	63
Mrpl19_chr6_81957851_81965958_(-)	Mrpl19	chr6	81957851	81965958	-	272	18	296	23	266	19	193	0	46	5	67	4	66	8	92	13	81	6	272	12	220	23	192	17	184	25	234	14	229	21
Gm20383_chr6_81984321_81992413_(+)	Gm20383	chr6	81984321	81992413	+	1	0	0	0	0	0	0	0	0	0	0	1	0	0	0	0	0	0	3	2	2	0	0	1	0	2	0	1	0	1
Gm44202_chr6_81985748_81986743_(-)	Gm44202	chr6	81985748	81986743	-	0	0	0	0	0	0	0	0	0	0	0	0	0	0	0	0	0	0	0	0	0	0	0	0	0	0	0	0	0	0
Eva1a_chr6_82041043_82093099_(+)	Eva1a	chr6	82041043	82093099	+	35	22	38	11	26	5	21	0	14	6	22	12	10	7	17	18	19	13	35	25	28	18	19	11	32	16	27	15	31	16
Gm15864_chr6_82050453_82052581_(-)	Gm15864	chr6	82050453	82052581	-	0	0	0	0	0	0	0	0	1	0	0	0	0	0	0	0	0	0	0	0	0	0	0	0	0	0	0	0	0	0
Gm31861_chr6_82242174_82242845_(+)	Gm31861	chr6	82242174	82242845	+	0	0	0	0	0	0	0	0	0	0	0	0	0	0	0	0	0	0	0	0	0	0	0	0	0	0	0	0	0	0
Gm44209_chr6_82318831_82322983_(-)	Gm44209	chr6	82318831	82322983	-	0	0	0	0	0	0	0	0	0	0	0	0	0	0	0	0	0	0	0	0	0	0	0	0	0	0	0	0	0	0
Tacr1_chr6_82402334_82560104_(+)	Tacr1	chr6	82402334	82560104	+	0	2	4	0	7	1	1	0	1	2	0	1	2	2	3	0	0	1	1	1	0	1	1	0	3	3	2	1	0	2
Pole4_chr6_82618992_82705365_(-)	Pole4	chr6	82618992	82705365	-	418	99	383	104	344	84	446	1	101	62	245	97	174	91	338	175	197	114	502	237	477	217	239	157	359	172	496	231	497	203
Gm44145_chr6_82680132_82694822_(+)	Gm44145	chr6	82680132	82694822	+	0	0	3	0	0	0	3	0	0	3	0	0	0	1	1	1	1	0	1	0	0	0	0	2	1	0	0	0	0	0
Hk2_chr6_82725025_82774454_(-)	Hk2	chr6	82725025	82774454	-	1570	596	1547	562	1466	541	1247	2	318	184	663	323	315	221	721	424	525	346	1186	730	1258	717	576	488	751	526	1069	609	1267	732
Gm17034_chr6_82764282_82767288_(+)	Gm17034	chr6	82764282	82767288	+	0	0	0	0	0	0	0	0	0	0	0	0	0	0	0	0	0	0	0	0	0	0	0	0	1	0	0	0	0	0
Gm38843_chr6_82803769_82805083_(-)	Gm38843	chr6	82803769	82805083	-	0	0	0	0	0	0	0	0	0	0	0	0	1	0	0	0	0	0	0	0	0	0	0	0	0	0	0	0	0	0
Gm32591_chr6_82823214_82841371_(+)	Gm32591	chr6	82823214	82841371	+	0	0	1	0	0	0	1	0	0	0	2	0	2	0	0	0	0	0	0	0	1	0	0	0	0	0	0	1	0	0
2310069B03Rik_chr6_82877864_82881853_(-)	2310069B03Rik	chr6	82877864	82881853	-	1	0	0	0	0	0	0	0	0	0	0	0	0	0	0	0	0	0	0	0	0	1	0	0	1	0	1	0	0	0
Gm6312_chr6_82887516_82888709_(-)	Gm6312	chr6	82887516	82888709	-	0	0	0	0	0	0	0	0	0	0	0	0	0	0	0	0	0	0	0	0	0	0	0	0	0	0	0	0	0	0
Gm45145_chr6_82896867_82905214_(-)	Gm45145	chr6	82896867	82905214	-	0	0	0	0	0	0	0	0	0	0	0	0	0	0	0	0	0	0	0	0	0	0	0	0	0	0	0	0	0	0
Sema4f_chr6_82911885_82939769_(-)	Sema4f	chr6	82911885	82939769	-	23	1	15	1	11	1	14	0	2	0	10	3	3	2	12	0	4	4	6	3	15	2	6	0	14	3	5	2	13	2
M1ap_chr6_82946902_83030309_(+)	M1ap	chr6	82946902	83030309	+	24	2	12	2	11	8	16	0	3	0	10	5	4	1	15	10	10	1	18	7	20	6	9	9	21	8	21	6	22	4
Gm19287_chr6_82952780_82953137_(+)	Gm19287	chr6	82952780	82953137	+	0	1	0	0	0	0	0	0	0	0	0	0	0	0	0	0	0	0	0	0	0	0	0	0	0	1	0	0	0	0
Gm43985_chr6_82990823_82991579_(-)	Gm43985	chr6	82990823	82991579	-	0	0	0	0	0	0	0	0	0	0	0	0	0	0	0	0	0	0	0	0	0	0	0	0	0	0	0	0	0	0
Gm43981_chr6_82991645_82993111_(+)	Gm43981	chr6	82991645	82993111	+	1	0	0	0	0	0	0	0	0	0	1	0	0	0	0	0	0	0	0	0	0	0	1	0	0	0	0	0	0	0
Dok1_chr6_83030934_83033471_(-)	Dok1	chr6	83030934	83033471	-	7	2	5	1	6	1	5	0	1	0	2	1	2	2	0	1	0	3	4	2	1	0	1	0	6	1	1	1	2	1
Loxl3_chr6_83034173_83052562_(+)	Loxl3	chr6	83034173	83052562	+	8	1	5	1	5	1	2	0	1	0	2	0	1	0	0	0	1	0	3	0	2	0	0	0	2	1	0	0	1	1
Mir7040_chr6_83049711_83049773_(+)	Mir7040	chr6	83049711	83049773	+	0	0	0	0	0	0	0	0	0	0	0	0	0	0	0	0	0	0	0	0	0	0	0	0	0	0	0	0	0	0
Htra2_chr6_83051266_83055273_(-)	Htra2	chr6	83051266	83055273	-	118	2	98	2	104	1	45	0	37	0	37	1	37	0	30	0	24	1	129	2	120	3	77	3	73	2	70	1	109	1
Aup1_chr6_83054521_83057808_(+)	Aup1	chr6	83054521	83057808	+	23	2	42	1	27	3	15	0	11	0	15	2	17	5	21	2	11	1	38	5	31	3	24	5	27	5	35	3	32	3
Dqx1_chr6_83057844_83067318_(+)	Dqx1	chr6	83057844	83067318	+	4	1	3	1	4	1	2	0	0	3	1	1	0	1	2	0	5	0	7	1	1	3	1	1	2	4	1	0	4	2
Tlx2_chr6_83068324_83070293_(-)	Tlx2	chr6	83068324	83070293	-	0	0	0	0	0	0	0	0	0	0	0	0	0	0	0	0	0	0	0	0	0	0	0	0	0	0	0	0	0	0
Gm37092_chr6_83074599_83076116_(-)	Gm37092	chr6	83074599	83076116	-	0	0	0	0	0	0	0	0	0	0	0	0	0	0	0	0	0	0	0	0	0	0	0	0	0	0	0	0	0	0
Pcgf1_chr6_83077869_83080855_(+)	Pcgf1	chr6	83077869	83080855	+	1	0	1	0	2	1	0	0	0	0	0	1	0	0	1	0	0	0	0	2	4	0	1	1	0	3	3	2	1	0
Lbx2_chr6_83086367_83088243_(+)	Lbx2	chr6	83086367	83088243	+	0	0	0	0	0	0	0	0	0	0	0	0	0	0	0	0	0	0	0	0	0	0	0	0	0	0	0	0	0	0
Mir3470a_chr6_83090311_83090387_(-)	Mir3470a	chr6	83090311	83090387	-	0	0	0	0	0	0	0	0	0	0	0	0	0	0	0	0	0	0	0	0	0	0	0	0	0	0	0	0	0	0
Ccdc142_chr6_83101601_83108394_(+)	Ccdc142	chr6	83101601	83108394	+	2	0	2	0	1	0	0	0	0	0	0	0	1	3	2	1	0	1	4	2	2	0	2	2	5	2	3	0	6	1
Gm42688_chr6_83101617_83109939_(+)	Gm42688	chr6	83101617	83109939	+	59	5	57	6	43	5	26	0	9	4	6	1	6	2	10	2	14	1	33	5	21	8	30	10	30	7	19	7	40	3
Ccdc142os_chr6_83106608_83109054_(-)	Ccdc142os	chr6	83106608	83109054	-	0	0	0	1	2	0	3	0	0	0	0	0	0	0	0	0	0	0	0	1	0	0	0	0	0	1	0	0	3	0
Mrpl53_chr6_83109040_83109939_(+)	Mrpl53	chr6	83109040	83109939	+	0	0	0	0	0	0	0	0	0	0	0	0	0	0	0	0	0	0	0	0	0	0	0	0	0	0	0	0	0	0
Mogs_chr6_83115496_83118898_(+)	Mogs	chr6	83115496	83118898	+	40	24	38	25	39	16	30	0	9	8	14	8	11	4	12	9	15	7	17	12	26	12	21	16	15	10	13	12	22	17
Wbp1_chr6_83119044_83121559_(-)	Wbp1	chr6	83119044	83121559	-	8	4	7	4	7	2	2	0	3	0	2	3	2	0	6	3	3	1	8	5	11	6	3	3	8	8	6	4	12	6
Ino80b_chr6_83121765_83125431_(-)	Ino80b	chr6	83121765	83125431	-	11	2	14	1	10	2	7	0	8	2	4	1	1	2	6	0	4	1	16	2	22	3	19	4	17	0	17	4	12	3
Gm44287_chr6_83122520_83124397_(+)	Gm44287	chr6	83122520	83124397	+	0	0	1	1	0	0	3	0	0	0	0	0	0	0	0	0	0	0	2	1	3	0	2	0	7	2	3	0	0	0
Rtkn_chr6_83135463_83152579_(+)	Rtkn	chr6	83135463	83152579	+	25	11	30	13	37	13	15	0	9	5	6	12	9	6	11	7	9	14	14	9	11	7	16	8	9	8	5	8	5	8
Wdr54_chr6_83149361_83156397_(-)	Wdr54	chr6	83149361	83156397	-	4	1	2	1	5	1	4	0	3	0	3	1	1	3	4	1	2	1	4	3	4	1	15	3	4	1	3	2	6	3
1700003E16Rik_chr6_83156404_83162945_(+)	1700003E16Rik	chr6	83156404	83162945	+	0	0	0	0	0	0	0	0	0	0	0	0	0	0	0	0	0	0	0	0	0	0	0	0	0	0	1	0	1	0
Dctn1_chr6_83165920_83200117_(+)	Dctn1	chr6	83165920	83200117	+	191	59	174	57	187	44	153	0	64	25	67	30	61	30	99	25	71	26	131	56	119	45	84	68	119	67	101	45	122	58
Gm15624_chr6_83166152_83172755_(-)	Gm15624	chr6	83166152	83172755	-	0	0	0	0	0	0	0	0	0	0	0	0	0	0	1	0	0	0	0	0	0	0	1	0	0	0	0	0	0	0
Slc4a5_chr6_83219828_83304945_(+)	Slc4a5	chr6	83219828	83304945	+	89	11	36	1	31	5	47	0	12	7	20	2	20	7	32	4	14	4	112	8	107	19	40	8	60	14	111	16	93	13
Mthfd2_chr6_83305691_83325908_(-)	Mthfd2	chr6	83305691	83325908	-	703	6	527	10	424	5	303	0	190	8	230	3	196	2	239	5	205	6	585	7	646	7	582	5	547	14	508	8	704	9
Gm43890_chr6_83314145_83316943_(-)	Gm43890	chr6	83314145	83316943	-	8	4	6	2	5	1	5	0	1	3	3	3	3	2	2	6	3	4	4	10	6	6	7	8	13	4	2	3	6	2
Mob1a_chr6_83326016_83343776_(+)	Mob1a	chr6	83326016	83343776	+	342	174	329	181	274	158	268	0	54	71	74	84	61	89	70	91	44	58	206	204	205	185	121	185	148	198	171	171	215	201
Bola3_chr6_83349147_83360136_(+)	Bola3	chr6	83349147	83360136	+	44	46	26	40	34	17	34	0	10	10	3	14	6	12	15	19	11	14	11	26	17	30	10	35	22	31	16	23	19	31
Tet3_chr6_83362373_83459084_(-)	Tet3	chr6	83362373	83459084	-	152	119	119	78	121	77	42	0	33	38	46	47	16	43	21	41	15	35	33	52	36	21	22	95	32	67	28	45	27	45
Mir6374_chr6_83400996_83401102_(-)	Mir6374	chr6	83400996	83401102	-	0	0	0	0	0	0	0	0	0	0	0	0	0	0	0	0	0	0	0	0	0	0	0	0	0	0	0	0	0	0
5430434F05Rik_chr6_83417440_83420992_(-)	5430434F05Rik	chr6	83417440	83420992	-	3	5	7	2	5	6	1	0	2	0	0	2	3	2	1	2	0	1	1	0	0	1	1	1	1	4	0	3	0	2
B230319C09Rik_chr6_83441755_83448322_(+)	B230319C09Rik	chr6	83441755	83448322	+	1	0	0	0	0	0	0	0	0	0	0	1	0	0	0	0	0	0	0	0	0	1	0	0	0	0	0	0	0	0
Dguok_chr6_83480217_83506969_(-)	Dguok	chr6	83480217	83506969	-	80	17	70	11	80	14	55	0	12	8	29	11	18	8	49	14	26	9	50	25	64	23	53	32	53	27	47	13	57	28
Actg2_chr6_83512905_83536265_(-)	Actg2	chr6	83512905	83536265	-	0	0	0	0	3	0	0	0	0	0	0	1	0	0	0	0	0	0	0	0	0	0	0	0	0	0	0	0	1	0
Stambp_chr6_83543211_83572729_(-)	Stambp	chr6	83543211	83572729	-	23	7	28	10	33	2	13	0	9	4	19	5	3	3	10	9	8	8	15	12	6	8	13	3	16	8	14	5	16	18
Gm18537_chr6_83548859_83550381_(-)	Gm18537	chr6	83548859	83550381	-	0	0	0	0	0	0	0	0	0	0	0	0	0	0	0	0	0	0	0	0	0	0	0	0	0	0	0	0	0	0
Gm21284_chr6_83568039_83588123_(+)	Gm21284	chr6	83568039	83588123	+	8	1	4	3	5	1	2	0	1	0	4	0	0	0	1	2	2	0	2	1	1	2	1	1	8	1	1	1	3	0
Gm24990_chr6_83591821_83592143_(-)	Gm24990	chr6	83591821	83592143	-	0	0	0	0	0	0	0	0	0	0	0	0	0	0	0	0	0	0	0	0	0	0	0	0	0	0	0	0	0	0
Gm7424_chr6_83600807_83601708_(-)	Gm7424	chr6	83600807	83601708	-	0	0	1	1	1	0	0	0	0	0	0	0	0	0	0	0	0	0	0	0	0	1	0	0	1	0	1	0	0	1
Clec4f_chr6_83644542_83656187_(-)	Clec4f	chr6	83644542	83656187	-	0	0	0	0	0	0	0	0	0	0	0	0	1	0	0	0	0	0	0	0	0	0	0	0	0	0	0	1	0	1
Cd207_chr6_83671215_83677857_(-)	Cd207	chr6	83671215	83677857	-	1	0	0	1	0	0	0	0	0	0	0	2	1	0	0	2	1	1	1	1	1	3	2	0	8	6	1	4	4	4
Vax2os_chr6_83692806_83712201_(-)	Vax2os	chr6	83692806	83712201	-	3	1	2	1	3	1	6	0	1	3	2	2	2	0	9	5	5	7	15	6	21	2	4	1	8	6	16	5	14	5
Gm27772_chr6_83702491_83702677_(+)	Gm27772	chr6	83702491	83702677	+	0	0	0	0	0	0	0	0	0	0	0	0	0	0	0	0	0	0	0	0	0	0	0	0	0	0	0	0	0	0
Gm27631_chr6_83703518_83703983_(+)	Gm27631	chr6	83703518	83703983	+	0	0	0	0	0	0	0	0	0	0	0	0	0	0	0	0	0	0	0	0	0	0	0	0	0	0	0	0	0	0
Gm27893_chr6_83710739_83710932_(+)	Gm27893	chr6	83710739	83710932	+	0	0	0	0	0	0	0	0	0	0	0	0	0	0	0	0	0	0	0	0	0	0	0	0	0	0	0	0	0	0
Vax2_chr6_83711264_83738313_(+)	Vax2	chr6	83711264	83738313	+	1	0	4	4	1	2	2	0	7	0	2	2	0	5	5	12	1	4	4	8	6	11	2	1	1	11	2	9	8	6
Gm25054_chr6_83721296_83721392_(+)	Gm25054	chr6	83721296	83721392	+	0	0	0	0	0	0	0	0	0	0	0	0	0	0	0	0	0	0	0	0	0	0	0	0	0	0	0	0	0	0
Atp6v1b1_chr6_83742990_83758855_(+)	Atp6v1b1	chr6	83742990	83758855	+	0	0	0	0	0	0	1	0	0	0	0	0	0	0	1	0	0	0	0	0	0	0	0	0	0	0	1	0	0	0
1700124L16Rik_chr6_83761756_83762865_(-)	1700124L16Rik	chr6	83761756	83762865	-	1	2	0	0	0	0	0	0	0	0	0	1	0	1	1	0	1	1	0	0	0	0	0	0	0	1	0	0	0	0
Ankrd53_chr6_83762644_83768326_(+)	Ankrd53	chr6	83762644	83768326	+	1	0	0	1	0	0	0	0	0	0	0	0	0	0	0	0	0	1	1	0	0	1	0	0	0	1	1	0	0	0
Tex261_chr6_83768885_83775813_(-)	Tex261	chr6	83768885	83775813	-	79	23	79	25	80	18	47	0	22	9	29	24	30	10	37	13	20	16	54	34	72	27	61	26	54	26	55	15	50	29
Gm7443_chr6_83792602_83792979_(-)	Gm7443	chr6	83792602	83792979	-	0	0	0	0	0	0	0	0	0	0	0	0	0	0	0	0	0	0	0	0	0	0	0	0	0	0	0	0	0	0
Nagk_chr6_83794982_83804018_(+)	Nagk	chr6	83794982	83804018	+	8	5	2	1	4	6	4	0	1	4	5	1	2	1	2	5	3	1	9	6	21	7	13	5	8	4	7	2	14	6
Paip2b_chr6_83805401_83831741_(-)	Paip2b	chr6	83805401	83831741	-	153	55	182	49	146	56	120	0	43	17	42	24	40	23	68	28	49	14	114	54	93	54	96	60	99	61	99	63	93	58
Gm23014_chr6_83836937_83837066_(-)	Gm23014	chr6	83836937	83837066	-	0	0	0	0	0	0	0	0	0	0	0	0	0	0	0	0	0	0	0	0	0	0	0	0	0	0	0	0	0	0
Gm5312_chr6_83841682_83842228_(+)	Gm5312	chr6	83841682	83842228	+	0	0	1	0	0	0	0	0	0	0	0	1	0	0	0	0	0	1	0	1	0	1	0	0	1	0	0	0	0	0
Gm6342_chr6_83844330_83845095_(-)	Gm6342	chr6	83844330	83845095	-	0	0	0	0	0	1	0	0	0	0	0	0	0	0	0	0	0	0	0	0	1	0	0	0	0	0	0	0	0	0
Zfp638_chr6_83867109_83989550_(+)	Zfp638	chr6	83867109	83989550	+	309	81	323	90	322	93	216	0	117	44	220	83	173	80	281	135	159	81	386	197	400	165	326	163	362	209	341	152	406	190
Gm44750_chr6_83870065_83872287_(+)	Gm44750	chr6	83870065	83872287	+	1	0	0	1	0	0	1	0	0	0	1	0	0	2	1	0	0	0	1	1	0	1	0	1	0	3	0	0	0	2
Gm5138_chr6_83874379_83875380_(-)	Gm5138	chr6	83874379	83875380	-	0	0	0	0	0	0	0	0	0	0	0	0	0	0	0	0	0	0	0	0	0	0	0	0	0	0	0	0	0	0
Gm43919_chr6_83896959_83897322_(+)	Gm43919	chr6	83896959	83897322	+	0	0	0	0	0	0	0	0	1	1	0	0	0	0	2	2	1	1	0	0	0	1	0	3	0	3	1	0	0	1
Gm43920_chr6_83962277_83965048_(+)	Gm43920	chr6	83962277	83965048	+	4	0	2	0	2	0	2	0	0	1	2	2	2	0	5	0	4	3	4	1	6	5	4	2	4	0	7	2	9	2
Dysf_chr6_84008590_84211060_(+)	Dysf	chr6	84008590	84211060	+	289	140	219	113	251	113	114	1	110	93	147	103	122	104	205	159	132	92	186	187	167	150	195	151	191	167	177	141	184	153
Gm33024_chr6_84008898_84012121_(-)	Gm33024	chr6	84008898	84012121	-	0	0	0	0	0	0	0	0	0	0	0	0	1	0	0	1	0	0	0	0	0	0	0	0	0	0	0	0	1	1
Gm7498_chr6_84031588_84032671_(+)	Gm7498	chr6	84031588	84032671	+	1	1	2	0	1	0	0	0	0	0	0	0	1	0	0	0	1	0	0	0	0	0	1	1	2	0	1	0	1	0
Gm15475_chr6_84093772_84107007_(-)	Gm15475	chr6	84093772	84107007	-	0	0	0	0	0	0	0	0	2	0	0	0	0	0	0	0	0	0	0	0	0	0	0	0	0	0	0	0	0	0
Gm44127_chr6_84225252_84286603_(+)	Gm44127	chr6	84225252	84286603	+	0	1	1	0	0	0	0	0	0	0	0	0	0	0	1	0	0	0	1	0	0	0	0	1	0	0	1	0	2	0
Gm10445_chr6_84412942_84423838_(-)	Gm10445	chr6	84412942	84423838	-	0	0	0	0	0	0	0	0	0	0	0	0	0	0	0	0	0	0	0	0	0	0	0	0	0	0	0	0	0	0
4930504D19Rik_chr6_84535876_84536321_(+)	4930504D19Rik	chr6	84535876	84536321	+	0	0	0	0	0	0	0	0	0	0	0	0	0	0	0	0	0	0	0	0	0	0	0	0	0	0	0	0	0	0
Cyp26b1_chr6_84571414_84593908_(-)	Cyp26b1	chr6	84571414	84593908	-	0	0	0	0	0	0	0	0	0	0	0	0	0	0	0	0	0	0	0	0	0	0	0	0	0	0	0	0	0	0
Exoc6b_chr6_84618487_85069513_(-)	Exoc6b	chr6	84618487	85069513	-	14	2	23	5	13	0	8	1	4	2	12	2	11	2	6	2	1	1	12	5	8	1	7	4	13	1	4	7	6	4
Gm7507_chr6_84812240_84813247_(+)	Gm7507	chr6	84812240	84813247	+	0	0	0	0	0	0	0	0	0	0	0	0	0	0	0	0	0	0	0	0	0	0	0	0	0	0	0	0	0	0
Gm44012_chr6_84921123_84924996_(+)	Gm44012	chr6	84921123	84924996	+	0	0	0	0	0	0	0	0	0	0	0	0	0	0	0	0	0	0	0	0	0	0	0	0	0	0	0	0	0	0
Gm44011_chr6_85062574_85062967_(+)	Gm44011	chr6	85062574	85062967	+	0	0	0	0	0	0	0	0	0	0	0	0	0	0	0	0	0	0	0	0	0	0	0	0	0	0	0	0	0	0
Gm26353_chr6_85066183_85066437_(+)	Gm26353	chr6	85066183	85066437	+	0	0	0	0	0	0	0	0	0	0	0	0	0	0	0	0	0	0	0	0	0	0	0	0	0	0	0	0	0	0
Npm3-ps1_chr6_85076192_85076719_(+)	Npm3-ps1	chr6	85076192	85076719	+	0	0	0	0	0	0	0	0	0	0	0	0	0	0	0	0	0	0	0	0	0	0	0	0	0	0	0	0	0	0
Gm43954_chr6_85092235_85092778_(+)	Gm43954	chr6	85092235	85092778	+	0	0	0	0	0	0	0	0	0	0	0	0	0	0	0	0	0	0	0	0	0	0	0	0	0	0	0	0	0	0
Gm43955_chr6_85096927_85097068_(+)	Gm43955	chr6	85096927	85097068	+	0	0	0	0	0	0	0	0	0	0	0	0	0	0	0	0	0	0	0	0	0	0	0	0	0	0	0	0	0	0
Gm43957_chr6_85102813_85103569_(+)	Gm43957	chr6	85102813	85103569	+	0	0	0	0	0	0	0	0	0	0	0	0	0	0	0	0	0	0	0	0	0	0	0	0	0	0	0	0	0	0
Gm5878_chr6_85111416_85126125_(-)	Gm5878	chr6	85111416	85126125	-	0	0	0	0	0	0	0	0	0	0	0	0	0	0	0	0	1	0	0	0	1	0	0	0	1	0	0	0	0	0
Gm43959_chr6_85111693_85112269_(+)	Gm43959	chr6	85111693	85112269	+	0	0	0	0	0	0	0	0	0	0	0	0	0	0	0	0	0	0	0	0	0	0	0	0	0	0	0	0	0	0
Spr_chr6_85130176_85137766_(-)	Spr	chr6	85130176	85137766	-	16	0	11	0	12	2	13	0	3	0	2	0	0	0	2	0	1	0	6	2	2	3	1	0	3	1	3	1	2	0
Gm10444_chr6_85140505_85143649_(+)	Gm10444	chr6	85140505	85143649	+	0	0	0	0	0	0	0	0	0	0	0	0	0	0	0	0	0	0	0	0	0	0	0	0	0	0	0	0	0	0
Gm44285_chr6_85145446_85146385_(-)	Gm44285	chr6	85145446	85146385	-	0	0	0	0	0	0	0	0	0	0	0	0	0	0	0	0	0	0	0	0	0	0	0	0	0	0	0	0	0	0
Gm22893_chr6_85150336_85150451_(+)	Gm22893	chr6	85150336	85150451	+	0	0	0	0	0	0	0	0	0	0	0	0	0	0	0	0	0	0	0	0	0	0	0	0	0	0	0	0	0	0
Spr-ps1_chr6_85152621_85156223_(+)	Spr-ps1	chr6	85152621	85156223	+	0	0	0	0	0	0	0	0	0	0	0	0	0	0	0	0	0	0	0	0	0	0	0	0	0	0	0	0	0	0
Emx1_chr6_85187438_85204462_(+)	Emx1	chr6	85187438	85204462	+	0	0	0	0	0	0	1	0	0	0	0	0	0	0	0	0	0	1	0	0	0	0	0	0	0	0	0	0	0	0
Sfxn5_chr6_85213049_85333422_(-)	Sfxn5	chr6	85213049	85333422	-	7	0	2	0	7	1	2	0	7	0	5	0	2	0	6	0	3	0	8	0	5	1	2	0	2	1	2	0	6	0
Rab11fip5_chr6_85334962_85374634_(-)	Rab11fip5	chr6	85334962	85374634	-	2	0	3	2	5	0	4	0	4	0	2	1	0	0	2	2	4	1	6	1	3	0	2	0	3	0	2	0	2	0
Mir705_chr6_85336292_85336373_(-)	Mir705	chr6	85336292	85336373	-	0	0	0	0	0	0	0	0	0	0	0	0	0	0	0	0	0	0	0	0	0	0	0	0	0	0	0	0	0	0
Noto_chr6_85423886_85428877_(+)	Noto	chr6	85423886	85428877	+	0	0	0	0	0	0	0	0	0	0	0	0	0	0	0	0	0	0	0	0	0	0	0	0	0	0	0	0	0	0
Smyd5_chr6_85431989_85446435_(+)	Smyd5	chr6	85431989	85446435	+	2	2	5	0	1	0	2	0	1	2	0	2	2	1	3	1	1	0	4	4	2	0	1	1	2	2	3	1	1	0
Pradc1_chr6_85446810_85451970_(-)	Pradc1	chr6	85446810	85451970	-	0	0	0	0	0	0	0	0	0	0	0	0	0	0	0	0	1	0	1	0	1	0	0	0	3	0	3	0	0	0
Cct7_chr6_85451514_85468475_(+)	Cct7	chr6	85451514	85468475	+	12	2	11	0	7	1	9	0	0	0	2	0	3	0	8	0	3	0	13	0	15	0	7	0	9	1	9	2	9	1
Fbxo41_chr6_85469574_85502994_(-)	Fbxo41	chr6	85469574	85502994	-	13	2	5	3	9	6	15	0	3	5	10	3	4	4	25	15	5	5	26	19	49	17	11	7	12	12	29	19	41	21
Egr4_chr6_85511121_85513589_(-)	Egr4	chr6	85511121	85513589	-	1	0	0	0	0	0	0	0	0	0	0	0	0	0	0	0	0	0	0	0	0	0	0	0	0	0	0	0	0	0
Gm44023_chr6_85529452_85529920_(+)	Gm44023	chr6	85529452	85529920	+	0	0	0	0	0	0	0	0	0	0	0	0	0	0	0	0	0	0	0	0	0	0	0	0	0	0	0	0	0	0
Alms1_chr6_85587531_85702753_(+)	Alms1	chr6	85587531	85702753	+	402	112	441	108	350	116	304	0	90	48	151	67	142	101	162	108	122	72	256	156	310	142	193	128	218	149	245	140	297	155
Gm43588_chr6_85632864_85635161_(+)	Gm43588	chr6	85632864	85635161	+	2	0	4	1	2	1	1	0	4	0	1	5	2	2	2	2	4	0	6	3	4	4	0	2	7	1	2	2	6	3
Gm42600_chr6_85679277_85682864_(+)	Gm42600	chr6	85679277	85682864	+	15	2	29	2	11	2	16	0	2	0	2	1	2	1	5	2	4	1	6	1	12	1	9	1	9	2	11	1	10	0
Nat8f7_chr6_85706727_85713205_(-)	Nat8f7	chr6	85706727	85713205	-	0	0	0	0	0	1	0	0	0	0	0	0	0	0	0	0	0	0	0	0	0	0	0	0	0	0	0	0	0	0
Alms1-ps1_chr6_85721925_85756526_(+)	Alms1-ps1	chr6	85721925	85756526	+	11	5	9	9	10	8	1	0	3	1	5	5	1	6	7	1	4	0	9	6	11	3	9	3	4	9	6	6	6	5
Nat8f3_chr6_85732513_85765754_(-)	Nat8f3	chr6	85732513	85765754	-	0	0	0	0	0	0	0	0	0	0	0	0	0	0	0	0	0	0	0	0	0	1	0	0	0	0	0	0	0	0
Gm27317_chr6_85743515_85743609_(-)	Gm27317	chr6	85743515	85743609	-	0	0	0	0	0	0	0	0	0	0	0	0	0	0	0	0	0	0	0	0	0	0	0	0	0	0	0	0	0	0
Alms1-ps2_chr6_85774393_85804057_(+)	Alms1-ps2	chr6	85774393	85804057	+	3	12	4	10	1	11	0	0	1	7	6	8	1	5	4	5	1	0	6	18	3	14	4	15	5	16	2	7	3	10
Mir6375_chr6_85790140_85790234_(-)	Mir6375	chr6	85790140	85790234	-	0	0	0	0	0	0	0	0	0	0	0	0	0	0	0	0	0	0	0	0	0	0	0	0	0	0	0	0	0	0
Nat8f6_chr6_85808024_85820954_(-)	Nat8f6	chr6	85808024	85820954	-	0	0	0	0	0	0	0	0	0	0	0	0	0	0	0	0	0	0	1	0	0	0	0	0	1	0	0	0	0	0
Nat8f5_chr6_85817218_85820972_(-)	Nat8f5	chr6	85817218	85820972	-	0	0	0	0	0	0	0	0	0	0	0	0	0	0	0	0	0	0	0	0	0	0	0	0	0	0	0	0	0	0
Nat8_chr6_85830388_85832082_(-)	Nat8	chr6	85830388	85832082	-	0	0	0	0	0	0	0	0	0	0	0	0	0	0	0	0	0	0	0	0	0	0	0	0	0	0	0	0	0	0
Ptges3-ps_chr6_85843980_85844459_(+)	Ptges3-ps	chr6	85843980	85844459	+	26	0	15	0	22	0	25	0	13	0	13	0	11	0	16	0	17	0	45	0	26	0	19	0	35	0	29	0	30	0
Nat8f2_chr6_85865422_85869158_(-)	Nat8f2	chr6	85865422	85869158	-	3	3	2	2	0	3	2	0	0	2	0	2	1	1	0	4	0	5	11	5	6	6	2	4	2	6	8	2	3	4
Gm43309_chr6_85889326_85889961_(+)	Gm43309	chr6	85889326	85889961	+	0	0	0	0	0	0	0	0	0	0	0	0	0	0	0	0	0	0	0	0	0	0	0	0	0	0	0	0	0	0
Nat8f4_chr6_85899051_85904884_(-)	Nat8f4	chr6	85899051	85904884	-	9	3	3	5	7	1	9	0	0	0	0	0	2	2	2	1	2	1	13	3	6	1	5	4	6	6	4	3	3	5
Nat8f1_chr6_85910154_85915687_(-)	Nat8f1	chr6	85910154	85915687	-	12	0	11	0	9	1	4	0	3	0	1	0	2	0	2	0	0	0	6	0	11	0	1	0	7	0	8	0	3	1
Tprkb_chr6_85911865_85930284_(+)	Tprkb	chr6	85911865	85930284	+	120	24	111	18	76	14	72	0	30	10	33	7	20	4	32	8	21	11	44	14	71	19	60	19	70	13	57	15	77	17
Gm18290_chr6_85920575_85921418_(-)	Gm18290	chr6	85920575	85921418	-	0	0	0	0	0	0	0	0	0	0	0	0	0	0	0	0	0	0	0	0	0	0	0	0	0	0	0	0	0	0
Nat8b-ps_chr6_85932681_85933379_(-)	Nat8b-ps	chr6	85932681	85933379	-	0	0	0	0	0	0	0	0	0	0	0	0	0	0	0	0	0	0	0	0	0	0	0	0	0	0	0	0	0	0
Gm7542_chr6_85938439_85939215_(+)	Gm7542	chr6	85938439	85939215	+	0	0	1	0	0	0	0	0	0	0	0	0	0	0	0	0	0	0	0	0	0	0	0	0	0	0	0	0	1	0
Dusp11_chr6_85942268_85961667_(-)	Dusp11	chr6	85942268	85961667	-	180	63	167	75	192	57	145	0	35	17	70	34	61	19	47	30	50	29	113	58	92	61	102	60	104	74	88	53	122	60
Gm19265_chr6_85961623_86001926_(+)	Gm19265	chr6	85961623	86001926	+	9	3	3	5	4	2	2	1	0	0	2	2	0	0	1	1	0	0	4	1	5	3	0	2	4	5	2	0	3	1
4930553P18Rik_chr6_86004380_86009355_(+)	4930553P18Rik	chr6	86004380	86009355	+	0	0	0	0	0	0	0	0	0	0	0	0	0	0	0	0	0	0	0	0	0	0	0	0	0	0	0	0	0	0
Figla_chr6_86016171_86020996_(+)	Figla	chr6	86016171	86020996	+	0	0	0	1	0	0	0	0	0	0	0	0	0	0	1	0	0	0	0	0	0	0	0	0	0	0	0	0	0	0
Add2_chr6_86028681_86124409_(+)	Add2	chr6	86028681	86124409	+	6	4	3	6	5	4	3	0	0	3	0	2	1	3	1	2	1	2	0	0	1	3	2	3	2	3	1	2	0	2
Gm44090_chr6_86039934_86041767_(+)	Gm44090	chr6	86039934	86041767	+	0	0	2	1	0	1	0	0	0	0	0	0	0	0	0	0	0	0	0	0	0	0	0	0	0	0	0	0	0	0
Gm44089_chr6_86084366_86087080_(-)	Gm44089	chr6	86084366	86087080	-	0	0	0	0	0	0	0	0	0	0	0	0	0	0	0	0	0	0	0	0	0	0	0	0	0	0	0	0	0	0
Gm19596_chr6_86147152_86148194_(+)	Gm19596	chr6	86147152	86148194	+	0	0	0	0	0	0	0	0	0	0	0	0	0	0	0	0	0	0	0	0	0	0	0	0	0	0	0	0	0	0
Tgfa_chr6_86195223_86275719_(+)	Tgfa	chr6	86195223	86275719	+	44	12	29	15	36	10	10	0	23	8	28	8	12	12	15	12	9	15	12	5	15	14	33	14	22	18	11	4	23	13
Gm43917_chr6_86261555_86263914_(-)	Gm43917	chr6	86261555	86263914	-	0	0	0	0	0	0	0	0	0	0	0	0	0	0	0	0	0	0	0	0	0	0	0	0	0	0	0	0	0	0
Gm7545_chr6_86284887_86285894_(+)	Gm7545	chr6	86284887	86285894	+	0	0	0	1	0	0	0	0	0	0	0	0	0	0	0	0	0	1	1	0	2	0	0	0	0	2	1	0	0	0
Gm10443_chr6_86334031_86334240_(+)	Gm10443	chr6	86334031	86334240	+	0	0	0	0	0	0	0	0	0	0	0	0	0	0	0	0	0	0	0	0	0	0	0	0	0	0	0	0	0	0
Gm18862_chr6_86351851_86352984_(+)	Gm18862	chr6	86351851	86352984	+	0	0	0	0	0	0	0	0	0	0	0	0	0	0	0	0	0	0	0	0	0	0	0	0	0	0	0	0	0	0
Fam136a_chr6_86365646_86370058_(+)	Fam136a	chr6	86365646	86370058	+	240	57	311	83	241	73	155	0	44	12	51	20	36	25	57	22	39	18	234	81	155	41	133	60	147	46	187	62	170	52
Snrpg_chr6_86371304_86379328_(+)	Snrpg	chr6	86371304	86379328	+	104	15	100	22	100	17	69	0	32	3	23	10	33	7	25	6	21	9	72	8	57	8	64	11	50	13	62	8	55	14
Gm44941_chr6_86372538_86375285_(-)	Gm44941	chr6	86372538	86375285	-	0	0	0	0	0	0	0	0	0	0	0	0	0	0	0	0	0	0	0	0	0	0	0	0	0	0	0	0	0	0
Pcyox1_chr6_86386006_86397154_(-)	Pcyox1	chr6	86386006	86397154	-	98	50	139	54	118	41	88	0	35	17	55	27	33	17	53	33	37	29	102	43	115	48	58	46	65	48	76	56	117	56
Tia1_chr6_86404219_86433405_(+)	Tia1	chr6	86404219	86433405	+	249	54	217	56	203	66	161	0	79	30	130	25	99	38	99	28	77	25	142	36	150	46	137	44	178	59	142	32	107	47
Gm44790_chr6_86426658_86445630_(+)	Gm44790	chr6	86426658	86445630	+	57	12	53	18	49	15	29	0	18	9	9	1	21	5	34	6	19	5	54	14	39	12	46	11	47	12	48	11	46	12
C87436_chr6_86438374_86473500_(+)	C87436	chr6	86438374	86473500	+	61	23	68	22	52	19	31	0	21	13	29	15	27	6	33	18	26	9	55	27	50	22	52	22	50	22	49	22	67	37
A430078I02Rik_chr6_86470277_86480830_(-)	A430078I02Rik	chr6	86470277	86480830	-	5	1	8	2	2	0	6	0	1	0	3	0	0	0	3	1	1	0	6	0	2	2	3	0	3	1	5	0	5	1
2310040G24Rik_chr6_86483376_86488227_(-)	2310040G24Rik	chr6	86483376	86488227	-	5	2	3	3	7	1	2	0	1	1	4	0	0	6	2	1	4	0	5	2	6	1	3	0	5	1	4	2	2	0
Gm43936_chr6_86493216_86493909_(-)	Gm43936	chr6	86493216	86493909	-	0	0	0	1	0	1	0	0	0	0	0	0	0	0	1	0	0	0	0	2	2	2	0	1	1	0	0	1	0	0
Gm28720_chr6_86494649_86497804_(+)	Gm28720	chr6	86494649	86497804	+	0	0	3	0	1	1	2	0	1	1	0	0	1	0	2	0	0	1	0	0	1	0	2	0	0	1	4	1	1	1
Gm28719_chr6_86498781_86500537_(+)	Gm28719	chr6	86498781	86500537	+	2	0	2	0	3	0	0	0	0	1	1	0	0	0	0	0	0	0	2	0	2	2	1	0	5	0	1	0	0	2
Gm44386_chr6_86513891_86516273_(-)	Gm44386	chr6	86513891	86516273	-	2	1	2	2	1	1	2	0	0	0	0	0	1	0	3	0	0	0	2	5	2	4	1	2	2	0	2	3	5	2
Pcbp1_chr6_86524492_86526321_(-)	Pcbp1	chr6	86524492	86526321	-	1	1	3	1	2	1	2	0	1	1	0	3	3	1	0	0	1	5	0	1	0	1	0	1	2	0	0	1	0	3
1600020E01Rik_chr6_86526247_86582466_(+)	1600020E01Rik	chr6	86526247	86582466	+	280	69	366	96	253	58	159	0	135	36	152	29	210	38	127	39	121	32	266	70	130	32	181	44	203	55	201	56	147	36
Gm22184_chr6_86574100_86574161_(-)	Gm22184	chr6	86574100	86574161	-	0	0	0	0	0	0	0	0	0	0	0	0	0	0	0	0	0	0	0	0	0	0	0	0	0	0	0	0	0	0
Gm44369_chr6_86591430_86593604_(+)	Gm44369	chr6	86591430	86593604	+	3	0	1	0	0	0	3	0	0	0	1	0	2	0	0	0	0	0	0	0	2	0	0	0	0	0	0	0	0	0
Asprv1_chr6_86628164_86629710_(+)	Asprv1	chr6	86628164	86629710	+	0	0	0	0	0	0	1	0	0	0	0	0	0	0	0	0	0	0	0	0	0	0	0	0	0	0	0	0	0	0
Mxd1_chr6_86647042_86669161_(-)	Mxd1	chr6	86647042	86669161	-	18	4	15	8	23	7	13	0	5	5	8	7	12	4	13	12	9	2	15	5	12	5	9	4	14	10	7	8	10	4
Gm44292_chr6_86663188_86665551_(-)	Gm44292	chr6	86663188	86665551	-	1	0	1	1	1	0	1	0	1	0	1	0	0	0	0	0	0	2	0	1	1	1	1	0	1	1	3	2	1	0
Snrnp27_chr6_86675151_86684522_(-)	Snrnp27	chr6	86675151	86684522	-	11	11	6	6	8	6	10	0	1	0	4	0	1	5	3	6	0	4	6	8	6	4	3	5	3	3	4	6	11	10
Gm44214_chr6_86687823_86688428_(-)	Gm44214	chr6	86687823	86688428	-	0	1	0	0	0	0	1	0	0	0	0	1	1	3	1	3	0	0	0	1	0	0	0	0	0	0	0	2	0	0
Gmcl1_chr6_86691768_86733383_(-)	Gmcl1	chr6	86691768	86733383	-	148	44	153	43	143	56	111	2	49	27	94	41	95	35	125	66	79	39	193	84	201	83	136	84	188	87	185	97	165	83
Gm44036_chr6_86733489_86737065_(+)	Gm44036	chr6	86733489	86737065	+	2	1	3	2	3	0	4	0	0	0	1	0	0	0	0	0	0	1	3	3	5	1	0	0	1	0	2	1	8	0
Anxa4_chr6_86736840_86793584_(-)	Anxa4	chr6	86736840	86793584	-	81	39	75	30	71	36	54	0	33	37	54	53	47	43	92	86	69	73	102	109	87	97	52	60	92	86	87	88	121	119
2610306M01Rik_chr6_86848399_86849440_(-)	2610306M01Rik	chr6	86848399	86849440	-	3	0	3	1	1	0	1	0	0	0	0	2	0	1	2	0	1	0	1	1	0	1	0	1	1	1	0	1	1	0
Aak1_chr6_86849517_87003223_(+)	Aak1	chr6	86849517	87003223	+	419	128	375	143	383	93	236	1	170	105	228	129	185	111	182	119	137	66	311	177	239	130	264	164	260	175	301	153	295	165
Gm44153_chr6_86862873_86864452_(+)	Gm44153	chr6	86862873	86864452	+	2	3	2	1	2	1	3	0	2	1	1	0	3	1	3	1	2	3	0	0	3	2	0	0	4	4	3	1	5	1
Gm44152_chr6_86873786_86875476_(+)	Gm44152	chr6	86873786	86875476	+	3	0	3	1	2	1	0	0	0	0	2	0	2	0	0	0	0	0	3	0	2	0	1	1	5	0	0	0	0	0
Gm44093_chr6_86961641_86963442_(+)	Gm44093	chr6	86961641	86963442	+	0	0	0	0	3	0	0	0	0	1	0	0	1	0	2	0	1	0	4	0	1	0	2	0	1	0	1	0	2	0
Gm44091_chr6_86976529_86977177_(+)	Gm44091	chr6	86976529	86977177	+	1	0	0	0	0	0	0	0	0	0	1	0	0	0	1	0	0	0	0	0	1	0	1	0	1	0	0	0	0	0
Nfu1_chr6_87009236_87028461_(+)	Nfu1	chr6	87009236	87028461	+	165	31	218	34	158	34	166	0	32	20	87	27	72	12	69	27	48	16	164	45	125	38	84	43	111	44	99	47	162	55
Gfpt1_chr6_87042846_87092197_(+)	Gfpt1	chr6	87042846	87092197	+	158	86	174	81	147	58	128	0	30	21	53	41	46	36	59	54	44	26	64	89	93	89	52	90	94	87	69	87	97	89
D6Ertd527e_chr6_87104746_87112997_(+)	D6Ertd527e	chr6	87104746	87112997	+	0	0	0	0	0	0	0	0	0	0	1	0	0	0	0	0	1	0	0	0	0	0	0	0	0	0	0	1	0	0
Antxr1_chr6_87133853_87335821_(-)	Antxr1	chr6	87133853	87335821	-	69	15	62	22	62	14	37	0	25	4	21	6	15	7	12	10	13	5	51	4	15	7	18	17	30	13	30	8	21	11
Gm44415_chr6_87138741_87140852_(-)	Gm44415	chr6	87138741	87140852	-	0	0	0	0	0	0	0	0	0	0	0	0	0	0	0	0	0	0	1	0	0	0	0	0	0	0	0	0	0	0
Gm44416_chr6_87171944_87174009_(-)	Gm44416	chr6	87171944	87174009	-	0	0	1	0	1	0	1	0	1	0	0	0	0	0	1	0	0	0	2	0	0	0	2	0	0	0	0	0	0	0
Gm44417_chr6_87252250_87255608_(-)	Gm44417	chr6	87252250	87255608	-	2	0	1	1	4	1	1	0	1	0	0	0	1	0	0	0	1	0	0	0	2	0	1	0	0	0	0	0	2	1
Gm44418_chr6_87277745_87279750_(+)	Gm44418	chr6	87277745	87279750	+	0	0	0	0	0	0	0	0	0	0	0	0	0	0	0	0	0	0	0	0	0	0	0	0	0	0	0	0	0	0
n-R5s164_chr6_87281149_87281260_(+)	n-R5s164	chr6	87281149	87281260	+	0	0	0	0	0	0	0	0	0	0	0	0	0	0	0	0	0	0	0	0	0	0	0	0	0	0	0	0	0	0
9530013L04Rik_chr6_87321558_87322339_(-)	9530013L04Rik	chr6	87321558	87322339	-	0	0	0	0	0	0	0	0	0	0	0	0	0	1	0	0	0	0	1	0	0	0	0	0	0	0	0	0	0	0
Gm44414_chr6_87332752_87334860_(-)	Gm44414	chr6	87332752	87334860	-	0	0	0	0	0	0	0	0	0	0	0	0	0	0	0	0	0	0	0	0	0	0	1	0	0	0	0	0	0	0
Gkn1_chr6_87345650_87350942_(-)	Gkn1	chr6	87345650	87350942	-	0	0	0	0	0	0	0	0	0	0	0	0	0	0	0	0	0	0	0	0	0	0	0	0	0	0	0	0	0	0
Gkn2_chr6_87373357_87379497_(+)	Gkn2	chr6	87373357	87379497	+	0	0	0	0	0	0	0	0	0	0	0	0	0	0	0	0	0	0	0	0	0	0	0	0	0	0	0	0	0	0
Gkn3_chr6_87383256_87388935_(-)	Gkn3	chr6	87383256	87388935	-	0	0	0	0	0	0	0	0	0	0	0	0	0	0	0	0	0	0	0	0	0	0	0	0	0	0	0	0	0	0
Bmp10_chr6_87428994_87437677_(+)	Bmp10	chr6	87428994	87437677	+	1	0	0	0	0	0	0	0	1	0	0	0	0	0	0	0	0	0	1	0	0	0	0	0	0	0	0	0	0	1
Arhgap25_chr6_87458545_87533259_(-)	Arhgap25	chr6	87458545	87533259	-	5	2	2	0	2	1	3	0	3	0	2	0	1	1	1	0	1	1	6	0	6	0	2	1	0	1	2	3	2	2
Gm44198_chr6_87533407_87536042_(+)	Gm44198	chr6	87533407	87536042	+	0	0	0	0	0	0	0	0	0	0	0	0	0	0	0	0	0	0	0	0	0	0	0	0	0	0	0	0	0	0
Prokr1_chr6_87578591_87590743_(-)	Prokr1	chr6	87578591	87590743	-	4	1	2	0	4	3	3	0	0	0	0	2	0	1	0	0	1	1	1	1	1	1	0	2	0	2	1	0	2	2
Gm34312_chr6_87597747_87599187_(+)	Gm34312	chr6	87597747	87599187	+	0	0	0	0	0	0	0	0	0	0	0	0	0	0	0	0	0	0	0	0	0	0	0	0	0	0	0	1	0	0
Aplf_chr6_87628424_87672193_(-)	Aplf	chr6	87628424	87672193	-	112	31	104	26	110	29	106	0	44	12	56	24	51	34	63	39	33	19	140	62	117	52	93	41	109	50	119	39	135	40
Gm44097_chr6_87657754_87663823_(+)	Gm44097	chr6	87657754	87663823	+	0	0	0	0	0	0	0	0	0	0	0	0	0	0	0	0	0	0	0	0	0	0	0	0	0	0	0	0	0	0
E230015B07Rik_chr6_87671983_87681024_(+)	E230015B07Rik	chr6	87671983	87681024	+	2	0	3	0	1	0	0	0	0	0	1	0	0	0	3	0	0	0	1	0	0	0	1	0	0	0	4	0	1	0
1810020O05Rik_chr6_87675590_87722801_(-)	1810020O05Rik	chr6	87675590	87722801	-	4	2	7	1	0	2	3	0	0	0	2	1	1	2	6	3	0	1	4	3	1	1	1	0	0	1	4	1	4	2
Gm44210_chr6_87729964_87731148_(-)	Gm44210	chr6	87729964	87731148	-	1	1	0	0	0	0	0	0	0	0	0	0	0	0	0	0	0	0	0	0	0	1	0	0	0	0	0	1	0	0
Efcc1_chr6_87730869_87755908_(+)	Efcc1	chr6	87730869	87755908	+	0	0	1	1	0	0	1	0	0	1	1	0	3	0	2	5	1	0	1	0	3	4	1	0	3	1	0	0	1	1
Gm5879_chr6_87764996_87766204_(-)	Gm5879	chr6	87764996	87766204	-	0	0	0	0	0	0	0	0	0	0	0	0	0	0	0	0	0	0	0	0	0	0	0	0	0	0	0	0	0	0
Gm43904_chr6_87776143_87777480_(+)	Gm43904	chr6	87776143	87777480	+	0	0	0	0	0	0	0	0	0	0	0	0	0	0	0	0	0	0	0	0	0	0	0	0	0	0	0	0	0	0
Gp9_chr6_87778072_87779768_(+)	Gp9	chr6	87778072	87779768	+	0	0	0	0	0	0	0	0	0	0	0	0	0	0	0	0	0	0	0	0	0	0	0	0	0	0	0	0	0	0
Rab43_chr6_87788853_87812164_(-)	Rab43	chr6	87788853	87812164	-	37	11	17	7	16	6	24	0	9	3	19	3	12	5	12	12	5	9	21	8	24	13	16	6	16	9	14	14	18	5
Gm45140_chr6_87788861_87835795_(-)	Gm45140	chr6	87788861	87835795	-	152	102	153	78	148	77	112	1	41	19	74	33	68	26	80	34	66	39	93	62	85	63	113	58	100	54	97	50	98	65
Gm44423_chr6_87796070_87799227_(-)	Gm44423	chr6	87796070	87799227	-	2	2	4	0	1	3	2	0	2	2	1	1	2	3	5	5	1	0	0	3	5	3	7	1	3	2	3	1	3	1
9930120I10Rik_chr6_87805472_87806336_(-)	9930120I10Rik	chr6	87805472	87806336	-	1	3	1	0	0	0	1	0	1	1	1	2	0	1	2	1	1	2	2	0	3	4	1	0	1	0	0	1	1	1
Isy1_chr6_87814269_87838798_(-)	Isy1	chr6	87814269	87838798	-	95	51	108	56	119	50	79	0	33	17	39	25	29	28	47	32	34	19	108	59	54	42	72	64	64	51	68	42	83	37
B130021K23Rik_chr6_87830274_87832866_(-)	B130021K23Rik	chr6	87830274	87832866	-	27	6	21	2	29	5	25	0	9	0	18	3	14	4	23	3	11	5	40	9	21	5	32	4	31	8	18	8	34	7
Cnbp_chr6_87842615_87851106_(-)	Cnbp	chr6	87842615	87851106	-	448	325	557	384	442	361	464	1	123	100	183	105	193	127	207	142	111	106	414	339	344	305	290	264	284	266	329	238	362	253
Gm44064_chr6_87851209_87852295_(+)	Gm44064	chr6	87851209	87852295	+	1	0	1	1	1	0	0	0	0	0	0	0	0	0	0	0	0	0	1	1	0	0	2	0	0	0	0	0	0	3
Copg1_chr6_87887814_87913595_(+)	Copg1	chr6	87887814	87913595	+	454	276	480	264	453	243	378	0	117	114	143	113	132	135	161	204	129	147	341	343	288	278	248	281	243	291	283	275	294	255
Gm26636_chr6_87908843_87914459_(-)	Gm26636	chr6	87908843	87914459	-	1	1	1	2	0	0	1	0	0	1	0	2	0	0	0	0	2	0	1	1	0	0	0	1	1	2	2	0	0	0
Hmces_chr6_87913935_87936629_(+)	Hmces	chr6	87913935	87936629	+	324	41	261	31	310	34	399	0	139	38	158	32	126	37	122	62	103	40	375	106	222	107	196	65	224	92	291	102	275	101
Rps19-ps9_chr6_87948464_87948877_(-)	Rps19-ps9	chr6	87948464	87948877	-	0	0	0	0	0	0	0	0	0	1	0	0	1	0	0	0	0	1	0	0	0	0	0	1	0	1	0	1	0	0
H1f10_chr6_87980421_87981637_(-)	H1f10	chr6	87980421	87981637	-	29	9	9	14	15	17	28	0	6	13	1	13	11	6	8	19	5	6	26	17	33	26	20	22	28	38	21	29	21	20
Gm5577_chr6_87980883_88005471_(+)	Gm5577	chr6	87980883	88005471	+	22	4	33	8	23	1	20	0	11	3	13	7	15	4	26	6	10	12	27	11	32	8	35	5	18	5	28	8	41	10
Gm47286_chr6_87981614_87981741_(-)	Gm47286	chr6	87981614	87981741	-	0	0	0	0	0	0	0	0	0	0	0	0	0	0	0	0	0	0	0	0	0	0	0	0	0	0	0	0	0	0
Gm44168_chr6_87986191_87989729_(+)	Gm44168	chr6	87986191	87989729	+	12	0	9	0	14	0	9	0	2	0	3	0	5	0	4	2	4	1	10	0	10	0	9	1	14	0	7	1	9	0
4933412L11Rik_chr6_87993136_87994179_(-)	4933412L11Rik	chr6	87993136	87994179	-	0	0	0	0	0	0	0	0	0	0	0	0	0	0	0	0	0	0	0	0	0	0	0	0	0	0	0	0	0	0
Rab7_chr6_87999106_88045270_(-)	Rab7	chr6	87999106	88045270	-	809	109	812	108	766	111	448	0	268	47	366	68	330	69	424	65	330	59	730	105	535	81	618	107	648	133	569	100	577	85
Gm44187_chr6_88040539_88042467_(-)	Gm44187	chr6	88040539	88042467	-	13	19	13	6	14	15	18	0	7	5	8	14	4	1	9	8	8	6	20	12	19	7	13	12	20	5	10	6	19	15
Rpn1_chr6_88084482_88105304_(+)	Rpn1	chr6	88084482	88105304	+	154	129	177	123	162	117	167	0	52	37	72	52	54	48	88	64	59	57	185	196	159	158	140	164	152	176	158	138	174	191
Mir6376_chr6_88104128_88104258_(-)	Mir6376	chr6	88104128	88104258	-	0	0	0	0	0	0	0	0	0	0	0	0	0	0	0	0	0	0	0	0	0	0	0	0	0	0	0	0	0	0
Gm38708_chr6_88188397_88190681_(-)	Gm38708	chr6	88188397	88190681	-	3	1	1	1	0	3	1	0	0	0	1	0	0	0	1	1	0	0	0	0	1	0	0	0	0	0	2	0	1	0
Gata2_chr6_88193891_88207032_(+)	Gata2	chr6	88193891	88207032	+	12	0	15	0	10	0	2	0	1	0	0	0	2	0	1	0	1	0	5	0	2	0	3	0	1	0	4	0	3	0
Gm44388_chr6_88216245_88216502_(-)	Gm44388	chr6	88216245	88216502	-	0	0	0	0	0	0	0	0	0	0	0	0	0	0	0	0	0	0	0	0	0	0	0	0	0	0	0	0	0	0
Dnajb8_chr6_88222268_88254415_(+)	Dnajb8	chr6	88222268	88254415	+	0	0	0	0	0	0	0	0	0	0	0	1	0	0	0	0	0	0	0	0	0	0	0	0	0	0	0	0	0	0
1700031F10Rik_chr6_88222602_88225678_(-)	1700031F10Rik	chr6	88222602	88225678	-	0	0	1	0	0	0	0	0	0	0	0	0	0	0	0	0	0	0	0	0	0	0	0	0	0	0	0	0	0	0
Eefsec_chr6_88257334_88446539_(-)	Eefsec	chr6	88257334	88446539	-	497	118	402	100	399	91	336	0	202	74	266	115	218	79	433	170	248	113	422	179	488	159	380	162	405	176	431	153	465	174
Gm44265_chr6_88353142_88353606_(-)	Gm44265	chr6	88353142	88353606	-	5	0	8	1	3	0	1	0	1	0	2	0	2	0	4	0	2	0	5	0	3	0	4	0	3	0	3	0	6	0
Gm25178_chr6_88405977_88406301_(+)	Gm25178	chr6	88405977	88406301	+	0	0	0	0	0	0	0	0	0	0	0	0	0	0	0	0	0	0	0	0	0	0	0	0	0	0	0	0	0	0
Gm44264_chr6_88445687_88446513_(+)	Gm44264	chr6	88445687	88446513	+	0	0	0	0	0	0	0	0	0	0	0	1	0	0	0	0	1	0	0	0	0	0	0	0	0	1	0	0	0	0
Ruvbl1_chr6_88465409_88497572_(+)	Ruvbl1	chr6	88465409	88497572	+	96	37	91	43	83	33	73	4	45	14	61	18	37	17	54	16	33	6	88	38	67	28	55	26	86	41	40	29	64	31
Sec61a1_chr6_88503579_88518905_(-)	Sec61a1	chr6	88503579	88518905	-	317	50	373	47	319	43	182	0	92	29	135	16	109	18	151	36	98	13	275	55	262	47	264	64	246	63	222	38	234	41
Gm44170_chr6_88503605_88504277_(+)	Gm44170	chr6	88503605	88504277	+	0	0	1	0	0	0	0	0	0	0	0	0	0	0	0	0	0	0	0	0	0	0	0	0	0	0	0	0	0	0
Gm44430_chr6_88519013_88520007_(+)	Gm44430	chr6	88519013	88520007	+	0	2	4	2	4	2	1	0	0	0	0	0	1	0	0	0	0	1	4	1	2	1	0	1	3	2	4	3	3	1
Kbtbd12_chr6_88545114_88637950_(-)	Kbtbd12	chr6	88545114	88637950	-	6	1	3	0	3	1	3	0	1	2	0	0	0	0	1	0	0	0	1	1	2	1	1	0	1	0	2	0	0	0
Gm26588_chr6_88716422_88725860_(-)	Gm26588	chr6	88716422	88725860	-	0	0	0	0	2	0	0	0	0	0	0	0	0	0	0	1	0	0	0	0	0	0	0	0	2	1	0	0	0	0
Mgll_chr6_88724412_88828360_(+)	Mgll	chr6	88724412	88828360	+	40	5	26	6	15	2	15	0	6	4	11	5	6	3	6	6	3	6	9	9	8	5	4	3	13	5	16	8	13	10
Gm44005_chr6_88738192_88741364_(+)	Gm44005	chr6	88738192	88741364	+	1	0	0	0	0	0	1	0	0	0	0	0	0	0	1	0	0	0	0	0	0	0	0	0	1	0	0	0	1	0
Gm43999_chr6_88742727_88745615_(+)	Gm43999	chr6	88742727	88745615	+	2	0	0	0	0	1	0	0	1	0	0	0	1	1	0	0	1	0	0	0	0	0	1	0	0	0	1	0	0	0
Gm43937_chr6_88784330_88787451_(-)	Gm43937	chr6	88784330	88787451	-	0	0	0	1	0	0	0	0	0	0	0	0	0	0	0	0	0	0	0	0	0	0	0	0	0	0	0	0	0	0
Gm44001_chr6_88802243_88806015_(+)	Gm44001	chr6	88802243	88806015	+	2	0	1	0	1	1	1	0	0	0	0	0	0	2	0	0	0	0	0	0	1	0	0	0	0	0	0	0	0	0
Abtb1_chr6_88835914_88841984_(-)	Abtb1	chr6	88835914	88841984	-	29	13	30	8	31	5	14	0	13	1	12	5	11	4	19	5	11	7	38	23	46	20	23	16	27	15	25	19	40	28
Podxl2_chr6_88842558_88875044_(-)	Podxl2	chr6	88842558	88875044	-	6	1	4	0	7	2	8	0	1	4	3	2	3	2	4	2	4	1	9	3	10	4	9	5	3	3	5	4	5	3
Gm15612_chr6_88842854_88847274_(+)	Gm15612	chr6	88842854	88847274	+	2	2	2	0	0	2	3	0	1	2	3	1	1	0	0	0	1	1	3	1	5	4	0	2	4	2	1	3	5	4
Gm36189_chr6_88882655_88883177_(+)	Gm36189	chr6	88882655	88883177	+	0	0	0	0	0	0	1	0	0	0	0	0	2	0	0	0	0	0	0	0	0	0	0	0	1	0	0	0	0	0
Mcm2_chr6_88883474_88898780_(-)	Mcm2	chr6	88883474	88898780	-	1919	152	2050	152	1934	122	1027	0	482	40	621	56	482	56	718	72	554	55	1494	147	1407	115	1106	85	1181	93	1213	84	1465	120
Tpra1_chr6_88902251_88912238_(+)	Tpra1	chr6	88902251	88912238	+	31	3	30	5	34	3	23	0	25	1	35	3	18	1	35	3	22	4	32	0	37	4	20	7	34	7	22	6	31	5
Gm44178_chr6_88919708_88922637_(+)	Gm44178	chr6	88919708	88922637	+	2	1	1	1	0	0	0	0	0	1	2	0	0	0	0	0	1	0	0	0	3	0	1	0	2	0	0	0	0	0
4933427D06Rik_chr6_88950683_89110031_(+)	4933427D06Rik	chr6	88950683	89110031	+	12	5	2	2	5	2	6	0	4	1	7	4	2	1	13	11	7	7	25	21	17	19	5	9	23	10	15	18	33	35
Gm1965_chr6_89140994_89147388_(+)	Gm1965	chr6	89140994	89147388	+	0	0	0	0	0	0	0	0	0	0	0	0	0	0	1	0	0	1	0	0	0	0	0	1	0	0	1	0	0	0
Gm6507_chr6_89184672_89186025_(-)	Gm6507	chr6	89184672	89186025	-	0	0	0	0	0	0	0	0	0	0	0	0	0	0	0	0	0	0	0	0	0	0	0	0	0	0	0	0	0	0
Gm44203_chr6_89201253_89201559_(+)	Gm44203	chr6	89201253	89201559	+	0	0	0	0	0	0	0	0	0	0	0	0	0	0	0	0	0	0	0	0	0	0	0	0	0	0	0	0	0	0
Gm839_chr6_89211165_89216237_(-)	Gm839	chr6	89211165	89216237	-	0	0	0	0	0	0	0	0	0	0	0	0	0	0	0	0	0	0	0	0	0	0	0	0	0	0	0	0	0	0
Gm25961_chr6_89249468_89249602_(-)	Gm25961	chr6	89249468	89249602	-	0	0	0	0	0	0	0	0	0	0	0	0	0	0	0	0	0	0	0	0	0	0	0	0	0	0	0	0	0	0
Gm44204_chr6_89257820_89259136_(-)	Gm44204	chr6	89257820	89259136	-	0	0	0	0	0	0	0	0	0	0	0	0	0	0	0	0	0	1	0	0	0	0	0	0	0	0	0	0	0	0
4930512J16Rik_chr6_89269511_89285725_(-)	4930512J16Rik	chr6	89269511	89285725	-	5	1	4	2	2	0	5	0	0	0	1	0	1	1	3	1	2	1	5	7	8	7	2	2	2	3	5	7	12	4
Gm26811_chr6_89304630_89327621_(+)	Gm26811	chr6	89304630	89327621	+	1	0	1	0	0	0	0	0	2	0	2	0	1	0	1	0	0	0	0	0	0	0	0	0	1	0	1	0	0	0
Plxna1_chr6_89316314_89362620_(-)	Plxna1	chr6	89316314	89362620	-	580	0	525	0	630	1	226	0	270	0	342	2	267	0	462	1	296	4	373	0	423	0	391	0	470	0	291	0	396	2
Gm44207_chr6_89345140_89346563_(+)	Gm44207	chr6	89345140	89346563	+	0	0	0	0	0	0	0	0	0	0	0	0	0	0	0	0	0	0	0	0	0	0	0	0	0	0	0	0	0	0
Chchd6_chr6_89383146_89595652_(-)	Chchd6	chr6	89383146	89595652	-	245	2	315	0	280	1	155	0	106	2	162	0	154	0	221	1	166	0	281	6	248	1	257	0	249	3	225	1	254	3
Gm43903_chr6_89526839_89527455_(-)	Gm43903	chr6	89526839	89527455	-	0	0	0	0	0	0	0	0	0	0	0	0	0	0	0	0	0	0	0	0	0	0	0	0	0	0	0	0	0	0
Txnrd3_chr6_89643988_89675529_(+)	Txnrd3	chr6	89643988	89675529	+	50	0	49	0	38	0	30	0	19	0	33	0	15	0	47	0	35	0	47	0	65	0	32	0	49	0	55	0	61	0
Vmn1r-ps25_chr6_89698719_89699517_(-)	Vmn1r-ps25	chr6	89698719	89699517	-	0	0	0	0	0	0	0	0	0	0	0	0	0	0	0	0	0	0	0	0	0	0	0	0	0	0	0	0	0	0
Vmn1r40_chr6_89707540_89716657_(+)	Vmn1r40	chr6	89707540	89716657	+	0	0	0	0	0	0	0	0	0	0	0	0	0	0	0	0	0	0	0	0	0	0	0	0	0	0	0	0	0	0
Vmn1r41_chr6_89740766_89747645_(+)	Vmn1r41	chr6	89740766	89747645	+	0	0	0	0	0	0	0	0	0	0	0	0	0	0	0	0	0	0	0	0	0	0	0	0	0	0	0	0	0	0
Vmn1r-ps26_chr6_89789449_89790288_(+)	Vmn1r-ps26	chr6	89789449	89790288	+	0	0	0	0	0	0	0	0	0	0	0	0	0	0	0	0	0	0	0	0	0	0	0	0	0	0	0	0	0	0
Vmn1r-ps27_chr6_89802827_89806102_(-)	Vmn1r-ps27	chr6	89802827	89806102	-	0	0	0	0	0	0	0	0	0	0	0	0	0	0	0	0	0	0	0	0	0	0	0	0	0	0	0	0	0	0
Vmn1r42_chr6_89842573_89876413_(-)	Vmn1r42	chr6	89842573	89876413	-	2	0	1	0	0	0	0	0	0	0	0	0	0	0	0	0	0	1	0	0	0	0	1	0	1	0	0	0	0	0
Vmn1r43_chr6_89858934_89876413_(-)	Vmn1r43	chr6	89858934	89876413	-	1	0	1	0	3	0	0	1	0	0	0	1	0	0	0	2	0	0	2	0	0	0	1	1	0	1	1	0	0	1
Vmn1r44_chr6_89883660_89894888_(+)	Vmn1r44	chr6	89883660	89894888	+	0	0	0	0	0	0	0	0	0	0	0	0	0	0	0	0	0	0	0	1	0	0	0	0	0	0	0	0	0	0
Vmn1r-ps28_chr6_89907677_89908618_(+)	Vmn1r-ps28	chr6	89907677	89908618	+	0	0	0	0	0	0	0	0	0	0	0	0	0	0	0	0	0	0	0	0	0	0	0	0	0	0	0	0	0	0
Vmn1r45_chr6_89931649_89940598_(-)	Vmn1r45	chr6	89931649	89940598	-	0	0	0	0	0	0	0	0	0	0	0	0	0	0	0	0	0	0	0	0	0	0	0	0	0	0	0	0	0	0
Vmn1r46_chr6_89969313_89986721_(+)	Vmn1r46	chr6	89969313	89986721	+	0	0	0	0	0	0	0	0	0	0	0	0	0	0	0	0	0	0	0	0	0	0	0	1	0	0	0	0	0	0
Vmn1r-ps29_chr6_89997612_90004589_(+)	Vmn1r-ps29	chr6	89997612	90004589	+	0	1	0	0	0	0	0	0	0	0	0	1	0	0	0	0	0	0	0	0	0	0	0	0	0	1	0	0	0	3
Vmn1r47_chr6_90016147_90027477_(+)	Vmn1r47	chr6	90016147	90027477	+	0	0	0	0	0	0	0	0	0	0	0	0	0	0	0	0	0	0	0	0	0	0	0	0	0	0	0	0	0	0
Vmn1r48_chr6_90035933_90036841_(-)	Vmn1r48	chr6	90035933	90036841	-	0	0	0	0	0	0	0	0	0	0	0	0	0	0	0	0	0	0	0	0	0	0	0	0	0	0	0	0	0	0
Vmn1r-ps31_chr6_90056409_90056646_(-)	Vmn1r-ps31	chr6	90056409	90056646	-	0	0	0	0	0	0	0	0	0	0	0	0	0	0	0	0	0	0	0	0	0	0	0	0	0	0	0	0	0	0
Gm20534_chr6_90056626_90056797_(+)	Gm20534	chr6	90056626	90056797	+	0	0	0	0	0	0	0	0	0	0	0	0	0	0	0	0	0	0	0	0	0	0	0	0	0	0	0	0	0	0
Vmn1r49_chr6_90071893_90078506_(-)	Vmn1r49	chr6	90071893	90078506	-	0	0	0	0	0	0	0	0	0	0	0	0	0	0	0	0	0	0	0	0	0	0	0	0	0	0	0	0	0	0
Vmn1r50_chr6_90101430_90109109_(+)	Vmn1r50	chr6	90101430	90109109	+	0	0	0	0	0	0	0	0	0	0	0	0	0	0	0	0	0	0	0	0	0	0	0	0	0	0	0	0	0	0
Vmn1r51_chr6_90122596_90132264_(+)	Vmn1r51	chr6	90122596	90132264	+	0	0	0	0	0	0	0	0	0	0	0	0	0	0	0	0	0	0	0	0	0	0	0	0	0	0	0	0	0	0
Gm20426_chr6_90131441_90232817_(-)	Gm20426	chr6	90131441	90232817	-	58	0	23	0	35	0	25	0	5	0	10	0	15	0	1	1	5	1	40	1	18	1	10	0	13	0	34	0	42	0
Vmn1r-ps32_chr6_90146431_90155644_(+)	Vmn1r-ps32	chr6	90146431	90155644	+	0	0	0	0	0	0	0	0	0	0	0	0	0	0	0	0	0	0	0	0	0	0	0	0	0	0	0	0	0	0
Vmn1r52_chr6_90174808_90181248_(+)	Vmn1r52	chr6	90174808	90181248	+	0	0	0	0	0	0	0	0	0	0	0	0	0	0	0	0	0	0	0	0	0	0	0	0	0	0	0	0	0	0
V1ra8_chr6_90202786_90205866_(+)	V1ra8	chr6	90202786	90205866	+	0	0	0	0	0	0	0	0	0	0	0	0	0	0	0	0	0	0	0	0	0	0	0	0	0	0	0	0	0	0
Vmn1r53_chr6_90223317_90224438_(-)	Vmn1r53	chr6	90223317	90224438	-	4	0	2	0	4	0	1	0	3	0	1	0	0	0	0	0	0	0	1	0	1	0	0	0	3	0	0	0	2	0
Gm4287_chr6_90235689_90236273_(+)	Gm4287	chr6	90235689	90236273	+	0	0	0	0	0	0	0	0	0	0	0	0	0	0	0	0	0	0	0	0	0	0	0	0	0	0	0	0	0	0
Vmn1r-ps34_chr6_90242272_90243214_(+)	Vmn1r-ps34	chr6	90242272	90243214	+	0	0	0	0	0	0	0	0	0	0	0	0	0	0	0	0	0	0	0	0	0	0	0	0	0	0	0	0	0	0
Vmn1r54_chr6_90246300_90271213_(+)	Vmn1r54	chr6	90246300	90271213	+	0	0	0	0	0	0	0	0	0	0	0	0	0	0	0	0	0	0	0	0	0	0	0	0	0	0	0	0	0	0
Gm43891_chr6_90296222_90299333_(+)	Gm43891	chr6	90296222	90299333	+	0	0	0	0	0	0	0	0	0	0	0	0	0	0	0	0	0	0	0	0	0	0	0	0	0	0	0	0	0	0
BC048671_chr6_90301219_90305449_(+)	BC048671	chr6	90301219	90305449	+	0	0	0	0	0	0	0	0	0	0	0	0	0	0	0	0	0	0	0	0	0	0	0	0	0	0	0	0	0	0
Chst13_chr6_90308349_90325185_(-)	Chst13	chr6	90308349	90325185	-	2	0	1	2	0	0	1	0	0	0	0	0	0	0	2	0	1	0	0	0	2	0	1	0	0	0	2	0	0	0
Uroc1_chr6_90333284_90364551_(+)	Uroc1	chr6	90333284	90364551	+	0	0	0	0	1	0	0	0	0	0	0	0	0	0	0	0	0	0	0	0	1	0	0	0	1	0	1	0	0	0
Zxdc_chr6_90369492_90403490_(+)	Zxdc	chr6	90369492	90403490	+	141	0	136	0	157	0	78	1	73	0	104	0	84	0	124	1	101	0	115	0	131	0	92	0	151	0	101	0	155	0
C030015A19Rik_chr6_90386807_90389357_(+)	C030015A19Rik	chr6	90386807	90389357	+	26	0	21	0	15	0	8	0	7	0	6	0	7	0	12	0	5	0	19	0	27	0	18	0	18	1	17	0	28	0
Cfap100_chr6_90403479_90428797_(-)	Cfap100	chr6	90403479	90428797	-	1	0	1	0	2	0	0	0	0	0	2	0	0	0	0	0	0	0	0	0	0	0	1	0	1	0	0	0	0	0
Gm44117_chr6_90459711_90461468_(-)	Gm44117	chr6	90459711	90461468	-	2	0	0	0	0	0	0	0	0	0	1	0	0	0	0	0	0	0	0	0	0	0	0	0	0	0	0	0	1	0
Klf15_chr6_90462576_90475238_(+)	Klf15	chr6	90462576	90475238	+	43	0	23	0	30	0	33	0	14	0	38	0	18	0	36	0	22	0	43	0	56	0	26	0	33	0	29	0	40	0
Gm44421_chr6_90478466_90479686_(+)	Gm44421	chr6	90478466	90479686	+	0	0	0	0	1	0	0	0	1	0	0	0	1	0	0	0	1	0	2	0	0	0	0	0	0	0	0	0	0	0
Gm45901_chr6_90486393_90519480_(+)	Gm45901	chr6	90486393	90519480	+	0	0	2	0	1	0	0	0	2	0	0	0	1	0	3	0	2	0	2	0	6	0	5	0	2	0	4	0	5	0
Aldh1l1_chr6_90486427_90600203_(+)	Aldh1l1	chr6	90486427	90600203	+	35	0	36	1	35	0	24	0	21	0	20	0	22	0	52	0	30	0	30	0	41	0	30	0	41	0	14	0	36	0
Gm44236_chr6_90513302_90513814_(+)	Gm44236	chr6	90513302	90513814	+	0	0	0	0	0	0	0	0	0	0	0	0	0	0	0	0	0	0	0	0	0	0	0	0	0	0	2	0	0	0
Gm15756_chr6_90596697_90599948_(-)	Gm15756	chr6	90596697	90599948	-	0	0	0	0	0	0	0	0	0	0	0	0	0	0	0	0	0	0	0	0	0	0	0	0	0	0	0	0	0	0
Slc41a3_chr6_90604725_90646412_(+)	Slc41a3	chr6	90604725	90646412	+	13	0	15	0	13	0	10	0	13	0	9	0	10	0	13	0	8	0	14	0	18	0	16	0	22	0	15	0	14	0
Iqsec1_chr6_90656088_90988685_(-)	Iqsec1	chr6	90656088	90988685	-	674	21	659	24	673	28	307	1	404	20	484	34	379	22	531	37	398	18	650	37	462	31	567	44	616	60	522	25	518	38
Gm24816_chr6_90681370_90681520_(-)	Gm24816	chr6	90681370	90681520	-	0	0	0	0	0	0	0	0	0	0	0	0	0	0	0	0	0	0	0	0	0	0	0	0	0	0	0	0	0	0
Gm44123_chr6_90689731_90690829_(+)	Gm44123	chr6	90689731	90690829	+	0	0	0	0	0	0	0	0	0	0	0	0	0	0	0	0	0	0	0	0	0	0	0	0	0	0	0	0	0	0
Gm44105_chr6_90793896_90794475_(-)	Gm44105	chr6	90793896	90794475	-	0	0	0	0	0	0	0	0	0	0	0	0	0	0	0	0	0	0	0	0	0	0	0	0	0	0	0	0	0	0
Rpl21-ps12_chr6_90844981_90845460_(-)	Rpl21-ps12	chr6	90844981	90845460	-	2	0	1	0	0	0	1	1	2	0	2	0	1	1	1	0	1	0	2	0	2	0	2	0	2	0	0	0	3	0
Gm25185_chr6_90857537_90857632_(+)	Gm25185	chr6	90857537	90857632	+	0	0	0	0	0	0	0	0	0	0	0	0	0	0	0	0	0	0	0	0	0	0	0	0	0	0	0	0	0	0
Ppp1r2-ps2_chr6_90905819_90906453_(+)	Ppp1r2-ps2	chr6	90905819	90906453	+	0	0	0	0	0	0	0	0	0	0	0	0	0	0	0	0	0	0	0	0	0	0	0	0	0	0	0	0	0	0
Nup210_chr6_91013068_91116829_(-)	Nup210	chr6	91013068	91116829	-	1241	0	1251	2	1156	1	638	1	429	1	598	0	449	0	606	1	449	1	711	0	632	0	571	2	700	0	645	0	727	1
Gm44278_chr6_91119824_91120935_(-)	Gm44278	chr6	91119824	91120935	-	3	0	1	0	2	0	2	0	0	0	2	0	1	0	0	0	1	0	3	0	0	0	1	0	1	0	0	0	6	0
Hdac11_chr6_91156665_91174692_(+)	Hdac11	chr6	91156665	91174692	+	51	0	26	0	28	0	29	0	16	0	23	0	14	0	23	0	21	0	34	0	62	0	27	0	36	0	31	0	73	0
Gm14573_chr6_91158713_91159256_(-)	Gm14573	chr6	91158713	91159256	-	0	0	0	0	0	0	0	0	0	0	0	0	0	0	0	0	0	0	0	0	0	0	0	0	0	0	0	0	0	0
Gm44002_chr6_91173425_91174018_(-)	Gm44002	chr6	91173425	91174018	-	0	0	0	0	0	0	0	0	0	0	0	0	0	0	0	0	0	0	0	0	0	0	0	0	0	0	0	0	0	0
4930402H05Rik_chr6_91207216_91210044_(-)	4930402H05Rik	chr6	91207216	91210044	-	0	0	0	0	0	0	0	0	0	0	0	0	0	0	0	0	0	0	0	0	0	0	0	0	0	0	0	0	0	0
Fbln2_chr6_91212455_91272540_(+)	Fbln2	chr6	91212455	91272540	+	79	0	30	0	38	0	26	0	14	0	29	0	15	0	40	0	21	0	44	0	38	1	36	1	48	0	33	0	49	0
Wnt7a_chr6_91363981_91411363_(-)	Wnt7a	chr6	91363981	91411363	-	6	0	12	0	6	0	2	0	7	0	7	0	4	0	2	0	3	0	0	0	3	0	1	0	4	0	7	0	3	0
Gm30437_chr6_91411513_91412713_(+)	Gm30437	chr6	91411513	91412713	+	0	0	0	0	0	0	0	0	0	0	0	0	0	0	0	0	0	0	0	0	0	0	0	0	0	0	0	0	0	0
4930471M09Rik_chr6_91428308_91440912_(-)	4930471M09Rik	chr6	91428308	91440912	-	9	0	3	0	3	0	2	0	0	0	0	0	1	0	0	0	0	0	5	0	1	0	2	0	3	0	1	0	4	0
Gm4575_chr6_91428883_91429884_(+)	Gm4575	chr6	91428883	91429884	+	0	0	0	0	0	0	0	0	0	0	0	0	0	0	0	0	0	0	0	0	0	0	0	0	0	0	0	0	0	0
1810044D09Rik_chr6_91440987_91441755_(+)	1810044D09Rik	chr6	91440987	91441755	+	2	0	4	0	1	0	0	0	0	0	0	0	0	0	0	0	0	0	0	0	1	0	2	0	2	0	1	0	1	0
Gm44629_chr6_91445027_91446866_(-)	Gm44629	chr6	91445027	91446866	-	0	0	0	0	1	0	0	0	0	0	0	0	0	0	0	0	1	0	0	0	0	0	0	0	0	0	0	0	0	0
Chchd4_chr6_91462172_91473546_(-)	Chchd4	chr6	91462172	91473546	-	366	0	396	1	415	0	196	0	86	1	100	0	118	0	162	0	98	0	318	0	364	0	214	1	270	1	295	0	326	0
Tmem43_chr6_91473703_91488463_(+)	Tmem43	chr6	91473703	91488463	+	111	1	95	0	98	0	46	0	50	0	78	0	44	0	106	1	71	0	118	0	128	0	99	0	124	3	105	0	139	0
Xpc_chr6_91489305_91515888_(-)	Xpc	chr6	91489305	91515888	-	229	0	216	0	216	0	125	0	96	0	122	1	102	0	154	0	130	0	270	0	272	0	200	0	240	0	222	0	243	1
Lsm3_chr6_91515928_91522625_(+)	Lsm3	chr6	91515928	91522625	+	379	1	450	1	386	1	213	0	113	0	153	0	112	0	157	0	104	0	485	0	428	0	450	0	376	0	362	0	435	0
Gm45216_chr6_91522409_91532379_(+)	Gm45216	chr6	91522409	91532379	+	26	0	20	0	32	0	6	0	11	0	11	0	21	0	8	0	14	0	14	0	13	0	18	0	11	0	13	0	13	0
Gm45215_chr6_91594758_91595152_(+)	Gm45215	chr6	91594758	91595152	+	0	0	0	0	0	0	0	0	0	0	0	0	0	0	0	0	0	0	0	0	0	0	0	0	0	0	0	0	0	0
Gm45218_chr6_91599232_91605514_(+)	Gm45218	chr6	91599232	91605514	+	0	0	0	0	0	0	0	0	0	0	0	0	0	0	0	0	0	0	0	0	0	0	0	0	0	0	0	0	0	0
Gm45217_chr6_91678198_91679223_(-)	Gm45217	chr6	91678198	91679223	-	0	0	0	0	1	0	1	0	0	0	0	0	0	0	0	0	0	0	1	0	0	0	1	0	2	0	0	0	1	0
Slc6a6_chr6_91684053_91759066_(+)	Slc6a6	chr6	91684053	91759066	+	718	228	715	270	713	232	571	0	253	128	414	177	277	145	407	251	331	179	507	285	480	256	339	255	438	228	428	252	492	244
4930517G19Rik_chr6_91689933_91691608_(-)	4930517G19Rik	chr6	91689933	91691608	-	0	0	0	0	0	0	0	0	0	0	0	0	0	0	0	0	0	0	0	0	0	0	0	0	0	0	0	0	0	0
Gm45828_chr6_91709406_91711241_(+)	Gm45828	chr6	91709406	91711241	+	11	3	9	1	5	4	12	0	3	4	5	2	2	3	2	3	2	7	3	9	3	5	3	7	2	5	5	5	7	10
Gm44981_chr6_91711336_91713278_(-)	Gm44981	chr6	91711336	91713278	-	0	0	0	0	0	0	1	0	0	0	1	0	0	0	0	0	1	0	0	1	0	0	0	0	0	0	0	0	1	0
Grip2_chr6_91761509_91827250_(-)	Grip2	chr6	91761509	91827250	-	31	4	32	6	37	7	30	0	9	8	15	5	10	6	14	11	11	5	11	10	17	1	16	11	24	16	5	5	12	9
Gm44712_chr6_91876910_91877985_(-)	Gm44712	chr6	91876910	91877985	-	3	0	4	0	2	0	1	0	0	0	0	0	1	0	1	0	0	0	3	0	3	0	2	0	1	0	0	0	2	0
Ccdc174_chr6_91878053_91899843_(+)	Ccdc174	chr6	91878053	91899843	+	125	78	110	89	112	92	114	0	25	22	32	44	35	29	41	44	22	22	83	105	69	96	59	68	56	96	69	74	68	93
4930590J08Rik_chr6_91902809_91950725_(+)	4930590J08Rik	chr6	91902809	91950725	+	20	7	14	9	13	9	8	0	8	4	10	10	14	7	9	10	4	12	6	7	8	13	12	15	17	16	9	9	11	6
Gm44711_chr6_91938250_91939513_(-)	Gm44711	chr6	91938250	91939513	-	0	0	0	0	0	0	0	0	0	0	0	0	0	0	0	0	0	0	0	0	0	0	0	0	0	0	0	0	0	0
Fgd5_chr6_91978878_92076004_(+)	Fgd5	chr6	91978878	92076004	+	75	22	51	22	46	14	46	0	24	20	35	18	22	14	37	27	19	20	6	16	31	42	25	35	43	30	12	20	51	27
Gm44095_chr6_92007550_92009480_(+)	Gm44095	chr6	92007550	92009480	+	0	0	1	0	2	0	1	0	2	0	0	0	0	1	1	0	0	1	0	0	0	0	1	0	0	0	1	0	1	1
4930466I24Rik_chr6_92012394_92016117_(-)	4930466I24Rik	chr6	92012394	92016117	-	0	0	0	0	0	0	0	0	0	0	0	0	0	0	0	0	0	0	0	0	0	0	0	0	0	0	0	0	0	0
Nr2c2_chr6_92091390_92174294_(+)	Nr2c2	chr6	92091390	92174294	+	327	96	355	91	369	110	236	1	122	50	163	83	141	76	162	80	117	52	257	133	190	97	155	127	210	121	204	99	211	106
Gm44249_chr6_92144489_92146293_(-)	Gm44249	chr6	92144489	92146293	-	0	0	0	0	1	0	0	0	1	1	0	0	0	1	0	1	0	0	0	0	0	0	0	0	0	0	0	0	0	0
Mrps25_chr6_92169525_92184033_(-)	Mrps25	chr6	92169525	92184033	-	137	35	138	30	135	22	89	0	31	9	32	9	43	14	30	14	32	10	110	37	89	38	99	30	91	32	82	35	146	32
Rbsn_chr6_92186712_92214925_(-)	Rbsn	chr6	92186712	92214925	-	264	115	254	99	229	83	233	0	50	31	69	49	54	38	83	66	52	35	150	102	140	118	94	100	116	96	127	91	164	109
Trh_chr6_92242061_92244650_(-)	Trh	chr6	92242061	92244650	-	765	321	747	313	668	277	650	2	136	80	235	139	106	106	100	116	127	98	172	280	181	227	95	381	280	209	114	202	160	274
Gm44803_chr6_92271417_92271572_(-)	Gm44803	chr6	92271417	92271572	-	0	0	0	0	0	0	0	0	0	0	0	0	0	0	0	0	0	0	0	0	0	0	0	0	0	0	0	0	0	0
Gm44024_chr6_92280918_92281393_(-)	Gm44024	chr6	92280918	92281393	-	0	0	0	0	0	0	0	0	0	0	0	0	0	0	1	0	0	0	0	0	0	0	0	0	0	0	0	0	0	0
Prickle2_chr6_92370908_92706155_(-)	Prickle2	chr6	92370908	92706155	-	164	45	163	23	142	36	138	1	36	45	86	56	67	41	76	43	59	39	56	61	59	52	63	66	97	82	68	54	74	57
Gm17797_chr6_92561777_92562773_(+)	Gm17797	chr6	92561777	92562773	+	0	0	0	0	0	0	0	0	0	0	0	0	0	0	0	0	0	0	0	0	0	0	0	0	0	0	0	0	0	0
Adamts9_chr6_92772699_92943492_(-)	Adamts9	chr6	92772699	92943492	-	348	120	434	120	387	100	217	0	106	68	205	109	134	110	192	149	151	107	265	202	151	135	154	97	217	150	212	146	177	123
A730049H05Rik_chr6_92816478_92847174_(+)	A730049H05Rik	chr6	92816478	92847174	+	25	6	36	4	33	7	13	0	7	2	20	3	7	0	9	4	13	1	22	12	12	8	7	5	12	9	11	5	12	7
Gm15737_chr6_92869357_92884411_(+)	Gm15737	chr6	92869357	92884411	+	0	0	0	0	2	0	0	0	0	0	0	0	0	0	0	0	0	0	0	0	0	0	1	0	0	0	0	0	0	0
9530026P05Rik_chr6_92940329_93272979_(+)	9530026P05Rik	chr6	92940329	93272979	+	65	24	60	25	40	9	40	0	32	17	56	28	43	14	47	38	25	23	33	25	61	34	22	26	39	31	24	27	52	33
Gm44224_chr6_93079108_93080570_(+)	Gm44224	chr6	93079108	93080570	+	0	0	0	0	0	0	0	0	0	0	0	0	0	0	0	0	0	0	0	1	0	0	0	0	0	0	0	0	0	0
Gm5313_chr6_93137004_93137990_(-)	Gm5313	chr6	93137004	93137990	-	1	0	0	0	0	0	1	0	0	1	2	0	0	0	1	2	0	1	1	1	0	0	0	0	0	0	0	0	0	1
Gm43923_chr6_93194941_93197851_(+)	Gm43923	chr6	93194941	93197851	+	1	0	0	1	1	0	0	0	0	0	0	0	0	0	0	0	0	0	0	0	0	0	0	0	0	0	0	0	0	1
Gm44220_chr6_93241720_93244206_(+)	Gm44220	chr6	93241720	93244206	+	1	1	0	0	0	0	0	0	0	0	0	0	2	0	0	0	0	0	0	0	0	0	0	0	0	0	0	0	2	0
Gm25094_chr6_93335458_93335588_(-)	Gm25094	chr6	93335458	93335588	-	0	0	0	0	0	0	0	0	0	0	0	0	0	0	0	0	0	0	0	0	0	0	0	0	0	0	0	0	0	0
Gm44181_chr6_93455075_93455557_(-)	Gm44181	chr6	93455075	93455557	-	0	0	0	0	0	0	0	0	0	0	0	0	0	0	1	0	0	0	0	0	0	0	0	0	1	0	0	0	0	0
Gm22312_chr6_93509573_93509702_(+)	Gm22312	chr6	93509573	93509702	+	0	0	0	0	0	0	0	0	0	0	0	0	0	0	0	0	0	0	0	0	0	0	0	0	0	0	0	0	0	0
Gm7812_chr6_93649352_93650225_(-)	Gm7812	chr6	93649352	93650225	-	0	0	0	0	0	0	0	0	0	0	0	0	0	0	0	0	0	0	0	0	0	0	0	0	0	0	0	0	0	0
Magi1_chr6_93675455_94283917_(-)	Magi1	chr6	93675455	94283917	-	3034	930	3030	997	2745	924	1549	3	1354	817	2163	1193	1643	1133	1747	1307	1357	888	1811	1311	1316	909	1482	1323	1895	1425	1487	1206	1399	1051
Gm23035_chr6_93793772_93793877_(+)	Gm23035	chr6	93793772	93793877	+	0	0	0	0	0	0	0	0	0	0	0	0	0	0	0	0	0	0	0	0	0	0	0	0	0	0	0	0	0	0
Gm22840_chr6_93890615_93890750_(+)	Gm22840	chr6	93890615	93890750	+	0	0	0	0	0	0	0	0	0	0	0	0	0	0	0	0	0	0	0	0	0	0	0	0	0	0	0	0	0	0
Gm44307_chr6_94323271_94324034_(-)	Gm44307	chr6	94323271	94324034	-	0	0	0	0	0	0	0	0	0	0	0	0	0	0	0	0	0	0	0	0	0	0	0	0	0	0	0	0	0	0
Gm19908_chr6_94349534_94349924_(+)	Gm19908	chr6	94349534	94349924	+	0	0	0	0	0	0	0	0	0	0	0	0	0	0	0	0	0	0	0	0	0	0	0	0	0	0	0	0	0	0
Gm7825_chr6_94417829_94418244_(+)	Gm7825	chr6	94417829	94418244	+	0	0	0	0	0	0	0	0	0	0	0	0	0	0	0	0	0	0	0	0	0	0	0	0	0	0	0	0	0	0
Gm44315_chr6_94484180_94484398_(-)	Gm44315	chr6	94484180	94484398	-	0	0	0	0	0	0	0	0	0	0	0	0	0	0	0	0	0	0	0	0	0	0	0	0	0	0	0	0	0	0
Slc25a26_chr6_94500331_94604672_(+)	Slc25a26	chr6	94500331	94604672	+	364	141	384	135	418	128	276	0	92	77	185	84	148	74	146	102	132	75	274	179	196	107	213	139	216	146	203	150	205	168
Lrig1_chr6_94604529_94700158_(-)	Lrig1	chr6	94604529	94700158	-	143	44	152	44	158	39	152	0	48	21	71	30	35	33	70	45	72	39	101	71	81	67	49	42	104	56	69	40	102	70
Mir7041_chr6_94606364_94606415_(-)	Mir7041	chr6	94606364	94606415	-	0	0	0	0	0	0	0	0	0	0	0	0	0	0	0	0	0	0	0	0	0	0	0	0	0	0	0	0	0	0
Gm43997_chr6_94799432_94800436_(+)	Gm43997	chr6	94799432	94800436	+	0	0	0	0	0	0	0	0	0	0	0	0	0	0	0	0	0	0	0	0	0	0	0	0	0	0	0	0	0	0
Gm7833_chr6_94820530_94821519_(+)	Gm7833	chr6	94820530	94821519	+	0	0	0	0	0	1	0	0	0	0	0	0	0	0	0	1	0	0	1	0	0	0	0	0	0	0	0	1	0	0
Gm23364_chr6_94823733_94823805_(+)	Gm23364	chr6	94823733	94823805	+	0	0	0	0	0	0	0	0	0	0	0	0	0	0	0	0	0	0	0	0	0	0	0	0	0	0	0	0	0	0
Gm24601_chr6_94826781_94826923_(-)	Gm24601	chr6	94826781	94826923	-	0	0	0	0	0	0	0	0	0	0	0	0	0	0	0	0	0	0	0	0	0	0	1	0	1	0	0	0	0	0
Gm44100_chr6_94848398_94848833_(-)	Gm44100	chr6	94848398	94848833	-	0	0	0	0	0	0	0	0	0	0	0	0	0	0	0	0	0	0	0	0	0	0	0	0	0	0	0	0	0	0
4930511E03Rik_chr6_94943834_94951545_(+)	4930511E03Rik	chr6	94943834	94951545	+	1	0	0	0	0	0	0	0	0	0	0	0	0	0	0	0	0	0	0	0	0	0	0	0	0	0	0	0	1	0
Gm26501_chr6_95100201_95100307_(-)	Gm26501	chr6	95100201	95100307	-	0	0	0	0	0	0	0	0	0	0	0	0	0	0	0	0	0	0	0	0	0	0	0	0	0	0	0	0	0	0
Kbtbd8os_chr6_95114017_95117631_(-)	Kbtbd8os	chr6	95114017	95117631	-	0	0	0	0	1	0	0	0	0	0	0	0	0	0	0	0	0	0	1	0	0	0	0	0	0	1	0	0	0	0
Kbtbd8_chr6_95117240_95129790_(+)	Kbtbd8	chr6	95117240	95129790	+	85	47	109	47	79	58	76	0	8	8	18	13	17	28	9	9	12	17	49	61	52	45	25	39	36	36	42	53	51	51
Gm17822_chr6_95240228_95240578_(-)	Gm17822	chr6	95240228	95240578	-	0	0	0	0	0	0	0	0	0	0	0	0	0	0	0	0	0	0	0	0	0	0	0	0	0	0	0	0	0	0
Gm5723_chr6_95250301_95254515_(+)	Gm5723	chr6	95250301	95254515	+	0	0	0	0	0	0	1	0	0	0	0	0	0	0	0	1	0	0	0	0	0	0	0	0	0	0	0	0	0	0
AY512915_chr6_95255726_95333993_(-)	AY512915	chr6	95255726	95333993	-	4	0	0	0	0	0	2	0	0	0	0	0	0	0	1	0	0	0	2	2	0	0	0	0	0	0	0	0	1	0
Gm10234_chr6_95322112_95322210_(+)	Gm10234	chr6	95322112	95322210	+	0	0	0	0	0	0	0	0	0	0	0	0	0	0	0	0	0	0	0	0	0	0	0	0	0	0	0	0	0	0
Suclg2_chr6_95473009_95718800_(-)	Suclg2	chr6	95473009	95718800	-	1517	346	1786	367	1645	320	1017	0	424	143	701	214	611	179	701	278	535	171	1051	416	913	329	798	370	952	381	872	330	857	362
Gm7838_chr6_95925741_95926929_(-)	Gm7838	chr6	95925741	95926929	-	0	0	0	0	0	0	0	0	0	0	0	0	0	0	0	0	0	0	0	0	0	0	0	0	0	0	0	0	0	0
Gm5881_chr6_96033003_96033369_(-)	Gm5881	chr6	96033003	96033369	-	0	0	0	0	1	0	0	0	0	0	0	0	0	0	0	0	0	0	0	0	0	0	0	0	0	0	0	0	1	0
Tafa1_chr6_96113154_96657198_(+)	Tafa1	chr6	96113154	96657198	+	11	0	11	0	14	2	12	0	0	0	3	1	0	0	0	0	1	0	4	2	0	1	1	1	2	0	2	0	2	0
1700123L14Rik_chr6_96164497_96166243_(-)	1700123L14Rik	chr6	96164497	96166243	-	0	0	0	0	0	0	0	0	0	0	0	0	0	0	0	0	0	0	0	0	0	0	0	0	0	0	0	0	0	0
Gm22971_chr6_96469435_96469531_(-)	Gm22971	chr6	96469435	96469531	-	0	0	0	0	0	0	0	0	0	0	0	0	0	0	0	0	0	0	0	0	0	0	0	0	0	0	0	0	0	0
Gm26011_chr6_96560761_96560864_(-)	Gm26011	chr6	96560761	96560864	-	0	0	0	0	0	0	0	0	0	0	0	0	0	0	0	0	0	0	0	0	0	0	0	0	0	0	0	0	0	0
Tafa4_chr6_96831203_97060413_(-)	Tafa4	chr6	96831203	97060413	-	94	7	61	6	76	12	69	0	18	3	35	13	31	8	40	23	8	12	29	19	43	16	45	27	49	19	22	14	37	29
Eogt_chr6_97110024_97149182_(-)	Eogt	chr6	97110024	97149182	-	110	28	104	19	74	30	66	0	39	10	26	14	25	12	41	19	26	19	29	20	28	14	23	17	32	19	22	14	32	17
Gm44065_chr6_97148194_97151720_(+)	Gm44065	chr6	97148194	97151720	+	0	0	2	0	0	0	0	0	0	0	0	0	0	0	0	0	0	0	0	0	0	0	0	0	0	1	1	0	0	0
Tmf1_chr6_97152997_97179122_(-)	Tmf1	chr6	97152997	97179122	-	180	40	209	54	202	50	109	0	49	29	56	22	53	27	92	41	48	22	103	47	122	57	70	47	86	49	79	49	110	44
Gm26175_chr6_97162817_97162947_(-)	Gm26175	chr6	97162817	97162947	-	0	0	0	0	0	0	0	0	0	0	0	0	0	0	0	0	0	0	0	0	0	0	0	0	0	0	0	0	0	0
Uba3_chr6_97183670_97205647_(-)	Uba3	chr6	97183670	97205647	-	546	246	609	270	503	232	391	0	83	91	151	135	124	139	159	157	116	110	299	283	309	284	186	232	305	285	242	221	283	273
Arl6ip5_chr6_97210689_97233315_(+)	Arl6ip5	chr6	97210689	97233315	+	127	40	120	25	95	23	68	1	19	8	19	13	19	16	26	25	20	15	28	23	45	17	34	21	45	38	24	25	26	29
Lmod3_chr6_97238534_97252759_(-)	Lmod3	chr6	97238534	97252759	-	0	0	0	0	0	0	0	0	0	0	0	0	0	0	0	0	0	0	0	0	0	0	0	0	0	0	3	0	0	0
Frmd4b_chr6_97286867_97617541_(-)	Frmd4b	chr6	97286867	97617541	-	417	46	406	31	513	27	135	0	105	23	204	42	125	20	82	34	98	24	30	26	51	23	68	43	101	37	30	23	36	21
Gm19653_chr6_97449750_97451486_(+)	Gm19653	chr6	97449750	97451486	+	0	0	0	0	0	0	0	0	0	0	0	0	0	0	0	0	0	0	0	0	0	0	0	0	0	0	0	0	0	0
Gm25852_chr6_97547438_97547567_(-)	Gm25852	chr6	97547438	97547567	-	0	0	0	0	0	0	0	0	0	0	0	0	0	0	0	0	0	0	0	0	0	0	0	0	0	0	0	0	0	0
Gm23510_chr6_97572076_97572238_(-)	Gm23510	chr6	97572076	97572238	-	0	0	0	0	0	0	0	0	0	0	0	0	0	0	0	0	0	0	0	0	0	0	0	0	0	0	0	0	0	0
Gm44102_chr6_97579427_97581092_(-)	Gm44102	chr6	97579427	97581092	-	0	0	1	0	0	0	0	0	0	0	0	0	0	0	1	0	0	0	1	0	0	0	0	0	0	0	0	0	0	0
Gm24565_chr6_97730439_97730545_(+)	Gm24565	chr6	97730439	97730545	+	0	0	0	0	0	0	0	0	0	0	0	0	0	0	0	0	0	0	0	0	0	0	0	0	0	0	0	0	0	0
Gm23703_chr6_97790512_97790654_(+)	Gm23703	chr6	97790512	97790654	+	0	0	0	0	0	0	0	0	0	0	0	0	0	0	0	0	0	0	0	0	0	0	0	0	0	0	0	0	0	0
Mitf_chr6_97807052_98021349_(+)	Mitf	chr6	97807052	98021349	+	190	53	153	43	124	27	131	0	42	28	89	47	58	35	70	56	61	42	115	89	105	68	81	71	81	58	120	73	134	84
Gm15531_chr6_97890288_97890539_(-)	Gm15531	chr6	97890288	97890539	-	0	0	0	0	0	0	0	0	0	0	0	0	0	0	0	0	0	0	0	1	0	0	0	0	0	0	0	0	0	0
Gm32592_chr6_98121796_98248611_(+)	Gm32592	chr6	98121796	98248611	+	0	0	0	0	0	0	0	0	0	0	0	0	0	0	0	0	0	0	0	0	0	0	0	0	0	0	0	0	0	0
Gm765_chr6_98235708_98342754_(-)	Gm765	chr6	98235708	98342754	-	0	0	0	0	0	0	0	0	0	0	0	0	0	0	0	0	0	0	1	0	0	0	0	0	0	0	0	0	0	0
Gm44196_chr6_98507726_98697674_(-)	Gm44196	chr6	98507726	98697674	-	1	1	2	0	0	0	2	0	0	0	0	0	0	2	0	0	0	0	0	1	0	1	0	1	0	1	2	0	0	1
4930595L18Rik_chr6_98535246_98552107_(-)	4930595L18Rik	chr6	98535246	98552107	-	0	0	0	0	0	0	0	0	0	0	0	0	0	0	0	0	0	0	0	0	0	0	0	0	0	0	0	0	0	0
Gm32308_chr6_98757749_98758028_(+)	Gm32308	chr6	98757749	98758028	+	0	0	0	0	0	0	0	0	0	0	0	0	0	0	0	0	0	0	0	0	0	0	0	0	0	0	0	0	0	0
Gm32381_chr6_98860340_98860815_(-)	Gm32381	chr6	98860340	98860815	-	0	0	0	0	0	0	0	0	0	0	0	0	0	0	0	1	0	0	0	0	0	0	0	0	0	0	0	0	0	0
Foxp1_chr6_98925338_99522721_(-)	Foxp1	chr6	98925338	99522721	-	850	320	843	309	919	371	539	1	234	145	322	192	274	202	287	260	242	180	321	249	303	218	336	364	437	326	218	192	226	232
Gm49348_chr6_99075911_99076057_(-)	Gm49348	chr6	99075911	99076057	-	0	0	0	0	0	0	0	0	0	0	0	0	0	0	0	0	0	0	0	0	0	0	0	0	0	0	0	0	0	0
Gm20696_chr6_99257484_99666797_(-)	Gm20696	chr6	99257484	99666797	-	36	32	26	25	24	30	23	0	5	24	14	33	7	21	17	20	12	16	5	14	7	17	12	35	8	21	3	11	5	17
Gm20705_chr6_99384607_99388499_(-)	Gm20705	chr6	99384607	99388499	-	1	0	1	1	0	0	0	0	0	0	0	0	0	0	0	0	0	0	0	1	0	1	0	1	1	3	0	0	0	1
Gm22328_chr6_99484591_99484702_(-)	Gm22328	chr6	99484591	99484702	-	0	0	0	0	0	1	0	0	0	0	0	1	0	0	0	0	0	0	0	0	0	0	0	0	0	0	0	0	0	0
Gm24936_chr6_99575891_99576137_(+)	Gm24936	chr6	99575891	99576137	+	0	0	0	0	0	0	0	0	0	0	0	0	0	0	0	0	0	0	0	0	0	0	0	0	0	0	0	0	0	0
Eif4e3_chr6_99625135_99666771_(-)	Eif4e3	chr6	99625135	99666771	-	7	11	6	4	4	2	8	0	0	7	1	5	0	6	0	6	0	2	0	2	0	0	1	4	2	3	0	2	0	6
[truncated: 1,130 more rows]

## Sheet: Chr6 Xist Silenced Genes
id	gene	chr	start	end	strand	empty1_B6_total	empty1_cast_total	empty2_B6_total	empty2_cast_total	empty3_B6_total	empty3_cast_total	empty4_B6_total	empty4_cast_total	parent_B6_total	parent_cast_total	wt20_B6_total	wt20_cast_total	wt44_B6_total	wt44_cast_total	dko13_B6_total	dko13_cast_total	dko4_B6_total	dko4_cast_total	dko13-egfp-rep1_B6_total	dko13-egfp-rep1_cast_total	dko13-egfp-rep2_B6_total	dko13-egfp-rep2_cast_total	dko13-fl-safb-rep1_B6_total	dko13-fl-safb-rep1_cast_total	dko13-fl-safb-rep2_B6_total	dko13-fl-safb-rep2_cast_total	dko13-safb-dd3∆-rep1_B6_total	dko13-safb-dd3∆-rep1_cast_total	dko13-safb-dd3∆-rep2_B6_total	dko13-safb-dd3∆-rep2_cast_total	empty1_B6_total RPM	empty1_cast_total RPM	empty2_B6_total RPM	empty2_cast_total RPM	empty3_B6_total RPM	empty3_cast_total RPM	empty4_B6_total RPM	empty4_cast_total RPM	parent_B6_total RPM	parent_cast_total RPM	wt20_B6_total RPM	wt20_cast_total RPM	wt44_B6_total RPM	wt44_cast_total RPM
1110019D14Rik_chr6_13871526_14044385_(+)	1110019D14Rik	chr6	13871526	14044385	+	228	27	199	25	204	24	248	19	47	16	98	24	89	23	76	28	50	23	232	59	169	81	142	42	122	63	196	38	177	52	42.035	4.94909	36.9406	4.61275	40.1052	4.69201	50.1533	7.71111	19.0009	4.96731	30.291	7.89585	29.1404	5.67338
4933406J09Rik_chr6_134308951_134403415_(-)	4933406J09Rik	chr6	134308951	134403415	-	137	5	95	5	90	0	240	9	43	4	81	4	45	0	97	8	71	2	184	12	241	9	97	5	141	8	170	8	271	17	25.2578	0.916499	17.635	0.92255	17.6935	0	48.5354	3.65263	17.3838	1.24183	25.0364	1.31598	14.7339	0
9530026P05Rik_chr6_92940329_93272979_(+)	9530026P05Rik	chr6	92940329	93272979	+	65	24	60	25	40	9	40	0	32	17	56	28	43	14	47	38	25	23	33	25	61	34	22	26	39	31	24	27	52	33	11.9836	4.39919	11.1379	4.61275	7.86376	1.7595	8.08924	0	12.9368	5.27776	17.3091	9.21183	14.0791	3.45336
9530062K07Rik_chr6_116199408_116207993_(-)	9530062K07Rik	chr6	116199408	116207993	-	17	4	28	2	6	1	14	3	0	0	0	0	2	0	2	5	2	3	15	6	9	6	2	1	6	8	6	3	11	4	3.13419	0.733199	5.19768	0.36902	1.17956	0.1955	2.83123	1.21754	0	0	0	0	0.65484	0
Abcg2_chr6_58584523_58695676_(+)	Abcg2	chr6	58584523	58695676	+	558	255	668	304	633	308	417	233	159	170	283	242	269	267	153	198	129	159	195	239	200	208	195	303	269	305	201	221	182	213	102.875	46.7414	124.002	56.091	124.444	60.2141	84.3303	94.5626	64.2795	52.7776	87.473	79.6165	88.076	65.8606
Adamts9_chr6_92772699_92943492_(-)	Adamts9	chr6	92772699	92943492	-	348	120	434	120	387	100	217	0	106	68	205	109	134	110	192	149	151	107	265	202	151	135	154	97	217	150	212	146	177	123	64.1586	21.996	80.564	22.1412	76.0818	19.55	43.8841	0	42.853	21.1111	63.3638	35.8603	43.8743	27.1336
Adcyap1r1_chr6_55451978_55501451_(+)	Adcyap1r1	chr6	55451978	55501451	+	20	11	19	9	18	12	26	9	4	4	14	5	5	5	8	3	11	5	12	8	8	7	14	13	14	5	7	4	6	9	3.68728	2.0163	3.527	1.66059	3.53869	2.346	5.258	3.65263	1.61709	1.24183	4.32728	1.64497	1.6371	1.23334
Adipor2_chr6_119353150_119417704_(-)	Adipor2	chr6	119353150	119417704	-	383	122	537	135	500	115	435	118	305	108	452	170	291	157	488	214	368	130	490	173	551	229	382	183	524	220	453	173	542	262	70.6114	22.3626	99.684	24.9088	98.297	22.4825	87.9704	47.8901	123.303	33.5293	139.709	55.929	95.2792	38.727
Aebp2_chr6_140622663_140678472_(+)	Aebp2	chr6	140622663	140678472	+	566	22	578	23	584	19	579	35	241	13	342	20	244	28	484	32	281	37	714	46	606	32	413	37	508	48	652	42	633	29	104.35	4.03259	107.295	4.24373	114.811	3.71451	117.092	14.2047	97.43	4.03594	105.709	6.57988	79.8905	6.90673
Ahcyl2_chr6_29768011_29912310_(+)	Ahcyl2	chr6	29768011	29912310	+	269	121	262	108	289	129	226	89	144	83	237	111	179	106	215	130	185	98	363	249	350	180	314	186	280	181	350	191	401	184	49.5939	22.1793	48.6354	19.9271	56.8156	25.2196	45.7042	36.1205	58.2154	25.7679	73.2548	36.5183	58.6082	26.1469
Akr1b3_chr6_34302434_34317478_(-)	Akr1b3	chr6	34302434	34317478	-	635	319	503	227	557	245	469	239	77	67	82	85	79	96	89	88	76	62	366	261	259	224	248	253	214	254	279	219	291	262	117.071	58.4726	93.3726	41.8838	109.503	47.8976	94.8463	96.9977	31.1291	20.8006	25.3455	27.9645	25.8662	23.6802
Alms1_chr6_85587531_85702753_(+)	Alms1	chr6	85587531	85702753	+	402	112	441	108	350	116	304	0	90	48	151	67	142	101	162	108	122	72	256	156	310	142	193	128	218	149	245	140	297	155	74.1143	20.5296	81.8634	19.9271	68.8079	22.678	61.4782	0	36.3846	14.9019	46.6729	22.0426	46.4936	24.9136
Ankrd26_chr6_118501308_118562226_(-)	Ankrd26	chr6	118501308	118562226	-	311	112	338	118	247	105	321	103	55	40	97	62	76	68	131	99	91	67	268	227	234	176	153	158	182	167	232	188	250	204	57.3372	20.5296	62.7434	21.7722	48.5587	20.5275	64.9161	41.8024	22.2351	12.4183	29.9819	20.3976	24.8839	16.7735
Arl6ip5_chr6_97210689_97233315_(+)	Arl6ip5	chr6	97210689	97233315	+	127	40	120	25	95	23	68	1	19	8	19	13	19	16	26	25	20	15	28	23	45	17	34	21	45	38	24	25	26	29	23.4142	7.33199	22.2758	4.61275	18.6764	4.49651	13.7517	0.405848	7.6812	2.48365	5.87274	4.27692	6.22098	3.9467
Atg7_chr6_114643097_114860614_(+)	Atg7	chr6	114643097	114860614	+	254	186	229	168	176	153	199	146	65	82	94	99	61	108	86	149	62	110	105	200	109	140	91	181	115	203	90	155	88	172	46.8284	34.0937	42.5096	30.9977	34.6005	29.9116	40.2439	59.2538	26.2778	25.4574	29.0546	32.5704	19.9726	26.6402
Atp2b2_chr6_113743831_114042613_(-)	Atp2b2	chr6	113743831	114042613	-	40	7	16	15	7	10	21	14	6	8	17	17	9	5	21	28	12	24	6	8	15	25	6	14	11	18	2	17	7	19	7.37455	1.2831	2.9701	2.76765	1.37616	1.955	4.24685	5.68187	2.42564	2.48365	5.25456	5.5929	2.94678	1.23334
Avl9_chr6_56714899_56761912_(+)	Avl9	chr6	56714899	56761912	+	280	59	304	66	302	62	236	41	70	32	115	42	94	35	130	39	76	20	221	76	225	64	181	61	199	82	180	56	230	76	51.6219	10.8147	56.4319	12.1777	59.3714	12.121	47.7265	16.6398	28.2992	9.93461	35.5456	13.8177	30.7775	8.63341
B4galnt3_chr6_120203073_120294559_(-)	B4galnt3	chr6	120203073	120294559	-	224	167	404	250	407	295	338	288	155	224	286	307	212	269	390	535	259	350	498	672	444	492	333	513	372	540	510	603	455	557	41.2975	30.6111	74.9951	46.1275	80.0137	57.6726	68.354	116.884	62.6624	69.5423	88.4002	101.001	69.413	66.3539
Bcl2l13_chr6_120836212_120892842_(+)	Bcl2l13	chr6	120836212	120892842	+	301	180	259	153	249	173	227	134	107	79	148	112	110	121	151	117	130	94	195	171	185	161	162	174	190	196	178	131	201	191	55.4935	32.9939	48.0785	28.23	48.9519	33.8216	45.9064	54.3837	43.2573	24.5261	45.7456	36.8473	36.0162	29.8469
Bicd1_chr6_149408886_149563329_(+)	Bicd1	chr6	149408886	149563329	+	169	67	145	52	142	52	142	53	49	35	68	52	52	33	41	30	30	22	93	55	57	49	83	84	78	79	89	50	66	44	31.1575	12.2811	26.9165	9.59452	27.9163	10.166	28.7168	21.51	19.8094	10.866	21.0182	17.1077	17.0258	8.14007
Bid_chr6_120891930_120916853_(-)	Bid	chr6	120891930	120916853	-	284	147	275	148	277	140	296	142	80	57	118	87	88	100	194	141	105	86	156	117	196	129	158	170	171	174	186	113	210	138	52.3593	26.9451	51.0486	27.3075	54.4565	27.3701	59.8603	57.6304	32.3419	17.696	36.4728	28.6225	28.813	24.6669
Bms1_chr6_118383381_118419474_(-)	Bms1	chr6	118383381	118419474	-	772	238	641	198	623	178	642	176	153	68	225	76	200	61	277	122	210	91	571	229	512	197	507	204	443	197	511	174	555	183	142.329	43.6253	118.99	36.533	122.478	34.7991	129.832	71.4293	61.8539	21.1111	69.5457	25.0035	65.484	15.0468
Bola3_chr6_83349147_83360136_(+)	Bola3	chr6	83349147	83360136	+	44	46	26	40	34	17	34	0	10	10	3	14	6	12	15	19	11	14	11	26	17	30	10	35	22	31	16	23	19	31	8.11201	8.43179	4.82641	7.3804	6.68419	3.32351	6.87585	0	4.04274	3.10457	0.927275	4.60591	1.96452	2.96003
Borcs5_chr6_134639510_134711187_(+)	Borcs5	chr6	134639510	134711187	+	81	21	84	19	90	14	98	20	29	11	64	19	46	22	59	22	60	13	89	27	101	35	76	28	72	38	69	16	79	31	14.9335	3.84929	15.593	3.50569	17.6935	2.73701	19.8186	8.11696	11.7239	3.41502	19.7819	6.25088	15.0613	5.42671
Bpgm_chr6_34476207_34505613_(+)	Bpgm	chr6	34476207	34505613	+	84	22	78	20	92	22	84	19	16	6	28	9	15	6	35	12	23	7	48	17	41	13	47	24	56	25	51	17	68	20	15.4866	4.03259	14.4792	3.6902	18.0866	4.30101	16.9874	7.71111	6.46838	1.86274	8.65457	2.96094	4.9113	1.48001
Braf_chr6_39603237_39725463_(-)	Braf	chr6	39603237	39725463	-	770	503	910	538	920	497	741	378	203	224	329	344	283	308	289	395	205	272	524	601	501	623	371	551	443	622	435	549	498	655	141.96	92.1998	168.925	99.2663	180.866	97.1637	149.853	153.411	82.0676	69.5423	101.691	113.174	92.6599	75.974
Brk1_chr6_113604772_113616951_(+)	Brk1	chr6	113604772	113616951	+	370	7	349	12	337	12	345	7	96	4	130	5	107	8	121	9	90	4	288	10	250	8	224	5	239	5	242	10	263	8	68.2146	1.2831	64.7853	2.21412	66.2522	2.346	69.7697	2.84094	38.8103	1.24183	40.1819	1.64497	35.0339	1.97335
Brpf1_chr6_113307137_113324860_(+)	Brpf1	chr6	113307137	113324860	+	124	52	113	49	114	31	107	39	26	21	42	23	28	19	41	35	29	20	55	55	46	46	32	53	44	43	35	49	40	35	22.8611	9.53159	20.9763	9.04099	22.4117	6.06051	21.6387	15.8281	10.5111	6.51959	12.9819	7.56686	9.16776	4.68671
C1galt1_chr6_7844842_7875687_(+)	C1galt1	chr6	7844842	7875687	+	169	227	162	283	160	224	175	317	41	87	51	131	40	107	32	165	35	86	92	258	88	228	60	256	58	272	79	230	80	271	31.1575	41.609	30.0723	52.2163	31.455	43.7921	35.3904	128.654	16.5752	27.0097	15.7637	43.0982	13.0968	26.3936
Cadps2_chr6_23262773_23839421_(-)	Cadps2	chr6	23262773	23839421	-	151	47	182	69	300	76	258	48	52	26	87	36	59	41	13	10	13	17	18	15	14	5	51	31	35	28	23	21	18	9	27.8389	8.61509	33.7849	12.7312	58.9782	14.858	52.1756	19.4807	21.0222	8.07187	26.891	11.8438	19.3178	10.1134
Caprin2_chr6_148842492_148896237_(-)	Caprin2	chr6	148842492	148896237	-	167	86	142	85	175	89	167	79	61	47	91	55	58	61	124	96	76	63	133	107	116	104	95	104	112	125	116	109	103	125	30.7888	15.7638	26.3596	15.6833	34.4039	17.3995	33.7726	32.062	24.6607	14.5915	28.1274	18.0947	18.9904	15.0468
Capza2_chr6_17636234_17666972_(+)	Capza2	chr6	17636234	17666972	+	181	196	198	206	149	181	188	193	23	53	44	80	25	66	46	93	42	65	119	219	107	186	72	171	69	179	87	165	92	175	33.3699	35.9267	36.755	38.009	29.2925	35.3856	38.0194	78.3287	9.29829	16.4542	13.6	26.3195	8.1855	16.2801
Casp2_chr6_42264985_42282508_(+)	Casp2	chr6	42264985	42282508	+	303	79	301	88	242	73	273	64	48	24	76	53	72	36	95	34	82	25	143	65	139	69	89	63	137	65	117	45	131	72	55.8622	14.4807	55.875	16.2369	47.5757	14.2715	55.209	25.9743	19.4051	7.45096	23.491	17.4367	23.5742	8.88008
Ccdc174_chr6_91878053_91899843_(+)	Ccdc174	chr6	91878053	91899843	+	125	78	110	89	112	92	114	0	25	22	32	44	35	29	41	44	22	22	83	105	69	96	59	68	56	96	69	74	68	93	23.0455	14.2974	20.4194	16.4214	22.0185	17.986	23.0543	0	10.1068	6.83005	9.89094	14.4757	11.4597	7.1534
Ccdc77_chr6_120324323_120364374_(-)	Ccdc77	chr6	120324323	120364374	-	176	128	229	142	210	157	267	164	71	64	122	111	85	110	141	180	105	121	290	241	290	237	146	184	203	206	230	235	308	238	32.448	23.4624	42.5096	26.2004	41.2847	30.6936	53.9957	66.5591	28.7034	19.8692	37.7092	36.5183	27.8307	27.1336
Ccdc91_chr6_147475828_147632612_(+)	Ccdc91	chr6	147475828	147632612	+	216	8	248	10	227	11	180	15	71	6	128	5	84	8	123	15	82	3	191	8	179	8	169	10	190	13	176	10	169	16	39.8226	1.4664	46.0366	1.8451	44.6268	2.1505	36.4016	6.08772	28.7034	1.86274	39.5637	1.64497	27.5033	1.97335
Cecr2_chr6_120666369_120771190_(+)	Cecr2	chr6	120666369	120771190	+	952	466	1231	455	967	388	1019	354	327	234	527	363	408	383	487	381	377	319	430	377	449	345	465	430	450	436	487	346	490	387	175.514	85.4177	228.512	83.952	190.106	75.8542	206.073	143.67	132.197	72.6469	162.891	119.425	133.587	94.4742
Chmp3_chr6_71543797_71582609_(+)	Chmp3	chr6	71543797	71582609	+	256	150	337	189	237	149	227	0	33	57	76	76	61	85	57	72	50	67	134	178	114	135	95	135	95	169	95	132	103	151	47.1971	27.495	62.5578	34.8724	46.5928	29.1296	45.9064	0	13.341	17.696	23.491	25.0035	19.9726	20.9669
Chn2_chr6_54039554_54301810_(+)	Chn2	chr6	54039554	54301810	+	192	92	148	77	137	83	163	71	58	28	91	51	77	51	88	78	43	55	66	44	84	53	59	66	95	62	50	53	56	62	35.3979	16.8636	27.4734	14.2073	26.9334	16.2265	32.9636	28.8152	23.4479	8.69279	28.1274	16.7787	25.2113	12.5801
Clcn1_chr6_42286685_42315756_(+)	Clcn1	chr6	42286685	42315756	+	122	38	72	29	62	20	137	53	25	27	39	30	41	19	84	52	36	23	42	15	67	34	43	22	61	28	36	11	55	31	22.4924	6.96539	13.3655	5.35079	12.1888	3.91001	27.7056	21.51	10.1068	8.38233	12.0546	9.86982	13.4242	4.68671
Clstn3_chr6_124430581_124464794_(-)	Clstn3	chr6	124430581	124464794	-	131	9	119	4	109	2	167	5	30	6	49	6	50	2	65	10	47	3	167	7	119	12	117	12	121	10	92	7	104	18	24.1517	1.6497	22.0901	0.73804	21.4287	0.391001	33.7726	2.02924	12.1282	1.86274	15.1455	1.97396	16.371	0.493338
Cmas_chr6_142756686_142775714_(+)	Cmas	chr6	142756686	142775714	+	317	36	345	33	306	39	350	32	79	28	137	23	118	18	148	18	102	23	213	46	216	35	167	30	215	45	181	36	234	39	58.4433	6.59879	64.0428	6.08883	60.1577	7.62452	70.7808	12.9871	31.9376	8.69279	42.3456	7.56686	38.6356	4.44004
Cntnap2_chr6_45059357_47304213_(+)	Cntnap2	chr6	45059357	47304213	+	85	23	121	28	117	19	94	15	26	11	30	14	32	13	23	18	17	13	58	39	59	40	45	30	55	31	63	29	67	46	15.6709	4.21589	22.4614	5.16628	23.0015	3.71451	19.0097	6.08772	10.5111	3.41502	9.27275	4.60591	10.4774	3.20669
Copg1_chr6_87887814_87913595_(+)	Copg1	chr6	87887814	87913595	+	454	276	480	264	453	243	378	0	117	114	143	113	132	135	161	204	129	147	341	343	288	278	248	281	243	291	283	275	294	255	83.7012	50.5907	89.103	48.7106	89.057	47.5066	76.4433	0	47.3	35.3921	44.2001	37.1763	43.2194	33.3003
Copg2_chr6_30747554_30896794_(-)	Copg2	chr6	30747554	30896794	-	245	61	200	70	178	64	252	64	79	42	130	67	102	50	170	81	96	56	234	103	248	106	156	88	170	115	212	92	250	109	45.1691	11.1813	37.1263	12.9157	34.9937	12.512	50.9622	25.9743	31.9376	13.0392	40.1819	22.0426	33.3968	12.3334
Cped1_chr6_21985916_22256404_(+)	Cped1	chr6	21985916	22256404	+	42	12	42	15	34	12	39	3	9	3	4	5	10	2	1	0	2	3	7	3	5	1	11	8	5	5	8	2	3	6	7.74328	2.1996	7.79652	2.76765	6.68419	2.346	7.88701	1.21754	3.63846	0.93137	1.23637	1.64497	3.2742	0.493338
Creld1_chr6_113483297_113493343_(+)	Creld1	chr6	113483297	113493343	+	38	27	57	39	43	39	54	30	9	28	20	28	16	28	19	46	15	35	41	65	28	75	20	61	27	66	35	50	42	70	7.00583	4.94909	10.581	7.19589	8.45354	7.62452	10.9205	12.1754	3.63846	8.69279	6.18184	9.21183	5.23872	6.90673
Cul1_chr6_47453398_47526139_(+)	Cul1	chr6	47453398	47526139	+	668	267	765	277	663	271	526	163	116	80	196	125	198	132	115	71	125	80	318	182	262	109	262	188	235	152	260	157	246	132	123.155	48.941	142.008	51.1092	130.342	52.9806	106.373	66.1532	46.8957	24.8365	60.582	41.1242	64.8292	32.5603
D630045J12Rik_chr6_38123174_38254009_(-)	D630045J12Rik	chr6	38123174	38254009	-	238	61	227	68	239	66	272	86	109	37	158	63	96	49	169	64	97	67	264	97	225	91	184	81	198	96	241	78	286	92	43.8786	11.1813	42.1383	12.5467	46.9859	12.903	55.0068	34.9029	44.0658	11.4869	48.8365	20.7266	31.4323	12.0868
Dcp1b_chr6_119175253_119221616_(+)	Dcp1b	chr6	119175253	119221616	+	133	40	138	47	131	47	134	28	48	28	79	33	62	32	97	60	63	31	88	27	120	35	84	51	105	48	83	24	97	43	24.5204	7.33199	25.6171	8.67197	25.7538	9.18852	27.0989	11.3637	19.4051	8.69279	24.4183	10.8568	20.3	7.8934
Dctn1_chr6_83165920_83200117_(+)	Dctn1	chr6	83165920	83200117	+	191	59	174	57	187	44	153	0	64	25	67	30	61	30	99	25	71	26	131	56	119	45	84	68	119	67	101	45	122	58	35.2135	10.8147	32.2999	10.5171	36.7631	8.60202	30.9413	0	25.8735	7.76142	20.7091	9.86982	19.9726	7.40006
Dennd2a_chr6_39462378_39557867_(-)	Dennd2a	chr6	39462378	39557867	-	510	131	431	100	385	75	345	85	178	74	178	88	160	69	241	128	164	91	257	109	267	84	235	90	246	121	263	94	341	99	94.0256	24.0123	80.0071	18.451	75.6887	14.6625	69.7697	34.4971	71.9607	22.9738	55.0183	28.9515	52.3872	17.0201
Dennd5b_chr6_148988071_149101680_(-)	Dennd5b	chr6	148988071	149101680	-	286	104	274	110	237	94	250	87	77	68	148	91	106	82	98	63	82	55	139	122	159	113	127	109	173	128	152	103	137	101	52.7281	19.0632	50.863	20.2961	46.5928	18.377	50.5577	35.3088	31.1291	21.1111	45.7456	29.9384	34.7065	20.2268
Dera_chr6_137754546_137857340_(+)	Dera	chr6	137754546	137857340	+	288	84	321	89	274	68	299	74	96	23	135	34	105	23	145	45	106	39	228	74	254	64	149	44	229	62	219	60	265	55	53.0968	15.3972	59.5877	16.4214	53.8667	13.294	60.467	30.0328	38.8103	7.1405	41.7274	11.1858	34.3791	5.67338
Dgki_chr6_36846022_37300184_(-)	Dgki	chr6	36846022	37300184	-	155	71	181	53	194	71	146	40	61	44	91	61	74	64	86	69	50	42	71	47	66	41	193	136	143	126	47	36	72	42	28.5764	13.0143	33.5993	9.77903	38.1392	13.8805	29.5257	16.2339	24.6607	13.6601	28.1274	20.0686	24.2291	15.7868
Dguok_chr6_83480217_83506969_(-)	Dguok	chr6	83480217	83506969	-	80	17	70	11	80	14	55	0	12	8	29	11	18	8	49	14	26	9	50	25	64	23	53	32	53	27	47	13	57	28	14.7491	3.1161	12.9942	2.02961	15.7275	2.73701	11.1227	0	4.85128	2.48365	8.96366	3.61893	5.89356	1.97335
Dppa3_chr6_122626410_122630272_(+)	Dppa3	chr6	122626410	122630272	+	189	147	251	215	171	193	169	164	27	42	38	66	35	60	77	160	38	75	135	271	106	283	155	314	120	292	124	288	141	343	34.8448	26.9451	46.5935	39.6696	33.6176	37.7316	34.177	66.5591	10.9154	13.0392	11.7455	21.7136	11.4597	14.8001
Dusp11_chr6_85942268_85961667_(-)	Dusp11	chr6	85942268	85961667	-	180	63	167	75	192	57	145	0	35	17	70	34	61	19	47	30	50	29	113	58	92	61	102	60	104	74	88	53	122	60	33.1855	11.5479	31.0004	13.8382	37.746	11.1435	29.3235	0	14.1496	5.27776	21.6364	11.1858	19.9726	4.68671
Edem1_chr6_108828641_108859356_(+)	Edem1	chr6	108828641	108859356	+	269	50	334	65	297	58	169	1	78	23	129	39	76	24	101	70	65	38	159	68	150	64	134	48	156	62	131	67	165	55	49.5939	9.16499	62.0009	11.9931	58.3884	11.339	34.177	0.405848	31.5333	7.1405	39.8728	12.8308	24.8839	5.92005
Eefsec_chr6_88257334_88446539_(-)	Eefsec	chr6	88257334	88446539	-	497	118	402	100	399	91	336	0	202	74	266	115	218	79	433	170	248	113	422	179	488	159	380	162	405	176	431	153	465	174	91.6288	21.6294	74.6238	18.451	78.441	17.7905	67.9496	0	81.6633	22.9738	82.2184	37.8343	71.3776	19.4868
Eif2ak3_chr6_70844515_70905245_(+)	Eif2ak3	chr6	70844515	70905245	+	203	59	270	73	264	59	166	0	79	33	92	46	69	35	137	57	102	50	183	79	155	74	110	67	193	107	141	62	167	92	37.4259	10.8147	50.1205	13.4692	51.9008	11.5345	33.5703	0	31.9376	10.2451	28.4364	15.1337	22.592	8.63341
Emc3_chr6_113514874_113531652_(-)	Emc3	chr6	113514874	113531652	-	59	32	68	41	61	33	64	30	14	11	20	10	15	13	29	21	18	12	36	34	50	22	31	23	43	43	33	31	40	29	10.8775	5.86559	12.6229	7.56491	11.9922	6.45151	12.9428	12.1754	5.65983	3.41502	6.18184	3.28994	4.9113	3.20669
Eogt_chr6_97110024_97149182_(-)	Eogt	chr6	97110024	97149182	-	110	28	104	19	74	30	66	0	39	10	26	14	25	12	41	19	26	19	29	20	28	14	23	17	32	19	22	14	32	17	20.28	5.13239	19.3057	3.50569	14.548	5.86501	13.3472	0	15.7667	3.10457	8.03639	4.60591	8.1855	2.96003
Eps8_chr6_137477245_137654876_(-)	Eps8	chr6	137477245	137654876	-	673	40	896	42	883	28	850	37	382	31	504	39	515	41	643	58	545	42	902	86	762	60	625	42	701	50	751	65	807	67	124.077	7.33199	166.326	7.74942	173.592	5.47401	171.896	15.0164	154.433	9.62416	155.782	12.8308	168.621	10.1134
Erc1_chr6_119570796_119848167_(-)	Erc1	chr6	119570796	119848167	-	885	369	844	320	761	295	722	268	262	184	378	240	334	268	381	355	254	244	569	430	480	358	406	348	456	404	525	361	554	395	163.162	67.6376	156.673	59.0432	149.608	57.6726	146.011	108.767	105.92	57.124	116.837	78.9585	109.358	66.1072
Ergic2_chr6_148179079_148212374_(-)	Ergic2	chr6	148179079	148212374	-	155	21	155	27	144	28	153	11	30	9	38	9	56	12	47	7	43	5	129	32	92	22	75	12	97	24	99	12	124	18	28.5764	3.84929	28.7729	4.98177	28.3095	5.47401	30.9413	4.46433	12.1282	2.79411	11.7455	2.96094	18.3355	2.96003
Etnk1_chr6_143167221_143232307_(+)	Etnk1	chr6	143167221	143232307	+	608	194	667	212	576	178	861	230	245	131	440	177	322	164	394	203	229	144	499	291	449	232	260	194	406	264	373	224	527	246	112.093	35.5601	123.816	39.1161	113.238	34.7991	174.121	93.3451	99.047	40.6698	136	58.2319	105.429	40.4537
Etv6_chr6_134035700_134270158_(+)	Etv6	chr6	134035700	134270158	+	1576	562	1667	558	1829	628	1004	429	540	430	735	572	656	548	454	440	424	382	641	562	374	314	567	600	590	584	554	493	469	393	290.557	103.014	309.447	102.957	359.57	122.774	203.04	174.109	218.308	133.496	227.182	188.184	214.788	135.175
Ezh2_chr6_47530139_47595341_(-)	Ezh2	chr6	47530139	47595341	-	1206	393	1329	416	1163	393	1195	424	326	196	551	258	447	221	669	356	386	208	1102	496	1057	507	738	411	802	423	999	416	1048	469	222.343	72.0368	246.704	76.7561	228.639	76.8317	241.666	172.08	131.793	60.8495	170.31	84.8804	146.357	54.5138
Fam221a_chr6_49367739_49390539_(+)	Fam221a	chr6	49367739	49390539	+	39	24	45	20	31	10	31	10	14	10	22	11	23	3	34	15	23	15	70	24	37	35	16	29	34	27	18	26	31	34	7.19019	4.39919	8.35341	3.6902	6.09441	1.955	6.26916	4.05848	5.65983	3.10457	6.80002	3.61893	7.53066	0.740006
Fam3c_chr6_22306520_22356243_(-)	Fam3c	chr6	22306520	22356243	-	809	460	1158	810	965	653	672	448	254	276	475	339	376	319	359	329	310	268	482	458	519	465	514	630	530	558	382	394	535	513	149.15	84.3179	214.961	149.453	189.713	127.662	135.899	181.82	102.686	85.686	146.819	111.529	123.11	78.6874
Fancd2_chr6_113531682_113597017_(+)	Fancd2	chr6	113531682	113597017	+	584	224	524	190	475	195	517	229	160	111	237	133	178	107	263	192	185	139	355	255	388	246	291	245	332	258	332	200	393	258	107.668	41.0591	97.2708	35.0569	93.3821	38.1226	104.553	92.9392	64.6838	34.4607	73.2548	43.7562	58.2808	26.3936
Fbxl14_chr6_119479668_119482630_(+)	Fbxl14	chr6	119479668	119482630	+	66	58	72	61	64	74	69	52	11	20	18	32	21	32	10	24	18	24	33	53	28	38	21	38	24	44	15	44	30	52	12.168	10.6314	13.3655	11.2551	12.582	14.467	13.9539	21.1041	4.44701	6.20913	5.56365	10.5278	6.87582	7.8934
Fgd5_chr6_91978878_92076004_(+)	Fgd5	chr6	91978878	92076004	+	75	22	51	22	46	14	46	0	24	20	35	18	22	14	37	27	19	20	6	16	31	42	25	35	43	30	12	20	51	27	13.8273	4.03259	9.4672	4.05922	9.04332	2.73701	9.30262	0	9.70257	6.20913	10.8182	5.92189	7.20324	3.45336
Fkbp4_chr6_128429735_128438677_(-)	Fkbp4	chr6	128429735	128438677	-	774	749	893	794	853	763	744	713	178	249	224	326	159	257	271	469	230	317	614	1041	703	1049	441	846	452	865	496	756	712	1014	142.698	137.291	165.769	146.501	167.695	149.167	150.46	289.37	71.9607	77.3037	69.2366	107.252	52.0598	63.3939
Fkbp9_chr6_56832059_56879358_(+)	Fkbp9	chr6	56832059	56879358	+	960	196	1338	294	1288	248	865	183	367	136	527	169	394	141	429	159	353	156	582	208	508	232	450	222	593	226	453	183	510	223	176.989	35.9267	248.375	54.2459	253.213	48.4841	174.93	74.2702	148.368	42.2221	162.891	55.6	129.003	34.7803
Foxm1_chr6_128362967_128376146_(+)	Foxm1	chr6	128362967	128376146	+	145	91	141	88	167	103	139	103	44	36	63	66	41	44	67	75	66	53	78	84	71	100	62	87	70	97	59	59	61	65	26.7328	16.6803	26.174	16.2369	32.8312	20.1365	28.1101	41.8024	17.788	11.1764	19.4728	21.7136	13.4242	10.8534
Foxp1_chr6_98925338_99522721_(-)	Foxp1	chr6	98925338	99522721	-	850	320	843	309	919	371	539	1	234	145	322	192	274	202	287	260	242	180	321	249	303	218	336	364	437	326	218	192	226	232	156.709	58.6559	156.487	57.0136	180.67	72.5306	109.002	0.405848	94.6	45.0162	99.5276	63.1668	89.7131	49.8271
Foxp2_chr6_14901349_15441977_(+)	Foxp2	chr6	14901349	15441977	+	28	41	30	45	41	55	19	31	5	30	16	50	10	46	7	13	4	15	3	15	7	25	4	44	12	52	2	19	6	19	5.16219	7.51529	5.56894	8.30295	8.06035	10.7525	3.84239	12.5813	2.02137	9.3137	4.94547	16.4497	3.2742	11.3468
Frmd4b_chr6_97286867_97617541_(-)	Frmd4b	chr6	97286867	97617541	-	417	46	406	31	513	27	135	0	105	23	204	42	125	20	82	34	98	24	30	26	51	23	68	43	101	37	30	23	36	21	76.8797	8.43179	75.3663	5.71981	100.853	5.27851	27.3012	0	42.4487	7.1405	63.0547	13.8177	40.9275	4.93338
Gabarapl1_chr6_129533160_129542346_(+)	Gabarapl1	chr6	129533160	129542346	+	76	28	62	14	58	9	62	26	6	9	10	6	9	4	11	16	11	11	20	15	22	20	13	18	28	35	22	20	33	20	14.0117	5.13239	11.5091	2.58314	11.4024	1.7595	12.5383	10.5521	2.42564	2.79411	3.09092	1.97396	2.94678	0.986675
Gadd45a_chr6_67035096_67037457_(-)	Gadd45a	chr6	67035096	67037457	-	159	33	177	42	140	24	125	24	26	6	47	4	35	11	41	18	42	25	71	19	53	12	67	22	51	20	46	7	43	19	29.3139	6.04889	32.8567	7.74942	27.5231	4.69201	25.2789	9.74036	10.5111	1.86274	14.5273	1.31598	11.4597	2.71336
Gars_chr6_55038007_55079500_(+)	Gars	chr6	55038007	55079500	+	2107	496	1719	428	1537	395	1711	454	548	221	685	238	646	210	818	302	687	270	1338	474	1541	504	1218	498	1331	555	1168	442	1561	536	388.455	90.9167	319.1	78.9702	302.165	77.2227	346.017	184.255	221.542	68.6109	211.728	78.3005	211.513	51.8005
Gcfc2_chr6_81923669_81959915_(+)	Gcfc2	chr6	81923669	81959915	+	335	74	284	57	259	41	175	0	69	29	127	30	86	35	145	53	89	26	147	54	147	37	135	45	152	60	146	46	190	63	61.7619	13.5642	52.7193	10.5171	50.9178	8.01552	35.3904	0	27.8949	9.00324	39.2547	9.86982	28.1581	8.63341
Gfpt1_chr6_87042846_87092197_(+)	Gfpt1	chr6	87042846	87092197	+	158	86	174	81	147	58	128	0	30	21	53	41	46	36	59	54	44	26	64	89	93	89	52	90	94	87	69	87	97	89	29.1295	15.7638	32.2999	14.9453	28.8993	11.339	25.8856	0	12.1282	6.51959	16.3819	13.4887	15.0613	8.88008
Ggct_chr6_54982580_54992950_(-)	Ggct	chr6	54982580	54992950	-	52	35	62	61	44	40	52	45	10	12	5	9	11	5	9	19	3	16	21	38	28	39	19	40	24	40	22	40	23	51	9.58692	6.41549	11.5091	11.2551	8.65013	7.82002	10.516	18.2632	4.04274	3.72548	1.54546	2.96094	3.60162	1.23334
Gm10069_chr6_128438757_128503281_(+)	Gm10069	chr6	128438757	128503281	+	100	40	102	43	114	55	129	58	42	43	63	52	43	28	116	111	75	73	120	105	148	156	102	102	95	140	92	113	130	155	18.4364	7.33199	18.9344	7.93393	22.4117	10.7525	26.0878	23.5392	16.9795	13.3496	19.4728	17.1077	14.0791	6.90673
Gm44260_chr6_120912900_120914993_(-)	Gm44260	chr6	120912900	120914993	-	27	6	24	11	40	3	28	8	10	6	11	4	9	5	20	8	16	7	16	8	21	7	15	13	28	9	11	6	19	9	4.97782	1.0998	4.45515	2.02961	7.86376	0.586501	5.66247	3.24679	4.04274	1.86274	3.40001	1.31598	2.94678	1.23334
Gm45062_chr6_8259450_8597480_(+)	Gm45062	chr6	8259450	8597480	+	51	46	53	66	65	94	35	66	7	34	17	60	14	57	6	37	16	35	42	102	32	75	16	78	20	105	35	68	30	74	9.40256	8.43179	9.83846	12.1777	12.7786	18.377	7.07808	26.786	2.82992	10.5555	5.25456	19.7396	4.58388	14.0601
Gm5724_chr6_141708118_141773810_(-)	Gm5724	chr6	141708118	141773810	-	396	17	588	37	533	48	415	35	51	7	79	6	72	26	26	3	24	11	123	21	111	11	206	42	150	44	122	23	102	16	73.0081	3.1161	109.151	6.82687	104.785	9.38402	83.9258	14.2047	20.618	2.1732	24.4183	1.97396	23.5742	6.41339
Gng12_chr6_66896397_67021350_(+)	Gng12	chr6	66896397	67021350	+	348	79	286	74	266	77	264	67	83	65	159	61	93	41	152	90	103	46	151	89	152	76	104	50	158	89	145	85	143	85	64.1586	14.4807	53.0906	13.6537	52.294	15.0535	53.389	27.1918	33.5547	20.1797	49.1456	20.0686	30.4501	10.1134
Golt1b_chr6_142387221_142403858_(+)	Golt1b	chr6	142387221	142403858	+	408	27	456	36	397	30	379	32	101	16	102	11	125	20	126	29	76	30	341	22	308	23	309	29	310	24	309	27	297	21	75.2204	4.94909	84.6479	6.64236	78.0478	5.86501	76.6455	12.9871	40.8316	4.96731	31.5274	3.61893	40.9275	4.93338
Gpr19_chr6_134869093_134898578_(-)	Gpr19	chr6	134869093	134898578	-	217	9	229	10	183	12	215	9	84	1	84	4	83	5	135	5	102	8	115	11	143	10	128	9	152	11	119	9	148	7	40.007	1.6497	42.5096	1.8451	35.9767	2.346	43.4796	3.65263	33.959	0.310457	25.9637	1.31598	27.1759	1.23334
Grip2_chr6_91761509_91827250_(-)	Grip2	chr6	91761509	91827250	-	31	4	32	6	37	7	30	0	9	8	15	5	10	6	14	11	11	5	11	10	17	1	16	11	24	16	5	5	12	9	5.71528	0.733199	5.9402	1.10706	7.27398	1.3685	6.06693	0	3.63846	2.48365	4.63638	1.64497	3.2742	1.48001
H4f16_chr6_136801553_136804415_(-)	H4f16	chr6	136801553	136804415	-	78	129	84	131	84	130	63	135	6	29	11	25	9	23	16	28	6	26	46	134	39	109	46	132	36	129	44	103	49	150	14.3804	23.6457	15.593	24.1708	16.5139	25.4151	12.7405	54.7895	2.42564	9.00324	3.40001	8.22485	2.94678	5.67338
Halr1_chr6_52102949_52113684_(+)	Halr1	chr6	52102949	52113684	+	177	29	85	20	78	15	182	31	12	0	27	6	12	2	13	5	13	3	70	23	49	16	18	6	21	0	48	12	40	10	32.6324	5.31569	15.7787	3.6902	15.3343	2.93251	36.806	12.5813	4.85128	0	8.34548	1.97396	3.92904	0.493338
Hdhd5_chr6_120509494_120531319_(-)	Hdhd5	chr6	120509494	120531319	-	201	52	170	44	194	60	246	59	66	33	83	24	65	23	110	43	77	44	145	57	156	69	122	55	132	62	132	56	162	48	37.0571	9.53159	31.5573	8.11844	38.1392	11.73	49.7488	23.945	26.6821	10.2451	25.6546	7.89585	21.2823	5.67338
Herc3_chr6_58831465_58920398_(+)	Herc3	chr6	58831465	58920398	+	216	94	325	118	340	125	270	142	94	82	147	99	110	88	225	172	110	107	257	196	262	195	157	139	213	194	214	186	250	215	39.8226	17.2302	60.3302	21.7722	66.8419	24.4375	54.6023	57.6304	38.0017	25.4574	45.4365	32.5704	36.0162	21.7069
Hibadh_chr6_52546228_52640389_(-)	Hibadh	chr6	52546228	52640389	-	383	127	454	149	369	124	488	119	142	62	219	102	136	76	232	140	180	104	213	137	232	149	144	115	244	139	197	99	213	152	70.6114	23.2791	84.2766	27.492	72.5432	24.242	98.6887	48.2959	57.4069	19.2483	67.6911	33.5574	44.5291	18.7468
Hipk2_chr6_38694390_38876165_(-)	Hipk2	chr6	38694390	38876165	-	455	144	401	120	422	115	450	154	162	71	237	99	231	91	246	110	221	105	408	147	258	108	367	162	341	144	388	138	302	123	83.8855	26.3952	74.4382	22.1412	82.9626	22.4825	91.0039	62.5006	65.4923	22.0424	73.2548	32.5704	75.634	22.4469
Hk2_chr6_82725025_82774454_(-)	Hk2	chr6	82725025	82774454	-	1570	596	1547	562	1466	541	1247	2	318	184	663	323	315	221	721	424	525	346	1186	730	1258	717	576	488	751	526	1069	609	1267	732	289.451	109.247	287.172	103.695	288.207	105.766	252.182	0.811696	128.559	57.124	204.928	106.265	103.137	54.5138
Hmces_chr6_87913935_87936629_(+)	Hmces	chr6	87913935	87936629	+	324	41	261	31	310	34	399	0	139	38	158	32	126	37	122	62	103	40	375	106	222	107	196	65	224	92	291	102	275	101	59.7339	7.51529	48.4498	5.71981	60.9441	6.64701	80.6901	0	56.194	11.7974	48.8365	10.5278	41.2549	9.12675
Hnrnpf_chr6_117900324_117925622_(+)	Hnrnpf	chr6	117900324	117925622	+	635	418	659	456	611	469	590	430	244	191	334	298	320	318	343	274	227	232	570	495	517	438	425	461	502	572	446	392	463	440	117.071	76.6193	122.331	84.1365	120.119	91.6897	119.316	174.515	98.6428	59.2972	103.237	98.0402	104.774	78.4407
Hrh1_chr6_114397936_114483296_(+)	Hrh1	chr6	114397936	114483296	+	61	36	72	30	60	14	65	26	26	16	23	15	24	10	44	29	29	23	42	32	55	32	63	64	43	48	38	39	46	35	11.2462	6.59879	13.3655	5.5353	11.7956	2.73701	13.145	10.5521	10.5111	4.96731	7.10911	4.93491	7.85808	2.46669
Ica1_chr6_8630527_8778488_(-)	Ica1	chr6	8630527	8778488	-	85	136	80	82	84	97	69	89	27	57	37	83	23	60	23	92	20	72	29	82	25	84	38	108	20	132	27	68	34	100	15.6709	24.9288	14.8505	15.1298	16.5139	18.9635	13.9539	36.1205	10.9154	17.696	11.4364	27.3065	7.53066	14.8001
Ints13_chr6_146549632_146577835_(-)	Ints13	chr6	146549632	146577835	-	204	17	205	21	161	11	171	6	57	4	75	3	59	10	82	9	51	5	181	18	135	20	119	19	139	12	122	11	129	14	37.6102	3.1161	38.0544	3.87471	31.6516	2.1505	34.5815	2.43509	23.0436	1.24183	23.1819	0.986982	19.3178	2.46669
Ipo8_chr6_148770683_148831467_(-)	Ipo8	chr6	148770683	148831467	-	447	270	484	254	505	241	540	265	133	90	178	101	165	128	159	147	133	107	305	255	280	255	199	270	255	230	259	207	262	216	82.4106	49.4909	89.8456	46.8655	99.2799	47.1156	109.205	107.55	53.7684	27.9411	55.0183	33.2284	54.0243	31.5736
Irak2_chr6_113638467_113695026_(+)	Irak2	chr6	113638467	113695026	+	45	19	79	35	55	24	45	18	7	9	17	10	14	6	16	16	13	9	49	48	32	28	13	34	26	27	22	33	25	18	8.29637	3.48269	14.6649	6.45785	10.8127	4.69201	9.10039	7.30527	2.82992	2.79411	5.25456	3.28994	4.58388	1.48001
Itfg2_chr6_128409444_128424931_(-)	Itfg2	chr6	128409444	128424931	-	98	65	95	50	92	53	80	54	34	43	38	27	32	42	41	42	23	37	43	56	42	46	42	76	44	54	37	43	55	50	18.0677	11.9145	17.635	9.2255	18.0866	10.3615	16.1785	21.9158	13.7453	13.3496	11.7455	8.88283	10.4774	10.3601
Itpr1_chr6_108213096_108551109_(+)	Itpr1	chr6	108213096	108551109	+	1452	513	1257	375	1160	334	704	0	469	265	733	418	499	359	866	617	566	404	884	605	1036	687	696	536	975	662	863	555	967	651	267.696	94.0328	233.339	69.1912	228.049	65.2971	142.371	0	189.604	82.271	226.564	137.519	163.383	88.5541
Jagn1_chr6_113442569_113448229_(+)	Jagn1	chr6	113442569	113448229	+	81	7	93	13	84	8	65	7	26	1	24	2	22	3	39	4	19	3	59	8	49	9	54	17	31	6	38	5	37	14	14.9335	1.2831	17.2637	2.39863	16.5139	1.564	13.145	2.84094	10.5111	0.310457	7.4182	0.657988	7.20324	0.740006
Kbtbd8_chr6_95117240_95129790_(+)	Kbtbd8	chr6	95117240	95129790	+	85	47	109	47	79	58	76	0	8	8	18	13	17	28	9	9	12	17	49	61	52	45	25	39	36	36	42	53	51	51	15.6709	8.61509	20.2338	8.67197	15.5309	11.339	15.3695	0	3.23419	2.48365	5.56365	4.27692	5.56614	6.90673
Kdm5a_chr6_120364124_120444574_(+)	Kdm5a	chr6	120364124	120444574	+	496	394	475	421	449	342	399	345	150	198	180	275	193	263	239	360	162	239	365	455	303	422	247	416	278	471	344	426	336	464	91.4445	72.2201	88.1749	77.6787	88.2707	66.8611	80.6901	140.018	60.641	61.4704	55.6365	90.4733	63.1921	64.8739
Kdm7a_chr6_39136623_39206789_(-)	Kdm7a	chr6	39136623	39206789	-	109	20	114	25	96	32	107	32	58	28	82	32	67	40	137	84	93	34	158	57	187	61	107	61	129	81	136	46	220	79	20.0957	3.66599	21.162	4.61275	18.873	6.25601	21.6387	12.9871	23.4479	8.69279	25.3455	10.5278	21.9371	9.86675
Kras_chr6_145216699_145250239_(-)	Kras	chr6	145216699	145250239	-	844	44	752	48	736	52	615	44	217	19	262	37	240	30	265	47	210	28	399	43	503	53	456	53	552	51	372	40	502	47	155.603	8.06519	139.595	8.85648	144.693	10.166	124.372	17.8573	87.7274	5.89868	80.982	12.1728	78.5808	7.40006
Krba1_chr6_48395586_48419781_(+)	Krba1	chr6	48395586	48419781	+	278	83	283	57	256	88	239	64	81	26	108	29	85	31	110	45	76	31	166	71	141	51	189	70	152	64	123	42	126	55	51.2531	15.2139	52.5337	10.5171	50.328	17.204	48.3332	25.9743	32.7462	8.07187	33.3819	9.54082	27.8307	7.64673
Lancl2_chr6_57702540_57739439_(+)	Lancl2	chr6	57702540	57739439	+	184	61	189	60	167	52	173	61	26	16	46	34	29	15	34	14	29	12	71	33	80	32	51	40	81	47	60	38	72	47	33.9229	11.1813	35.0843	11.0706	32.8312	10.166	34.9859	24.7567	10.5111	4.96731	14.2182	11.1858	9.49518	3.70003
Ldhb_chr6_142490249_142507957_(-)	Ldhb	chr6	142490249	142507957	-	102	32	130	51	86	37	92	36	25	27	33	15	14	17	72	50	20	22	49	80	76	79	32	56	69	62	47	63	76	74	18.8051	5.86559	24.1321	9.41001	16.9071	7.23351	18.6052	14.6105	10.1068	8.38233	10.2	4.93491	4.58388	4.19337
Lncpint_chr6_31082565_31220488_(-)	Lncpint	chr6	31082565	31220488	-	283	112	273	116	335	117	185	51	233	163	256	192	259	183	368	280	233	147	164	131	265	139	231	177	341	281	156	87	244	160	52.175	20.5296	50.6774	21.4031	65.859	22.8735	37.4127	20.6983	94.1958	50.6044	79.1275	63.1668	84.8018	45.1404
Lockd_chr6_134929092_134956798_(+)	Lockd	chr6	134929092	134956798	+	155	5	145	6	121	6	172	7	134	7	165	11	152	7	276	17	202	18	179	7	291	10	182	7	284	16	153	9	299	15	28.5764	0.916499	26.9165	1.10706	23.7879	1.173	34.7837	2.84094	54.1727	2.1732	51.0001	3.61893	49.7678	1.72668
Lpcat3_chr6_124663027_124704418_(+)	Lpcat3	chr6	124663027	124704418	+	44	10	47	22	55	16	49	14	23	3	27	18	32	18	34	16	29	14	54	23	51	34	53	31	46	38	43	27	52	25	8.11201	1.833	8.72467	4.05922	10.8127	3.12801	9.90931	5.68187	9.29829	0.93137	8.34548	5.92189	10.4774	4.44004
Lrguk_chr6_34029448_34134034_(+)	Lrguk	chr6	34029448	34134034	+	66	27	84	21	64	22	63	22	19	12	31	14	48	18	45	11	35	19	56	25	62	23	54	28	80	34	44	19	56	30	12.168	4.94909	15.593	3.87471	12.582	4.30101	12.7405	8.92866	7.6812	3.72548	9.58185	4.60591	15.7162	4.44004
Lrig1_chr6_94604529_94700158_(-)	Lrig1	chr6	94604529	94700158	-	143	44	152	44	158	39	152	0	48	21	71	30	35	33	70	45	72	39	101	71	81	67	49	42	104	56	69	40	102	70	26.364	8.06519	28.216	8.11844	31.0618	7.62452	30.7391	0	19.4051	6.51959	21.9455	9.86982	11.4597	8.14007
Lrp6_chr6_134446476_134566965_(-)	Lrp6	chr6	134446476	134566965	-	1252	32	1260	25	1153	28	1136	18	432	7	638	16	541	12	655	16	472	11	795	20	771	26	810	25	869	24	769	20	794	29	230.824	5.86559	233.895	4.61275	226.673	5.47401	229.734	7.30527	174.646	2.1732	197.201	5.2639	177.134	2.96003
Lsm8_chr6_18848579_18855751_(+)	Lsm8	chr6	18848579	18855751	+	74	62	79	67	83	85	72	71	8	13	21	26	7	33	12	34	15	23	84	83	61	48	39	55	37	68	65	66	62	70	13.6429	11.3646	14.6649	12.3622	16.3173	16.6175	14.5606	28.8152	3.23419	4.03594	6.49093	8.55384	2.29194	8.14007
Luc7l2_chr6_38551334_38609470_(+)	Luc7l2	chr6	38551334	38609470	+	1005	517	1041	505	1057	506	1110	544	407	219	738	379	558	304	831	418	467	252	1182	552	1281	638	996	567	1010	621	1123	561	1374	636	185.286	94.766	193.242	93.1775	207.8	98.9232	224.476	220.781	164.539	67.99	228.11	124.689	182.7	74.9873
M6pr_chr6_122308720_122317680_(+)	M6pr	chr6	122308720	122317680	+	279	43	272	60	260	48	285	53	57	19	74	35	53	19	87	23	70	24	172	60	197	48	114	44	152	39	161	35	150	43	51.4375	7.88189	50.4917	11.0706	51.1144	9.38402	57.6358	21.51	23.0436	5.89868	22.8728	11.5148	17.3533	4.68671
Mad2l1_chr6_66535390_66547220_(+)	Mad2l1	chr6	66535390	66547220	+	128	45	163	64	141	58	143	67	30	13	34	21	32	15	32	24	19	16	83	71	64	67	64	46	42	43	77	50	72	49	23.5986	8.24849	30.2579	11.8086	27.7197	11.339	28.919	27.1918	12.1282	4.03594	10.5091	6.90887	10.4774	3.70003
Magi1_chr6_93675455_94283917_(-)	Magi1	chr6	93675455	94283917	-	3034	930	3030	997	2745	924	1549	3	1354	817	2163	1193	1643	1133	1747	1307	1357	888	1811	1311	1316	909	1482	1323	1895	1425	1487	1206	1399	1051	559.36	170.469	562.463	183.956	539.65	180.642	313.256	1.21754	547.387	253.643	668.566	392.49	537.951	279.476
Marchf8_chr6_116338024_116409540_(+)	Marchf8	chr6	116338024	116409540	+	201	100	249	129	280	113	231	101	93	73	141	110	113	121	109	147	92	72	147	127	151	136	150	148	179	171	115	117	155	126	37.0571	18.33	46.2222	23.8018	55.0463	22.0915	46.7153	40.9907	37.5975	22.6633	43.5819	36.1893	36.9985	29.8469
Mdfic_chr6_15720661_15802169_(+)	Mdfic	chr6	15720661	15802169	+	114	100	89	134	63	106	49	92	8	47	31	83	20	62	13	79	13	60	23	134	22	88	21	114	35	132	23	114	32	131	21.0175	18.33	16.5212	24.7243	12.3854	20.723	9.90931	37.338	3.23419	14.5915	9.58185	27.3065	6.5484	15.2935
Med21_chr6_146642547_146650732_(+)	Med21	chr6	146642547	146650732	+	75	42	55	38	60	39	76	47	9	5	18	21	21	7	29	24	16	15	59	49	67	46	41	37	57	50	36	40	55	45	13.8273	7.69859	10.2097	7.01138	11.7956	7.62452	15.3695	19.0749	3.63846	1.55228	5.56365	6.90887	6.87582	1.72668
Met_chr6_17463800_17573980_(+)	Met	chr6	17463800	17573980	+	58	75	61	65	41	82	34	37	8	30	11	55	9	30	9	48	9	37	20	44	14	31	12	58	17	52	17	53	11	54	10.6931	13.7475	11.3235	11.9931	8.06035	16.031	6.87585	15.0164	3.23419	9.3137	3.40001	18.0947	2.94678	7.40006
Mical3_chr6_120931707_121130999_(-)	Mical3	chr6	120931707	121130999	-	695	238	552	160	525	162	594	177	218	122	293	184	203	147	415	304	308	204	424	321	436	280	281	272	375	313	348	243	424	299	128.133	43.6253	102.468	29.5216	103.212	31.6711	120.125	71.8351	88.1317	37.8757	90.5639	60.5349	66.4663	36.2603
Mindy4_chr6_55203383_55320222_(+)	Mindy4	chr6	55203383	55320222	+	115	21	107	27	122	26	75	21	27	9	28	8	29	15	40	19	40	13	62	29	49	27	55	29	57	30	51	28	46	29	21.2018	3.84929	19.8626	4.98177	23.9845	5.08301	15.1673	8.52281	10.9154	2.79411	8.65457	2.63195	9.49518	3.70003
Mios_chr6_8209222_8236274_(+)	Mios	chr6	8209222	8236274	+	205	261	249	343	215	337	213	333	45	96	74	154	52	137	65	138	47	133	130	263	123	256	107	242	97	294	111	221	133	258	37.7946	47.8412	46.2222	63.2869	42.2677	65.8836	43.0752	135.147	18.1923	29.8038	22.8728	50.6651	17.0258	33.7936
Mkln1_chr6_31398735_31516811_(+)	Mkln1	chr6	31398735	31516811	+	372	118	353	110	327	113	358	106	132	58	208	109	188	87	201	92	122	65	265	125	281	120	216	120	258	141	218	110	249	111	68.5834	21.6294	65.5279	20.2961	64.2862	22.0915	72.3987	43.0199	53.3641	18.0065	64.2911	35.8603	61.555	21.4602
Mkrn2_chr6_115601902_115622624_(+)	Mkrn2	chr6	115601902	115622624	+	123	66	105	73	104	67	125	76	31	27	41	29	30	29	44	30	45	25	94	83	86	64	80	66	94	66	80	57	82	89	22.6768	12.0978	19.4913	13.4692	20.4458	13.0985	25.2789	30.8445	12.5325	8.38233	12.6728	9.54082	9.8226	7.1534
Mob1a_chr6_83326016_83343776_(+)	Mob1a	chr6	83326016	83343776	+	342	174	329	181	274	158	268	0	54	71	74	84	61	89	70	91	44	58	206	204	205	185	121	185	148	198	171	171	215	201	63.0524	31.8942	61.0727	33.3963	53.8667	30.8891	54.1979	0	21.8308	22.0424	22.8728	27.6355	19.9726	21.9535
Mpp6_chr6_50110241_50198939_(+)	Mpp6	chr6	50110241	50198939	+	410	185	441	195	401	192	436	216	125	96	201	170	167	138	159	146	101	117	258	249	238	169	188	188	219	217	210	203	233	183	75.5892	33.9104	81.8634	35.9794	78.8342	37.5361	88.1727	87.6632	50.5342	29.8038	62.1274	55.929	54.6791	34.0403
Mrps35_chr6_147042764_147073991_(+)	Mrps35	chr6	147042764	147073991	+	480	13	520	17	433	16	443	6	112	10	152	7	118	4	173	12	115	9	268	13	311	9	230	14	286	11	283	9	308	17	88.4946	2.3829	96.5283	3.13667	85.1252	3.12801	89.5883	2.43509	45.2786	3.10457	46.982	2.30296	38.6356	0.986675
Mtmr14_chr6_113237843_113281392_(+)	Mtmr14	chr6	113237843	113281392	+	93	47	95	56	106	46	88	50	31	28	46	32	34	44	61	64	36	36	52	78	57	43	27	54	48	71	33	49	62	56	17.1458	8.61509	17.635	10.3326	20.839	8.99302	17.7963	20.2924	12.5325	8.69279	14.2182	10.5278	11.1323	10.8534
Nanog_chr6_122707489_122714633_(+)	Nanog	chr6	122707489	122714633	+	591	356	653	356	501	301	730	364	111	82	200	142	133	122	228	188	203	146	865	892	692	703	282	501	361	557	804	843	764	804	108.959	65.2547	121.217	65.6855	98.4936	58.8456	147.629	147.729	44.8744	25.4574	61.8184	46.7171	43.5469	30.0936
Ndufb2_chr6_39592574_39603382_(+)	Ndufb2	chr6	39592574	39603382	+	80	76	93	99	76	79	95	92	11	26	12	31	11	20	13	45	14	23	86	115	85	141	59	109	48	130	74	116	91	138	14.7491	13.9308	17.2637	18.2665	14.9411	15.4445	19.2119	37.338	4.44701	8.07187	3.7091	10.1988	3.60162	4.93338
Nfu1_chr6_87009236_87028461_(+)	Nfu1	chr6	87009236	87028461	+	165	31	218	34	158	34	166	0	32	20	87	27	72	12	69	27	48	16	164	45	125	38	84	43	111	44	99	47	162	55	30.42	5.68229	40.4676	6.27334	31.0618	6.64701	33.5703	0	12.9368	6.20913	26.891	8.88283	23.5742	2.96003
Nr2c2_chr6_92091390_92174294_(+)	Nr2c2	chr6	92091390	92174294	+	327	96	355	91	369	110	236	1	122	50	163	83	141	76	162	80	117	52	257	133	190	97	155	127	210	121	204	99	211	106	60.287	17.5968	65.8991	16.7904	72.5432	21.505	47.7265	0.405848	49.3214	15.5228	50.382	27.3065	46.1662	18.7468
Nt5c3_chr6_56882400_56923932_(-)	Nt5c3	chr6	56882400	56923932	-	208	40	207	48	192	43	203	41	52	30	90	28	69	8	77	35	51	20	143	42	140	47	108	48	118	38	106	36	127	46	38.3477	7.33199	38.4257	8.85648	37.746	8.40652	41.0529	16.6398	21.0222	9.3137	27.8183	9.21183	22.592	1.97335
Nup210_chr6_91013068_91116829_(-)	Nup210	chr6	91013068	91116829	-	1241	0	1251	2	1156	1	638	1	429	1	598	0	449	0	606	1	449	1	711	0	632	0	571	2	700	0	645	0	727	1	228.796	0	232.225	0.36902	227.263	0.1955	129.023	0.405848	173.433	0.310457	184.837	0	147.012	0
Ogg1_chr6_113326972_113335068_(+)	Ogg1	chr6	113326972	113335068	+	55	3	40	8	32	6	31	5	5	3	10	2	6	4	8	1	8	6	33	7	11	6	25	11	27	4	23	7	22	5	10.14	0.549899	7.42525	1.47608	6.29101	1.173	6.26916	2.02924	2.02137	0.93137	3.09092	0.657988	1.96452	0.986675
Osbpl3_chr6_50293330_50456201_(-)	Osbpl3	chr6	50293330	50456201	-	347	108	311	93	270	76	244	66	147	75	203	99	176	77	213	139	190	88	262	173	203	134	165	110	217	129	259	151	229	173	63.9743	19.7964	57.7313	17.1594	53.0804	14.858	49.3443	26.786	59.4282	23.2842	62.7456	32.5704	57.6259	18.9935
Paip2b_chr6_83805401_83831741_(-)	Paip2b	chr6	83805401	83831741	-	153	55	182	49	146	56	120	0	43	17	42	24	40	23	68	28	49	14	114	54	93	54	96	60	99	61	99	63	93	58	28.2077	10.0815	33.7849	9.04099	28.7027	10.948	24.2677	0	17.3838	5.27776	12.9819	7.89585	13.0968	5.67338
Parp11_chr6_127446840_127494261_(+)	Parp11	chr6	127446840	127494261	+	42	5	31	7	25	3	32	7	8	2	9	5	7	5	21	8	14	2	29	9	29	7	15	7	18	6	22	7	34	14	7.74328	0.916499	5.75457	1.29157	4.91485	0.586501	6.47139	2.84094	3.23419	0.620913	2.78183	1.64497	2.29194	1.23334
Pde1c_chr6_56069804_56652487_(-)	Pde1c	chr6	56069804	56652487	-	68	9	79	11	101	9	71	12	28	7	54	14	33	13	55	14	32	14	31	11	54	17	36	16	63	17	44	11	41	19	12.5367	1.6497	14.6649	2.02961	19.856	1.7595	14.3584	4.87018	11.3197	2.1732	16.691	4.60591	10.8049	3.20669
Pex5_chr6_124396816_124415067_(-)	Pex5	chr6	124396816	124415067	-	204	2	252	3	227	2	256	6	76	5	131	4	81	7	151	5	117	2	232	5	226	9	179	3	220	8	198	7	215	5	37.6102	0.366599	46.7791	0.55353	44.6268	0.391001	51.7711	2.43509	30.7248	1.55228	40.491	1.31598	26.521	1.72668
Phc1_chr6_122317731_122340561_(-)	Phc1	chr6	122317731	122340561	-	936	356	1052	407	1039	400	953	379	355	244	467	290	378	312	555	430	370	311	837	570	737	617	663	583	771	590	714	482	759	586	172.565	65.2547	195.284	75.0955	204.261	78.2002	192.726	153.816	143.517	75.7514	144.346	95.4082	123.765	76.9607
Phf14_chr6_11907809_12081205_(+)	Phf14	chr6	11907809	12081205	+	415	330	404	323	399	311	386	348	131	128	181	241	137	225	127	187	121	168	315	273	305	245	267	312	236	307	254	271	276	265	76.511	60.4889	74.9951	59.5967	78.441	60.8006	78.0611	141.235	52.9598	39.7384	55.9456	79.2875	44.8565	55.5005
Plekha5_chr6_140424054_140597110_(+)	Plekha5	chr6	140424054	140597110	+	1165	85	1226	75	1107	74	1055	81	604	49	934	75	789	67	1056	95	888	63	1096	126	1007	104	956	107	1073	107	1002	84	1000	99	214.784	15.5805	227.584	13.8382	217.629	14.467	213.354	32.8737	244.181	15.2124	288.692	24.6745	258.334	16.5268
Plekha8_chr6_54595111_54645839_(+)	Plekha8	chr6	54595111	54645839	+	283	143	349	163	257	152	305	124	61	47	75	82	105	59	93	111	67	63	106	120	109	108	86	91	154	131	128	97	128	112	52.175	26.2119	64.7853	30.0751	50.5246	29.7161	61.6804	50.3252	24.6607	14.5915	23.1819	26.9775	34.3791	14.5535
Podxl_chr6_31519488_31563981_(-)	Podxl	chr6	31519488	31563981	-	214	58	186	41	233	58	146	23	73	21	103	35	58	31	89	41	54	27	101	45	138	36	103	85	104	57	90	23	101	36	39.4539	10.6314	34.5274	7.56491	45.8064	11.339	29.5257	9.33451	29.512	6.51959	31.8365	11.5148	18.9904	7.64673
Pole4_chr6_82618992_82705365_(-)	Pole4	chr6	82618992	82705365	-	418	99	383	104	344	84	446	1	101	62	245	97	174	91	338	175	197	114	502	237	477	217	239	157	359	172	496	231	497	203	77.0641	18.1467	71.0968	19.189	67.6283	16.422	90.195	0.405848	40.8316	19.2483	75.7275	31.9124	56.9711	22.4469
Pot1a_chr6_25743737_25809246_(-)	Pot1a	chr6	25743737	25809246	-	382	132	331	154	327	127	331	144	85	45	107	75	88	79	159	133	80	67	280	167	294	163	187	141	196	168	238	164	278	182	70.427	24.1956	61.444	28.4145	64.2862	24.8285	66.9384	58.4421	34.3633	13.9705	33.0728	24.6745	28.813	19.4868
Ppfibp1_chr6_146888487_147032025_(+)	Ppfibp1	chr6	146888487	147032025	+	726	40	709	39	624	26	520	24	239	14	335	20	291	15	301	30	231	16	350	33	413	30	348	31	464	30	308	22	380	21	133.848	7.33199	131.613	7.19589	122.675	5.08301	105.16	9.74036	96.6214	4.34639	103.546	6.57988	95.2792	3.70003
Ppm1k_chr6_57506502_57535468_(-)	Ppm1k	chr6	57506502	57535468	-	49	15	60	11	46	4	66	15	11	4	27	10	13	11	34	15	26	7	64	26	55	34	22	19	63	30	47	30	61	30	9.03383	2.7495	11.1379	2.02961	9.04332	0.782002	13.3472	6.08772	4.44701	1.24183	8.34548	3.28994	4.25646	2.71336
Ppp1r9a_chr6_4902917_5165661_(+)	Ppp1r9a	chr6	4902917	5165661	+	968	772	861	760	863	716	984	751	310	652	585	982	364	848	396	1125	362	796	659	1209	581	1059	345	1033	433	1135	512	1083	506	1005	178.464	141.507	159.829	140.228	169.661	139.978	198.995	304.792	125.325	202.418	180.819	323.072	119.181	209.175
Prdm5_chr6_65778988_65937010_(+)	Prdm5	chr6	65778988	65937010	+	1284	363	1330	357	1223	364	1153	393	464	220	943	455	627	305	899	577	580	341	995	606	1207	655	833	555	988	587	881	534	1122	664	236.723	66.5378	246.89	65.87	240.434	71.1621	233.172	159.498	187.583	68.3005	291.474	149.692	205.292	75.234
Prickle2_chr6_92370908_92706155_(-)	Prickle2	chr6	92370908	92706155	-	164	45	163	23	142	36	138	1	36	45	86	56	67	41	76	43	59	39	56	61	59	52	63	66	97	82	68	54	74	57	30.2357	8.24849	30.2579	4.24373	27.9163	7.03801	27.9079	0.405848	14.5539	13.9705	26.5819	18.4237	21.9371	10.1134
Pyroxd1_chr6_142345654_142363257_(+)	Pyroxd1	chr6	142345654	142363257	+	113	29	100	35	80	31	84	28	25	11	34	9	33	22	49	14	36	5	64	45	56	42	53	51	60	27	59	42	89	38	20.8331	5.31569	18.5631	6.45785	15.7275	6.06051	16.9874	11.3637	10.1068	3.41502	10.5091	2.96094	10.8049	5.42671
Pyurf_chr6_57686576_57692078_(-)	Pyurf	chr6	57686576	57692078	-	40	2	66	3	38	1	43	0	4	0	7	2	5	3	5	3	10	1	19	7	27	3	16	2	22	3	16	4	20	0	7.37455	0.366599	12.2517	0.55353	7.47057	0.1955	8.69593	0	1.61709	0	2.16364	0.657988	1.6371	0.740006
Rad18_chr6_112619850_112696686_(-)	Rad18	chr6	112619850	112696686	-	889	364	1073	440	881	341	908	303	241	136	390	204	353	216	419	275	311	228	489	299	465	301	469	305	526	330	435	263	485	335	163.899	66.7211	199.182	81.1844	173.199	66.6656	183.626	122.972	97.43	42.2221	120.546	67.1148	115.579	53.2805
Rad51ap1_chr6_126923050_126939587_(-)	Rad51ap1	chr6	126923050	126939587	-	40	20	32	18	32	10	41	16	11	10	12	8	8	6	16	8	9	8	23	17	27	21	20	16	27	20	23	20	30	24	7.37455	3.66599	5.9402	3.32118	6.29101	1.955	8.29147	6.49357	4.44701	3.10457	3.7091	2.63195	2.61936	1.48001
Raf1_chr6_115618067_115676635_(-)	Raf1	chr6	115618067	115676635	-	588	160	640	146	639	171	556	129	201	77	299	97	359	91	374	104	261	97	597	166	444	131	411	134	479	123	497	119	520	134	108.406	29.328	118.804	26.9384	125.624	33.4306	112.44	52.3544	81.259	23.9052	92.4184	31.9124	117.544	22.4469
Rassf4_chr6_116633008_116673952_(-)	Rassf4	chr6	116633008	116673952	-	72	31	60	27	43	13	42	14	12	11	14	23	3	16	34	43	24	34	20	32	54	48	16	29	28	30	21	28	33	56	13.2742	5.68229	11.1379	4.98177	8.45354	2.54151	8.4937	5.68187	4.85128	3.41502	4.32728	7.56686	0.98226	3.9467
Rassf8_chr6_145746748_145821079_(+)	Rassf8	chr6	145746748	145821079	+	156	46	132	51	143	40	130	30	37	24	59	38	45	28	69	64	41	41	61	59	74	62	45	40	88	55	68	50	81	58	28.7608	8.43179	24.5033	9.41001	28.1129	7.82002	26.29	12.1754	14.9581	7.45096	18.2364	12.5018	14.7339	6.90673
Rbsn_chr6_92186712_92214925_(-)	Rbsn	chr6	92186712	92214925	-	264	115	254	99	229	83	233	0	50	31	69	49	54	38	83	66	52	35	150	102	140	118	94	100	116	96	127	91	164	109	48.6721	21.0795	47.1504	18.2665	45.02	16.2265	47.1198	0	20.2137	9.62416	21.3273	16.1207	17.6807	9.37342
Recql_chr6_142350342_142387087_(-)	Recql	chr6	142350342	142387087	-	184	33	165	30	141	21	215	27	45	5	84	18	55	19	124	15	67	16	178	59	167	46	157	45	175	52	163	38	206	41	33.9229	6.04889	30.6292	5.5353	27.7197	4.10551	43.4796	10.9579	18.1923	1.55228	25.9637	5.92189	18.0081	4.68671
Reep1_chr6_71707561_71810710_(+)	Reep1	chr6	71707561	71810710	+	81	15	39	6	59	7	53	0	15	4	24	5	11	1	13	7	13	2	23	6	22	4	13	10	16	7	11	10	27	9	14.9335	2.7495	7.23962	1.10706	11.599	1.3685	10.7182	0	6.0641	1.24183	7.4182	1.64497	3.60162	0.246669
Rhno1_chr6_128357000_128362911_(-)	Rhno1	chr6	128357000	128362911	-	142	104	111	87	106	82	119	96	39	47	45	39	27	47	70	63	29	52	72	98	71	84	60	99	65	90	53	87	65	105	26.1797	19.0632	20.6051	16.0524	20.839	16.031	24.0655	38.9614	15.7667	14.5915	13.9091	12.8308	8.84034	11.5934
Rimklb_chr6_122447296_122498761_(-)	Rimklb	chr6	122447296	122498761	-	353	71	425	105	403	95	377	68	110	24	175	65	160	61	234	95	161	61	394	104	344	116	192	77	236	105	317	118	371	126	65.0804	13.0143	78.8933	19.3735	79.2274	18.5725	76.241	27.5977	44.4701	7.45096	54.0911	21.3846	52.3872	15.0468
Rmnd5a_chr6_71388634_71440637_(-)	Rmnd5a	chr6	71388634	71440637	-	291	62	341	53	315	42	213	0	92	21	143	38	89	41	168	67	111	30	232	58	239	46	152	57	198	73	198	60	222	65	53.6499	11.3646	63.3003	9.77903	61.9271	8.21102	43.0752	0	37.1932	6.51959	44.2001	12.5018	29.1404	10.1134
Rpa3_chr6_8255936_8259173_(-)	Rpa3	chr6	8255936	8259173	-	85	96	99	101	91	90	85	109	6	18	14	27	10	32	6	23	4	24	85	164	98	160	66	132	59	125	82	132	111	192	15.6709	17.5968	18.3775	18.6355	17.89	17.595	17.1896	44.2374	2.42564	5.58822	4.32728	8.88283	3.2742	7.8934
Rpusd3_chr6_113415319_113419340_(-)	Rpusd3	chr6	113415319	113419340	-	30	5	30	4	23	12	24	7	1	6	9	3	4	2	7	6	7	7	15	6	20	13	15	9	15	10	15	2	23	8	5.53092	0.916499	5.56894	0.73804	4.52166	2.346	4.85354	2.84094	0.404274	1.86274	2.78183	0.986982	1.30968	0.493338
Rybp_chr6_100228565_100287485_(-)	Rybp	chr6	100228565	100287485	-	518	147	536	152	448	143	371	0	136	55	201	105	195	98	217	86	174	77	422	215	332	148	269	163	305	182	377	194	361	156	95.5005	26.9451	99.4984	28.0455	88.0741	27.9566	75.0277	0	54.9812	17.0751	62.1274	34.5444	63.8469	24.1735
Scrn1_chr6_54501173_54566489_(-)	Scrn1	chr6	54501173	54566489	-	103	4	193	4	145	3	146	1	29	3	28	3	17	2	29	3	28	5	18	1	41	1	16	3	40	1	19	1	27	2	18.9895	0.733199	35.8268	0.73804	28.5061	0.586501	29.5257	0.405848	11.7239	0.93137	8.65457	0.986982	5.56614	0.493338
Sdhaf3_chr6_6956004_7042979_(+)	Sdhaf3	chr6	6956004	7042979	+	135	118	155	93	136	97	152	87	48	51	88	81	66	86	96	109	63	76	214	255	222	187	151	182	146	184	187	190	183	203	24.8891	21.6294	28.7729	17.1594	26.7368	18.9635	30.7391	35.3088	19.4051	15.8333	27.2001	26.6485	21.6097	21.2135
Setd5_chr6_113077365_113153435_(+)	Setd5	chr6	113077365	113153435	+	806	348	728	383	710	404	649	318	224	171	387	258	329	234	291	257	211	196	391	361	294	272	316	320	423	373	359	332	357	308	148.597	63.7883	135.14	70.6673	139.582	78.9822	131.248	129.06	90.5573	53.0881	119.619	84.8804	107.721	57.7205
Shq1_chr6_100568256_100671157_(-)	Shq1	chr6	100568256	100671157	-	455	122	495	141	442	133	330	0	148	59	212	71	197	86	282	138	173	83	498	232	414	176	390	200	383	185	454	182	427	226	83.8855	22.3626	91.8875	26.0159	86.8945	26.0016	66.7362	0	59.8325	18.3169	65.5275	23.3586	64.5017	21.2135
Sinhcaf_chr6_148921035_148946467_(-)	Sinhcaf	chr6	148921035	148946467	-	340	203	376	210	381	201	332	212	156	109	223	143	159	149	127	141	132	103	241	227	193	185	187	289	222	268	201	210	206	222	62.6837	37.2098	69.7974	38.7471	74.9023	39.2956	67.1407	86.0398	63.0667	33.8398	68.9275	47.0461	52.0598	36.7537
Skap2_chr6_51857422_52012549_(-)	Skap2	chr6	51857422	52012549	-	309	82	331	84	327	65	312	77	105	42	169	57	124	62	194	114	149	71	229	119	238	112	150	103	221	96	243	87	271	119	56.9684	15.0306	61.444	15.4988	64.2862	12.7075	63.096	31.2503	42.4487	13.0392	52.2365	18.7527	40.6001	15.2935
Slc25a13_chr6_6041218_6217173_(-)	Slc25a13	chr6	6041218	6217173	-	1269	1502	1602	1762	1341	1501	1586	2018	325	810	562	1311	401	1111	609	2033	409	1225	1037	3021	865	2405	492	1598	521	2028	812	2401	819	2399	233.958	275.316	297.381	325.106	263.632	293.446	320.738	819.002	131.389	251.47	173.71	431.311	131.295	274.049
Slc25a26_chr6_94500331_94604672_(+)	Slc25a26	chr6	94500331	94604672	+	364	141	384	135	418	128	276	0	92	77	185	84	148	74	146	102	132	75	274	179	196	107	213	139	216	146	203	150	205	168	67.1084	25.8453	71.2824	24.9088	82.1763	25.0241	55.8157	0	37.1932	23.9052	57.182	27.6355	48.4582	18.2535
Slc2a3_chr6_122727809_122801640_(-)	Slc2a3	chr6	122727809	122801640	-	1965	273	1653	253	1398	241	1225	166	391	162	891	256	456	154	762	309	582	223	1098	319	1117	312	481	206	807	320	922	215	1105	316	362.275	50.0408	306.849	46.681	274.838	47.1156	247.733	67.3708	158.071	50.294	275.401	84.2224	149.304	37.987
Slc35b4_chr6_34153380_34177111_(-)	Slc35b4	chr6	34153380	34177111	-	155	35	163	33	157	33	165	31	48	6	45	20	46	11	43	18	48	12	127	38	114	19	75	24	115	35	93	35	92	22	28.5764	6.41549	30.2579	6.08883	30.8652	6.45151	33.3681	12.5813	19.4051	1.86274	13.9091	6.57988	15.0613	2.71336
Slc4a5_chr6_83219828_83304945_(+)	Slc4a5	chr6	83219828	83304945	+	89	11	36	1	31	5	47	0	12	7	20	2	20	7	32	4	14	4	112	8	107	19	40	8	60	14	111	16	93	13	16.4084	2.0163	6.68273	0.18451	6.09441	0.977502	9.50485	0	4.85128	2.1732	6.18184	0.657988	6.5484	1.72668
Slc6a6_chr6_91684053_91759066_(+)	Slc6a6	chr6	91684053	91759066	+	718	228	715	270	713	232	571	0	253	128	414	177	277	145	407	251	331	179	507	285	480	256	339	255	438	228	428	252	492	244	132.373	41.7923	132.726	49.8177	140.171	45.3561	115.474	0	102.281	39.7384	127.964	58.2319	90.6953	35.767
Smo_chr6_29735503_29761365_(+)	Smo	chr6	29735503	29761365	+	63	72	38	39	58	35	38	22	26	34	40	48	29	37	35	41	25	40	25	21	34	24	31	37	36	50	30	27	35	40	11.6149	13.1976	7.05399	7.19589	11.4024	6.84251	7.68477	8.92866	10.5111	10.5555	12.3637	15.7917	9.49518	9.12675
Smyd1_chr6_71213940_71322233_(-)	Smyd1	chr6	71213940	71322233	-	20	6	17	3	14	8	18	0	5	3	2	3	0	1	4	3	1	3	10	24	5	13	2	4	3	4	9	18	5	14	3.68728	1.0998	3.15573	0.55353	2.75231	1.564	3.64016	0	2.02137	0.93137	0.618184	0.986982	0	0.246669
Snd1_chr6_28475139_28935162_(+)	Snd1	chr6	28475139	28935162	+	2521	733	2377	694	1931	572	2078	657	930	399	1373	542	1035	504	1302	620	947	454	2270	921	1870	745	1633	777	1651	821	1951	777	1897	748	464.781	134.359	441.246	128.05	379.623	111.826	420.236	266.642	375.975	123.872	424.383	178.315	338.88	124.321
Snx10_chr6_51523901_51590679_(+)	Snx10	chr6	51523901	51590679	+	547	103	562	116	572	108	586	123	206	83	289	98	286	111	404	154	310	112	600	214	511	158	464	149	532	182	480	166	539	210	100.847	18.8799	104.325	21.4031	112.452	21.114	118.507	49.9193	83.2804	25.7679	89.3275	32.2414	93.6421	27.3802
Sox5_chr6_143828425_144781977_(-)	Sox5	chr6	143828425	144781977	-	106	18	108	23	104	20	76	2	34	15	57	22	40	19	40	15	43	14	41	23	63	11	39	26	52	20	24	11	19	13	19.5426	3.29939	20.0482	4.24373	20.4458	3.91001	15.3695	0.811696	13.7453	4.65685	17.6182	7.23787	13.0968	4.68671
Srgap3_chr6_112717971_112947266_(-)	Srgap3	chr6	112717971	112947266	-	219	106	205	91	188	100	160	88	123	125	175	169	146	101	179	183	173	144	173	168	199	152	116	129	164	151	169	158	193	173	40.3757	19.4298	38.0544	16.7904	36.9597	19.55	32.3569	35.7146	49.7257	38.8071	54.0911	55.6	47.8033	24.9136
St7_chr6_17692933_17943025_(+)	St7	chr6	17692933	17943025	+	142	154	146	107	135	120	109	109	38	68	46	99	34	87	25	62	24	55	43	67	46	57	31	105	36	123	22	71	36	62	26.1797	28.2282	27.1022	19.7426	26.5402	23.46	22.0432	44.2374	15.3624	21.1111	14.2182	32.5704	11.1323	21.4602
Stk38l_chr6_146724995_146778812_(+)	Stk38l	chr6	146724995	146778812	+	281	39	284	47	292	36	340	42	107	19	137	33	133	16	168	28	125	27	318	51	246	40	249	38	300	54	266	51	258	45	51.8062	7.14869	52.7193	8.67197	57.4054	7.03801	68.7585	17.0456	43.2573	5.89868	42.3456	10.8568	43.5469	3.9467
Strap_chr6_137735078_137751932_(+)	Strap	chr6	137735078	137751932	+	1136	59	1193	52	1059	71	1144	61	188	15	298	31	299	18	345	22	270	22	759	86	745	87	506	73	643	82	660	89	768	72	209.437	10.8147	221.458	9.59452	208.193	13.8805	231.352	24.7567	76.0034	4.65685	92.1094	10.1988	97.8986	4.44004
Suclg2_chr6_95473009_95718800_(-)	Suclg2	chr6	95473009	95718800	-	1517	346	1786	367	1645	320	1017	0	424	143	701	214	611	179	701	278	535	171	1051	416	913	329	798	370	952	381	872	330	857	362	279.68	63.4217	331.538	67.7151	323.397	62.5601	205.669	0	171.412	44.3953	216.673	70.4047	200.054	44.1537
Tada3_chr6_113366025_113377883_(-)	Tada3	chr6	113366025	113377883	-	215	54	246	70	198	68	267	90	54	35	64	27	68	39	73	62	57	25	157	96	117	89	103	103	135	111	113	77	128	99	39.6382	9.89818	45.6653	12.9157	38.9256	13.294	53.9957	36.5263	21.8308	10.866	19.7819	8.88283	22.2646	9.62008
Tafa4_chr6_96831203_97060413_(-)	Tafa4	chr6	96831203	97060413	-	94	7	61	6	76	12	69	0	18	3	35	13	31	8	40	23	8	12	29	19	43	16	45	27	49	19	22	14	37	29	17.3302	1.2831	11.3235	1.10706	14.9411	2.346	13.9539	0	7.27693	0.93137	10.8182	4.27692	10.15	1.97335
Tamm41_chr6_115004381_115037876_(-)	Tamm41	chr6	115004381	115037876	-	165	152	134	116	129	159	185	157	39	75	69	85	30	71	56	145	47	86	74	163	93	161	55	168	81	181	80	126	83	208	30.42	27.8616	24.8746	21.4031	25.3606	31.0846	37.4127	63.7182	15.7667	23.2842	21.3273	27.9645	9.8226	17.5135
Tatdn2_chr6_113697050_113711069_(+)	Tatdn2	chr6	113697050	113711069	+	136	94	116	118	107	99	121	88	16	38	40	47	19	32	32	44	16	47	47	79	36	71	48	74	35	74	31	80	39	82	25.0735	17.2302	21.5332	21.7722	21.0355	19.3545	24.4699	35.7146	6.46838	11.7974	12.3637	15.4627	6.22098	7.8934
Tax1bp1_chr6_52713729_52766780_(+)	Tax1bp1	chr6	52713729	52766780	+	394	135	483	144	398	128	454	114	102	45	158	80	120	61	159	110	99	55	328	131	285	139	230	114	280	156	296	116	329	134	72.6394	24.7455	89.6599	26.5694	78.2444	25.0241	91.8128	46.2667	41.2359	13.9705	48.8365	26.3195	39.2904	15.0468
Tes_chr6_17065149_17105828_(+)	Tes	chr6	17065149	17105828	+	155	131	136	143	121	100	101	67	23	48	38	78	18	61	30	97	16	75	43	93	51	92	17	102	32	120	35	85	45	85	28.5764	24.0123	25.2459	26.3849	23.7879	19.55	20.4253	27.1918	9.29829	14.9019	11.7455	25.6615	5.89356	15.0468
Tet3_chr6_83362373_83459084_(-)	Tet3	chr6	83362373	83459084	-	152	119	119	78	121	77	42	0	33	38	46	47	16	43	21	41	15	35	33	52	36	21	22	95	32	67	28	45	27	45	28.0233	21.8127	22.0901	14.3918	23.7879	15.0535	8.4937	0	13.341	11.7974	14.2182	15.4627	5.23872	10.6068
Thumpd3_chr6_113046225_113068273_(+)	Thumpd3	chr6	113046225	113068273	+	197	42	221	42	195	50	203	46	28	12	50	31	59	26	68	36	32	16	120	67	113	67	70	56	127	55	110	61	120	59	36.3197	7.69859	41.0245	7.74942	38.3358	9.77502	41.0529	18.669	11.3197	3.72548	15.4546	10.1988	19.3178	6.41339
Tigar_chr6_127085116_127109557_(-)	Tigar	chr6	127085116	127109557	-	257	115	314	130	236	113	363	145	55	44	98	66	60	53	61	67	53	54	258	188	148	158	86	105	157	121	198	151	180	166	47.3815	21.0795	58.2882	23.9863	46.3962	22.0915	73.4098	58.848	22.2351	13.6601	30.291	21.7136	19.6452	13.0734
Tmcc1_chr6_116018611_116193486_(-)	Tmcc1	chr6	116018611	116193486	-	178	74	177	48	163	59	152	57	85	41	129	54	74	66	92	69	74	53	151	96	142	81	126	99	148	112	153	80	107	100	32.8168	13.5642	32.8567	8.85648	32.0448	11.5345	30.7391	23.1333	34.3633	12.7287	39.8728	17.7657	24.2291	16.2801
Tmem178b_chr6_39871461_40255150_(+)	Tmem178b	chr6	39871461	40255150	+	27	22	45	16	39	21	39	7	25	16	56	26	36	17	26	22	27	17	31	12	17	15	15	21	32	19	17	12	16	14	4.97782	4.03259	8.35341	2.95216	7.66716	4.10551	7.88701	2.84094	10.1068	4.96731	17.3091	8.55384	11.7871	4.19337
Tmf1_chr6_97152997_97179122_(-)	Tmf1	chr6	97152997	97179122	-	180	40	209	54	202	50	109	0	49	29	56	22	53	27	92	41	48	22	103	47	122	57	70	47	86	49	79	49	110	44	33.1855	7.33199	38.7969	9.96354	39.712	9.77502	22.0432	0	19.8094	9.00324	17.3091	7.23787	17.3533	6.66006
Tmtc1_chr6_148232430_148444389_(-)	Tmtc1	chr6	148232430	148444389	-	108	38	130	34	105	34	89	32	35	16	57	41	44	27	60	37	38	33	80	49	45	55	41	42	50	54	54	52	64	50	19.9113	6.96539	24.1321	6.27334	20.6424	6.64701	17.9986	12.9871	14.1496	4.96731	17.6182	13.4887	14.4065	6.66006
Tpk1_chr6_43345001_43666278_(-)	Tpk1	chr6	43345001	43666278	-	773	113	1043	136	914	113	902	134	165	57	339	120	281	83	346	152	230	73	629	145	488	153	470	173	506	197	524	137	531	183	142.513	20.7129	193.613	25.0933	179.687	22.0915	182.412	54.3837	66.7052	17.696	104.782	39.4793	92.005	20.4735
Trh_chr6_92242061_92244650_(-)	Trh	chr6	92242061	92244650	-	765	321	747	313	668	277	650	2	136	80	235	139	106	106	100	116	127	98	172	280	181	227	95	381	280	209	114	202	160	274	141.038	58.8392	138.667	57.7516	131.325	54.1536	131.45	0.811696	54.9812	24.8365	72.6366	45.7301	34.7065	26.1469
Tsen2_chr6_115544664_115578628_(+)	Tsen2	chr6	115544664	115578628	+	233	131	243	136	263	135	251	150	108	57	146	86	108	72	160	153	146	89	262	212	287	216	191	176	216	201	239	155	266	206	42.9568	24.0123	45.1084	25.0933	51.7042	26.3926	50.76	60.8772	43.6616	17.696	45.1274	28.2935	35.3614	17.7602
Tspan9_chr6_127961396_128143594_(-)	Tspan9	chr6	127961396	128143594	-	388	121	415	152	363	111	307	106	91	88	137	104	108	102	121	146	103	122	167	190	101	119	109	130	139	138	166	169	161	140	71.5332	22.1793	77.037	28.0455	71.3636	21.7005	62.0849	43.0199	36.7889	27.3202	42.3456	34.2154	35.3614	25.1602
Tulp3_chr6_128321161_128355851_(-)	Tulp3	chr6	128321161	128355851	-	433	94	388	78	352	69	387	90	148	34	195	52	155	30	208	78	197	48	242	70	273	78	267	73	287	88	232	79	296	81	79.8295	17.2302	72.025	14.3918	69.2011	13.4895	78.2634	36.5263	59.8325	10.5555	60.2729	17.1077	50.7501	7.40006
Uba3_chr6_97183670_97205647_(-)	Uba3	chr6	97183670	97205647	-	546	246	609	270	503	232	391	0	83	91	151	135	124	139	159	157	116	110	299	283	309	284	186	232	305	285	242	221	283	273	100.663	45.0917	113.049	49.8177	98.8867	45.3561	79.0723	0	33.5547	28.2516	46.6729	44.4142	40.6001	34.287
Umad1_chr6_8259288_8459470_(+)	Umad1	chr6	8259288	8459470	+	142	165	126	142	133	117	149	120	44	95	79	118	57	117	42	123	50	109	116	210	97	156	75	174	64	211	91	212	95	186	26.1797	30.2445	23.3895	26.2004	26.147	22.8735	30.1324	48.7018	17.788	29.4934	24.4183	38.8213	18.6629	28.8603
Vgll4_chr6_114860628_114969994_(-)	Vgll4	chr6	114860628	114969994	-	239	130	296	139	171	101	357	164	65	79	72	96	40	74	41	101	35	73	52	124	41	81	25	101	61	138	45	91	57	93	44.063	23.829	54.9469	25.6469	33.6176	19.7455	72.1964	66.5591	26.2778	24.5261	22.2546	31.5834	13.0968	18.2535
Vhl_chr6_113623959_113631633_(+)	Vhl	chr6	113623959	113631633	+	72	13	74	15	89	12	73	10	19	3	18	10	13	5	23	12	16	8	37	18	51	18	31	12	42	20	40	12	54	24	13.2742	2.3829	13.7367	2.76765	17.4969	2.346	14.7629	4.05848	7.6812	0.93137	5.56365	3.28994	4.25646	1.23334
Vopp1_chr6_57727807_57825159_(-)	Vopp1	chr6	57727807	57825159	-	122	17	90	18	93	17	60	16	23	10	33	10	11	10	19	11	20	15	23	5	16	5	27	16	35	16	16	6	28	14	22.4924	3.1161	16.7068	3.32118	18.2832	3.32351	12.1339	6.49357	9.29829	3.10457	10.2	3.28994	3.60162	2.46669
Vwf_chr6_125546774_125686679_(+)	Vwf	chr6	125546774	125686679	+	21	1	11	2	10	2	27	2	6	1	3	3	6	2	16	3	7	6	20	9	13	10	3	0	14	6	15	4	12	12	3.87164	0.1833	2.04194	0.36902	1.96594	0.391001	5.46023	0.811696	2.42564	0.310457	0.927275	0.986982	1.96452	0.493338
Washc2_chr6_116208038_116262686_(+)	Washc2	chr6	116208038	116262686	+	320	88	336	76	289	52	288	53	128	44	153	55	137	33	134	64	131	46	179	81	194	65	164	84	210	71	166	62	198	61	58.9964	16.1304	62.3721	14.0228	56.8156	10.166	58.2425	21.51	51.747	13.6601	47.291	18.0947	44.8565	8.14007
Wbp11_chr6_136813654_136828233_(-)	Wbp11	chr6	136813654	136828233	-	559	88	612	91	506	88	524	57	139	17	172	39	156	31	217	43	169	24	398	161	395	130	328	101	389	132	318	142	415	127	103.059	16.1304	113.606	16.7904	99.4765	17.204	105.969	23.1333	56.194	5.27776	53.1638	12.8308	51.0775	7.64673
Wnt5b_chr6_119432531_119544347_(-)	Wnt5b	chr6	119432531	119544347	-	62	25	48	24	42	25	36	23	18	20	23	27	17	22	18	20	18	26	9	14	13	11	18	27	20	27	4	14	11	15	11.4306	4.58249	8.9103	4.42824	8.25694	4.88751	7.28031	9.33451	7.27693	6.20913	7.10911	8.88283	5.56614	5.42671
Ybx3_chr6_131364855_131388476_(-)	Ybx3	chr6	131364855	131388476	-	940	234	1102	272	932	228	1067	250	292	75	380	123	327	118	430	119	322	130	761	272	652	176	525	185	565	230	667	195	723	197	173.302	42.8921	204.566	50.1867	183.226	44.5741	215.78	101.462	118.048	23.2842	117.455	40.4662	107.066	29.1069
Zfand4_chr6_116264222_116330302_(+)	Zfand4	chr6	116264222	116330302	+	46	4	53	5	35	12	35	4	8	4	20	2	5	8	19	13	13	8	14	11	21	14	20	12	23	16	14	10	20	9	8.48074	0.733199	9.83846	0.92255	6.88079	2.346	7.07808	1.62339	3.23419	1.24183	6.18184	0.657988	1.6371	1.97335
Zfp239_chr6_117862100_117873291_(+)	Zfp239	chr6	117862100	117873291	+	139	46	143	25	121	21	127	26	43	18	48	17	54	12	37	33	32	12	115	31	123	26	67	23	77	27	94	23	89	36	25.6266	8.43179	26.5453	4.61275	23.7879	4.10551	25.6833	10.5521	17.3838	5.58822	14.8364	5.5929	17.6807	2.96003
Zfp248_chr6_118427319_118455528_(-)	Zfp248	chr6	118427319	118455528	-	87	58	74	50	79	56	73	65	11	28	28	29	17	20	13	42	10	26	18	61	18	48	21	66	35	70	20	63	27	67	16.0397	10.6314	13.7367	9.2255	15.5309	10.948	14.7629	26.3801	4.44701	8.69279	8.65457	9.54082	5.56614	4.93338
Zfp398_chr6_47835661_47873537_(+)	Zfp398	chr6	47835661	47873537	+	93	57	91	56	81	29	97	54	22	29	33	24	17	9	29	31	32	27	51	33	65	45	43	39	37	44	46	37	52	57	17.1458	10.4481	16.8925	10.3326	15.9241	5.66951	19.6164	21.9158	8.89402	9.00324	10.2	7.89585	5.56614	2.22002
Zfp422_chr6_116624016_116628999_(-)	Zfp422	chr6	116624016	116628999	-	130	1	104	1	107	0	81	0	12	1	22	0	31	0	22	0	10	0	40	0	33	0	34	0	45	0	28	0	35	0	23.9673	0.1833	19.3057	0.18451	21.0355	0	16.3807	0	4.85128	0.310457	6.80002	0	10.15	0
Zfp777_chr6_48024188_48048911_(-)	Zfp777	chr6	48024188	48048911	-	160	57	176	61	183	67	171	63	53	27	68	27	88	30	69	50	60	26	90	40	61	38	86	40	86	52	65	43	91	38	29.4982	10.4481	32.6711	11.2551	35.9767	13.0985	34.5815	25.5684	21.4265	8.38233	21.0182	8.88283	28.813	7.40006
Zfp783_chr6_47943171_47955913_(+)	Zfp783	chr6	47943171	47955913	+	48	5	52	9	42	3	35	10	9	3	7	2	15	1	7	3	11	5	13	1	15	4	20	4	14	6	18	2	20	3	8.84946	0.916499	9.65283	1.66059	8.25694	0.586501	7.07808	4.05848	3.63846	0.93137	2.16364	0.657988	4.9113	0.246669
Zfp800_chr6_28239927_28398005_(-)	Zfp800	chr6	28239927	28398005	-	70	37	66	18	99	45	56	30	13	10	28	13	15	15	22	16	14	17	37	35	30	27	23	13	18	20	36	17	38	21	12.9055	6.78209	12.2517	3.32118	19.4628	8.79752	11.3249	12.1754	5.25556	3.10457	8.65457	4.27692	4.9113	3.70003
Zfp862-ps_chr6_48504337_48534832_(+)	Zfp862-ps	chr6	48504337	48534832	+	86	26	126	23	112	24	118	33	23	19	40	21	35	15	32	17	36	13	69	33	68	25	70	42	61	39	53	22	72	35	15.8553	4.76579	23.3895	4.24373	22.0185	4.69201	23.8632	13.393	9.29829	5.89868	12.3637	6.90887	11.4597	3.70003
Znrf2_chr6_54816916_54893500_(+)	Znrf2	chr6	54816916	54893500	+	504	319	552	368	548	344	566	362	137	128	204	220	195	220	242	291	178	220	414	456	390	440	237	342	320	393	340	430	370	437	92.9194	58.4726	102.468	67.8996	107.733	67.2521	114.463	146.917	55.3855	39.7384	63.0547	72.3787	63.8469	54.2671
[truncated: 34 more columns]
