# Supplementary material
Source: HighWire-hosted journal article supplement (doi:10.1101/rna.079569.122)
Supplement: Supplemental_Table_S10.xlsx [file Supplemental_Table_S10.xlsx]

## Sheet: Oligos
Name	F/R?	Sequence(5'-->3')	Use/target	Annealing Temp ©	Extension Time (s)	Use
gRC8F	F	caccgCGTGGCCATGTGATCCCACG	Safb1 guide to 3' end. Pair with gRC8R	-		SAFB/SAFB2 Knockout
gRC8R	R	aaacCGTGGGATCACATGGCCACGc	Safb1 guide to 3' end. Pair with gRC8F	-		SAFB/SAFB2 Knockout
gRC9F	F	caccgGCTTAGGTGCTCAATAGCGG	Safb1 guide to 3' end. Pair with gRC9R	-		SAFB/SAFB2 Knockout
gRC9R	R	aaacCCGCTATTGAGCACCTAAGc	Safb1 guide to 3' end. Pair with gRC9F	-		SAFB/SAFB2 Knockout
gRC12F	F	caccgCAGGGCTATATTGTGCCCAG	Safb2 guide to 3' end. Pair with gRC12R	-		SAFB/SAFB2 Knockout
gRC12R	R	aaacCTGGGCACAATATAGCCCTGc	Safb2 guide to 3' end. Pair with gRC12F	-		SAFB/SAFB2 Knockout
gRC13F	F	caccgGGTTAGGAACTCGGCCACCC	Safb2 guides to 3' end. Pair with gRC13R	-		SAFB/SAFB2 Knockout
gRC13R	R	aaacGGGTGGCCGAGTTCCTAACCc	Safb2 guides to 3' end. Pair with gRC13F	-		SAFB/SAFB2 Knockout
RC4F	F	acattgttggagccgaaatc	No band if hygroB is losgt. If hygro is present, ~383bp band. Pair with RC4R.	58C		Hygromycin B gene deletion genotype PCR
RC4R	R	gtgcttgacattggggagtt	No band if hygroB is losgt. If hygro is present, ~383bp band. Pair with RC4F.	58C		Hygromycin B gene deletion genotype PCR
RC6F	F	cagatggctggcaactagaa	Check Rosa26 line for FLP loss of hygro. no hygro, ~398 bp. hygro, ~2kb. Pair with RC6R	58C		Hygromycin B gene deletion genotype PCR
RC6R	R	tactcgcatccattctcagg	Check Rosa26 line for FLP loss of hygro. no hygro, ~398 bp. hygro, ~2kb. Pair with RC6F	58C		Hygromycin B gene deletion genotype PCR
RC11R	R	ccaggaccactctcagcaat	Flanking genotyping primer to determine SAFB1 KO, band if wt. Pair with RC13F.	62.5C		Genotype PCR
RC13F	F	TGGTGAGAGGAGCATGTCTG	3' internal genotyping primer to determine SAFB1 KO, band if wt. Pair with RC11R.	62.5C		Genotype PCR
RC41R	R	ATCGACACTTGGCAGAACCTG	Flanking genotyping primers to determine SAFB2 KO, band if wt. Pair with RC44F.	58C		Genotype PCR
RC44F	F	ggcatggcccttgcaaactat	3' internal genotyping primer to determine SAFB2 KO, band if wt. Pair with RC41R.	58C		Genotype PCR
RC59F	F	gcagaatgcctggcagcagaa	3' end of SAFB2 gene genotyping primer for safb1/2 dko, band if dko. Pair with RC60R	62.5C		Genotype PCR
RC60R	R	gtgccactttcctcatggaaa	3' end of SAFB1 gene genotyping primer for safb1/2 dko, band if dko. Pair with RC59F	62.5C		Genotype PCR
RC62F	F	GAGATTGAGTGAAGGCCGGG	Primer to SAFB1 RNA, Exon 18. Pair with RC62R. Product size ~201bp.	-		qPCR
RC62R	R	ATGCCACCACGGTTCATCA	Primer to SAFB1 RNA, Exon 20. Pair with RC62F. Product size ~201bp.	-		qPCR
RC64F	F	CTTTCCACGGCCAGATCACC	Primer to SAFB2 RNA, Exon 16. Pair with RC64R. Product size ~172bp	-		qPCR
RC64R	R	AGCATGGTGCTCTAGGAGCC	Primer to SAFB2 RNA, Exon 18. Pair with RC64F. Product size ~172bp	-		qPCR
RC146F	F	CTATggccctggtaccGC	amplify FLAG-V5-tagged cDNA constructs. Pair with RC146R	60C		qPCR
RC146R	R	ggagagggttagggataggc	amplify FLAG-V5-tagged cDNA constructs. Pair with RC146F	60C		qPCR
DL121	F	CCGATGGGCTAAGGAGAAGA	Xist. Pair with DL122	-		qPCR
DL122	R	GATACCTGTGTGTCCTCCCC	Xist qPCR. Pair with DL121	-		qPCR
DL211	F	TGTTCCTACCCCCAATGTGT	GAPDH qPCR. Pair with DL212	-		qPCR
DL212	R	TGTGAGGGAGATGCTCAGTG	GAPDH qPCR. Pair with DL211	-		qPCR
DL217	F	TGTACGTTTGAAGGCATGAGTTGG	Malat1 qPCR. Pair with DL218	-		qPCR
DL218	R	CTGTCCTGGAACTCACTCTGTAGA	Malat1 qPCR. Pair with DL217	-		qPCR
MC1656	F	CTGCAACTCATTTCCCCATT	Kcnq1ot1 qPCR. Pair with MC1657	-		qPCR
MC1657	R	GGGGAGGAAAGTTTCTGGAG	Kcnq1ot1 qPCR. Pair with MC1656	-		qPCR
MS75	F	ACTATCATATGCTTACCGTAAC	Guide RNA sequencing primer	-		guide RNA Sequencing
