# Supplementary material
Source: HighWire-hosted journal article supplement (doi:10.1101/rna.079569.122)
Supplement: Supplemental_Table_S11.xlsx [file Supplemental_Table_S11.xlsx]

## Sheet: antibodies
Reagent	Source	Identifier	Usage Concentration
AlexaFluor488-Mouse IgG (H+L)	Invitrogen	A-11029	IF: 1:1,000
AlexaFluor488-Rabbit IgG (H+L)	Invitrogen	A-11034	IF: 1:1,000
AlexaFluor594-Mouse IgG (H+L)	Invitrogen	A-11032	IF: 1:1,000
AlexaFluor594-Rabbit IgG (H+L)	Invitrogen	A-11037	IF: 1:1,000
FLAG	Sigma-Aldrich	F1804	Western: 1:1000 IP: 20ug RIP: 10ug/10e6 cells IF: 1:500
GAPDH	Abcam	ab9484	Western: 1:1000
Goat anti Mouse IgG (H+L) Secondary Antibody, HRP	Thermo Scientific	A16072	Western: 1:100,000
Goat anti Rabbit IgG (H+L) Secondary Antibody, HRP	Thermo Scientific	G-21234	Western: 1:100,000
Total H3	Proteintech	17168-1-AP	Western: 1:1000 ChIP: 10ug/10e6 cells
H3K27me3	Abcam	ab6002	ChIP: 10ug/10e6 cells
hnRNPU	Santa Cruz	sc-32315	Western: 1:500
mouse IgG	Invitrogen	02-6502	RIP: 10ug (4uL)
SAFB	Bethyl	A300-812A	Western: 1:3,000 RIP: 10ug/10e6 cells IF: 1:200
SAFB2	Proteintech	11642-1-AP	Western: 1:10,000
SC35	Sigma-Aldrich	S4045	IF: 1:100
SRSF1	Santa Cruz	sc-33652	IF: 1:100
SRSF3	MBL	RN080PW	IF: 1:100
SRSF6	Bethyl	A303-669A	IF: 1:100
V5	Sigma-Aldrich	V8012	RIP: 10ug/10e6 cells
